# Supplementary material for: Multi-layered epigenetic control of persistent and stage-specific imprinted genes in rice endosperm
Source: Research Square preprint supplement (doi:10.21203/rs.3.rs-2403620/v1), 2023-01-11
Supplement: Supplementary file 1 [file Supplementary Data 1.xlsx]

## Sheet: Accessions
Supplementary Data 1. Summary of public datasets using in this study.
	Species name	Description	Accession No.	Reference
Genome resequence	Oryza sativa	Kasalath whole genome sequencing	DRR013715, DRR013716	n.a.
	Oryza sativa	93-11 whole genome sequencing	SRR933668, SRR933669	n.a.
RNA sequencing	Oryza sativa	02428 x Longtefu F1 endosperm	SRR3123571, SRR3123572	Yuan et al., 2017
	Oryza sativa	Longtefu x 02428 F1 endosperm	SRR3123479, SRR3123481	Yuan et al., 2017
	Oryza sativa	Nipponbare x 93-11 F1 endosperm	SRR8937097, SRR8937107	Rodrigues et al., 2021
	Oryza sativa	93-11 x Nipponbare F1 endosperm	SRR8937101, SRR8937109	Rodrigues et al., 2021
