# Supplementary material for: Multi-layered epigenetic control of persistent and stage-specific imprinted genes in rice endosperm
Source: Research Square preprint supplement (doi:10.21203/rs.3.rs-2403620/v1), 2023-01-11
Supplement: Supplementary file 4 [file Supplementary Data 2.xlsx]

## Sheet: 3 DAP endosperm
Supplementary Data 2. List of statistical values and maternal rates of imprinted genes in F1 endosperm and embryo.
Gene Name	Type of imprinting	Seed Coat Ratio		NIP-KAS combination											NIP-9311 combination											MSU annotation
				Imprinted	LR test by edgeR					Maternal rate (m / (m + 2p))					Imprinted	LR test by edgeR					Maternal rate (m / (m + 2p))
					logFC	lodCPM	LR	p value	FDR	NIP x KAS rep1	NIP x KAS rep2	KAS x NIP rep1	KAS x NIP rep2			logFC	lodCPM	LR	P value	FDR	NIP x 9311 rep1	NIP x 9311 rep2	9311 x NIP rep1	9311 x NIP rep2
LOC_Os01g02050	Locus-imprinted PEG	1		PEG	-7.47614	4.59968	70.0012	5.92699e-17	1.11483e-14	0.0163934	0	0.00298507	0		PEG	-7.12681	5.4479	141.856	1.04585e-32	3.4217e-30	0.00303951	0.00757576	0.0026738	0.0110429		phosphoenolpyruvate carboxylase, putative, expressed
LOC_Os01g03144	Unclassified PEG	1		PEG	-5.28713	5.24494	37.5011	9.13636e-10	6.9891e-08	0.0227273	0.102804	0.0105263	0		unknown	n.d.	n.d.	n.d.	n.d.	n.d.	n.d.	n.d.	n.d.	n.d.		white-brown complex homolog protein 7, putative, expressed
LOC_Os01g07610	Allelic imprinted MEG	1		biallele	0.273385	4.35194	0.175476	0.675291	1	0.532646	0.3	0.82716	0.461538		MEG	3.64415	2.13387	9.61764	0.00192717	0.025635	0.714286	1	1	0.92233		PPR repeat domain containing protein, putative, expressed
LOC_Os01g07920	Allelic imprinted PEG	0.232241		biallele	-3.67219	3.39757	11.1959	0.000819776	0.0213462	0.358779	0.0540541	0	0		PEG	-4.40985	2.99173	13.8434	0.000198691	0.00497601	0.0384615	0	0.117647	0		prolyl 4-hydroxylase, putative, expressed
LOC_Os01g07930	Locus-imprinted PEG	1		PEG	-2.85864	9.19227	55.2084	1.08402e-13	1.33318e-11	0.18548	0.0925	0.0981697	0.101634		PEG	-3.36297	8.37886	137.767	8.19631e-32	2.47127e-29	0.0813087	0.0760331	0.0956414	0.0856294		zinc finger C-x8-C-x5-C-x3-H type family protein, expressed
LOC_Os01g08570	Locus-imprinted PEG	1		PEG	-3.14705	5.73554	35.2626	2.88119e-09	2.08436e-07	0.0801688	0.212121	0.0649762	0.109067		PEG	-3.46479	5.09874	52.5623	4.16807e-13	3.25342e-11	0.126437	0.060241	0.0609929	0.0861111		2-oxoglutarate and iron-dependent oxygenase domain-containing protein2, putative, expressed
LOC_Os01g10080	Locus-imprinted MEG	1		MEG	4.9455	6.37987	57.716	3.02825e-14	4.61101e-12	0.925651	1	0.984307	0.967436		MEG	6.01843	6.10212	69.271	8.5824e-17	9.29377e-15	0.886792	0.969925	0.994558	0.996503		expressed protein
LOC_Os01g10520	Locus-imprinted MEG	1		MEG	6.75682	4.72545	61.0373	5.60049e-15	9.231e-13	0.956044	1	1	0.991803		MEG	5.70012	4.28236	60.9324	5.90683e-15	5.40651e-13	1	0.987013	0.965318	0.964706		expressed protein
LOC_Os01g11130	Allelic imprinted PEG	0.231583		biallele	-3.56061	2.10451	5.40452	0.0200847	0.266485	0	0.5	0	0.047619		PEG	-3.01333	4.0361	20.6288	5.57524e-06	0.000189669	0.139665	0.14433	0.049505	0.0830769		RNA recognition motif containing protein, putative, expressed
LOC_Os01g12890	Locus-imprinted MEG	1		MEG	5.66562	5.61285	63.7818	1.38988e-15	2.49679e-13	1	1	0.962617	0.91954		MEG	5.87892	5.37701	107.829	2.93024e-25	5.62685e-23	0.980769	0.975052	0.995546	0.975207		expressed protein
LOC_Os01g13180	Allelic imprinted MEG	1		biallele	4.81196	4.59358	15.9657	6.44993e-05	0.00218016	1	0.555556	0.993485	1		MEG	4.47672	1.55597	9.05201	0.00262406	0.0331282	0.833333	1	1	1		expressed protein
LOC_Os01g13404	Locus-imprinted PEG	1		PEG	-8.52491	6.88864	212.324	4.27397e-48	8.54154e-45	0.00740741	0.00227273	0.00181488	0		PEG	-6.36574	6.36257	182.389	1.45831e-41	9.34349e-39	0.0122358	0.0211203	0.0070922	0.00642055		ATP binding protein, putative, expressed
LOC_Os01g16810	Locus-imprinted PEG	0.320864		PEG	-4.12947	5.06735	26.5585	2.55684e-07	1.34469e-05	0.2	0.0366972	0.0397727	0		PEG	-6.7787	3.77602	50.7746	1.03605e-12	7.65932e-11	0.0276243	0.00884956	0	0		MYB family transcription factor, putative, expressed
LOC_Os01g17060	Allelic imprinted PEG	1		biallele	-1.08493	4.15901	2.31283	0.12831	0.836389	0.58427	0.17284	0.16129	0.24		PEG	-3.69932	3.40907	21.4276	3.67439e-06	0.000129191	0.172932	0.104072	0	0.047619		expressed protein
LOC_Os01g17990	Locus-imprinted PEG	1		PEG	-5.34798	5.79022	61.0079	5.6847e-15	8.33826e-13	0.0285714	0	0.027027	0.0309278		PEG	-5.7209	5.42671	107.959	2.74455e-25	5.27537e-23	0.00787402	0.015544	0.030853	0.0146819		expressed protein
LOC_Os01g18810	Allelic imprinted MEG	1		biallele	3.16907	4.21153	11.0998	0.000863377	0.0209068	0.986301	0.654135	1	0.862745		MEG	3.07915	3.80939	20.2296	6.86813e-06	0.000190979	0.87156	0.741379	0.903448	0.955947		expressed protein
LOC_Os01g24460	Locus-imprinted MEG	1		MEG	2.80008	6.76785	30.8714	2.75712e-08	1.7919e-06	0.812734	0.987013	0.876364	0.816344		MEG	4.14752	6.08084	83.8053	5.45992e-20	7.70249e-18	0.972414	0.9729	0.878292	0.923875		histone-like transcription factor and archaeal histone, putative, expressed
LOC_Os01g27570	Unclassified MEG	1		unknown	n.d.	n.d.	n.d.	n.d.	n.d.	n.d.	n.d.	n.d.	n.d.		MEG	6.34617	0.872239	11.9752	0.000539126	0.00898174	1	1	1	1		expressed protein
LOC_Os01g27750	Locus-imprinted PEG	1		PEG	-4.14647	6.13708	53.1576	3.07826e-13	3.64558e-11	0.17029	0.0859232	0.0133333	0.0263692		PEG	-4.96105	5.8098	55.3227	1.02279e-13	8.36564e-12	0.0799347	0.0275862	0.00166389	0.0233978		bifunctional 3-dehydroquinate dehydratase/shikimate dehydrogenase,chloroplast precursor, putative, expressed
LOC_Os01g28230	Allelic imprinted PEG	1		PEG	-4.54254	4.53796	33.4946	7.14631e-09	4.74088e-07	0.0702479	0.0610329	0	0		biallele	-1.76957	6.9008	6.24669	0.0124426	0.165367	0.0981781	0.0717547	0.445026	0.470769		ZOS1-07 - C2H2 zinc finger protein, expressed
LOC_Os01g28300	Allelic imprinted MEG	1		MEG	7.47825	6.32598	133.183	8.24455e-31	5.06976e-28	1	1	0.991984	0.986681		biallele	4.50999	7.22638	3.31937	0.0684681	0.41385	0.408503	0.367703	0.999066	1		OsFBX7 - F-box domain containing protein, expressed
LOC_Os01g28810	Allelic imprinted MEG	0.096745		biallele	5.75	1.00305	8.53969	0.00347485	0.0642264	1	1	1	1		MEG	6.10182	0.699744	10.7716	0.0010307	0.0154024	1	1	1	1		expressed protein
LOC_Os01g31629	Locus-imprinted PEG	1		PEG	-2.90694	3.43218	10.4494	0.00122687	0.0303172	0.274725	0.114754	0.0133333	0.0925926		PEG	-3.50637	3.26748	17.682	2.6109e-05	0.000788759	0.253731	0.0849057	0.0566038	0		expressed protein
LOC_Os01g32890	Unclassified PEG	1		unknown	n.d.	n.d.	n.d.	n.d.	n.d.	n.d.	n.d.	n.d.	n.d.		PEG	-3.96914	1.92771	9.15258	0.00248367	0.0439994	0.283019	0.038961	0	0		expressed protein
LOC_Os01g32980	Allelic imprinted PEG	1		biallele	-1.53841	3.70996	2.92417	0.0872621	0.668174	0.587786	0.146341	0	0.268293		PEG	-2.51597	3.07076	10.8567	0.000984373	0.0202092	0.294118	0.203125	0.037037	0.102804		mitochondrial carrier protein, putative, expressed
LOC_Os01g33370	Unclassified MEG	1		unknown	n.d.	n.d.	n.d.	n.d.	n.d.	n.d.	n.d.	n.d.	n.d.		MEG	2.60615	8.91044	47.6078	5.20619e-12	3.43586e-10	0.810839	0.850088	0.839283	0.895105		zinc-binding protein, putative, expressed
LOC_Os01g33650	Locus-imprinted PEG	1		PEG	-6.68133	6.21972	58.4287	2.10795e-14	2.8805e-12	0	0	0.029703	0.0315091		PEG	-7.44359	4.86362	117.061	2.78338e-27	6.02818e-25	0.00719424	0.010101	0.00423729	0		expressed protein
LOC_Os01g34400	Unclassified MEG	1		unknown	n.d.	n.d.	n.d.	n.d.	n.d.	n.d.	n.d.	n.d.	n.d.		MEG	7.73881	3.56632	60.3602	7.89956e-15	7.1036e-13	1	0.988827	1	1		transposon%20protein%2C%20putative%2C%20Pong%20sub-class%2C%20expressed
LOC_Os01g34410	Unclassified MEG	1		unknown	n.d.	n.d.	n.d.	n.d.	n.d.	n.d.	n.d.	n.d.	n.d.		MEG	7.80074	5.54786	144.919	2.23704e-33	7.81793e-31	0.995851	1	0.983229	1		transposon%20protein%2C%20putative%2C%20Pong%20sub-class%2C%20expressed
LOC_Os01g34890	Unclassified PEG	0.165042		unknown	n.d.	n.d.	n.d.	n.d.	n.d.	n.d.	n.d.	n.d.	n.d.		PEG	-4.25941	3.08818	19.1071	1.23586e-05	0.000393842	0.147287	0.030303	0	0.0666667		GLUCAN SYNTHASE-LIKE protein, putative, expressed
LOC_Os01g36840	Locus-imprinted PEG	1		PEG	-3.45922	4.81315	29.1595	6.66579e-08	3.87537e-06	0.171717	0.0385965	0.112299	0.0825083		PEG	-3.39122	5.17728	47.0384	6.96079e-12	4.69892e-10	0.0657895	0.0488889	0.0756972	0.172222		ATP-binding region, ATPase-like domain containing protein, expressed
LOC_Os01g37580	Unclassified MEG	1		unknown	n.d.	n.d.	n.d.	n.d.	n.d.	n.d.	n.d.	n.d.	n.d.		MEG	5.30946	4.2843	33.2385	8.15209e-09	3.74193e-07	0.926829	0.857143	1	0.992883		retrotransposon%20protein%2C%20putative%2C%20unclassified%2C%20expressed
LOC_Os01g38650	Unclassified MEG	1		unknown	n.d.	n.d.	n.d.	n.d.	n.d.	n.d.	n.d.	n.d.	n.d.		MEG	5.71815	4.7633	42.7462	6.23238e-11	3.80299e-09	0.938144	0.93266	1	1		expressed protein
LOC_Os01g40450	Locus-imprinted MEG	1		MEG	6.16551	4.97909	50.8705	9.8665e-13	1.25195e-10	1	1	0.99359	0.972603		MEG	4.51696	4.15361	15.8458	6.87199e-05	0.00149252	0.861386	0.733333	0.988593	1		2-aminoethanethiol dioxygenase, putative, expressed
LOC_Os01g40590	Locus-imprinted PEG	1		PEG	-3.79161	6.67059	54.3576	1.67134e-13	2.02435e-11	0.159763	0.0769231	0.0584879	0.0143043		PEG	-4.69168	6.86178	93.4821	4.09896e-22	7.2448e-20	0.0699301	0.0124717	0.0229508	0.0385542		tyrosine protein kinase domain containing protein, putative, expressed
LOC_Os01g41310	Allelic imprinted PEG	1		biallele	-2.42786	3.03333	2.90876	0.0880997	0.671692	0.368421	1	0.0243902	0.0322581		PEG	-3.45857	2.68419	12.9006	0.000328471	0.00767614	0.166667	0.0163934	0	0.153846		OsFBX18 - F-box domain containing protein, expressed
LOC_Os01g41370	Locus-imprinted PEG	1		PEG	-5.06341	6.39978	48.8255	2.79776e-12	2.77829e-10	0.0654628	0.003367	0.0212766	0.0145577		PEG	-4.67598	5.99947	53.0043	3.32815e-13	2.62446e-11	0.00931677	0.0202429	0.0605428	0.0914729		FBD domain containing protein, putative, expressed
LOC_Os01g42210	Unclassified MEG	1		unknown	n.d.	n.d.	n.d.	n.d.	n.d.	n.d.	n.d.	n.d.	n.d.		MEG	3.49311	1.71423	10.1351	0.00145471	0.0204098	0.939394	1	0.875	0.837838		LTPL47 - Protease inhibitor/seed storage/LTP family protein precursor, putative, expressed
LOC_Os01g42260	Locus-imprinted PEG	1		PEG	-1.64932	7.01036	17.826	2.42051e-05	0.000928037	0.243767	0.172492	0.292285	0.26035		PEG	-2.76624	7.09975	48.7085	2.96971e-12	2.08517e-10	0.106306	0.0520394	0.1649	0.192946		transcriptional corepressor LEUNIG, putative, expressed
LOC_Os01g42270	Locus-imprinted MEG	1		MEG	12.3798	6.85042	213.47	2.40298e-48	5.48841e-45	1	1	1	1		MEG	7.20089	7.17156	203.659	3.32162e-46	2.32166e-43	0.987631	0.983575	0.997046	1		transcriptional corepressor LEUNIG, putative, expressed
LOC_Os01g42970	Allelic imprinted PEG	1		biallele	-1.3866	6.64732	12.6199	0.000381652	0.0108768	0.427896	0.155378	0.258883	0.265854		PEG	-2.41063	5.49366	30.9572	2.6378e-08	1.23663e-06	0.183838	0.193548	0.107623	0.127098		zinc finger C-x8-C-x5-C-x3-H type family protein, expressed
LOC_Os01g46910	Unclassified MEG	1		unknown	n.d.	n.d.	n.d.	n.d.	n.d.	n.d.	n.d.	n.d.	n.d.		MEG	6.29462	2.3211	23.3946	1.31951e-06	4.16634e-05	1	0.960784	1	1		microneme protein Sm70, putative, expressed
LOC_Os01g47130	Allelic imprinted MEG	1		MEG	2.68857	4.21767	14.1692	0.000167085	0.00501193	0.729167	0.803571	0.844828	0.957219		biallele	1.43721	3.76199	6.34219	0.0117899	0.112815	0.783133	0.699346	0.684211	0.674419		expressed protein
LOC_Os01g48580	Locus-imprinted MEG	1		MEG	10.0259	4.53455	74.0275	7.70351e-18	1.83826e-15	1	1	1	1		MEG	5.9983	4.25286	45.7938	1.3138e-11	8.41766e-10	0.95082	0.9375	1	1		ubiquitin-conjugating enzyme E2, putative, expressed
LOC_Os01g54100	Locus-imprinted PEG	1		PEG	-2.83962	6.6684	34.9005	3.47e-09	2.45479e-07	0.277344	0.202186	0.0490196	0.0605653		PEG	-2.54214	6.3469	41.8414	9.89861e-11	6.11289e-09	0.19244	0.18374	0.144208	0.0542636		CK1 CaseinKinase 1a.2 - CK1 includes the casein kinase 1 kinases, expressed
LOC_Os01g54784	Locus-imprinted PEG	1		PEG	-5.89846	5.95469	58.7282	1.81027e-14	2.51674e-12	0.0574257	0.0169492	0.00974026	0		PEG	-6.27198	5.51731	47.2201	6.34454e-12	4.35536e-10	0.0556701	0.0513219	0	0		expressed protein
LOC_Os01g55450	Unclassified PEG	1		unknown	n.d.	n.d.	n.d.	n.d.	n.d.	n.d.	n.d.	n.d.	n.d.		PEG	-5.2902	6.94371	223.785	1.35126e-50	1.73152e-47	0.0206805	0.0174825	0.0293907	0.0283019		CAMK KIN1/SNF1/Nim1 like.11 - CAMK includes calcium/calmodulin depedent protein kinases, expressed
LOC_Os01g55720	Allelic imprinted PEG	1		biallele	-1.38291	5.92694	10.2051	0.00140054	0.0340723	0.347368	0.175385	0.206434	0.418655		PEG	-1.78444	5.49236	17.2081	3.35001e-05	0.000994462	0.209472	0.122402	0.265306	0.272401		expressed protein
LOC_Os01g56100	Allelic imprinted PEG	0.293899		biallele	-4.18025	3.33023	12.2819	0.000457384	0.0128292	0.308411	0.0555556	0	0		PEG	-4.37539	3.29615	15.7361	7.28228e-05	0.00202862	0.157233	0.2	0	0		BSD domain containing protein, expressed
LOC_Os01g56110	Locus-imprinted PEG	1		PEG	-7.01031	6.19511	98.3532	3.50035e-23	1.36496e-20	0.00197239	0	0.0192525	0.00569801		PEG	-5.42345	5.79706	91.8255	9.46649e-22	1.59963e-19	0.00831947	0.00942127	0.0331492	0.0504451		RNA recognition motif containing protein, putative, expressed
LOC_Os01g56580	Locus-imprinted PEG	1		PEG	-3.28021	8.32396	73.314	1.10583e-17	2.3892e-15	0.183352	0.0908354	0.0725894	0.0507365		PEG	-2.76812	8.10219	94.5834	2.3498e-22	4.2015e-20	0.120177	0.0892807	0.168221	0.121368		CK1 CaseinKinase 1a.3 - CK1 includes the casein kinase 1 kinases, expressed
LOC_Os01g56820	Locus-imprinted PEG	1		PEG	-2.23782	5.34545	19.382	1.0701e-05	0.00044323	0.144476	0.10687	0.245283	0.215116		PEG	-3.46025	3.15023	18.2646	1.92247e-05	0.000596003	0.0204082	0.0617284	0.0743802	0.190083		AGAP000951-PA, putative, expressed
LOC_Os01g57770	Allelic imprinted MEG	1		biallele	2.26076	2.52093	2.80517	0.0939608	0.58793	0.731092	0.826087	NA	1		MEG	7.62531	1.8037	21.2297	4.074e-06	0.0001182	1	1	1	1		OsPOP4 - Putative Prolyl Oligopeptidase homologue, expressed
LOC_Os01g60750	Locus-imprinted MEG	1		MEG	10.0045	4.53511	76.6035	2.08964e-18	5.38857e-16	1	1	1	1		MEG	7.89837	2.07166	24.1758	8.79312e-07	2.88298e-05	1	1	1	1		transposon%20protein%2C%20putative%2C%20unclassified%2C%20expressed
LOC_Os01g61020	Allelic imprinted PEG	1		PEG	-5.70465	3.47577	20.7863	5.13481e-06	0.000222481	0.062069	0	0	0		biallele	-2.22116	1.68552	3.97153	0.0462758	0.445457	0.222222	0.555556	0.04	0.107692		curculin-like lectin family protein, putative, expressed
LOC_Os01g61420	Allelic imprinted PEG	0.13768		biallele	-0.784095	5.22173	1.95645	0.161894	0.91575	0.432526	0.685185	0.233792	0.269504		PEG	-2.28693	4.54444	15.4843	8.31945e-05	0.00228443	0.293233	0.227723	0.177665	0.0588235		zinc finger, C3HC4 type domain containing protein, expressed
LOC_Os01g61590	Locus-imprinted PEG	1		PEG	-6.12975	6.32652	27.3483	1.6991e-07	9.14653e-06	0.150074	0.0466531	0	0		PEG	-5.25549	5.81523	66.9638	2.76541e-16	3.01587e-14	0.0686813	0.0103093	0.00514139	0.021645		CAMK CAMK like.1 - CAMK includes calcium/calmodulin depedent protein kinases, expressed
LOC_Os01g62460	Locus-imprinted PEG	1		PEG	-4.2581	4.83447	31.9961	1.54481e-08	9.72378e-07	0.160494	0.0916667	0.00578035	0.0169492		PEG	-3.38898	4.46965	27.708	1.41078e-07	6.026e-06	0.0650888	0.045082	0.0441176	0.22314		ZOS1-16 - C2H2 zinc finger protein, expressed
LOC_Os01g63250	Locus-imprinted PEG	1		PEG	-5.38059	5.66864	50.801	1.02223e-12	1.12713e-10	0.162162	0.0116959	0.00157978	0.0180361		PEG	-6.61855	5.26187	85.0052	2.97584e-20	4.15995e-18	0.036036	0.0137525	0.00170358	0		josephin, putative, expressed
LOC_Os01g65770	Allelic imprinted MEG	1		biallele	3.17499	2.87346	1.98278	0.159098	0.761802	1	1	0.333333	0		MEG	4.49803	2.85839	22.8685	1.73468e-06	5.36704e-05	0.975309	0.882353	0.958763	1		expressed protein
LOC_Os01g65850	Locus-imprinted PEG	1		PEG	-9.88207	7.62402	192.94	7.2538e-44	1.15974e-40	0	0	0.00110988	0.00716846		PEG	-6.88244	7.58904	57.6722	3.09656e-14	2.6601e-12	0.000957549	0.00163513	0.0486957	0.0184426		CHD3-type chromatin-remodeling factor PICKLE, putative, expressed
LOC_Os01g65986	Locus-imprinted PEG	1		PEG	-3.01531	5.88771	49.2862	2.21211e-12	2.25269e-10	0.192708	0.0719603	0.0928962	0.0945455		PEG	-2.86896	5.37363	40.7353	1.74309e-10	1.05112e-08	0.117647	0.184874	0.125858	0.057187		DUF803 domain containing, putative, expressed
LOC_Os01g66070	Unclassified PEG	1		unknown	n.d.	n.d.	n.d.	n.d.	n.d.	n.d.	n.d.	n.d.	n.d.		PEG	-8.2831	2.20244	35.6401	2.37346e-09	1.27611e-07	0	0	0	0		PHD-finger domain containing protein, putative
LOC_Os01g66300	Locus-imprinted PEG	1		PEG	-4.92069	5.37806	67.6122	1.99037e-16	3.45891e-14	0.064588	0.0232558	0.00746269	0.0337079		PEG	-3.74444	3.35618	17.6234	2.6926e-05	0.000811845	0.0314465	0.0526316	0.130435	0		KH domain containing protein, putative, expressed
LOC_Os01g66510	Unclassified MEG	1		unknown	n.d.	n.d.	n.d.	n.d.	n.d.	n.d.	n.d.	n.d.	n.d.		MEG	3.5299	1.81162	10.3865	0.0012694	0.0182768	0.857143	0.960784	0.894737	1		MLO domain containing protein, putative, expressed
LOC_Os01g67250	Locus-imprinted PEG	1		PEG	-2.96871	7.2203	37.4629	9.31697e-10	7.0597e-08	0.25572	0.202811	0.0386997	0.0612992		PEG	-3.62512	6.90437	131.795	1.6586e-30	4.39728e-28	0.0963927	0.0703174	0.0483057	0.0746753		Rad21 / Rec8 like protein, putative, expressed
LOC_Os01g67390	Allelic imprinted MEG	0.0689103		biallele	5.34514	0.951748	6.05891	0.0138363	0.180583	1	1	1	NA		MEG	4.79002	-0.178621	8.69238	0.00319543	0.0387814	1	1	1	1		POEI32 - Pollen Ole e I allergen and extensin family protein precursor, expressed
LOC_Os01g68820	Locus-imprinted PEG	1		PEG	-8.33345	9.72818	243.078	8.38448e-55	1.34051e-50	0.00116618	0.00551524	0.00232945	0.00416871		PEG	-8.54159	8.02946	446.568	4.02795e-99	6.19377e-95	0.00305437	0.00251636	0.00296896	0.00176118		expressed protein
LOC_Os01g69040	Locus-imprinted PEG	1		PEG	-4.51454	3.83346	17.8644	2.37219e-05	0.000913893	0.16129	0.12	0	0.00534759		PEG	-5.72726	3.36833	36.7836	1.31996e-09	7.24894e-08	0.0294118	0.0519481	0	0		zinc finger, C3HC4 type domain containing protein, expressed
LOC_Os01g69850	Allelic imprinted PEG	0.264324		biallele	-0.79507	6.88401	2.65988	0.102909	0.739131	0.378564	0.140562	0.489242	0.40966		PEG	-3.05861	5.76783	39.2045	3.81653e-10	2.24854e-08	0.255396	0.0983302	0.0759878	0.0415335		OsMADS65 - MADS-box family gene with MIKC* type-box, expressed
LOC_Os01g69920	Allelic imprinted PEG	0.18825		biallele	-1.30635	5.32549	5.54591	0.018524	0.254872	0.594937	0.101639	0.219814	0.229091		PEG	-3.30843	5.00204	35.5844	2.44236e-09	1.30403e-07	0.17226	0.0618893	0.0893855	0.034632		histidine kinase, putative, expressed
LOC_Os01g69930	Locus-imprinted PEG	1		PEG	-8.53783	3.10221	36.6577	1.40803e-09	1.0374e-07	0	0	0	0		PEG	-8.41507	2.37818	39.121	3.98343e-10	2.32902e-08	0	0	0	0		dnaJ domain containing protein, expressed
LOC_Os01g69940	Locus-imprinted PEG	1		PEG	-4.70997	3.64413	24.58	7.12893e-07	3.57296e-05	0.0714286	0.117647	0	0.0153846		PEG	-4.75782	3.11059	15.0694	0.000103628	0.00278582	0.2	0.114754	0	0		OsFBX32 - F-box domain containing protein, expressed
LOC_Os01g73450	Locus-imprinted PEG	1		PEG	-4.52525	3.70875	14.2692	0.000158436	0.00502594	0.197674	0.111111	0	0		PEG	-6.6214	2.5536	32.2585	1.34968e-08	6.60956e-07	0.037037	0	0	0		amino acid kinase, putative, expressed
LOC_Os02g01490	Locus-imprinted PEG	1		PEG	-2.73546	4.18402	16.3058	5.38986e-05	0.00194084	0.24031	0.22807	0.0806452	0.0536585		PEG	-2.38929	6.79365	58.5606	1.9712e-14	1.79356e-12	0.136828	0.121005	0.164153	0.2		expressed protein
LOC_Os02g02400	Allelic imprinted MEG	0.0343813		biallele	4.72878	0.434984	6.93099	0.00847149	0.126216	1	1	1	1		MEG	5.00272	-0.0555318	9.18273	0.0024431	0.0314373	1	1	1	1		catalase isozyme A, putative, expressed
LOC_Os02g03600	Allelic imprinted PEG	1		biallele	-1.65157	5.42745	7.91845	0.00489333	0.0951758	0.128906	0.146283	0.456221	0.307317		PEG	-2.46641	3.0706	10.8269	0.00100035	0.0204251	0.154472	0.056	0.133333	0.244444		dnaJ domain containing protein, expressed
LOC_Os02g03700	Allelic imprinted PEG	1		biallele	-2.5328	2.92255	3.8669	0.0492474	0.486931	0.428571	0	0.130435	0		PEG	-4.63027	2.88659	17.3135	3.16932e-05	0.000946304	0.115152	0.0232558	0	0		expressed protein
LOC_Os02g04190	Unclassified MEG	0.0802485		MEG	6.88405	2.00092	10.8835	0.000970259	0.0228798	1	1	1	1		unknown	n.d.	n.d.	n.d.	n.d.	n.d.	n.d.	n.d.	n.d.	n.d.		THION23 - Plant thionin family protein precursor, expressed
LOC_Os02g04450	Allelic imprinted PEG	1		PEG	-4.72176	3.96532	19.0619	1.26549e-05	0.000518786	0.0736842	0.232323	0	0		biallele	-6.86347	0.950111	11.7312	0.000614618	0.0134247	0	0	NA	0		plant-specific domain TIGR01589 family protein, putative, expressed
LOC_Os02g05520	Unclassified PEG	1		unknown	n.d.	n.d.	n.d.	n.d.	n.d.	n.d.	n.d.	n.d.	n.d.		PEG	-6.96947	1.03527	15.5368	8.09158e-05	0.00223383	0	0	0	0		expressed protein
LOC_Os02g05630	Allelic imprinted PEG	1		biallele	-2.59669	4.94039	16.1792	5.76228e-05	0.00206102	0.302326	0.104072	0.0272727	0.15122		PEG	-3.28809	5.10314	47.2338	6.3005e-12	4.34452e-10	0.135	0.0478589	0.103641	0.0731707		protein phosphatase 2C, putative, expressed
LOC_Os02g06390	Unclassified PEG	1		PEG	-5.22427	4.15061	31.1404	2.4002e-08	1.47594e-06	0.025641	0.117647	0.0136986	0		unknown	n.d.	n.d.	n.d.	n.d.	n.d.	n.d.	n.d.	n.d.	n.d.		expressed protein
LOC_Os02g06890	Unclassified PEG	1		PEG	-6.25798	7.34578	56.2835	6.27411e-14	8.02484e-12	0.0739726	0.0386399	0.00393479	0.000477783		unknown	n.d.	n.d.	n.d.	n.d.	n.d.	n.d.	n.d.	n.d.	n.d.		OTU-like cysteine protease family protein, putative, expressed
LOC_Os02g07790	Locus-imprinted PEG	1		PEG	-3.43732	5.54123	14.8139	0.000118655	0.00389502	0.269006	0.263598	0.0393375	0		PEG	-3.44864	5.48576	51.9871	5.5867e-13	4.29534e-11	0.130919	0.0977918	0.0421053	0.0623701		serine/threonine-protein kinase HT1, putative, expressed
LOC_Os02g08300	Locus-imprinted PEG	1		PEG	-4.67376	7.01053	45.6802	1.39222e-11	1.30168e-09	0.167521	0.0517857	0.0165138	0.00380228		PEG	-6.02803	6.93765	64.4675	9.81383e-16	9.99386e-14	0.064257	0.0325301	0.00676183	0		RAD23 DNA repair protein, putative, expressed
LOC_Os02g08490	Allelic imprinted MEG	1		biallele	0.119186	2.56545	0.00975444	0.921325	1	1	0.393939	0.333333	0.333333		MEG	3.09243	2.28867	11.4055	0.000732279	0.0115608	0.861111	0.823529	0.945946	0.916667		chaperone protein clpB 1, putative, expressed
LOC_Os02g09580	Locus-imprinted MEG	1		MEG	8.45307	3.06468	29.4855	5.63374e-08	3.49117e-06	1	1	1	1		MEG	5.22909	1.476	13.3872	0.000253346	0.00461576	0.866667	1	1	1		OsFBX39 - F-box domain containing protein, expressed
LOC_Os02g09770	Locus-imprinted PEG	1		PEG	-4.65617	4.46007	26.4037	2.77004e-07	1.4473e-05	0.179104	0.0202429	0	0.015873		PEG	-5.15936	4.37905	43.9128	3.43338e-11	2.19979e-09	0.07393	0.00330033	0.00398406	0.0334928		abhydrolase domain-containing protein FAM108C1, putative, expressed
LOC_Os02g10100	Allelic imprinted PEG	1		biallele	-1.65571	4.72387	6.45483	0.0110651	0.176909	0.166667	0.208	0.151079	0.348315		PEG	-1.6083	5.27376	16.9452	3.84743e-05	0.00112689	0.28115	0.207048	0.238095	0.225092		leucine-rich repeat receptor protein kinase EXS precursor, putative, expressed
LOC_Os02g10650	Unclassified PEG	1		unknown	n.d.	n.d.	n.d.	n.d.	n.d.	n.d.	n.d.	n.d.	n.d.		PEG	-3.31168	4.38188	31.603	1.89134e-08	9.03203e-07	0.171271	0.103448	0.0895522	0.0265487		CRAL/TRIO domain containing protein, expressed
LOC_Os02g12840	Locus-imprinted PEG	1		PEG	-4.41349	4.99079	60.161	8.74077e-15	1.24774e-12	0.0673575	0.0344828	0.0333333	0.048		PEG	-3.90684	6.26402	44.529	2.50617e-11	1.63294e-09	0.027027	0.0181125	0.150235	0.129237		DEAD-box ATP-dependent RNA helicase, putative, expressed
LOC_Os02g12870	Locus-imprinted PEG	1		PEG	-4.40043	3.85761	16.5868	4.6474e-05	0.00169254	0.213675	0.139241	0	0		PEG	-4.32627	4.93223	65.8395	4.89168e-16	5.15201e-14	0.0724638	0.0681004	0.039548	0.019084		expressed protein
LOC_Os02g13870	Allelic imprinted MEG	0.0268949		biallele	3.68034	0.961941	4.44942	0.0349131	0.327769	0.997984	1	1	1		MEG	4.88219	-0.131333	8.98691	0.0027192	0.0340775	1	1	1	1		aquaporin protein, putative, expressed
LOC_Os02g14600	Allelic imprinted PEG	1		biallele	-0.177681	10.8638	0.0688894	0.792961	1	0.692964	0.431579	0.267954	0.312931		PEG	-1.29959	7.67389	14.4864	0.000141173	0.00366693	0.270423	0.281938	0.267068	0.288798		glutelin, putative, expressed
LOC_Os02g15350	Allelic imprinted MEG	1		MEG	2.39945	8.80711	30.1334	4.03332e-08	2.58975e-06	0.862178	0.859829	0.822723	0.774375		biallele	2.09157	5.56699	9.88185	0.00166917	0.0229168	0.927711	0.945289	0.467041	0.5825		dof zinc finger domain containing protein, putative, expressed
LOC_Os02g17910	Locus-imprinted PEG	1		PEG	-6.40998	4.19616	50.7045	1.07375e-12	1.16107e-10	0.0240964	0.0253165	0	0		PEG	-9.73552	4.88563	131.873	1.59484e-30	4.30244e-28	0.0027248	0	0	0		CK1 CaseinKinase 1.4 - CK1 includes the casein kinase 1 kinases, expressed
LOC_Os02g19220	Allelic imprinted PEG	1		biallele	-1.41284	6.8834	15.0043	0.000107269	0.00356161	0.235639	0.361111	0.275552	0.222018		PEG	-1.91313	6.5513	35.3753	2.71917e-09	1.44181e-07	0.289929	0.214414	0.170498	0.151598		expressed protein
LOC_Os02g19340	Unclassified MEG	1		unknown	n.d.	n.d.	n.d.	n.d.	n.d.	n.d.	n.d.	n.d.	n.d.		MEG	4.9732	1.24064	11.6274	0.000649876	0.0104422	1	1	0.833333	1		expressed protein
LOC_Os02g19880	Locus-imprinted MEG	1		MEG	9.57192	4.1458	54.4046	1.63179e-13	2.24906e-11	1	1	1	1		MEG	10.2761	4.21632	87.5251	8.32189e-21	1.29258e-18	1	1	1	1		expressed protein
LOC_Os02g20394	Unclassified PEG	1		PEG	-7.66816	2.25044	18.846	1.41709e-05	0.000574642	0	0	0	0		unknown	n.d.	n.d.	n.d.	n.d.	n.d.	n.d.	n.d.	n.d.	n.d.		dnaJ domain containing protein, expressed
LOC_Os02g21430	Locus-imprinted PEG	1		PEG	-7.48892	6.95609	69.4533	7.82444e-17	1.45462e-14	0.0289116	0	0	0.00225225		PEG	-6.92201	6.88982	114.363	1.08533e-26	2.22522e-24	0.00453172	0.00236128	0.00311042	0.0241117		AML1, putative, expressed
LOC_Os02g21460	Allelic imprinted PEG	0.0679382		biallele	-2.19482	3.09367	3.88713	0.0486574	0.48259	0.661538	0.288889	0.0512821	0.0322581		PEG	-2.52852	3.69684	13.2546	0.000271913	0.0064959	0.275168	0.148515	0.0340909	0.13		uncharacterized protein yqjG, putative, expressed
LOC_Os02g21550	Allelic imprinted MEG	0.263606		biallele	5.10278	0.571313	7.90677	0.00492501	0.0836102	1	1	1	1		MEG	5.24558	0.0982198	9.33954	0.00224262	0.029274	1	1	1	1		flavonol synthase/flavanone 3-hydroxylase, putative, expressed
LOC_Os02g23950	Locus-imprinted MEG	1		MEG	8.78564	3.36935	36.6328	1.42613e-09	1.16302e-07	1	1	1	1		MEG	9.55348	3.51394	62.6591	2.45772e-15	2.34735e-13	1	1	1	1		transposon%20protein%2C%20putative%2C%20Pong%20sub-class%2C%20expressed
LOC_Os02g25820	Locus-imprinted MEG	1		MEG	6.77094	6.86921	80.2959	3.22345e-19	8.8856e-17	1	0.995809	0.988024	0.952542		MEG	6.27736	7.45363	165.865	5.92048e-38	2.75876e-35	0.981961	0.964534	0.996454	0.997312		B3 DNA binding domain containing protein, expressed
LOC_Os02g28580	Locus-imprinted MEG	1		MEG	8.5537	5.78472	136.688	1.411e-31	9.39959e-29	1	0.993127	1	0.995305		MEG	7.51017	6.23155	206.387	8.43706e-47	6.48683e-44	0.99093	0.992754	0.991561	1		expressed protein
LOC_Os02g28660	Locus-imprinted MEG	1		MEG	10.5351	5.04826	99.5881	1.87628e-23	6.97627e-21	1	1	1	1		MEG	8.5252	6.08433	210.846	8.97825e-48	7.26624e-45	0.995968	0.991597	0.99776	1		expressed protein
LOC_Os02g29110	Unclassified PEG	1		PEG	-3.73561	3.18793	13.9204	0.000190719	0.00590933	0.0769231	0	0.0833333	0.0588235		unknown	n.d.	n.d.	n.d.	n.d.	n.d.	n.d.	n.d.	n.d.	n.d.		ankyrin repeat family protein, putative, expressed
LOC_Os02g29130	Locus-imprinted PEG	1		PEG	-9.27522	3.73874	57.4124	3.53371e-14	4.7148e-12	0	0	0	0		PEG	-6.44257	3.94623	51.1783	8.43471e-13	6.35787e-11	0.0140845	0.0424242	0	0		ankyrin, putative, expressed
LOC_Os02g29140	Locus-imprinted PEG	1		PEG	-4.21197	5.45135	49.4494	2.03551e-12	2.10626e-10	0.0385488	0.0277778	0.111111	0.0386473		PEG	-5.32824	5.27484	21.0945	4.37174e-06	0.000151748	0.00182815	0	0.161954	0.110647		ankyrin, putative, expressed
LOC_Os02g29150	Allelic imprinted PEG	1		biallele	-1.5002	5.26617	4.17495	0.0410259	0.437573	0.873684	0.292308	0.087108	0.126168		PEG	-1.90234	5.24098	20.3785	6.35399e-06	0.000212403	0.183206	0.162393	0.176991	0.289026		OsFBO11 - F-box and other domain containing protein, expressed
LOC_Os02g29230	Locus-imprinted MEG	1		MEG	10.4777	7.04794	147.695	5.53175e-34	4.2115e-31	1	0.983333	1	1		MEG	6.20192	5.73604	70.5649	4.45365e-17	4.89169e-15	0.956332	0.946154	0.997351	0.998026		expressed protein
LOC_Os02g30420	Allelic imprinted MEG	1		MEG	2.26292	5.24666	15.9974	6.34288e-05	0.00215308	0.800587	0.943262	0.745098	0.81982		biallele	1.91264	3.69526	10.0715	0.00150583	0.0209739	0.87037	0.767857	0.638191	0.823129		expressed protein
LOC_Os02g31140	Allelic imprinted MEG	1		MEG	3.90968	4.43296	26.9247	2.11542e-07	1.16625e-05	0.956364	0.990196	0.854545	0.862595		biallele	2.9689	5.5492	17.6763	2.61866e-05	0.000649469	0.959476	0.947149	0.675789	0.810811		major ampullate spidroin 2-2, putative, expressed
LOC_Os02g32210	Allelic imprinted MEG	1		biallele	6.36643	1.72604	6.91309	0.00855669	0.126906	1	1	NA	NA		MEG	5.27766	3.26783	31.2534	2.2645e-08	9.78122e-07	0.985612	0.909774	1	1		expressed protein
LOC_Os02g32650	Unclassified MEG	1		unknown	n.d.	n.d.	n.d.	n.d.	n.d.	n.d.	n.d.	n.d.	n.d.		MEG	6.07375	0.577366	12.4096	0.000427143	0.00727372	1	1	1	1		expressed protein
LOC_Os02g33530	Unclassified MEG	1		unknown	n.d.	n.d.	n.d.	n.d.	n.d.	n.d.	n.d.	n.d.	n.d.		MEG	6.57204	0.93231	13.1074	0.000294129	0.0052591	1	1	1	1		retrotransposon%20protein%2C%20putative%2C%20unclassified%2C%20expressed
LOC_Os02g33700	Locus-imprinted MEG	1		MEG	7.97437	2.64065	21.671	3.23648e-06	0.000146586	1	1	1	1		MEG	8.07688	4.14025	67.0244	2.68161e-16	2.74901e-14	1	0.974359	1	1		expressed protein
LOC_Os02g34330	Allelic imprinted MEG	1		biallele	6.65447	1.85898	7.44441	0.00636336	0.102661	NA	NA	1	1		MEG	6.32946	0.816861	11.835	0.000581292	0.00957016	1	1	1	1		retrotransposon%20protein%2C%20putative%2C%20unclassified%2C%20expressed
LOC_Os02g34360	Allelic imprinted PEG	1		biallele	-4.69656	1.9259	6.75716	0.00933725	0.157472	0	0	0	0.166667		PEG	-4.78702	1.93736	10.569	0.00115002	0.0230258	0	0	0.125	0		expressed protein
LOC_Os02g34370	Locus-imprinted PEG	1		PEG	-3.9158	6.17476	62.7885	2.30141e-15	3.53797e-13	0.0633397	0.0319285	0.0672451	0.098646		PEG	-4.22867	4.90698	50.7595	1.04405e-12	7.68148e-11	0.0925926	0.0891473	0.0190114	0.0193548		expressed protein
LOC_Os02g34990	Locus-imprinted MEG	1		MEG	2.77813	7.95473	69.1203	9.26377e-17	2.02889e-14	0.882893	0.830123	0.848622	0.878049		MEG	3.66906	7.14487	73.0828	1.24325e-17	1.44829e-15	0.882448	0.846575	0.968881	0.939829		ACT domain containing protein, putative, expressed
LOC_Os02g35010	Locus-imprinted PEG	1		PEG	-2.95434	7.73384	44.7639	2.2228e-11	2.01921e-09	0.122944	0.070922	0.135279	0.111111		PEG	-4.44995	6.8355	91.9395	8.93675e-22	1.52689e-19	0.0673732	0.0665669	0.00944882	0.0363951		STE MEKK ste11 MAP3K.9 - STE kinases include homologs to sterile 7, sterile 11 and sterile 20 from yeast, expressed
LOC_Os02g35144	Allelic imprinted PEG	1		biallele	-1.81397	3.77918	4.55501	0.0328227	0.380655	0.538462	0.397849	0.0414201	0.150442		PEG	-2.67382	3.54928	9.3724	0.00220277	0.0402338	0.267081	0.262295	0.0802139	0		zinc finger, C3HC4 type domain containing protein, expressed
LOC_Os02g36360	Allelic imprinted PEG	0.273407		PEG	-3.01986	5.51871	32.255	1.35207e-08	8.55691e-07	0.151943	0.21118	0.0629921	0.0514286		biallele	-3.49548	4.10347	11.1632	0.000834358	0.0173847	0.372881	0.176471	0.032	0.002457		ZOS2-11 - C2H2 zinc finger protein, expressed
LOC_Os02g36680	Locus-imprinted PEG	1		PEG	-2.65419	10.5338	56.3051	6.2055e-14	8.00109e-12	0.150235	0.117374	0.134247	0.138529		PEG	-3.7581	3.23535	19.6875	9.11976e-06	0.000298371	0.113402	0	0.0958904	0.0294118		expressed protein
LOC_Os02g37856	Allelic imprinted PEG	1		biallele	-2.0446	1.37222	0.982709	0.321531	1	0.230769	0	NA	NA		PEG	-2.40763	4.21616	17.5224	2.83942e-05	0.00085277	0.152416	0.0784314	0.267442	0.124183		expressed protein
LOC_Os02g39920	Locus-imprinted PEG	1		PEG	-4.87832	6.17886	98.1279	3.9222e-23	1.49305e-20	0.0557377	0.0383275	0.0183824	0.0277778		PEG	-4.81606	9.73257	164.728	1.04915e-37	5.37758e-35	0.024476	0.0200498	0.0437299	0.0505309		AT hook motif family protein, expressed
LOC_Os02g40770	Allelic imprinted PEG	1		biallele	-3.33203	3.76113	7.92201	0.00488369	0.0951041	0.363636	0.329787	0	0		PEG	-3.7919	3.16658	15.464	8.40926e-05	0.00230498	0.139241	0.177914	0.011236	0		SET domain containing protein, expressed
LOC_Os02g41610	Locus-imprinted PEG	1		PEG	-4.58242	5.48035	70.5527	4.48133e-17	8.7375e-15	0.0694981	0.0544218	0.0185185	0.0268456		PEG	-5.44065	8.95612	224.788	8.16691e-51	1.14166e-47	0.0122822	0.0210741	0.0322041	0.0220843		expressed protein
LOC_Os02g44102	Allelic imprinted PEG	1		biallele	-1.05562	4.3149	3.54143	0.0598538	0.544645	0.390135	0.344828	0.360656	0.189189		PEG	-2.17271	4.20286	17.1856	3.39003e-05	0.0010044	0.268482	0.214286	0.125	0.113402		remorin C-terminal domain containing protein, putative, expressed
LOC_Os02g44290	Unclassified MEG	1		unknown	n.d.	n.d.	n.d.	n.d.	n.d.	n.d.	n.d.	n.d.	n.d.		MEG	5.93261	0.514954	10.7964	0.00101699	0.0152123	1	1	1	1		phosphatase, putative, expressed
LOC_Os02g45344	Allelic imprinted PEG	1		biallele	-2.43439	5.97051	22.2761	2.36121e-06	0.000108169	0.255814	0.319042	0.0491803	0.0958904		PEG	-1.53671	5.77938	15.2475	9.43016e-05	0.00256651	0.256771	0.231244	0.240602	0.267176		O-acyltransferase, putative, expressed
LOC_Os02g47340	Unclassified MEG	1		unknown	n.d.	n.d.	n.d.	n.d.	n.d.	n.d.	n.d.	n.d.	n.d.		MEG	8.10656	2.18311	28.6001	8.89775e-08	3.49925e-06	1	1	1	1		retrotransposon%20protein%2C%20putative%2C%20unclassified%2C%20expressed
LOC_Os02g48320	Allelic imprinted PEG	1		biallele	-0.557405	3.78319	0.196513	0.65755	1	0.777778	1	0.076087	0.141104		PEG	-3.32697	2.91892	12.5175	0.000403159	0.00922527	0.230769	0.166667	0.00826446	0.0526316		DNA binding protein, putative, expressed
LOC_Os02g49150	Allelic imprinted PEG	1		biallele	-1.86466	5.39031	12.8575	0.000336131	0.00973561	0.246637	0.0976431	0.227679	0.347305		PEG	-2.9089	4.6729	32.0904	1.4716e-08	7.18376e-07	0.167939	0.152047	0.0576271	0.0914286		RNA polymerase Rpb4, putative, expressed
LOC_Os02g50480	Allelic imprinted PEG	1		biallele	-1.83387	4.12611	5.85095	0.0155686	0.226695	0.140893	0.133333	0.157895	0.512195		PEG	-2.82403	4.24062	11.9801	0.000537707	0.0119831	0.0953846	0.0759494	0.241758	0		histidine kinase, putative, expressed
LOC_Os02g50860	Locus-imprinted PEG	1		PEG	-2.697	4.94417	20.4354	6.16786e-06	0.000264374	0.167568	0.0431034	0.153846	0.201413		PEG	-4.0885	6.61464	31.0527	2.51111e-08	1.18084e-06	0.0105581	0.0180392	0.117769	0.199675		ras-related protein, putative, expressed
LOC_Os02g51540	Locus-imprinted PEG	1		PEG	-4.49664	4.98855	25.4233	4.60335e-07	2.37414e-05	0.116981	0.184549	0.0107527	0		PEG	-5.32023	4.80194	49.3653	2.12468e-12	1.51959e-10	0.0731707	0.0245399	0.013986	0		eukaryotic aspartyl protease domain containing protein, expressed
LOC_Os02g51550	Locus-imprinted PEG	1		PEG	-5.48803	6.55804	121.437	3.0658e-28	1.69021e-25	0.0474777	0.0131108	0.0221187	0.00940439		PEG	-7.17299	7.25746	135.986	2.00961e-31	5.94264e-29	0.00460299	0.000544959	0.0241546	0.00465904		DUF581 domain containing protein, expressed
LOC_Os02g51850	Allelic imprinted PEG	1		biallele	-3.49535	4.57848	12.3963	0.000430185	0.0121186	0.403922	0.183333	0.0196078	0.00892857		PEG	-3.77019	4.42363	25.1844	5.21022e-07	2.07558e-05	0.131673	0.198758	0.025	0.0137931		OsAPRL3 adenosine 5'-phosphosulfate reductase-like OsAPRL3, expressed
LOC_Os02g51860	Locus-imprinted PEG	0.113473		PEG	-3.52022	5.01223	15.3635	8.86837e-05	0.00299762	0.278515	0.142857	0.0408922	0		PEG	-3.72234	4.67676	41.9471	9.37763e-11	5.81451e-09	0.0862069	0.149798	0.0353535	0.0343008		dehydration response related protein, putative, expressed
LOC_Os02g52630	Allelic imprinted MEG	1		biallele	5.10175	0.687105	4.88548	0.0270834	0.278822	1	NA	NA	1		MEG	5.82994	0.512829	9.62047	0.0019242	0.0256185	1	1	1	1		xyloglucan fucosyltransferase, putative, expressed
LOC_Os02g52920	Allelic imprinted PEG	1		biallele	-1.80294	5.82698	18.0873	2.11e-05	0.00082481	0.362683	0.230769	0.1274	0.199029		PEG	-2.88315	4.93368	34.9086	3.45553e-09	1.80734e-07	0.125	0.0818713	0.0821918	0.18705		emp24/gp25L/p24 family protein, putative, expressed
LOC_Os02g52960	Locus-imprinted PEG	1		PEG	-4.68536	8.36914	79.4477	4.95163e-19	1.20319e-16	0.12276	0.0475499	0.0210261	0.0102686		PEG	-5.75934	8.31793	249.849	2.80136e-56	7.17942e-53	0.0336307	0.0190848	0.014254	0.00785569		PHD-finger domain containing protein, putative, expressed
LOC_Os02g53740	Locus-imprinted PEG	1		PEG	-3.34738	6.03451	51.0281	9.10528e-13	1.01801e-10	0.130435	0.0387931	0.075188	0.108987		PEG	-3.78945	6.68613	53.1889	3.0296e-13	2.40135e-11	0.0645995	0.0176991	0.0508197	0.13406		XI-I, putative, expressed
LOC_Os02g56530	Allelic imprinted PEG	1		biallele	-2.95791	4.3367	9.06812	0.00260104	0.0583246	0.386555	0.323529	0.0394737	0		PEG	-4.66687	4.14998	41.0885	1.45489e-10	8.80783e-09	0.121569	0.0268456	0.0184049	0.00653595		ankyrin repeat domain containing protein, expressed
LOC_Os02g56880	Unclassified PEG	1		unknown	n.d.	n.d.	n.d.	n.d.	n.d.	n.d.	n.d.	n.d.	n.d.		PEG	-1.86126	5.65835	19.1052	1.23708e-05	0.000393842	0.210938	0.106838	0.258294	0.264182		transcriptional corepressor LEUNIG, putative, expressed
LOC_Os02g57080	Locus-imprinted PEG	1		PEG	-4.04645	5.56731	45.9202	1.23167e-11	1.15835e-09	0.167568	0.071161	0.00877193	0.0341463		PEG	-4.99988	5.8549	90.3013	2.04518e-21	3.20905e-19	0.0738423	0.0141509	0.0192926	0.0168919		serine/threonine-protein kinase, putative, expressed
LOC_Os02g57190	Allelic imprinted PEG	1		biallele	-3.95575	6.51595	28.977	7.32411e-08	4.22736e-06	0.340633	0.0811429	0.00977199	0.0180723		PEG	-4.82325	7.37078	141.353	1.34701e-32	4.22715e-30	0.0745247	0.0318677	0.0211132	0.0156863		Myosin head domain containing protein, expressed
LOC_Os02g57200	Allelic imprinted PEG	1		PEG	-4.2373	6.32476	37.3631	9.80579e-10	7.36033e-08	0.121784	0.144654	0.00294985	0.0260664		biallele	-1.65223	6.90395	7.5133	0.0061245	0.0947449	0.115217	0.0684161	0.417826	0.536446		expressed protein
LOC_Os02g57820	Unclassified PEG	1		unknown	n.d.	n.d.	n.d.	n.d.	n.d.	n.d.	n.d.	n.d.	n.d.		PEG	-4.21254	4.59544	59.4748	1.23871e-14	1.13379e-12	0.0338462	0.0479452	0.0655022	0.0504451		AT hook motif domain containing protein, expressed
LOC_Os03g03070	Locus-imprinted PEG	1		PEG	-8.41113	2.8801	30.9845	2.60101e-08	1.59329e-06	0	0	0	0		PEG	-5.06027	1.67689	12.7057	0.000364541	0.00844209	0.0877193	0	0	0		transcription factor, putative, expressed
LOC_Os03g03100	Allelic imprinted PEG	1		biallele	-0.912688	1.52951	0.304793	0.580893	1	0	0.466667	0	0.548387		PEG	-3.20371	2.17589	10.7615	0.00103636	0.0210795	0.0212766	0.0684932	0.121951	0.173913		OsMADS50 - MADS-box family gene with MIKCc type-box, expressed
LOC_Os03g03920	Allelic imprinted PEG	1		biallele	-1.26698	8.57769	14.7645	0.00012181	0.00398261	0.357191	0.323661	0.272011	0.219459		PEG	-1.77388	8.13897	51.1041	8.75956e-13	6.57052e-11	0.233142	0.226515	0.193146	0.215061		Ubiquitin family domain containing protein, expressed
LOC_Os03g04350	Allelic imprinted MEG	1		biallele	8.43845	3.0937	17.0765	3.59034e-05	0.0012987	1	1	NA	1		MEG	5.8974	3.98766	32.1586	1.4209e-08	6.2785e-07	1	0.89011	1	1		expressed protein
LOC_Os03g05800	Allelic imprinted MEG	1		biallele	1.67684	1.41955	0.882404	0.347544	0.970514	0	1	1	0.757576		MEG	6.59864	0.938482	13.9612	0.000186623	0.00353412	1	1	1	1		expressed protein
LOC_Os03g07080	Locus-imprinted PEG	1		PEG	-2.44647	6.11367	28.8625	7.77023e-08	4.46872e-06	0.196474	0.25	0.0526316	0.143564		PEG	-2.85544	6.07795	56.9534	4.46271e-14	3.74989e-12	0.171144	0.114488	0.075	0.103203		endonuclease/exonuclease/phosphatase family domain containing protein, expressed
LOC_Os03g07500	Unclassified MEG	1		unknown	n.d.	n.d.	n.d.	n.d.	n.d.	n.d.	n.d.	n.d.	n.d.		MEG	7.41107	1.69989	17.3045	3.18433e-05	0.000774771	1	1	1	1		hypothetical protein
LOC_Os03g12570	Allelic imprinted PEG	1		biallele	-2.15369	3.97105	5.0015	0.0253254	0.315345	0.131579	0.0225564	0.435484	0.383459		PEG	-2.07208	3.51007	10.2891	0.00133817	0.0262798	0.135135	0.253012	0.112676	0.201646		expressed protein
LOC_Os03g14290	Allelic imprinted PEG	1		biallele	-1.97419	4.33947	10.6474	0.00110225	0.0276218	0.310345	0.163842	0.0779221	0.282443		PEG	-3.36817	3.01267	15.7888	7.08191e-05	0.00197997	0.123288	0	0.0588235	0.120567		expressed protein
LOC_Os03g15010	Allelic imprinted PEG	1		biallele	-1.3043	6.05627	10.3229	0.00131391	0.0323182	0.276923	0.444444	0.268781	0.192079		PEG	-2.07382	6.44881	43.9263	3.40973e-11	2.19378e-09	0.208029	0.155769	0.176471	0.194682		transposon%20protein%2C%20putative%2C%20unclassified%2C%20expressed
LOC_Os03g15990	Locus-imprinted MEG	1		MEG	7.2051	4.47415	60.7544	6.46587e-15	1.04421e-12	1	1	0.954023	1		MEG	7.35241	4.74485	95.7312	1.31591e-22	2.27357e-20	0.986207	0.993846	1	1		EDM2, putative, expressed
LOC_Os03g16730	Locus-imprinted PEG	1		PEG	-2.50524	6.46727	32.8006	1.02111e-08	6.63356e-07	0.175043	0.0659537	0.166271	0.204406		PEG	-3.84254	5.33534	41.092	1.45233e-10	8.80783e-09	0.015015	0.0493274	0.0579495	0.154876		expressed protein
LOC_Os03g17980	Locus-imprinted PEG	1		PEG	-3.79426	7.8937	48.9956	2.56534e-12	2.59586e-10	0.230648	0.0616302	0.0281739	0.0288837		PEG	-3.67448	6.86348	86.661	1.28812e-20	1.86862e-18	0.12749	0.0984456	0.0374532	0.0431504		CAMK KIN1/SNF1/Nim1 like AMPKh.2 - CAMK includes calcium/calmodulin depedent protein kinases, expressed
LOC_Os03g18080	Allelic imprinted PEG	1		biallele	-2.59353	6.41817	32.4667	1.2125e-08	7.72332e-07	0.331719	0.116635	0.0621891	0.120968		PEG	-2.80238	6.44099	38.9467	4.35544e-10	2.53688e-08	0.0862944	0.0498442	0.193059	0.192362		SacI homology domain containing protein, expressed
LOC_Os03g19920	Locus-imprinted PEG	1		PEG	-4.65209	5.43237	34.0867	5.27106e-09	3.63249e-07	0.151515	0.00380228	0.011976	0.0196937		PEG	-7.5739	5.45294	148.057	4.60988e-34	1.68776e-31	0.00273973	0	0.00469484	0.00915033		expressed protein
LOC_Os03g20430	Locus-imprinted MEG	1		MEG	8.45631	3.06117	28.9543	7.41051e-08	4.48785e-06	1	1	1	1		MEG	9.46648	3.41263	59.8976	9.99246e-15	8.83069e-13	1	1	1	1		histone-lysine N-methyltransferase, H3 lysine-9 specific SUVH8, putative, expressed
LOC_Os03g21870	Unclassified MEG	1		unknown	n.d.	n.d.	n.d.	n.d.	n.d.	n.d.	n.d.	n.d.	n.d.		MEG	8.54731	4.36932	90.1499	2.20788e-21	3.6506e-19	1	1	0.987097	1		DUF623 domain containing protein, expressed
LOC_Os03g24900	Locus-imprinted PEG	1		PEG	-4.32903	4.76862	18.8523	1.4124e-05	0.000574594	0.256579	0.0909091	0	0.0107527		PEG	-4.4205	4.52707	57.9101	2.74377e-14	2.41091e-12	0.0344828	0.037594	0.07173	0.0289855		DHHC zinc finger domain containing protein, expressed
LOC_Os03g24910	Allelic imprinted PEG	1		biallele	-0.678915	5.05191	1.89544	0.16859	0.934472	0.51004	0.465649	0.319588	0.260638		PEG	-2.17858	4.59478	20.6143	5.6175e-06	0.000190685	0.173021	0.212121	0.158209	0.159091		nodulation protein-related, putative, expressed
LOC_Os03g25070	Locus-imprinted PEG	1		PEG	-3.74919	3.74856	13.311	0.000263856	0.00782657	0.28125	0.05	0.025974	0		PEG	-5.19478	5.94941	108.26	2.35755e-25	4.58887e-23	0.0546379	0.0275229	0.0212202	0.00623053		CAMK CAMK like.18 - CAMK includes calcium/calmodulin depedent protein kinases, expressed
LOC_Os03g25600	Allelic imprinted PEG	1		biallele	-0.695982	6.69957	3.07938	0.0792909	0.634168	0.424107	0.335121	0.368836	0.369565		PEG	-1.71096	6.01667	23.5566	1.21292e-06	4.6052e-05	0.297376	0.234783	0.138924	0.228283		protein phosphatase 2C, putative, expressed
LOC_Os03g27450	Locus-imprinted PEG	1		PEG	-6.10105	6.08313	18.8425	1.41971e-05	0.000574642	0.180778	0.0429448	0	0		PEG	-5.23861	6.52046	60.7882	6.3559e-15	5.88763e-13	0.0961263	0.0641248	0.00582524	0.00634006		ADP-ribosylation factor, putative, expressed
LOC_Os03g27460	Locus-imprinted PEG	1		PEG	-4.14075	6.09192	68.3171	1.39207e-16	2.47293e-14	0.104278	0.039501	0.0227273	0.0521542		PEG	-5.31528	6.10268	125.413	4.13384e-29	9.77939e-27	0.0460879	0.0151724	0.0155317	0.0166482		heat shock protein DnaJ, putative, expressed
LOC_Os03g29470	Locus-imprinted PEG	1		PEG	-4.42257	8.5344	49.7725	1.72648e-12	1.82801e-10	0.197158	0.0218341	0.012987	0.0242344		PEG	-3.29977	5.67699	54.7469	1.37096e-13	1.10373e-11	0.0700637	0.0866667	0.144092	0.0495315		transcription initiation factor IID, putative, expressed
LOC_Os03g30750	Unclassified MEG	1		unknown	n.d.	n.d.	n.d.	n.d.	n.d.	n.d.	n.d.	n.d.	n.d.		MEG	9.30061	3.27718	53.7334	2.2963e-13	1.77438e-11	1	1	1	1		hypothetical protein
LOC_Os03g31944	Allelic imprinted MEG	1		biallele	6.60506	1.87857	7.978	0.00473492	0.0813999	1	1	NA	NA		MEG	5.15694	4.37991	27.2138	1.82149e-07	6.86498e-06	0.91954	0.839416	1	1		expressed protein
LOC_Os03g32460	Locus-imprinted MEG	1		MEG	6.26837	4.27352	45.2249	1.75654e-11	1.75016e-09	1	0.966667	1	1		MEG	6.73202	4.74405	66.5155	3.47149e-16	3.53517e-14	0.988636	0.965753	1	1		retrotransposon%2C%20putative%2C%20centromere-specific%2C%20expressed
LOC_Os03g36790	Locus-imprinted PEG	1		PEG	-3.48288	5.94715	66.909	2.84327e-16	4.78508e-14	0.0831354	0.108312	0.0720268	0.0615942		PEG	-4.32237	5.67844	73.2253	1.15666e-17	1.36816e-15	0.103806	0.066092	0.0135135	0.03003		tobamovirus multiplication protein, putative, expressed
LOC_Os03g38610	Allelic imprinted MEG	1		MEG	3.16927	4.53477	12.5951	0.000386767	0.0104985	0.867868	0.894737	1	1		biallele	2.6355	4.26226	7.4852	0.0062208	0.0671751	0.570652	0.599068	1	1		OsMADS87 - MADS-box family gene with M-gamma type-box, expressed
LOC_Os03g38970	Allelic imprinted PEG	0.162456		biallele	-4.38588	5.09012	10.0826	0.00149675	0.0360393	0.368421	0.299213	0	0		PEG	-2.86319	6.3969	25.7964	3.79394e-07	1.5393e-05	0.297352	0.264925	0.0378378	0.0416667		metal ion binding protein, putative, expressed
LOC_Os03g42050	Allelic imprinted PEG	1		biallele	-1.93088	6.76692	22.8724	1.73118e-06	8.14061e-05	0.435958	0.191489	0.137856	0.139276		PEG	-2.01459	6.51055	33.0186	9.12818e-09	4.59658e-07	0.293447	0.25076	0.103387	0.156843		exportin-7-A, putative, expressed
LOC_Os03g42670	Unclassified MEG	1		unknown	n.d.	n.d.	n.d.	n.d.	n.d.	n.d.	n.d.	n.d.	n.d.		MEG	4.03903	2.14093	11.6569	0.00063966	0.010332	0.864407	0.9375	1	1		transposon%20protein%2C%20putative%2C%20unclassified%2C%20expressed
LOC_Os03g43890	Unclassified PEG	1		PEG	-3.70429	5.88671	33.8815	5.85731e-09	3.96808e-07	0.257143	0.0750605	0.0334572	0.015873		unknown	n.d.	n.d.	n.d.	n.d.	n.d.	n.d.	n.d.	n.d.	n.d.		WD domain, G-beta repeat domain containing protein, expressed
LOC_Os03g47686	Locus-imprinted PEG	1		PEG	-6.9385	5.73189	63.61	1.51655e-15	2.40065e-13	0	0	0.0232558	0.022508		PEG	-8.73265	4.36801	78.4814	8.07567e-19	1.03483e-16	0.0344828	0	0	0		ankyrin, putative, expressed
LOC_Os03g47693	Allelic imprinted PEG	1		biallele	-7.23031	2.58836	14.5152	0.00013903	0.00449053	NA	NA	0	0		PEG	-7.71002	1.7108	26.0497	3.32744e-07	1.3536e-05	0	0	0	0		ankyrin repeat family protein, putative, expressed
LOC_Os03g48810	Locus-imprinted MEG	1		MEG	3.07582	7.6381	26.6009	2.50133e-07	1.36489e-05	0.904573	0.982955	0.821772	0.866397		MEG	3.61415	6.74455	83.2378	7.27518e-20	1.017e-17	0.94487	0.957784	0.877475	0.87196		nucleobase-ascorbate transporter, putative, expressed
LOC_Os03g49770	Allelic imprinted PEG	1		PEG	-1.58528	5.8486	15.5795	7.91077e-05	0.00271994	0.263598	0.286364	0.237374	0.20915		biallele	-1.37894	5.16389	11.7581	0.000605799	0.0132698	0.223256	0.291429	0.256674	0.305857		oxysterol-binding protein, putative, expressed
LOC_Os03g50330	Unclassified PEG	1		PEG	-5.12275	6.20534	41.7012	1.06343e-10	9.19029e-09	0.142157	0.0229008	0.00952381	0.00389105		unknown	n.d.	n.d.	n.d.	n.d.	n.d.	n.d.	n.d.	n.d.	n.d.		CAMK KIN1/SNF1/Nim1 like.18 - CAMK includes calcium/calmodulin depedent protein kinases, expressed
LOC_Os03g51220	Allelic imprinted MEG	1		biallele	0.837463	6.53381	3.48358	0.0619807	0.462411	0.456847	0.611511	0.704641	0.717325		MEG	1.74918	6.91699	40.1738	2.32344e-10	1.34821e-08	0.727401	0.770347	0.714509	0.777605		SWI/SNF-related matrix-associated actin-dependent regulator of chromatin subfamily C member, putative, expressed
LOC_Os03g52594	Locus-imprinted PEG	1		PEG	-3.62551	7.35715	89.8657	2.54883e-21	7.99034e-19	0.0922099	0.0620253	0.0740203	0.0717797		PEG	-3.13941	6.42234	92.3105	7.40887e-22	1.28007e-19	0.112417	0.0895105	0.0972424	0.0904255		CCR4-NOT transcription factor, putative, expressed
LOC_Os03g52620	Allelic imprinted MEG	1		MEG	6.51839	1.45843	10.6401	0.00110662	0.0253614	1	1	1	1		biallele	1.14881	1.41581	1.1061	0.292931	0.859409	0.8	0.681818	0.5	1		expressed protein
LOC_Os03g53590	Unclassified MEG	1		MEG	6.85939	5.36522	76.6088	2.0841e-18	5.38857e-16	1	0.996337	1	0.949367		unknown	n.d.	n.d.	n.d.	n.d.	n.d.	n.d.	n.d.	n.d.	n.d.		expressed protein
LOC_Os03g53630	Unclassified PEG	1		PEG	-4.50626	7.08289	62.7948	2.29407e-15	3.53797e-13	0.135321	0.0369702	0.0319767	0.00801603		unknown	n.d.	n.d.	n.d.	n.d.	n.d.	n.d.	n.d.	n.d.	n.d.		PHD finger family protein, putative, expressed
LOC_Os03g54900	Locus-imprinted PEG	1		PEG	-4.22349	5.93033	37.6091	8.64424e-10	6.64443e-08	0.120996	0.10757	0.0380313	0		PEG	-3.56118	2.86836	15.9337	6.56004e-05	0.00184413	0.133333	0.116667	0.0526316	0		phytosulfokine receptor precursor, putative, expressed
LOC_Os03g54910	Unclassified PEG	1		PEG	-3.33051	7.89348	67.3294	2.29735e-16	3.90745e-14	0.0997991	0.0479087	0.117054	0.0984127		unknown	n.d.	n.d.	n.d.	n.d.	n.d.	n.d.	n.d.	n.d.	n.d.		X8 domain containing protein, expressed
LOC_Os03g55820	Allelic imprinted MEG	1		MEG	6.06575	1.15352	9.72554	0.00181725	0.0377817	1	1	1	1		biallele	-0.522364	0.903324	0.138952	0.709325	1	0.625	0.148936	0.555556	NA		thioredoxin, putative, expressed
LOC_Os03g56250	Locus-imprinted PEG	1		PEG	-4.43303	6.54581	75.7449	3.22789e-18	7.47935e-16	0.0221643	0.0343137	0.0736196	0.0558859		PEG	-3.35644	5.83771	31.3566	2.14725e-08	1.01595e-06	0.0541872	0.0164609	0.172249	0.17096		LRR receptor-like protein kinase, putative, expressed
LOC_Os03g56310	Locus-imprinted PEG	1		PEG	-3.14984	4.23843	18.7491	1.49097e-05	0.000601959	0.205128	0.033557	0.165829	0.0440252		PEG	-1.55513	4.93252	11.5159	0.000690041	0.0147167	0.266932	0.160784	0.267703	0.287599		5-nucleotidase domain-containing protein, putative, expressed
LOC_Os03g58130	Locus-imprinted PEG	1		PEG	-4.44945	7.51353	44.3442	2.7543e-11	2.4879e-09	0.181303	0.0856742	0.0201258	0.0047138		PEG	-5.24217	6.03929	39.1796	3.86558e-10	2.26874e-08	0.105012	0.0842697	0.00798176	0		thioredoxin, putative, expressed
LOC_Os03g59740	Unclassified PEG	1		PEG	-4.7037	8.04589	38.673	5.0109e-10	3.98578e-08	0.180828	0.0676203	0.00370828	0.0144928		unknown	n.d.	n.d.	n.d.	n.d.	n.d.	n.d.	n.d.	n.d.	n.d.		ADP-ribosylation factor, putative, expressed
LOC_Os03g60120	Unclassified PEG	1		unknown	n.d.	n.d.	n.d.	n.d.	n.d.	n.d.	n.d.	n.d.	n.d.		PEG	-3.3129	5.01697	26.6433	2.44699e-07	1.00878e-05	0.241623	0.137931	0.0228311	0.037464		AP2 domain containing protein, expressed
LOC_Os03g60130	Locus-imprinted PEG	1		PEG	-3.09642	7.54312	30.4304	3.4606e-08	2.08785e-06	0.091801	0.0248262	0.186326	0.148696		PEG	-4.40332	7.19878	128.042	1.09886e-29	2.68209e-27	0.0418964	0.0252619	0.0318134	0.0750129		transcription elongation factor protein, putative, expressed
LOC_Os03g60150	Locus-imprinted PEG	0.25563		PEG	-3.38545	3.89939	13.5878	0.000227656	0.00693289	0.265306	0.0133333	0.17037	0.00492611		PEG	-4.53455	3.73958	30.6655	3.06573e-08	1.41567e-06	0.0542636	0.008	0.00571429	0.0776256		protein kinase domain containing protein, expressed
LOC_Os03g60710	Locus-imprinted PEG	1		PEG	-4.43862	8.79434	72.685	1.52089e-17	3.19946e-15	0.0445645	0.0180807	0.0705332	0.0378639		PEG	-4.18659	7.36173	158.209	2.78637e-36	1.26018e-33	0.0488959	0.0838482	0.0282042	0.0459966		protein kinase domain containing protein, expressed
LOC_Os03g60810	Allelic imprinted MEG	1		biallele	-1.10796	1.81799	0.272236	0.601835	1	0.690141	1	NA	0.0434783		MEG	6.3968	0.871421	12.7485	0.000356285	0.00624698	1	1	1	1		lectin-like receptor kinase, putative, expressed
LOC_Os03g61070	Allelic imprinted MEG	1		biallele	-0.10716	3.89113	0.0254467	0.873259	1	0.71831	0.463415	0.336493	0.382716		MEG	4.27955	1.11727	9.15985	0.00247383	0.0317097	1	1	0.826087	1		expressed protein
LOC_Os03g61120	Allelic imprinted PEG	1		biallele	-1.25975	4.62383	3.36935	0.06642	0.576819	0.662651	0.379747	0.186047	0.111111		PEG	-2.13437	5.59578	18.5666	1.64072e-05	0.000512377	0.216931	0.237952	0.175824	0.0611247		anthranilate synthase component I-1, chloroplast precursor, putative, expressed
LOC_Os03g63040	Allelic imprinted PEG	1		biallele	-1.76462	5.28388	5.59231	0.0180395	0.25036	0.534442	0.42522	0.0148148	0.148594		PEG	-1.49618	5.75185	17.2271	3.31677e-05	0.000986498	0.278409	0.271624	0.276471	0.173242		expressed protein
LOC_Os03g63770	Allelic imprinted PEG	0.244441		biallele	-2.97978	2.64651	4.96194	0.0259111	0.32064	0.225	0	0.107143	0		PEG	-3.95568	7.16228	146.987	7.89845e-34	2.69899e-31	0.0901583	0.0520314	0.0503282	0.0417741		RCD1, putative, expressed
LOC_Os04g05010	Allelic imprinted PEG	1		biallele	-0.898228	7.77341	5.11175	0.0237644	0.300793	0.42706	0.469388	0.284211	0.258246		PEG	-1.75748	6.68884	30.3781	3.55518e-08	1.61493e-06	0.298487	0.196364	0.177044	0.200632		CBS domain containing membrane protein, putative, expressed
LOC_Os04g05030	Locus-imprinted PEG	1		PEG	-2.56255	6.18226	30.5663	3.22653e-08	1.95401e-06	0.18797	0.0705882	0.108696	0.206504		PEG	-3.81789	5.63262	91.486	1.12387e-21	1.83848e-19	0.0756579	0.0680628	0.0496894	0.0599676		serine-rich 25 kDa antigen protein, putative, expressed
LOC_Os04g06770	Locus-imprinted PEG	1		PEG	-2.52707	6.92137	36.9404	1.21795e-09	9.05702e-08	0.214939	0.0871003	0.130612	0.148459		PEG	-2.94349	7.13687	78.8952	6.54922e-19	8.4628e-17	0.102816	0.0807018	0.0981941	0.155637		argonaute, putative, expressed
LOC_Os04g08034	Locus-imprinted MEG	1		MEG	2.16664	6.30932	20.1656	7.10175e-06	0.000301174	0.8464	0.762999	0.903061	0.742754		MEG	2.05597	6.69023	23.7395	1.10297e-06	3.54079e-05	0.720395	0.71711	0.78831	0.917031		ZOS4-02 - C2H2 zinc finger protein, expressed
LOC_Os04g08470	Locus-imprinted PEG	1		PEG	-6.17102	5.88354	57.4096	3.53875e-14	4.7148e-12	0.0708661	0	0.0192719	0		PEG	-10.7585	4.62591	133.916	5.70019e-31	1.65381e-28	0	0	0	0		OsFBX116 - F-box domain containing protein, expressed
LOC_Os04g08570	Locus-imprinted MEG	1		MEG	9.46055	7.19174	238.38	8.87116e-54	2.83664e-50	1	0.996012	1	0.99817		MEG	7.43928	6.2318	204.735	1.93439e-46	1.41644e-43	0.989518	0.993203	1	0.993311		uncharacterized PE-PGRS family protein PE PGRS20, putative, expressed
LOC_Os04g10260	Locus-imprinted MEG	1		MEG	8.86775	7.50147	267.914	3.23282e-60	5.16864e-56	1	0.996113	0.997484	0.997085		MEG	6.91762	7.06641	123.28	1.21085e-28	2.77898e-26	0.98739	0.965167	0.998504	0.998805		basic region leucine zipper domain containing protein, expressed
LOC_Os04g10680	Allelic imprinted PEG	1		biallele	-0.752099	5.35183	2.54198	0.110856	0.772567	0.398876	0.255814	0.404959	0.437288		PEG	-1.51778	7.81947	38.1747	6.46872e-10	3.69775e-08	0.27633	0.252468	0.254012	0.21472		zinc finger, C3HC4 type domain containing protein, expressed
LOC_Os04g11730	Locus-imprinted MEG	1		MEG	3.23941	5.49393	18.4803	1.71665e-05	0.000671047	0.865285	0.748072	1	1		MEG	3.679	5.71127	55.0403	1.18082e-13	9.45705e-12	0.875122	0.916399	0.891304	1		methyl-CpG binding domain containing protein, expressed
LOC_Os04g12540	Allelic imprinted MEG	1		MEG	5.04155	2.28876	11.7969	0.000593291	0.0150564	1	1	0.902439	1		biallele	0.756424	3.62553	1.15639	0.282216	0.847294	0.813472	0.723757	0.442857	0.285714		receptor-like protein kinase, putative, expressed
LOC_Os04g17700	Allelic imprinted PEG	1		PEG	-2.00581	4.78924	12.5695	0.0003921	0.0111348	0.291005	0.206612	0.0859375	0.205212		biallele	-1.84753	4.31514	9.10975	0.0025425	0.0448349	0.430168	0.330097	0.111111	0.0888031		kinesin heavy chain isolog, putative, expressed
LOC_Os04g20774	Locus-imprinted PEG	1		PEG	-3.86692	6.39728	70.8914	3.77435e-17	7.44991e-15	0.0824176	0.0948276	0.0604255	0.0277778		PEG	-4.5889	5.4193	63.3895	1.69624e-15	1.68278e-13	0.0473373	0.0138889	0.0180624	0.0727023		pumilio-family RNA binding repeat containing protein, expressed
LOC_Os04g22130	Locus-imprinted MEG	1		MEG	8.39671	3.00567	29.7457	4.92608e-08	3.08856e-06	1	1	1	1		MEG	3.58781	2.56944	11.6915	0.00062785	0.0101626	0.87013	0.769231	1	1		conserved hypothetical protein
LOC_Os04g22240	Locus-imprinted PEG	1		PEG	-4.92109	6.65662	106.746	5.05968e-25	2.31126e-22	0.0294118	0.0397112	0.0279938	0.0248566		PEG	-5.23532	7.62432	62.3596	2.8613e-15	2.74989e-13	0.0147783	0.00439754	0.0340633	0.0667661		zinc finger, C3HC4 type domain containing protein, expressed
LOC_Os04g25190	Allelic imprinted MEG	1		MEG	4.28552	3.15222	10.7497	0.00104299	0.0242022	0.818182	1	1	1		biallele	3.50908	2.2404	6.52073	0.0106625	0.104033	1	1	0.789474	0.622642		pollen allergen, putative, expressed
LOC_Os04g25870	Locus-imprinted MEG	1		MEG	5.15436	5.27201	24.9755	5.80643e-07	2.97542e-05	0.963678	1	1	1		MEG	7.76852	1.94508	20.9682	4.66961e-06	0.000133693	1	1	1	1		OsMADS84 - MADS-box family gene with M-gamma type-box, expressed
LOC_Os04g28120	Unclassified MEG	1		unknown	n.d.	n.d.	n.d.	n.d.	n.d.	n.d.	n.d.	n.d.	n.d.		MEG	3.30957	8.72824	45.1973	1.78148e-11	1.13667e-09	0.845714	0.803163	0.940316	0.941859		response regulator receiver domain containing protein, expressed
LOC_Os04g31160	Locus-imprinted PEG	1		PEG	-4.66482	3.55361	9.97684	0.00158522	0.0378276	0	0	0.137255	0.255814		PEG	-7.4232	4.99363	58.5213	2.01098e-14	1.81899e-12	0	0	0	0.0358974		hypothetical protein
LOC_Os04g31170	Locus-imprinted PEG	1		PEG	-5.71341	8.15001	141.886	1.03004e-32	8.23412e-30	0.043108	0.028413	0.007677	0.0110922		PEG	-6.33784	8.88156	130.992	2.48601e-30	6.47922e-28	0.0361775	0.0227914	0.00412567	0.00406688		expressed protein
LOC_Os04g32880	Locus-imprinted PEG	1		PEG	-4.89909	7.02222	51.2686	8.05552e-13	9.06984e-11	0.131606	0.0836653	0.00925926	0.00586756		PEG	-3.48306	6.68045	68.287	1.41349e-16	1.59818e-14	0.0571185	0.051756	0.0651828	0.145847		CBS domain containing membrane protein, putative, expressed
LOC_Os04g32890	Unclassified MEG	1		unknown	n.d.	n.d.	n.d.	n.d.	n.d.	n.d.	n.d.	n.d.	n.d.		MEG	8.37757	2.44278	32.3618	1.2798e-08	5.72077e-07	1	1	1	1		retrotransposon%20protein%2C%20putative%2C%20unclassified%2C%20expressed
LOC_Os04g32970	Locus-imprinted PEG	1		PEG	-3.86931	3.80091	17.0036	3.73084e-05	0.00138325	0.256637	0.0619469	0	0.05		PEG	-4.1653	3.50426	29.2158	6.47484e-08	2.86102e-06	0.0700637	0.0609756	0.0909091	0		OTU-like cysteine protease family protein, putative, expressed
LOC_Os04g33560	Unclassified MEG	1		MEG	7.0547	1.88299	12.8008	0.000346473	0.00953426	1	1	1	1		unknown	n.d.	n.d.	n.d.	n.d.	n.d.	n.d.	n.d.	n.d.	n.d.		expressed protein
LOC_Os04g33760	Locus-imprinted MEG	1		MEG	4.56373	2.12723	9.24858	0.00235678	0.0466999	1	0.714286	1	0.894737		MEG	2.6185	2.83784	9.38672	0.00218563	0.0286029	0.735849	0.777778	0.828571	0.933333		DUF584 domain containing protein, putative, expressed
LOC_Os04g34440	Allelic imprinted PEG	1		biallele	-2.49038	4.40349	3.7879	0.0516243	0.500527	0.0357143	0.0120482	0.264151	0.682759		PEG	-4.58737	4.51179	14.677	0.000127591	0.00334454	0.00377358	0	0.265306	0.141956		ubiquitin interaction motif-containing protein, putative, expressed
LOC_Os04g35000	Unclassified MEG	1		MEG	4.02368	7.89254	121.975	2.33803e-28	1.33502e-25	0.95389	0.931129	0.9174	0.942478		unknown	n.d.	n.d.	n.d.	n.d.	n.d.	n.d.	n.d.	n.d.	n.d.		expressed protein
LOC_Os04g36620	Locus-imprinted PEG	1		PEG	-3.00835	6.06181	26.2231	3.0416e-07	1.58401e-05	0.259429	0.255079	0.0511628	0.027027		PEG	-2.646	5.49996	33.4979	7.13396e-09	3.63241e-07	0.23689	0.198218	0.078853	0.0704648		hydrolase, alpha/beta fold family domain containing protein, expressed
LOC_Os04g38525	Locus-imprinted MEG	1		MEG	11.3054	5.77672	149.677	2.03939e-34	1.81143e-31	1	1	1	1		MEG	8.97537	4.76104	107.806	2.96401e-25	5.62685e-23	1	1	1	0.995816		expressed protein
LOC_Os04g39560	Locus-imprinted MEG	1		MEG	2.39196	7.51339	34.1348	5.14243e-09	3.75421e-07	0.780935	0.811573	0.921075	0.797214		MEG	2.42618	7.63717	56.9018	4.58133e-14	3.76723e-12	0.76414	0.773585	0.856876	0.892308		expressed protein
LOC_Os04g40660	Locus-imprinted PEG	1		PEG	-4.48755	7.57935	60.4087	7.70713e-15	1.1101e-12	0.114809	0.0687023	0.0110339	0.0250123		PEG	-6.8091	6.64132	255.893	1.34815e-57	5.18262e-54	0.00590319	0.00561798	0.00976801	0.0102975		MA3 domain containing protein, expressed
LOC_Os04g41110	Unclassified PEG	1		PEG	-1.86173	5.54524	16.6807	4.42279e-05	0.00161442	0.215447	0.254833	0.164835	0.225806		unknown	n.d.	n.d.	n.d.	n.d.	n.d.	n.d.	n.d.	n.d.	n.d.		Rad21 / Rec8 like protein, putative, expressed
LOC_Os04g41470	Locus-imprinted PEG	1		PEG	-4.49223	6.16951	34.6652	3.91576e-09	2.74584e-07	0.189627	0.0801187	0.0125174	0.00600601		PEG	-5.88196	6.57618	61.9981	3.43789e-15	3.26324e-13	0.0662177	0.0284091	0.000786782	0.00641711		expressed protein
LOC_Os04g41620	Allelic imprinted MEG	1		biallele	6.35938	1.34782	6.1426	0.0131963	0.173648	1	NA	NA	1		MEG	7.1527	1.38479	12.8779	0.000332478	0.00586297	1	1	1	1		CHIT2 - Chitinase family protein precursor, expressed
LOC_Os04g42230	Locus-imprinted PEG	1		PEG	-7.39409	3.74237	44.9251	2.04722e-11	1.88109e-09	0	0.0126582	0	0		PEG	-9.86637	3.74493	65.4184	6.05701e-16	6.29316e-14	0	0	0	0		expressed protein
LOC_Os04g42250	Locus-imprinted PEG	1		PEG	-4.56561	6.47246	94.2759	2.74471e-22	9.75164e-20	0.0844156	0.0396717	0.026694	0.0225352		PEG	-4.06512	5.70016	73.7699	8.77769e-18	1.04631e-15	0.103236	0.0266041	0.0604982	0.0307263		transferase family protein, putative, expressed
LOC_Os04g42260	Locus-imprinted PEG	1		PEG	-9.44649	3.87729	59.6244	1.14802e-14	1.61005e-12	0	0	0	0		PEG	-7.60337	5.93926	192.939	7.25681e-44	4.85165e-41	0.0013459	0.00772798	0.00822562	0.00126422		protein phosphatase 2C, putative, expressed
LOC_Os04g42600	Unclassified PEG	1		PEG	-5.90149	3.39086	27.3063	1.73649e-07	9.31642e-06	0.09375	0.00869565	0	0		unknown	n.d.	n.d.	n.d.	n.d.	n.d.	n.d.	n.d.	n.d.	n.d.		polyadenylate-binding protein, putative, expressed
LOC_Os04g42634	Allelic imprinted PEG	1		PEG	-4.17291	4.29307	25.3655	4.74327e-07	2.43844e-05	0	0.192982	0.0357143	0.0561798		biallele	1.82674	0.806888	0.560785	0.453944	1	1	1	0.365854	NA		expressed protein
LOC_Os04g44710	Unclassified PEG	1		PEG	-5.83259	6.88601	75.4639	3.72157e-18	8.38034e-16	0.0609555	0.0347222	0.00111732	0.00712589		unknown	n.d.	n.d.	n.d.	n.d.	n.d.	n.d.	n.d.	n.d.	n.d.		double-stranded RNA binding motif containing protein, expressed
LOC_Os04g46020	Allelic imprinted PEG	1		biallele	-1.17244	3.43269	1.4757	0.224449	1	0.773585	0.291339	0.444444	0.0140845		PEG	-2.5714	4.32423	20.4723	6.04995e-06	0.000204462	0.223796	0.144231	0.117021	0.0748899		GATA zinc finger domain containing protein, expressed
LOC_Os04g46450	Locus-imprinted PEG	1		PEG	-3.49496	7.70673	45.193	1.78546e-11	1.65005e-09	0.0937348	0.0195531	0.105169	0.114024		PEG	-2.75374	7.54574	39.9843	2.5601e-10	1.5141e-08	0.100597	0.0410013	0.171116	0.241913		zinc finger, C3HC4 type domain containing protein, expressed
LOC_Os04g47760	Allelic imprinted MEG	1		biallele	9.16338	3.86041	31.9731	1.56323e-08	1.05902e-06	1	1	NA	1		MEG	4.06109	2.50887	11.44	0.0007188	0.0114013	0.854545	1	0.940594	1		transposon%20protein%2C%20putative%2C%20Pong%20sub-class%2C%20expressed
LOC_Os04g48240	Unclassified MEG	1		unknown	n.d.	n.d.	n.d.	n.d.	n.d.	n.d.	n.d.	n.d.	n.d.		MEG	7.21329	1.49374	14.9627	0.000109656	0.00223039	1	1	1	1		retrotransposon%20protein%2C%20putative%2C%20unclassified%2C%20expressed
LOC_Os04g49410	Unclassified PEG	1		unknown	n.d.	n.d.	n.d.	n.d.	n.d.	n.d.	n.d.	n.d.	n.d.		PEG	-7.35099	1.50862	18.8221	1.43491e-05	0.000453073	0	0	0	0		expansin precursor, putative, expressed
LOC_Os04g51380	Unclassified PEG	1		PEG	-5.2443	3.22406	21.9125	2.85369e-06	0.000128884	0.0833333	0	0.0566038	0		unknown	n.d.	n.d.	n.d.	n.d.	n.d.	n.d.	n.d.	n.d.	n.d.		protein-S-isoprenylcysteine O-methyltransferase. tax, putative, expressed
LOC_Os04g51786	Unclassified MEG	1		MEG	6.66228	1.56317	10.8733	0.00097561	0.0229046	1	1	1	1		unknown	n.d.	n.d.	n.d.	n.d.	n.d.	n.d.	n.d.	n.d.	n.d.		containing DUF163, putative, expressed
LOC_Os04g52220	Unclassified MEG	1		unknown	n.d.	n.d.	n.d.	n.d.	n.d.	n.d.	n.d.	n.d.	n.d.		MEG	6.59843	1.01246	12.6366	0.000378277	0.00654305	1	1	1	1		expressed protein
LOC_Os04g53740	Unclassified PEG	1		unknown	n.d.	n.d.	n.d.	n.d.	n.d.	n.d.	n.d.	n.d.	n.d.		PEG	-2.32307	2.87032	10.1517	0.00144169	0.0279909	0.173077	0.209302	0.111111	0.15		thioredoxin, putative, expressed
LOC_Os04g57640	Unclassified PEG	1		unknown	n.d.	n.d.	n.d.	n.d.	n.d.	n.d.	n.d.	n.d.	n.d.		PEG	-3.4304	7.65365	132.747	1.0272e-30	2.87187e-28	0.0811825	0.0607477	0.0825409	0.09967		RCD1, putative, expressed
LOC_Os04g58610	Allelic imprinted MEG	1		biallele	1.1599	3.79552	2.62344	0.105296	0.618157	0.875	0.818182	0.452991	0.462069		MEG	3.07824	2.86438	12.6587	0.000373828	0.00649531	0.821429	0.813333	1	0.935484		retrotransposon%20protein%2C%20putative%2C%20unclassified%2C%20expressed
LOC_Os04g58750	Locus-imprinted PEG	1		PEG	-3.10833	3.98235	13.016	0.000308833	0.00904327	0.155556	0.0857143	0	0.103448		PEG	-3.60306	3.76076	19.3061	1.11349e-05	0.000358391	0.166667	0.0992366	0.068323	0		protein kinase family protein, putative, expressed
LOC_Os04g59394	Unclassified PEG	1		unknown	n.d.	n.d.	n.d.	n.d.	n.d.	n.d.	n.d.	n.d.	n.d.		PEG	-2.86286	4.45936	24.6146	7.00188e-07	2.73964e-05	0.0694087	0.102473	0.100775	0.264706		expressed protein
LOC_Os04g59400	Unclassified PEG	1		unknown	n.d.	n.d.	n.d.	n.d.	n.d.	n.d.	n.d.	n.d.	n.d.		PEG	-2.86188	4.13449	28.3016	1.0381e-07	4.47139e-06	0.134694	0.170306	0.0920245	0.078341		expressed protein
LOC_Os05g01020	Allelic imprinted PEG	1		biallele	-1.56611	8.27803	21.1643	4.21542e-06	0.000184142	0.351419	0.273063	0.149886	0.241429		PEG	-1.58485	7.55042	37.2147	1.05814e-09	5.87934e-08	0.282348	0.290416	0.203072	0.196047		transcriptional repressor, putative, expressed
LOC_Os05g01210	Allelic imprinted PEG	1		biallele	-4.03153	3.93118	6.14469	0.0131807	0.200507	0.529412	0.323077	0	0		PEG	-3.50073	3.58447	11.8692	0.000570691	0.0126266	0.241379	0.284404	0.0322581	0		expressed protein
LOC_Os05g01444	Unclassified MEG	1		unknown	n.d.	n.d.	n.d.	n.d.	n.d.	n.d.	n.d.	n.d.	n.d.		MEG	6.87022	1.19691	15.3318	9.01867e-05	0.00188424	1	1	1	1		polygalacturonase inhibitor precursor, putative, expressed
LOC_Os05g01710	Allelic imprinted PEG	1		biallele	-1.42669	7.09167	16.8762	3.98984e-05	0.00146643	0.383636	0.312381	0.200341	0.203756		PEG	-2.06644	6.03683	32.6819	1.08542e-08	5.41901e-07	0.153591	0.140759	0.186312	0.277213		transcription initiation factor IIA gamma chain, putative, expressed
LOC_Os05g03630	Locus-imprinted PEG	1		PEG	-4.83666	5.02871	30.3675	3.5747e-08	2.14858e-06	0.12973	0.112329	0	0		PEG	-5.51419	4.08003	37.2129	1.0591e-09	5.87934e-08	0.0761905	0.0447761	0.00325733	0		dnaJ domain containing protein, expressed
LOC_Os05g04330	Locus-imprinted PEG	1		PEG	-4.13497	5.34782	28.5553	9.10596e-08	5.14439e-06	0.234409	0.0425532	0.00369004	0.0294118		PEG	-4.00339	5.52632	46.7623	8.01397e-12	5.31167e-10	0.0437018	0.0177134	0.0520833	0.127349		DNA methyltransferase protein, putative, expressed
LOC_Os05g05230	Allelic imprinted PEG	1		biallele	-0.837704	7.06712	5.665	0.0173067	0.242294	0.413333	0.352362	0.344673	0.305699		PEG	-1.20353	6.92023	19.7538	8.80848e-06	0.000288802	0.296476	0.298423	0.290226	0.281481		expressed protein
LOC_Os05g05390	Allelic imprinted PEG	1		biallele	-2.20557	2.62804	5.19223	0.0226881	0.290655	0.129032	0.213115	0.12	0.212121		PEG	-4.67031	3.08401	24.7572	6.50271e-07	2.5639e-05	0.0977444	0.0340909	0.0588235	0		expressed protein
LOC_Os05g05660	Locus-imprinted MEG	1		MEG	2.57306	7.7471	48.1699	3.90834e-12	4.46332e-10	0.824529	0.784689	0.891496	0.865185		MEG	2.91274	6.69124	71.1763	3.26696e-17	3.6403e-15	0.842342	0.845643	0.917387	0.868705		PWWP domain containing protein, expressed
LOC_Os05g05780	Locus-imprinted PEG	1		PEG	-2.99461	8.03129	68.7912	1.09463e-16	1.98874e-14	0.144615	0.0749263	0.110246	0.113317		PEG	-3.15953	8.2214	121.728	2.64805e-28	6.07747e-26	0.0878342	0.0925159	0.0767974	0.126663		chromatin-remodeling complex ATPase chain, putative, expressed
LOC_Os05g05800	Allelic imprinted PEG	0.217653		biallele	-1.62556	3.45617	3.12003	0.0773352	0.627213	0.828571	0.3	0.113208	0.135135		PEG	-3.21005	2.41393	10.6812	0.00108231	0.0219271	0.275862	0.0769231	0.0724638	0		OsFBL21 - F-box domain and LRR containing protein, expressed
LOC_Os05g07720	Unclassified PEG	1		PEG	-4.50945	6.40274	52.6534	3.97929e-13	4.64386e-11	0.127928	0.0989583	0.00743889	0.0187354		unknown	n.d.	n.d.	n.d.	n.d.	n.d.	n.d.	n.d.	n.d.	n.d.		alliin lyase precursor, putative, expressed
LOC_Os05g08840	Locus-imprinted PEG	1		PEG	-2.93681	9.50062	62.1495	3.18349e-15	4.80166e-13	0.153574	0.170118	0.0758621	0.077688		PEG	-2.45261	9.40005	87.5193	8.34605e-21	1.22226e-18	0.141237	0.156929	0.1456	0.14515		DnaK family protein, putative, expressed
LOC_Os05g09620	Allelic imprinted PEG	1		biallele	-1.56372	7.27288	17.9247	2.29814e-05	0.000889655	0.245924	0.196182	0.254029	0.30801		PEG	-2.294	6.60326	40.2925	2.18649e-10	1.30317e-08	0.17303	0.0857143	0.185325	0.215149		SCC3, putative, expressed
LOC_Os05g11140	Locus-imprinted PEG	1		PEG	-3.78343	4.47091	15.9253	6.58935e-05	0.00230526	0.236994	0.222222	0.0299401	0		PEG	-4.6067	4.80962	38.2309	6.28486e-10	3.60606e-08	0.062069	0.101695	0.026694	0		CK1 CaseinKinase 1a.5 - CK1 includes the casein kinase 1 kinases, expressed
LOC_Os05g12460	Allelic imprinted PEG	1		biallele	-0.893454	3.07085	0.749843	0.386526	1	0.272727	0.12	0.52381	0.555556		PEG	-4.559	1.86205	13.1193	0.000292272	0.00694631	0.155556	0.010101	0	0		expressed protein
LOC_Os05g13940	Allelic imprinted MEG	1		biallele	3.72153	2.78145	8.96509	0.00275188	0.0532007	1	0.933333	0.555556	1		MEG	3.33677	2.89721	14.9431	0.000110801	0.00224775	0.918033	0.777778	0.87234	1		retrotransposon%20protein%2C%20putative%2C%20unclassified%2C%20expressed
LOC_Os05g14440	Unclassified MEG	1		unknown	n.d.	n.d.	n.d.	n.d.	n.d.	n.d.	n.d.	n.d.	n.d.		MEG	7.9348	2.02707	23.0551	1.57426e-06	4.89038e-05	1	1	1	1		transposon%20protein%2C%20putative%2C%20Ac%2FDs%20sub-class%2C%20expressed
LOC_Os05g16140	Unclassified PEG	1		PEG	-3.48261	3.07131	10.5955	0.00113362	0.0282751	0.25	0.142857	0	0.0731707		unknown	n.d.	n.d.	n.d.	n.d.	n.d.	n.d.	n.d.	n.d.	n.d.		expressed protein
LOC_Os05g23420	Unclassified PEG	1		PEG	-3.68431	4.07722	22.1231	2.55716e-06	0.000116478	0.164835	0.12	0.0103093	0.0752688		unknown	n.d.	n.d.	n.d.	n.d.	n.d.	n.d.	n.d.	n.d.	n.d.		sugar porter, putative, expressed
LOC_Os05g23910	Allelic imprinted MEG	1		MEG	4.81274	8.1079	53.6705	2.371e-13	3.15896e-11	1	1	0.946312	0.923745		biallele	3.40568	4.67347	1.01696	0.313242	0.873792	0	NA	0.994366	1		histone-like transcription factor and archaeal histone, putative, expressed
LOC_Os05g23950	Locus-imprinted MEG	1		MEG	8.22234	2.85466	26.9817	2.05395e-07	1.13792e-05	1	1	1	1		MEG	9.22907	3.18961	53.5495	2.52156e-13	1.92905e-11	1	1	1	1		TRAF-type zinc finger family protein, expressed
LOC_Os05g24000	Unclassified PEG	1		unknown	n.d.	n.d.	n.d.	n.d.	n.d.	n.d.	n.d.	n.d.	n.d.		PEG	-5.47132	4.70678	70.3212	5.03924e-17	5.78271e-15	0.0117096	0.0410095	0.037037	0.00311526		expressed protein
LOC_Os05g24340	Allelic imprinted MEG	1		biallele	6.46307	1.76901	7.59594	0.00584999	0.0960264	1	1	NA	NA		MEG	8.55964	2.62037	34.8063	3.64188e-09	1.77219e-07	1	1	1	1		transposon%20protein%2C%20putative%2C%20CACTA%2C%20En%2FSpm%20sub-class%2C%20expressed
LOC_Os05g26032	Allelic imprinted MEG	1		MEG	6.38653	1.39651	10.8984	0.000962453	0.0227629	1	1	1	1		biallele	0.932561	1.15227	0.677566	0.410426	0.939266	0.583333	0.818182	0.125	0.866667		expressed protein
LOC_Os05g26040	Locus-imprinted MEG	1		MEG	4.66763	8.05829	105.105	1.1585e-24	5.29201e-22	0.991117	0.942731	0.938166	0.945327		MEG	4.97779	8.15946	243.754	5.97357e-55	9.18557e-52	0.978735	0.975617	0.937893	0.959834		pumilio-family RNA binding repeat containing protein, expressed
LOC_Os05g26110	Allelic imprinted MEG	1		biallele	5.58227	5.92989	11.0977	0.00086436	0.0209068	1	0.578947	1	1		MEG	5.12944	4.83348	30.2467	3.80445e-08	1.5897e-06	0.925926	0.851163	1	0.994859		transposon%20protein%2C%20putative%2C%20Mutator%20sub-class%2C%20expressed
LOC_Os05g27920	Allelic imprinted PEG	1		biallele	-1.13108	3.82662	2.47226	0.115871	0.794402	0.636364	0.217391	0.471264	0.158537		PEG	-2.2012	4.64126	18.826	1.43202e-05	0.000453073	0.134545	0.131707	0.164286	0.273469		phox domain-containing protein, putative, expressed
LOC_Os05g28180	Locus-imprinted PEG	1		PEG	-3.96463	5.05615	41.0898	1.45395e-10	1.22994e-08	0.112903	0.105882	0.0412698	0.0124481		PEG	-4.67321	4.248	33.0849	8.82207e-09	4.4624e-07	0.0861423	0.028169	0.032491	0		AMP deaminase, putative, expressed
LOC_Os05g28440	Locus-imprinted PEG	1		PEG	-5.51919	6.24829	11.0292	0.000896871	0.0230533	0	0	0.25	0.15566		PEG	-7.475	5.28852	142.482	7.6307e-33	2.55081e-30	0.00424328	0.012987	0	0.0031348		expressed protein
LOC_Os05g28860	Unclassified PEG	1		PEG	-4.51463	4.15605	24.1155	9.07274e-07	4.47701e-05	0.151163	0.0169492	0.0344828	0		unknown	n.d.	n.d.	n.d.	n.d.	n.d.	n.d.	n.d.	n.d.	n.d.		3'-5' exonuclease, putative, expressed
LOC_Os05g30870	Locus-imprinted PEG	1		PEG	-2.12057	5.20508	11.8923	0.000563675	0.0153266	0.153465	0.0878661	0.277174	0.233766		PEG	-2.5325	5.6889	31.5176	1.97642e-08	9.40912e-07	0.119741	0.0681458	0.191489	0.223529		protein kinase domain containing protein, expressed
LOC_Os05g31254	Allelic imprinted PEG	1		biallele	-1.82506	4.81519	10.189	0.00141284	0.0341732	0.283784	0.0921053	0.328125	0.203822		PEG	-3.05734	4.67454	37.3897	9.67325e-10	5.42867e-08	0.145038	0.131429	0.0830325	0.0662983		acetyltransferase, GNAT family, putative, expressed
LOC_Os05g31380	Locus-imprinted PEG	1		PEG	-8.87371	6.18966	165.919	5.76272e-38	7.67786e-35	0	0.00125786	0.00722892	0		PEG	-7.82687	6.69455	154.718	1.61389e-35	6.53075e-33	0.00185989	0	0.0143198	0.00614754		GRAS family transcription factor containing protein, expressed
LOC_Os05g32880	Locus-imprinted PEG	1		PEG	-5.55957	3.77729	18.0963	2.10012e-05	0.000822958	0	0.164179	0	0		PEG	-5.58285	3.07773	24.2706	8.37081e-07	3.24227e-05	0.151515	0.0379747	0	0		response regulator receiver domain containing protein, expressed
LOC_Os05g33550	Locus-imprinted PEG	1		PEG	-4.11604	4.76029	31.5992	1.89508e-08	1.17436e-06	0.156425	0.0776699	0.0133333	0.0191083		PEG	-5.07679	3.14845	33.2188	8.23519e-09	4.17929e-07	0.0181818	0.0350877	0.037037	0		methyl-binding domain protein MBD, putative, expressed
LOC_Os05g34310	Locus-imprinted MEG	1		MEG	6.87146	5.94377	75.5078	3.63965e-18	9.0923e-16	1	1	0.996109	0.976774		MEG	5.79735	5.06724	60.3777	7.82932e-15	7.08185e-13	0.941909	0.955307	0.994652	0.996855		no apical meristem protein, putative, expressed
LOC_Os05g34510	Locus-imprinted PEG	1		PEG	-1.94322	12.1631	21.8206	2.99362e-06	0.000134067	0.176142	0.137788	0.26494	0.250868		PEG	-2.19783	10.4296	35.6931	2.30982e-09	1.24625e-07	0.0984972	0.123827	0.265818	0.247804		expressed protein
LOC_Os05g34540	Locus-imprinted PEG	1		PEG	-1.96904	8.97897	23.8369	1.04854e-06	5.11098e-05	0.111415	0.193423	0.268269	0.237844		PEG	-1.88482	8.74232	35.1134	3.11059e-09	1.6437e-07	0.132143	0.189584	0.244085	0.257616		rab GDP dissociation inhibitor alpha, putative, expressed
LOC_Os05g34550	Allelic imprinted PEG	1		biallele	-0.546994	5.27178	1.2507	0.26342	1	0.320611	0.528986	0.468354	0.311321		PEG	-2.0872	4.68192	16.4394	5.02312e-05	0.0014357	0.153846	0.214953	0.162162	0.18328		MLO domain containing protein, putative, expressed
LOC_Os05g40790	Locus-imprinted MEG	1		MEG	6.66897	9.21739	99.1871	2.29733e-23	8.34766e-21	0.99955	0.986216	0.989785	0.978797		MEG	6.31892	9.71327	211.067	8.03759e-48	6.86633e-45	0.982093	0.976164	0.989202	0.992402		CCR4-NOT transcription factor, putative, expressed
LOC_Os05g41210	Unclassified PEG	1		PEG	-6.08843	4.09648	36.7256	1.35979e-09	1.0065e-07	0.00473934	0.0656934	0	0		unknown	n.d.	n.d.	n.d.	n.d.	n.d.	n.d.	n.d.	n.d.	n.d.		OsCam2 - Calmodulin, expressed
LOC_Os05g41790	Unclassified PEG	1		PEG	-5.44278	4.35645	36.1423	1.83424e-09	1.34522e-07	0.146067	0.0128205	0.0131579	0		unknown	n.d.	n.d.	n.d.	n.d.	n.d.	n.d.	n.d.	n.d.	n.d.		zinc finger C-x8-C-x5-C-x3-H type family protein, expressed
LOC_Os05g43480	Locus-imprinted PEG	1		PEG	-3.37091	6.24937	51.0069	9.20427e-13	1.02193e-10	0.191275	0.140056	0.0496183	0.0363036		PEG	-3.79523	5.83912	57.7199	3.02232e-14	2.61091e-12	0.0898204	0.144526	0.0163934	0.0506329		ubiquitin carboxyl-terminal hydrolase domain containing protein, expressed
LOC_Os05g43570	Locus-imprinted PEG	1		PEG	-2.01366	4.5664	12.8989	0.000328782	0.00955738	0.26749	0.219858	0.193717	0.11236		PEG	-1.80898	5.06718	17.2844	3.21817e-05	0.000959027	0.178439	0.179283	0.28	0.231672		AGC AGC other NDRh TRCd.2 - ACG kinases include homologs to PKA, PKG and PKC, expressed
LOC_Os05g45060	Allelic imprinted PEG	1		biallele	-1.86789	3.98585	8.17906	0.00423766	0.0854494	0.301775	0.339286	0.145833	0.121951		PEG	-2.94666	3.41137	16.3832	5.17412e-05	0.00147338	0.0289855	0.122222	0.111111	0.189189		RING-H2 finger protein ATL2M, putative, expressed
LOC_Os05g45830	Allelic imprinted PEG	1		biallele	-0.648497	3.1163	0.530882	0.466236	1	0.476923	0.307692	0.395833	0.368421		PEG	-1.98101	3.74285	11.5671	0.000671286	0.0143966	0.217822	0.157447	0.210526	0.19697		expressed protein
LOC_Os05g48560	Locus-imprinted PEG	1		PEG	-9.03357	7.8227	162.248	3.65107e-37	4.49025e-34	0	0.00160256	0.00421053	0		PEG	-7.83789	7.87467	207.507	4.80507e-47	4.61797e-44	0.00903614	0.0105727	0.000329056	0.00189959		expressed protein
LOC_Os05g48610	Locus-imprinted MEG	1		MEG	3.52644	6.2601	53.8546	2.15891e-13	2.90056e-11	0.967016	0.94382	0.872456	0.805344		MEG	3.75493	6.15667	92.8765	5.56611e-22	9.40551e-20	0.952448	0.937677	0.879137	0.906015		expressed protein
LOC_Os05g48980	Locus-imprinted PEG	1		PEG	-10.8076	5.2535	129.613	4.98005e-30	3.31755e-27	0	0	0	0		PEG	-7.47075	4.61652	80.9026	2.37117e-19	3.11637e-17	0.0218069	0	0	0		ras-related protein, putative, expressed
LOC_Os05g49120	Locus-imprinted PEG	1		PEG	-10.3	4.65177	88.1125	6.18342e-21	1.73439e-18	0	0	0	0		PEG	-4.55792	2.58134	20.0335	7.60956e-06	0.000252126	0.0804598	0.0757576	0	0		NLI interacting factor-like phosphatase, putative, expressed
LOC_Os05g49380	Allelic imprinted MEG	1		biallele	1.07564	1.58967	0.343509	0.557811	1	1	0.619048	0	1		MEG	3.87157	1.78935	10.5384	0.00116922	0.0171229	0.860465	0.860465	1	1		OsDegp9 - Putative Deg protease homologue, expressed
LOC_Os05g50390	Allelic imprinted MEG	1		biallele	3.27789	3.12817	3.15837	0.0755384	0.524378	1	1	0.393939	0.666667		MEG	6.93802	2.84825	36.6641	1.40338e-09	7.31517e-08	1	1	0.971014	1		expressed protein
LOC_Os05g50960	Allelic imprinted PEG	1		PEG	-1.47869	6.02356	13.0572	0.000302113	0.00889537	0.284722	0.2966	0.216301	0.23839		biallele	-1.14999	6.57305	13.0412	0.000304705	0.00719731	0.312546	0.242123	0.298532	0.35446		polygalacturonase, putative, expressed
LOC_Os05g50970	Locus-imprinted PEG	1		PEG	-8.01452	3.73708	52.212	4.98197e-13	5.73034e-11	0	0.00813008	0	0		PEG	-5.91111	3.75542	41.4851	1.18772e-10	7.2763e-09	0.0495868	0.0175439	0	0		protein phosphatase 2C, putative, expressed
LOC_Os05g51400	Locus-imprinted PEG	1		PEG	-4.75751	6.33829	50.5059	1.18806e-12	1.27481e-10	0.0237417	0.00548446	0.0533563	0.0913462		PEG	-5.23368	5.34541	21.4431	3.64477e-06	0.000128545	0.0014556	0.00191205	0.125	0.150943		protein kinase APK1B, chloroplast precursor, putative, expressed
LOC_Os06g01200	Allelic imprinted PEG	1		biallele	-1.58772	5.23563	9.19245	0.00243015	0.0551893	0.274576	0.142857	0.368421	0.263708		PEG	-3.1106	4.28468	25.3574	4.76318e-07	1.91236e-05	0.185185	0.136213	0.102804	0.0200803		zinc finger, C3HC4 type domain containing protein, expressed
LOC_Os06g01680	Allelic imprinted PEG	1		biallele	-1.26886	8.20219	13.7983	0.000203517	0.00624534	0.427049	0.367729	0.205282	0.199694		PEG	-1.49297	8.29139	36.8717	1.26163e-09	6.95345e-08	0.290813	0.27472	0.225955	0.220525		expressed protein
LOC_Os06g02028	Locus-imprinted PEG	1		PEG	-3.47211	6.48598	30.0777	4.15079e-08	2.45789e-06	0.202864	0.134328	0.0188324	0.0483619		PEG	-2.93876	5.35104	30.7165	2.98615e-08	1.38725e-06	0.192308	0.229268	0.0586265	0.052		eyes absent homolog 4, putative, expressed
LOC_Os06g03770	Unclassified PEG	1		PEG	-2.54285	4.70745	15.0024	0.000107374	0.00356161	0.197861	0.207843	0.104167	0.0736842		unknown	n.d.	n.d.	n.d.	n.d.	n.d.	n.d.	n.d.	n.d.	n.d.		ABC transporter, ATP-binding protein, putative, expressed
LOC_Os06g04920	Unclassified PEG	1		PEG	-5.11621	4.02747	14.5885	0.000133728	0.00433679	0.18593	0	0	0		unknown	n.d.	n.d.	n.d.	n.d.	n.d.	n.d.	n.d.	n.d.	n.d.		zinc finger family protein, putative, expressed
LOC_Os06g04930	Unclassified PEG	0.178428		PEG	-5.51095	5.83883	78.6829	7.29255e-19	1.71461e-16	0	0.117647	0.016731	0.012848		unknown	n.d.	n.d.	n.d.	n.d.	n.d.	n.d.	n.d.	n.d.	n.d.		expressed protein
LOC_Os06g06090	Allelic imprinted PEG	1		biallele	-1.66933	7.91797	17.5404	2.81273e-05	0.00106564	0.428064	0.338268	0.141287	0.125499		PEG	-2.38694	7.05218	46.8379	7.71075e-12	5.15514e-10	0.264309	0.224944	0.0882016	0.0939633		CGMC MAPKCMGC 2 ERK.12 - CGMC includes CDA, MAPK, GSK3, and CLKC kinases, expressed
LOC_Os06g06870	Locus-imprinted PEG	1		PEG	-5.35925	5.42515	23.3009	1.38537e-06	6.57248e-05	0.127907	0.157534	0	0		PEG	-3.87804	5.57052	90.9006	1.51073e-21	2.44532e-19	0.074266	0.056962	0.0557491	0.0558559		zinc finger protein, putative, expressed
LOC_Os06g07230	Unclassified MEG	0.282995		unknown	n.d.	n.d.	n.d.	n.d.	n.d.	n.d.	n.d.	n.d.	n.d.		MEG	5.35038	0.170836	9.72495	0.00181784	0.0245847	1	1	1	1		tyrosine protein kinase domain containing protein, putative, expressed
LOC_Os06g07700	Unclassified PEG	1		PEG	-3.61088	6.47298	64.673	8.84169e-16	1.44246e-13	0.0511364	0.13253	0.0464505	0.0710059		unknown	n.d.	n.d.	n.d.	n.d.	n.d.	n.d.	n.d.	n.d.	n.d.		expressed protein
LOC_Os06g08740	Locus-imprinted PEG	1		PEG	-6.32504	7.56889	26.1471	3.1637e-07	1.64225e-05	0.155514	0.08125	0.000430478	0.000551572		PEG	-5.56156	7.44261	121.41	3.10797e-28	7.02813e-26	0.0636231	0.0280543	0.00969932	0.00563991		expressed protein
LOC_Os06g10710	Unclassified MEG	1		unknown	n.d.	n.d.	n.d.	n.d.	n.d.	n.d.	n.d.	n.d.	n.d.		MEG	2.80078	4.2928	18.5853	1.62472e-05	0.000416389	0.824916	0.795699	0.786164	0.982609		expressed protein
LOC_Os06g11620	Locus-imprinted PEG	1		PEG	-3.24664	7.58293	64.0964	1.18477e-15	1.91335e-13	0.115942	0.0495413	0.0999108	0.119537		PEG	-3.40664	4.71909	32.2903	1.32777e-08	6.52304e-07	0.201923	0.0351759	0.0585774	0.0518519		RNA recognition motif containing protein, putative, expressed
LOC_Os06g11730	Allelic imprinted MEG	1		MEG	4.69024	6.3566	68.371	1.35454e-16	2.88752e-14	0.974359	0.923567	0.992593	0.945559		biallele	3.15011	3.89552	19.7914	8.63721e-06	0.0002326	0.969697	0.917949	0.846154	0.666667		RNA recognition motif containing protein, putative, expressed
LOC_Os06g12260	Locus-imprinted PEG	1		PEG	-3.22145	7.11327	32.8366	1.00241e-08	6.54144e-07	0.255983	0.209057	0.0526316	0.019685		PEG	-2.97298	3.8389	15.2493	9.42104e-05	0.00256651	0.274725	0.216867	0.0363636	0.0376569		N-rich protein, putative, expressed
LOC_Os06g12590	Locus-imprinted PEG	1		PEG	-3.02269	4.78905	20.8135	5.06237e-06	0.000219938	0.184211	0.0434783	0.0344828	0.173653		PEG	-3.39446	3.35072	12.2442	0.0004667	0.0105381	0.062069	0.037037	0.15847	0		protein kinase, putative, expressed
LOC_Os06g12680	Unclassified PEG	1		PEG	-3.51478	4.17244	14.2697	0.000158395	0.00502594	0.21519	0.175	0.0357143	0		unknown	n.d.	n.d.	n.d.	n.d.	n.d.	n.d.	n.d.	n.d.	n.d.		RING-H2 finger protein, putative, expressed
LOC_Os06g13900	Unclassified MEG	1		unknown	n.d.	n.d.	n.d.	n.d.	n.d.	n.d.	n.d.	n.d.	n.d.		MEG	6.38281	0.777746	12.2814	0.0004575	0.00770535	1	1	1	1		transposon%20protein%2C%20putative%2C%20unclassified%2C%20expressed
LOC_Os06g21600	Allelic imprinted PEG	1		biallele	-1.05993	5.31558	4.84155	0.0277819	0.336753	0.37931	0.309524	0.387097	0.262136		PEG	-1.50829	4.91732	12.091	0.000506666	0.0113406	0.281915	0.207101	0.223188	0.280397		selenoprotein O, putative, expressed
LOC_Os06g23460	Locus-imprinted PEG	1		PEG	-3.6591	6.67806	48.8343	2.78531e-12	2.77829e-10	0.235792	0.0769231	0.0249187	0.0403121		PEG	-3.60613	6.33131	56.9024	4.57986e-14	3.82742e-12	0.0809674	0.0232558	0.127208	0.0604915		KH domain containing protein, putative, expressed
LOC_Os06g24920	Allelic imprinted MEG	1		MEG	8.66714	3.35051	26.1141	3.21829e-07	1.70444e-05	1	1	1	1		biallele	-0.956956	4.5445	0.0380058	0.845431	1	0.0132159	0.00194932	1	0.952941		SAR DNA-binding protein-like, putative, expressed
LOC_Os06g28820	Allelic imprinted PEG	1		biallele	-2.98107	1.93694	2.89201	0.0890196	0.675502	1	0	0.368421	0		PEG	-3.97126	2.19821	13.6987	0.000214598	0.00533961	0.125	0	0.12	0.011236		cycloartenol synthase, putative, expressed
LOC_Os06g29740	Locus-imprinted MEG	1		MEG	9.18962	3.74861	48.0134	4.23312e-12	4.76613e-10	1	1	1	1		MEG	6.19289	2.78668	21.148	4.2515e-06	0.000123117	1	1	1	0.857143		OsFBX197 - F-box domain containing protein, expressed
LOC_Os06g30060	Locus-imprinted PEG	1		PEG	-5.57409	7.21648	81.6338	1.63792e-19	4.29295e-17	0.0674487	0.00380952	0.015748	0.00977654		PEG	-6.34505	7.15253	120.004	6.31234e-28	1.40674e-25	0.0218978	0.0195838	0.0123874	0		expressed protein
LOC_Os06g32944	Unclassified MEG	1		MEG	7.48684	2.22779	17.613	2.70728e-05	0.0010066	1	1	1	1		unknown	n.d.	n.d.	n.d.	n.d.	n.d.	n.d.	n.d.	n.d.	n.d.		transposon%20protein%2C%20putative%2C%20Pong%20sub-class%2C%20expressed
LOC_Os06g35160	Locus-imprinted PEG	1		PEG	-4.40776	7.06466	40.7965	1.68934e-10	1.40673e-08	0.00813008	0.0272989	0.0650155	0.118129		PEG	-4.416	5.95826	86.525	1.3798e-20	1.98292e-18	0.0178971	0.0343392	0.0694184	0.0621302		CAMK KIN1/SNF1/Nim1 like.26 - CAMK includes calcium/calmodulin depedent protein kinases, expressed
LOC_Os06g35530	Locus-imprinted PEG	1		PEG	-3.96201	7.3263	40.8447	1.64816e-10	1.37962e-08	0.193056	0.125364	0.0163317	0.0216963		PEG	-4.62494	6.48874	84.2731	4.30949e-20	5.97e-18	0.111354	0.0394338	0.0138889	0.0200573		CGMC GSK.8 - CGMC includes CDA, MAPK, GSK3, and CLKC kinases, expressed
LOC_Os06g40490	Locus-imprinted PEG	1		PEG	-5.5679	4.64155	33.5225	7.04458e-09	4.69286e-07	0.116788	0.00689655	0	0		PEG	-4.31712	5.03457	58.0668	2.5337e-14	2.26515e-12	0.0936819	0.0503876	0.00961538	0.0588235		glycosyl hydrolases family 17, putative, expressed
LOC_Os06g40520	Allelic imprinted MEG	1		biallele	2.67935	3.60842	6.66767	0.00981772	0.140276	0.675	0.657534	1	1		MEG	6.82961	1.29542	11.8267	0.000583871	0.00959543	1	1	1	1		TNP1, putative, expressed
LOC_Os06g42910	Locus-imprinted PEG	1		PEG	-4.15467	6.93572	67.7823	1.82579e-16	3.20778e-14	0.108156	0.0709318	0.0186916	0.0360288		PEG	-6.31118	6.09371	52.107	5.25578e-13	4.06121e-11	0.0577889	0.0488082	0	0.00099108		expressed protein
LOC_Os06g42990	Locus-imprinted PEG	1		PEG	-5.48408	6.83811	138.682	5.16942e-32	3.59342e-29	0.0472441	0.0148699	0.013597	0.0171278		PEG	-5.61576	6.38074	83.4621	6.495e-20	8.76084e-18	0.0546139	0.0430906	0.00881057	0.00123001		AP2 domain containing protein, expressed
LOC_Os06g45000	Allelic imprinted PEG	1		biallele	-2.03243	6.65802	30.1334	4.03334e-08	2.39721e-06	0.307975	0.172285	0.178462	0.152299		PEG	-2.00248	6.84841	37.3207	1.00214e-09	5.6036e-08	0.131558	0.162511	0.236824	0.24986		ubiquitin-conjugating enzyme, putative, expressed
LOC_Os06g46435	Allelic imprinted MEG	0.150535		biallele	5.04844	0.625939	6.3008	0.0120684	0.162689	1	1	1	1		MEG	4.97459	-0.0699914	8.90335	0.00284648	0.0353368	1	1	1	1		NADPH-dependent oxidoreductase, putative, expressed
LOC_Os06g47290	Allelic imprinted PEG	1		biallele	-4.42081	1.85106	6.36399	0.0116459	0.183624	0	0.3	0	0		PEG	-4.80619	2.28055	16.5485	4.74227e-05	0.00136302	0.173913	0.0379747	0	0		growth regulator related protein, putative, expressed
LOC_Os06g47830	Allelic imprinted PEG	0.117806		biallele	-0.549876	2.29619	0.255541	0.6132	1	0.632653	0.185185	0.307692	0.538462		PEG	-4.57823	2.72326	16.3747	5.1975e-05	0.0014773	0.223881	0.056	0	0		RPA2C - Putative single-stranded DNA binding complex subunit 2, expressed
LOC_Os06g51490	Allelic imprinted MEG	1		MEG	6.36472	1.34571	10.6474	0.00110227	0.025357	1	1	1	1		biallele	0.20657	1.16393	0.0165672	0.897584	1	0.4375	1	0.333333	NA		PHD-finger domain containing protein, putative, expressed
LOC_Os07g01450	Unclassified MEG	1		MEG	4.00739	7.3528	28.7304	8.31887e-08	5.01895e-06	0.827121	0.809705	0.991792	0.968127		unknown	n.d.	n.d.	n.d.	n.d.	n.d.	n.d.	n.d.	n.d.	n.d.		DNA directed RNA polymerase, 7 kDa subunit domain containing protein, expressed
LOC_Os07g01460	Allelic imprinted PEG	1		biallele	-3.27211	2.22103	4.04729	0.0442423	0.455471	0.25	0.372549	0	0		PEG	-3.84027	2.60757	15.497	8.26345e-05	0.00227311	0.0434783	0.0387597	0.125	0		expressed protein
LOC_Os07g01900	Unclassified MEG	1		MEG	6.43096	1.38899	9.32635	0.00225881	0.0451424	1	1	1	1		unknown	n.d.	n.d.	n.d.	n.d.	n.d.	n.d.	n.d.	n.d.	n.d.		expressed protein
LOC_Os07g02290	Unclassified PEG	1		PEG	-6.02982	4.68415	44.2065	2.95498e-11	2.63934e-09	0.0140845	0	0	0.0526316		unknown	n.d.	n.d.	n.d.	n.d.	n.d.	n.d.	n.d.	n.d.	n.d.		OsFBX208 - F-box domain containing protein, expressed
LOC_Os07g04220	Allelic imprinted PEG	1		PEG	-2.95624	5.30993	32.2521	1.35408e-08	8.55691e-07	0.14359	0.127907	0.104116	0.0774411		biallele	-2.37	3.42445	9.76434	0.00177929	0.0334886	0.115942	0.485714	0.217949	0.043956		wound and phytochrome signaling involved receptor like kinase, putative, expressed
LOC_Os07g06610	Locus-imprinted PEG	1		PEG	-7.98504	4.82225	88.8938	4.16578e-21	1.21096e-18	0.0060241	0	0	0.00621118		PEG	-8.55655	4.74084	115.674	5.60263e-27	1.19655e-24	0.00659341	0	0	0		ubiquitin carboxyl-terminal hydrolase domain containing protein, expressed
LOC_Os07g06980	Unclassified PEG	1		PEG	-2.40119	7.15801	38.182	6.44439e-10	5.026e-08	0.152066	0.179435	0.182493	0.105005		unknown	n.d.	n.d.	n.d.	n.d.	n.d.	n.d.	n.d.	n.d.	n.d.		histone deacetylase, putative, expressed
LOC_Os07g08880	Unclassified MEG	1		unknown	n.d.	n.d.	n.d.	n.d.	n.d.	n.d.	n.d.	n.d.	n.d.		MEG	2.46891	7.64432	85.4463	2.38085e-20	3.58924e-18	0.814108	0.855455	0.797126	0.860552		ES43 protein, putative, expressed
LOC_Os07g09020	Locus-imprinted MEG	1		MEG	7.7186	2.43123	19.6824	9.14407e-06	0.000373901	1	1	1	1		MEG	7.74555	6.94464	244.316	4.50459e-55	7.69635e-52	0.992134	0.985697	0.997954	0.998701		argonaute, putative, expressed
LOC_Os07g10840	Allelic imprinted MEG	0.0629417		biallele	1.15213	1.17336	0.416322	0.518778	1	0.995842	1	0.923077	0.814815		MEG	5.93146	0.514923	11.7903	0.0005954	0.00970887	1	1	1	1		uncharacterized glycosyltransferase, putative, expressed
LOC_Os07g12260	Allelic imprinted MEG	1		biallele	7.03721	1.98223	10.5157	0.00118362	0.0269569	1	1	NA	1		MEG	10.0109	3.93526	76.4304	2.28108e-18	2.74033e-16	1	1	1	1		retrotransposon%20protein%2C%20putative%2C%20unclassified%2C%20expressed
LOC_Os07g12490	Locus-imprinted PEG	1		PEG	-8.91018	3.41905	42.9198	5.70314e-11	5.03767e-09	0	0	0	0		PEG	-6.60346	5.13003	63.0652	1.99979e-15	1.9712e-13	0.0272374	0.047619	0	0.00130378		KH domain containing protein, putative, expressed
LOC_Os07g12630	Allelic imprinted PEG	1		biallele	-1.66923	4.9893	9.13716	0.0025047	0.0564015	0.233161	0.116751	0.352564	0.273381		PEG	-2.76889	4.16057	20.7796	5.15277e-06	0.000177257	0.0588235	0.12987	0.0804598	0.20442		transcription elongation factor protein, putative, expressed
LOC_Os07g17210	Allelic imprinted PEG	1		biallele	-2.75271	5.10843	3.00081	0.0832227	0.652095	0.011583	0	0.580713	0.517787		PEG	-4.20671	3.10439	17.8608	2.37664e-05	0.000725111	0.0967742	0	0	0.106667		FAS1, putative, expressed
LOC_Os07g17460	Locus-imprinted PEG	1		PEG	-8.70386	6.18962	151.254	9.22247e-35	9.21555e-32	0	0.00888099	0	0		PEG	-7.79364	6.25764	174.519	7.62637e-40	4.18824e-37	0.00233645	0.00252525	0.0102916	0		OsFBL36 - F-box domain and LRR containing protein, expressed
LOC_Os07g18610	Allelic imprinted PEG	1		biallele	-3.86277	4.84785	14.2396	0.000160947	0.00509547	0.361478	0.177112	0	0		PEG	-5.00624	6.2191	12.0774	0.000510372	0.011407	0.29107	0.250859	0	0		OsFBLD7 - F-box, LRR and FBD domain containing protein, expressed
LOC_Os07g18670	Locus-imprinted PEG	1		PEG	-6.58191	3.43327	33.6702	6.52945e-09	4.38625e-07	0	0.030303	0.00636943	0		PEG	-6.43265	5.02213	92.5853	6.44851e-22	1.1268e-19	0.00653595	0.030303	0.00990099	0.003517		expressed protein
LOC_Os07g18720	Locus-imprinted PEG	1		PEG	-4.07497	3.84469	22.8544	1.74745e-06	8.19305e-05	0.0807453	0.042735	0.129032	0		PEG	-6.14708	3.95581	34.4239	4.43244e-09	2.31043e-07	0.0761905	0	0	0		tetratricopeptide repeat containing protein, putative, expressed
LOC_Os07g20110	Locus-imprinted MEG	1		MEG	5.78815	7.71805	45.086	1.88569e-11	1.86101e-09	0.998201	0.997593	0.943286	0.897533		MEG	5.84158	7.58437	183.437	8.61184e-42	5.09324e-39	0.994816	0.960876	0.969654	0.98036		expressed protein
LOC_Os07g27030	Allelic imprinted MEG	1		biallele	3.61582	2.37172	6.80944	0.0090677	0.132639	0.857143	0.842105	1	1		MEG	9.12172	3.08865	50.0678	1.48525e-12	1.03342e-10	1	1	1	1		OsFBX236 - F-box domain containing protein, expressed
LOC_Os07g27110	Locus-imprinted PEG	1		PEG	-6.03509	7.28575	97.4294	5.58118e-23	2.028e-20	0.0524691	0.0188062	0.00138122	0.0104463		PEG	-4.86503	6.37539	128.316	9.57001e-30	2.37352e-27	0.0348624	0.0372208	0.0115207	0.0415335		RNA recognition motif containing protein, expressed
LOC_Os07g27300	Locus-imprinted PEG	1		PEG	-5.75445	5.47586	48.5735	3.18136e-12	3.13972e-10	0.0752688	0.0533808	0	0.00232019		PEG	-4.36562	5.16338	63.8231	1.36109e-15	1.36794e-13	0.116071	0.0489237	0.0238727	0.0185185		RNA-binding protein Luc7-like, putative, expressed
LOC_Os07g27430	Allelic imprinted PEG	1		biallele	-2.66971	1.60409	1.98833	0.158515	0.907196	1	0.04	NA	0.0588235		PEG	-2.81629	3.25089	11.8561	0.000574727	0.0126977	0.140187	0.0291262	0.22973	0.0425532		expressed protein
LOC_Os07g27450	Locus-imprinted PEG	0.29863		PEG	-4.38228	3.76639	23.3503	1.35025e-06	6.42493e-05	0.0515464	0.0955414	0	0.0291262		PEG	-4.23431	3.5008	19.3051	1.11407e-05	0.000358391	0.226415	0.105263	0.0169492	0		expressed protein
LOC_Os07g28850	Locus-imprinted MEG	1		MEG	4.67097	8.95912	38.9716	4.3002e-10	3.69632e-08	0.988238	0.993455	0.823204	0.851521		MEG	3.94248	8.80249	95.3202	1.61952e-22	2.76704e-20	0.967424	0.966201	0.851169	0.881977		retrotransposon%20protein%2C%20putative%2C%20unclassified%2C%20expressed
LOC_Os07g32360	Allelic imprinted MEG	1		biallele	6.54109	1.55061	8.02288	0.004619	0.0802702	1	NA	1	1		MEG	7.89604	1.98698	25.6134	4.17129e-07	1.46443e-05	1	1	1	1		expressed protein
LOC_Os07g32412	Allelic imprinted PEG	1		biallele	-2.20885	5.6241	22.6268	1.96719e-06	9.14285e-05	0.373418	0.130435	0.138402	0.119363		PEG	-3.36299	2.93069	16.5295	4.78982e-05	0.00137157	0.147826	0.174603	0.0461538	0.0333333		transposon%20protein%2C%20putative%2C%20unclassified%2C%20expressed
LOC_Os07g32774	Locus-imprinted PEG	1		PEG	-2.21425	6.37265	23.6287	1.16831e-06	5.62621e-05	0.118644	0.134021	0.192529	0.258786		PEG	-1.80508	6.01061	26.7152	2.35757e-07	9.74524e-06	0.202417	0.163449	0.259341	0.234694		chorismate mutase/prephenate dehydratase, putative, expressed
LOC_Os07g34550	Locus-imprinted MEG	1		MEG	6.63411	3.13302	22.426	2.18397e-06	0.000102397	1	0.982609	1	1		MEG	6.61426	4.72122	78.9763	6.2859e-19	7.92281e-17	1	0.984344	0.988636	0.978022		retrotransposon%20protein%2C%20putative%2C%20unclassified%2C%20expressed
LOC_Os07g34620	Locus-imprinted MEG	1		MEG	3.95765	7.52511	103.201	3.02853e-24	1.345e-21	0.930116	0.955734	0.887233	0.948633		MEG	3.43839	5.85879	36.0457	1.92739e-09	9.68547e-08	0.730769	0.847458	0.955078	0.939984		expressed protein
LOC_Os07g39020	Locus-imprinted MEG	0.0721334		MEG	4.96716	4.26592	21.4686	3.59661e-06	0.000162437	0.997093	1	1	1		MEG	5.9841	2.28012	20.7598	5.20658e-06	0.000147443	1	1	0.993289	1		OsSub53 - Putative Subtilisin homologue, expressed
LOC_Os07g39400	Locus-imprinted PEG	1		PEG	-1.93665	7.60726	29.4824	5.64255e-08	3.30451e-06	0.23445	0.196507	0.215244	0.172222		PEG	-1.92163	7.13183	42.4416	7.28253e-11	4.58949e-09	0.267152	0.225554	0.157824	0.160861		polyol transporter 5, putative, expressed
LOC_Os07g41160	Allelic imprinted PEG	1		PEG	-7.14926	3.11338	27.6231	1.47408e-07	8.01618e-06	0	0	0	0.0204082		biallele	-3.58105	2.13443	3.0558	0.0804493	0.621673	0.304348	1	0	0		protein of unknown function DUF1675 domain containing protein, expressed
LOC_Os07g41240	Unclassified PEG	1		unknown	n.d.	n.d.	n.d.	n.d.	n.d.	n.d.	n.d.	n.d.	n.d.		PEG	-2.51254	7.56412	56.1255	6.79884e-14	5.62074e-12	0.104955	0.113412	0.182674	0.180805		cytochrome P450, putative, expressed
LOC_Os07g42150	Allelic imprinted MEG	1		biallele	1.93178	4.51066	7.34722	0.00671665	0.105799	0.732558	0.717314	0.981481	0.675676		MEG	1.83291	4.70974	14.4526	0.000143731	0.00282123	0.761733	0.705	0.745763	0.824818		transcription initiation factor IID, putative, expressed
LOC_Os07g42180	Allelic imprinted PEG	1		biallele	-2.17845	4.50148	6.40403	0.0113861	0.180597	0.333333	0	0.244444	0.246575		PEG	-4.62402	5.34749	89.4017	3.22253e-21	4.90623e-19	0.0655738	0.0208668	0.035533	0.031746		exportin 1, putative, expressed
LOC_Os07g42390	Allelic imprinted MEG	1		MEG	1.62398	6.56474	12.3984	0.000429697	0.0114309	0.742947	0.835052	0.712195	0.718147		biallele	4.50143	3.5909	13.5643	0.000230525	0.00426057	0.906977	0.672727	1	1		DUF581 domain containing protein, expressed
LOC_Os07g42760	Locus-imprinted PEG	1		PEG	-5.28025	3.54742	27.3884	1.66429e-07	8.98941e-06	0.0285714	0.0756303	0	0		PEG	-3.25628	4.46647	38.1252	6.63465e-10	3.77855e-08	0.0989761	0.110345	0.0530612	0.0996016		expressed protein
LOC_Os07g42770	Allelic imprinted PEG	0.10938		biallele	-2.55203	4.54853	13.5645	0.000230508	0.00696129	0.304348	0.163934	0.0984456	0.0416667		PEG	-5.32538	5.00748	57.2601	3.81825e-14	3.24382e-12	0.0604839	0.0442478	0.0129199	0		CAMK CAMK like.35 - CAMK includes calcium/calmodulin depedent protein kinases, expressed
LOC_Os07g43160	Locus-imprinted PEG	1		PEG	-3.78387	10.6336	72.933	1.34124e-17	2.85917e-15	0.0518759	0.0392648	0.111303	0.0815008		PEG	-4.38426	10.8015	208.109	3.5514e-47	3.64066e-44	0.0385102	0.0453258	0.0437245	0.0466382		uncharacterized glycosyl hydrolase Rv2006/MT2062, putative, expressed
LOC_Os07g44060	Locus-imprinted MEG	0.062824		MEG	6.59814	1.69498	10.8171	0.00100565	0.0235407	1	1	1	1		MEG	4.79355	0.993359	10.7618	0.00103614	0.0154622	1	0.994872	1	1		haloacid dehalogenase-like hydrolase family protein, putative, expressed
LOC_Os07g45064	Allelic imprinted PEG	1		biallele	-1.76728	1.09798	0.368708	0.543709	1	1	0	NA	0		PEG	-3.08415	6.59277	98.9335	2.61128e-23	4.72396e-21	0.10211	0.10327	0.104746	0.0913706		Phosphatidylinositol kinase and FAT containing domain protein, putative, expressed
LOC_Os07g45070	Allelic imprinted PEG	1		biallele	-2.73938	6.31058	29.8447	4.68063e-08	2.75125e-06	0.301915	0.174825	0.101639	0.0324401		PEG	-2.81629	6.93792	64.672	8.84631e-16	9.06865e-14	0.204598	0.0898466	0.0692063	0.120489		FAT domain-containing protein, putative, expressed
LOC_Os07g45400	Locus-imprinted PEG	1		PEG	-4.82547	7.72777	55.5156	9.27203e-14	1.15813e-11	0.14258	0.0569476	0.00507614	0.014966		PEG	-2.42237	6.70007	40.4497	2.01742e-10	1.21179e-08	0.105263	0.0934019	0.21028	0.225723		expressed protein
LOC_Os07g48110	Unclassified MEG	1		MEG	6.29997	1.47657	9.40603	0.00216272	0.0437722	1	1	1	1		unknown	n.d.	n.d.	n.d.	n.d.	n.d.	n.d.	n.d.	n.d.	n.d.		expressed protein
LOC_Os07g48170	Locus-imprinted PEG	1		PEG	-5.65833	5.34083	65.6438	5.40245e-16	8.90457e-14	0.035533	0.00242131	0.0337079	0.00473934		PEG	-6.41662	6.10439	117.816	1.90257e-27	4.17941e-25	0.0185759	0.0297483	0.00406504	0.00221239		nucleotidyltransferase, putative, expressed
LOC_Os07g48260	Locus-imprinted PEG	0.251379		PEG	-5.32497	2.28642	10.9414	0.00094041	0.0241337	0	0.130435	0	0		PEG	-7.71842	1.67661	26.0794	3.27657e-07	1.33644e-05	0	0	0	0		WRKY47, expressed
LOC_Os07g48400	Locus-imprinted MEG	1		MEG	10.485	4.97504	86.2926	1.55186e-20	4.59467e-18	1	1	1	1		MEG	10.9183	4.81301	123.209	1.25504e-28	2.83805e-26	1	1	1	1		retrotransposon%20protein%2C%20putative%2C%20unclassified%2C%20expressed
LOC_Os07g48910	Allelic imprinted MEG	0.236716		biallele	2.54589	1.16448	1.51597	0.218231	0.858742	1	1	1	0.4		MEG	6.38999	0.791274	14.0551	0.000177528	0.00338368	1	1	1	1		retrotransposon%20protein%2C%20putative%2C%20unclassified%2C%20expressed
LOC_Os08g01054	Locus-imprinted PEG	1		PEG	-5.18214	7.53943	49.4306	2.05515e-12	2.10626e-10	0.114458	0.086121	0.00796813	0.00276625		PEG	-4.89534	7.5087	128.842	7.34256e-30	1.85093e-27	0.0688164	0.0425308	0.0227508	0.00877706		retrotransposon%20protein%2C%20putative%2C%20unclassified%2C%20expressed
LOC_Os08g01570	Locus-imprinted MEG	1		MEG	4.50014	4.08636	21.9663	2.77481e-06	0.000126753	0.726316	0.991597	0.975	1		MEG	4.74278	3.9747	28.568	9.04665e-08	3.5397e-06	0.938596	0.837838	1	1		retrotransposon%20protein%2C%20putative%2C%20unclassified%2C%20expressed
LOC_Os08g01680	Locus-imprinted PEG	1		PEG	-6.92465	4.13816	47.4364	5.68185e-12	5.50554e-10	0	0.0333333	0	0		PEG	-9.76442	3.61863	74.9449	4.8404e-18	5.95447e-16	0	0	0	0		WD domain, G-beta repeat domain containing protein, expressed
LOC_Os08g03350	Allelic imprinted MEG	1		biallele	2.76646	1.93637	2.48267	0.115106	0.65098	0.9	0.928571	NA	NA		MEG	2.89891	3.57966	11.2699	0.00078774	0.0123477	0.759336	0.72	1	1		amino acid transporter, putative, expressed
LOC_Os08g03470	Unclassified MEG	1		unknown	n.d.	n.d.	n.d.	n.d.	n.d.	n.d.	n.d.	n.d.	n.d.		MEG	8.29775	4.85017	113.01	2.14735e-26	4.23331e-24	0.996269	0.995475	1	1		MBTB15 - Bric-a-Brac, Tramtrack, Broad Complex BTB domain with Meprin and TRAF Homology MATH domain, expressed
LOC_Os08g04290	Locus-imprinted MEG	1		MEG	5.79877	7.62407	99.6218	1.84464e-23	6.97627e-21	0.99457	0.974661	0.975791	0.983434		MEG	6.0792	8.14534	236.881	1.88304e-53	2.63231e-50	0.977238	0.972003	0.992717	0.988724		WD domain, G-beta repeat domain containing protein, expressed
LOC_Os08g06330	Locus-imprinted MEG	1		MEG	2.63291	7.35055	36.6151	1.43909e-09	1.16302e-07	0.887439	0.717728	0.885135	0.893819		MEG	2.73952	6.14053	58.7863	1.75762e-14	1.51837e-12	0.848375	0.872024	0.835536	0.863179		zinc finger C-x8-C-x5-C-x3-H type family protein, expressed
LOC_Os08g06420	Locus-imprinted PEG	1		PEG	-3.56949	7.64699	92.9228	5.43756e-22	1.84969e-19	0.103145	0.0907317	0.0496864	0.0726761		PEG	-3.93108	6.80953	64.6783	8.81807e-16	9.06865e-14	0.0307503	0.0242915	0.100086	0.130856		abhydrolase domain-containing protein FAM108C1, putative, expressed
LOC_Os08g08000	Locus-imprinted PEG	1		PEG	-4.04554	4.90985	16.8965	3.94736e-05	0.00145416	0.24581	0.222707	0	0.00847458		PEG	-3.74457	5.34089	41.8327	9.94273e-11	6.11558e-09	0.141005	0.0421585	0.0646552	0.0186335		DNA binding protein, putative, expressed
LOC_Os08g09570	Allelic imprinted PEG	1		biallele	-1.89041	2.89121	2.06081	0.15113	0.897907	NA	0.195402	0.125	0.25641		PEG	-4.31681	2.27218	9.35641	0.00222207	0.0404843	0	0	0.290323	0		expressed protein
LOC_Os08g13110	Allelic imprinted PEG	1		biallele	-9.42229	4.28079	44.297	2.82142e-11	2.53421e-09	NA	0	0	0		PEG	-6.37557	5.28542	63.0394	2.02613e-15	1.98445e-13	0.0545455	0.0163934	0.00531915	0		hypothetical protein
LOC_Os08g13130	Allelic imprinted PEG	1		biallele	-7.36916	1.95231	12.7717	0.000351907	0.0101374	NA	0	0	0		PEG	-4.44186	6.20523	24.5207	7.35144e-07	2.86911e-05	0.00972053	0.00620347	0.18408	0.179191		expressed protein
LOC_Os08g13350	Allelic imprinted PEG	1		biallele	-2.69204	4.5938	8.64145	0.00328599	0.0702359	0.521531	0.0535714	0.0886076	0		PEG	-3.85542	3.97796	22.9093	1.69828e-06	6.29264e-05	0.0976744	0	0.10101	0.0340909		expressed protein
LOC_Os08g24400	Locus-imprinted PEG	1		PEG	-4.36035	5.67322	32.8497	9.95665e-09	6.52485e-07	0.201946	0.0517241	0.012931	0.0110294		PEG	-4.03078	5.38693	27.5865	1.50224e-07	6.37794e-06	0.164786	0.210162	0.0152672	0.00898204		SWP, putative, expressed
LOC_Os08g24420	Locus-imprinted PEG	1		PEG	-4.86773	6.50629	35.571	2.4592e-09	1.78717e-07	0.190898	0.0452555	0.00119474	0.0142631		PEG	-3.91835	6.93863	23.2515	1.42142e-06	5.33103e-05	0.271795	0.230976	0.0104103	0.0105263		SWP, putative, expressed
LOC_Os08g26990	Allelic imprinted MEG	1		MEG	4.87383	4.28327	19.9802	7.82465e-06	0.000325783	1	0.94	1	1		biallele	4.59937	3.81149	6.89498	0.00864381	0.0877332	1	1	0	0.869565		response regulator receiver domain containing protein, expressed
LOC_Os08g27240	Allelic imprinted PEG	1		biallele	-2.7284	6.30823	16.7629	4.23537e-05	0.00154955	0.445055	0.114754	0.0532787	0.0391595		PEG	-4.60637	5.46297	20.0298	7.62428e-06	0.000252126	0.235294	0.166667	0.00830368	0.00112994		ARID/BRIGHT DNA-binding domain containing protein, expressed
LOC_Os08g27860	Locus-imprinted PEG	1		PEG	-4.15617	7.25374	88.538	4.98682e-21	1.42374e-18	0.0989761	0.0230342	0.0595138	0.0396197		PEG	-3.73622	6.71977	91.7542	9.81411e-22	1.64034e-19	0.0573833	0.0344828	0.0769231	0.113487		EARLY flowering protein, putative, expressed
LOC_Os08g27870	Locus-imprinted MEG	1		MEG	9.44975	7.49437	252.175	8.7163e-57	6.96781e-53	1	1	0.994424	0.998611		MEG	7.65452	6.60097	235.538	3.6955e-53	4.73547e-50	0.991063	0.990758	0.997927	0.998271		EARLY flowering protein, putative, expressed
LOC_Os08g28160	Unclassified MEG	1		MEG	6.71234	1.69614	12.0993	0.000504399	0.0130915	1	1	1	1		unknown	n.d.	n.d.	n.d.	n.d.	n.d.	n.d.	n.d.	n.d.	n.d.		hypothetical protein
LOC_Os08g28940	Allelic imprinted MEG	1		MEG	6.49578	3.03476	23.5466	1.21923e-06	5.94302e-05	0.962264	1	1	1		biallele	1.98568	2.25361	0.572985	0.449075	0.953902	1	1	0.263158	0		OsFBX289 - F-box domain containing protein, expressed
LOC_Os08g28960	Locus-imprinted MEG	1		MEG	9.18859	3.73781	49.3999	2.08757e-12	2.45412e-10	1	1	1	1		MEG	5.46461	2.67062	25.1468	5.31282e-07	1.83173e-05	1	1	0.965517	0.891892		expressed protein
LOC_Os08g29580	Unclassified MEG	1		unknown	n.d.	n.d.	n.d.	n.d.	n.d.	n.d.	n.d.	n.d.	n.d.		MEG	8.66404	2.72098	33.5793	6.84179e-09	3.18807e-07	1	1	1	1		expressed protein
LOC_Os08g34690	Allelic imprinted MEG	1		biallele	5.66911	1.28885	5.23357	0.0221551	0.244624	1	1	NA	NA		MEG	7.25466	1.55839	15.3075	9.13545e-05	0.00190347	1	1	1	1		transposon%20protein%2C%20putative%2C%20unclassified%2C%20expressed
LOC_Os08g35050	Allelic imprinted PEG	0.244719		biallele	-3.14995	4.42036	4.63896	0.031254	0.36661	0.538462	0.515528	0	0		PEG	-3.16779	4.15934	21.4974	3.54304e-06	0.000125533	0.175487	0.116883	0.104762	0		ARID/BRIGHT DNA-binding domain containing protein, expressed
LOC_Os08g40350	Allelic imprinted MEG	1		MEG	8.75699	3.33599	34.0892	5.26432e-09	3.80842e-07	1	1	1	1		biallele	8.8212	2.96325	23.9361	9.95866e-07	3.20365e-05	1	1	NA	NA		expressed protein
LOC_Os08g40620	Locus-imprinted PEG	1		PEG	-5.5041	5.63233	21.703	3.18299e-06	0.00014136	0.177419	0.0194175	0	0.0022779		PEG	-3.25677	3.12271	17.1662	3.42479e-05	0.0010111	0.0952381	0.259259	0.0378378	0.0652174		rabGAP/TBC domain-containing protein, putative, expressed
LOC_Os08g40820	Unclassified PEG	1		PEG	-3.81423	5.67966	37.6755	8.35487e-10	6.45303e-08	0.126437	0.121495	0.05	0.00392157		unknown	n.d.	n.d.	n.d.	n.d.	n.d.	n.d.	n.d.	n.d.	n.d.		expressed protein
LOC_Os08g41700	Allelic imprinted PEG	1		biallele	-5.11432	3.06183	8.54671	0.00346148	0.0730107	1	0	0	0		PEG	-5.36604	2.24444	15.5721	7.94173e-05	0.0021964	0	0.230769	0	0		expressed protein
LOC_Os08g41710	Locus-imprinted PEG	1		PEG	-5.21585	6.8499	53.119	3.13934e-13	3.69057e-11	0.134912	0.0246085	0.00486618	0.00872939		PEG	-5.93734	6.5458	83.4882	6.4099e-20	8.76084e-18	0.040367	0.0304302	0.0107362	0		FHA domain containing protein, putative, expressed
LOC_Os08g41790	Unclassified PEG	1		unknown	n.d.	n.d.	n.d.	n.d.	n.d.	n.d.	n.d.	n.d.	n.d.		PEG	-7.41755	4.22785	67.6296	1.97283e-16	2.19828e-14	0.0214592	0	0	0		phosphoribulokinase/Uridine kinase family protein, expressed
LOC_Os08g42640	Locus-imprinted PEG	1		PEG	-4.86091	4.39368	23.6927	1.13012e-06	5.47525e-05	0.179039	0.0196078	0	0.00699301		PEG	-4.46734	3.7298	34.1909	4.9961e-09	2.57802e-07	0.0780142	0.0341463	0.0580645	0		zinc finger, C3HC4 type domain containing protein, expressed
LOC_Os08g42980	Allelic imprinted PEG	1		biallele	-2.15626	4.18131	5.2851	0.0215087	0.280033	0.354167	0.59633	0.0410959	0.0463576		PEG	-2.18592	6.22203	41.978	9.23063e-11	5.74653e-09	0.18413	0.157062	0.224299	0.126609		la domain containing protein, expressed
LOC_Os08g43380	Unclassified PEG	1		unknown	n.d.	n.d.	n.d.	n.d.	n.d.	n.d.	n.d.	n.d.	n.d.		PEG	-3.43594	4.60751	38.364	5.87059e-10	3.38098e-08	0.0844687	0.0495627	0.046875	0.151786		TBC domain containing protein, expressed
LOC_Os08g44170	Unclassified MEG	1		unknown	n.d.	n.d.	n.d.	n.d.	n.d.	n.d.	n.d.	n.d.	n.d.		MEG	8.12573	2.19614	27.3136	1.72986e-07	6.55174e-06	1	1	1	1		transposon%20protein%2C%20putative%2C%20unclassified%2C%20expressed
LOC_Os08g44180	Allelic imprinted MEG	1		biallele	4.41358	3.8729	12.461	0.000415538	0.0111097	1	1	1	0.690909		MEG	2.16735	3.52377	13.4549	0.000244372	0.00449486	0.818182	0.851852	0.747899	0.765957		expressed protein
LOC_Os08g45130	Locus-imprinted PEG	1		PEG	-2.78076	3.68129	12.729	0.000360021	0.010334	0.295775	0.121622	0.153846	0.0309278		PEG	-4.19443	3.7098	26.8607	2.1866e-07	9.06292e-06	0.148148	0.00518135	0.04	0.0229008		histone-lysine N-methyltransferase, putative, expressed
LOC_Os09g01780	Unclassified MEG	1		unknown	n.d.	n.d.	n.d.	n.d.	n.d.	n.d.	n.d.	n.d.	n.d.		MEG	7.88149	1.98885	24.0386	9.44235e-07	3.05674e-05	1	1	1	1		transposon%20protein%2C%20putative%2C%20unclassified%2C%20expressed
LOC_Os09g02690	Locus-imprinted MEG	1		MEG	9.9929	6.37647	164.654	1.08851e-37	1.16021e-34	1	1	0.9975	1		MEG	5.66431	5.46511	67.9886	1.64446e-16	1.74392e-14	0.955307	0.946903	1	0.985294		expressed protein
LOC_Os09g02780	Locus-imprinted PEG	1		PEG	-6.62397	7.7412	97.505	5.37209e-23	1.99742e-20	0.0174419	0.0111259	0	0		PEG	-5.75173	6.82946	149.937	1.78963e-34	6.71198e-32	0.0286992	0.0190597	0.0125313	0		OsMADS77 - MADS-box family gene with M-alpha type-box, expressed
LOC_Os09g02790	Locus-imprinted PEG	1		PEG	-5.38535	5.17936	67.5906	2.01223e-16	3.4593e-14	0.0433145	0.0346232	0	0		PEG	-4.78058	5.74757	127.172	1.70312e-29	4.09201e-27	0.0347003	0.0426309	0.0259965	0.0289389		zinc-binding protein, putative, expressed
LOC_Os09g03080	Allelic imprinted PEG	1		biallele	-2.81603	5.72565	7.0928	0.00773944	0.136727	0.00655738	0.0492813	0.68	0.190476		PEG	-3.67558	5.60599	27.5821	1.50562e-07	6.37794e-06	0.0194553	0.0290698	0.15534	0.206897		conserved hypothetical protein
LOC_Os09g03090	Locus-imprinted PEG	1		PEG	-8.21872	5.09882	103.769	2.27278e-24	9.56242e-22	0	0	0.0108303	0		PEG	-9.2103	4.36137	100.368	1.26576e-23	2.3171e-21	0.002849	0	0	0		expressed protein
LOC_Os09g03500	Locus-imprinted MEG	1		MEG	8.26351	7.09566	174.496	7.71541e-40	8.811e-37	1	0.984375	1	0.997301		MEG	7.61558	6.38967	156.638	6.13992e-36	2.6226e-33	0.985447	0.988996	1	1		ZOS9-01 - C2H2 zinc finger protein, expressed
LOC_Os09g03630	Locus-imprinted PEG	1		PEG	-5.21101	4.68158	17.2755	3.2333e-05	0.00121063	0.292929	0.0810811	0	0		PEG	-5.88161	4.42154	20.3972	6.29219e-06	0.000211256	0.194805	0.00540541	0	0		ankyrin, putative, expressed
LOC_Os09g06910	Unclassified MEG	1		unknown	n.d.	n.d.	n.d.	n.d.	n.d.	n.d.	n.d.	n.d.	n.d.		MEG	6.72134	2.66959	32.4715	1.20951e-08	5.42236e-07	1	1	0.962264	1		retrotransposon%20protein%2C%20putative%2C%20unclassified%2C%20expressed
LOC_Os09g06950	Allelic imprinted MEG	1		biallele	7.22179	2.36804	9.24917	0.00235603	0.0466999	1	1	NA	NA		MEG	8.38386	4.16423	61.5584	4.29805e-15	4.00552e-13	1	1	1	0.995261		expressed protein
LOC_Os09g07940	Allelic imprinted MEG	1		biallele	4.24688	5.08566	8.8702	0.00289863	0.0554346	0.972851	0.614213	1	1		MEG	4.43687	4.32238	29.3471	6.05063e-08	2.45489e-06	0.914729	0.846154	0.985612	1		retrotransposon%20protein%2C%20putative%2C%20unclassified%2C%20expressed
LOC_Os09g08000	Locus-imprinted MEG	1		MEG	8.46131	3.12946	27.2239	1.81208e-07	1.00946e-05	1	1	1	1		MEG	2.7808	3.94631	15.9852	6.38385e-05	0.00141244	0.824451	0.797333	1	1		expressed protein
LOC_Os09g08300	Allelic imprinted MEG	1		biallele	2.81112	6.08947	17.5203	2.84252e-05	0.00105118	0.957219	0.969278	0.583596	0.669725		MEG	2.29722	7.1354	56.2149	6.49686e-14	5.28583e-12	0.745718	0.822562	0.884615	0.786632		expressed protein
LOC_Os09g09350	Allelic imprinted MEG	1		biallele	7.6467	2.59248	14.5567	0.000136007	0.00417365	1	1	1	NA		MEG	8.34882	2.43333	30.7307	2.96444e-08	1.26272e-06	1	1	1	1		expressed protein
LOC_Os09g11380	Locus-imprinted MEG	1		MEG	7.5425	4.72252	67.5411	2.06338e-16	4.28433e-14	1	1	1	0.985348		MEG	5.83542	4.27761	50.1847	1.39932e-12	9.82529e-11	0.980198	0.931034	0.993548	1		expressed protein
LOC_Os09g11900	Allelic imprinted MEG	1		biallele	4.26189	0.50042	3.04915	0.0807793	0.544018	NA	1	NA	NA		MEG	6.14079	2.71819	25.8051	3.77684e-07	1.33817e-05	0.962963	1	1	1		expressed protein
LOC_Os09g14680	Unclassified PEG	1		unknown	n.d.	n.d.	n.d.	n.d.	n.d.	n.d.	n.d.	n.d.	n.d.		PEG	-5.96176	2.87874	25.3806	4.70624e-07	1.89445e-05	0.0652174	0	0	0		expressed protein
LOC_Os09g16520	Allelic imprinted PEG	0.19601		biallele	-4.91585	4.16663	20.8933	4.85584e-06	0.00021154	0.0584615	0.461538	0	0.00729927		PEG	-6.35831	3.59452	33.9658	5.60888e-09	2.86537e-07	0.037037	0	0	0		cytochrome b5-like Heme/Steroid binding domain containing protein, expressed
LOC_Os09g17800	Allelic imprinted MEG	1		biallele	5.04895	0.789179	5.40239	0.0201092	0.231133	1	1	NA	NA		MEG	6.88157	1.20403	15.3942	8.72571e-05	0.0018355	1	1	1	1		retrotransposon%20protein%2C%20putative%2C%20unclassified%2C%20expressed
LOC_Os09g20010	Locus-imprinted PEG	1		PEG	-5.46689	6.58019	69.0607	9.54774e-17	1.75459e-14	0.00127714	0.037464	0.0131737	0.0333778		PEG	-5.27144	6.10091	153.122	3.60268e-35	1.42047e-32	0.0297767	0.0404984	0.0201511	0.0130095		SNF1-related protein kinase regulatory subunit beta-2, putative, expressed
LOC_Os09g20340	Unclassified PEG	1		unknown	n.d.	n.d.	n.d.	n.d.	n.d.	n.d.	n.d.	n.d.	n.d.		PEG	-1.54503	7.37929	36.2591	1.7275e-09	9.41977e-08	0.261013	0.256891	0.230237	0.233065		DUF630/DUF632 domains containing protein, putative, expressed
LOC_Os09g20650	Locus-imprinted PEG	1		PEG	-3.09194	4.44749	18.42	1.77187e-05	0.000702944	0.253112	0.157895	0.0718954	0.017341		PEG	-3.54487	3.43142	12.2917	0.000454985	0.010319	0.259843	0.277778	0.0175439	0.00578035		OsFBX323 - F-box domain containing protein, expressed
LOC_Os09g23690	Locus-imprinted PEG	1		PEG	-3.35987	4.72285	35.2216	2.94239e-09	2.10955e-07	0.0987124	0.0738916	0.0857143	0.0909091		PEG	-3.56729	4.98923	58.0257	2.58721e-14	2.28641e-12	0.0831234	0.101449	0.0506667	0.0657596		UBX domain containing protein, expressed
LOC_Os09g25160	Unclassified MEG	1		unknown	n.d.	n.d.	n.d.	n.d.	n.d.	n.d.	n.d.	n.d.	n.d.		MEG	8.67229	2.68823	38.6664	5.02792e-10	2.83203e-08	1	1	1	1		retrotransposon%20protein%2C%20putative%2C%20unclassified%2C%20expressed
LOC_Os09g25170	Unclassified MEG	1		unknown	n.d.	n.d.	n.d.	n.d.	n.d.	n.d.	n.d.	n.d.	n.d.		MEG	8.08535	2.20818	24.7724	6.45151e-07	2.17554e-05	1	1	1	1		retrotransposon%20protein%2C%20putative%2C%20unclassified%2C%20expressed
LOC_Os09g26470	Locus-imprinted MEG	1		MEG	8.1369	6.84803	144.027	3.50585e-33	2.5478e-30	0.997691	0.991957	1	1		MEG	7.56103	5.78014	168.42	1.63752e-38	8.12263e-36	0.994178	1	0.991241	0.991837		zinc finger, C3HC4 type family protein, expressed
LOC_Os09g27960	Allelic imprinted MEG	1		biallele	-2.17082	1.89268	1.40272	0.236269	0.881432	0.16129	0.761905	0	0		MEG	3.92806	1.03426	9.15198	0.0024845	0.0318102	0.92	1	1	0.882353		transmembrane protein 50A, putative, expressed
LOC_Os09g28940	Allelic imprinted PEG	1		biallele	-5.447	2.99999	12.0874	0.000507636	0.0140417	0.571429	0	0	0		PEG	-6.87473	3.36663	50.4992	1.19214e-12	8.72932e-11	0.0075188	0.0188679	0	0		ubiquitin carboxyl-terminal hydrolase domain containing protein, expressed
LOC_Os09g29050	Locus-imprinted PEG	1		PEG	-3.2897	3.34179	11.9347	0.00055098	0.0150458	0.0864198	0.0701754	0	0.153846		PEG	-4.40492	2.72316	22.0583	2.64494e-06	9.54724e-05	0.047619	0.0852713	0.0204082	0.0136986		mitochondrial carrier protein, putative, expressed
LOC_Os09g32210	Allelic imprinted MEG	1		biallele	1.75824	7.89619	7.83181	0.00513347	0.0864846	0.737659	0.965517	0.786848	0.704423		MEG	2.39044	4.7474	20.6048	5.64532e-06	0.000158698	0.933333	0.842105	0.7343	0.769759		pumilio-family RNA binding repeat containing protein, expressed
LOC_Os09g32330	Unclassified MEG	0.250277		unknown	n.d.	n.d.	n.d.	n.d.	n.d.	n.d.	n.d.	n.d.	n.d.		MEG	4.93372	-0.116474	9.29536	0.00229735	0.0299219	1	1	1	1		expressed protein
LOC_Os09g32540	Allelic imprinted PEG	0.203624		biallele	-2.21847	4.33347	8.11899	0.0043804	0.0875885	0.512397	0.149254	0.0344828	0.102941		PEG	-2.87188	4.01304	21.7608	3.08846e-06	0.000110961	0.207547	0.08	0.122449	0.05		expressed protein
LOC_Os09g32750	Locus-imprinted PEG	1		PEG	-3.29654	3.92952	13.0448	0.000304128	0.00893824	0.05	0	0.169591	0.172414		PEG	-5.51644	2.60749	21.6623	3.25126e-06	0.000116267	0	0	0.0630631	0		FHA domain containing protein, putative, expressed
LOC_Os09g34880	Locus-imprinted MEG	1		MEG	10.7828	7.17652	238.817	7.12178e-54	2.83664e-50	1	1	0.99816	1		MEG	7.44004	6.19	178.809	8.82004e-41	4.67675e-38	0.996165	0.998093	1	0.978691		basic region leucine zipper domain containing protein, expressed
LOC_Os09g34950	Locus-imprinted PEG	1		PEG	-4.52771	4.12207	30.336	3.6332e-08	2.17557e-06	0.0769231	0.0381679	0.037037	0		PEG	-7.72018	2.89694	43.825	3.59092e-11	2.29118e-09	0.010989	0	0	0		TCP family transcription factor, putative, expressed
LOC_Os09g35600	Locus-imprinted MEG	1		MEG	6.20369	6.74831	88.3579	5.46216e-21	1.6794e-18	1	0.976828	0.993377	0.973615		MEG	4.72578	6.36524	85.2398	2.64288e-20	3.90765e-18	0.98004	0.98567	0.937589	0.890365		MATE domain containing protein, expressed
LOC_Os09g35850	Unclassified PEG	1		PEG	-5.91049	5.71916	52.3512	4.64114e-13	5.377e-11	0	0.00796813	0.0646154	0.015		unknown	n.d.	n.d.	n.d.	n.d.	n.d.	n.d.	n.d.	n.d.	n.d.		RNA recognition motif containing protein, putative, expressed
LOC_Os09g36470	Allelic imprinted MEG	1		MEG	4.5494	5.65627	42.5877	6.75843e-11	6.1745e-09	0.930303	0.990196	0.952569	0.97619		biallele	2.89206	4.51189	11.4302	0.000722588	0.0114313	0.988669	0.943182	0.804348	0.4375		retrotransposon%20protein%2C%20putative%2C%20unclassified%2C%20expressed
LOC_Os09g36970	Locus-imprinted MEG	1		MEG	8.92219	5.33528	106.518	5.67732e-25	2.66968e-22	0.995413	1	1	1		MEG	10.866	4.76106	120.899	4.02152e-28	8.83414e-26	1	1	1	1		expressed protein
LOC_Os09g38268	Allelic imprinted PEG	1		biallele	-2.08281	2.67984	2.40112	0.121248	0.814747	0.142857	0	0.5	0.307692		PEG	-4.14648	2.50557	10.4034	0.00125781	0.0247966	0	0	0.222222	0.0285714		RNA polymerase IV largest subunit, putative, expressed
LOC_Os10g01380	Allelic imprinted MEG	1		biallele	2.57623	3.51418	4.97886	0.0256588	0.268829	1	0.405405	1	0.89404		MEG	5.20606	2.61295	19.039	1.28071e-05	0.000333789	1	0.818182	1	1		CW7, putative, expressed
LOC_Os10g01480	Locus-imprinted PEG	1		PEG	-4.40897	6.10453	37.4738	9.26507e-10	7.05381e-08	0.139738	0.0462963	0.004329	0.0280374		PEG	-5.81626	5.37101	38.8982	4.46502e-10	2.59089e-08	0.0853659	0.0670927	0.0031348	0		Inositol 1, 3, 4-trisphosphate 5/6-kinase, putative, expressed
LOC_Os10g03870	Locus-imprinted MEG	1		MEG	3.6785	4.09731	16.6255	4.55343e-05	0.0015965	1	0.849462	1	0.847134		MEG	5.54218	5.08387	79.0171	6.15757e-19	7.8252e-17	0.975309	0.958042	0.972527	1		OsFBX353 - F-box domain containing protein, expressed
LOC_Os10g04860	Allelic imprinted PEG	1		biallele	-1.77107	6.43593	21.3098	3.90739e-06	0.000171154	0.18863	0.325	0.179924	0.226488		PEG	-1.51659	5.82631	18.9212	1.36231e-05	0.000431923	0.229814	0.26747	0.223529	0.277533		aldehyde oxidase, putative, expressed
LOC_Os10g04890	Locus-imprinted PEG	1		PEG	-9.94045	5.93027	142.52	7.48364e-33	6.64714e-30	0	0	0	0.00160514		PEG	-11.5568	5.45411	193.859	4.5712e-44	3.19506e-41	0	0	0	0		expressed protein
LOC_Os10g04980	Locus-imprinted PEG	1		PEG	-7.96272	5.00299	89.5829	2.94056e-21	9.04108e-19	0.0188679	0	0	0		PEG	-3.81163	2.86392	17.1656	3.42579e-05	0.0010111	0.115385	0.105263	0.0769231	0		OsFBX365 - F-box domain containing protein, expressed
LOC_Os10g05500	Locus-imprinted PEG	1		PEG	-9.11021	7.03514	240.416	3.19176e-54	2.55149e-50	0.0015625	0.00165289	0.00387097	0		PEG	-8.16486	5.75721	205.754	1.15941e-46	1.04872e-43	0.00480769	0.00445434	0	0.00192678		OsFBX370 - F-box domain containing protein, expressed
LOC_Os10g05520	Locus-imprinted PEG	1		PEG	-7.9905	2.61736	27.1994	1.83512e-07	9.81267e-06	0	0	0	0		PEG	-9.14769	3.01197	50.9293	9.57542e-13	7.1131e-11	0	0	0	0		OsFBX371 - F-box domain containing protein, expressed
LOC_Os10g05540	Allelic imprinted PEG	1		biallele	-1.53547	1.57712	0.545097	0.460328	1	0.586207	NA	0.117647	0		PEG	-5.72994	1.51442	15.8396	6.89451e-05	0.00193462	0.037037	0	0	0		OsFBX373 - F-box domain containing protein, expressed
LOC_Os10g05800	Allelic imprinted PEG	1		PEG	-1.60823	7.03935	17.8438	2.39802e-05	0.000921623	0.253205	0.172117	0.28125	0.283069		biallele	-0.796931	7.44671	6.71993	0.00953411	0.13537	0.283	0.27372	0.457609	0.415584		F-box protein family, AtFBL4, putative, expressed
LOC_Os10g11260	Locus-imprinted PEG	1		PEG	-5.35064	3.66148	20.3873	6.32489e-06	0.000270381	0.137931	0.0588235	0	0		PEG	-4.72512	2.8193	25.0629	5.54914e-07	2.20489e-05	0.0909091	0	0.00740741	0.046875		ubiquitin-conjugating enzyme, putative, expressed
LOC_Os10g11580	Locus-imprinted MEG	1		MEG	4.46976	6.28829	12.2391	0.000467976	0.0123465	0.753846	1	0.983299	1		MEG	5.27089	6.73943	33.8002	6.10715e-09	2.87185e-07	0.906977	0.837456	0.994934	0.99601		histone-like transcription factor and archaeal histone, putative, expressed
LOC_Os10g19860	Allelic imprinted PEG	1		biallele	-1.79733	6.66981	25.1892	5.19736e-07	2.64635e-05	0.309317	0.217877	0.206799	0.171192		PEG	-1.68094	6.34836	24.4169	7.75852e-07	3.0127e-05	0.299124	0.273399	0.129904	0.225754		XI-I, putative, expressed
LOC_Os10g20960	Locus-imprinted PEG	1		PEG	-2.339	4.75918	14.3685	0.000150294	0.00480579	0.16129	0.107692	0.225316	0.129534		PEG	-2.76057	3.11629	11.6231	0.000651389	0.0140878	0	0.166667	0.10917	0.252033		retrotransposon%20protein%2C%20putative%2C%20unclassified%2C%20expressed
LOC_Os10g25180	Allelic imprinted MEG	1		biallele	2.02818	7.83438	4.44782	0.0349457	0.327883	0.48785	0.478599	0.952078	0.924011		MEG	4.03147	7.00973	66.1658	4.1455e-16	4.19378e-14	0.8998	0.868583	0.936476	0.986367		phosphoinositide phosphatase family protein, putative, expressed
LOC_Os10g26520	Locus-imprinted PEG	1		PEG	-3.55581	2.73702	9.6564	0.00188693	0.044365	0.121951	0.191489	0	0.0666667		PEG	-3.69942	3.32275	23.7742	1.08325e-06	4.14357e-05	0.121495	0.0212766	0.0289017	0.113208		protein kinase domain containing protein, expressed
LOC_Os10g27370	Locus-imprinted MEG	1		MEG	8.92524	3.50685	43.4442	4.36217e-11	4.05479e-09	1	1	1	1		MEG	9.76693	3.69819	71.8328	2.34232e-17	2.65427e-15	1	1	1	1		transposon%20protein%2C%20putative%2C%20Pong%20sub-class%2C%20expressed
LOC_Os10g27380	Allelic imprinted MEG	1		biallele	0.416197	4.54752	0.313021	0.575832	1	0.85124	0.567961	0.777778	0.238095		MEG	1.9446	4.34982	13.1582	0.000286271	0.00514852	0.750663	0.770115	0.837838	0.765517		expressed protein
LOC_Os10g31330	Unclassified MEG	1		unknown	n.d.	n.d.	n.d.	n.d.	n.d.	n.d.	n.d.	n.d.	n.d.		MEG	6.57162	1.01828	10.6787	0.00108374	0.0160856	1	1	1	1		retrotransposon%20protein%2C%20putative%2C%20unclassified%2C%20expressed
LOC_Os10g33670	Allelic imprinted MEG	1		biallele	0.192248	3.95396	0.0608936	0.805089	1	0.414634	0.657143	0.6	0.536585		MEG	2.25853	3.21753	11.095	0.000865586	0.0132835	0.782609	0.75	0.86014	0.820513		expressed protein
LOC_Os10g33930	Allelic imprinted PEG	1		biallele	-1.40675	5.01189	5.89289	0.0152022	0.223189	0.171103	0.174129	0.454545	0.34058		PEG	-3.21253	3.71731	22.4299	2.1796e-06	7.99898e-05	0.194805	0.130952	0.0693069	0.037037		DUF1336 domain containing protein, expressed
LOC_Os10g35220	Allelic imprinted PEG	1		biallele	-1.59021	6.18394	15.0605	0.000104119	0.00348254	0.380282	0.28	0.226576	0.135286		PEG	-1.92636	5.75513	30.412	3.49369e-08	1.59414e-06	0.242254	0.220779	0.193662	0.148581		KH domain containing protein, putative, expressed
LOC_Os10g36710	Locus-imprinted PEG	1		PEG	-4.24364	4.86715	24.493	7.45806e-07	3.72623e-05	0.0570571	0	0.140351	0.05		PEG	-6.14571	5.88011	85.5294	2.28286e-20	3.25033e-18	0.0131712	0.000903342	0.0394089	0.00980392		CAMK CAMK like.40 - CAMK includes calcium/calmodulin depedent protein kinases, expressed
LOC_Os10g36860	Allelic imprinted MEG	1		biallele	0.895904	2.9472	1.19448	0.274427	0.917896	0.632653	0.695652	0.694915	0.491525		MEG	6.93393	1.19406	16.8392	4.06851e-05	0.000958063	1	1	1	1		CRS1/YhbY domain containing protein, expressed
LOC_Os10g37540	Locus-imprinted PEG	1		PEG	-6.66923	6.54313	123.031	1.37255e-28	8.1275e-26	0.0313676	0.0102489	0.00735294	0		PEG	-5.7559	6.28946	132.56	1.12855e-30	3.09889e-28	0.00958466	0.0236559	0.00460829	0.0316901		OsFBDUF48 - F-box and DUF domain containing protein, expressed
LOC_Os10g39780	Locus-imprinted PEG	1		PEG	-4.71777	6.07152	33.8033	6.09767e-09	4.11348e-07	0.162861	0.127182	0.00469484	0.00616016		PEG	-4.31799	5.54472	61.1735	5.22601e-15	4.90002e-13	0.0890688	0.0960187	0.00984529	0.0312966		protein phosphatase 2C, putative, expressed
LOC_Os10g42690	Locus-imprinted PEG	1		PEG	-3.08719	3.81676	13.6262	0.000223051	0.00680561	0.207921	0.181102	0.106383	0		PEG	-3.25332	3.5839	15.7046	7.40448e-05	0.00205893	0.181818	0.04	0	0.163636		jmjC domain containing protein, expressed
LOC_Os11g03220	Allelic imprinted MEG	1		biallele	4.32784	6.14246	10.7526	0.00104133	0.0241989	0.609756	0.744	0.995914	0.99682		MEG	5.27936	5.81085	15.6033	7.81174e-05	0.00167067	0.777778	0.777778	0.998084	1		RNA binding protein, putative, expressed
LOC_Os11g03900	Allelic imprinted PEG	1		biallele	-2.18141	2.69439	2.9888	0.0838421	0.654525	0.0461538	0.0588235	0.542857	0.333333		PEG	-2.0684	3.65953	11.1296	0.000849627	0.0176789	0.294872	0.170569	0.2	0.0985915		glucosamine--fructose-6-phosphate aminotransferase 1, putative, expressed
LOC_Os11g05010	Locus-imprinted PEG	1		PEG	-2.77603	7.1152	28.6255	8.78174e-08	4.97881e-06	0.225397	0.0555556	0.15	0.0548054		PEG	-4.01947	4.91686	38.4561	5.59993e-10	3.23722e-08	0.0859107	0.0109091	0.0205761	0.107477		heavy-metal-associated domain-containing protein, putative, expressed
LOC_Os11g06070	Unclassified PEG	1		PEG	-2.8513	4.22221	14.9797	0.000108671	0.00359718	0.121212	0.261538	0.0652174	0.0552147		unknown	n.d.	n.d.	n.d.	n.d.	n.d.	n.d.	n.d.	n.d.	n.d.		expressed protein
LOC_Os11g06580	Allelic imprinted PEG	1		biallele	-3.73662	2.3968	5.98003	0.0144687	0.215588	0.123288	0.565217	0	0		PEG	-4.32037	2.57262	14.2356	0.000161287	0.00415429	0.135802	0	0.029703	0		OsFBX397 - F-box domain containing protein, expressed
LOC_Os11g07910	Locus-imprinted PEG	1		PEG	-3.91855	6.35251	36.9958	1.18382e-09	8.84438e-08	0.221636	0.0141207	0.0228137	0.0439367		PEG	-5.01337	6.05127	62.8338	2.2491e-15	2.18889e-13	0.0222694	0.00478469	0.0929853	0.0238806		transmembrane 9 superfamily member, putative, expressed
LOC_Os11g08410	Allelic imprinted PEG	1		PEG	-3.04305	4.41073	22.8945	1.71137e-06	8.07122e-05	0.12782	0.183432	0.0493274	0.0909091		biallele	-2.88411	2.1328	2.72008	0.099093	0.701544	0.8	0.25	0.047619	0		GATA zinc finger domain containing protein, expressed
LOC_Os11g09329	Allelic imprinted PEG	1		PEG	-4.89151	4.52537	33.662	6.55705e-09	4.38636e-07	0.00909091	0.106796	0.0502793	0		biallele	-2.20469	7.45445	7.94982	0.00480921	0.0775169	0.0655903	0.0246984	0.458893	0.466608		VHS and GAT domain containing protein, expressed
LOC_Os11g10060	Allelic imprinted PEG	1		biallele	-1.841	4.80379	8.24563	0.00408502	0.0834116	0.35	0.078125	0.126904	0.23511		PEG	-1.98292	3.90116	11.3621	0.000749565	0.0158761	0.190476	0.101796	0.211823	0.296296		transcriptional corepressor SEUSS, putative, expressed
LOC_Os11g10070	Locus-imprinted PEG	1		PEG	-1.63204	6.61888	13.0763	0.00029905	0.00882143	0.278212	0.0987868	0.297297	0.287327		PEG	-2.30114	5.46247	30.4133	3.4913e-08	1.59414e-06	0.143396	0.115865	0.186858	0.208406		transcriptional corepressor SEUSS, putative, expressed
LOC_Os11g11180	Unclassified MEG	1		MEG	6.36096	1.59837	9.11548	0.00253455	0.0497819	1	1	1	1		unknown	n.d.	n.d.	n.d.	n.d.	n.d.	n.d.	n.d.	n.d.	n.d.		expressed protein
LOC_Os11g11200	Locus-imprinted MEG	1		MEG	8.32147	2.94153	27.3396	1.70678e-07	9.57472e-06	1	1	1	1		MEG	6.68131	1.10257	14.0728	0.000175865	0.00335934	1	1	1	1		expressed protein
LOC_Os11g13930	Unclassified MEG	1		unknown	n.d.	n.d.	n.d.	n.d.	n.d.	n.d.	n.d.	n.d.	n.d.		MEG	4.52255	5.76159	48.9337	2.64759e-12	1.79348e-10	0.870445	0.92	0.961588	0.995638		ZF-HD protein dimerisation region containing protein, expressed
LOC_Os11g15620	Unclassified MEG	1		unknown	n.d.	n.d.	n.d.	n.d.	n.d.	n.d.	n.d.	n.d.	n.d.		MEG	10.7639	4.66128	117.656	2.06234e-27	4.40453e-25	1	1	1	1		OsFBX420 - F-box domain containing protein, expressed
LOC_Os11g18170	Allelic imprinted PEG	1		biallele	1.50825	3.15447	2.24504	0.134043	0.852798	1	0.809524	0.676471	0.470588		PEG	-2.71038	2.35961	9.38027	0.00219334	0.0401511	0.2	0.0526316	0.225806	0.0434783		glutathione peroxidase, putative, expressed
LOC_Os11g23050	Unclassified MEG	1		unknown	n.d.	n.d.	n.d.	n.d.	n.d.	n.d.	n.d.	n.d.	n.d.		MEG	6.92777	1.22725	16.2056	5.68247e-05	0.00128122	1	1	1	1		expressed protein
LOC_Os11g24120	Unclassified MEG	1		MEG	10.1354	4.68776	50.0346	1.51058e-12	1.8436e-10	1	1	1	1		unknown	n.d.	n.d.	n.d.	n.d.	n.d.	n.d.	n.d.	n.d.	n.d.		expressed protein
LOC_Os11g26830	Allelic imprinted MEG	1		biallele	4.50703	3.69725	10.9246	0.000948942	0.0225099	1	1	1	0.657143		MEG	5.86638	4.7815	61.635	4.13398e-15	3.89242e-13	1	1	0.960265	0.943038		ATP-binding region, ATPase-like domain containing protein, expressed
LOC_Os11g27470	Locus-imprinted MEG	1		MEG	5.07125	7.76523	38.6265	5.13176e-10	4.38752e-08	1	0.988178	0.877608	0.880248		MEG	4.73606	7.80642	100.816	1.00918e-23	1.80444e-21	0.98885	0.980897	0.897352	0.908863		expressed protein
LOC_Os11g30220	Allelic imprinted MEG	1		biallele	6.71468	4.11061	18.4752	1.72132e-05	0.000671231	1	1	0	NA		MEG	7.10207	3.08245	29.4774	5.65717e-08	2.30133e-06	0.99278	1	1	1		hypothetical protein
LOC_Os11g31330	Locus-imprinted PEG	0.0777718		PEG	-6.2795	7.97386	75.2258	4.19845e-18	9.32289e-16	0.0238957	0.00429185	0.00630252	0.0101523		PEG	-5.85667	8.61755	155.343	1.17838e-35	5.03332e-33	0.0315091	0.0237288	0.00837673	0.00972557		no apical meristem protein, putative, expressed
LOC_Os11g31340	Locus-imprinted PEG	1		PEG	-9.71071	6.36691	104.215	1.81511e-24	8.06109e-22	0	0.0222222	0	0.000821693		PEG	-8.17874	6.85368	251.365	1.30899e-56	4.02566e-53	0.0030426	0.00984898	0.000848176	0		no apical meristem protein, putative, expressed
LOC_Os11g31360	Locus-imprinted PEG	1		PEG	-8.87903	7.45744	181.693	2.06907e-41	3.0073e-38	0	0.0013986	0.00321543	0.00851064		PEG	-8.61174	8.50896	407.616	1.21096e-90	9.31043e-87	0.00215517	0.00195838	0.00791557	0		no apical meristem protein, putative, expressed
LOC_Os11g31380	Locus-imprinted PEG	1		PEG	-6.43209	5.08827	60.8361	6.2031e-15	9.01592e-13	0.0427807	0	0	0.00613497		PEG	-9.12798	5.29338	133.075	8.70511e-31	2.47886e-28	0	0	0.010101	0.0126582		no apical meristem protein, putative, expressed
LOC_Os11g31600	Locus-imprinted MEG	1		MEG	7.32565	2.13049	15.9745	6.42004e-05	0.00217465	1	1	1	1		MEG	7.94197	2.02452	23.0732	1.55949e-06	4.86417e-05	1	1	1	1		hypothetical protein
LOC_Os11g33100	Allelic imprinted MEG	1		biallele	0.64647	3.23198	0.61334	0.433533	1	0.918919	0.471264	0.607143	0.413793		MEG	3.68193	1.47382	8.57255	0.00341268	0.0408062	1	0.909091	0.853659	1		SNARE associated Golgi protein, putative, expressed
LOC_Os11g34190	Locus-imprinted PEG	1		PEG	-2.45719	6.69284	19.456	1.02944e-05	0.000427499	0.0764706	0.0794078	0.266156	0.284497		PEG	-3.55924	6.06347	70.8757	3.80461e-17	4.43209e-15	0.0788913	0.0337922	0.106447	0.0857788		expressed protein
LOC_Os11g36470	Locus-imprinted PEG	1		PEG	-3.3449	7.77881	63.5734	1.54501e-15	2.42172e-13	0.20979	0.0914729	0.0446359	0.0608219		PEG	-3.74986	7.28585	147.739	5.40853e-34	1.93411e-31	0.104478	0.0729927	0.0411322	0.0562103		ubiquitin carboxyl-terminal hydrolase 21, putative, expressed
LOC_Os11g36760	Allelic imprinted MEG	1		MEG	3.07326	7.47536	33.9456	5.66735e-09	4.08151e-07	0.864338	0.751921	0.943867	0.934186		biallele	1.93799	6.80996	14.8764	0.000114791	0.00231342	0.631973	0.557038	0.864912	0.913658		transmembrane receptor, putative, expressed
LOC_Os11g36770	Locus-imprinted MEG	1		MEG	8.07639	2.74476	24.6557	6.85403e-07	3.48988e-05	1	1	1	1		MEG	8.23136	2.31765	29.3388	6.07667e-08	2.45897e-06	1	1	1	1		expressed protein
LOC_Os11g37230	Locus-imprinted PEG	1		PEG	-3.63963	5.73067	27.77	1.36625e-07	7.48071e-06	0.221106	0.198777	0.00967118	0.0317125		PEG	-2.51622	4.59079	14.1301	0.000170591	0.00437197	0.220779	0.28	0.172414	0.0176322		zinc finger, C3HC4 type domain containing protein, expressed
LOC_Os11g37520	Allelic imprinted PEG	1		biallele	-2.16132	6.35448	13.9115	0.00019162	0.00591551	0.486125	0.252747	0.0764331	0.061296		PEG	-2.97826	5.55105	36.1317	1.84427e-09	1.0021e-07	0.227273	0.173217	0.0394737	0.0723192		BTBT3 - Bric-a-Brac, Tramtrack, Broad Complex BTB domain with tetratricopeptide repeats, expressed
LOC_Os11g37890	Locus-imprinted PEG	1		PEG	-4.82329	6.88103	114.866	8.42148e-27	4.48809e-24	0.0498849	0.0290237	0.0315315	0.0234742		PEG	-4.77804	7.38592	66.7237	3.12357e-16	3.38247e-14	0.0282935	0.00724638	0.0253388	0.0896092		NAD dependent epimerase/dehydratase family protein, putative, expressed
LOC_Os11g37950	Allelic imprinted MEG	1		biallele	2.78617	1.82088	1.82946	0.176191	0.794847	1	NA	0	1		MEG	8.5758	2.59228	25.8229	3.74216e-07	1.33202e-05	1	1	1	1		WIP3 - Wound-induced protein precursor, expressed
LOC_Os11g38900	Locus-imprinted PEG	1		PEG	-5.3952	6.69742	48.2102	3.82897e-12	3.75568e-10	0.0829268	0.0751592	0	0.00943396		PEG	-5.04076	6.31174	74.0329	7.68247e-18	9.30183e-16	0.0969031	0.0526316	0.0100334	0.00653595		histone-lysine N-methyltransferase, H3 lysine-9 specific SUVH1, putative, expressed
LOC_Os11g38980	Locus-imprinted PEG	1		PEG	-3.23317	6.34432	39.612	3.09774e-10	2.51405e-08	0.136868	0.0414508	0.119534	0.0641201		PEG	-2.99124	7.17651	37.7819	7.91115e-10	4.47242e-08	0.0807947	0.0280932	0.202847	0.19708		F-box/Kelch-repeat protein, putative, expressed
LOC_Os12g02130	Allelic imprinted PEG	1		biallele	-1.2096	5.0985	5.69018	0.0170601	0.240526	0.570732	0.189394	0.251397	0.269841		PEG	-1.9236	5.54318	23.8269	1.05398e-06	4.04164e-05	0.221532	0.169165	0.237705	0.160959		expressed protein
LOC_Os12g02280	Allelic imprinted PEG	1		biallele	-1.02126	1.6062	0.383058	0.535971	1	1	0.176471	0	0.259259		PEG	-2.84557	2.28999	9.49842	0.00205649	0.0379624	0.3	0.0285714	0.146667	0.133333		pentatricopeptide, putative, expressed
LOC_Os12g02440	Allelic imprinted PEG	1		biallele	-2.60844	3.3429	7.28573	0.00695045	0.125564	0.142857	0.0508475	0.0980392	0.578947		PEG	-8.39112	3.56477	71.4966	2.77742e-17	3.26018e-15	0.00729927	0	0	0		WRKY95, expressed
LOC_Os12g02690	Locus-imprinted MEG	1		MEG	3.2756	3.73022	16.3133	5.36858e-05	0.00185384	0.746479	0.98374	0.938776	0.837838		MEG	3.26288	4.59357	20.1728	7.07505e-06	0.000195235	0.897959	0.94086	0.737557	1		expressed protein
LOC_Os12g02970	Unclassified MEG	1		MEG	5.83138	6.068	74.215	7.00569e-18	1.69708e-15	0.948387	0.977925	1	0.984252		unknown	n.d.	n.d.	n.d.	n.d.	n.d.	n.d.	n.d.	n.d.	n.d.		RNA binding protein, putative, expressed
LOC_Os12g03250	Unclassified MEG	1		MEG	9.80811	4.39334	63.4636	1.63355e-15	2.90192e-13	1	1	1	1		unknown	n.d.	n.d.	n.d.	n.d.	n.d.	n.d.	n.d.	n.d.	n.d.		retrotransposon%20protein%2C%20putative%2C%20unclassified%2C%20expressed
LOC_Os12g05040	Locus-imprinted PEG	1		PEG	-3.53887	8.20238	54.6301	1.45493e-13	1.77568e-11	0.163048	0.0656692	0.0626286	0.0341604		PEG	-4.6963	6.9833	164.613	1.11136e-37	5.5127e-35	0.0492108	0.021097	0.036036	0.0332792		heavy-metal-associated domain-containing protein, putative, expressed
LOC_Os12g05700	Unclassified MEG	1		unknown	n.d.	n.d.	n.d.	n.d.	n.d.	n.d.	n.d.	n.d.	n.d.		MEG	8.67612	2.7464	33.7754	6.18555e-09	2.89104e-07	1	1	1	1		transposon%20protein%2C%20putative%2C%20Mutator%20sub-class%2C%20expressed
LOC_Os12g06180	Unclassified PEG	1		PEG	-4.77287	2.97199	16.0845	6.05782e-05	0.0021475	0.0958904	0	0	0.0263158		unknown	n.d.	n.d.	n.d.	n.d.	n.d.	n.d.	n.d.	n.d.	n.d.		HVA22, putative, expressed
LOC_Os12g06480	Unclassified MEG	1		MEG	4.44106	5.07283	49.4652	2.0192e-12	2.40917e-10	1	0.935897	0.923372	0.925676		unknown	n.d.	n.d.	n.d.	n.d.	n.d.	n.d.	n.d.	n.d.	n.d.		PHD-finger family protein, expressed
LOC_Os12g06630	Locus-imprinted PEG	1		PEG	-2.07642	6.50493	25.9454	3.51213e-07	1.81721e-05	0.281553	0.161677	0.185484	0.121255		PEG	-2.4485	5.98476	28.0637	1.17386e-07	5.04201e-06	0.12627	0.0677419	0.131765	0.292074		OsFBT14 - F-box and tubby domain containing protein, expressed
LOC_Os12g07120	Locus-imprinted PEG	1		PEG	-4.53588	6.14833	79.8808	3.97687e-19	9.93471e-17	0.0588235	0.103226	0.0208333	0.0184211		PEG	-4.96128	5.07413	51.2026	8.33102e-13	6.31065e-11	0.0204082	0.0920245	0.0218978	0.00700935		GATA zinc finger domain containing protein, expressed
LOC_Os12g08780	Unclassified PEG	1		unknown	n.d.	n.d.	n.d.	n.d.	n.d.	n.d.	n.d.	n.d.	n.d.		PEG	-6.38845	2.86155	29.2894	6.23345e-08	2.7623e-06	0	0	0.0434783	0		flavin monooxygenase, putative, expressed
LOC_Os12g08810	Unclassified PEG	1		unknown	n.d.	n.d.	n.d.	n.d.	n.d.	n.d.	n.d.	n.d.	n.d.		PEG	-3.36846	7.6938	17.9183	2.30599e-05	0.000706358	0.0372988	0.00759494	0.242236	0.293636		VTC2, putative, expressed
LOC_Os12g10540	Allelic imprinted MEG	0.0423043		biallele	1.10046	1.04231	0.152786	0.695887	1	1	1	0.692308	0.625		MEG	5.10363	0.028232	9.13427	0.00250866	0.0320008	1	1	1	1		OsMADS13 - MADS-box family gene with MIKCc type-box, expressed
LOC_Os12g13390	Allelic imprinted MEG	1		biallele	-0.0878948	5.91852	0.0411653	0.839219	1	0.380117	0.431884	0.43956	0.624434		MEG	3.34783	2.60311	12.0634	0.000514207	0.00860387	1	1	0.818182	0.901639		aspartyl aminopeptidase, putative, expressed
LOC_Os12g13450	Allelic imprinted MEG	1		biallele	6.41517	1.73639	7.42105	0.00644654	0.103585	1	1	NA	NA		MEG	7.74188	1.85396	23.9452	9.9115e-07	3.19516e-05	1	1	1	1		retrotransposon%20protein%2C%20putative%2C%20unclassified%2C%20expressed
LOC_Os12g15980	Locus-imprinted MEG	1		MEG	9.30315	3.84594	52.8507	3.59899e-13	4.71644e-11	1	1	1	1		MEG	3.19032	3.27715	14.83	0.000117648	0.00236172	0.847619	0.790055	0.904762	1		expressed protein
LOC_Os12g16600	Unclassified MEG	1		MEG	8.70251	3.28389	35.5666	2.46481e-09	1.88552e-07	1	1	1	1		unknown	n.d.	n.d.	n.d.	n.d.	n.d.	n.d.	n.d.	n.d.	n.d.		expressed protein
LOC_Os12g17670	Unclassified MEG	0.158798		unknown	n.d.	n.d.	n.d.	n.d.	n.d.	n.d.	n.d.	n.d.	n.d.		MEG	5.9306	0.46716	12.0112	0.000528825	0.00882976	1	1	1	1		expressed protein
LOC_Os12g17710	Locus-imprinted MEG	1		MEG	7.86141	2.54777	20.7243	5.30375e-06	0.000232319	1	1	1	1		MEG	5.13487	3.54525	32.0354	1.51385e-08	6.67005e-07	0.943662	0.869565	0.990291	1		expressed protein
LOC_Os12g18810	Unclassified PEG	1		unknown	n.d.	n.d.	n.d.	n.d.	n.d.	n.d.	n.d.	n.d.	n.d.		PEG	-3.47075	3.65519	28.6828	8.52586e-08	3.72601e-06	0.0588235	0.0843373	0.0786517	0.0967742		expressed protein
LOC_Os12g18860	Unclassified PEG	1		unknown	n.d.	n.d.	n.d.	n.d.	n.d.	n.d.	n.d.	n.d.	n.d.		PEG	-4.86017	5.36768	80.9334	2.33457e-19	3.09471e-17	0.0744186	0.0369004	0.0276008	0.00837521		OsPOP23 - Putative Prolyl Oligopeptidase homologue, expressed
LOC_Os12g19290	Locus-imprinted PEG	1		PEG	-3.5361	5.94676	21.9604	2.78334e-06	0.000126421	0.0209581	0.026694	0.185682	0.245614		PEG	-5.2887	3.20425	27.5431	1.53634e-07	6.4724e-06	0.0377358	0.0882353	0	0		AGC AGC other NDRh TRCd.4 - ACG kinases include homologs to PKA, PKG and PKC, expressed
LOC_Os12g22650	Locus-imprinted MEG	1		MEG	7.7907	2.49556	20.1017	7.34303e-06	0.000308949	1	1	1	1		MEG	5.50756	6.28316	115.372	6.5251e-27	1.33782e-24	0.997147	0.949704	0.985878	0.966741		histone H3, putative, expressed
LOC_Os12g22680	Locus-imprinted MEG	1		MEG	8.49272	8.11184	239.456	5.16787e-54	2.75413e-50	1	0.992284	0.996443	0.99712		MEG	7.51923	8.47878	150.963	1.06775e-34	4.4375e-32	0.989831	0.979328	0.998498	0.998122		histone H3, putative, expressed
LOC_Os12g23040	Locus-imprinted MEG	1		MEG	8.6828	3.26515	36.4948	1.53071e-09	1.2298e-07	1	1	1	1		MEG	6.10754	3.61665	53.6897	2.34795e-13	1.80522e-11	0.985075	0.9801	1	0.979167		transposon%20protein%2C%20putative%2C%20Mutator%20sub-class%2C%20expressed
LOC_Os12g23520	Unclassified MEG	1		unknown	n.d.	n.d.	n.d.	n.d.	n.d.	n.d.	n.d.	n.d.	n.d.		MEG	6.01028	0.572805	10.6521	0.00109946	0.0162562	1	1	1	1		retrotransposon%20protein%2C%20putative%2C%20Ty3-gypsy%20subclass%2C%20expressed
LOC_Os12g27120	Allelic imprinted MEG	1		biallele	5.5443	1.26686	4.71017	0.0299847	0.297577	1	1	NA	NA		MEG	7.02934	1.28155	16.9273	3.88399e-05	0.000918831	1	1	1	1		retrotransposon%20protein%2C%20putative%2C%20unclassified%2C%20expressed
LOC_Os12g27994	Locus-imprinted MEG	1		MEG	3.29552	6.45216	43.3707	4.52913e-11	4.18565e-09	0.84127	0.884861	0.895833	0.963483		MEG	3.03243	7.29819	108.588	1.99819e-25	3.88938e-23	0.9	0.923372	0.830486	0.841079		expressed protein
LOC_Os12g31350	Locus-imprinted PEG	1		PEG	-7.23356	7.5488	145.378	1.77541e-33	1.66972e-30	0.0220049	0.0103481	0.00104058	0.00274876		PEG	-7.09494	7.14841	181.168	2.69342e-41	1.59295e-38	0.0171674	0.0108401	0.00441014	0.000533333		SSXT protein, putative, expressed
LOC_Os12g32050	Allelic imprinted PEG	1		biallele	-7.24136	2.59645	14.5659	0.000135341	0.00438023	NA	NA	0	0		PEG	-6.74025	3.48647	47.4801	5.55645e-12	3.86613e-10	0.035461	0	0	0		expressed protein
LOC_Os12g32060	Locus-imprinted PEG	1		PEG	-4.1803	6.035	56.3904	5.94205e-14	7.7237e-12	0.179104	0.0176125	0.0285714	0.0469799		PEG	-4.66333	6.60248	77.1367	1.59526e-18	2.01068e-16	0.108696	0.0153257	0.0230126	0.0180624		expressed protein
LOC_Os12g32080	Locus-imprinted PEG	1		PEG	-4.71791	4.20415	23.7891	1.07489e-06	5.22351e-05	0	0	0.0944882	0.0680628		PEG	-9.00154	2.98184	53.3567	2.78167e-13	2.21626e-11	0	0	0	0		expressed protein
LOC_Os12g32150	Locus-imprinted PEG	1		PEG	-6.15413	7.38595	63.9389	1.28341e-15	2.05191e-13	0.00341297	0.00272975	0.0225225	0.0554156		PEG	-10.3588	6.70801	322.371	4.40948e-72	2.26015e-68	0.00209205	0.000928505	0	0		expressed protein
LOC_Os12g32170	Locus-imprinted PEG	1		PEG	-6.79156	4.90018	34.0365	5.40892e-09	3.71149e-07	0	0.217391	0	0		PEG	-9.0258	6.02291	236.138	2.73366e-53	4.67061e-50	0.000862813	0	0.00534759	0.00170358		expressed protein
LOC_Os12g32180	Locus-imprinted PEG	1		PEG	-3.47439	4.625	16.0536	6.15744e-05	0.00217799	0.282392	0.0601093	0	0.062069		PEG	-4.21419	4.18484	42.8052	6.04708e-11	3.82658e-09	0.0647059	0.0961538	0.0265487	0.027027		cornichon protein, putative, expressed
LOC_Os12g32250	Allelic imprinted PEG	1		biallele	-3.09892	1.84148	3.02889	0.0817939	0.644833	0.52381	0.103448	0	0		PEG	-4.723	2.01743	16.1987	5.70335e-05	0.00160918	0.0526316	0	0	0.0606061		WRKY96, expressed
LOC_Os12g34022	Allelic imprinted MEG	1		MEG	9.0749	3.63301	43.6424	3.942e-11	3.68565e-09	1	1	1	1		biallele	3.77486	3.4321	11.1592	0.000836177	0.0128708	0.791304	0.689189	1	1		retrotransposon%20protein%2C%20putative%2C%20unclassified%2C%20expressed
LOC_Os12g34490	Allelic imprinted MEG	1		biallele	4.57721	6.13101	4.76412	0.0290589	0.29183	1	0	0.996279	1		MEG	9.81001	3.80774	53.1472	3.09466e-13	2.34416e-11	1	1	1	1		expressed protein
LOC_Os12g36950	Unclassified PEG	1		unknown	n.d.	n.d.	n.d.	n.d.	n.d.	n.d.	n.d.	n.d.	n.d.		PEG	-9.36309	5.20086	154.997	1.4022e-35	5.82747e-33	0.00483092	0	0	0		CTP synthase, putative, expressed
LOC_Os12g37860	Locus-imprinted PEG	1		PEG	-4.46721	5.40446	28.5244	9.25245e-08	5.20874e-06	0.176471	0.136929	0.00262467	0.011236		PEG	-3.62783	7.94578	129.425	5.47553e-30	1.40329e-27	0.13141	0.0806549	0.0519986	0.0426891		expressed protein
LOC_Os12g38580	Locus-imprinted PEG	1		PEG	-3.16992	5.25041	31.716	1.7845e-08	1.11014e-06	0.107317	0.131195	0.137931	0.0220264		PEG	-3.33566	4.47304	37.908	7.41623e-10	4.20809e-08	0.135338	0.0953846	0.0729927	0.0497738		hypothetical protein
LOC_Os12g38590	Locus-imprinted PEG	1		PEG	-4.6123	7.70132	80.7965	2.50198e-19	6.45189e-17	0.0374332	0.0829315	0.012696	0.031182		PEG	-3.68276	7.62246	88.4739	5.15095e-21	7.61598e-19	0.124814	0.123543	0.0288462	0.0430906		pumilio-family RNA binding repeat containing protein, expressed
LOC_Os12g39420	Locus-imprinted PEG	1		PEG	-4.93347	6.6737	79.3754	5.13614e-19	1.22562e-16	0.0753425	0.0217984	0.0231959	0.0113086		PEG	-5.94554	6.33122	75.4147	3.81547e-18	4.73149e-16	0.0546559	0.00184162	0.00638298	0.00923077		nucleobase-ascorbate transporter, putative, expressed
LOC_Os12g39660	Allelic imprinted PEG	1		biallele	-1.39998	5.23603	5.06034	0.0244795	0.306723	0.110345	0.213333	0.434174	0.435028		PEG	-2.65314	5.11856	31.8449	1.66988e-08	8.07476e-07	0.173709	0.0819672	0.0894737	0.171674		calcium-transporting ATPase, plasma membrane-type, putative, expressed
LOC_Os12g39890	Locus-imprinted MEG	1		MEG	6.39255	1.3624	10.0657	0.00151052	0.0328574	1	1	1	1		MEG	6.18854	0.675971	12.6916	0.000367308	0.00638925	1	1	1	1		expressed protein
LOC_Os12g40190	Allelic imprinted PEG	1		biallele	-1.97382	6.39578	20.2454	6.81154e-06	0.000289635	0.359084	0.115523	0.199029	0.128368		PEG	-3.83201	5.17558	44.2783	2.84863e-11	1.84824e-09	0.136187	0.124736	0.0376344	0.014218		G-protein alpha subunit, putative, expressed
LOC_Os12g40510	Locus-imprinted PEG	1		PEG	-6.38517	3.93088	35.2247	2.93777e-09	2.10955e-07	0	0	0	0.0416667		PEG	-5.70674	3.10478	30.4132	3.49142e-08	1.59414e-06	0.04	0.0704225	0	0		calcineurin B, putative, expressed
LOC_Os12g40520	Locus-imprinted PEG	1		PEG	-4.1387	7.41096	113.454	1.71626e-26	8.85146e-24	0.0658915	0.0604805	0.0434043	0.0456274		PEG	-3.20559	7.57812	35.5341	2.50631e-09	1.33355e-07	0.0702275	0.0196831	0.135204	0.223334		MATH domain containing protein, expressed
LOC_Os12g40790	Unclassified MEG	1		MEG	2.96909	7.31341	18.0615	2.13881e-05	0.000810316	0.998426	0.836763	0.842011	0.830439		unknown	n.d.	n.d.	n.d.	n.d.	n.d.	n.d.	n.d.	n.d.	n.d.		zinc finger family protein, putative, expressed
LOC_Os12g41710	Unclassified MEG	1		unknown	n.d.	n.d.	n.d.	n.d.	n.d.	n.d.	n.d.	n.d.	n.d.		MEG	5.01604	1.12248	11.0466	0.000888487	0.0135673	1	1	0.833333	1		Protein kinase domain containing protein, expressed
LOC_Os12g41956	Allelic imprinted PEG	0.225979		biallele	-1.95225	2.7219	2.3853	0.122481	0.818862	0.627907	0.375	0.0625	0		PEG	-4.37873	3.48895	21.2071	4.12238e-06	0.000143741	0.0769231	0.214286	0.0272727	0		galactosyltransferase family protein, putative, expressed
LOC_Os12g42310	Locus-imprinted PEG	1		PEG	-3.14842	5.47784	38.2846	6.1142e-10	4.79185e-08	0.143529	0.0534351	0.0934066	0.0991957		PEG	-4.37263	1.9374	12.7876	0.00034893	0.00811723	0.0909091	0.116279	0	0		serine/threonine-protein phosphatase BSL2, putative, expressed

## Sheet: 5 DAP endosperm
Supplementary Data 2. List of statistical values and maternal rates of imprinted genes in F1 endosperm and embryo.
Gene Name	Type of imprinting	Seed Coat Ratio		NIP-KAS combination											NIP-9311 combination											MSU annotation
				Imprinted	LR test by edgeR					Maternal rate (m / (m + 2p))					Imprinted	LR test by edgeR					Maternal rate (m / (m + 2p))
					logFC	lodCPM	LR	p value	FDR	NIP x KAS rep1	NIP x KAS rep2	KAS x NIP rep1	KAS x NIP rep2			logFC	lodCPM	LR	P value	FDR	NIP x 9311 rep1	NIP x 9311 rep2	9311 x NIP rep1	9311 x NIP rep2
LOC_Os01g02050	Locus-imprinted PEG	1		PEG	-5.20441	4.74207	85.8588	1.9325e-20	4.96698e-18	0.0180879	0.0147992	0.0456853	0.0340136		PEG	-5.94353	5.35628	40.2592	2.22404e-10	1.70812e-08	0.002331	0.0529412	0	0.00851789		phosphoenolpyruvate carboxylase, putative, expressed
LOC_Os01g02870	Unclassified MEG	1		MEG	7.18931	1.46103	15.9585	6.47452e-05	0.0010102	1	1	1	1		unknown	n.d.	n.d.	n.d.	n.d.	n.d.	n.d.	n.d.	n.d.	n.d.		auxin-induced protein 5NG4, putative, expressed
LOC_Os01g03144	Unclassified PEG	1		PEG	-4.23119	5.65834	69.7696	6.6653e-17	1.17714e-14	0.0140351	0.0495868	0.0787589	0.0691824		unknown	n.d.	n.d.	n.d.	n.d.	n.d.	n.d.	n.d.	n.d.	n.d.		white-brown complex homolog protein 7, putative, expressed
LOC_Os01g04600	Allelic imprinted MEG	1		MEG	4.55068	1.09513	8.7209	0.00314582	0.0320584	1	1	1	0.818182		biallele	-0.679533	1.72976	0.617484	0.431984	1	0.315789	0.333333	0.466667	0.263158		expressed protein
LOC_Os01g05510	Allelic imprinted PEG	1		PEG	-5.26692	3.2936	29.5742	5.38176e-08	3.25871e-06	0	0	0.113636	0.0291262		biallele	-1.66514	4.08209	2.46315	0.116545	1	0.047619	0.037594	0.575	0.625468		expressed protein
LOC_Os01g07740	Locus-imprinted PEG	1		PEG	-3.49383	7.20493	73.7977	8.65474e-18	1.71191e-15	0.126984	0.139111	0.0495437	0.0446549		PEG	-2.99002	6.10232	43.6588	3.90914e-11	3.36334e-09	0.191336	0.112399	0.0968661	0.0506224		DEAD-box ATP-dependent RNA helicase 14, putative, expressed
LOC_Os01g07920	Locus-imprinted PEG	0.232241		PEG	-6.49993	3.19411	40.198	2.29488e-10	1.87058e-08	0	0	0.030303	0.0416667		PEG	-4.86068	2.41045	16.2995	5.40773e-05	0.00203074	0	0.0252101	0.2	0		prolyl 4-hydroxylase, putative, expressed
LOC_Os01g07930	Locus-imprinted PEG	1		PEG	-3.06262	7.85439	55.6359	8.72142e-14	1.08725e-11	0.158879	0.189283	0.0627164	0.0620408		PEG	-3.11041	7.86919	58.7006	1.83582e-14	2.24831e-12	0.111906	0.130618	0.0814446	0.0694621		zinc finger C-x8-C-x5-C-x3-H type family protein, expressed
LOC_Os01g08570	Locus-imprinted PEG	1		PEG	-3.5344	5.92896	51.6812	6.52847e-13	7.6865e-11	0.0504587	0.169972	0.0372493	0.0726644		PEG	-3.48948	5.73489	46.9169	7.4063e-12	6.94353e-10	0.0791599	0.111517	0.0268741	0.0848953		2-oxoglutarate and iron-dependent oxygenase domain-containing protein2, putative, expressed
LOC_Os01g10080	Locus-imprinted MEG	1		MEG	8.76577	7.14183	290.696	3.50757e-65	8.67247e-62	1	1	0.997612	0.994775		MEG	8.36408	6.96722	214.043	1.80234e-48	8.16702e-45	0.996702	0.998434	0.993048	0.998506		expressed protein
LOC_Os01g10480	Locus-imprinted MEG	1		MEG	5.85909	3.55642	37.2498	1.03926e-09	3.69721e-08	1	0.984655	0.846154	1		MEG	5.39775	2.76127	14.093	0.000173994	0.00314949	0.992908	1	1	0.8		plastocyanin-like domain containing protein, putative, expressed
LOC_Os01g10520	Locus-imprinted MEG	1		MEG	5.19953	5.37682	51.6207	6.7327e-13	3.84153e-11	0.949119	0.895678	1	1		MEG	5.70936	5.26751	80.6994	2.62797e-19	4.05961e-17	0.98209	0.958084	0.969298	0.996479		expressed protein
LOC_Os01g11130	Locus-imprinted PEG	0.231583		PEG	-4.32022	3.92444	40.8262	1.66391e-10	1.38675e-08	0	0.0534351	0.0931677	0.0351759		PEG	-4.64131	4.75223	37.2995	1.01309e-09	7.40426e-08	0.0117647	0.0448833	0.0294118	0.0337553		RNA recognition motif containing protein, putative, expressed
LOC_Os01g12890	Locus-imprinted MEG	1		MEG	4.70447	5.10189	81.5626	1.69793e-19	2.20954e-17	0.964664	0.979466	0.933993	0.952381		MEG	3.70829	5.07637	38.0341	6.9519e-10	3.84163e-08	0.909605	0.962121	0.866419	0.946903		expressed protein
LOC_Os01g13180	Locus-imprinted MEG	1		MEG	7.9532	6.51239	215.854	7.25601e-49	6.33193e-46	1	0.99686	0.993988	0.993569		MEG	10.8935	4.75551	100.7	1.07033e-23	2.64546e-21	1	1	1	1		expressed protein
LOC_Os01g13360	Locus-imprinted PEG	1		PEG	-3.08832	10.5062	37.9571	7.23171e-10	5.50166e-08	0.154044	0.0988806	0.0888701	0.0802159		PEG	-1.93963	9.18499	10.3729	0.00127882	0.0362928	0.278049	0.189983	0.199344	0.166667		phosphatidylinositol 3- and 4-kinase family protein, putative, expressed
LOC_Os01g13404	Locus-imprinted PEG	1		PEG	-5.29794	4.79779	56.2185	6.48477e-14	8.51342e-12	0	0.0112867	0.0956522	0.023569		PEG	-4.89249	5.0019	46.1122	1.11673e-11	1.01885e-09	0.0221643	0.00746269	0.022082	0.0677966		ATP binding protein, putative, expressed
LOC_Os01g13460	Locus-imprinted PEG	1		PEG	-2.80389	9.8916	36.8442	1.27956e-09	9.39718e-08	0.178295	0.151937	0.0903838	0.0922873		PEG	-4.15607	9.2381	35.1681	3.02436e-09	2.11924e-07	0.102725	0.140264	0.0196527	0.0154487		helix-loop-helix DNA-binding domain containing protein, expressed
LOC_Os01g16810	Locus-imprinted PEG	0.320864		PEG	-4.85466	3.66693	29.0138	7.18649e-08	4.24747e-06	0.025641	0	0.0740741	0.1		PEG	-6.01381	2.75504	30.4877	3.35988e-08	2.00325e-06	0	0	0.024	0.0333333		MYB family transcription factor, putative, expressed
LOC_Os01g17250	Locus-imprinted PEG	0.24407		PEG	-5.60949	4.82175	38.1503	6.55005e-10	5.00876e-08	0	0	0.0813008	0.0738255		PEG	-6.49521	4.59173	77.7492	1.16988e-18	2.01309e-16	0.0128535	0.011236	0	0.0151057		BRASSINOSTEROID INSENSITIVE 1-associated receptor kinase 1 precursor, putative, expressed
LOC_Os01g17990	Locus-imprinted PEG	1		PEG	-5.9913	5.4185	48.6682	3.03147e-12	3.25883e-10	0	0.0058309	0.0658307	0.039604		PEG	-5.15903	5.01764	72.6058	1.58313e-17	2.52722e-15	0.0242588	0.00904977	0.0491803	0.0274914		expressed protein
LOC_Os01g18810	Locus-imprinted MEG	1		MEG	8.9711	3.26323	54.5524	1.51354e-13	9.4342e-12	1	1	1	1		MEG	7.04851	3.70954	52.4926	4.31882e-13	3.8625e-11	1	0.955556	1	1		expressed protein
LOC_Os01g24880	Allelic imprinted MEG	1		MEG	1.97118	7.44424	36.2976	1.69372e-09	5.88437e-08	0.858796	0.807327	0.710829	0.710843		biallele	1.5444	8.96124	13.2526	0.000272199	0.00468982	0.63443	0.764494	0.690915	0.713452		zinc finger, C3HC4 type domain containing protein, expressed
LOC_Os01g27750	Locus-imprinted PEG	1		PEG	-3.47877	4.45649	20.0804	7.42543e-06	0.000317453	0.0829694	0	0.142857	0.138889		PEG	-4.24693	4.20186	49.2123	2.29702e-12	2.26273e-10	0.0447059	0.0562771	0.030303	0.0608696		bifunctional 3-dehydroquinate dehydratase/shikimate dehydrogenase,chloroplast precursor, putative, expressed
LOC_Os01g28300	Locus-imprinted MEG	1		MEG	11.3546	7.2443	342.698	1.64893e-76	2.44619e-72	1	1	0.997552	1		MEG	6.97727	8.00545	36.1463	1.83046e-09	9.46135e-08	0.884817	0.996624	0.999264	0.998603		OsFBX7 - F-box domain containing protein, expressed
LOC_Os01g32980	Unclassified PEG	1		PEG	-7.44916	1.53883	21.3676	3.79125e-06	0.000170952	0	0	0	0		unknown	n.d.	n.d.	n.d.	n.d.	n.d.	n.d.	n.d.	n.d.	n.d.		mitochondrial carrier protein, putative, expressed
LOC_Os01g33370	Unclassified MEG	1		unknown	n.d.	n.d.	n.d.	n.d.	n.d.	n.d.	n.d.	n.d.	n.d.		MEG	3.14789	6.3327	14.0767	0.000175507	0.00316845	0.854019	0.902439	1	0.886179		zinc-binding protein, putative, expressed
LOC_Os01g33650	Locus-imprinted PEG	1		PEG	-3.84412	4.94117	49.6728	1.81645e-12	2.07285e-10	0.045977	0.031348	0.0806452	0.12426		PEG	-4.38753	4.53641	43.2409	4.83974e-11	4.03628e-09	0.0191083	0.0763359	0.09	0.0113379		expressed protein
LOC_Os01g34400	Unclassified MEG	1		unknown	n.d.	n.d.	n.d.	n.d.	n.d.	n.d.	n.d.	n.d.	n.d.		MEG	7.6563	3.39986	54.0135	1.99112e-13	1.86671e-11	1	1	1	0.987952		transposon%20protein%2C%20putative%2C%20Pong%20sub-class%2C%20expressed
LOC_Os01g34410	Unclassified MEG	1		unknown	n.d.	n.d.	n.d.	n.d.	n.d.	n.d.	n.d.	n.d.	n.d.		MEG	11.5524	5.43123	137.671	8.60262e-32	4.67776e-29	1	1	1	1		transposon%20protein%2C%20putative%2C%20Pong%20sub-class%2C%20expressed
LOC_Os01g36840	Locus-imprinted PEG	1		PEG	-3.04995	5.48369	36.4398	1.57456e-09	1.14503e-07	0.0962963	0.0362117	0.18617	0.134615		PEG	-2.51375	5.79104	18.3002	1.88687e-05	0.000758878	0.06639	0.0841924	0.169628	0.291525		ATP-binding region, ATPase-like domain containing protein, expressed
LOC_Os01g38650	Unclassified MEG	1		unknown	n.d.	n.d.	n.d.	n.d.	n.d.	n.d.	n.d.	n.d.	n.d.		MEG	6.53093	5.73503	45.1873	1.79066e-11	1.26125e-09	1	1	1	0.934466		expressed protein
LOC_Os01g40450	Locus-imprinted MEG	1		MEG	10.4413	7.1862	321.019	8.68681e-72	6.44344e-68	1	0.997735	1	1		MEG	9.81245	7.2251	208.147	3.48402e-47	1.18405e-43	1	1	0.994429	1		2-aminoethanethiol dioxygenase, putative, expressed
LOC_Os01g40590	Locus-imprinted PEG	1		PEG	-3.16437	5.98055	66.9388	2.80061e-16	4.77553e-14	0.0700483	0.102183	0.0966292	0.135392		PEG	-3.22026	5.82995	42.7791	6.12832e-11	5.04899e-09	0.111842	0.194729	0.0485437	0.052161		tyrosine protein kinase domain containing protein, putative, expressed
LOC_Os01g41370	Locus-imprinted PEG	1		PEG	-4.74659	8.92905	112.011	3.55303e-26	1.28559e-23	0.0490892	0.0569106	0.0235418	0.0236411		PEG	-4.02671	9.38787	52.1479	5.14739e-13	5.38259e-11	0.0427905	0.111238	0.0380101	0.0325482		FBD domain containing protein, putative, expressed
LOC_Os01g41630	Locus-imprinted PEG	1		PEG	-2.57131	5.19634	35.6023	2.42e-09	1.73433e-07	0.109312	0.0993548	0.190698	0.198198		PEG	-2.23573	6.11282	31.2488	2.26984e-08	1.38992e-06	0.186368	0.125348	0.168884	0.159115		serine/threonine protein phosphatase 2A 55 kDa regulatory subunit B, putative, expressed
LOC_Os01g42090	Unclassified MEG	1		MEG	6.26046	0.816243	11.7178	0.000619059	0.00783596	1	1	1	1		unknown	n.d.	n.d.	n.d.	n.d.	n.d.	n.d.	n.d.	n.d.	n.d.		nodulin MtN3 family protein, putative, expressed
LOC_Os01g42210	Unclassified MEG	1		unknown	n.d.	n.d.	n.d.	n.d.	n.d.	n.d.	n.d.	n.d.	n.d.		MEG	4.25828	1.82593	12.0399	0.000520742	0.00833801	0.956522	0.813953	1	1		LTPL47 - Protease inhibitor/seed storage/LTP family protein precursor, putative, expressed
LOC_Os01g42270	Locus-imprinted MEG	1		MEG	9.1257	5.08224	130.131	3.83527e-30	1.11561e-27	1	1	1	0.98913		MEG	8.65424	5.66043	142.213	8.73601e-33	5.93787e-30	1	0.992481	0.995699	1		transcriptional corepressor LEUNIG, putative, expressed
LOC_Os01g46910	Unclassified MEG	1		unknown	n.d.	n.d.	n.d.	n.d.	n.d.	n.d.	n.d.	n.d.	n.d.		MEG	7.85312	1.89576	21.9928	2.73671e-06	7.73447e-05	1	1	1	1		microneme protein Sm70, putative, expressed
LOC_Os01g48580	Locus-imprinted MEG	1		MEG	8.90285	3.29071	51.3556	7.706e-13	4.38002e-11	1	1	1	1		MEG	8.46338	2.43297	30.8957	2.72276e-08	1.16029e-06	1	1	1	1		ubiquitin-conjugating enzyme E2, putative, expressed
LOC_Os01g49360	Allelic imprinted MEG	1		MEG	2.16065	5.70174	27.6396	1.46154e-07	3.80384e-06	0.765957	0.746479	0.857955	0.819018		biallele	1.55377	3.11771	2.63668	0.104422	0.626162	0.723577	1	0.392157	0.692308		FAD-binding and arabino-lactone oxidase domains containing protein, putative, expressed
LOC_Os01g51754	Locus-imprinted PEG	1		PEG	-1.76117	6.32201	28.1888	1.10041e-07	6.18353e-06	0.226387	0.266355	0.186761	0.23038		PEG	-2.1197	6.17281	26.9577	2.07954e-07	1.12627e-05	0.178003	0.268362	0.119626	0.141713		alpha-amylase precursor, putative, expressed
LOC_Os01g54100	Allelic imprinted PEG	1		biallele	-2.05687	5.13997	18.6079	1.60551e-05	0.000643721	0.350993	0.237288	0.116438	0.123028		PEG	-3.72716	4.72114	27.057	1.97547e-07	1.0785e-05	0.15601	0.116883	0.047619	0.00549451		CK1 CaseinKinase 1a.2 - CK1 includes the casein kinase 1 kinases, expressed
LOC_Os01g54784	Locus-imprinted PEG	1		PEG	-4.11556	4.86976	63.5818	1.53844e-15	2.45406e-13	0.0284238	0.039501	0.0630631	0.107692		PEG	-5.9144	4.62439	70.2841	5.13491e-17	7.76925e-15	0.0124688	0.00744417	0.0327273	0.00460829		expressed protein
LOC_Os01g55450	Unclassified PEG	1		unknown	n.d.	n.d.	n.d.	n.d.	n.d.	n.d.	n.d.	n.d.	n.d.		PEG	-4.3175	4.82712	55.3271	1.02052e-13	1.16579e-11	0.0616438	0.0556701	0.0124481	0.0515464		CAMK KIN1/SNF1/Nim1 like.11 - CAMK includes calcium/calmodulin depedent protein kinases, expressed
LOC_Os01g56100	Locus-imprinted PEG	0.293899		PEG	-5.45955	3.42703	27.8224	1.32975e-07	7.36078e-06	0	0	0.0888889	0.0588235		PEG	-9.3865	3.19327	56.2455	6.39642e-14	7.49594e-12	0	0	0	0		BSD domain containing protein, expressed
LOC_Os01g56110	Locus-imprinted PEG	1		PEG	-4.17413	5.24859	60.4688	7.47546e-15	1.06633e-12	0.0258065	0.0228471	0.0871795	0.109718		PEG	-5.40696	4.8285	54.5305	1.53056e-13	1.69158e-11	0.0325203	0.0583658	0.00653595	0.00791557		RNA recognition motif containing protein, putative, expressed
LOC_Os01g56580	Locus-imprinted PEG	1		PEG	-4.42955	7.70289	114.585	9.70182e-27	3.59816e-24	0.0333162	0.0204208	0.0623363	0.0789177		PEG	-4.3328	7.73542	79.4502	4.94538e-19	9.08479e-17	0.0276447	0.0277338	0.0778816	0.050698		CK1 CaseinKinase 1a.3 - CK1 includes the casein kinase 1 kinases, expressed
LOC_Os01g56710	Unclassified MEG	1		MEG	6.71614	1.12835	13.7271	0.000211383	0.00299796	1	1	1	1		unknown	n.d.	n.d.	n.d.	n.d.	n.d.	n.d.	n.d.	n.d.	n.d.		OsFBDUF6 - F-box and DUF domain containing protein, expressed
LOC_Os01g56820	Allelic imprinted PEG	1		PEG	-2.11279	3.88557	12.9722	0.00031615	0.00985311	0.125828	0.129032	0.25	0.280899		biallele	-3.29544	1.81957	2.86968	0.0902629	1	0	0	0.0769231	0.52		AGAP000951-PA, putative, expressed
LOC_Os01g60360	Unclassified MEG	1		unknown	n.d.	n.d.	n.d.	n.d.	n.d.	n.d.	n.d.	n.d.	n.d.		MEG	6.99523	3.43187	50.6206	1.12064e-12	9.01421e-11	0.977011	1	1	1		ubiquitin-conjugating enzyme, putative, expressed
LOC_Os01g60750	Allelic imprinted MEG	1		MEG	8.16147	3.92152	67.0473	2.65073e-16	2.34069e-14	1	0.992157	1	1		biallele	7.33634	1.56123	14.2249	0.000162206	0.00296375	1	1	NA	1		transposon%20protein%2C%20putative%2C%20unclassified%2C%20expressed
LOC_Os01g61590	Locus-imprinted PEG	1		PEG	-5.62408	5.94111	44.3768	2.70878e-11	2.49595e-09	0.00323625	0.00153139	0.0824891	0.063745		PEG	-7.33019	5.90224	147.369	6.51569e-34	5.21025e-31	0.000969932	0.0125224	0.0071736	0.0045045		CAMK CAMK like.1 - CAMK includes calcium/calmodulin depedent protein kinases, expressed
LOC_Os01g62460	Allelic imprinted PEG	1		biallele	-1.66003	3.92127	8.57363	0.00341067	0.0799325	0.320513	0.309192	0.243902	0.115385		PEG	-2.27395	3.68089	13.29	0.000266819	0.00889004	0.100917	0.251969	0.139785	0.125		ZOS1-16 - C2H2 zinc finger protein, expressed
LOC_Os01g62790	Unclassified PEG	1		PEG	-2.69133	4.16343	21.8835	2.89716e-06	0.000134311	0.08	0.175355	0.0751445	0.169811		unknown	n.d.	n.d.	n.d.	n.d.	n.d.	n.d.	n.d.	n.d.	n.d.		expressed protein
LOC_Os01g63250	Locus-imprinted PEG	1		PEG	-2.66769	5.6063	38.6452	5.0829e-10	3.92734e-08	0.137466	0.0652174	0.177914	0.18894		PEG	-4.54435	4.75647	46.4548	9.37542e-12	8.61145e-10	0.016129	0.0685579	0.0322581	0.0234742		josephin, putative, expressed
LOC_Os01g63710	Allelic imprinted MEG	1		biallele	5.37701	1.71655	9.65798	0.0018853	0.0205802	NA	1	1	0.875		MEG	3.36596	2.32477	12.317	0.000448846	0.0073425	0.869565	0.860465	1	0.916667		CDC6 - Putative DNA replication initiation protein, expressed
LOC_Os01g64810	Locus-imprinted MEG	1		MEG	1.98972	6.56027	35.3905	2.69796e-09	9.09641e-08	0.781513	0.711974	0.833795	0.79224		MEG	1.76492	6.53854	23.8215	1.05697e-06	3.25079e-05	0.725367	0.769063	0.720395	0.736885		zinc finger DHHC domain-containing protein, putative, expressed
LOC_Os01g65770	Allelic imprinted MEG	1		biallele	0.280871	3.75964	0.000354658	0.984975	1	1	1	0	0		MEG	4.19863	2.30089	14.1911	0.000165153	0.0030095	1	0.95	1	0.826087		expressed protein
LOC_Os01g65850	Allelic imprinted PEG	1		biallele	-5.63627	6.75369	8.32612	0.0039079	0.0895222	0.000962464	0	0.350427	0.298969		PEG	-6.1707	6.19084	53.3165	2.83912e-13	3.03897e-11	0.00950475	0.00148148	0.0691244	0		CHD3-type chromatin-remodeling factor PICKLE, putative, expressed
LOC_Os01g65986	Locus-imprinted PEG	1		PEG	-2.34507	5.46122	34.2336	4.88788e-09	3.42037e-07	0.134087	0.213038	0.133333	0.173432		PEG	-1.54168	4.98921	11.1337	0.000847752	0.0250899	0.271318	0.256039	0.281654	0.150685		DUF803 domain containing, putative, expressed
LOC_Os01g66300	Unclassified PEG	1		PEG	-3.2729	2.75679	13.8002	0.000203311	0.00662885	0.0630631	0.1	0.142857	0.102041		unknown	n.d.	n.d.	n.d.	n.d.	n.d.	n.d.	n.d.	n.d.	n.d.		KH domain containing protein, putative, expressed
LOC_Os01g67250	Locus-imprinted PEG	1		PEG	-2.87576	6.23931	46.3479	9.90148e-12	9.92489e-10	0.0503817	0.115722	0.168576	0.154494		PEG	-4.14344	6.19958	30.4332	3.45564e-08	2.05135e-06	0.159524	0.0640777	0.00108814	0.0393996		Rad21 / Rec8 like protein, putative, expressed
LOC_Os01g67870	Locus-imprinted PEG	1		PEG	-1.82657	4.14407	10.3311	0.00130807	0.0348388	0.256506	0.195195	0.0804598	0.297297		PEG	-2.4037	4.04559	16.4813	4.91335e-05	0.0018605	0.137615	0.12963	0.195652	0.107438		expressed protein
LOC_Os01g68820	Locus-imprinted PEG	1		PEG	-5.74723	8.46667	107.955	2.74927e-25	9.06341e-23	0.010302	0.00563435	0.0382036	0.0405771		PEG	-8.56255	7.24424	91.0313	1.4142e-21	3.10075e-19	0.00635401	0	0	0.00147856		expressed protein
LOC_Os01g69850	Allelic imprinted PEG	0.264324		biallele	-2.45938	5.4556	3.44086	0.0636026	0.698922	0.0154799	0.0133333	0.632135	0.633065		PEG	-3.82618	3.02008	15.1416	9.97403e-05	0.0035494	0.0526316	0	0.26087	0.0526316		OsMADS65 - MADS-box family gene with MIKC* type-box, expressed
LOC_Os01g69930	Locus-imprinted PEG	1		PEG	-4.49253	3.54886	20.6084	5.63491e-06	0.00024659	0.208333	0	0	0.0619469		PEG	-5.45272	3.06868	29.035	7.10815e-08	4.06001e-06	0	0.0280374	0.0387597	0		dnaJ domain containing protein, expressed
LOC_Os01g69940	Locus-imprinted PEG	1		PEG	-5.69146	4.09574	43.9013	3.45362e-11	3.10512e-09	0.004329	0	0.0517241	0.0642202		PEG	-9.77801	3.60886	77.6972	1.20111e-18	2.04098e-16	0	0	0	0		OsFBX32 - F-box domain containing protein, expressed
LOC_Os01g73450	Locus-imprinted PEG	1		PEG	-7.72331	1.9814	28.8758	7.7172e-08	4.50727e-06	0	0	0	0		PEG	-8.16312	2.0426	29.4098	5.85792e-08	3.37426e-06	0	0	0	0		amino acid kinase, putative, expressed
LOC_Os02g04230	Unclassified MEG	1		MEG	7.46309	1.85784	21.4778	3.57947e-06	7.28415e-05	1	1	1	1		unknown	n.d.	n.d.	n.d.	n.d.	n.d.	n.d.	n.d.	n.d.	n.d.		CGMC MAPKCMGC 2.7 - CGMC includes CDA, MAPK, GSK3, and CLKC kinases, expressed
LOC_Os02g04450	Unclassified PEG	1		PEG	-3.58762	3.69661	15.7283	7.31236e-05	0.00262661	0.22807	0	0.05	0.0406504		unknown	n.d.	n.d.	n.d.	n.d.	n.d.	n.d.	n.d.	n.d.	n.d.		plant-specific domain TIGR01589 family protein, putative, expressed
LOC_Os02g05050	Unclassified MEG	1		MEG	6.50558	0.958992	10.585	0.00114009	0.0133701	1	1	1	1		unknown	n.d.	n.d.	n.d.	n.d.	n.d.	n.d.	n.d.	n.d.	n.d.		OsSAUR4 - Auxin-responsive SAUR gene family member, expressed
LOC_Os02g05630	Allelic imprinted PEG	1		biallele	-3.67886	4.2713	17.8736	2.36075e-05	0.000919204	0	0.0420712	0.145833	0.306122		PEG	-4.02337	4.50569	42.182	8.31619e-11	6.68937e-09	0.057554	0.0161812	0.0802469	0.0681818		protein phosphatase 2C, putative, expressed
LOC_Os02g06890	Unclassified PEG	1		PEG	-4.76646	5.54342	51.6972	6.47548e-13	7.6851e-11	0.0199203	0.0052356	0.0830946	0.0943396		unknown	n.d.	n.d.	n.d.	n.d.	n.d.	n.d.	n.d.	n.d.	n.d.		OTU-like cysteine protease family protein, putative, expressed
LOC_Os02g07450	Unclassified PEG	1		PEG	-1.74942	4.56383	13.5525	0.00023198	0.00746513	0.131034	0.228487	0.271255	0.266376		unknown	n.d.	n.d.	n.d.	n.d.	n.d.	n.d.	n.d.	n.d.	n.d.		core histone H2A/H2B/H3/H4, putative, expressed
LOC_Os02g07790	Locus-imprinted PEG	1		PEG	-4.77937	5.55116	60.5794	7.0669e-15	1.02782e-12	0.0656064	0.00635324	0.0196078	0.0495627		PEG	-3.89475	5.52311	41.8058	1.00804e-10	8.06078e-09	0.0214724	0.0524823	0.124774	0.0380762		serine/threonine-protein kinase HT1, putative, expressed
LOC_Os02g08300	Locus-imprinted PEG	1		PEG	-4.37366	5.39274	86.6462	1.29779e-20	3.438e-18	0.0441558	0.0701107	0.0428571	0.0268817		PEG	-4.22141	5.72627	63.3234	1.75407e-15	2.33773e-13	0.0618557	0.100324	0.0355987	0.016731		RAD23 DNA repair protein, putative, expressed
LOC_Os02g09580	Locus-imprinted MEG	1		MEG	7.01043	1.87557	16.0812	6.06827e-05	0.000951615	1	1	1	1		MEG	6.92133	1.26717	14.6937	0.000126469	0.00238449	1	1	1	1		OsFBX39 - F-box domain containing protein, expressed
LOC_Os02g09630	Locus-imprinted PEG	0.186051		PEG	-4.12059	4.13272	16.1322	5.90723e-05	0.00214789	0	0.0126582	0.279279	0.166667		PEG	-3.5124	3.28317	14.5943	0.000133318	0.00469516	0.0566038	0.0295082	0.160494	0.132075		GA20292-PA, putative, expressed
LOC_Os02g09650	Locus-imprinted PEG	0.296715		PEG	-4.68276	3.8268	25.2681	4.98894e-07	2.56982e-05	0	0	0.0540541	0.139896		PEG	-8.42095	2.30861	34.2968	4.73161e-09	3.21607e-07	0	0	0	0		AP2 domain containing protein, expressed
LOC_Os02g09770	Allelic imprinted PEG	1		PEG	-6.16577	2.9453	31.4332	2.06423e-08	1.32566e-06	0	0	0.030303	0.0769231		biallele	-7.30242	1.4382	16.0512	6.16524e-05	0.0022899	0	0	NA	0		abhydrolase domain-containing protein FAM108C1, putative, expressed
LOC_Os02g10100	Allelic imprinted PEG	1		biallele	-1.3804	3.17109	3.36269	0.0666889	0.718468	0.107692	0.27619	0.333333	0.319149		PEG	-3.08188	3.81127	11.8018	0.000591731	0.0179154	0.234043	0.253731	0	0.0700637		leucine-rich repeat receptor protein kinase EXS precursor, putative, expressed
LOC_Os02g10600	Unclassified MEG	1		unknown	n.d.	n.d.	n.d.	n.d.	n.d.	n.d.	n.d.	n.d.	n.d.		MEG	2.76439	4.12034	22.0028	2.72258e-06	7.71058e-05	0.944664	0.848341	0.766082	0.808917		OsFBA1 - F-box and FBA domain containing protein, expressed
LOC_Os02g10650	Unclassified PEG	1		unknown	n.d.	n.d.	n.d.	n.d.	n.d.	n.d.	n.d.	n.d.	n.d.		PEG	-6.52624	4.72975	60.8364	6.20201e-15	8.02953e-13	0	0	0.0339806	0.012285		CRAL/TRIO domain containing protein, expressed
LOC_Os02g12840	Allelic imprinted PEG	1		PEG	-3.15745	4.37423	25.0036	5.72239e-07	2.90725e-05	0.142857	0.0202899	0.162055	0.177143		biallele	-1.6461	5.67572	5.94784	0.0147354	0.303504	0.0949721	0.097561	0.444898	0.429017		DEAD-box ATP-dependent RNA helicase, putative, expressed
LOC_Os02g12870	Locus-imprinted PEG	1		PEG	-4.40785	3.56329	35.1089	3.11772e-09	2.22362e-07	0.0408163	0.0258303	0.0120482	0.105882		PEG	-5.27376	4.16275	44.3755	2.71061e-11	2.34701e-09	0.024055	0.0792453	0	0.00869565		expressed protein
LOC_Os02g14720	Locus-imprinted MEG	1		MEG	4.17546	5.78303	34.7103	3.82608e-09	1.25298e-07	0.773852	0.958333	0.990148	0.97		MEG	3.54576	5.72909	50.9561	9.44571e-13	7.73524e-11	0.812646	0.917355	0.905565	0.952318		expressed protein
LOC_Os02g15070	Allelic imprinted MEG	1		MEG	1.68322	11.6278	8.41332	0.00372481	0.0371855	0.712744	0.735956	0.76699	0.756542		biallele	0.761012	12.0738	0.61196	0.434051	1	0.495266	0.374232	0.762724	0.767792		glutelin, putative, expressed
LOC_Os02g15350	Allelic imprinted MEG	1		MEG	1.6473	10.6215	10.9968	0.000912695	0.011008	0.709224	0.737963	0.74914	0.759004		biallele	1.24479	8.61933	6.03259	0.0140441	0.138747	0.788604	0.692475	0.619109	0.600307		dof zinc finger domain containing protein, putative, expressed
LOC_Os02g17190	Unclassified PEG	0.189999		PEG	-7.56375	1.7124	22.426	2.18402e-06	0.000103184	0	0	0	0		unknown	n.d.	n.d.	n.d.	n.d.	n.d.	n.d.	n.d.	n.d.	n.d.		MYB family transcription factor, putative, expressed
LOC_Os02g17910	Locus-imprinted PEG	1		PEG	-4.72593	3.37408	18.0611	2.13931e-05	0.000839595	0	0	0.119266	0.193548		PEG	-8.46267	4.32801	95.4132	1.54521e-22	3.88992e-20	0.00327869	0	0.003003	0		CK1 CaseinKinase 1.4 - CK1 includes the casein kinase 1 kinases, expressed
LOC_Os02g20950	Allelic imprinted MEG	1		biallele	2.74215	3.74824	18.2572	1.9299e-05	0.000339622	0.698113	0.846154	0.891892	0.943662		MEG	3.91413	2.95668	15.575	7.92959e-05	0.00158057	0.917012	1	0.904762	0.925926		expressed protein
LOC_Os02g21430	Locus-imprinted PEG	1		PEG	-5.54908	6.37108	32.6434	1.10714e-08	7.29973e-07	0.000845309	0.00431965	0.0854701	0.131991		PEG	-5.35658	5.42291	43.5597	4.11217e-11	3.51578e-09	0.00108342	0.0314685	0.00512821	0.0646766		AML1, putative, expressed
LOC_Os02g21460	Locus-imprinted PEG	0.0679382		PEG	-3.44108	3.2038	14.4006	0.000147756	0.00497043	0.0857143	0	0.189655	0.0212766		PEG	-4.20576	3.00915	25.2287	5.09201e-07	2.6121e-05	0.0277778	0.0684932	0.0333333	0.0666667		uncharacterized protein yqjG, putative, expressed
LOC_Os02g21870	Unclassified MEG	1		MEG	6.05347	0.659235	8.41805	0.00371514	0.0371139	1	1	1	1		unknown	n.d.	n.d.	n.d.	n.d.	n.d.	n.d.	n.d.	n.d.	n.d.		expressed protein
LOC_Os02g28580	Locus-imprinted MEG	1		MEG	6.48002	5.92475	115.852	5.12051e-27	1.20576e-24	0.971279	0.980861	1	1		MEG	8.0016	6.78994	179.478	6.30113e-41	7.78706e-38	0.987509	0.996245	1	0.997996		expressed protein
LOC_Os02g28660	Locus-imprinted MEG	1		MEG	10.2995	4.15436	80.4619	2.96358e-19	3.69452e-17	1	1	1	1		MEG	10.8305	4.70661	103.308	2.8689e-24	7.49998e-22	1	1	1	1		expressed protein
LOC_Os02g29110	Allelic imprinted PEG	1		biallele	-2.64371	3.76254	10.6851	0.00108	0.0296151	0.111111	0	0.35443	0.208556		PEG	-4.40901	2.85738	18.1007	2.09528e-05	0.000840213	0	0	0.132867	0.0364964		ankyrin repeat family protein, putative, expressed
LOC_Os02g29140	Allelic imprinted PEG	1		biallele	-4.90601	7.35853	10.9429	0.000939651	0.0263511	0.00167504	0.000783085	0.33758	0.287193		PEG	-4.48403	6.54345	29.6214	5.25211e-08	3.06426e-06	0.00970874	0.00917431	0.0943076	0.171516		ankyrin, putative, expressed
LOC_Os02g29150	Allelic imprinted PEG	1		PEG	-2.78659	3.58954	13.9165	0.000191112	0.00627244	0.04	0.0420168	0.296875	0.24812		biallele	-2.02208	4.35372	12.2295	0.000470403	0.0145472	0.0720721	0.178947	0.319149	0.183391		OsFBO11 - F-box and other domain containing protein, expressed
LOC_Os02g29230	Locus-imprinted MEG	1		MEG	8.31873	7.0614	290.716	3.47147e-65	8.67247e-62	0.997319	1	0.994543	0.995512		MEG	12.0317	5.84232	164.063	1.46583e-37	1.42332e-34	1	1	1	1		expressed protein
LOC_Os02g31970	Unclassified MEG	1		unknown	n.d.	n.d.	n.d.	n.d.	n.d.	n.d.	n.d.	n.d.	n.d.		MEG	4.39022	2.79302	13.167	0.000284925	0.00489667	1	1	1	0.729167		retrotransposon%20protein%2C%20putative%2C%20unclassified%2C%20expressed
LOC_Os02g33700	Locus-imprinted MEG	1		MEG	8.43009	2.44437	24.01	9.58357e-07	2.16726e-05	1	1	1	1		MEG	6.09167	1.93074	21.0078	4.57418e-06	0.000122164	1	1	1	0.959184		expressed protein
LOC_Os02g34330	Allelic imprinted MEG	1		MEG	7.1813	1.46432	16.2787	5.46744e-05	0.00086934	1	1	1	1		biallele	2.87896	0.636957	2.11412	0.145946	0.756971	1	1	0	1		retrotransposon%20protein%2C%20putative%2C%20unclassified%2C%20expressed
LOC_Os02g34360	Locus-imprinted PEG	1		PEG	-5.26529	2.70985	27.3053	1.73738e-07	9.54595e-06	0	0	0.0285714	0.0666667		PEG	-6.05567	3.3226	41.0682	1.47009e-10	1.15517e-08	0.0181818	0	0.0181818	0.0232558		expressed protein
LOC_Os02g34370	Locus-imprinted PEG	1		PEG	-5.44687	6.78213	54.4446	1.59895e-13	1.9443e-11	0	0.00790798	0.0685805	0.0707424		PEG	-4.93453	5.30013	66.2465	3.97911e-16	5.5765e-14	0.0526316	0.0472727	0.0123967	0.0181311		expressed protein
LOC_Os02g34850	Allelic imprinted PEG	1		biallele	-1.63031	7.48093	16.2039	5.68778e-05	0.00208857	0.39537	0.357623	0.135579	0.152765		PEG	-1.69187	7.25544	18.85	1.4141e-05	0.000585316	0.27675	0.242221	0.18239	0.179149		histone-lysine N-methyltransferase ASHH2, putative, expressed
LOC_Os02g34990	Locus-imprinted MEG	1		MEG	2.60845	7.47228	52.7744	3.74137e-13	2.23803e-11	0.922345	0.872276	0.758155	0.800245		MEG	2.2036	6.88923	30.4688	3.39281e-08	1.40615e-06	0.776414	0.760479	0.822436	0.797931		ACT domain containing protein, putative, expressed
LOC_Os02g35010	Allelic imprinted PEG	1		biallele	-1.90541	7.77123	16.5388	4.76644e-05	0.00176775	0.102531	0.100378	0.384181	0.379863		PEG	-2.28445	7.8708	22.5507	2.04673e-06	9.76255e-05	0.0987292	0.112105	0.254378	0.191794		STE MEKK ste11 MAP3K.9 - STE kinases include homologs to sterile 7, sterile 11 and sterile 20 from yeast, expressed
LOC_Os02g35144	Allelic imprinted PEG	1		PEG	-4.03029	3.94315	19.2721	1.1335e-05	0.000464515	0.111111	0	0.137056	0.131707		biallele	-2.14149	3.20525	8.94	0.00278993	0.0719665	0.188406	0.236364	0.139535	0.126904		zinc finger, C3HC4 type domain containing protein, expressed
LOC_Os02g36360	Locus-imprinted PEG	0.273407		PEG	-4.40737	6.73089	132.217	1.34103e-30	6.41747e-28	0.0538244	0.035316	0.0304613	0.0576271		PEG	-5.98143	5.67243	108.93	1.68151e-25	5.71463e-23	0.0220588	0.0169492	0.0184957	0.0049505		ZOS2-11 - C2H2 zinc finger protein, expressed
LOC_Os02g36680	Locus-imprinted PEG	1		PEG	-3.21478	11.1099	38.6623	5.03853e-10	3.91343e-08	0.102133	0.0781511	0.104271	0.0995698		PEG	-5.62223	3.89011	40.3096	2.16742e-10	1.67408e-08	0.0990991	0.011236	0	0.00714286		expressed protein
LOC_Os02g39920	Locus-imprinted PEG	1		PEG	-6.82143	3.65791	48.6413	3.07333e-12	3.28007e-10	0	0	0.0408163	0		PEG	-5.89227	7.73287	94.0803	3.02982e-22	7.35489e-20	0.0133583	0.00358995	0.024068	0.0220972		AT hook motif family protein, expressed
LOC_Os02g41610	Locus-imprinted PEG	1		PEG	-3.51914	4.84398	45.4314	1.58083e-11	1.50331e-09	0.0421456	0.084507	0.178082	0.0607735		PEG	-3.23011	8.30535	56.0467	7.07709e-14	8.15305e-12	0.0536131	0.0909499	0.10664	0.108458		expressed protein
LOC_Os02g41630	Unclassified PEG	1		unknown	n.d.	n.d.	n.d.	n.d.	n.d.	n.d.	n.d.	n.d.	n.d.		PEG	-2.93397	6.38579	38.3416	5.93834e-10	4.38727e-08	0.154217	0.148661	0.0448384	0.0931011		phenylalanine ammonia-lyase, putative, expressed
LOC_Os02g42220	Allelic imprinted MEG	1		MEG	4.24508	3.71205	14.6772	0.000127582	0.00187208	1	0.871383	1	1		biallele	3.43002	2.54993	6.633	0.0100107	0.105076	0.849462	1	NA	0.714286		transposon%20protein%2C%20putative%2C%20unclassified%2C%20expressed
LOC_Os02g43460	Locus-imprinted MEG	1		MEG	3.25085	4.67134	22.0721	2.626e-06	5.47146e-05	0.969349	0.706004	0.959732	0.940476		MEG	3.88118	4.6327	17.593	2.73592e-05	0.000609706	0.868085	1	1	0.85		required to maintain repression 1, putative, expressed
LOC_Os02g45344	Allelic imprinted PEG	1		PEG	-1.90557	4.39502	14.2567	0.000159491	0.00535304	0.212766	0.107143	0.296552	0.226667		biallele	-2.20905	3.30979	8.06727	0.0045072	0.109608	0.0645161	0.52381	0.340909	0.0899471		O-acyltransferase, putative, expressed
LOC_Os02g47950	Unclassified PEG	1		unknown	n.d.	n.d.	n.d.	n.d.	n.d.	n.d.	n.d.	n.d.	n.d.		PEG	-2.61539	5.52675	28.4733	9.49989e-08	5.2284e-06	0.116105	0.0941884	0.188703	0.13217		expressed protein
LOC_Os02g50850	Allelic imprinted PEG	1		biallele	-1.30462	6.34218	15.8205	6.96443e-05	0.0025138	0.245902	0.245927	0.376312	0.28869		PEG	-1.85667	6.39842	23.1158	1.52532e-06	7.37909e-05	0.214582	0.159004	0.172414	0.256983		BAH domain containing protein, putative, expressed
LOC_Os02g50860	Allelic imprinted PEG	1		biallele	-3.61044	3.56918	11.3597	0.000750531	0.0217463	0	0.0204082	0.255814	0.317647		PEG	-2.60627	5.20092	25.8224	3.74325e-07	1.9647e-05	0.0713043	0.180617	0.179104	0.139823		ras-related protein, putative, expressed
LOC_Os02g51540	Locus-imprinted PEG	1		PEG	-6.34348	5.31609	37.1717	1.08172e-09	7.98376e-08	0	0	0.0202703	0.078534		PEG	-6.72351	5.38773	120.255	5.5643e-28	2.10114e-25	0.00504202	0.0159453	0.00961538	0.0037037		eukaryotic aspartyl protease domain containing protein, expressed
LOC_Os02g51550	Locus-imprinted PEG	1		PEG	-2.95213	5.68768	46.5698	8.84123e-12	8.98354e-10	0.0574374	0.107011	0.172805	0.133803		PEG	-3.32923	5.77297	29.3129	6.15839e-08	3.53237e-06	0.0993214	0.242105	0.0677966	0.0465116		DUF581 domain containing protein, expressed
LOC_Os02g51780	Allelic imprinted PEG	1		biallele	-1.34831	6.01485	11.1622	0.000834814	0.0237706	0.168317	0.219344	0.370421	0.408748		PEG	-1.63324	5.08165	12.2277	0.000470851	0.0145472	0.261682	0.246835	0.240557	0.15528		ribonuclease protein, putative, expressed
LOC_Os02g51850	Locus-imprinted PEG	1		PEG	-3.0085	4.5812	29.3293	6.1065e-08	3.66761e-06	0.0424242	0.12809	0.160377	0.0857143		PEG	-2.56112	4.29484	16.5647	4.70177e-05	0.00178536	0.161826	0.234375	0.0714286	0.0779221		OsAPRL3 adenosine 5'-phosphosulfate reductase-like OsAPRL3, expressed
LOC_Os02g51860	Locus-imprinted PEG	0.113473		PEG	-6.0613	4.52693	28.9947	7.25781e-08	4.2726e-06	0	0	0.0465116	0.113402		PEG	-5.86403	4.57852	60.8177	6.26127e-15	8.02978e-13	0.0268949	0.0410959	0	0.00549451		dehydration response related protein, putative, expressed
LOC_Os02g52920	Allelic imprinted PEG	1		biallele	-1.3551	5.13197	10.827	0.00100029	0.0277532	0.338983	0.21095	0.358974	0.238095		PEG	-3.00234	4.68028	22.5315	2.06725e-06	9.82596e-05	0.157685	0.146552	0.0125	0.101322		emp24/gp25L/p24 family protein, putative, expressed
LOC_Os02g52960	Locus-imprinted PEG	1		PEG	-2.92714	8.63217	53.9017	2.10778e-13	2.54218e-11	0.0667468	0.0858903	0.181598	0.158537		PEG	-3.54005	8.32578	56.1204	6.81665e-14	7.92013e-12	0.0380806	0.0677582	0.0970745	0.0932897		PHD-finger domain containing protein, putative, expressed
LOC_Os02g53740	Allelic imprinted PEG	1		biallele	-2.19413	7.04969	17.1528	3.44896e-05	0.00130858	0.0504732	0.0947368	0.36358	0.359593		PEG	-2.59748	6.86826	33.7525	6.2588e-09	4.17069e-07	0.0755034	0.0858525	0.173934	0.235815		XI-I, putative, expressed
LOC_Os02g56530	Locus-imprinted PEG	1		PEG	-3.79265	3.56724	20.5092	5.93449e-06	0.000258177	0.0694444	0	0.16129	0.045045		PEG	-5.03772	2.84321	17.6367	2.67373e-05	0.00104145	0	0.00854701	0	0.0866142		ankyrin repeat domain containing protein, expressed
LOC_Os02g57080	Allelic imprinted PEG	1		biallele	-3.08134	4.78022	8.21635	0.00415145	0.0938473	0.0020202	0.0529595	0.424084	0.389222		PEG	-5.68548	3.5771	24.5619	7.19594e-07	3.62302e-05	0.0837004	0	0	0		serine/threonine-protein kinase, putative, expressed
LOC_Os02g57190	Locus-imprinted PEG	1		PEG	-4.25071	4.75057	57.7142	3.03102e-14	4.05091e-12	0.0947368	0.0135135	0.0682731	0.04		PEG	-4.84455	5.08859	50.8712	9.86304e-13	1.00058e-10	0.0183639	0.0138889	0.0191083	0.0862471		Myosin head domain containing protein, expressed
LOC_Os02g57200	Allelic imprinted PEG	1		PEG	-4.92457	6.37628	55.3977	9.84531e-14	1.21713e-11	0.0192308	0.00291971	0.0747126	0.0821256		biallele	-1.74237	6.77569	4.33914	0.0372458	0.62125	0.0434783	0.0655586	0.553312	0.547461		expressed protein
LOC_Os02g57820	Unclassified PEG	1		unknown	n.d.	n.d.	n.d.	n.d.	n.d.	n.d.	n.d.	n.d.	n.d.		PEG	-4.67625	2.19308	16.9081	3.92348e-05	0.00150242	0.0344828	0	0	0.0952381		AT hook motif domain containing protein, expressed
LOC_Os03g04545	Allelic imprinted PEG	0.148755		PEG	-1.80066	4.51419	14.5462	0.000136763	0.0046534	0.282609	0.242938	0.185185	0.185484		biallele	-0.057549	3.66738	0.00728849	0.931965	1	0.52381	0.606557	0.286344	0.471429		expressed protein
LOC_Os03g05180	Unclassified PEG	1		unknown	n.d.	n.d.	n.d.	n.d.	n.d.	n.d.	n.d.	n.d.	n.d.		PEG	-6.88496	1.02739	14.5502	0.000136476	0.00479395	0	0	0	0		expressed protein
LOC_Os03g05480	Allelic imprinted PEG	1		PEG	-1.88879	5.11528	21.574	3.40439e-06	0.000155397	0.216749	0.210421	0.216	0.201299		biallele	-1.61928	4.42791	9.41475	0.00215246	0.0568167	0.281853	0.302491	0.281106	0.101449		ZOS3-01 - C2H2 zinc finger protein, expressed
LOC_Os03g07130	Locus-imprinted PEG	1		PEG	-2.04473	4.86645	21.3137	3.89929e-06	0.000174761	0.139423	0.158672	0.262295	0.241379		PEG	-2.8803	4.04133	16.1711	5.7869e-05	0.00216118	0.216438	0.169231	0.0375	0.0634146		RING finger protein 13, putative, expressed
LOC_Os03g09150	Allelic imprinted PEG	1		PEG	-3.33671	3.69803	13.8035	0.000202954	0.00662885	0.00341297	0.0855263	0.294118	0.1875		biallele	1.19304	0.550406	0.469569	0.493186	1	0	0.692308	1	0.777778		pumilio-family RNA binding repeat domain containing protein, expressed
LOC_Os03g14280	Allelic imprinted PEG	1		PEG	-2.04039	4.20807	13.6961	0.000214905	0.00697618	0.0775862	0.196347	0.283237	0.298507		biallele	-3.08422	2.77609	5.38135	0.0203531	0.389691	0.0243902	0.0181818	0.142857	0.308411		ATP-dependent Clp protease ATP-binding subunit, putative, expressed
LOC_Os03g15010	Allelic imprinted PEG	1		biallele	-2.33282	4.61621	11.1087	0.000859222	0.0243255	0.0119048	0.11413	0.295082	0.347826		PEG	-2.52328	5.10944	24.6427	6.90052e-07	3.50021e-05	0.21875	0.0709382	0.104478	0.165644		transposon%20protein%2C%20putative%2C%20unclassified%2C%20expressed
LOC_Os03g15990	Allelic imprinted MEG	1		MEG	9.15012	3.10284	47.8287	4.65141e-12	2.36314e-10	1	1	1	1		biallele	8.37972	2.46915	21.5916	3.37329e-06	9.26394e-05	1	1	NA	1		EDM2, putative, expressed
LOC_Os03g16760	Locus-imprinted MEG	1		MEG	3.70042	4.40446	33.7126	6.38858e-09	2.06481e-07	0.914286	0.968397	0.916667	0.853659		MEG	5.28757	3.31334	35.1553	3.04426e-09	1.53843e-07	0.943662	0.972222	1	1		protein phosphatase 2C, putative, expressed
LOC_Os03g16940	Allelic imprinted MEG	1		MEG	2.27753	2.54237	8.62104	0.00332303	0.0336499	0.755102	0.826087	0.851852	0.823529		biallele	0.554343	2.36925	0.184631	0.667423	1	1	0.398773	1	0.285714		glyoxalase family protein, putative, expressed
LOC_Os03g18080	Locus-imprinted PEG	1		PEG	-2.92632	6.18985	22.964	1.65066e-06	7.92475e-05	0.0617284	0.0230608	0.293493	0.247126		PEG	-3.2415	6.45311	34.9252	3.42609e-09	2.36418e-07	0.0326209	0.0463576	0.177502	0.176235		SacI homology domain containing protein, expressed
LOC_Os03g19920	Locus-imprinted PEG	1		PEG	-5.76413	4.44208	23.1183	1.52338e-06	7.38539e-05	0	0	0.09375	0.138462		PEG	-6.50986	5.22876	83.9617	5.04463e-20	9.93864e-18	0.0198675	0.00847458	0	0.0106762		expressed protein
LOC_Os03g20430	Locus-imprinted MEG	1		MEG	8.49898	2.66601	36.1429	1.83362e-09	6.326e-08	1	1	1	1		MEG	7.37737	1.48597	19.8851	8.2237e-06	0.000207024	1	1	1	1		histone-lysine N-methyltransferase, H3 lysine-9 specific SUVH8, putative, expressed
LOC_Os03g21870	Unclassified MEG	1		unknown	n.d.	n.d.	n.d.	n.d.	n.d.	n.d.	n.d.	n.d.	n.d.		MEG	4.55979	2.83884	14.7063	0.000125623	0.00237513	1	0.765957	1	1		DUF623 domain containing protein, expressed
LOC_Os03g22810	Unclassified MEG	1		MEG	5.73203	0.470674	9.03422	0.00264973	0.0277996	1	1	1	1		unknown	n.d.	n.d.	n.d.	n.d.	n.d.	n.d.	n.d.	n.d.	n.d.		copper/zinc superoxide dismutase, putative, expressed
LOC_Os03g24900	Locus-imprinted PEG	1		PEG	-4.50646	4.42664	41.1687	1.39638e-10	1.18373e-08	0.0357143	0.00266667	0.075	0.0909091		PEG	-7.40316	4.06479	83.321	6.97531e-20	1.33553e-17	0.00361011	0.00425532	0.010989	0		DHHC zinc finger domain containing protein, expressed
LOC_Os03g25070	Locus-imprinted PEG	1		PEG	-6.83731	3.68188	62.8077	2.27905e-15	3.41513e-13	0	0	0.0175439	0.012987		PEG	-7.84492	6.12932	121.743	2.62735e-28	1.05048e-25	0.00214133	0.00098912	0	0.0134831		CAMK CAMK like.18 - CAMK includes calcium/calmodulin depedent protein kinases, expressed
LOC_Os03g26280	Allelic imprinted MEG	1		MEG	6.72712	1.48051	15.133	0.000100194	0.0015014	1	1	1	1		biallele	2.69093	0.774662	1.56191	0.211385	0.899205	1	1	0	1		expressed protein
LOC_Os03g27450	Locus-imprinted PEG	1		PEG	-5.45527	5.25308	56.1929	6.56985e-14	8.54945e-12	0.00485437	0.00371747	0.0747126	0.0522876		PEG	-7.91808	6.08841	163.135	2.3377e-37	2.44452e-34	0.00902935	0	0.00355872	0.00205339		ADP-ribosylation factor, putative, expressed
LOC_Os03g27460	Locus-imprinted PEG	1		PEG	-3.41354	6.30178	33.2412	8.14053e-09	5.53966e-07	0.0343474	0.0255738	0.198594	0.226994		PEG	-4.87828	5.9826	69.6107	7.22444e-17	1.06749e-14	0.0361446	0.00478469	0.058642	0.037037		heat shock protein DnaJ, putative, expressed
LOC_Os03g29470	Locus-imprinted PEG	1		PEG	-3.16541	7.69554	77.7593	1.16391e-18	2.53921e-16	0.122109	0.0698482	0.108726	0.0907258		PEG	-2.22664	5.3021	22.2059	2.44915e-06	0.000114411	0.152497	0.126316	0.251429	0.128079		transcription initiation factor IID, putative, expressed
LOC_Os03g29740	Unclassified MEG	1		MEG	5.17021	1.50433	12.2427	0.000467086	0.00607294	1	0.894737	1	1		unknown	n.d.	n.d.	n.d.	n.d.	n.d.	n.d.	n.d.	n.d.	n.d.		LSM domain containing protein, expressed
LOC_Os03g31070	Allelic imprinted PEG	1		biallele	-3.21892	1.40611	2.43427	0.118709	0.943859	1	0.192308	0	0		PEG	-4.99705	1.61233	12.71	0.000363699	0.011498	0.102041	0	0	0		protein kinase, putative, expressed
LOC_Os03g31210	Allelic imprinted MEG	1		MEG	4.61215	3.20474	29.4985	5.59609e-08	1.57829e-06	0.976744	1	0.90625	0.922078		biallele	5.67173	2.74735	14.163	0.000167639	0.00305072	0.977528	1	NA	1		UDP-glucose 6-dehydrogenase, putative, expressed
LOC_Os03g31944	Allelic imprinted MEG	1		biallele	9.94301	3.7525	41.5034	1.17665e-10	4.67979e-09	1	1	NA	NA		MEG	10.3018	4.15708	85.1458	2.77162e-20	4.83043e-18	1	1	1	1		expressed protein
LOC_Os03g36790	Locus-imprinted PEG	1		PEG	-3.24848	4.23779	16.0072	6.3103e-05	0.00228883	0.12381	0	0.12782	0.171875		PEG	-6.06122	3.94315	58.9845	1.58917e-14	1.96392e-12	0.00952381	0.0104167	0	0.0246305		tobamovirus multiplication protein, putative, expressed
LOC_Os03g38970	Locus-imprinted PEG	0.162456		PEG	-4.58229	5.47472	55.2294	1.07254e-13	1.31497e-11	0.0220713	0.00906344	0.0787879	0.0914454		PEG	-5.13612	6.66223	134.031	5.37966e-31	2.92524e-28	0.0362976	0.0304487	0.0186246	0.019084		metal ion binding protein, putative, expressed
LOC_Os03g42050	Allelic imprinted PEG	1		PEG	-2.3334	5.36134	29.2476	6.36953e-08	3.81016e-06	0.17037	0.241885	0.12	0.127962		biallele	-1.69379	4.95722	12.3554	0.000439706	0.0137096	0.25	0.333333	0.198381	0.134328		exportin-7-A, putative, expressed
LOC_Os03g43590	Allelic imprinted PEG	0.0720894		biallele	-2.83967	6.21214	9.02832	0.00265829	0.0646132	0.0030581	0.0536585	0.439153	0.371742		PEG	-2.77897	6.06142	19.8295	8.46655e-06	0.000364376	0.0255639	0.0715096	0.285557	0.186094		LSTK-1-like kinase, putative, expressed
LOC_Os03g43890	Unclassified PEG	1		PEG	-4.77881	3.7746	31.9181	1.60813e-08	1.04634e-06	0	0.123967	0.0638298	0.00719424		unknown	n.d.	n.d.	n.d.	n.d.	n.d.	n.d.	n.d.	n.d.	n.d.		WD domain, G-beta repeat domain containing protein, expressed
LOC_Os03g47686	Locus-imprinted PEG	1		PEG	-5.23649	4.34884	12.0049	0.000530607	0.0159021	0	0	0.227273	0.245283		PEG	-8.49492	2.41631	33.3318	7.77023e-09	5.02993e-07	0	0	0	0		ankyrin, putative, expressed
LOC_Os03g50330	Unclassified PEG	1		PEG	-4.24116	5.70045	74.9686	4.78251e-18	9.85397e-16	0.0121457	0.0801034	0.0533708	0.0477876		unknown	n.d.	n.d.	n.d.	n.d.	n.d.	n.d.	n.d.	n.d.	n.d.		CAMK KIN1/SNF1/Nim1 like.18 - CAMK includes calcium/calmodulin depedent protein kinases, expressed
LOC_Os03g50440	Unclassified PEG	1		PEG	-1.99292	3.41476	10.6609	0.00109427	0.0299511	0.140625	0.279279	0.222222	0.184211		unknown	n.d.	n.d.	n.d.	n.d.	n.d.	n.d.	n.d.	n.d.	n.d.		ubiquitin-conjugating enzyme, putative, expressed
LOC_Os03g51220	Locus-imprinted MEG	1		MEG	2.2433	5.39685	29.3934	5.90773e-08	1.65987e-06	0.806344	0.824885	0.740933	0.860697		MEG	2.55485	6.22495	35.3914	2.69672e-09	1.36788e-07	0.856808	0.836735	0.885551	0.74813		SWI/SNF-related matrix-associated actin-dependent regulator of chromatin subfamily C member, putative, expressed
LOC_Os03g51610	Allelic imprinted PEG	1		biallele	-2.78421	5.61468	12.7274	0.000360328	0.0110902	0.387097	0.266055	0.0168856	0.0556701		PEG	-3.08625	7.26112	39.6615	3.02015e-10	2.25582e-08	0.154723	0.158952	0.0398148	0.0755864		Inositol 1, 3, 4-trisphosphate 5/6-kinase, putative, expressed
LOC_Os03g52594	Locus-imprinted PEG	1		PEG	-5.01322	5.72995	64.6535	8.92987e-16	1.47194e-13	0	0.0354957	0.0309278	0.0530612		PEG	-4.19246	5.29095	47.108	6.71796e-12	6.35061e-10	0.081862	0.0384615	0.0305206	0.0325733		CCR4-NOT transcription factor, putative, expressed
LOC_Os03g53630	Unclassified PEG	1		PEG	-3.99484	5.94526	37.3058	1.00986e-09	7.49061e-08	0.0172216	0.0209205	0.211429	0.103226		unknown	n.d.	n.d.	n.d.	n.d.	n.d.	n.d.	n.d.	n.d.	n.d.		PHD finger family protein, putative, expressed
LOC_Os03g53770	Unclassified PEG	1		PEG	-2.49346	4.71574	22.6381	1.95567e-06	9.29882e-05	0.0462963	0.134328	0.276596	0.194139		unknown	n.d.	n.d.	n.d.	n.d.	n.d.	n.d.	n.d.	n.d.	n.d.		RNA recognition motif containing protein, putative, expressed
LOC_Os03g54900	Locus-imprinted PEG	1		PEG	-4.37526	5.35871	83.5273	6.28435e-20	1.50368e-17	0.0295858	0.0493963	0.0723404	0.0334572		PEG	-4.21161	2.10261	13.5884	0.000227592	0.00769623	0.125	0	0	0.0746269		phytosulfokine receptor precursor, putative, expressed
LOC_Os03g54910	Unclassified PEG	1		PEG	-2.25895	7.6256	45.1584	1.8172e-11	1.71708e-09	0.123937	0.125463	0.241449	0.220145		unknown	n.d.	n.d.	n.d.	n.d.	n.d.	n.d.	n.d.	n.d.	n.d.		X8 domain containing protein, expressed
LOC_Os03g56250	Allelic imprinted PEG	1		biallele	-2.43763	6.00788	22.3377	2.28674e-06	0.000107695	0.112549	0.0466249	0.305164	0.267532		PEG	-2.60055	5.90046	22.5141	2.08608e-06	9.88092e-05	0.0675381	0.0660147	0.246316	0.229418		LRR receptor-like protein kinase, putative, expressed
LOC_Os03g56310	Locus-imprinted PEG	1		PEG	-3.12137	3.71746	16.2256	5.62289e-05	0.00206986	0	0.144444	0.102362	0.204082		PEG	-3.66618	4.44788	28.9542	7.41096e-08	4.19769e-06	0.13369	0.00671141	0.0660377	0.0478873		5-nucleotidase domain-containing protein, putative, expressed
LOC_Os03g58060	Locus-imprinted PEG	1		PEG	-1.69642	6.26125	21.9409	2.8117e-06	0.000130757	0.146699	0.245333	0.248201	0.295139		PEG	-1.5454	5.90657	14.6424	0.000129957	0.00458865	0.296159	0.235532	0.190244	0.225187		XRN 5'-3' exonuclease N-terminus domain containing protein, expressed
LOC_Os03g58130	Locus-imprinted PEG	1		PEG	-2.26844	7.14134	56.1366	6.7606e-14	8.72117e-12	0.184603	0.163371	0.167505	0.166134		PEG	-4.79821	5.61977	11.877	0.000568319	0.0173223	0.233704	0.276284	0.00197239	0		thioredoxin, putative, expressed
LOC_Os03g58530	Allelic imprinted MEG	1		biallele	2.40222	1.49146	1.89955	0.168128	0.6353	1	0.047619	1	1		MEG	1.60313	7.97294	17.051	3.63885e-05	0.000779	0.724315	0.700322	0.714932	0.733249		ES43 protein, putative, expressed
LOC_Os03g59740	Unclassified PEG	1		PEG	-4.77292	8.78902	40.6022	1.86601e-10	1.52941e-08	0.0054605	0.0125471	0.121194	0.115344		unknown	n.d.	n.d.	n.d.	n.d.	n.d.	n.d.	n.d.	n.d.	n.d.		ADP-ribosylation factor, putative, expressed
LOC_Os03g60120	Unclassified PEG	1		unknown	n.d.	n.d.	n.d.	n.d.	n.d.	n.d.	n.d.	n.d.	n.d.		PEG	-2.34283	4.57448	20.7396	5.26159e-06	0.000234512	0.133127	0.179063	0.104478	0.188406		AP2 domain containing protein, expressed
LOC_Os03g60130	Allelic imprinted PEG	1		biallele	-1.26605	7.83548	13.0841	0.000297808	0.00938	0.216435	0.195937	0.404614	0.387844		PEG	-1.92652	7.23436	28.6799	8.53858e-08	4.77668e-06	0.232649	0.174257	0.186571	0.184502		transcription elongation factor protein, putative, expressed
LOC_Os03g60140	Allelic imprinted PEG	1		biallele	-2.40944	1.56034	1.9223	0.165603	1	0	0	0.846154	0.290323		PEG	-7.44335	1.40874	20.1525	7.15074e-06	0.000310566	0	0	0	0		U-box domain-containing protein, putative, expressed
LOC_Os03g60150	Allelic imprinted PEG	0.25563		biallele	-2.76588	3.89711	12.5527	0.000395625	0.0120763	0	0.119266	0.168539	0.300971		PEG	-3.98464	2.65094	13.1591	0.000286125	0.0094637	0.0804598	0	0	0.0892857		protein kinase domain containing protein, expressed
LOC_Os03g60710	Locus-imprinted PEG	1		PEG	-3.33908	8.26042	66.7784	3.03809e-16	5.12159e-14	0.0487312	0.0567065	0.14574	0.149112		PEG	-3.24375	7.00762	66.5447	3.42049e-16	4.84355e-14	0.0888444	0.136126	0.0709824	0.0633042		protein kinase domain containing protein, expressed
LOC_Os03g61120	Allelic imprinted PEG	1		biallele	-0.943293	7.32913	10.7871	0.00102212	0.0282369	0.341077	0.301028	0.352525	0.364306		PEG	-2.06219	7.25844	18.6446	1.57497e-05	0.000641021	0.223544	0.233491	0.0753169	0.18389		anthranilate synthase component I-1, chloroplast precursor, putative, expressed
LOC_Os03g62660	Unclassified PEG	1		PEG	-1.68932	4.76725	12.9483	0.000320215	0.0099589	0.280992	0.291607	0.178744	0.194444		unknown	n.d.	n.d.	n.d.	n.d.	n.d.	n.d.	n.d.	n.d.	n.d.		transposon%20protein%2C%20putative%2C%20unclassified%2C%20expressed
LOC_Os03g63040	Locus-imprinted PEG	1		PEG	-2.74191	4.69453	19.5921	9.58634e-06	0.000401733	0.203065	0.0214286	0.12931	0.128405		PEG	-3.0737	5.50158	40.1902	2.30406e-10	1.74979e-08	0.104895	0.0666667	0.136069	0.104396		expressed protein
LOC_Os03g63770	Allelic imprinted PEG	0.244441		biallele	-3.72309	1.90161	8.0921	0.00444587	0.0988823	0	0	0.15	0.257143		PEG	-2.70316	8.39838	30.5227	3.29986e-08	1.97613e-06	0.102299	0.135887	0.129398	0.11052		RCD1, putative, expressed
LOC_Os04g01650	Unclassified MEG	1		MEG	4.07748	1.65378	10.2314	0.0013807	0.0158657	1	1	0.909091	0.846154		unknown	n.d.	n.d.	n.d.	n.d.	n.d.	n.d.	n.d.	n.d.	n.d.		erythronate-4-phosphate dehydrogenase domain containing protein, expressed
LOC_Os04g05030	Allelic imprinted PEG	1		biallele	-3.96042	4.03523	10.4319	0.00123856	0.0332261	0	0	0.312883	0.295337		PEG	-3.98396	4.26823	17.8208	2.42719e-05	0.000959164	0.010453	0.00507614	0.217822	0.175325		serine-rich 25 kDa antigen protein, putative, expressed
LOC_Os04g06770	Allelic imprinted PEG	1		PEG	-1.975	4.92147	20.9948	4.60528e-06	0.000203938	0.20202	0.169036	0.168675	0.257426		biallele	-1.27992	5.66886	6.39717	0.0114302	0.246248	0.170532	0.182957	0.471098	0.320106		argonaute, putative, expressed
LOC_Os04g08034	Locus-imprinted MEG	1		MEG	3.17008	5.18027	22.5631	2.03351e-06	4.34685e-05	0.893082	0.786697	1	0.885167		MEG	2.55826	5.93216	36.5158	1.51435e-09	7.94219e-08	0.853535	0.811739	0.793774	0.862715		ZOS4-02 - C2H2 zinc finger protein, expressed
LOC_Os04g08470	Locus-imprinted PEG	1		PEG	-6.63268	4.71897	69.9252	6.15963e-17	1.10094e-14	0	0	0.0281124	0.0306748		PEG	-8.55469	3.706	75.2648	4.11633e-18	6.74185e-16	0.00507614	0	0	0		OsFBX116 - F-box domain containing protein, expressed
LOC_Os04g08570	Locus-imprinted MEG	1		MEG	8.08439	5.98367	168.083	1.94054e-38	8.99623e-36	1	0.990438	1	1		MEG	8.38331	5.44768	127.021	1.83827e-29	7.34982e-27	0.996748	1	0.993031	0.992754		uncharacterized PE-PGRS family protein PE PGRS20, putative, expressed
LOC_Os04g10260	Locus-imprinted MEG	1		MEG	9.77426	6.54723	247.362	9.76142e-56	1.44811e-52	1	1	0.99359	1		MEG	8.22891	6.53085	139.653	3.17017e-32	1.87371e-29	0.998525	0.982924	1	1		basic region leucine zipper domain containing protein, expressed
LOC_Os04g11730	Allelic imprinted MEG	1		MEG	6.31904	0.847858	10.4197	0.00124675	0.0144609	1	1	1	1		biallele	5.4534	0.229468	5.30676	0.0212429	0.194331	1	NA	NA	1		methyl-CpG binding domain containing protein, expressed
LOC_Os04g11830	Locus-imprinted PEG	1		PEG	-4.06087	1.71945	9.87454	0.00167581	0.043236	0.0714286	0.150685	0	0		PEG	-3.72212	3.06226	12.4129	0.000426383	0.0133554	0.205128	0.04	0	0.0289855		TCP family transcription factor, putative, expressed
LOC_Os04g13210	Allelic imprinted MEG	1		MEG	2.50536	3.17039	9.94455	0.00161327	0.0180625	1	0.711712	0.797468	0.772727		biallele	1.03476	1.27464	0.521818	0.470067	1	1	0.72	0	0.548387		multidrug resistance-associated protein, putative, expressed
LOC_Os04g17700	Allelic imprinted PEG	1		PEG	-2.051	4.03064	13.9111	0.000191662	0.00627661	0.210884	0.214437	0.195876	0.142857		biallele	-3.0337	3.0261	2.70752	0.0998764	1	0.38806	0.954545	0	0.011236		kinesin heavy chain isolog, putative, expressed
LOC_Os04g20774	Allelic imprinted PEG	1		PEG	-1.73844	7.63157	28.473	9.50165e-08	5.44236e-06	0.263412	0.24029	0.177861	0.231876		biallele	-1.99859	7.21354	14.4269	0.000145709	0.00506592	0.237525	0.305586	0.14157	0.0942452		pumilio-family RNA binding repeat containing protein, expressed
LOC_Os04g22240	Locus-imprinted PEG	1		PEG	-6.39201	6.05701	161.691	4.83361e-37	3.4146e-34	0.0151844	0.00451671	0.0181818	0.0118044		PEG	-8.81808	6.02588	134.933	3.41472e-31	1.93415e-28	0.00715015	0	0	0		zinc finger, C3HC4 type domain containing protein, expressed
LOC_Os04g28120	Unclassified MEG	1		unknown	n.d.	n.d.	n.d.	n.d.	n.d.	n.d.	n.d.	n.d.	n.d.		MEG	4.43367	6.30396	29.8655	4.63089e-08	1.8848e-06	0.974199	0.983827	0.817204	0.9678		response regulator receiver domain containing protein, expressed
LOC_Os04g31170	Locus-imprinted PEG	1		PEG	-4.70296	8.46897	150.688	1.22649e-34	6.99805e-32	0.0245217	0.0362037	0.0462825	0.0430917		PEG	-6.09519	9.39532	43.2526	4.81107e-11	4.03628e-09	0.069062	0.0522136	0.00263678	0.00254165		expressed protein
LOC_Os04g32880	Locus-imprinted PEG	1		PEG	-3.70951	6.25351	88.0356	6.42873e-21	1.76611e-18	0.0875233	0.087959	0.0466045	0.0638889		PEG	-4.99445	6.21517	50.3937	1.25798e-12	1.2632e-10	0.00318471	0.0180033	0.0732624	0.0353179		CBS domain containing membrane protein, putative, expressed
LOC_Os04g32970	Locus-imprinted PEG	1		PEG	-4.37795	2.56332	16.4177	5.08077e-05	0.00187496	0	0.0181818	0.163636	0.0697674		PEG	-4.834	2.74755	24.7522	6.51942e-07	3.31929e-05	0.0322581	0	0.0857143	0.0232558		OTU-like cysteine protease family protein, putative, expressed
LOC_Os04g35000	Unclassified MEG	1		MEG	2.99063	7.11716	45.134	1.84004e-11	8.39907e-10	0.77931	0.758242	0.945803	0.936401		unknown	n.d.	n.d.	n.d.	n.d.	n.d.	n.d.	n.d.	n.d.	n.d.		expressed protein
LOC_Os04g36620	Allelic imprinted PEG	1		biallele	-1.82678	6.05058	16.8157	4.11909e-05	0.0015431	0.110759	0.145959	0.35823	0.332075		PEG	-2.4017	5.47429	28.9784	7.31907e-08	4.16299e-06	0.112392	0.13438	0.183752	0.164461		hydrolase, alpha/beta fold family domain containing protein, expressed
LOC_Os04g38525	Locus-imprinted MEG	1		MEG	11.1375	5.32916	141.754	1.10045e-32	3.62783e-30	1	1	1	1		MEG	8.64848	4.38373	94.6729	2.24589e-22	4.77041e-20	0.990783	1	1	1		expressed protein
LOC_Os04g38950	Allelic imprinted PEG	1		biallele	-1.29668	5.72438	6.3659	0.0116334	0.21957	0.122558	0.180556	0.521739	0.446281		PEG	-2.01628	3.98854	11.3424	0.000757582	0.0225846	0.150442	0.176471	0.181818	0.25		class I glutamine amidotransferase, putative, expressed
LOC_Os04g39240	Locus-imprinted PEG	0.259555		PEG	-1.97136	5.17429	23.7917	1.07343e-06	5.3081e-05	0.259424	0.189756	0.18408	0.178744		PEG	-1.75446	4.70175	12.2766	0.000458679	0.0142358	0.221996	0.173448	0.230126	0.225806		expressed protein
LOC_Os04g39560	Locus-imprinted MEG	1		MEG	3.81003	8.38596	46.4982	9.17027e-12	4.46036e-10	0.865267	0.790834	0.975746	0.9667		MEG	3.84447	8.03074	24.6234	6.97006e-07	2.22943e-05	0.782559	0.747052	0.988752	0.970573		expressed protein
LOC_Os04g40660	Locus-imprinted PEG	1		PEG	-3.12731	8.81662	21.4922	3.55262e-06	0.000161666	0.0262058	0.0358337	0.281564	0.283506		PEG	-3.32776	8.29281	31.6752	1.82238e-08	1.12606e-06	0.0397112	0.0312204	0.21393	0.153339		MA3 domain containing protein, expressed
LOC_Os04g41470	Locus-imprinted PEG	1		PEG	-3.69378	7.7674	76.6908	1.99932e-18	4.29853e-16	0.0554707	0.0320035	0.10837	0.108502		PEG	-3.33454	8.37944	32.8454	9.97877e-09	6.42898e-07	0.0322878	0.0856614	0.105047	0.0882699		expressed protein
LOC_Os04g42250	Locus-imprinted PEG	1		PEG	-5.23428	7.87473	78.4591	8.1673e-19	1.80839e-16	0.0131387	0.00563698	0.0657729	0.0573414		PEG	-6.8994	7.16749	114.533	9.96176e-27	3.56369e-24	0.00338983	0.00445765	0.0153846	0.00922778		transferase family protein, putative, expressed
LOC_Os04g42260	Allelic imprinted PEG	1		PEG	-8.40147	2.4052	28.624	8.78844e-08	5.09283e-06	0	0	0	0		biallele	-5.52663	3.81185	21.6504	3.27144e-06	0.000150752	0.0205479	0.00552486	NA	NA		protein phosphatase 2C, putative, expressed
LOC_Os04g42600	Unclassified PEG	1		PEG	-4.15111	3.52131	31.7543	1.74963e-08	1.12851e-06	0.0985915	0.0886076	0.037594	0.0149254		unknown	n.d.	n.d.	n.d.	n.d.	n.d.	n.d.	n.d.	n.d.	n.d.		polyadenylate-binding protein, putative, expressed
LOC_Os04g42634	Unclassified PEG	1		PEG	-3.27258	5.45043	30.4101	3.49697e-08	2.16156e-06	0.00436681	0.130208	0.122807	0.11501		unknown	n.d.	n.d.	n.d.	n.d.	n.d.	n.d.	n.d.	n.d.	n.d.		expressed protein
LOC_Os04g43130	Unclassified PEG	1		PEG	-3.86537	5.95132	70.6573	4.24998e-17	7.78376e-15	0.028754	0.0643172	0.0985915	0.0631068		unknown	n.d.	n.d.	n.d.	n.d.	n.d.	n.d.	n.d.	n.d.	n.d.		transcriptional corepressor LEUNIG, putative, expressed
LOC_Os04g44710	Unclassified PEG	1		PEG	-4.96668	4.47385	27.8975	1.27915e-07	7.13392e-06	0.0212766	0	0.207921	0.0186335		unknown	n.d.	n.d.	n.d.	n.d.	n.d.	n.d.	n.d.	n.d.	n.d.		double-stranded RNA binding motif containing protein, expressed
LOC_Os04g46020	Allelic imprinted PEG	1		PEG	-2.21382	3.22938	10.8413	0.000992624	0.0276277	0.0882353	0.29927	0.15	0.139785		biallele	-2.05173	2.48467	5.4146	0.0199691	0.385371	0.322034	0.227273	0.268293	0.0534351		GATA zinc finger domain containing protein, expressed
LOC_Os04g46300	Allelic imprinted MEG	1		MEG	6.58578	1.02187	11.8607	0.000573322	0.00728188	1	1	1	1		biallele	1.33387	0.630579	0.843252	0.358468	1	0.517241	0.565217	NA	1		disease resistance protein RPM1, putative, expressed
LOC_Os04g51380	Unclassified PEG	1		PEG	-3.15396	3.38721	16.8279	4.09264e-05	0.00153707	0.12381	0.0106383	0.111111	0.194805		unknown	n.d.	n.d.	n.d.	n.d.	n.d.	n.d.	n.d.	n.d.	n.d.		protein-S-isoprenylcysteine O-methyltransferase. tax, putative, expressed
LOC_Os04g53450	Allelic imprinted PEG	1		PEG	-1.69119	5.96893	21.7058	3.17834e-06	0.000145527	0.173653	0.239325	0.26096	0.28169		biallele	-1.39098	5.70556	8.89709	0.00285625	0.0733987	0.233751	0.152142	0.423341	0.265823		expressed protein
LOC_Os04g56720	Unclassified PEG	1		unknown	n.d.	n.d.	n.d.	n.d.	n.d.	n.d.	n.d.	n.d.	n.d.		PEG	-3.98817	3.93815	35.0285	3.24915e-09	2.25351e-07	0.0642202	0.0642202	0.048951	0.04		RCC2, putative, expressed
LOC_Os04g57190	Unclassified MEG	1		unknown	n.d.	n.d.	n.d.	n.d.	n.d.	n.d.	n.d.	n.d.	n.d.		MEG	6.73666	0.971039	14.0097	0.000181872	0.0032641	1	1	1	1		ubiquitin carboxyl-terminal hydrolase, family 1, putative, expressed
LOC_Os04g57640	Unclassified PEG	1		unknown	n.d.	n.d.	n.d.	n.d.	n.d.	n.d.	n.d.	n.d.	n.d.		PEG	-3.63277	7.30999	76.3123	2.42174e-18	4.06434e-16	0.0717762	0.043222	0.0668524	0.0986949		RCD1, putative, expressed
LOC_Os04g58750	Allelic imprinted PEG	1		PEG	-3.56164	3.62816	18.9504	1.34161e-05	0.000546779	0.0956522	0.198068	0	0.0731707		biallele	-2.6262	2.85787	7.82417	0.00515521	0.123163	0.37931	0.125926	0.115385	0		protein kinase family protein, putative, expressed
LOC_Os05g01020	Allelic imprinted PEG	1		biallele	-2.03709	7.56215	28.5784	8.99791e-08	5.17995e-06	0.12023	0.117671	0.311203	0.290186		PEG	-1.77681	7.47114	22.4283	2.18134e-06	0.000102962	0.192331	0.156721	0.238774	0.258847		transcriptional repressor, putative, expressed
LOC_Os05g01210	Locus-imprinted PEG	1		PEG	-5.54336	5.98794	125.312	4.34839e-29	1.7919e-26	0	0.04	0.0189944	0.0228833		PEG	-5.67087	5.10863	35.4956	2.55622e-09	1.81933e-07	0.0896552	0.0227273	0	0.00689655		expressed protein
LOC_Os05g01230	Allelic imprinted PEG	1		PEG	-2.04522	8.15784	35.8889	2.08898e-09	1.50437e-07	0.134328	0.159229	0.263098	0.241379		biallele	-2.03972	7.83453	19.7216	8.9585e-06	0.000381761	0.354331	0.248048	0.106475	0.105986		zinc finger, C3HC4 type domain containing protein, expressed
LOC_Os05g01240	Locus-imprinted PEG	0.12431		PEG	-2.48916	5.86152	43.5902	4.04861e-11	3.59647e-09	0.138983	0.113464	0.166425	0.191558		PEG	-4.13096	4.20539	25.2979	4.91231e-07	2.53817e-05	0.227273	0.0663391	0	0.0272109		AML1, putative, expressed
LOC_Os05g01710	Allelic imprinted PEG	1		PEG	-2.29158	5.6751	33.577	6.84985e-09	4.70451e-07	0.18038	0.166403	0.159624	0.162791		biallele	-1.87141	4.99661	12.4633	0.000415025	0.0130297	0.326087	0.125714	0.142857	0.170507		transcription initiation factor IIA gamma chain, putative, expressed
LOC_Os05g02260	Locus-imprinted PEG	0.23478		PEG	-1.60789	6.69222	25.9133	3.57107e-07	1.89203e-05	0.280297	0.241784	0.24967	0.206478		PEG	-1.47684	5.96318	12.1182	0.000499328	0.015392	0.246626	0.24826	0.18315	0.280876		expressed protein
LOC_Os05g03630	Locus-imprinted PEG	1		PEG	-5.70348	3.64022	55.8803	7.70213e-14	9.68315e-12	0.00952381	0.00833333	0.032967	0.0280374		PEG	-8.54296	2.3957	37.4793	9.23882e-10	6.78879e-08	0	0	0	0		dnaJ domain containing protein, expressed
LOC_Os05g04330	Locus-imprinted PEG	1		PEG	-6.36352	4.90211	84.138	4.61425e-20	1.16021e-17	0	0.00795756	0.0338164	0.0220264		PEG	-5.90569	4.52335	51.135	8.62269e-13	8.88006e-11	0.06	0.021148	0.00363636	0		DNA methyltransferase protein, putative, expressed
LOC_Os05g04520	Allelic imprinted PEG	1		biallele	-1.78616	5.68786	19.3004	1.11682e-05	0.000459983	0.291005	0.301587	0.180723	0.145455		PEG	-2.48281	5.95705	25.2913	4.92922e-07	2.53817e-05	0.226174	0.232737	0.076412	0.0829016		protein kinase, putative, expressed
LOC_Os05g04540	Allelic imprinted PEG	1		biallele	-1.69781	2.96774	6.0676	0.0137684	0.251855	0.190083	0.230769	0.254902	0.278689		PEG	-2.08191	3.89551	13.7204	0.00021214	0.00720957	0.169643	0.217391	0.125	0.226891		expressed protein
LOC_Os05g05660	Locus-imprinted MEG	1		MEG	2.49314	7.03348	70.0706	5.72203e-17	5.40678e-15	0.808867	0.856678	0.851388	0.822454		MEG	2.70733	6.41968	40.5762	1.89094e-10	1.14756e-08	0.833785	0.752926	0.906639	0.857274		PWWP domain containing protein, expressed
LOC_Os05g05780	Locus-imprinted PEG	1		PEG	-2.76032	5.98103	44.3792	2.70543e-11	2.49595e-09	0.0807249	0.0921386	0.213531	0.1569		PEG	-3.82	6.0539	72.3362	1.81484e-17	2.80352e-15	0.0790899	0.0574713	0.0355427	0.0750308		chromatin-remodeling complex ATPase chain, putative, expressed
LOC_Os05g05790	Allelic imprinted PEG	1		biallele	-0.86127	0.719312	0.265218	0.606557	1	NA	0.5	0.0769231	0.4		PEG	-6.5817	1.76043	22.0883	2.60387e-06	0.000121223	0	0.0126582	0	0		double-stranded RNA binding motif containing protein, expressed
LOC_Os05g05800	Unclassified PEG	0.217653		PEG	-3.63977	2.53903	12.3672	0.000436948	0.0132831	0	0.030303	0.179487	0.2		unknown	n.d.	n.d.	n.d.	n.d.	n.d.	n.d.	n.d.	n.d.	n.d.		OsFBL21 - F-box domain and LRR containing protein, expressed
LOC_Os05g07720	Unclassified PEG	1		PEG	-4.68784	8.43834	85.8492	1.94193e-20	4.96698e-18	0.0603487	0.0743915	0.026024	0.0129432		unknown	n.d.	n.d.	n.d.	n.d.	n.d.	n.d.	n.d.	n.d.	n.d.		alliin lyase precursor, putative, expressed
LOC_Os05g08730	Allelic imprinted PEG	1		biallele	-1.30668	3.35554	3.47655	0.0622443	0.688677	0.202073	0.133333	0.358491	0.555556		PEG	-2.62757	4.04096	20.8676	4.92149e-06	0.000220801	0.166667	0.128631	0.188811	0.0572687		early fruit transcript, putative, expressed
LOC_Os05g08840	Locus-imprinted PEG	1		PEG	-4.26095	8.03602	129.478	5.33029e-30	2.39621e-27	0.0261845	0.053357	0.0548604	0.0687602		PEG	-3.48345	8.30883	52.693	3.89978e-13	4.10958e-11	0.108094	0.0368814	0.0745516	0.0734767		DnaK family protein, putative, expressed
LOC_Os05g09708	Allelic imprinted MEG	1		MEG	6.89873	1.24712	12.2002	0.00047785	0.00620259	1	1	1	1		biallele	5.77223	0.477234	7.54256	0.00602583	0.0690103	1	1	NA	1		expressed protein
LOC_Os05g10800	Locus-imprinted MEG	1		MEG	9.12633	6.57458	247.037	1.14954e-55	1.55031e-52	0.996894	0.997576	0.998086	1		MEG	8.91467	5.37984	110.739	6.74937e-26	2.08525e-23	1	1	0.993333	1		expressed protein
LOC_Os05g11140	Locus-imprinted PEG	1		PEG	-5.71289	5.50723	63.5344	1.5759e-15	2.48706e-13	0.0122324	0	0.0354223	0.0432099		PEG	-8.7733	5.91687	171.532	3.42344e-39	4.23075e-36	0.00363636	0.000893655	0.00135685	0.0026178		CK1 CaseinKinase 1a.5 - CK1 includes the casein kinase 1 kinases, expressed
LOC_Os05g12170	Allelic imprinted PEG	0.0767767		PEG	-2.74829	3.52926	10.7055	0.00106819	0.0293457	0.0627063	0.0379747	0.266667	0.294118		biallele	-3.96215	1.79576	2.8552	0.0910788	1	0	0	NA	0.333333		plant-specific domain TIGR01589 family protein, putative, expressed
LOC_Os05g12490	Allelic imprinted MEG	1		biallele	0.119085	3.7745	0.033074	0.855691	1	0.181818	0.449612	0.560976	0.782609		MEG	4.1454	1.46069	10.3042	0.00132726	0.0187361	0.954545	1	1	0.809524		transporter-related, putative, expressed
LOC_Os05g12670	Locus-imprinted PEG	1		PEG	-3.12883	6.20995	33.8142	6.06333e-09	4.1837e-07	0	0	0.157895	0.205941		PEG	-4.01886	2.6993	13.4204	0.000248905	0.00839607	0	0	0.145833	0.0140845		expressed protein
LOC_Os05g13940	Allelic imprinted MEG	1		MEG	3.36837	1.8735	9.27134	0.00232767	0.0248962	0.916667	0.904762	1	0.842105		biallele	1.29462	1.08477	0.53513	0.464458	1	0.0588235	0.428571	1	0.928571		retrotransposon%20protein%2C%20putative%2C%20unclassified%2C%20expressed
LOC_Os05g23420	Unclassified PEG	1		PEG	-3.17369	3.57642	25.2235	5.10563e-07	2.62083e-05	0.0493827	0.102041	0.121212	0.139785		unknown	n.d.	n.d.	n.d.	n.d.	n.d.	n.d.	n.d.	n.d.	n.d.		sugar porter, putative, expressed
LOC_Os05g23910	Locus-imprinted MEG	1		MEG	3.91358	8.48469	18.3199	1.86742e-05	0.000330192	0.984085	0.991566	0.72827	0.704087		MEG	4.16997	6.7973	16.3504	5.26461e-05	0.00109096	1	0.978622	0.710042	0.74584		histone-like transcription factor and archaeal histone, putative, expressed
LOC_Os05g23950	Locus-imprinted MEG	1		MEG	7.46222	1.67701	17.9635	2.25187e-05	0.000389807	1	1	1	1		MEG	7.8471	1.90185	23.4385	1.28973e-06	3.89613e-05	1	1	1	1		TRAF-type zinc finger family protein, expressed
LOC_Os05g24000	Unclassified PEG	1		unknown	n.d.	n.d.	n.d.	n.d.	n.d.	n.d.	n.d.	n.d.	n.d.		PEG	-5.08189	4.36557	46.0544	1.15014e-11	1.04234e-09	0.00970874	0.00621118	0.0745098	0.0422535		expressed protein
LOC_Os05g26040	Locus-imprinted MEG	1		MEG	5.61203	7.31702	91.8769	9.22411e-22	1.39632e-19	0.993581	0.991572	0.951378	0.931649		MEG	6.8455	8.0857	150.697	1.22081e-34	8.73458e-32	0.977301	0.991489	0.99428	0.993066		pumilio-family RNA binding repeat containing protein, expressed
LOC_Os05g26110	Locus-imprinted MEG	1		MEG	8.06021	6.34515	175.285	5.18698e-40	2.95957e-37	1	0.989002	1	1		MEG	10.7489	6.53406	202.036	7.50755e-46	1.70096e-42	1	0.997199	1	1		transposon%20protein%2C%20putative%2C%20Mutator%20sub-class%2C%20expressed
LOC_Os05g26690	Allelic imprinted MEG	1		MEG	2.87594	7.1289	54.465	1.58244e-13	9.82241e-12	1	0.823529	0.854528	0.882941		biallele	2.32145	6.29798	0.340863	0.559332	1	1	0.0285714	0.995956	0.993894		PROLM15 - Prolamin precursor, putative, expressed
LOC_Os05g26720	Allelic imprinted MEG	1		biallele	3.99044	5.60395	25.8088	3.76968e-07	9.15274e-06	0.623529	0.877193	0.983444	0.987322		MEG	5.17894	7.06329	36.0389	1.93413e-09	9.95931e-08	1	0.950617	0.981319	0.975734		PROLM16 - Prolamin precursor, expressed
LOC_Os05g26750	Locus-imprinted MEG	1		MEG	6.71115	4.21131	66.9849	2.73594e-16	2.38751e-14	1	1	1	0.970149		MEG	3.49677	6.96844	16.3751	5.19642e-05	0.00108013	0.973034	0.741775	0.961134	0.960801		PROLM17 - Prolamin precursor, expressed
LOC_Os05g26770	Locus-imprinted MEG	1		MEG	5.82703	3.33735	37.5711	8.81398e-10	3.16599e-08	1	1	0.914894	0.963636		MEG	5.0737	4.978	24.4046	7.80833e-07	2.46279e-05	0.974026	0.927909	0.98773	0.99115		PROLM18 - Prolamin precursor, expressed
LOC_Os05g28180	Locus-imprinted PEG	1		PEG	-4.35371	4.40905	28.1416	1.12755e-07	6.31217e-06	0	0.0181818	0.0958904	0.133333		PEG	-6.4198	3.97896	54.7442	1.37284e-13	1.54235e-11	0.0403587	0.00840336	0	0		AMP deaminase, putative, expressed
LOC_Os05g28200	Allelic imprinted PEG	0.223476		biallele	0.213421	1.05784	0.0246608	0.875215	1	0.84	0.416667	1	0.333333		PEG	-1.84168	3.79731	9.96232	0.00159777	0.0441464	0.197368	0.251908	0.203008	0.175676		prenyltransferase, putative, expressed
LOC_Os05g28440	Allelic imprinted PEG	1		biallele	-4.68499	4.07588	9.73188	0.00181099	0.0464008	0	0	0.25641	0.313725		PEG	-8.97467	4.22498	93.4743	4.11513e-22	9.81424e-20	0	0	0.00869565	0		expressed protein
LOC_Os05g28860	Unclassified PEG	1		PEG	-4.75515	2.58779	17.568	2.77221e-05	0.00106543	0	0	0.037037	0.104478		unknown	n.d.	n.d.	n.d.	n.d.	n.d.	n.d.	n.d.	n.d.	n.d.		3'-5' exonuclease, putative, expressed
LOC_Os05g28870	Unclassified PEG	1		PEG	-3.5515	3.50489	24.4696	7.54903e-07	3.80918e-05	0.0857143	0.0754717	0.0852713	0.0612245		unknown	n.d.	n.d.	n.d.	n.d.	n.d.	n.d.	n.d.	n.d.	n.d.		mitochondrial carrier protein, putative, expressed
LOC_Os05g30150	Locus-imprinted MEG	1		MEG	5.40811	4.31043	46.0042	1.17999e-11	5.61063e-10	1	1	0.917051	0.972414		MEG	7.25929	3.01109	34.6444	3.95769e-09	1.96353e-07	1	1	1	0.980769		amino acid transporter family protein, putative, expressed
LOC_Os05g31380	Locus-imprinted PEG	1		PEG	-5.81634	4.21283	22.9117	1.69614e-06	8.09076e-05	0	0	0.0491803	0.176471		PEG	-6.05747	4.48113	78.2363	9.14211e-19	1.614e-16	0.0116009	0.00854701	0.0234375	0.0078125		GRAS family transcription factor containing protein, expressed
LOC_Os05g32570	Allelic imprinted PEG	1		biallele	-2.31768	6.49101	13.0298	0.000306574	0.00959499	0.386967	0.395624	0.0653266	0.0436364		PEG	-4.33375	5.526	12.8608	0.000335536	0.0107832	0.296482	0.223975	0	0.0103448		RING E3 ligase protein, putative, expressed
LOC_Os05g34310	Locus-imprinted MEG	1		MEG	8.5785	8.92365	73.344	1.08914e-17	1.12989e-15	0.999601	0.982395	1	0.998918		MEG	8.48084	8.94791	104.051	1.97185e-24	5.58444e-22	0.999119	0.994488	0.998252	0.997004		no apical meristem protein, putative, expressed
LOC_Os05g34510	Allelic imprinted PEG	1		biallele	-1.77759	12.5736	9.56729	0.00198075	0.0500587	0.198556	0.185503	0.260419	0.26036		PEG	-2.07702	12.2391	11.0701	0.000877313	0.025703	0.142151	0.162386	0.207201	0.19984		expressed protein
LOC_Os05g34670	Allelic imprinted MEG	1		MEG	2.2613	5.99737	33.1835	8.38572e-09	2.65817e-07	0.743682	0.779449	0.856354	0.876543		biallele	1.38042	5.93668	10.5513	0.00116109	0.0166146	0.632207	0.758037	0.539267	0.785203		KH domain containing protein, putative, expressed
LOC_Os05g36090	Unclassified MEG	1		MEG	5.3751	1.71663	14.8422	0.000116888	0.0017323	1	1	0.894737	1		unknown	n.d.	n.d.	n.d.	n.d.	n.d.	n.d.	n.d.	n.d.	n.d.		zinc finger DHHC domain-containing protein, putative, expressed
LOC_Os05g36380	Unclassified MEG	1		unknown	n.d.	n.d.	n.d.	n.d.	n.d.	n.d.	n.d.	n.d.	n.d.		MEG	5.84074	0.37245	8.94384	0.00278407	0.0359417	1	1	1	1		expressed protein
LOC_Os05g38600	Allelic imprinted MEG	1		MEG	3.87909	5.58128	50.9576	9.43835e-13	5.34149e-11	1	1	0.919762	0.882353		biallele	3.63427	2.91859	2.83868	0.0920195	0.578323	1	0.469388	1	1		ZOS5-09 - C2H2 zinc finger protein, expressed
LOC_Os05g38640	Allelic imprinted PEG	0.0667519		biallele	-1.38642	5.54097	13.2855	0.000267463	0.00849639	0.251462	0.281553	0.326531	0.248577		PEG	-2.45889	3.83799	19.0307	1.28632e-05	0.000538037	0.163399	0.138211	0.130435	0.132231		Core histone H2A/H2B/H3/H4 domain containing protein, putative, expressed
LOC_Os05g40790	Locus-imprinted MEG	1		MEG	6.29455	7.80651	188.441	6.96036e-43	4.48944e-40	0.972603	0.995249	0.984877	0.987063		MEG	7.12617	9.1281	131.784	1.66822e-30	8.0992e-28	0.995513	0.99106	0.993452	0.983892		CCR4-NOT transcription factor, putative, expressed
LOC_Os05g41200	Unclassified PEG	0.15788		PEG	-4.76427	1.37239	10.6291	0.00111323	0.0303023	0	0	0.0697674	0		unknown	n.d.	n.d.	n.d.	n.d.	n.d.	n.d.	n.d.	n.d.	n.d.		OsCML9 - Calmodulin-related calcium sensor protein, expressed
LOC_Os05g41210	Unclassified PEG	1		PEG	-5.48567	3.90994	37.9428	7.28495e-10	5.51389e-08	0.00436681	0	0.056	0.0707071		unknown	n.d.	n.d.	n.d.	n.d.	n.d.	n.d.	n.d.	n.d.	n.d.		OsCam2 - Calmodulin, expressed
LOC_Os05g41220	Locus-imprinted PEG	0.174584		PEG	-4.57703	5.27865	28.4621	9.55523e-08	5.45199e-06	0	0.0231839	0.152542	0.113924		PEG	-4.51092	4.23053	33.6543	6.58298e-09	4.34413e-07	0	0.0515464	0.0306748	0.0536585		SNF1-related protein kinase regulatory subunit beta-1, putative, expressed
LOC_Os05g41790	Unclassified PEG	1		PEG	-4.56477	4.09006	30.8236	2.82579e-08	1.79148e-06	0	0.01875	0.121495	0.109244		unknown	n.d.	n.d.	n.d.	n.d.	n.d.	n.d.	n.d.	n.d.	n.d.		zinc finger C-x8-C-x5-C-x3-H type family protein, expressed
LOC_Os05g43480	Locus-imprinted PEG	1		PEG	-5.3608	5.67979	115.397	6.44161e-27	2.45029e-24	0.0125392	0.0147783	0.0381679	0.0387597		PEG	-5.34927	5.00959	69.7073	6.8792e-17	1.02765e-14	0.046332	0.0304114	0.00440529	0.0124069		ubiquitin carboxyl-terminal hydrolase domain containing protein, expressed
LOC_Os05g43560	Allelic imprinted PEG	1		biallele	-1.92682	2.81613	4.05043	0.04416	0.566708	1	0.25641	0.154639	0.0909091		PEG	-2.05512	3.86069	11.6871	0.000629361	0.0189701	0.173333	0.112245	0.264368	0.188235		AGAP007115-PA, putative, expressed
LOC_Os05g43570	Locus-imprinted PEG	1		PEG	-2.15913	4.23883	17.9019	2.32591e-05	0.000910418	0.280488	0.195804	0.142857	0.129032		PEG	-3.1574	4.3429	15.7997	7.04125e-05	0.00255933	0.149123	0.0483871	0	0.161972		AGC AGC other NDRh TRCd.2 - ACG kinases include homologs to PKA, PKG and PKC, expressed
LOC_Os05g45930	Locus-imprinted PEG	1		PEG	-2.43259	7.40881	29.9783	4.3692e-08	2.67839e-06	0.281453	0.260209	0.0920465	0.0711297		PEG	-2.76334	8.13202	40.2415	2.24425e-10	1.71395e-08	0.244785	0.100574	0.093217	0.0817856		IQ calmodulin-binding motif family protein, putative, expressed
LOC_Os05g46490	Allelic imprinted PEG	1		biallele	-1.03483	6.83031	7.73206	0.00542488	0.116804	0.531532	0.352445	0.227586	0.237632		PEG	-1.83656	6.52664	24.6085	7.0243e-07	3.54975e-05	0.24794	0.175815	0.198436	0.190153		mov34 family protein, putative, expressed
LOC_Os05g48280	Allelic imprinted PEG	1		PEG	-1.55245	8.27821	24.449	7.63029e-07	3.83713e-05	0.20094	0.26686	0.279043	0.266442		biallele	-1.79327	7.31016	20.1916	7.00612e-06	0.000305532	0.329815	0.164968	0.179463	0.211609		expressed protein
LOC_Os05g48560	Locus-imprinted PEG	1		PEG	-4.43982	6.18746	58.8544	1.69785e-14	2.28979e-12	0.0236613	0.0116686	0.120567	0.0909091		PEG	-7.30119	7.33474	128.122	1.05532e-29	4.78203e-27	0.00957354	0.00369549	0.00221484	0.00538951		expressed protein
LOC_Os05g48590	Allelic imprinted PEG	0.0477024		biallele	-2.30827	4.38661	18.1732	2.01698e-05	0.000795797	0.0983607	0.300448	0.151832	0.116981		PEG	-2.62184	3.92285	21.1166	4.32179e-06	0.000195184	0.118421	0.0967742	0.196078	0.111969		OsIAA19 - Auxin-responsive Aux/IAA gene family member, expressed
LOC_Os05g48610	Locus-imprinted MEG	1		MEG	4.30203	6.86621	20.6891	5.40214e-06	0.00010657	0.980831	1	0.749298	0.833663		MEG	5.09238	6.94684	25.7059	3.9762e-07	1.33134e-05	0.998228	0.992417	0.817889	0.816327		expressed protein
LOC_Os05g48970	Unclassified PEG	1		PEG	-5.30909	3.29786	23.3711	1.33569e-06	6.49669e-05	0	0	0.0632911	0.132075		unknown	n.d.	n.d.	n.d.	n.d.	n.d.	n.d.	n.d.	n.d.	n.d.		zinc finger, C3HC4 type domain containing protein, expressed
LOC_Os05g48980	Locus-imprinted PEG	1		PEG	-4.71332	3.46787	19.5262	9.92279e-06	0.000413496	0	0	0.195122	0.101695		PEG	-9.17837	2.99774	51.0105	9.18754e-13	9.39063e-11	0	0	0	0		ras-related protein, putative, expressed
LOC_Os05g49120	Unclassified PEG	1		PEG	-6.51808	0.824542	11.9136	0.000557271	0.0165674	0	0	0	0		unknown	n.d.	n.d.	n.d.	n.d.	n.d.	n.d.	n.d.	n.d.	n.d.		NLI interacting factor-like phosphatase, putative, expressed
LOC_Os05g50390	Locus-imprinted MEG	1		MEG	9.97077	3.80626	59.3618	1.31192e-14	9.22382e-13	1	1	1	1		MEG	8.36037	2.33067	31.5792	1.91467e-08	8.3423e-07	1	1	1	1		expressed protein
LOC_Os05g50960	Allelic imprinted PEG	1		PEG	-1.84111	5.0119	18.1473	2.04457e-05	0.00080454	0.282443	0.258621	0.155015	0.191111		biallele	-2.28665	4.49405	14.0694	0.000176188	0.00607894	0.245283	0.344978	0.0843373	0.0702703		polygalacturonase, putative, expressed
LOC_Os05g50970	Locus-imprinted PEG	1		PEG	-4.82095	3.19866	17.6049	2.71888e-05	0.00104765	0	0	0.105263	0.2		PEG	-5.91834	2.68258	24.1257	9.02467e-07	4.47742e-05	0	0	0.0769231	0		protein phosphatase 2C, putative, expressed
LOC_Os05g51400	Allelic imprinted PEG	1		biallele	-3.15153	6.83723	17.6815	2.61149e-05	0.00101153	0.0258427	0.0226209	0.29003	0.372781		PEG	-3.46329	6.55235	34.0839	5.27851e-09	3.53478e-07	0.0265096	0.046729	0.200855	0.113924		protein kinase APK1B, chloroplast precursor, putative, expressed
LOC_Os06g01680	Locus-imprinted PEG	1		PEG	-1.93049	7.42526	41.7956	1.01333e-10	8.79112e-09	0.187594	0.209671	0.217789	0.213066		PEG	-1.82331	7.64297	24.0703	9.28797e-07	4.55815e-05	0.247377	0.174137	0.182166	0.210424		expressed protein
LOC_Os06g02028	Locus-imprinted PEG	1		PEG	-4.04468	8.38835	111.843	3.86661e-26	1.36574e-23	0.0449634	0.0365396	0.0868582	0.0703583		PEG	-4.8415	7.85949	103.153	3.10177e-24	8.78448e-22	0.0324826	0.0199081	0.03386	0.0441341		eyes absent homolog 4, putative, expressed
LOC_Os06g04920	Unclassified PEG	1		PEG	-4.044	1.79571	9.74132	0.00180172	0.046243	0.257143	0.0212766	0	0		unknown	n.d.	n.d.	n.d.	n.d.	n.d.	n.d.	n.d.	n.d.	n.d.		zinc finger family protein, putative, expressed
LOC_Os06g04930	Unclassified PEG	0.178428		PEG	-4.40745	9.63542	83.6391	5.9387e-20	1.44427e-17	0.0311864	0.027627	0.0635674	0.0684747		unknown	n.d.	n.d.	n.d.	n.d.	n.d.	n.d.	n.d.	n.d.	n.d.		expressed protein
LOC_Os06g04940	Unclassified PEG	0.0177813		PEG	-5.14369	2.14721	17.2684	3.24534e-05	0.00123448	0	0	0.0188679	0.027027		unknown	n.d.	n.d.	n.d.	n.d.	n.d.	n.d.	n.d.	n.d.	n.d.		early nodulin 93 ENOD93 protein, putative, expressed
LOC_Os06g06870	Locus-imprinted PEG	1		PEG	-5.91974	3.80262	33.8172	6.05422e-09	4.1837e-07	0	0	0.114286	0.023622		PEG	-6.26374	4.3883	54.3612	1.66822e-13	1.82885e-11	0.0395137	0	0	0.0107527		zinc finger protein, putative, expressed
LOC_Os06g07700	Unclassified PEG	1		PEG	-3.97041	4.37952	30.7126	2.99218e-08	1.88089e-06	0.00421941	0.0501931	0.125828	0.0769231		unknown	n.d.	n.d.	n.d.	n.d.	n.d.	n.d.	n.d.	n.d.	n.d.		expressed protein
LOC_Os06g08740	Locus-imprinted PEG	1		PEG	-4.63959	7.49526	125.785	3.42747e-29	1.45276e-26	0.0132066	0.0476948	0.0529066	0.0465686		PEG	-4.78238	7.45819	63.0126	2.05387e-15	2.71071e-13	0.0986167	0.0292035	0.0218623	0.0083151		expressed protein
LOC_Os06g10480	Unclassified PEG	1		unknown	n.d.	n.d.	n.d.	n.d.	n.d.	n.d.	n.d.	n.d.	n.d.		PEG	-4.97534	1.56886	11.3007	0.000774794	0.0230471	0.135135	0	0	0		expressed protein
LOC_Os06g11620	Locus-imprinted PEG	1		PEG	-2.79697	6.56105	28.2166	1.08469e-07	6.11841e-06	0.0179445	0.119438	0.211268	0.226		PEG	-2.67618	3.88708	19.3012	1.11637e-05	0.000472772	0.122302	0.0545455	0.207547	0.121951		RNA recognition motif containing protein, putative, expressed
LOC_Os06g11730	Locus-imprinted MEG	1		MEG	5.54065	5.57973	106.483	5.77819e-25	1.11324e-22	0.989542	0.976645	0.970443	0.955307		MEG	5.51498	3.8242	45.5168	1.51335e-11	1.08276e-09	0.972477	0.935484	1	1		RNA recognition motif containing protein, putative, expressed
LOC_Os06g11760	Allelic imprinted MEG	1		MEG	6.06351	0.689234	10.6047	0.00112804	0.0132497	1	1	1	1		biallele	1.47628	1.24079	1.05687	0.303931	0.999021	0.72973	1	1	0.142857		expressed protein
LOC_Os06g12280	Unclassified PEG	0.197879		PEG	-2.92093	3.73883	21.8036	3.0203e-06	0.000139149	0.0654206	0.0874525	0.214953	0.113208		unknown	n.d.	n.d.	n.d.	n.d.	n.d.	n.d.	n.d.	n.d.	n.d.		glycosyl transferase 8 domain containing protein, putative, expressed
LOC_Os06g12590	Locus-imprinted PEG	1		PEG	-2.99704	4.29957	27.2914	1.74991e-07	9.57932e-06	0.0457143	0.115385	0.115385	0.188406		PEG	-5.27602	2.63203	22.972	1.64382e-06	7.89612e-05	0.0736842	0	0.0136986	0		protein kinase, putative, expressed
LOC_Os06g12680	Unclassified PEG	1		PEG	-2.96301	3.42392	17.7228	2.5554e-05	0.000992392	0.0708661	0.0645161	0.0877193	0.261538		unknown	n.d.	n.d.	n.d.	n.d.	n.d.	n.d.	n.d.	n.d.	n.d.		RING-H2 finger protein, putative, expressed
LOC_Os06g13750	Unclassified MEG	1		MEG	6.2925	0.832905	9.07823	0.00258671	0.0272537	1	1	1	1		unknown	n.d.	n.d.	n.d.	n.d.	n.d.	n.d.	n.d.	n.d.	n.d.		expressed protein
LOC_Os06g14440	Allelic imprinted PEG	1		biallele	-1.55657	3.75767	5.19396	0.0226655	0.365084	0.413793	0.0805369	0.462185	0.293103		PEG	-2.34021	3.84072	15.8108	7.00017e-05	0.00255121	0.181818	0.112583	0.238095	0.106061		DRD1, putative, expressed
LOC_Os06g19650	Allelic imprinted PEG	1		biallele	-1.50371	6.27361	18.8164	1.43924e-05	0.000582998	0.249012	0.175024	0.304229	0.314286		PEG	-2.06647	4.45973	16.0828	6.06336e-05	0.00225823	0.179916	0.195592	0.140893	0.203463		expressed protein
LOC_Os06g19660	Allelic imprinted PEG	1		PEG	-2.55766	4.95905	32.3552	1.28416e-08	8.42945e-07	0.149038	0.205714	0.15	0.0793651		biallele	-1.53858	4.56243	7.97976	0.00473032	0.114624	0.231608	0.151703	0.226519	0.325581		WD domain, G-beta repeat domain containing protein, expressed
LOC_Os06g21600	Allelic imprinted PEG	1		PEG	-2.83394	4.02564	10.6483	0.00110172	0.0300933	0	0.104478	0.295775	0.243243		biallele	-2.02293	3.60055	8.16111	0.00427981	0.104828	0.18894	0.0707071	0.171429	0.341176		selenoprotein O, putative, expressed
LOC_Os06g21900	Locus-imprinted PEG	0.183291		PEG	-4.72148	7.50997	109.515	1.25142e-25	4.21929e-23	0.0348028	0.0123344	0.0537408	0.0504673		PEG	-5.4742	7.71916	92.0658	8.38437e-22	1.89962e-19	0.0234657	0.0188165	0.0186235	0.0213777		expressed protein
LOC_Os06g23460	Locus-imprinted PEG	1		PEG	-2.84471	4.89073	37.4178	9.53489e-10	7.14394e-08	0.170029	0.153374	0.107143	0.0660793		PEG	-3.16686	5.04741	29.4641	5.69613e-08	3.29503e-06	0.0232558	0.136069	0.117808	0.0917647		KH domain containing protein, putative, expressed
LOC_Os06g28820	Unclassified PEG	1		unknown	n.d.	n.d.	n.d.	n.d.	n.d.	n.d.	n.d.	n.d.	n.d.		PEG	-7.22218	1.25893	17.8771	2.35634e-05	0.000939359	0	0	0	0		cycloartenol synthase, putative, expressed
LOC_Os06g29740	Allelic imprinted MEG	1		MEG	7.52138	1.86664	22.1281	2.55055e-06	5.35183e-05	1	1	1	1		biallele	7.56069	1.78345	14.6267	0.000131042	0.00245032	1	1	NA	NA		OsFBX197 - F-box domain containing protein, expressed
LOC_Os06g30060	Locus-imprinted PEG	1		PEG	-4.5636	6.41029	27.1104	1.92162e-07	1.04806e-05	0	0.0151976	0.120321	0.164527		PEG	-8.08033	6.78897	120.711	4.42136e-28	1.71725e-25	0.0113163	0.000752445	0.000877963	0.0011534		expressed protein
LOC_Os06g30280	Locus-imprinted MEG	1		MEG	8.82309	6.56534	174.648	7.14667e-40	3.78646e-37	1	1	0.995559	1		MEG	8.25084	2.41938	25.3306	4.82993e-07	1.5973e-05	1	1	1	1		expressed protein
LOC_Os06g32944	Unclassified MEG	1		MEG	7.15355	1.55395	17.4959	2.87922e-05	0.000488151	1	1	1	1		unknown	n.d.	n.d.	n.d.	n.d.	n.d.	n.d.	n.d.	n.d.	n.d.		transposon%20protein%2C%20putative%2C%20Pong%20sub-class%2C%20expressed
LOC_Os06g33480	Locus-imprinted MEG	1		MEG	3.69809	5.70808	23.0903	1.54569e-06	3.34748e-05	0.919512	1	0.914373	0.822222		MEG	4.02601	5.69977	32.4703	1.21026e-08	5.53948e-07	0.95279	0.91606	0.983051	0.896907		CAPIP1, putative, expressed
LOC_Os06g33640	Locus-imprinted MEG	1		MEG	8.97211	9.94123	160.817	7.50237e-37	3.17993e-34	0.994849	0.99896	0.998252	0.998497		MEG	11.155	8.86155	191.772	1.30466e-43	2.53366e-40	1	0.999019	0.999715	0.999584		CAPIP1, putative, expressed
LOC_Os06g33690	Locus-imprinted MEG	1		MEG	6.97693	8.51435	218.331	2.09158e-49	2.06857e-46	0.993789	0.99004	0.992228	0.98962		MEG	8.0077	6.8191	114.584	9.70885e-27	3.14243e-24	0.991984	0.999161	0.998358	0.983437		CAPIP1, putative, expressed
LOC_Os06g35030	Allelic imprinted PEG	1		biallele	-1.03676	6.17047	7.38098	0.00659172	0.137924	0.43554	0.374022	0.243619	0.259797		PEG	-1.66842	5.20059	12.0587	0.000515505	0.0158547	0.235955	0.25812	0.242105	0.148387		RNA recognition motif containing protein, putative, expressed
LOC_Os06g35160	Allelic imprinted PEG	1		biallele	-2.96349	5.0714	18.5146	1.68605e-05	0.000672382	0.0108696	0.0961538	0.135135	0.333333		PEG	-2.94354	4.73332	26.8709	2.17511e-07	1.17335e-05	0.0652557	0.0679012	0.176	0.148438		CAMK KIN1/SNF1/Nim1 like.26 - CAMK includes calcium/calmodulin depedent protein kinases, expressed
LOC_Os06g35530	Locus-imprinted PEG	1		PEG	-2.89366	6.33554	44.0071	3.27185e-11	2.95963e-09	0.0992366	0.043152	0.190123	0.183833		PEG	-3.85995	5.48984	25.9814	3.44715e-07	1.82337e-05	0.116041	0.144304	0.00140252	0.0523077		CGMC GSK.8 - CGMC includes CDA, MAPK, GSK3, and CLKC kinases, expressed
LOC_Os06g37300	Unclassified MEG	1		MEG	6.33065	0.860181	11.01	0.000906206	0.0109475	1	1	1	1		unknown	n.d.	n.d.	n.d.	n.d.	n.d.	n.d.	n.d.	n.d.	n.d.		cytochrome P450, putative, expressed
LOC_Os06g40490	Locus-imprinted PEG	1		PEG	-6.5999	4.07953	62.8325	2.25052e-15	3.41513e-13	0	0	0.0232558	0.0315789		PEG	-6.85045	4.70071	76.2813	2.46002e-18	4.07824e-16	0	0.0107527	0	0.0159574		glycosyl hydrolases family 17, putative, expressed
LOC_Os06g40520	Unclassified MEG	1		MEG	2.49022	3.14673	9.50609	0.00204791	0.0221919	0.784173	0.709804	1	1		unknown	n.d.	n.d.	n.d.	n.d.	n.d.	n.d.	n.d.	n.d.	n.d.		TNP1, putative, expressed
LOC_Os06g42990	Locus-imprinted PEG	1		PEG	-3.86652	3.74188	31.7941	1.71414e-08	1.11045e-06	0.0206897	0.0628931	0.0727273	0.111111		PEG	-4.99181	3.57658	19.2513	1.14595e-05	0.000483789	0.106796	0.0724638	0	0		AP2 domain containing protein, expressed
LOC_Os06g45000	Allelic imprinted PEG	1		biallele	-1.69123	5.27492	11.6096	0.000656123	0.0191984	0.0925926	0.181818	0.358025	0.401198		PEG	-2.06448	5.67215	18.7196	1.51422e-05	0.000621882	0.118509	0.152174	0.236884	0.238095		ubiquitin-conjugating enzyme, putative, expressed
LOC_Os06g47290	Allelic imprinted PEG	1		biallele	-3.36342	1.80011	6.90289	0.00860566	0.172287	0	0.0384615	0.0434783	0.333333		PEG	-3.06312	2.43059	11.0945	0.000865831	0.0254764	0.12381	0.0265487	0.157895	0.117647		growth regulator related protein, putative, expressed
LOC_Os06g47294	Allelic imprinted PEG	0.0518189		biallele	-2.75123	3.07269	11.8977	0.000562019	0.0166418	0.030303	0.0731707	0.311111	0.16129		PEG	-3.60569	3.35047	10.2504	0.00136655	0.0384616	0	0	0.238095	0.234694		methyltransferase, putative, expressed
LOC_Os06g48660	Unclassified MEG	1		MEG	6.08331	0.731526	8.40518	0.00374154	0.0373273	1	1	1	1		unknown	n.d.	n.d.	n.d.	n.d.	n.d.	n.d.	n.d.	n.d.	n.d.		DEFL21 - Defensin and Defensin-like DEFL family, expressed
LOC_Os07g01400	Unclassified MEG	1		MEG	6.3559	1.16795	12.2709	0.000460068	0.0059922	1	1	1	1		unknown	n.d.	n.d.	n.d.	n.d.	n.d.	n.d.	n.d.	n.d.	n.d.		peroxidase precursor, putative, expressed
LOC_Os07g01450	Unclassified MEG	1		MEG	4.62469	6.1658	53.4537	2.64755e-13	1.60312e-11	0.975498	0.876923	0.984	0.982143		unknown	n.d.	n.d.	n.d.	n.d.	n.d.	n.d.	n.d.	n.d.	n.d.		DNA directed RNA polymerase, 7 kDa subunit domain containing protein, expressed
LOC_Os07g01900	Unclassified MEG	1		MEG	8.24096	2.3285	27.9351	1.25456e-07	3.32348e-06	1	1	1	1		unknown	n.d.	n.d.	n.d.	n.d.	n.d.	n.d.	n.d.	n.d.	n.d.		expressed protein
LOC_Os07g02280	Unclassified PEG	1		PEG	-7.10987	1.33849	14.4735	0.000142142	0.00480335	0	0	0	0		unknown	n.d.	n.d.	n.d.	n.d.	n.d.	n.d.	n.d.	n.d.	n.d.		pentatricopeptide, putative, expressed
LOC_Os07g06610	Locus-imprinted PEG	1		PEG	-5.17488	2.88147	21.7717	3.07091e-06	0.000141043	0	0.00990099	0.142857	0.0322581		PEG	-8.77679	2.61918	42.4868	7.11596e-11	5.758e-09	0	0	0	0		ubiquitin carboxyl-terminal hydrolase domain containing protein, expressed
LOC_Os07g06980	Unclassified PEG	1		PEG	-2.10506	7.00908	48.8354	2.78368e-12	3.03646e-10	0.176375	0.195961	0.19457	0.1807		unknown	n.d.	n.d.	n.d.	n.d.	n.d.	n.d.	n.d.	n.d.	n.d.		histone deacetylase, putative, expressed
LOC_Os07g08370	Allelic imprinted MEG	1		MEG	8.77249	2.84455	41.9636	9.29885e-11	3.73844e-09	1	1	1	1		biallele	1.79428	2.10923	0.718425	0.396661	1	1	0.980392	0.133333	0.333333		expressed protein
LOC_Os07g09020	Unclassified MEG	1		unknown	n.d.	n.d.	n.d.	n.d.	n.d.	n.d.	n.d.	n.d.	n.d.		MEG	6.48903	3.6844	39.4279	3.40393e-10	1.98597e-08	0.995122	0.869565	1	1		argonaute, putative, expressed
LOC_Os07g11120	Unclassified MEG	1		MEG	5.37812	6.95011	49.0245	2.5278e-12	1.33452e-10	0.994247	0.998319	0.901213	0.915344		unknown	n.d.	n.d.	n.d.	n.d.	n.d.	n.d.	n.d.	n.d.	n.d.		hydrolase, NUDIX family, domain containing protein, expressed
LOC_Os07g12130	Locus-imprinted MEG	1		MEG	6.98422	3.26761	45.2952	1.69464e-11	7.86416e-10	1	1	1	0.98		MEG	8.25868	2.35925	21.8576	2.9365e-06	8.20439e-05	1	1	1	1		MYB family transcription factor, putative, expressed
LOC_Os07g12260	Locus-imprinted MEG	1		MEG	5.40702	1.60957	11.5623	0.000673041	0.00842579	0.956522	1	1	1		MEG	8.76427	2.72589	33.6872	6.4725e-09	3.10909e-07	1	1	1	1		retrotransposon%20protein%2C%20putative%2C%20unclassified%2C%20expressed
LOC_Os07g12490	Locus-imprinted PEG	1		PEG	-8.48227	2.5617	39.9398	2.61909e-10	2.12318e-08	0	0	0	0		PEG	-7.99537	5.8524	146.686	9.19189e-34	6.94192e-31	0.00952381	0.0031679	0	0.00331126		KH domain containing protein, putative, expressed
LOC_Os07g17210	Allelic imprinted PEG	1		PEG	-5.55487	5.5863	11.1092	0.000858991	0.0243255	0	0	0.276923	0.222222		biallele	-5.28227	5.10974	10.8484	0.000988788	0.0284779	0	0	0.305019	0.167959		FAS1, putative, expressed
LOC_Os07g17460	Locus-imprinted PEG	1		PEG	-5.83197	5.16826	30.5407	3.26932e-08	2.03783e-06	0	0	0.0628931	0.11039		PEG	-7.05399	5.56354	106.558	5.56342e-25	1.75882e-22	0	0.00519481	0.00809717	0.0145396		OsFBL36 - F-box domain and LRR containing protein, expressed
LOC_Os07g17520	Unclassified PEG	1		PEG	-4.30307	1.70243	11.5565	0.000675131	0.019677	0	0	0.0555556	0.0588235		unknown	n.d.	n.d.	n.d.	n.d.	n.d.	n.d.	n.d.	n.d.	n.d.		expressed protein
LOC_Os07g18720	Locus-imprinted PEG	1		PEG	-5.58095	2.36213	20.1822	7.04044e-06	0.000304504	0	0	0	0.0625		PEG	-8.92815	2.81381	47.1054	6.72715e-12	6.35061e-10	0	0	0	0		tetratricopeptide repeat containing protein, putative, expressed
LOC_Os07g20110	Locus-imprinted MEG	1		MEG	7.39123	9.46444	173.467	1.2942e-39	6.62048e-37	0.996453	0.990761	0.994424	0.991421		MEG	7.9256	9.47195	130.287	3.54556e-30	1.60661e-27	0.996956	0.997879	0.99218	0.988885		expressed protein
LOC_Os07g27030	Locus-imprinted MEG	1		MEG	6.08148	0.681255	10.4923	0.00119875	0.0139807	1	1	1	1		MEG	7.91193	1.94125	21.9169	2.84719e-06	7.98034e-05	1	1	1	1		OsFBX236 - F-box domain containing protein, expressed
LOC_Os07g27110	Locus-imprinted PEG	1		PEG	-5.54772	4.99176	49.0428	2.50436e-12	2.77255e-10	0.00775194	0	0.0681818	0.0596491		PEG	-5.8034	5.11312	36.1867	1.79294e-09	1.29645e-07	0	0	0.0690265	0.0511464		RNA recognition motif containing protein, expressed
LOC_Os07g27150	Allelic imprinted PEG	1		PEG	-2.89381	2.74565	10.8259	0.00100088	0.0277532	0	0.113402	0.192982	0.206897		biallele	-2.88114	2.48664	9.58762	0.00195894	0.0526282	0.037037	0.195876	0.0985915	0.0566038		trafficking protein particle complex subunit 4, putative, expressed
LOC_Os07g27300	Locus-imprinted PEG	1		PEG	-3.20891	4.4743	29.6016	5.30625e-08	3.22616e-06	0.205298	0.124694	0.037037	0.056		PEG	-3.25825	3.97125	24.4715	7.54181e-07	3.78315e-05	0.0976744	0.254237	0.0406504	0.0484581		RNA-binding protein Luc7-like, putative, expressed
LOC_Os07g27450	Allelic imprinted PEG	0.29863		PEG	-5.46762	2.85731	34.8662	3.53153e-09	2.50671e-07	0	0.0222222	0.0545455	0.015873		biallele	-3.7757	2.98639	9.57133	0.0019764	0.0529924	0.0588235	0	0	0.211268		expressed protein
LOC_Os07g28850	Allelic imprinted MEG	1		biallele	1.14453	4.9949	4.10027	0.0428763	0.273131	0.679758	0.914013	0.509615	0.458128		MEG	2.73917	5.3311	22.2358	2.41136e-06	6.90105e-05	0.938776	0.750943	0.799197	0.767554		retrotransposon%20protein%2C%20putative%2C%20unclassified%2C%20expressed
LOC_Os07g32360	Locus-imprinted MEG	1		MEG	7.16178	1.67339	16.7476	4.26952e-05	0.000696026	1	1	1	1		MEG	7.22197	1.4422	17.7528	2.51544e-05	0.000567079	1	1	1	1		expressed protein
LOC_Os07g32774	Allelic imprinted PEG	1		biallele	-1.16081	5.72393	10.3331	0.00130668	0.0348388	0.272	0.260238	0.341772	0.360169		PEG	-2.16236	5.81856	18.3566	1.83183e-05	0.000741128	0.186704	0.207709	0.131894	0.155937		chorismate mutase/prephenate dehydratase, putative, expressed
LOC_Os07g34550	Locus-imprinted MEG	1		MEG	5.83779	1.80006	15.4868	8.3082e-05	0.00126542	1	0.972222	1	1		MEG	7.53177	3.50637	51.067	8.9268e-13	7.3546e-11	1	1	0.947368	1		retrotransposon%20protein%2C%20putative%2C%20unclassified%2C%20expressed
LOC_Os07g34620	Locus-imprinted MEG	1		MEG	3.97705	7.6339	148.112	4.48364e-34	1.54686e-31	0.916038	0.938616	0.93582	0.943775		MEG	4.98421	6.47175	101.851	5.98607e-24	1.50694e-21	0.980137	0.930844	0.957035	0.969925		expressed protein
LOC_Os07g39950	Allelic imprinted MEG	1		MEG	6.04741	0.654269	8.93066	0.00280422	0.0291117	1	1	1	1		biallele	0.17295	0.813044	0.0241755	0.876439	1	0.352941	0.235294	NA	1		mitotic checkpoint protein, putative, expressed
LOC_Os07g41160	Allelic imprinted PEG	1		biallele	-1.98317	1.39419	2.11427	0.145932	1	0.666667	0	0.428571	0.285714		PEG	-4.59421	1.39691	10.7819	0.00102498	0.0293956	0.027027	0	0	0.142857		protein of unknown function DUF1675 domain containing protein, expressed
LOC_Os07g41650	Locus-imprinted MEG	1		MEG	9.28162	5.50785	139.289	3.80826e-32	1.20203e-29	1	1	1	0.996262		MEG	11.0084	4.84875	97.2153	6.2184e-23	1.38579e-20	1	1	1	1		pectinesterase, putative, expressed
LOC_Os07g42390	Allelic imprinted MEG	1		biallele	0.651611	8.49781	4.20434	0.0403207	0.260295	0.604177	0.609628	0.551772	0.578316		MEG	8.86414	4.71732	99.8844	1.61556e-23	3.88779e-21	1	0.988372	1	1		DUF581 domain containing protein, expressed
LOC_Os07g42770	Locus-imprinted PEG	0.10938		PEG	-3.55967	3.95261	15.3651	8.86101e-05	0.0031224	0.174757	0	0.153846	0.0294118		PEG	-5.21946	4.13209	24.0986	9.15249e-07	4.50793e-05	0.0144928	0	0.185185	0		CAMK CAMK like.35 - CAMK includes calcium/calmodulin depedent protein kinases, expressed
LOC_Os07g43160	Locus-imprinted PEG	1		PEG	-2.11776	8.84389	33.1191	8.66851e-09	5.87202e-07	0.15031	0.139711	0.246291	0.224905		PEG	-3.00923	9.31117	35.2433	2.90982e-09	2.04954e-07	0.0917178	0.116804	0.10386	0.10239		uncharacterized glycosyl hydrolase Rv2006/MT2062, putative, expressed
LOC_Os07g45064	Unclassified PEG	1		unknown	n.d.	n.d.	n.d.	n.d.	n.d.	n.d.	n.d.	n.d.	n.d.		PEG	-2.13283	5.46832	19.8287	8.47011e-06	0.000364376	0.122271	0.207877	0.282555	0.121324		Phosphatidylinositol kinase and FAT containing domain protein, putative, expressed
LOC_Os07g45070	Locus-imprinted PEG	1		PEG	-3.55135	4.60908	36.0274	1.94563e-09	1.40797e-07	0.103896	0.0218688	0.0465116	0.15942		PEG	-2.53167	5.54167	28.6162	8.82391e-08	4.91608e-06	0.120101	0.115942	0.12766	0.187835		FAT domain-containing protein, putative, expressed
LOC_Os07g45400	Allelic imprinted PEG	1		PEG	-4.61911	6.79933	157.147	4.75386e-36	2.93848e-33	0.0261603	0.0360874	0.0430733	0.0516206		biallele	-2.14543	5.52216	9.89764	0.0016549	0.0455436	0.0686456	0.0601626	0.479612	0.286982		expressed protein
LOC_Os07g48110	Unclassified MEG	1		MEG	7.66647	1.82806	16.8395	4.06768e-05	0.000666784	1	1	1	1		unknown	n.d.	n.d.	n.d.	n.d.	n.d.	n.d.	n.d.	n.d.	n.d.		expressed protein
LOC_Os07g48160	Locus-imprinted PEG	0.149237		PEG	-8.15525	2.18642	34.1372	5.13595e-09	3.57708e-07	0	0	0	0		PEG	-6.67159	0.787865	11.0404	0.000891495	0.0260064	0	0	0	0		alpha-galactosidase precursor, putative, expressed
LOC_Os07g48170	Locus-imprinted PEG	1		PEG	-6.17266	4.79321	47.1069	6.72199e-12	7.07239e-10	0	0	0.0702341	0.00649351		PEG	-10.3461	4.1766	105.941	7.59707e-25	2.34715e-22	0	0	0	0		nucleotidyltransferase, putative, expressed
LOC_Os07g48180	Locus-imprinted PEG	0.201252		PEG	-3.52252	5.31061	64.3137	1.06107e-15	1.72978e-13	0.0778443	0.1	0.0742857	0.0688259		PEG	-4.27467	2.78573	19.7416	8.86509e-06	0.000378969	0.2	0.0169492	0.0114943	0.0632911		bZIP transcription factor domain containing protein, expressed
LOC_Os07g48400	Locus-imprinted MEG	1		MEG	11.257	5.37194	155.703	9.82846e-36	3.64513e-33	1	1	1	1		MEG	10.8594	4.69704	111.476	4.65454e-26	1.47149e-23	1	1	1	1		retrotransposon%20protein%2C%20putative%2C%20unclassified%2C%20expressed
LOC_Os07g49460	Allelic imprinted PEG	1		PEG	-3.00115	4.08421	30.0464	4.21836e-08	2.59665e-06	0.103448	0.159664	0.112245	0.0813953		biallele	-2.68346	3.89574	9.14487	0.00249416	0.0649533	0.337423	0.136364	0.0656934	0.0217391		response regulator receiver domain containing protein, expressed
LOC_Os08g01040	Locus-imprinted PEG	0.144148		PEG	-6.50906	2.22059	25.0121	5.69727e-07	2.90443e-05	0	0	0	0.0136986		PEG	-8.90229	2.75534	46.902	7.46281e-12	6.94859e-10	0	0	0	0		zinc finger, C3HC4 type domain containing protein, expressed
LOC_Os08g01054	Locus-imprinted PEG	1		PEG	-5.8484	6.22506	72.8602	1.39164e-17	2.64679e-15	0	0.0110263	0.0322581	0.0495356		PEG	-7.37077	6.6272	183	1.07245e-41	1.61988e-38	0.00775194	0.00143266	0.00727273	0.00528302		retrotransposon%20protein%2C%20putative%2C%20unclassified%2C%20expressed
LOC_Os08g01570	Locus-imprinted MEG	1		MEG	6.09345	4.89899	66.9627	2.767e-16	2.40049e-14	0.961783	1	0.988024	1		MEG	4.93694	3.53205	39.9613	2.59051e-10	1.54453e-08	0.942857	0.944444	1	0.968992		retrotransposon%20protein%2C%20putative%2C%20unclassified%2C%20expressed
LOC_Os08g01680	Allelic imprinted PEG	1		PEG	-7.84672	1.89294	23.6149	1.1767e-06	5.79455e-05	0	0	0	0		biallele	-4.05223	1.31253	5.50497	0.0189625	0.37251	0	0.027027	1	0		WD domain, G-beta repeat domain containing protein, expressed
LOC_Os08g03470	Unclassified MEG	1		unknown	n.d.	n.d.	n.d.	n.d.	n.d.	n.d.	n.d.	n.d.	n.d.		MEG	8.76315	4.505	96.6778	8.15787e-23	1.78868e-20	1	0.992982	1	1		MBTB15 - Bric-a-Brac, Tramtrack, Broad Complex BTB domain with Meprin and TRAF Homology MATH domain, expressed
LOC_Os08g04290	Locus-imprinted MEG	1		MEG	5.79024	5.23669	63.3814	1.70315e-15	1.32284e-13	0.910448	0.969945	1	1		MEG	7.0083	6.37744	74.9914	4.72758e-18	6.49158e-16	0.97579	0.976959	0.998165	1		WD domain, G-beta repeat domain containing protein, expressed
LOC_Os08g06330	Locus-imprinted MEG	1		MEG	3.40237	7.35721	101.645	6.6403e-24	1.14545e-21	0.904988	0.853525	0.934043	0.920343		MEG	3.4787	6.41201	50.5412	1.1669e-12	9.33112e-11	0.850746	0.849944	0.929317	0.953092		zinc finger C-x8-C-x5-C-x3-H type family protein, expressed
LOC_Os08g06420	Allelic imprinted PEG	1		biallele	-1.86808	8.30517	28.6392	8.71974e-08	5.07284e-06	0.148278	0.166251	0.303273	0.26138		PEG	-2.02739	7.72047	25.914	3.56969e-07	1.88087e-05	0.148676	0.154491	0.24738	0.18567		abhydrolase domain-containing protein FAM108C1, putative, expressed
LOC_Os08g08000	Locus-imprinted PEG	1		PEG	-3.75393	3.42875	18.4541	1.7405e-05	0.000690381	0.0413223	0	0.164835	0.142857		PEG	-6.49156	4.4009	54.6865	1.41371e-13	1.57524e-11	0.00389105	0	0.0471698	0.00358423		DNA binding protein, putative, expressed
LOC_Os08g08960	Locus-imprinted MEG	0.0128562		MEG	5.8467	0.71393	10.6081	0.00112591	0.0132352	1	1	1	1		MEG	6.39156	0.805958	11.4141	0.000728889	0.0111009	1	1	1	1		Cupin domain containing protein, expressed
LOC_Os08g09700	Locus-imprinted MEG	1		MEG	9.01808	6.01068	182.836	1.16457e-41	6.91057e-39	1	1	0.994505	1		MEG	4.69998	8.37631	30.2192	3.85877e-08	1.58958e-06	0.986947	0.994005	0.817831	0.829711		OsFBX270 - F-box domain containing protein, expressed
LOC_Os08g12750	Allelic imprinted PEG	1		PEG	-3.85668	4.28429	26.2088	3.0642e-07	1.63516e-05	0.0875576	0	0.0686275	0.0921986		biallele	-1.43026	3.89324	0.0298428	0.862848	1	0.981308	1	0	0		serine/threonine-protein kinase HT1, putative, expressed
LOC_Os08g13110	Locus-imprinted PEG	1		PEG	-7.67482	1.95462	25.8432	3.703e-07	1.95495e-05	0	0	0	0		PEG	-8.91151	2.88058	48.2176	3.81454e-12	3.70392e-10	0	0	0	0		hypothetical protein
LOC_Os08g13350	Locus-imprinted PEG	1		PEG	-4.74013	5.08591	50.8398	1.00223e-12	1.17071e-10	0	0.0193548	0.0963855	0.0644258		PEG	-4.88406	4.74043	56.2694	6.31902e-14	7.46963e-12	0.00934579	0.0241287	0.037037	0.0469799		expressed protein
LOC_Os08g19590	Allelic imprinted MEG	1		MEG	2.62853	6.21798	52.4598	4.39149e-13	2.60009e-11	0.8125	0.862003	0.879032	0.834061		biallele	1.30458	7.00219	1.59191	0.207053	0.891567	0.923402	0.929993	0.176471	0.287565		Homeobox domain containing protein, expressed
LOC_Os08g23590	Allelic imprinted MEG	1		MEG	7.65452	4.17673	55.8108	7.9791e-14	5.16899e-12	1	1	0.992593	1		biallele	6.31452	0.888227	8.29662	0.0039719	0.0489153	1	1	NA	NA		ankyrin repeat domain containing protein, expressed
LOC_Os08g24400	Locus-imprinted PEG	1		PEG	-7.23462	4.75914	92.151	8.03069e-22	2.33599e-19	0	0	0.027027	0.00980392		PEG	-3.86136	4.25714	18.7099	1.5219e-05	0.000623152	0.178248	0.205357	0	0.021097		SWP, putative, expressed
LOC_Os08g24420	Locus-imprinted PEG	1		PEG	-6.14225	5.85583	44.4117	2.66096e-11	2.48273e-09	0	0.00280636	0.047619	0.0712644		PEG	-4.4637	5.91248	15.9689	6.43928e-05	0.00237224	0.221239	0.207819	0	0.00760043		SWP, putative, expressed
LOC_Os08g27240	Locus-imprinted PEG	1		PEG	-5.41538	5.80604	83.2311	7.29994e-20	1.71896e-17	0.00543478	0.0101266	0.0294627	0.0635209		PEG	-5.29844	5.62317	65.0309	7.37314e-16	1.02276e-13	0.0222222	0.0279898	0.034555	0.00324324		ARID/BRIGHT DNA-binding domain containing protein, expressed
LOC_Os08g27860	Locus-imprinted PEG	1		PEG	-3.73166	6.08842	46.5784	8.80265e-12	8.98354e-10	0.0150892	0.0504282	0.165563	0.109023		PEG	-2.83232	5.76968	40.8854	1.61422e-10	1.26113e-08	0.0911017	0.0993151	0.125364	0.145086		EARLY flowering protein, putative, expressed
LOC_Os08g27870	Locus-imprinted MEG	1		MEG	12.6121	6.61631	285.312	5.22484e-64	1.10729e-60	1	1	1	1		MEG	10.0254	5.73227	153.143	3.56531e-35	2.6926e-32	1	1	1	0.996721		EARLY flowering protein, putative, expressed
LOC_Os08g28170	Allelic imprinted MEG	1		MEG	1.74916	6.25728	28.2563	1.06267e-07	2.86631e-06	0.772277	0.715823	0.75	0.770186		biallele	1.53478	4.89733	3.52991	0.060271	0.431223	0.483766	0.894081	0.975	0.728736		nucleobase-ascorbate transporter, putative, expressed
LOC_Os08g28940	Allelic imprinted MEG	1		MEG	7.19307	5.5858	123.493	1.08796e-28	2.88213e-26	1	1	0.996429	0.982935		biallele	2.7123	4.67049	1.15774	0.281934	0.983736	1	1	0.145349	0.204878		OsFBX289 - F-box domain containing protein, expressed
LOC_Os08g28960	Locus-imprinted MEG	1		MEG	8.63559	5.51352	150.063	1.67936e-34	5.93172e-32	1	1	0.99117	1		MEG	7.12205	5.21523	89.7397	2.71648e-21	5.12887e-19	1	0.995984	1	0.966197		expressed protein
LOC_Os08g29520	Allelic imprinted PEG	1		PEG	-2.83638	4.34775	29.0483	7.05978e-08	4.18927e-06	0.158537	0.165312	0.111111	0.0635838		biallele	-1.12598	3.90289	2.05073	0.152133	1	0.60199	0.551515	0.15508	0.0640394		cytochrome b561, putative, expressed
LOC_Os08g29580	Allelic imprinted MEG	1		biallele	6.38368	0.954855	6.6835	0.00973096	0.0832698	1	1	NA	NA		MEG	6.86953	1.09929	11.9514	0.000546052	0.00867177	1	1	1	1		expressed protein
LOC_Os08g33390	Allelic imprinted PEG	1		biallele	-1.78962	6.28461	23.4098	1.30912e-06	6.40952e-05	0.265574	0.311203	0.135615	0.198444		PEG	-1.77155	5.8063	18.7034	1.52712e-05	0.000623414	0.285505	0.210904	0.207084	0.148052		Regulator of chromosome condensation domain containing protein, expressed
LOC_Os08g35000	Allelic imprinted PEG	0.200397		PEG	-2.90326	3.11219	20.1086	7.31687e-06	0.000313716	0.13253	0.102941	0.121212	0.108108		biallele	0.432238	3.67334	0.170126	0.68	1	0.241026	0.275	0.982301	0.732143		ARID/BRIGHT DNA-binding domain containing protein, expressed
LOC_Os08g35050	Locus-imprinted PEG	0.244719		PEG	-4.93456	5.11088	80.5565	2.8251e-19	6.44775e-17	0.0375276	0.00950119	0.039604	0.0526316		PEG	-6.56945	5.20823	67.4162	2.19833e-16	3.17917e-14	0.0241187	0	0	0.011236		ARID/BRIGHT DNA-binding domain containing protein, expressed
LOC_Os08g38850	Unclassified MEG	0.167977		unknown	n.d.	n.d.	n.d.	n.d.	n.d.	n.d.	n.d.	n.d.	n.d.		MEG	5.36946	4.14449	51.1515	8.55033e-13	7.17489e-11	0.991215	0.99033	0.998487	0.998336		phosphatidylinositol transfer, putative, expressed
LOC_Os08g40620	Locus-imprinted PEG	1		PEG	-3.49428	4.85141	32.1143	1.45366e-08	9.5e-07	0.00840336	0.0660377	0.153846	0.143813		PEG	-4.27381	2.51938	15.21	9.61913e-05	0.00344112	0.0980392	0.12766	0	0.0144928		rabGAP/TBC domain-containing protein, putative, expressed
LOC_Os08g40820	Unclassified PEG	1		PEG	-4.98368	4.57434	74.4566	6.19851e-18	1.25966e-15	0.0199203	0.0583333	0.0131004	0.0357143		unknown	n.d.	n.d.	n.d.	n.d.	n.d.	n.d.	n.d.	n.d.	n.d.		expressed protein
LOC_Os08g41700	Locus-imprinted PEG	1		PEG	-9.07603	3.04535	59.8265	1.03601e-14	1.44993e-12	0	0	0	0		PEG	-7.27879	2.41823	32.2794	1.33524e-08	8.48191e-07	0	0.0117647	0	0		expressed protein
LOC_Os08g41710	Locus-imprinted PEG	1		PEG	-5.71482	7.19426	69.9369	6.1231e-17	1.10094e-14	0.000644745	0.0116329	0.0509506	0.0460993		PEG	-6.74981	6.53964	166.876	3.56032e-38	4.03325e-35	0.00669344	0.010846	0.0118343	0.00432432		FHA domain containing protein, putative, expressed
LOC_Os08g41790	Unclassified PEG	1		unknown	n.d.	n.d.	n.d.	n.d.	n.d.	n.d.	n.d.	n.d.	n.d.		PEG	-6.24096	3.86794	42.582	6.77813e-11	5.51748e-09	0	0.0526316	0.00358423	0		phosphoribulokinase/Uridine kinase family protein, expressed
LOC_Os08g42640	Locus-imprinted PEG	1		PEG	-4.48517	4.07133	29.3442	6.05982e-08	3.65437e-06	0	0.0196078	0.140625	0.10559		PEG	-6.01412	3.17453	32.2053	1.38709e-08	8.68945e-07	0.0105263	0	0	0.049505		zinc finger, C3HC4 type domain containing protein, expressed
LOC_Os08g42750	Allelic imprinted MEG	1		biallele	0.319814	5.91088	0.314328	0.575036	0.943174	0.711712	0.78543	0.240642	0.333333		MEG	2.76056	5.36774	12.4705	0.000413435	0.00680415	0.762069	0.924666	1	0.808333		CAMK CAMK like.37 - CAMK includes calcium/calmodulin depedent protein kinases, expressed
LOC_Os08g42980	Locus-imprinted PEG	1		PEG	-4.60932	4.2768	49.0792	2.45834e-12	2.74206e-10	0.0930233	0.00990099	0.0225564	0.0347826		PEG	-2.71353	6.22412	36.0147	1.95839e-09	1.40859e-07	0.0967742	0.0755149	0.229602	0.11811		la domain containing protein, expressed
LOC_Os08g44170	Unclassified MEG	1		unknown	n.d.	n.d.	n.d.	n.d.	n.d.	n.d.	n.d.	n.d.	n.d.		MEG	7.26432	1.43087	17.7215	2.55721e-05	0.000574591	1	1	1	1		transposon%20protein%2C%20putative%2C%20unclassified%2C%20expressed
LOC_Os08g44180	Allelic imprinted MEG	1		MEG	3.86428	2.20037	11.0501	0.000886817	0.0107308	0.953488	1	1	0.75		biallele	2.57975	1.56053	3.80487	0.0511038	0.378792	0.625	1	1	0.904762		expressed protein
LOC_Os08g44860	Locus-imprinted PEG	1		PEG	-2.5407	9.24867	30.7464	2.94044e-08	1.85623e-06	0.223414	0.23538	0.0897917	0.0868859		PEG	-2.83434	9.34481	26.3154	2.89967e-07	1.53977e-05	0.148152	0.26395	0.0584841	0.0595488		aminopeptidase, putative, expressed
LOC_Os08g45130	Allelic imprinted PEG	1		biallele	-4.18504	2.18036	7.92715	0.00486984	0.106952	0	0	0.304348	0.181818		PEG	-3.70988	2.59226	11.6651	0.000636832	0.0191529	0	0.05	0.0869565	0.214286		histone-lysine N-methyltransferase, putative, expressed
LOC_Os08g45240	Unclassified MEG	1		MEG	4.2648	1.46481	10.1104	0.00147435	0.0167345	1	0.941176	0.8	1		unknown	n.d.	n.d.	n.d.	n.d.	n.d.	n.d.	n.d.	n.d.	n.d.		RNA recognition motif containing protein, putative, expressed
LOC_Os09g02540	Allelic imprinted MEG	1		MEG	7.276	1.64135	18.1367	2.05602e-05	0.000360106	1	1	1	1		biallele	5.30821	0.0966261	7.16455	0.00743585	0.0819149	1	1	1	1		expressed protein
LOC_Os09g02690	Locus-imprinted MEG	1		MEG	11.8396	6.14267	217.757	2.79087e-49	2.58766e-46	1	1	1	1		MEG	11.7256	5.62225	141.109	1.52327e-32	9.86067e-30	1	1	1	1		expressed protein
LOC_Os09g03090	Locus-imprinted PEG	1		PEG	-6.76089	6.03526	81.6367	1.63546e-19	3.79094e-17	0	0	0.021879	0.0324575		PEG	-6.07441	5.66423	66.9726	2.75307e-16	3.93949e-14	0.0212766	0.00437956	0	0.0327381		expressed protein
LOC_Os09g03500	Locus-imprinted MEG	1		MEG	10.7223	6.78787	296.432	1.97349e-66	7.31917e-63	1	0.998551	1	1		MEG	9.30129	6.32582	178.383	1.09242e-40	1.23753e-37	1	0.992991	1	1		ZOS9-01 - C2H2 zinc finger protein, expressed
LOC_Os09g06910	Unclassified MEG	1		unknown	n.d.	n.d.	n.d.	n.d.	n.d.	n.d.	n.d.	n.d.	n.d.		MEG	6.2966	2.23853	23.9105	1.0092e-06	3.11089e-05	1	1	1	0.923077		retrotransposon%20protein%2C%20putative%2C%20unclassified%2C%20expressed
LOC_Os09g06950	Allelic imprinted MEG	1		biallele	7.51855	3.77479	30.9707	2.61958e-08	7.81921e-07	1	1	NA	0		MEG	7.99154	2.04192	23.3572	1.34536e-06	4.03726e-05	1	1	1	1		expressed protein
LOC_Os09g07940	Locus-imprinted MEG	1		MEG	7.16837	3.2833	46.5585	8.89227e-12	4.33937e-10	1	1	0.961538	1		MEG	7.97382	1.99822	25.4393	4.56527e-07	1.51737e-05	1	1	1	1		retrotransposon%20protein%2C%20putative%2C%20unclassified%2C%20expressed
LOC_Os09g10330	Locus-imprinted MEG	1		MEG	7.99364	5.34405	110.618	7.17415e-26	1.52041e-23	0.997175	1	0.981481	1		MEG	9.23628	5.67608	97.3931	5.68443e-23	1.2879e-20	1	0.997506	1	1		expressed protein
LOC_Os09g11380	Allelic imprinted MEG	1		biallele	7.58857	2.145	16.441	5.0189e-05	0.000807542	1	NA	1	1		MEG	5.59591	1.56314	15.0292	0.000105862	0.00205103	1	1	0.956522	1		expressed protein
LOC_Os09g11760	Unclassified PEG	1		PEG	-4.16194	1.80681	9.90015	0.00165265	0.0427872	0	0	0.0833333	0.2		unknown	n.d.	n.d.	n.d.	n.d.	n.d.	n.d.	n.d.	n.d.	n.d.		expressed protein
LOC_Os09g11900	Unclassified MEG	1		unknown	n.d.	n.d.	n.d.	n.d.	n.d.	n.d.	n.d.	n.d.	n.d.		MEG	6.32926	0.678339	11.8782	0.00056794	0.00897741	1	1	1	1		expressed protein
LOC_Os09g14680	Unclassified PEG	1		unknown	n.d.	n.d.	n.d.	n.d.	n.d.	n.d.	n.d.	n.d.	n.d.		PEG	-5.82772	3.1054	30.3257	3.65263e-08	2.15886e-06	0.00970874	0	0	0.0576923		expressed protein
LOC_Os09g15540	Unclassified MEG	1		MEG	1.87747	3.1056	8.56664	0.00342378	0.0345287	0.804878	0.714286	0.835294	0.746835		unknown	n.d.	n.d.	n.d.	n.d.	n.d.	n.d.	n.d.	n.d.	n.d.		OsFBX312 - F-box domain containing protein, expressed
LOC_Os09g16520	Locus-imprinted PEG	0.19601		PEG	-3.39575	4.59084	41.3181	1.29368e-10	1.10935e-08	0.111842	0.0409165	0.0873786	0.115646		PEG	-5.73428	5.12118	44.473	2.5789e-11	2.24728e-09	0.0322581	0.0650685	0	0.00425532		cytochrome b5-like Heme/Steroid binding domain containing protein, expressed
LOC_Os09g17620	Allelic imprinted MEG	1		biallele	1.18734	0.524833	0.511454	0.47451	0.908582	NA	0.793103	0.25	1		MEG	6.31751	0.725929	10.2265	0.00138437	0.0194412	1	1	1	1		ubiquitin domain-containing protein 2, putative, expressed
LOC_Os09g20010	Locus-imprinted PEG	1		PEG	-3.06135	5.73279	46.5801	8.79475e-12	8.98354e-10	0.0703851	0.0637813	0.190083	0.137363		PEG	-3.53643	5.52748	54.8797	1.28137e-13	1.45158e-11	0.0533333	0.0744467	0.104199	0.060241		SNF1-related protein kinase regulatory subunit beta-2, putative, expressed
LOC_Os09g20340	Unclassified PEG	1		unknown	n.d.	n.d.	n.d.	n.d.	n.d.	n.d.	n.d.	n.d.	n.d.		PEG	-1.88972	7.15312	26.4089	2.7626e-07	1.47273e-05	0.231816	0.254011	0.152991	0.164036		DUF630/DUF632 domains containing protein, putative, expressed
LOC_Os09g20650	Locus-imprinted PEG	1		PEG	-4.77126	4.38844	17.1364	3.47896e-05	0.00131659	0	0	0.207048	0.147368		PEG	-5.94781	3.05852	26.9586	2.07863e-07	1.12627e-05	0	0.0666667	0	0		OsFBX323 - F-box domain containing protein, expressed
LOC_Os09g23690	Allelic imprinted PEG	1		biallele	-1.22024	4.46815	6.7825	0.00920561	0.181603	0.374449	0.168142	0.31	0.341317		PEG	-2.02975	4.6776	15.2024	9.65784e-05	0.0034459	0.242424	0.246201	0.2	0.0831234		UBX domain containing protein, expressed
LOC_Os09g23720	Allelic imprinted PEG	1		PEG	-2.46328	3.90434	14.5675	0.000135228	0.00461173	0.0629371	0.228669	0.0642202	0.217391		biallele	-3.05345	2.80969	8.60317	0.00335579	0.0844788	0.165354	0.128205	0	0.282051		expressed protein
LOC_Os09g24290	Allelic imprinted MEG	1		biallele	2.45711	7.12355	29.8207	4.73904e-08	1.35721e-06	0.670075	0.731221	0.913043	0.921147		MEG	2.07387	8.24354	15.4348	8.5402e-05	0.00169482	0.741811	0.798664	0.773488	0.765692		agenet domain-containing protein, putative, expressed
LOC_Os09g25160	Unclassified MEG	1		unknown	n.d.	n.d.	n.d.	n.d.	n.d.	n.d.	n.d.	n.d.	n.d.		MEG	5.94085	1.85345	18.4013	1.78934e-05	0.000420836	0.9	1	1	1		retrotransposon%20protein%2C%20putative%2C%20unclassified%2C%20expressed
LOC_Os09g26470	Locus-imprinted MEG	1		MEG	7.50657	5.01223	112.886	2.28564e-26	5.13751e-24	1	0.99322	0.982301	1		MEG	5.96144	4.22766	44.4754	2.57575e-11	1.76842e-09	1	0.918367	1	1		zinc finger, C3HC4 type family protein, expressed
LOC_Os09g28150	Allelic imprinted MEG	1		MEG	6.5948	1.05524	11.9293	0.000552594	0.00704878	1	1	1	1		biallele	0.398298	1.87201	0.0811145	0.775793	1	NA	0.358025	0.68	0.727273		bifunctional monodehydroascorbate reductase and carbonic anhydrasenectarin-3 precursor, putative, expressed
LOC_Os09g28940	Locus-imprinted PEG	1		PEG	-5.56804	3.1177	33.0002	9.21497e-09	6.21382e-07	0	0	0.0769231	0.0392157		PEG	-6.48121	2.64195	31.6998	1.7994e-08	1.11694e-06	0	0.0322581	0	0		ubiquitin carboxyl-terminal hydrolase domain containing protein, expressed
LOC_Os09g32540	Allelic imprinted PEG	0.203624		biallele	-1.20135	7.3855	9.00355	0.00269456	0.0652101	0.565217	0.120773	0.303867	0.305192		PEG	-2.33868	5.57092	19.0657	1.26291e-05	0.000531518	0.142857	0.0598291	0.202899	0.247212		expressed protein
LOC_Os09g32750	Allelic imprinted PEG	1		PEG	-3.595	4.41939	14.6079	0.000132357	0.00452423	0	0.030303	0.299363	0.216216		biallele	-2.26286	3.43205	8.24534	0.00408568	0.101127	0.0894942	0.0659341	0.375	0.266667		FHA domain containing protein, putative, expressed
LOC_Os09g34880	Locus-imprinted MEG	1		MEG	11.5779	5.69645	183.931	6.71613e-42	4.15141e-39	1	1	1	1		MEG	11.1599	4.99769	116.963	2.92507e-27	1.04641e-24	1	1	1	1		basic region leucine zipper domain containing protein, expressed
LOC_Os09g34950	Locus-imprinted PEG	1		PEG	-5.52915	3.41889	44.284	2.84023e-11	2.60091e-09	0	0.0105263	0.0181818	0.046875		PEG	-4.0953	2.53576	15.7266	7.31885e-05	0.00265313	0	0.0731707	0.111111	0.010989		TCP family transcription factor, putative, expressed
LOC_Os09g34980	Unclassified MEG	1		MEG	6.3047	0.830868	9.29562	0.00229702	0.0246038	1	1	1	1		unknown	n.d.	n.d.	n.d.	n.d.	n.d.	n.d.	n.d.	n.d.	n.d.		zinc knuckle family protein, expressed
LOC_Os09g35600	Locus-imprinted MEG	1		MEG	3.87381	4.82133	23.0131	1.609e-06	3.47445e-05	0.989492	0.892552	1	0.714286		MEG	9.46708	3.39069	45.4208	1.58934e-11	1.13118e-09	1	1	1	1		MATE domain containing protein, expressed
LOC_Os09g35850	Unclassified PEG	1		PEG	-5.0171	4.73776	60.5341	7.23139e-15	1.04153e-12	0.00755668	0.0174326	0.0909091	0.0338983		unknown	n.d.	n.d.	n.d.	n.d.	n.d.	n.d.	n.d.	n.d.	n.d.		RNA recognition motif containing protein, putative, expressed
LOC_Os09g36470	Locus-imprinted MEG	1		MEG	9.64039	3.5577	62.8461	2.23509e-15	1.69171e-13	1	1	1	1		MEG	7.0407	2.75541	33.5415	6.97608e-09	3.33919e-07	0.973684	1	1	1		retrotransposon%20protein%2C%20putative%2C%20unclassified%2C%20expressed
LOC_Os09g36970	Locus-imprinted MEG	1		MEG	8.9698	2.94733	43.0467	5.345e-11	2.26552e-09	1	1	1	1		MEG	7.4493	3.20736	43.654	3.91871e-11	2.62418e-09	1	1	0.985075	1		expressed protein
LOC_Os10g01380	Locus-imprinted MEG	1		MEG	5.28593	3.12703	30.6933	3.02204e-08	8.91292e-07	1	0.918033	1	1		MEG	5.88064	2.39768	24.5008	7.42776e-07	2.35918e-05	1	1	0.939394	0.979381		CW7, putative, expressed
LOC_Os10g01480	Locus-imprinted PEG	1		PEG	-3.24655	6.96586	27.0623	1.96999e-07	1.0705e-05	0.0309278	0.0275495	0.272269	0.243973		PEG	-5.80195	7.08288	72.5517	1.62714e-17	2.54246e-15	0.00814901	0.0219033	0.00754976	0.0181311		Inositol 1, 3, 4-trisphosphate 5/6-kinase, putative, expressed
LOC_Os10g03870	Locus-imprinted MEG	1		MEG	8.10359	2.36664	30.4017	3.51214e-08	1.02564e-06	1	1	1	1		MEG	5.79856	3.43283	37.1249	1.10801e-09	5.95346e-08	0.938776	1	1	1		OsFBX353 - F-box domain containing protein, expressed
LOC_Os10g04890	Locus-imprinted PEG	1		PEG	-7.63252	6.96331	260.583	1.28078e-58	4.75011e-55	0	0.00874636	0.00508187	0.00446927		PEG	-9.55265	6.64576	190.063	3.08023e-43	5.98181e-40	0.00735294	0	0	0.000496771		expressed protein
LOC_Os10g04900	Locus-imprinted PEG	1		PEG	-5.92581	6.00814	71.1138	3.37206e-17	6.25307e-15	0	0	0.0451467	0.0405063		PEG	-10.082	5.54329	106.569	5.53247e-25	1.75882e-22	0	0.00346021	0	0		OsFBX364 - F-box domain containing protein, expressed
LOC_Os10g04980	Locus-imprinted PEG	1		PEG	-6.87753	6.95519	79.922	3.89484e-19	8.75454e-17	0	0	0.0234326	0.0328901		PEG	-6.74996	5.50357	89.4844	3.09069e-21	6.53299e-19	0	0.00613497	0.00456621	0.0203106		OsFBX365 - F-box domain containing protein, expressed
LOC_Os10g05500	Locus-imprinted PEG	1		PEG	-5.52597	5.08596	19.39	1.06564e-05	0.000440355	0	0.00112486	0.223684	0.0909091		PEG	-10.412	4.19494	100.252	1.34177e-23	3.72247e-21	0	0	0	0		OsFBX370 - F-box domain containing protein, expressed
LOC_Os10g05520	Locus-imprinted PEG	1		PEG	-8.17716	2.30066	31.2101	2.31561e-08	1.47434e-06	0	0	0	0		PEG	-9.15274	2.96972	53.3994	2.72181e-13	2.96002e-11	0	0	0	0		OsFBX371 - F-box domain containing protein, expressed
LOC_Os10g05780	Unclassified MEG	1		MEG	7.27366	1.5727	17.4716	2.9163e-05	0.000492188	1	1	1	1		unknown	n.d.	n.d.	n.d.	n.d.	n.d.	n.d.	n.d.	n.d.	n.d.		POT domain containing peptide transporter, putative, expressed
LOC_Os10g08640	Allelic imprinted MEG	1		biallele	2.16977	1.90265	2.03544	0.15367	0.610448	0.567568	1	0.909091	1		MEG	6.29303	0.684794	11.7556	0.000606608	0.00950026	1	1	1	1		expressed protein
LOC_Os10g11034	Allelic imprinted PEG	1		biallele	-0.613928	3.5864	0.998968	0.31756	1	0.675214	0.325714	0.303571	0.272727		PEG	-1.7341	4.46061	10.843	0.000991699	0.0285014	0.241706	0.267797	0.161458	0.207207		caffeine-induced death protein 1, putative, expressed
LOC_Os10g11260	Locus-imprinted PEG	1		PEG	-4.08461	3.12676	13.6098	0.000225002	0.00727213	0.234043	0	0.00813008	0.0208333		PEG	-4.89052	2.76489	21.487	3.56237e-06	0.000162146	0.0153846	0	0.0656934	0.00840336		ubiquitin-conjugating enzyme, putative, expressed
LOC_Os10g11580	Locus-imprinted MEG	1		MEG	4.42335	8.11362	156.46	6.71785e-36	2.55537e-33	0.946853	0.961135	0.946618	0.948617		MEG	5.90857	9.71306	48.8013	2.83246e-12	2.18775e-10	0.997959	0.973152	0.985754	0.973254		histone-like transcription factor and archaeal histone, putative, expressed
LOC_Os10g12760	Allelic imprinted MEG	1		biallele	-1.28124	3.3012	0.0681258	0.794085	0.996577	0	0.00460829	0.931034	1		MEG	4.89729	1.30446	8.40331	0.00374538	0.0466252	0.777778	1	1	1		retrotransposon%20protein%2C%20putative%2C%20unclassified%2C%20expressed
LOC_Os10g13460	Locus-imprinted MEG	1		MEG	8.08968	2.35748	27.8905	1.2838e-07	3.38882e-06	1	1	1	1		MEG	5.56446	1.43315	14.5938	0.000133349	0.00247982	0.947368	1	1	1		hypothetical protein
LOC_Os10g21810	Allelic imprinted PEG	1		biallele	-1.87409	3.28967	3.52137	0.0605824	0.683494	0	0.151515	0.658537	0.351852		PEG	-4.3907	2.55561	11.9985	0.000532421	0.0162646	0	0	0.2	0.0238095		histidine kinase, putative, expressed
LOC_Os10g22980	Allelic imprinted MEG	1		MEG	3.15466	5.8681	22.118	2.56388e-06	5.36906e-05	0.988024	0.949091	0.746224	0.709156		biallele	0.562427	6.5935	1.41957	0.233474	0.928295	0.418546	0.465452	0.688213	0.632		leucine rich repeat domain containing protein, putative, expressed
LOC_Os10g26430	Allelic imprinted MEG	1		biallele	2.65528	6.86363	22.1165	2.566e-06	5.36906e-05	0.660739	0.666214	0.945493	0.942959		MEG	2.23508	7.46077	14.874	0.000114935	0.00220061	0.707463	0.793321	0.826801	0.797327		agenet domain containing protein, expressed
LOC_Os10g27370	Locus-imprinted MEG	1		MEG	8.89382	3.02876	45.189	1.78907e-11	8.21698e-10	1	1	1	1		MEG	8.1492	2.15937	27.5117	1.56145e-07	5.78373e-06	1	1	1	1		transposon%20protein%2C%20putative%2C%20Pong%20sub-class%2C%20expressed
LOC_Os10g27390	Unclassified MEG	1		MEG	5.86489	0.558892	8.77084	0.00306084	0.0313156	1	1	1	1		unknown	n.d.	n.d.	n.d.	n.d.	n.d.	n.d.	n.d.	n.d.	n.d.		no apical meristem protein, putative, expressed
LOC_Os10g29560	Locus-imprinted MEG	1		MEG	2.59713	6.72663	48.0564	4.14124e-12	2.12887e-10	0.795148	0.76217	0.915984	0.879828		MEG	2.79281	5.63338	27.0239	2.00952e-07	7.26527e-06	0.742616	0.773655	0.93621	0.898305		transposon%20protein%2C%20putative%2C%20CACTA%2C%20En%2FSpm%20sub-class%2C%20expressed
LOC_Os10g31900	Unclassified MEG	1		MEG	5.95752	0.617013	9.30335	0.00228736	0.024518	1	1	1	1		unknown	n.d.	n.d.	n.d.	n.d.	n.d.	n.d.	n.d.	n.d.	n.d.		RNA recognition motif containing protein, putative, expressed
LOC_Os10g35220	Locus-imprinted PEG	1		PEG	-2.71558	5.63349	30.7	3.01169e-08	1.88517e-06	0.0454545	0.157652	0.199063	0.112613		PEG	-1.89033	5.79992	17.5453	2.80538e-05	0.00108651	0.173533	0.116057	0.281198	0.238208		KH domain containing protein, putative, expressed
LOC_Os10g36710	Locus-imprinted PEG	1		PEG	-7.05856	3.18526	46.808	7.82939e-12	8.1795e-10	0	0	0.0454545	0		PEG	-8.96421	4.12551	83.859	5.31351e-20	1.03188e-17	0	0	0	0.00719424		CAMK CAMK like.40 - CAMK includes calcium/calmodulin depedent protein kinases, expressed
LOC_Os10g37540	Locus-imprinted PEG	1		PEG	-5.3282	2.98697	25.2973	4.91387e-07	2.53997e-05	0	0.0909091	0	0		PEG	-5.75032	1.83684	15.9841	6.3876e-05	0.00236602	0.0291262	0	0	0		OsFBDUF48 - F-box and DUF domain containing protein, expressed
LOC_Os10g37830	Allelic imprinted MEG	1		MEG	2.43088	4.92125	28.1711	1.11049e-07	2.97905e-06	0.822581	0.748344	0.901408	0.835749		biallele	1.60474	4.59972	9.50916	0.00204448	0.0275011	0.756345	0.685131	0.752066	0.704142		OsFBX391 - F-box domain containing protein, expressed
LOC_Os10g39420	Unclassified MEG	1		unknown	n.d.	n.d.	n.d.	n.d.	n.d.	n.d.	n.d.	n.d.	n.d.		MEG	6.16435	8.2506	89.4633	3.12384e-21	5.81718e-19	0.99317	0.992726	0.9589	0.973956		CAMK CAMK like.8 - CAMK includes calcium/calmodulin depedent protein kinases, expressed
LOC_Os10g39780	Locus-imprinted PEG	1		PEG	-5.31115	6.6115	59.7855	1.05779e-14	1.46155e-12	0	0.0142096	0.0675547	0.0631579		PEG	-5.6312	6.3637	78.4681	8.13023e-19	1.45424e-16	0.00451128	0.00830368	0.0524738	0.0221607		protein phosphatase 2C, putative, expressed
LOC_Os10g41370	Unclassified PEG	1		PEG	-3.84371	1.83792	9.95744	0.00160201	0.0416214	0	0.142857	0.025641	0.0285714		unknown	n.d.	n.d.	n.d.	n.d.	n.d.	n.d.	n.d.	n.d.	n.d.		WD repeat-containing protein 8, putative, expressed
LOC_Os10g42690	Locus-imprinted PEG	1		PEG	-3.32803	4.04768	28.3629	1.00575e-07	5.6948e-06	0.015873	0.0787879	0.0967742	0.159091		PEG	-5.67066	3.38108	40.5701	1.89688e-10	1.47349e-08	0.0630631	0.0126582	0.0140845	0		jmjC domain containing protein, expressed
LOC_Os11g03220	Allelic imprinted MEG	1		MEG	4.56134	3.22175	18.7764	1.46978e-05	0.000264614	1	0.759036	1	1		biallele	3.82647	3.04614	5.20897	0.0224706	0.203237	0.58042	1	1	1		RNA binding protein, putative, expressed
LOC_Os11g05010	Locus-imprinted PEG	1		PEG	-2.06176	6.68876	40.6023	1.86587e-10	1.52941e-08	0.179173	0.135601	0.225718	0.240385		PEG	-3.42577	4.56808	17.4388	2.96711e-05	0.00114588	0.184211	0.159533	0	0.0606061		heavy-metal-associated domain-containing protein, putative, expressed
LOC_Os11g06580	Locus-imprinted PEG	1		PEG	-3.36486	3.14031	20.5455	5.8229e-06	0.000254067	0.060241	0.0380952	0.122807	0.185185		PEG	-7.43039	3.21883	50.3847	1.26375e-12	1.2632e-10	0	0	0	0.0119048		OsFBX397 - F-box domain containing protein, expressed
LOC_Os11g07910	Locus-imprinted PEG	1		PEG	-5.58303	5.93042	16.6617	4.46746e-05	0.0016652	0	0	0.191348	0.163375		PEG	-6.45065	5.68473	63.9649	1.26654e-15	1.70469e-13	0.00606061	0	0.0385208	0.00405954		transmembrane 9 superfamily member, putative, expressed
LOC_Os11g11200	Unclassified MEG	1		MEG	7.09535	1.46032	17.287	3.21375e-05	0.000539321	1	1	1	1		unknown	n.d.	n.d.	n.d.	n.d.	n.d.	n.d.	n.d.	n.d.	n.d.		expressed protein
LOC_Os11g13694	Unclassified PEG	1		unknown	n.d.	n.d.	n.d.	n.d.	n.d.	n.d.	n.d.	n.d.	n.d.		PEG	-1.74096	6.25463	20.3835	6.33732e-06	0.000279706	0.204819	0.256858	0.240418	0.168391		AGAP007117-PA, putative, expressed
LOC_Os11g13930	Unclassified MEG	1		unknown	n.d.	n.d.	n.d.	n.d.	n.d.	n.d.	n.d.	n.d.	n.d.		MEG	4.58623	1.78746	11.1217	0.000853216	0.0127598	0.916667	1	1	1		ZF-HD protein dimerisation region containing protein, expressed
LOC_Os11g15620	Unclassified MEG	1		unknown	n.d.	n.d.	n.d.	n.d.	n.d.	n.d.	n.d.	n.d.	n.d.		MEG	6.7243	3.16286	39.2058	3.81404e-10	2.19695e-08	0.973154	1	1	1		OsFBX420 - F-box domain containing protein, expressed
LOC_Os11g26020	Unclassified MEG	1		MEG	6.38723	0.929957	12.0161	0.000527416	0.00676835	1	1	1	1		unknown	n.d.	n.d.	n.d.	n.d.	n.d.	n.d.	n.d.	n.d.	n.d.		hypothetical protein
LOC_Os11g26030	Allelic imprinted MEG	1		MEG	2.64057	4.86912	26.1097	3.22557e-07	7.89626e-06	0.875371	0.725581	0.827273	0.956044		biallele	0.488025	3.64167	0.664693	0.414908	1	0.526104	0.477477	0.421488	0.716667		GTPase of unknown function domain containing protein, putative, expressed
LOC_Os11g26830	Locus-imprinted MEG	1		MEG	9.73598	3.56609	50.7373	1.05595e-12	5.86705e-11	1	1	1	1		MEG	10.4071	4.25217	90.5285	1.82332e-21	3.49103e-19	1	1	1	1		ATP-binding region, ATPase-like domain containing protein, expressed
LOC_Os11g27470	Locus-imprinted MEG	1		MEG	5.59473	5.26732	63.8675	1.33078e-15	1.04455e-13	1	0.993779	0.925373	0.954545		MEG	5.28239	5.58717	41.6294	1.10324e-10	6.87959e-09	0.997661	0.991507	0.925197	0.86376		expressed protein
LOC_Os11g28184	Allelic imprinted MEG	1		MEG	7.63151	1.88443	22.2055	2.44975e-06	5.17692e-05	1	1	1	1		biallele	5.93458	0.517604	7.89055	0.00496937	0.0589263	1	1	NA	1		expressed protein
LOC_Os11g31330	Locus-imprinted PEG	0.0777718		PEG	-5.76341	11.2174	66.5563	3.40038e-16	5.66793e-14	0.0104518	0.00618238	0.0378279	0.0368239		PEG	-7.08118	12.887	64.8269	8.17744e-16	1.12287e-13	0.00568362	0.00393155	0.00639544	0.0133199		no apical meristem protein, putative, expressed
LOC_Os11g31340	Locus-imprinted PEG	1		PEG	-6.04638	8.39945	28.3653	1.00451e-07	5.6948e-06	0.000457387	0.0034774	0.113452	0.0902461		PEG	-9.34038	8.29939	190.57	2.3872e-43	5.98181e-40	0.00181818	0.000741918	0.00151899	0.00246427		no apical meristem protein, putative, expressed
LOC_Os11g31360	Locus-imprinted PEG	1		PEG	-6.59378	7.90866	11.2211	0.000808731	0.0231422	0	0.000416493	0.232258	0.207018		PEG	-10.5382	8.03008	204.538	2.13573e-46	1.45166e-42	0.000481464	0	0.0017762	0.00303951		no apical meristem protein, putative, expressed
LOC_Os11g31380	Locus-imprinted PEG	1		PEG	-5.44765	8.56171	15.4854	8.31436e-05	0.00293675	0.00205867	0.000873362	0.207064	0.220831		PEG	-5.3272	8.31799	24.111	9.09383e-07	4.49533e-05	0.00658415	0.00260078	0.0234455	0.226989		no apical meristem protein, putative, expressed
LOC_Os11g31500	Allelic imprinted PEG	1		biallele	-1.14369	6.05328	6.39229	0.0114617	0.217158	0.17378	0.190367	0.493892	0.459119		PEG	-1.87307	5.47193	16.3517	5.26092e-05	0.00198108	0.198428	0.17268	0.283401	0.147348		ATP binding protein, putative, expressed
LOC_Os11g31600	Locus-imprinted MEG	1		MEG	8.76371	2.8487	42.0858	8.73564e-11	3.5505e-09	1	1	1	1		MEG	8.73308	2.66811	34.7979	3.65764e-09	1.82132e-07	1	1	1	1		hypothetical protein
LOC_Os11g34190	Allelic imprinted PEG	1		biallele	-1.71089	5.09955	16.182	5.75391e-05	0.00210579	0.232673	0.167421	0.189873	0.344538		PEG	-3.04748	4.83612	30.578	3.20706e-08	1.92906e-06	0.0815217	0.222973	0.0631579	0.0660592		expressed protein
LOC_Os11g36470	Allelic imprinted PEG	1		PEG	-1.88981	6.79015	34.5892	4.07154e-09	2.87626e-07	0.161361	0.187023	0.223077	0.278565		biallele	-1.61697	6.83128	17.7034	2.58167e-05	0.00100848	0.154615	0.368874	0.229839	0.196117		ubiquitin carboxyl-terminal hydrolase 21, putative, expressed
LOC_Os11g36760	Locus-imprinted MEG	1		MEG	6.93536	5.63937	118.515	1.33724e-27	3.30634e-25	1	0.982014	0.992832	1		MEG	6.8418	5.2533	106.629	5.36727e-25	1.58614e-22	0.983838	0.988785	0.995086	0.992883		transmembrane receptor, putative, expressed
LOC_Os11g36770	Locus-imprinted MEG	1		MEG	7.80238	1.95286	20.7614	5.20213e-06	0.000102898	1	1	1	1		MEG	8.52468	2.50122	32.2081	1.38511e-08	6.27641e-07	1	1	1	1		expressed protein
LOC_Os11g37520	Allelic imprinted PEG	1		PEG	-2.95494	4.01946	21.3178	3.89093e-06	0.000174761	0.129771	0.272727	0.0681818	0.0361446		biallele	-2.71574	2.29478	6.70625	0.00960753	0.214811	0.175258	0.217391	0	0.333333		BTBT3 - Bric-a-Brac, Tramtrack, Broad Complex BTB domain with tetratricopeptide repeats, expressed
LOC_Os11g37890	Locus-imprinted PEG	1		PEG	-4.44855	5.03649	39.1838	3.85724e-10	3.06001e-08	0.0159858	0.00956023	0.100529	0.132653		PEG	-4.97264	5.36697	22.2702	2.36854e-06	0.000111411	0.00258844	0.00606061	0.151335	0.125		NAD dependent epimerase/dehydratase family protein, putative, expressed
LOC_Os11g38630	Allelic imprinted MEG	1		MEG	3.77751	1.91453	8.12035	0.0043771	0.0427701	1	0.847619	1	1		biallele	0.577356	0.928128	0.0510155	0.821306	1	0.0731707	0.111111	1	1		expressed protein
LOC_Os11g38900	Locus-imprinted PEG	1		PEG	-4.56751	4.50113	39.8224	2.78143e-10	2.24253e-08	0	0.0301954	0.1	0.0697674		PEG	-6.119	4.08973	44.7756	2.20956e-11	1.93786e-09	0.026506	0	0	0.0212766		histone-lysine N-methyltransferase, H3 lysine-9 specific SUVH1, putative, expressed
LOC_Os11g38980	Locus-imprinted PEG	1		PEG	-5.29858	4.81115	42.9007	5.75915e-11	5.08554e-09	0.00578035	0.00292398	0.0697674	0.103448		PEG	-4.63564	5.45721	51.5348	7.03376e-13	7.299e-11	0.0620438	0.0265152	0.00909091	0.0459364		F-box/Kelch-repeat protein, putative, expressed
LOC_Os11g39330	Allelic imprinted MEG	1		MEG	7.06441	1.3689	15.1635	9.85919e-05	0.00148188	1	1	1	1		biallele	0.634444	0.926484	0.0195146	0.888901	1	1	1	0	1		NB-ARC domain containing protein, putative, expressed
LOC_Os11g40530	Locus-imprinted MEG	1		MEG	11.3486	5.41564	158.515	2.38804e-36	9.84072e-34	1	1	1	1		MEG	6.97217	3.53654	35.7553	2.2372e-09	1.14764e-07	1	0.988338	1	1		LTPL162 - Protease inhibitor/seed storage/LTP family protein precursor, expressed
LOC_Os11g41890	Locus-imprinted MEG	1		MEG	1.81715	9.43515	20.799	5.10098e-06	0.000101438	0.742083	0.758474	0.766677	0.775016		MEG	1.79061	8.3018	22.6915	1.90205e-06	5.53671e-05	0.72093	0.758984	0.723234	0.764836		RNA recognition motif containing protein, putative, expressed
LOC_Os11g45590	Locus-imprinted PEG	1		PEG	-2.48697	5.30186	36.5119	1.5174e-09	1.1089e-07	0.137097	0.190789	0.117825	0.162963		PEG	-2.26324	5.82842	20.5993	5.66155e-06	0.000251513	0.244027	0.128548	0.102119	0.137589		transposon%20protein%2C%20putative%2C%20CACTA%2C%20En%2FSpm%20sub-class%2C%20expressed
LOC_Os12g02440	Allelic imprinted PEG	1		biallele	-3.28737	2.52636	5.57302	0.0182393	0.309943	0	0	0.321429	0.428571		PEG	-5.50568	2.88328	21.5364	3.4718e-06	0.000159445	0	0.00877193	0.0526316	0		WRKY95, expressed
LOC_Os12g02970	Unclassified MEG	1		MEG	4.35528	3.80947	16.8078	4.1363e-05	0.000677284	1	0.752727	1	1		unknown	n.d.	n.d.	n.d.	n.d.	n.d.	n.d.	n.d.	n.d.	n.d.		RNA binding protein, putative, expressed
LOC_Os12g03250	Unclassified MEG	1		MEG	10.3836	4.21029	80.0204	3.70566e-19	4.54327e-17	1	1	1	1		unknown	n.d.	n.d.	n.d.	n.d.	n.d.	n.d.	n.d.	n.d.	n.d.		retrotransposon%20protein%2C%20putative%2C%20unclassified%2C%20expressed
LOC_Os12g05040	Locus-imprinted PEG	1		PEG	-2.56064	7.97418	69.2651	8.60804e-17	1.50236e-14	0.144452	0.132588	0.152659	0.146226		PEG	-3.39966	6.85745	61.7829	3.83489e-15	5.01265e-13	0.0939275	0.123336	0.0445283	0.0745209		heavy-metal-associated domain-containing protein, putative, expressed
LOC_Os12g06180	Unclassified PEG	1		PEG	-5.40625	5.42412	37.3546	9.84908e-10	7.34227e-08	0	0	0.0688935	0.0990991		unknown	n.d.	n.d.	n.d.	n.d.	n.d.	n.d.	n.d.	n.d.	n.d.		HVA22, putative, expressed
LOC_Os12g06190	Unclassified PEG	1		PEG	-5.4297	2.23833	17.8938	2.33576e-05	0.000911867	0	0	0	0.111111		unknown	n.d.	n.d.	n.d.	n.d.	n.d.	n.d.	n.d.	n.d.	n.d.		expressed protein
LOC_Os12g06480	Unclassified MEG	1		MEG	9.36511	3.48425	63.0565	2.00866e-15	1.52813e-13	1	1	1	1		unknown	n.d.	n.d.	n.d.	n.d.	n.d.	n.d.	n.d.	n.d.	n.d.		PHD-finger family protein, expressed
LOC_Os12g06630	Allelic imprinted PEG	1		biallele	-1.68203	6.0836	14.7834	0.000120594	0.0041702	0.206133	0.0949721	0.356643	0.335616		PEG	-1.93166	5.62555	18.8145	1.44068e-05	0.000593473	0.147059	0.280899	0.180583	0.163366		OsFBT14 - F-box and tubby domain containing protein, expressed
LOC_Os12g07120	Locus-imprinted PEG	1		PEG	-3.73908	6.98557	90.4422	1.90461e-21	5.43363e-19	0.119718	0.0891566	0.0522708	0.0361217		PEG	-4.92787	6.63556	64.7217	8.62603e-16	1.17262e-13	0.0817757	0.0683761	0.0109184	0.00932256		GATA zinc finger domain containing protein, expressed
LOC_Os12g08780	Unclassified PEG	1		unknown	n.d.	n.d.	n.d.	n.d.	n.d.	n.d.	n.d.	n.d.	n.d.		PEG	-4.71267	4.73541	20.4553	6.10391e-06	0.000270282	0.00103842	0.0660793	0	0.102041		flavin monooxygenase, putative, expressed
LOC_Os12g13450	Unclassified MEG	1		unknown	n.d.	n.d.	n.d.	n.d.	n.d.	n.d.	n.d.	n.d.	n.d.		MEG	7.5322	1.64484	19.9135	8.10248e-06	0.000204351	1	1	1	1		retrotransposon%20protein%2C%20putative%2C%20unclassified%2C%20expressed
LOC_Os12g16600	Unclassified MEG	1		MEG	9.31987	3.29265	55.0756	1.15984e-13	7.35309e-12	1	1	1	1		unknown	n.d.	n.d.	n.d.	n.d.	n.d.	n.d.	n.d.	n.d.	n.d.		expressed protein
LOC_Os12g17670	Locus-imprinted MEG	0.158798		MEG	5.34231	1.69365	14.9478	0.000110526	0.00164623	1	1	0.987952	1		MEG	6.04137	0.482486	10.9287	0.000946852	0.014006	1	1	1	1		expressed protein
LOC_Os12g17710	Locus-imprinted MEG	1		MEG	8.87152	2.93127	45.1822	1.79528e-11	8.22005e-10	1	1	1	1		MEG	7.47341	3.2979	48.7363	2.92792e-12	2.24871e-10	0.981481	1	1	1		expressed protein
LOC_Os12g19290	Allelic imprinted PEG	1		biallele	-4.10651	4.71089	5.78059	0.0162041	0.283143	0	0	0.504065	0.404082		PEG	-8.11182	2.03165	28.7781	8.11649e-08	4.55932e-06	0	0	0	0		AGC AGC other NDRh TRCd.4 - ACG kinases include homologs to PKA, PKG and PKC, expressed
LOC_Os12g22650	Allelic imprinted MEG	1		biallele	7.67624	1.83649	13.7661	0.000207044	0.00294487	1	1	NA	NA		MEG	7.88571	3.94058	50.6255	1.11785e-12	9.01421e-11	1	1	0.95122	1		histone H3, putative, expressed
LOC_Os12g22680	Locus-imprinted MEG	1		MEG	9.99236	6.50265	224.125	1.13926e-50	1.30007e-47	0.997372	1	1	1		MEG	7.9956	6.47142	127.044	1.81667e-29	7.34982e-27	1	0.997984	0.985267	0.987368		histone H3, putative, expressed
LOC_Os12g23040	Locus-imprinted MEG	1		MEG	5.34173	4.91269	63.1474	1.91807e-15	1.47433e-13	1	0.954717	1	0.945355		MEG	7.18145	4.1345	65.1437	6.96308e-16	8.68405e-14	1	1	1	0.966667		transposon%20protein%2C%20putative%2C%20Mutator%20sub-class%2C%20expressed
LOC_Os12g27994	Locus-imprinted MEG	1		MEG	3.42458	5.74266	26.3516	2.84587e-07	7.03641e-06	0.91195	0.795	1	0.896714		MEG	3.40398	7.26533	84.9893	2.99976e-20	5.16187e-18	0.898198	0.883721	0.897401	0.911082		expressed protein
LOC_Os12g31350	Locus-imprinted PEG	1		PEG	-5.38363	6.37212	62.8241	2.26021e-15	3.41513e-13	0	0.0140656	0.0584795	0.0521978		PEG	-7.45349	6.13631	88.8516	4.25574e-21	8.76554e-19	0.0195695	0	0.00117786	0.00210526		SSXT protein, putative, expressed
LOC_Os12g32060	Allelic imprinted PEG	1		PEG	-3.55531	3.41304	15.7214	7.33909e-05	0.00262984	0	0.0769231	0.125	0.2		biallele	-1.9619	3.58877	1.39818	0.237029	1	0.030303	0.00546448	0.7	0.736842		expressed protein
LOC_Os12g32080	Locus-imprinted PEG	1		PEG	-4.98721	4.51354	20.4378	6.16019e-06	0.000267212	0	0	0.14554	0.167464		PEG	-9.82286	3.67628	78.8376	6.74321e-19	1.22223e-16	0	0	0	0		expressed protein
LOC_Os12g32150	Locus-imprinted PEG	1		PEG	-7.03913	7.2621	46.3775	9.75289e-12	9.84246e-10	0	0	0.0361991	0.0503505		PEG	-12.1185	7.2536	285.913	3.86382e-64	5.25247e-60	0	0	0	0.00040568		expressed protein
LOC_Os12g32170	Locus-imprinted PEG	1		PEG	-7.01476	5.2893	100.872	9.81126e-24	2.97041e-21	0	0	0.00742942	0.010395		PEG	-7.40831	7.04174	98.3226	3.55481e-23	9.47532e-21	0	0.00329598	0.0174419	0.00937766		expressed protein
LOC_Os12g32180	Locus-imprinted PEG	1		PEG	-5.84176	4.66174	75.7951	3.14686e-18	6.57517e-16	0	0.00980392	0.015674	0.0418605		PEG	-6.74811	3.94411	53.352	2.78829e-13	3.00826e-11	0.0319149	0	0.0149254	0		cornichon protein, putative, expressed
LOC_Os12g32250	Unclassified PEG	1		PEG	-6.91225	1.08416	14.5395	0.000137255	0.00465943	0	0	0	0		unknown	n.d.	n.d.	n.d.	n.d.	n.d.	n.d.	n.d.	n.d.	n.d.		WRKY96, expressed
LOC_Os12g34022	Unclassified MEG	1		MEG	6.23332	0.77995	9.07696	0.0025885	0.0272537	1	1	1	1		unknown	n.d.	n.d.	n.d.	n.d.	n.d.	n.d.	n.d.	n.d.	n.d.		retrotransposon%20protein%2C%20putative%2C%20unclassified%2C%20expressed
LOC_Os12g34490	Allelic imprinted MEG	1		biallele	6.9179	1.30511	9.57145	0.00197627	0.021447	1	1	NA	NA		MEG	6.61304	0.975481	10.6247	0.00111585	0.0160858	1	1	1	1		expressed protein
LOC_Os12g36950	Unclassified PEG	1		unknown	n.d.	n.d.	n.d.	n.d.	n.d.	n.d.	n.d.	n.d.	n.d.		PEG	-8.55006	3.63825	69.4123	7.98896e-17	1.16776e-14	0	0.00529101	0	0		CTP synthase, putative, expressed
LOC_Os12g37860	Locus-imprinted PEG	1		PEG	-4.46154	4.63735	48.2887	3.6787e-12	3.89811e-10	0.0202899	0.0147059	0.0731707	0.1		PEG	-5.45971	7.29814	119.124	9.83682e-28	3.6141e-25	0.0565079	0.015594	0.0147059	0.0140086		expressed protein
LOC_Os12g38580	Locus-imprinted PEG	1		PEG	-2.71054	2.56181	10.6062	0.00112707	0.030623	0.0909091	0.0757576	0.209302	0.191489		PEG	-4.99273	1.1513	11.096	0.000865122	0.0254764	0.0163934	0	0	0.0666667		hypothetical protein
LOC_Os12g38590	Locus-imprinted PEG	1		PEG	-4.16561	5.78965	14.6251	0.000131155	0.00449737	0.0209581	0	0.234043	0.222222		PEG	-6.0249	5.06671	56.8229	4.7689e-14	5.73703e-12	0.0188679	0.0641509	0.00465116	0		pumilio-family RNA binding repeat containing protein, expressed
LOC_Os12g39420	Locus-imprinted PEG	1		PEG	-5.30951	7.67256	46.6552	8.46424e-12	8.78091e-10	0.00174115	0.00935925	0.0870611	0.0880435		PEG	-5.4012	7.28852	125.235	4.52201e-29	1.98297e-26	0.00901984	0.0230769	0.0249471	0.0276713		nucleobase-ascorbate transporter, putative, expressed
LOC_Os12g40190	Allelic imprinted PEG	1		biallele	-1.28002	6.68432	14.6235	0.000131268	0.00449737	0.20339	0.244003	0.409674	0.328586		PEG	-1.46788	5.77684	12.3979	0.000429815	0.013432	0.187898	0.279188	0.271586	0.240473		G-protein alpha subunit, putative, expressed
LOC_Os12g40510	Locus-imprinted PEG	1		PEG	-4.87643	2.81992	18.8123	1.44232e-05	0.000582998	0	0	0.137931	0.0833333		PEG	-7.80131	2.97522	47.8914	4.50487e-12	4.3432e-10	0	0	0.0103093	0		calcineurin B, putative, expressed
LOC_Os12g40520	Locus-imprinted PEG	1		PEG	-5.8045	6.20831	32.7154	1.06687e-08	7.08973e-07	0	0.00232739	0.103448	0.0884808		PEG	-4.8621	6.21051	56.9582	4.45185e-14	5.40344e-12	0.00662252	0.0146341	0.080308	0.0632184		MATH domain containing protein, expressed
LOC_Os12g40790	Unclassified MEG	1		MEG	3.71624	7.57342	78.2757	8.96171e-19	1.01486e-16	0.938428	0.969167	0.876529	0.875524		unknown	n.d.	n.d.	n.d.	n.d.	n.d.	n.d.	n.d.	n.d.	n.d.		zinc finger family protein, putative, expressed
LOC_Os12g41140	Unclassified MEG	1		unknown	n.d.	n.d.	n.d.	n.d.	n.d.	n.d.	n.d.	n.d.	n.d.		MEG	3.39279	6.3096	36.8853	1.25285e-09	6.70522e-08	0.71831	0.869407	0.961783	0.92339		expressed protein
LOC_Os12g41956	Allelic imprinted PEG	0.225979		PEG	-2.33433	4.39996	18.2658	1.92129e-05	0.000760061	0.261649	0.26178	0.106061	0.0758621		biallele	-1.28319	3.95016	3.80359	0.0511427	0.775931	0.163636	0.486486	0.15625	0.224044		galactosyltransferase family protein, putative, expressed
LOC_Os12g42310	Allelic imprinted PEG	1		biallele	-4.40545	4.29502	10.3831	0.00127171	0.0340538	0	0	0.329193	0.258883		PEG	-6.84878	0.940617	15.2821	9.259e-05	0.00333864	0	0	0	0		serine/threonine-protein phosphatase BSL2, putative, expressed

## Sheet: 7 DAP endosperm
Supplementary Data 2. List of statistical values and maternal rates of imprinted genes in F1 endosperm and embryo.
Gene Name	Type of imprinting	Seed Coat Ratio		NIP-KAS combination											NIP-9311 combination											MSU annotation
				Imprinted	LR test by edgeR					Maternal rate (m / (m + 2p))					Imprinted	LR test by edgeR					Maternal rate (m / (m + 2p))
					logFC	lodCPM	LR	p value	FDR	NIP x KAS rep1	NIP x KAS rep2	KAS x NIP rep1	KAS x NIP rep2			logFC	lodCPM	LR	P value	FDR	NIP x 9311 rep1	NIP x 9311 rep2	9311 x NIP rep1	9311 x NIP rep2
LOC_Os01g02050	Locus-imprinted PEG	1		PEG	-5.036	3.78358	55.5445	9.13668e-14	7.01538e-12	0.0184049	0.0628019	0	0.0229885		PEG	-5.53489	5.22513	129.589	5.04001e-30	1.70869e-27	0.0101597	0.0246085	0.0164706	0.0288248		phosphoenolpyruvate carboxylase, putative, expressed
LOC_Os01g03144	Unclassified PEG	1		PEG	-5.14155	5.3772	72.0471	2.10122e-17	2.36139e-15	0.0528376	0.0391753	0	0.0221465		unknown	n.d.	n.d.	n.d.	n.d.	n.d.	n.d.	n.d.	n.d.	n.d.		white-brown complex homolog protein 7, putative, expressed
LOC_Os01g04350	Unclassified MEG	1		unknown	n.d.	n.d.	n.d.	n.d.	n.d.	n.d.	n.d.	n.d.	n.d.		MEG	6.415	0.788412	15.699	7.42645e-05	0.000958912	1	1	1	1		hsp20/alpha crystallin family protein, putative, expressed
LOC_Os01g05510	Allelic imprinted PEG	1		PEG	-4.84271	3.17449	46.1902	1.07313e-11	6.60001e-10	0.0285714	0.0175439	0.00869565	0.0555556		biallele	-2.38253	4.29184	11.938	0.00055	0.0145442	0.0548523	0.0440252	0.383607	0.318471		expressed protein
LOC_Os01g07740	Locus-imprinted PEG	1		PEG	-4.06031	6.68688	44.8376	2.14075e-11	1.30364e-09	0.114961	0.183752	0.0159011	0.016624		PEG	-3.40998	5.86981	56.7144	5.03943e-14	5.08637e-12	0.166667	0.1	0.0284168	0.0703125		DEAD-box ATP-dependent RNA helicase 14, putative, expressed
LOC_Os01g07920	Locus-imprinted PEG	0.232241		PEG	-4.8114	2.93779	39.2128	3.80038e-10	2.03378e-08	0.0265487	0	0.0769231	0.0454545		PEG	-4.06916	2.89102	30.357	3.59409e-08	1.90847e-06	0.0123457	0.030303	0.0909091	0.125		prolyl 4-hydroxylase, putative, expressed
LOC_Os01g07930	Locus-imprinted PEG	1		PEG	-4.5082	5.94373	72.5531	1.62598e-17	1.84407e-15	0.0396476	0.0579345	0.045614	0.011236		PEG	-3.60687	6.58468	61.5581	4.29875e-15	4.81679e-13	0.0852713	0.0968921	0.0692446	0.0367505		zinc finger C-x8-C-x5-C-x3-H type family protein, expressed
LOC_Os01g08330	Allelic imprinted MEG	1		MEG	8.25216	2.33054	29.4331	5.78816e-08	1.30572e-06	1	1	1	1		biallele	7.92555	1.98607	27.4046	1.65035e-07	3.80155e-06	1	1	1	NA		aspartic proteinase nepenthesin-1 precursor, putative, expressed
LOC_Os01g08570	Locus-imprinted PEG	1		PEG	-4.518	5.67506	74.2258	6.96737e-18	8.44417e-16	0.0366972	0.010101	0.038526	0.0757409		PEG	-3.64944	5.41396	71.6566	2.56106e-17	3.42044e-15	0.0875	0.126154	0.0356083	0.0549777		2-oxoglutarate and iron-dependent oxygenase domain-containing protein2, putative, expressed
LOC_Os01g10080	Locus-imprinted MEG	1		MEG	6.76171	6.83301	171.952	2.77195e-39	1.10538e-36	0.977477	0.979964	0.994983	0.997389		MEG	6.76832	7.24311	176.062	3.50922e-40	2.57772e-37	0.991751	0.98748	0.994278	0.984615		expressed protein
LOC_Os01g10520	Locus-imprinted MEG	1		MEG	5.87204	4.85572	54.2836	1.7354e-13	8.44608e-12	0.994236	0.916883	1	1		MEG	8.81885	4.54556	128.693	7.91466e-30	2.18016e-27	1	0.99	1	1		expressed protein
LOC_Os01g11130	Locus-imprinted PEG	0.231583		PEG	-5.32865	4.22024	77.5962	1.2641e-18	1.64493e-16	0.00425532	0.037037	0.0106383	0.0322581		PEG	-4.98832	4.76818	78.6624	7.36832e-19	1.08249e-16	0.0118577	0.045045	0.010989	0.0546875		RNA recognition motif containing protein, putative, expressed
LOC_Os01g12890	Locus-imprinted MEG	1		MEG	2.76057	5.30815	44.3901	2.69038e-11	9.75322e-10	0.853061	0.90795	0.80756	0.82516		MEG	3.55789	5.51653	66.3669	3.74333e-16	3.29962e-14	0.902098	0.94015	0.938224	0.864048		expressed protein
LOC_Os01g13180	Locus-imprinted MEG	1		MEG	5.92913	6.16125	104.442	1.61867e-24	2.35411e-22	0.964072	0.94964	0.990419	0.99803		MEG	9.16514	4.85468	140.528	2.04086e-32	7.93656e-30	1	1	0.994318	1		expressed protein
LOC_Os01g13250	Unclassified MEG	1		MEG	7.51105	1.75486	29.5547	5.43616e-08	1.2376e-06	1	1	1	1		unknown	n.d.	n.d.	n.d.	n.d.	n.d.	n.d.	n.d.	n.d.	n.d.		sarcoma antigen NY-SAR-91, putative, expressed
LOC_Os01g13360	Locus-imprinted PEG	1		PEG	-3.3862	11.1444	31.5057	1.98856e-08	9.0377e-07	0.141865	0.121766	0.0461507	0.0517798		PEG	-2.64302	11.0231	16.9547	3.82827e-05	0.00124367	0.171301	0.132744	0.108292	0.129253		phosphatidylinositol 3- and 4-kinase family protein, putative, expressed
LOC_Os01g13404	Locus-imprinted PEG	1		PEG	-5.47688	4.49145	47.9064	4.47064e-12	2.89351e-10	0.0790698	0.0548523	0	0.00358423		PEG	-3.0607	4.2839	33.6289	6.66939e-09	3.97219e-07	0.0714286	0.0645161	0.143885	0.137615		ATP binding protein, putative, expressed
LOC_Os01g13460	Locus-imprinted PEG	1		PEG	-4.07918	9.22793	81.5452	1.713e-19	2.37933e-17	0.044163	0.0453012	0.0581476	0.0622287		PEG	-5.01899	8.97357	57.4687	3.43393e-14	3.57507e-12	0.0657558	0.0517711	0.00969163	0.0181552		helix-loop-helix DNA-binding domain containing protein, expressed
LOC_Os01g13470	Allelic imprinted MEG	1		MEG	1.90785	6.65896	37.9301	7.33266e-10	2.2518e-08	0.764259	0.801223	0.742857	0.730634		biallele	1.5849	4.84784	9.07509	0.00259115	0.0225545	0.792531	0.909814	0.572581	0.484746		KH domain containing protein, putative, expressed
LOC_Os01g16810	Unclassified PEG	0.320864		unknown	n.d.	n.d.	n.d.	n.d.	n.d.	n.d.	n.d.	n.d.	n.d.		PEG	-4.62337	1.85895	30.0212	4.2735e-08	2.22458e-06	0.0416667	0.0909091	0	0.025641		MYB family transcription factor, putative, expressed
LOC_Os01g17250	Locus-imprinted PEG	0.24407		PEG	-5.57182	3.6453	75.3501	3.94219e-18	4.87334e-16	0.026087	0	0.0193548	0.0251256		PEG	-5.03683	4.28394	83.7821	5.52438e-20	9.0177e-18	0.0151515	0.0291262	0.0217391	0.0555556		BRASSINOSTEROID INSENSITIVE 1-associated receptor kinase 1 precursor, putative, expressed
LOC_Os01g17990	Locus-imprinted PEG	1		PEG	-5.14711	4.25858	55.4805	9.43908e-14	7.20284e-12	0.0163934	0	0.0147059	0.0785714		PEG	-4.28598	4.72491	59.5861	1.17057e-14	1.28977e-12	0.00977199	0.0672646	0.0390144	0.0680628		expressed protein
LOC_Os01g18810	Locus-imprinted MEG	1		MEG	5.64993	2.50638	31.4824	2.01255e-08	4.90712e-07	1	1	0.954023	1		MEG	8.42454	2.3634	50.5724	1.14847e-12	6.17281e-11	1	1	1	1		expressed protein
LOC_Os01g23620	Allelic imprinted PEG	1		PEG	-1.69142	3.72081	11.6501	0.000641989	0.0155309	0.222222	0.272727	0.142857	0.264		biallele	-1.34473	5.29419	12.3402	0.000443304	0.0118892	0.338636	0.336815	0.210019	0.214286		miro, putative, expressed
LOC_Os01g24710	Allelic imprinted MEG	1		MEG	4.27222	0.689886	9.96077	0.00159911	0.0149533	1	1	1	0.923077		biallele	2.85973	3.53679	13.025	0.000307358	0.00338094	0.695652	1	0.966527	0.883929		jacalin-like lectin domain containing protein, expressed
LOC_Os01g24880	Allelic imprinted MEG	1		MEG	2.48295	5.90836	49.0337	2.51601e-12	1.06883e-10	0.849155	0.801453	0.863454	0.790036		biallele	1.4269	7.84319	12.7939	0.000347747	0.00377416	0.686246	0.731393	0.671091	0.690211		zinc finger, C3HC4 type domain containing protein, expressed
LOC_Os01g27750	Locus-imprinted PEG	1		PEG	-3.37648	3.32637	22.4325	2.17654e-06	7.60068e-05	0.104895	0	0.0983607	0.136364		PEG	-3.8944	3.61409	24.1689	8.82445e-07	3.6923e-05	0.00662252	0.0625	0.137931	0.142857		bifunctional 3-dehydroquinate dehydratase/shikimate dehydrogenase,chloroplast precursor, putative, expressed
LOC_Os01g28300	Locus-imprinted MEG	1		MEG	8.01902	6.26341	233.303	1.13504e-52	1.40313e-49	0.996128	0.997963	0.987692	1		MEG	6.88205	6.65063	35.1658	3.02793e-09	9.62387e-08	0.899237	0.993205	1	1		OsFBX7 - F-box domain containing protein, expressed
LOC_Os01g32980	Unclassified PEG	1		unknown	n.d.	n.d.	n.d.	n.d.	n.d.	n.d.	n.d.	n.d.	n.d.		PEG	-3.13899	1.09892	10.7045	0.00106875	0.0264131	0.0545455	0	0.111111	0.285714		mitochondrial carrier protein, putative, expressed
LOC_Os01g33324	Unclassified MEG	0.235577		unknown	n.d.	n.d.	n.d.	n.d.	n.d.	n.d.	n.d.	n.d.	n.d.		MEG	5.92908	0.389021	13.1907	0.000281339	0.00312594	1	1	1	1		retrotransposon%20protein%2C%20putative%2C%20Ty1-copia%20subclass%2C%20expressed
LOC_Os01g33370	Unclassified MEG	1		unknown	n.d.	n.d.	n.d.	n.d.	n.d.	n.d.	n.d.	n.d.	n.d.		MEG	3.5615	2.21892	10.5931	0.00113512	0.0108209	0.900452	1	1	1		zinc-binding protein, putative, expressed
LOC_Os01g33650	Locus-imprinted PEG	1		PEG	-4.1911	2.92142	13.5806	0.000228538	0.00602384	0.181818	0	0	0.0357143		PEG	-4.65254	2.29312	33.8537	5.94166e-09	3.55478e-07	0	0.0545455	0.0571429	0.0204082		expressed protein
LOC_Os01g34400	Unclassified MEG	1		unknown	n.d.	n.d.	n.d.	n.d.	n.d.	n.d.	n.d.	n.d.	n.d.		MEG	7.1738	2.94263	50.1557	1.42015e-12	7.57144e-11	1	1	1	0.98		transposon%20protein%2C%20putative%2C%20Pong%20sub-class%2C%20expressed
LOC_Os01g34410	Unclassified MEG	1		unknown	n.d.	n.d.	n.d.	n.d.	n.d.	n.d.	n.d.	n.d.	n.d.		MEG	11.0735	4.88089	154.34	1.95204e-35	9.21781e-33	1	1	1	1		transposon%20protein%2C%20putative%2C%20Pong%20sub-class%2C%20expressed
LOC_Os01g34880	Unclassified PEG	0.229871		unknown	n.d.	n.d.	n.d.	n.d.	n.d.	n.d.	n.d.	n.d.	n.d.		PEG	-2.53034	3.31575	14.9286	0.000111659	0.00335536	0.142857	0.0285714	0.20339	0.285714		callose synthase, putative, expressed
LOC_Os01g34890	Unclassified PEG	0.165042		unknown	n.d.	n.d.	n.d.	n.d.	n.d.	n.d.	n.d.	n.d.	n.d.		PEG	-1.99185	6.54156	18.9126	1.36842e-05	0.000486379	0.162667	0.0785124	0.295282	0.295238		GLUCAN SYNTHASE-LIKE protein, putative, expressed
LOC_Os01g36840	Allelic imprinted PEG	1		PEG	-2.48867	6.48546	38.4126	5.72602e-10	3.025e-08	0.132976	0.0933908	0.108742	0.221884		biallele	-2.09796	6.00769	14.1595	0.000167949	0.00497897	0.0906801	0.0836013	0.289809	0.356601		ATP-binding region, ATPase-like domain containing protein, expressed
LOC_Os01g38650	Unclassified MEG	1		unknown	n.d.	n.d.	n.d.	n.d.	n.d.	n.d.	n.d.	n.d.	n.d.		MEG	10.6824	4.48418	117.421	2.32177e-27	4.95137e-25	1	1	1	1		expressed protein
LOC_Os01g40450	Locus-imprinted MEG	1		MEG	10.4688	6.26627	251.151	1.45689e-56	3.00169e-53	1	1	1	0.995526		MEG	9.30758	5.71061	128.387	9.2369e-30	2.49245e-27	0.995595	0.99779	1	1		2-aminoethanethiol dioxygenase, putative, expressed
LOC_Os01g40590	Locus-imprinted PEG	1		PEG	-3.58383	5.19512	72.6684	1.53373e-17	1.77196e-15	0.105058	0.073509	0.0746269	0.0419162		PEG	-2.48338	5.7466	32.572	1.14857e-08	6.6028e-07	0.0728745	0.206128	0.117857	0.164076		tyrosine protein kinase domain containing protein, putative, expressed
LOC_Os01g41370	Locus-imprinted PEG	1		PEG	-5.55826	7.43606	64.3565	1.03825e-15	1.01062e-13	0.0477569	0.0541401	0.00626305	0.00666667		PEG	-3.98113	8.36879	32.5115	1.18488e-08	6.78204e-07	0.0391374	0.145274	0.0291262	0.0267475		FBD domain containing protein, putative, expressed
LOC_Os01g41630	Locus-imprinted PEG	1		PEG	-2.68952	3.964	13.1072	0.000294168	0.00756029	0.159091	0	0.211765	0.204545		PEG	-2.0956	4.97957	28.9204	7.54129e-08	3.82034e-06	0.188209	0.118367	0.197761	0.221978		serine/threonine protein phosphatase 2A 55 kDa regulatory subunit B, putative, expressed
LOC_Os01g42270	Locus-imprinted MEG	1		MEG	9.71344	3.70407	94.7112	2.20289e-22	2.72321e-20	1	1	1	1		MEG	10.9546	4.73481	151.796	7.02149e-35	3.20131e-32	1	1	1	1		transcriptional corepressor LEUNIG, putative, expressed
LOC_Os01g46910	Unclassified MEG	1		unknown	n.d.	n.d.	n.d.	n.d.	n.d.	n.d.	n.d.	n.d.	n.d.		MEG	7.29813	1.37872	26.4661	2.68209e-07	5.97014e-06	1	1	1	1		microneme protein Sm70, putative, expressed
LOC_Os01g48580	Locus-imprinted MEG	1		MEG	7.68691	1.92366	32.1068	1.45926e-08	3.6151e-07	1	1	1	1		MEG	9.02386	2.89986	42.0492	8.90044e-11	3.53398e-09	1	1	1	1		ubiquitin-conjugating enzyme E2, putative, expressed
LOC_Os01g51754	Locus-imprinted PEG	1		PEG	-2.03002	6.53282	33.5675	6.88334e-09	3.27276e-07	0.216025	0.252082	0.136691	0.146919		PEG	-1.76418	6.65028	22.4396	2.16862e-06	8.6366e-05	0.242525	0.234192	0.193452	0.202518		alpha-amylase precursor, putative, expressed
LOC_Os01g54100	Locus-imprinted PEG	1		PEG	-3.88938	4.404	60.3992	7.74448e-15	6.74206e-13	0.0947368	0.0781671	0.0357143	0.0357143		PEG	-2.86407	4.11642	35.4216	2.65527e-09	1.61788e-07	0.142077	0.0898876	0.0819672	0.134884		CK1 CaseinKinase 1a.2 - CK1 includes the casein kinase 1 kinases, expressed
LOC_Os01g54784	Locus-imprinted PEG	1		PEG	-4.96645	4.00497	67.7806	1.82734e-16	1.93074e-14	0.0133333	0.0566038	0.0526316	0.0168067		PEG	-4.22005	4.49727	57.3933	3.56815e-14	3.68579e-12	0.0206186	0.0754717	0.0281124	0.0645161		expressed protein
LOC_Os01g55450	Unclassified PEG	1		unknown	n.d.	n.d.	n.d.	n.d.	n.d.	n.d.	n.d.	n.d.	n.d.		PEG	-4.26482	2.76236	34.3072	4.70626e-09	2.82846e-07	0.0521327	0.114754	0	0.04		CAMK KIN1/SNF1/Nim1 like.11 - CAMK includes calcium/calmodulin depedent protein kinases, expressed
LOC_Os01g55950	Allelic imprinted MEG	1		MEG	4.15165	2.42431	22.0511	2.6549e-06	4.45317e-05	0.777778	1	0.943662	0.957895		biallele	1.33784	0.982587	1.99729	0.15758	0.762917	0.870968	0.764706	1	0.263158		acetamidase, putative, expressed
LOC_Os01g56100	Locus-imprinted PEG	0.293899		PEG	-4.59916	3.30311	40.3474	2.1259e-10	1.17849e-08	0.0188679	0.0234742	0.111111	0.0107527		PEG	-4.61474	3.12979	38.1961	6.398e-10	4.16721e-08	0.0265487	0	0.0359712	0.105263		BSD domain containing protein, expressed
LOC_Os01g56110	Locus-imprinted PEG	1		PEG	-5.02906	3.11857	39.8823	2.69732e-10	1.46891e-08	0.0322581	0	0.00492611	0.0606061		PEG	-5.07288	3.94654	51.0523	8.99362e-13	7.98078e-11	0.0297619	0.010101	0.0372881	0.00775194		RNA recognition motif containing protein, putative, expressed
LOC_Os01g56580	Locus-imprinted PEG	1		PEG	-6.38113	7.38032	199.751	2.36648e-45	1.8284e-42	0.00873016	0.00595238	0.0168196	0.0159949		PEG	-5.02615	7.0404	85.0795	2.8661e-20	4.8584e-18	0.0130572	0.0189504	0.0348322	0.0576132		CK1 CaseinKinase 1a.3 - CK1 includes the casein kinase 1 kinases, expressed
LOC_Os01g56820	Allelic imprinted PEG	1		biallele	-2.30478	2.89783	12.6101	0.000383673	0.00965334	0.139535	0.0694444	0.333333	0.15625		PEG	-2.79935	1.73021	15.2189	9.57393e-05	0.00289672	0.118644	0.0344828	0.2	0.105263		AGAP000951-PA, putative, expressed
LOC_Os01g60360	Unclassified MEG	1		unknown	n.d.	n.d.	n.d.	n.d.	n.d.	n.d.	n.d.	n.d.	n.d.		MEG	8.65058	4.30446	69.4158	7.97467e-17	7.47809e-15	0.989848	1	1	1		ubiquitin-conjugating enzyme, putative, expressed
LOC_Os01g60750	Locus-imprinted MEG	1		MEG	6.81516	1.13581	19.9412	7.98615e-06	0.000122336	1	1	1	1		MEG	6.75187	0.981133	20.8039	5.08803e-06	8.46213e-05	1	1	1	1		transposon%20protein%2C%20putative%2C%20unclassified%2C%20expressed
LOC_Os01g61590	Locus-imprinted PEG	1		PEG	-7.15522	5.5649	157.694	3.6098e-36	1.48748e-33	0.00544465	0	0.00692042	0.0144404		PEG	-7.16244	5.68029	117.335	2.42497e-27	6.67979e-25	0.00314795	0	0.00518135	0.0248566		CAMK CAMK like.1 - CAMK includes calcium/calmodulin depedent protein kinases, expressed
LOC_Os01g62460	Locus-imprinted PEG	1		PEG	-3.0285	2.82834	15.4876	8.30466e-05	0.00231221	0.231884	0.0508475	0.0980392	0		PEG	-2.03213	3.4059	11.6739	0.000633815	0.0166607	0.219048	0.146341	0.0927835	0.234973		ZOS1-16 - C2H2 zinc finger protein, expressed
LOC_Os01g62790	Allelic imprinted PEG	1		PEG	-3.37877	4.22495	19.3412	1.09325e-05	0.000340421	0.235897	0.0105263	0.025641	0.0547945		biallele	-3.57142	1.903	9.09607	0.0025616	0.056828	0.457627	0.0625	0	0		expressed protein
LOC_Os01g63250	Locus-imprinted PEG	1		PEG	-2.88107	4.51932	29.2188	6.4648e-08	2.76533e-06	0.121662	0.280303	0.0594059	0.0576923		PEG	-3.27206	3.78559	27.4462	1.61524e-07	7.62741e-06	0.038961	0.0551181	0.0722892	0.21327		josephin, putative, expressed
LOC_Os01g64810	Locus-imprinted MEG	1		MEG	1.78498	6.10607	29.2507	6.35934e-08	1.42417e-06	0.704735	0.739264	0.800819	0.733788		MEG	2.03478	6.16003	36.139	1.83728e-09	6.013e-08	0.737855	0.826725	0.753394	0.795673		zinc finger DHHC domain-containing protein, putative, expressed
LOC_Os01g65850	Locus-imprinted PEG	1		PEG	-7.77445	6.06006	42.2984	7.83548e-11	4.54752e-09	0	0	0.0526316	0		PEG	-4.61575	5.43324	16.2408	5.57787e-05	0.00176437	0.0120846	0	0.298851	0.030303		CHD3-type chromatin-remodeling factor PICKLE, putative, expressed
LOC_Os01g65986	Allelic imprinted PEG	1		biallele	-1.79498	4.9182	15.9254	6.58876e-05	0.00187242	0.163158	0.116147	0.246537	0.364706		PEG	-1.67947	4.77326	15.9365	6.55022e-05	0.00203781	0.223602	0.274648	0.194093	0.214502		DUF803 domain containing, putative, expressed
LOC_Os01g67250	Locus-imprinted PEG	1		PEG	-3.42047	6.31775	58.8488	1.70267e-14	1.42219e-12	0.0504872	0.0383912	0.111433	0.153846		PEG	-2.91285	6.31241	64.6571	8.91331e-16	1.08121e-13	0.0959325	0.116688	0.116505	0.115789		Rad21 / Rec8 like protein, putative, expressed
LOC_Os01g67870	Locus-imprinted PEG	1		PEG	-3.31737	2.81111	25.7405	3.90553e-07	1.51824e-05	0.171717	0.0679612	0.0545455	0.0512821		PEG	-2.11878	2.88788	12.2152	0.000474027	0.0126874	0.15	0.0909091	0.272727	0.228571		expressed protein
LOC_Os01g68820	Locus-imprinted PEG	1		PEG	-8.78595	5.8346	212.475	3.96124e-48	3.76683e-45	0.00568182	0	0.00120627	0.00231481		PEG	-9.21731	5.74342	194.118	4.01417e-44	7.58219e-41	0.00131579	0	0.00303951	0		expressed protein
LOC_Os01g69850	Allelic imprinted PEG	0.264324		biallele	-1.6871	3.3873	1.51731	0.218027	1	0.0833333	0	0.655172	0.708738		PEG	-4.40713	3.44519	27.2838	1.75681e-07	8.23708e-06	0.0212766	0	0.0282486	0.191489		OsMADS65 - MADS-box family gene with MIKC* type-box, expressed
LOC_Os01g69910	Allelic imprinted PEG	1		PEG	-1.53619	4.66331	13.3724	0.00025536	0.00664581	0.291139	0.290323	0.178451	0.215777		biallele	-1.50498	4.72579	8.58704	0.00338565	0.0723183	0.458333	0.328358	0.127202	0.153465		calmodulin-binding transcription activator, putative, expressed
LOC_Os01g69930	Locus-imprinted PEG	1		PEG	-6.12649	3.41537	68.043	1.59971e-16	1.70479e-14	0.0179641	0	0.0153846	0.00740741		PEG	-4.98993	3.21944	25.2308	5.08625e-07	2.21948e-05	0.0534351	0.171429	0	0		dnaJ domain containing protein, expressed
LOC_Os01g69940	Locus-imprinted PEG	1		PEG	-7.05232	3.5294	73.9372	8.06414e-18	9.67854e-16	0	0	0	0.032967		PEG	-5.87839	3.36784	46.1449	1.09824e-11	8.6952e-10	0	0	0.0322581	0.0526316		OsFBX32 - F-box domain containing protein, expressed
LOC_Os01g73450	Unclassified PEG	1		unknown	n.d.	n.d.	n.d.	n.d.	n.d.	n.d.	n.d.	n.d.	n.d.		PEG	-7.22854	1.11414	31.4858	2.00907e-08	1.12559e-06	0	0	0	0		amino acid kinase, putative, expressed
LOC_Os02g03600	Allelic imprinted PEG	1		PEG	-1.26292	4.96944	11.3899	0.000738446	0.0176229	0.243129	0.296296	0.287273	0.293194		biallele	-0.166931	1.17506	0.0459345	0.830295	1	0.333333	0.5	0.428571	0.529412		dnaJ domain containing protein, expressed
LOC_Os02g04230	Unclassified MEG	1		MEG	3.74812	3.3191	28.5719	9.0285e-08	1.95808e-06	0.963855	0.810127	0.904762	1		unknown	n.d.	n.d.	n.d.	n.d.	n.d.	n.d.	n.d.	n.d.	n.d.		CGMC MAPKCMGC 2.7 - CGMC includes CDA, MAPK, GSK3, and CLKC kinases, expressed
LOC_Os02g04340	Unclassified MEG	1		MEG	3.45225	2.12656	14.7757	0.000121085	0.00145467	1	1	0.702128	0.888889		unknown	n.d.	n.d.	n.d.	n.d.	n.d.	n.d.	n.d.	n.d.	n.d.		NIN-like protein 2, putative, expressed
LOC_Os02g04450	Unclassified PEG	1		PEG	-4.79484	3.33232	57.9925	2.63122e-14	2.15411e-12	0.0206897	0.030303	0.031746	0.0458716		unknown	n.d.	n.d.	n.d.	n.d.	n.d.	n.d.	n.d.	n.d.	n.d.		plant-specific domain TIGR01589 family protein, putative, expressed
LOC_Os02g05630	Locus-imprinted PEG	1		PEG	-2.84452	3.3779	22.0415	2.66821e-06	9.23934e-05	0.0384615	0.113402	0.176471	0.138889		PEG	-2.89278	4.24938	28.7584	8.19939e-08	4.10653e-06	0.0488889	0.113043	0.108014	0.179487		protein phosphatase 2C, putative, expressed
LOC_Os02g06890	Unclassified PEG	1		PEG	-5.23414	4.39427	67.4573	2.15298e-16	2.25552e-14	0.023569	0	0.0305085	0.0514286		unknown	n.d.	n.d.	n.d.	n.d.	n.d.	n.d.	n.d.	n.d.	n.d.		OTU-like cysteine protease family protein, putative, expressed
LOC_Os02g07450	Unclassified PEG	1		PEG	-1.98554	3.34854	9.82394	0.00172255	0.0381615	0.0252101	0.280702	0.206612	0.260504		unknown	n.d.	n.d.	n.d.	n.d.	n.d.	n.d.	n.d.	n.d.	n.d.		core histone H2A/H2B/H3/H4, putative, expressed
LOC_Os02g07790	Locus-imprinted PEG	1		PEG	-5.07435	4.3418	57.806	2.8929e-14	2.35276e-12	0.0337079	0	0.0340136	0.0508475		PEG	-3.48164	5.14073	54.0546	1.94996e-13	1.86829e-11	0.0512821	0.0398406	0.0985075	0.160714		serine/threonine-protein kinase HT1, putative, expressed
LOC_Os02g07800	Locus-imprinted PEG	0.252162		PEG	-2.91588	1.71591	10.2644	0.00135619	0.0307055	0.127273	0	0.103448	0.217391		PEG	-2.02196	2.45259	11.0939	0.000866136	0.0218551	0.117647	0.155556	0.275362	0.223881		transcription factor, putative, expressed
LOC_Os02g08300	Locus-imprinted PEG	1		PEG	-3.24081	4.64703	33.5141	7.07484e-09	3.35093e-07	0.242718	0.105263	0.0501319	0.0363636		PEG	-4.17538	5.13518	66.6205	3.29152e-16	4.1057e-14	0.0598291	0.112462	0.0178571	0.0350195		RAD23 DNA repair protein, putative, expressed
LOC_Os02g09580	Unclassified MEG	1		unknown	n.d.	n.d.	n.d.	n.d.	n.d.	n.d.	n.d.	n.d.	n.d.		MEG	6.51339	0.831137	19.0435	1.27772e-05	0.000195307	1	1	1	1		OsFBX39 - F-box domain containing protein, expressed
LOC_Os02g09650	Locus-imprinted PEG	0.296715		PEG	-4.61938	2.29604	21.4176	3.69362e-06	0.000123407	0.0769231	0.142857	0	0		PEG	-5.15711	3.1134	49.9281	1.59483e-12	1.40579e-10	0.0149254	0.030303	0.0169492	0.0306122		AP2 domain containing protein, expressed
LOC_Os02g09770	Locus-imprinted PEG	1		PEG	-4.52425	1.42766	19.69	9.10781e-06	0.000288694	0.025641	0	0.0625	0.037037		PEG	-5.13319	1.68579	26.3121	2.9047e-07	1.31078e-05	0	0	0	0.0833333		abhydrolase domain-containing protein FAM108C1, putative, expressed
LOC_Os02g10650	Unclassified PEG	1		unknown	n.d.	n.d.	n.d.	n.d.	n.d.	n.d.	n.d.	n.d.	n.d.		PEG	-3.81496	5.11841	90.9442	1.47779e-21	2.71379e-19	0.0754717	0.0601719	0.055814	0.0601093		CRAL/TRIO domain containing protein, expressed
LOC_Os02g12840	Allelic imprinted PEG	1		PEG	-2.33678	4.47279	25.0317	5.6394e-07	2.13861e-05	0.2	0.105991	0.12	0.170068		biallele	-1.62941	5.62283	8.44344	0.00366363	0.077381	0.092511	0.113043	0.417344	0.462366		DEAD-box ATP-dependent RNA helicase, putative, expressed
LOC_Os02g12870	Allelic imprinted PEG	1		biallele	-3.44453	2.07013	10.8501	0.000987927	0.0227426	0.103448	0.481481	0.0181818	0		PEG	-3.20883	3.53732	29.1108	6.83558e-08	3.47615e-06	0.0411985	0.0909091	0.0701754	0.2		expressed protein
LOC_Os02g14720	Locus-imprinted MEG	1		MEG	4.56588	5.28376	68.9628	1.00341e-16	7.25387e-15	0.929032	0.889968	0.975309	0.982394		MEG	5.06965	6.73317	128.131	1.05058e-29	2.77816e-27	0.949765	0.956567	0.978648	0.974105		expressed protein
LOC_Os02g17190	Locus-imprinted PEG	0.189999		PEG	-5.71501	1.75508	29.8565	4.65232e-08	2.02507e-06	0	0.0196078	0	0.027027		PEG	-5.41008	1.58112	33.4868	7.17485e-09	4.21626e-07	0.0357143	0.0344828	0	0		MYB family transcription factor, putative, expressed
LOC_Os02g17910	Locus-imprinted PEG	1		PEG	-6.97151	2.92169	64.7203	8.63214e-16	8.60569e-14	0.00869565	0	0.0140845	0		PEG	-6.52931	4.46703	96.6074	8.45302e-23	1.64362e-20	0.0025974	0	0.0126582	0.027972		CK1 CaseinKinase 1.4 - CK1 includes the casein kinase 1 kinases, expressed
LOC_Os02g20394	Unclassified PEG	1		PEG	-2.9978	1.5088	9.86623	0.0016834	0.0374958	0.135135	0	0.142857	0.0769231		unknown	n.d.	n.d.	n.d.	n.d.	n.d.	n.d.	n.d.	n.d.	n.d.		dnaJ domain containing protein, expressed
LOC_Os02g21430	Locus-imprinted PEG	1		PEG	-6.71681	5.64712	101.334	7.77255e-24	1.47822e-21	0.00732984	0	0.037037	0.00831025		PEG	-5.33218	6.11886	108.948	1.66578e-25	3.7974e-23	0.0168067	0.00871731	0.0216802	0.0560748		AML1, putative, expressed
LOC_Os02g21460	Locus-imprinted PEG	0.0679382		PEG	-3.97249	1.47738	16.7701	4.2193e-05	0.00122439	0.111111	0.0810811	0.030303	0		PEG	-2.84216	2.85701	17.6497	2.65558e-05	0.000886668	0.203704	0.12	0.078125	0.0625		uncharacterized protein yqjG, putative, expressed
LOC_Os02g28580	Locus-imprinted MEG	1		MEG	8.9555	5.96361	212.075	4.84251e-48	3.52136e-45	0.993976	1	1	1		MEG	7.11238	6.17232	197.545	7.17267e-45	1.35481e-41	0.993249	0.986159	0.9941	0.994083		expressed protein
LOC_Os02g28660	Locus-imprinted MEG	1		MEG	8.90734	2.8978	59.1545	1.45766e-14	8.19072e-13	1	1	1	1		MEG	10.1052	3.91303	108.44	2.15239e-25	3.95262e-23	1	1	1	1		expressed protein
LOC_Os02g29040	Allelic imprinted PEG	1		PEG	-4.92744	3.54372	40.2183	2.27115e-10	1.24782e-08	0.0787879	0	0.0169492	0.0108696		biallele	-2.81513	1.85041	0.879379	0.348372	1	1	NA	0	0		ankyrin repeat domain containing protein, putative, expressed
LOC_Os02g29110	Locus-imprinted PEG	1		PEG	-3.54676	1.34651	11.656	0.000639959	0.0155121	0	0	0.142857	0.128205		PEG	-4.24618	1.80857	24.5053	7.41076e-07	3.15065e-05	0	0	0.0555556	0.115385		ankyrin repeat family protein, putative, expressed
LOC_Os02g29130	Unclassified PEG	1		unknown	n.d.	n.d.	n.d.	n.d.	n.d.	n.d.	n.d.	n.d.	n.d.		PEG	-5.38396	1.30535	25.3865	4.69197e-07	2.05421e-05	0	0.125	0	0		ankyrin, putative, expressed
LOC_Os02g29140	Locus-imprinted PEG	1		PEG	-7.17192	7.6727	36.6146	1.43952e-09	7.35346e-08	0.000600962	0	0.0387435	0.0496614		PEG	-5.18341	6.3574	22.1356	2.54058e-06	0.000100273	0.0035524	0.00115607	0.198511	0.128238		ankyrin, putative, expressed
LOC_Os02g29230	Locus-imprinted MEG	1		MEG	8.49733	6.08062	212.267	4.39742e-48	3.39755e-45	0.993355	1	1	0.994971		MEG	8.82793	6.18501	210.82	9.10037e-48	2.4065e-44	0.998969	0.996528	0.996683	0.996764		expressed protein
LOC_Os02g31970	Unclassified MEG	1		unknown	n.d.	n.d.	n.d.	n.d.	n.d.	n.d.	n.d.	n.d.	n.d.		MEG	3.56512	2.32671	23.4863	1.25808e-06	2.40033e-05	0.918919	1	0.833333	0.897436		retrotransposon%20protein%2C%20putative%2C%20unclassified%2C%20expressed
LOC_Os02g32210	Allelic imprinted MEG	1		biallele	6.09695	0.784663	7.98596	0.00471416	0.0390855	1	1	NA	NA		MEG	8.59723	2.5492	37.6741	8.3609e-10	2.94794e-08	1	1	1	1		expressed protein
LOC_Os02g33700	Unclassified MEG	1		unknown	n.d.	n.d.	n.d.	n.d.	n.d.	n.d.	n.d.	n.d.	n.d.		MEG	5.38405	0.0594682	10.2934	0.0013351	0.0125374	1	1	1	1		expressed protein
LOC_Os02g34360	Locus-imprinted PEG	1		PEG	-6.46732	4.83987	102.161	5.11833e-24	1.00433e-21	0	0	0.00985222	0.0127551		PEG	-4.82648	3.24355	44.8223	2.15749e-11	1.67802e-09	0.0566038	0.0120482	0.0466321	0.0198675		expressed protein
LOC_Os02g34370	Locus-imprinted PEG	1		PEG	-5.96975	5.81536	78.1523	9.53958e-19	1.26805e-16	0	0.00759494	0.0271903	0.0396825		PEG	-5.84411	5.35509	87.1993	9.81195e-21	1.72978e-18	0.0523256	0.0290456	0.00813008	0.00301205		expressed protein
LOC_Os02g34500	Allelic imprinted PEG	1		biallele	-1.87717	2.56576	9.19658	0.00242467	0.0516972	0.186813	0.311475	0.219512	0.135802		PEG	-1.79581	3.07365	9.69997	0.00184271	0.0429706	0.209302	0.15942	0.156627	0.296		expressed protein
LOC_Os02g34850	Locus-imprinted PEG	1		PEG	-2.28308	7.7279	36.0706	1.90301e-09	9.64141e-08	0.2	0.209502	0.130045	0.118028		PEG	-2.0838	7.37306	26.0251	3.37001e-07	1.50535e-05	0.186971	0.20114	0.158785	0.178828		histone-lysine N-methyltransferase ASHH2, putative, expressed
LOC_Os02g34990	Allelic imprinted MEG	1		biallele	1.67424	6.46402	31.2012	2.32625e-08	5.59477e-07	0.693793	0.747266	0.752597	0.71912		MEG	2.61168	6.38041	45.7418	1.34911e-11	6.04676e-10	0.897738	0.804035	0.828089	0.836991		ACT domain containing protein, putative, expressed
LOC_Os02g35130	Allelic imprinted PEG	1		biallele	-1.19894	4.15427	1.80343	0.179298	1	0.605634	0.734375	0.0451128	0.106383		PEG	-1.46932	4.51243	11.2541	0.000794469	0.0202009	0.280277	0.2	0.248848	0.263682		AIG1, putative, expressed
LOC_Os02g36360	Locus-imprinted PEG	0.273407		PEG	-6.6597	5.85829	189.286	4.55256e-43	2.96204e-40	0.00974659	0.00729927	0.0104167	0.00869565		PEG	-5.78712	5.57751	118.92	1.09051e-27	3.06782e-25	0.0413793	0.0150376	0.00463392	0.0191657		ZOS2-11 - C2H2 zinc finger protein, expressed
LOC_Os02g36550	Allelic imprinted MEG	0.21246		biallele	2.0907	-0.300199	1.59641	0.206412	0.831178	1	1	0.777778	NA		MEG	6.04792	0.552831	12.4418	0.000419826	0.00447657	1	1	1	1		phosphopantothenate--cysteine ligase, putative, expressed
LOC_Os02g36680	Locus-imprinted PEG	1		PEG	-4.76203	10.1402	71.457	2.83374e-17	3.15592e-15	0.0302844	0.0302844	0.0453513	0.0249719		PEG	-4.5181	4.67776	49.5908	1.89402e-12	1.62615e-10	0.11875	0.0574713	0.00834725	0.0285714		expressed protein
LOC_Os02g36710	Allelic imprinted PEG	1		PEG	-1.57867	6.71428	17.2361	3.30103e-05	0.000969296	0.261714	0.181641	0.272254	0.219844		biallele	-0.906813	7.43998	5.29701	0.0213621	0.370183	0.412054	0.324132	0.303488	0.301749		SET, putative, expressed
LOC_Os02g37440	Locus-imprinted PEG	1		PEG	-2.00367	6.01607	32.8904	9.75052e-09	4.54853e-07	0.147939	0.238027	0.207792	0.152174		PEG	-1.72493	5.39709	15.5277	8.13054e-05	0.00248272	0.243968	0.20396	0.26009	0.210332		expressed protein
LOC_Os02g38080	Unclassified MEG	1		MEG	3.98716	5.47846	68.7138	1.13844e-16	8.13493e-15	0.94702	0.942478	0.941606	0.889535		unknown	n.d.	n.d.	n.d.	n.d.	n.d.	n.d.	n.d.	n.d.	n.d.		protein kinase domain containing protein, expressed
LOC_Os02g39920	Locus-imprinted PEG	1		PEG	-6.13982	3.60871	76.8091	1.88307e-18	2.42484e-16	0.0116279	0	0.0327869	0.00578035		PEG	-6.5806	6.92091	163.116	2.3593e-37	1.55974e-34	0.0076199	0.00610169	0.0107373	0.0160727		AT hook motif family protein, expressed
LOC_Os02g41610	Locus-imprinted PEG	1		PEG	-3.18485	3.27634	33.3817	7.57336e-09	3.55977e-07	0.124088	0.0923077	0.0515464	0.1		PEG	-2.73566	7.54272	26.1556	3.1499e-07	1.41179e-05	0.0462487	0.197368	0.0965732	0.131263		expressed protein
LOC_Os02g41630	Unclassified PEG	1		unknown	n.d.	n.d.	n.d.	n.d.	n.d.	n.d.	n.d.	n.d.	n.d.		PEG	-2.31211	6.55458	36.4354	1.57813e-09	9.93621e-08	0.171861	0.115178	0.162722	0.202623		phenylalanine ammonia-lyase, putative, expressed
LOC_Os02g43460	Locus-imprinted MEG	1		MEG	3.19063	3.76016	24.4372	7.67701e-07	1.43358e-05	0.864198	1	0.774436	0.931818		MEG	3.61621	3.79578	48.1443	3.95969e-12	1.92482e-10	0.903448	0.923664	0.937984	0.898305		required to maintain repression 1, putative, expressed
LOC_Os02g45344	Allelic imprinted PEG	1		PEG	-2.358	2.65372	12.0223	0.000525686	0.0128684	0.12	0.135135	0.0909091	0.287671		biallele	-1.81115	4.10802	10.8535	0.000986103	0.0244162	0.139896	0.132743	0.21374	0.44385		O-acyltransferase, putative, expressed
LOC_Os02g47950	Unclassified PEG	1		unknown	n.d.	n.d.	n.d.	n.d.	n.d.	n.d.	n.d.	n.d.	n.d.		PEG	-2.50885	5.82179	30.9666	2.62508e-08	1.43425e-06	0.178841	0.0784314	0.146099	0.187761		expressed protein
LOC_Os02g49150	Locus-imprinted PEG	1		PEG	-2.60473	3.86503	11.0579	0.000883079	0.0206363	0.112195	0	0.3	0.222222		PEG	-1.79988	3.87833	12.8867	0.00033093	0.00905911	0.287599	0.155556	0.154362	0.226667		RNA polymerase Rpb4, putative, expressed
LOC_Os02g50860	Allelic imprinted PEG	1		PEG	-4.0381	3.65843	26.7933	2.26423e-07	9.23778e-06	0.0212766	0.00483092	0.180952	0.111111		biallele	-2.56592	4.83044	19.8791	8.24978e-06	0.000305542	0.0404313	0.0815451	0.191874	0.334812		ras-related protein, putative, expressed
LOC_Os02g51540	Locus-imprinted PEG	1		PEG	-6.56354	5.08445	109.896	1.03252e-25	2.27928e-23	0.0352941	0	0.00462963	0.0046225		PEG	-5.91451	4.82838	124.947	5.22718e-29	1.6073e-26	0.0133333	0.0231023	0.00740741	0.0158014		eukaryotic aspartyl protease domain containing protein, expressed
LOC_Os02g51550	Locus-imprinted PEG	1		PEG	-2.54058	3.42303	20.7818	5.14685e-06	0.000167877	0.0819672	0.121951	0.147059	0.223529		PEG	-2.72808	5.60181	26.5987	2.50409e-07	1.14962e-05	0.112866	0.253012	0.121294	0.0996016		DUF581 domain containing protein, expressed
LOC_Os02g51850	Locus-imprinted PEG	1		PEG	-2.9468	3.50115	21.4721	3.59018e-06	0.000120603	0.240876	0.165354	0.0280374	0.0595238		PEG	-2.17693	4.05422	18.9328	1.35404e-05	0.000482564	0.298805	0.207729	0.0939227	0.133929		OsAPRL3 adenosine 5'-phosphosulfate reductase-like OsAPRL3, expressed
LOC_Os02g51860	Locus-imprinted PEG	0.113473		PEG	-6.31793	3.06896	61.7821	3.8365e-15	3.53932e-13	0.0153846	0	0.00813008	0.0232558		PEG	-4.11369	2.83841	39.3365	3.56711e-10	2.40634e-08	0.0307692	0.0566038	0.0425532	0.0754717		dehydration response related protein, putative, expressed
LOC_Os02g52920	Allelic imprinted PEG	1		PEG	-1.77737	3.55555	13.0801	0.000298447	0.00765437	0.288889	0.179104	0.221477	0.153846		biallele	-1.49584	3.50493	9.00437	0.00269335	0.0591552	0.232323	0.229508	0.257732	0.287129		emp24/gp25L/p24 family protein, putative, expressed
LOC_Os02g52960	Locus-imprinted PEG	1		PEG	-2.32477	8.76619	23.5237	1.23387e-06	4.4084e-05	0.102993	0.0853147	0.22764	0.266884		PEG	-2.6715	8.26309	28.2858	1.0466e-07	5.08754e-06	0.0885552	0.0809249	0.174839	0.208466		PHD-finger domain containing protein, putative, expressed
LOC_Os02g56530	Locus-imprinted PEG	1		PEG	-4.00939	2.38236	24.4045	7.80871e-07	2.83915e-05	0.0689655	0	0.0810811	0.075		PEG	-4.95218	1.88263	28.5476	9.14243e-08	4.51049e-06	0	0	0.0181818	0.0877193		ankyrin repeat domain containing protein, expressed
LOC_Os02g57080	Locus-imprinted PEG	1		PEG	-6.0392	4.91104	22.846	1.75512e-06	6.18141e-05	0	0	0.046729	0.147059		PEG	-5.48964	3.4335	39.6997	2.96177e-10	2.01858e-08	0	0.0217391	0	0.0595238		serine/threonine-protein kinase, putative, expressed
LOC_Os02g57190	Locus-imprinted PEG	1		PEG	-3.88559	5.21355	61.2738	4.96654e-15	4.48149e-13	0.0853659	0.0425532	0.0593607	0.0410959		PEG	-2.82827	5.901	29.3045	6.18515e-08	3.16977e-06	0.0511296	0.0613027	0.175066	0.25446		Myosin head domain containing protein, expressed
LOC_Os02g57200	Allelic imprinted PEG	1		PEG	-5.45589	6.28616	106.967	4.5255e-25	9.32404e-23	0.0204082	0.00362976	0.0240964	0.039312		biallele	-2.00085	7.21616	4.4489	0.0349237	0.547596	0.0348432	0.0466139	0.562151	0.551409		expressed protein
LOC_Os02g57820	Unclassified PEG	1		unknown	n.d.	n.d.	n.d.	n.d.	n.d.	n.d.	n.d.	n.d.	n.d.		PEG	-3.78319	1.97052	21.9861	2.74626e-06	0.000107429	0.0377358	0.0666667	0	0.176471		AT hook motif domain containing protein, expressed
LOC_Os03g02180	Locus-imprinted PEG	0.0499479		PEG	-2.34979	6.42998	48.7302	2.93715e-12	1.9841e-10	0.174367	0.173554	0.142045	0.129157		PEG	-2.63087	7.26996	30.9566	2.63862e-08	1.43571e-06	0.170787	0.173869	0.1	0.10136		cytochrome P450, putative, expressed
LOC_Os03g03070	Unclassified PEG	1		unknown	n.d.	n.d.	n.d.	n.d.	n.d.	n.d.	n.d.	n.d.	n.d.		PEG	-7.52399	1.37267	37.5876	8.73964e-10	5.66449e-08	0	0	0	0		transcription factor, putative, expressed
LOC_Os03g05180	Unclassified PEG	1		PEG	-7.45977	1.46303	29.8684	4.62377e-08	2.01975e-06	0	0	0	0		unknown	n.d.	n.d.	n.d.	n.d.	n.d.	n.d.	n.d.	n.d.	n.d.		expressed protein
LOC_Os03g05480	Locus-imprinted PEG	1		PEG	-2.81726	4.07897	36.33	1.66579e-09	8.47427e-08	0.0916335	0.111111	0.117647	0.142857		PEG	-2.30551	4.03579	21.0742	4.41842e-06	0.000170322	0.118182	0.186603	0.133929	0.191489		ZOS3-01 - C2H2 zinc finger protein, expressed
LOC_Os03g07130	Allelic imprinted PEG	1		PEG	-2.10781	3.25367	11.6806	0.000631542	0.0153382	0.129412	0.229167	0.107692	0.182609		biallele	-1.84683	4.17459	15.0432	0.000105075	0.00316471	0.310881	0.242236	0.141732	0.153846		RING finger protein 13, putative, expressed
LOC_Os03g11550	Locus-imprinted PEG	0.0915289		PEG	-2.41593	2.73561	12.6075	0.000384197	0.00965334	0.133333	0.0578512	0.291667	0.204819		PEG	-1.91709	3.33048	12.0168	0.000527235	0.0139982	0.236364	0.142857	0.15625	0.232323		protein of unknown function DUF1675 domain containing protein, expressed
LOC_Os03g14280	Allelic imprinted PEG	1		PEG	-4.99689	3.39718	51.7568	6.28204e-13	4.59519e-11	0	0.0277778	0.0294118	0.0666667		biallele	-1.83559	3.3113	4.3059	0.0379803	0.586654	0.152318	0	0.379747	0.527273		ATP-dependent Clp protease ATP-binding subunit, putative, expressed
LOC_Os03g14290	Allelic imprinted PEG	1		PEG	-5.05681	2.21009	25.0139	5.69198e-07	2.15181e-05	0	0	0.0243902	0.111111		biallele	-2.5511	2.40967	10.1536	0.00144023	0.0346863	0.0416667	0.027027	0.378378	0.230769		expressed protein
LOC_Os03g15010	Locus-imprinted PEG	1		PEG	-1.62206	4.43344	13.7397	0.000209965	0.00555801	0.164983	0.216438	0.298701	0.257384		PEG	-1.62959	5.24399	19.8605	8.3306e-06	0.000307674	0.250804	0.169054	0.277883	0.236994		transposon%20protein%2C%20putative%2C%20unclassified%2C%20expressed
LOC_Os03g15990	Locus-imprinted MEG	1		MEG	7.95027	2.07675	37.6203	8.5944e-10	2.59765e-08	1	1	1	1		MEG	8.32672	2.26015	47.4288	5.70376e-12	2.6934e-10	1	1	1	1		EDM2, putative, expressed
LOC_Os03g16570	Allelic imprinted PEG	1		PEG	-2.74504	2.09378	12.837	0.000339834	0.00866191	0.227273	0.0576923	0.2	0.105263		biallele	-1.26269	2.2218	3.85764	0.04952	0.707842	0.277778	0.333333	0.32	0.239437		zinc finger, C3HC4 type domain containing protein, expressed
LOC_Os03g16760	Locus-imprinted MEG	1		MEG	6.65653	2.72857	43.0366	5.37263e-11	1.87089e-09	1	1	0.904762	1		MEG	5.67501	3.37284	34.517	4.22551e-09	1.28732e-07	0.955272	1	1	1		protein phosphatase 2C, putative, expressed
LOC_Os03g18080	Locus-imprinted PEG	1		PEG	-4.24492	5.83644	46.3543	9.86905e-12	6.10006e-10	0.0311111	0.00468019	0.10365	0.101987		PEG	-2.94953	6.33876	33.059	8.94064e-09	5.23067e-07	0.0420969	0.0707547	0.21725	0.158333		SacI homology domain containing protein, expressed
LOC_Os03g19920	Locus-imprinted PEG	1		PEG	-4.28152	2.98448	33.9086	5.77614e-09	2.77839e-07	0.047619	0	0.111111	0.031746		PEG	-6.57965	3.84844	82.6699	9.69664e-20	1.5263e-17	0	0	0.0180505	0.0146341		expressed protein
LOC_Os03g20430	Locus-imprinted MEG	1		MEG	7.51118	1.73367	27.0239	2.00956e-07	4.17515e-06	1	1	1	1		MEG	8.67533	2.57574	52.7605	3.76797e-13	2.21422e-11	1	1	1	1		histone-lysine N-methyltransferase, H3 lysine-9 specific SUVH8, putative, expressed
LOC_Os03g21870	Unclassified MEG	1		unknown	n.d.	n.d.	n.d.	n.d.	n.d.	n.d.	n.d.	n.d.	n.d.		MEG	5.38694	2.51641	35.1533	3.04742e-09	9.66259e-08	1	1	1	0.87234		DUF623 domain containing protein, expressed
LOC_Os03g22470	Allelic imprinted MEG	0.151383		MEG	5.69649	1.95741	20.1823	7.04026e-06	0.00010954	1	1	0.994962	1		biallele	3.45499	0.347437	5.25505	0.0218832	0.147321	0.846154	1	1	1		desiccation-related protein PCC13-62 precursor, putative, expressed
LOC_Os03g24900	Locus-imprinted PEG	1		PEG	-6.95024	4.42515	100.505	1.18074e-23	2.21157e-21	0.0134228	0	0	0.0206897		PEG	-7.10108	4.17139	115.019	7.79303e-27	1.94414e-24	0.00350877	0.00628931	0.003367	0.0131004		DHHC zinc finger domain containing protein, expressed
LOC_Os03g25070	Locus-imprinted PEG	1		PEG	-5.86092	4.05015	79.9069	3.92464e-19	5.33147e-17	0.024911	0	0.00970874	0.025		PEG	-6.88807	6.17685	134.537	4.16831e-31	1.57467e-28	0.000877963	0.00576701	0.018226	0.0107108		CAMK CAMK like.18 - CAMK includes calcium/calmodulin depedent protein kinases, expressed
LOC_Os03g27450	Locus-imprinted PEG	1		PEG	-6.02385	5.05421	124.155	7.79129e-29	2.00658e-26	0.020979	0.0152905	0.0151188	0.00262467		PEG	-5.80913	5.34594	80.585	2.78462e-19	4.23198e-17	0.0013947	0.0177778	0.00875657	0.0486726		ADP-ribosylation factor, putative, expressed
LOC_Os03g27460	Locus-imprinted PEG	1		PEG	-4.89845	5.19108	22.028	2.68703e-06	9.27671e-05	0.00476948	0	0.140351	0.162667		PEG	-4.28805	5.37065	73.2133	1.16368e-17	1.57002e-15	0.0196078	0.0517241	0.0390625	0.0750605		heat shock protein DnaJ, putative, expressed
LOC_Os03g27820	Allelic imprinted PEG	1		PEG	-1.75043	6.33969	24.7905	6.39122e-07	2.38696e-05	0.172414	0.179487	0.249545	0.270244		biallele	-1.23771	7.24004	10.2446	0.00137088	0.0332583	0.323176	0.220195	0.320925	0.291429		expressed protein
LOC_Os03g29470	Locus-imprinted PEG	1		PEG	-3.0133	5.87212	41.6127	1.11267e-10	6.36137e-09	0.24165	0.119718	0.0355221	0.085639		PEG	-2.8769	4.48474	26.4172	2.75076e-07	1.2585e-05	0.0358974	0.0994152	0.149321	0.192308		transcription initiation factor IID, putative, expressed
LOC_Os03g31070	Unclassified PEG	1		unknown	n.d.	n.d.	n.d.	n.d.	n.d.	n.d.	n.d.	n.d.	n.d.		PEG	-3.07098	1.65561	10.9909	0.000915607	0.022885	0.225806	0	0	0.0985915		protein kinase, putative, expressed
LOC_Os03g31944	Allelic imprinted MEG	1		biallele	9.63801	3.55632	52.3281	4.69602e-13	2.16613e-11	1	1	NA	NA		MEG	11.0798	4.8736	163.872	1.61308e-37	8.88673e-35	1	1	1	1		expressed protein
LOC_Os03g33590	Locus-imprinted PEG	1		PEG	-3.55757	2.17669	19.685	9.13163e-06	0.000288709	0.138462	0.027027	0.05	0.0461538		PEG	-2.69197	1.95244	11.5903	0.000662957	0.0173034	0.142857	0.179487	0.166667	0		interferon-related developmental regulator, putative, expressed
LOC_Os03g36790	Locus-imprinted PEG	1		PEG	-3.97849	2.33476	19.9531	7.93642e-06	0.000255495	0.0149254	0	0.0933333	0.173913		PEG	-5.52953	3.72971	58.5749	1.95696e-14	2.08669e-12	0	0.0188679	0.0240964	0.0535714		tobamovirus multiplication protein, putative, expressed
LOC_Os03g37270	Allelic imprinted PEG	1		biallele	-1.18406	4.03483	3.74837	0.0528591	0.727503	0.204819	0.106796	0.452769	0.417219		PEG	-1.79681	5.03978	15.337	8.99388e-05	0.00272746	0.236321	0.131148	0.296089	0.145299		RNA recognition motif containing protein, putative, expressed
LOC_Os03g38970	Locus-imprinted PEG	0.162456		PEG	-5.64724	5.13924	123.344	1.17265e-28	2.95842e-26	0.0146628	0.0220713	0.0134048	0.0188679		PEG	-4.64289	7.02702	70.5885	4.40081e-17	5.76114e-15	0.0149254	0.0318792	0.0283067	0.0830705		metal ion binding protein, putative, expressed
LOC_Os03g40930	Locus-imprinted PEG	1		PEG	-2.40696	7.39928	51.2681	8.05752e-13	5.82497e-11	0.183312	0.179712	0.13366	0.110236		PEG	-2.42651	7.83023	29.1665	6.64172e-08	3.39061e-06	0.229647	0.175385	0.106212	0.117565		expressed protein
LOC_Os03g42050	Allelic imprinted PEG	1		biallele	-1.54543	5.46398	17.5348	2.82094e-05	0.000836269	0.318471	0.246324	0.198044	0.203604		PEG	-1.80639	5.1207	23.3118	1.37749e-06	5.63875e-05	0.230769	0.229091	0.164179	0.231481		exportin-7-A, putative, expressed
LOC_Os03g43580	Allelic imprinted PEG	1		PEG	-2.66936	2.03215	13.2598	0.00027116	0.00701271	0.162162	0.0909091	0.133333	0.1		biallele	-3.30906	0.632815	5.78038	0.016206	0.291929	0	0	0	0.2		IQ calmodulin-binding motif family protein, putative, expressed
LOC_Os03g43590	Allelic imprinted PEG	0.0720894		biallele	-1.85535	5.5301	14.1271	0.000170861	0.00456196	0.0875576	0.137112	0.271654	0.376812		PEG	-2.07776	5.75412	12.609	0.000383899	0.0103802	0.0636364	0.179973	0.16888	0.246753		LSTK-1-like kinase, putative, expressed
LOC_Os03g43890	Unclassified PEG	1		PEG	-2.79162	2.2876	13.4564	0.000244173	0.00636807	0.0909091	0.179487	0.0727273	0.15		unknown	n.d.	n.d.	n.d.	n.d.	n.d.	n.d.	n.d.	n.d.	n.d.		WD domain, G-beta repeat domain containing protein, expressed
LOC_Os03g47686	Locus-imprinted PEG	1		PEG	-9.3634	3.2003	69.9714	6.01692e-17	6.58241e-15	0	0	0	0		PEG	-6.33869	2.02884	46.0285	1.16543e-11	9.11797e-10	0.0322581	0	0	0		ankyrin, putative, expressed
LOC_Os03g50330	Unclassified PEG	1		PEG	-4.42224	5.2315	79.6384	4.496e-19	6.04125e-17	0.102041	0.037037	0.0217822	0.0286533		unknown	n.d.	n.d.	n.d.	n.d.	n.d.	n.d.	n.d.	n.d.	n.d.		CAMK KIN1/SNF1/Nim1 like.18 - CAMK includes calcium/calmodulin depedent protein kinases, expressed
LOC_Os03g51610	Allelic imprinted PEG	1		biallele	-3.44393	5.14474	21.8737	2.91201e-06	9.99952e-05	0.15444	0.343832	0.0151976	0.0221328		PEG	-2.69381	7.71055	36.4723	1.54852e-09	9.79643e-08	0.15493	0.151635	0.106487	0.104497		Inositol 1, 3, 4-trisphosphate 5/6-kinase, putative, expressed
LOC_Os03g52594	Locus-imprinted PEG	1		PEG	-4.44187	5.27532	70.9115	3.73617e-17	4.12379e-15	0.0347222	0.0306306	0.0903955	0.0139535		PEG	-2.86973	4.91346	38.5988	5.20504e-10	3.44105e-08	0.0738916	0.0613718	0.17033	0.187817		CCR4-NOT transcription factor, putative, expressed
LOC_Os03g53630	Unclassified PEG	1		PEG	-3.93646	6.46621	69.8899	6.27087e-17	6.80004e-15	0.0380623	0.0345455	0.0772059	0.0911854		unknown	n.d.	n.d.	n.d.	n.d.	n.d.	n.d.	n.d.	n.d.	n.d.		PHD finger family protein, putative, expressed
LOC_Os03g54900	Locus-imprinted PEG	1		PEG	-5.53294	5.09582	89.6447	2.85013e-21	4.69777e-19	0.0551181	0.0128617	0.0166667	0.00286533		PEG	-3.93565	2.45554	28.4946	9.39601e-08	4.60126e-06	0.142857	0.0769231	0.0357143	0.0123457		phytosulfokine receptor precursor, putative, expressed
LOC_Os03g54910	Unclassified PEG	1		PEG	-2.79157	4.82772	38.807	4.67847e-10	2.4929e-08	0.117409	0.134146	0.100885	0.132308		unknown	n.d.	n.d.	n.d.	n.d.	n.d.	n.d.	n.d.	n.d.	n.d.		X8 domain containing protein, expressed
LOC_Os03g55630	Unclassified PEG	0.255128		PEG	-2.14273	5.03277	34.053	5.36325e-09	2.60002e-07	0.172577	0.191601	0.153005	0.177057		unknown	n.d.	n.d.	n.d.	n.d.	n.d.	n.d.	n.d.	n.d.	n.d.		expressed protein
LOC_Os03g56250	Allelic imprinted PEG	1		PEG	-2.36292	4.43022	24.6932	6.72197e-07	2.49541e-05	0.13253	0.0932642	0.162162	0.269841		biallele	-2.11008	4.77272	13.5918	0.000227181	0.00650171	0.0444444	0.142857	0.331058	0.318296		LRR receptor-like protein kinase, putative, expressed
LOC_Os03g56310	Locus-imprinted PEG	1		PEG	-3.78204	3.66888	42.4742	7.16205e-11	4.21606e-09	0.0873786	0.0833333	0.0243902	0.0566038		PEG	-2.98454	5.2132	52.525	4.24815e-13	3.95026e-11	0.14527	0.0725806	0.0973451	0.098546		5-nucleotidase domain-containing protein, putative, expressed
LOC_Os03g57130	Unclassified PEG	1		PEG	-3.25151	4.7065	19.7644	8.75987e-06	0.000279097	0.0485437	0.0103093	0.233645	0.205575		unknown	n.d.	n.d.	n.d.	n.d.	n.d.	n.d.	n.d.	n.d.	n.d.		expressed protein
LOC_Os03g57690	Allelic imprinted MEG	1		MEG	2.08996	2.14274	7.60766	0.00581209	0.0471141	0.714286	0.741176	0.885714	0.769231		biallele	0.0541951	4.23347	0.00299261	0.956374	1	0.297872	0.037037	0.855856	0.641667		aldehyde oxidase, putative, expressed
LOC_Os03g58060	Allelic imprinted PEG	1		PEG	-2.09038	5.54798	29.3048	6.18421e-08	2.67305e-06	0.149701	0.225225	0.189189	0.145929		biallele	-1.45992	5.65902	17.0734	3.59634e-05	0.0011712	0.343035	0.266795	0.189274	0.233831		XRN 5'-3' exonuclease N-terminus domain containing protein, expressed
LOC_Os03g58130	Locus-imprinted PEG	1		PEG	-3.58487	7.38417	39.3612	3.52233e-10	1.90978e-08	0.210483	0.128481	0.0213749	0.0320355		PEG	-4.58598	5.82491	42.7635	6.17741e-11	4.58864e-09	0.163673	0.0858726	0.00754148	0.009375		thioredoxin, putative, expressed
LOC_Os03g59680	Unclassified PEG	1		PEG	-4.57606	3.57809	40.9873	1.5322e-10	8.64891e-09	0.0175439	0	0.0769231	0.0833333		unknown	n.d.	n.d.	n.d.	n.d.	n.d.	n.d.	n.d.	n.d.	n.d.		PAPA-1-like conserved region family protein, expressed
LOC_Os03g59740	Unclassified PEG	1		PEG	-4.44983	8.08344	132.833	9.83629e-31	2.76355e-28	0.0473555	0.0382433	0.038942	0.0390462		unknown	n.d.	n.d.	n.d.	n.d.	n.d.	n.d.	n.d.	n.d.	n.d.		ADP-ribosylation factor, putative, expressed
LOC_Os03g60130	Locus-imprinted PEG	1		PEG	-2.12196	7.43219	34.2402	4.87125e-09	2.38962e-07	0.140032	0.118892	0.214106	0.253229		PEG	-1.8769	6.7988	24.2077	8.64878e-07	3.63029e-05	0.234985	0.163612	0.205128	0.230888		transcription elongation factor protein, putative, expressed
LOC_Os03g60150	Locus-imprinted PEG	0.25563		PEG	-4.04849	3.02647	37.499	9.14615e-10	4.77066e-08	0.0277778	0.0647482	0.05	0.0515464		PEG	-5.26185	2.59827	48.442	3.40202e-12	2.84693e-10	0.0149254	0.0204082	0.0222222	0.037037		protein kinase domain containing protein, expressed
LOC_Os03g60710	Locus-imprinted PEG	1		PEG	-4.89965	6.92634	128.243	9.9293e-30	2.72769e-27	0.0493827	0.0496032	0.0125647	0.0229885		PEG	-3.07775	6.30035	35.6787	2.32692e-09	1.43769e-07	0.0491573	0.223847	0.0732984	0.064433		protein kinase domain containing protein, expressed
LOC_Os03g61120	Allelic imprinted PEG	1		biallele	-1.752	6.58361	15.7188	7.34915e-05	0.00206009	0.13857	0.106512	0.344988	0.367308		PEG	-1.98111	8.09252	18.2484	1.93885e-05	0.000669335	0.189281	0.133835	0.221004	0.227183		anthranilate synthase component I-1, chloroplast precursor, putative, expressed
LOC_Os03g62660	Unclassified PEG	1		PEG	-3.06298	4.4328	49.2094	2.30046e-12	1.57991e-10	0.103448	0.113821	0.0833333	0.0984848		unknown	n.d.	n.d.	n.d.	n.d.	n.d.	n.d.	n.d.	n.d.	n.d.		transposon%20protein%2C%20putative%2C%20unclassified%2C%20expressed
LOC_Os03g63040	Locus-imprinted PEG	1		PEG	-3.74431	4.73431	60.2861	8.20258e-15	7.04168e-13	0.0734824	0.027907	0.0980392	0.0754098		PEG	-3.03383	5.25381	63.1578	1.9079e-15	2.23241e-13	0.118705	0.0801034	0.100616	0.115578		expressed protein
LOC_Os03g63770	Allelic imprinted PEG	0.244441		biallele	-2.18954	1.42508	5.09814	0.0239516	0.388568	0.173913	0	0.111111	0.285714		PEG	-2.26756	8.37319	13.8971	0.000193099	0.00562368	0.0650452	0.268073	0.114696	0.142428		RCD1, putative, expressed
LOC_Os04g05030	Allelic imprinted PEG	1		PEG	-3.80104	3.5417	18.962	1.33347e-05	0.000410058	0.0315789	0	0.2	0.17284		biallele	-3.06849	3.50429	13.8223	0.000200939	0.00581361	0.0186335	0.030303	0.188406	0.319588		serine-rich 25 kDa antigen protein, putative, expressed
LOC_Os04g06770	Allelic imprinted PEG	1		PEG	-2.13985	3.98192	18.724	1.51072e-05	0.000456615	0.285714	0.210332	0.152318	0.081761		biallele	-1.63803	4.95234	16.6608	4.46944e-05	0.00143783	0.2	0.170306	0.229314	0.334792		argonaute, putative, expressed
LOC_Os04g08034	Locus-imprinted MEG	1		MEG	3.51137	5.25949	37.1197	1.11097e-09	3.31734e-08	0.7897	0.829596	0.958869	0.970238		MEG	2.51227	5.48185	43.0237	5.40806e-11	2.25569e-09	0.894358	0.778947	0.821577	0.811175		ZOS4-02 - C2H2 zinc finger protein, expressed
LOC_Os04g08470	Locus-imprinted PEG	1		PEG	-6.54573	3.19614	61.5184	4.38624e-15	3.98696e-13	0	0	0	0.0350877		PEG	-5.70345	3.26628	58.8138	1.73322e-14	1.86314e-12	0	0.0315789	0.0225564	0.0188679		OsFBX116 - F-box domain containing protein, expressed
LOC_Os04g08570	Locus-imprinted MEG	1		MEG	10.3648	4.27884	115.071	7.59458e-27	1.21927e-24	1	1	1	1		MEG	10.6292	4.41599	134.914	3.44829e-31	1.08555e-28	1	1	1	1		uncharacterized PE-PGRS family protein PE PGRS20, putative, expressed
LOC_Os04g10260	Locus-imprinted MEG	1		MEG	10.4803	4.42855	121.647	2.75773e-28	5.16531e-26	1	1	1	1		MEG	11.3884	5.15958	179.583	5.97779e-41	5.64559e-38	1	1	1	1		basic region leucine zipper domain containing protein, expressed
LOC_Os04g11830	Locus-imprinted PEG	1		PEG	-3.8992	1.46357	16.8726	3.99747e-05	0.00116824	0.04	0	0.0857143	0.0810811		PEG	-3.31869	1.60059	19.3176	1.10682e-05	0.000399847	0.0810811	0.0344828	0.0697674	0.157895		TCP family transcription factor, putative, expressed
LOC_Os04g13210	Locus-imprinted MEG	1		MEG	3.23572	2.80877	17.4959	2.87934e-05	0.000393743	0.934426	1	0.74026	0.8125		MEG	2.41347	2.50004	15.1044	0.000101727	0.00126651	0.878049	0.741935	0.844156	0.784615		multidrug resistance-associated protein, putative, expressed
LOC_Os04g17700	Allelic imprinted PEG	1		PEG	-2.65989	3.07669	18.8893	1.38524e-05	0.000422825	0.107143	0.2	0.0989011	0.121951		biallele	-1.36511	2.34139	1.10546	0.293071	1	0.685714	0.833333	0.0175439	0.0566038		kinesin heavy chain isolog, putative, expressed
LOC_Os04g20774	Locus-imprinted PEG	1		PEG	-2.15189	7.51843	34.1091	5.21073e-09	2.5419e-07	0.155214	0.108751	0.203163	0.241958		PEG	-2.20807	7.27097	22.9794	1.63749e-06	6.60087e-05	0.174342	0.214644	0.145242	0.136101		pumilio-family RNA binding repeat containing protein, expressed
LOC_Os04g22130	Unclassified MEG	1		unknown	n.d.	n.d.	n.d.	n.d.	n.d.	n.d.	n.d.	n.d.	n.d.		MEG	6.50308	0.771271	19.7495	8.82845e-06	0.000138305	1	1	1	1		conserved hypothetical protein
LOC_Os04g22240	Locus-imprinted PEG	1		PEG	-9.83773	5.32228	179.797	5.36594e-41	3.01517e-38	0	0.00763359	0	0		PEG	-7.53718	5.32988	138.03	7.17939e-32	2.87654e-29	0.013624	0.00343643	0	0.00172712		zinc finger, C3HC4 type domain containing protein, expressed
LOC_Os04g24410	Allelic imprinted PEG	1		biallele	-0.883573	1.45421	0.69692	0.403821	1	0.272727	0.809524	0.12	0.185185		PEG	-2.67157	1.52255	13.7658	0.000207074	0.00597803	0.121951	0.0909091	0.0857143	0.190476		kinesin heavy chain isolog, putative, expressed
LOC_Os04g24710	Allelic imprinted MEG	1		MEG	3.42497	1.1711	9.68459	0.0018582	0.0171042	1	1	0.833333	0.806452		biallele	0.157503	1.50441	0.0600274	0.806453	1	0.611111	0.571429	0.37931	0.4		ubiquitin carboxyl-terminal hydrolase, family 1, putative, expressed
LOC_Os04g25190	Unclassified MEG	1		unknown	n.d.	n.d.	n.d.	n.d.	n.d.	n.d.	n.d.	n.d.	n.d.		MEG	4.26172	0.497147	9.2143	0.00240131	0.0210266	1	1	1	0.916667		pollen allergen, putative, expressed
LOC_Os04g28120	Unclassified MEG	1		unknown	n.d.	n.d.	n.d.	n.d.	n.d.	n.d.	n.d.	n.d.	n.d.		MEG	4.34016	6.67581	18.0565	2.14445e-05	0.000310218	0.941996	0.958333	0.922222	1		response regulator receiver domain containing protein, expressed
LOC_Os04g31170	Locus-imprinted PEG	1		PEG	-6.70511	7.36816	213.978	1.86253e-48	1.91872e-45	0.0168512	0.0082358	0.00485909	0.00718563		PEG	-6.01484	7.99829	27.4339	1.62555e-07	7.64876e-06	0.0383874	0.129906	0.000340716	0.00392157		expressed protein
LOC_Os04g32880	Locus-imprinted PEG	1		PEG	-6.90155	5.85944	185.891	2.50736e-42	1.53673e-39	0.0144168	0.00561798	0.00158479	0.00810811		PEG	-6.39351	5.43648	141.675	1.14541e-32	5.82484e-30	0.00616016	0.0078329	0.00727802	0.0215633		CBS domain containing membrane protein, putative, expressed
LOC_Os04g32970	Locus-imprinted PEG	1		PEG	-5.51339	2.99672	48.2066	3.83601e-12	2.50903e-10	0.0307692	0	0	0.0344828		PEG	-4.77666	3.33251	44.3143	2.79667e-11	2.14986e-09	0.0344828	0	0.0980392	0.0224719		OTU-like cysteine protease family protein, putative, expressed
LOC_Os04g36620	Locus-imprinted PEG	1		PEG	-2.31874	5.47612	40.0279	2.50358e-10	1.36944e-08	0.206081	0.146379	0.125265	0.155361		PEG	-1.77002	5.33048	24.4726	7.53742e-07	3.18402e-05	0.185294	0.209424	0.239923	0.234568		hydrolase, alpha/beta fold family domain containing protein, expressed
LOC_Os04g38525	Locus-imprinted MEG	1		MEG	10.5539	4.47394	125.613	3.73774e-29	7.33429e-27	1	1	1	1		MEG	10.6474	4.44529	122.298	1.98668e-28	4.86443e-26	1	1	1	1		expressed protein
LOC_Os04g38550	Allelic imprinted PEG	1		PEG	-3.56369	3.47709	25.4772	4.47642e-07	1.71856e-05	0.214286	0	0.0355731	0.1		biallele	-1.66052	4.43371	3.76115	0.0524565	0.741796	0.726316	0.308642	0.0126582	0.133956		expressed protein
LOC_Os04g39240	Allelic imprinted PEG	0.259555		PEG	-2.41804	5.18384	35.3932	2.69421e-09	1.34841e-07	0.116667	0.117764	0.164286	0.2		biallele	-1.54493	5.08275	8.56641	0.00342422	0.0730242	0.188571	0.0981595	0.438298	0.349565		expressed protein
LOC_Os04g39560	Locus-imprinted MEG	1		MEG	5.16113	8.58782	114.467	1.02986e-26	1.6322e-24	0.981431	0.96734	0.927089	0.975182		MEG	4.08863	9.17403	48.7178	2.9557e-12	1.49161e-10	0.915049	0.905751	0.937038	0.968355		expressed protein
LOC_Os04g40660	Locus-imprinted PEG	1		PEG	-1.75266	8.91993	18.3709	1.81816e-05	0.000548196	0.2662	0.153561	0.198936	0.236088		PEG	-2.11114	7.92306	16.372	5.20493e-05	0.00166231	0.0738255	0.222853	0.188983	0.195785		MA3 domain containing protein, expressed
LOC_Os04g41470	Locus-imprinted PEG	1		PEG	-3.09874	8.42587	55.5505	9.10892e-14	7.01538e-12	0.0893465	0.082945	0.0941869	0.121816		PEG	-2.7692	8.53322	18.4874	1.71033e-05	0.000598252	0.0493129	0.137883	0.10186	0.14536		expressed protein
LOC_Os04g42250	Locus-imprinted PEG	1		PEG	-6.32896	7.13913	72.6846	1.52117e-17	1.77196e-15	0.00819352	0	0.0311186	0.0202551		PEG	-5.73416	7.08602	107.648	3.20963e-25	7.19283e-23	0.00971867	0.00914634	0.027984	0.0310722		transferase family protein, putative, expressed
LOC_Os04g42260	Allelic imprinted PEG	1		PEG	-6.85923	1.03472	19.4457	1.03501e-05	0.000323101	0	0	0	0		biallele	-6.56713	1.74696	26.8608	2.18645e-07	1.01081e-05	0.00699301	0	NA	0		protein phosphatase 2C, putative, expressed
LOC_Os04g42600	Unclassified PEG	1		PEG	-3.66116	3.49639	15.8569	6.83172e-05	0.00193258	0.224719	0.247706	0	0.015873		unknown	n.d.	n.d.	n.d.	n.d.	n.d.	n.d.	n.d.	n.d.	n.d.		polyadenylate-binding protein, putative, expressed
LOC_Os04g42634	Unclassified PEG	1		PEG	-2.85223	6.27668	58.735	1.80399e-14	1.49671e-12	0.123384	0.0686275	0.110535	0.149182		unknown	n.d.	n.d.	n.d.	n.d.	n.d.	n.d.	n.d.	n.d.	n.d.		expressed protein
LOC_Os04g43130	Unclassified PEG	1		PEG	-3.94486	5.48087	59.3884	1.29431e-14	1.09591e-12	0.0831296	0.0212072	0.0406977	0.069869		unknown	n.d.	n.d.	n.d.	n.d.	n.d.	n.d.	n.d.	n.d.	n.d.		transcriptional corepressor LEUNIG, putative, expressed
LOC_Os04g44710	Unclassified PEG	1		PEG	-5.97117	4.41696	83.8207	5.41751e-20	7.78736e-18	0.0106952	0	0.0314465	0.026738		unknown	n.d.	n.d.	n.d.	n.d.	n.d.	n.d.	n.d.	n.d.	n.d.		double-stranded RNA binding motif containing protein, expressed
LOC_Os04g46020	Allelic imprinted PEG	1		PEG	-2.4588	3.13029	20.0244	7.64585e-06	0.000246783	0.122449	0.184211	0.108696	0.157143		biallele	-1.52801	4.20659	9.80078	0.00174437	0.0410394	0.394636	0.278351	0.157895	0.180812		GATA zinc finger domain containing protein, expressed
LOC_Os04g47410	Unclassified PEG	0.18588		unknown	n.d.	n.d.	n.d.	n.d.	n.d.	n.d.	n.d.	n.d.	n.d.		PEG	-2.3711	2.13458	14.4413	0.000144597	0.00433529	0.211268	0.155556	0.163636	0.08		DHHC zinc finger domain containing protein, expressed
LOC_Os04g51380	Unclassified PEG	1		PEG	-3.4912	2.25087	12.4868	0.000409839	0.0102559	0.0322581	0	0.212121	0.181818		unknown	n.d.	n.d.	n.d.	n.d.	n.d.	n.d.	n.d.	n.d.	n.d.		protein-S-isoprenylcysteine O-methyltransferase. tax, putative, expressed
LOC_Os04g53450	Locus-imprinted PEG	1		PEG	-2.89336	3.87323	21.3396	3.84709e-06	0.000127843	0.0526316	0.0413223	0.245283	0.159091		PEG	-1.98231	4.87885	26.3702	2.81855e-07	1.28506e-05	0.226537	0.166078	0.206897	0.163842		expressed protein
LOC_Os04g55960	Allelic imprinted PEG	1		PEG	-2.51875	5.53562	47.1511	6.5721e-12	4.16646e-10	0.122581	0.134483	0.168443	0.134021		biallele	-1.75501	5.4011	21.4067	3.71475e-06	0.000144036	0.215407	0.173824	0.300935	0.185629		NADPH reductase, putative, expressed
LOC_Os04g56720	Unclassified PEG	1		unknown	n.d.	n.d.	n.d.	n.d.	n.d.	n.d.	n.d.	n.d.	n.d.		PEG	-3.25148	3.42371	30.4464	3.43219e-08	1.83726e-06	0.117647	0.0701754	0.108108	0.047619		RCC2, putative, expressed
LOC_Os04g57640	Unclassified PEG	1		unknown	n.d.	n.d.	n.d.	n.d.	n.d.	n.d.	n.d.	n.d.	n.d.		PEG	-3.03114	7.25729	41.1299	1.42439e-10	1.02355e-08	0.0657895	0.0676787	0.154942	0.156028		RCD1, putative, expressed
LOC_Os05g01020	Locus-imprinted PEG	1		PEG	-2.21728	7.60414	28.5694	9.03998e-08	3.81407e-06	0.0926187	0.117148	0.257583	0.2508		PEG	-2.01618	7.29709	23.1605	1.49026e-06	6.04423e-05	0.125946	0.181446	0.220877	0.234138		transcriptional repressor, putative, expressed
LOC_Os05g01210	Locus-imprinted PEG	1		PEG	-4.32741	5.4423	21.644	3.28242e-06	0.000110867	0.19633	0.131367	0	0.0127226		PEG	-3.47139	6.00082	36.9806	1.19313e-09	7.58441e-08	0.0769231	0.142857	0.0310421	0.0610329		expressed protein
LOC_Os05g01230	Locus-imprinted PEG	1		PEG	-2.90759	7.55644	48.5757	3.17781e-12	2.13501e-10	0.118403	0.05919	0.120939	0.13414		PEG	-2.38981	7.82024	18.6511	1.56956e-05	0.000553408	0.240143	0.245534	0.107655	0.0828233		zinc finger, C3HC4 type domain containing protein, expressed
LOC_Os05g01240	Locus-imprinted PEG	0.12431		PEG	-4.37516	6.05204	48.4714	3.35136e-12	2.22739e-10	0.030256	0.00496689	0.0923483	0.0976562		PEG	-3.51754	5.9075	38.5293	5.39378e-10	3.54809e-08	0.0327103	0.0693431	0.0559701	0.131928		AML1, putative, expressed
LOC_Os05g01710	Locus-imprinted PEG	1		PEG	-2.86464	4.63686	33.6898	6.46379e-09	3.09711e-07	0.080292	0.0762527	0.183673	0.130802		PEG	-2.29254	4.83401	30.8631	2.76884e-08	1.5004e-06	0.160142	0.135531	0.19708	0.14094		transcription initiation factor IIA gamma chain, putative, expressed
LOC_Os05g03630	Locus-imprinted PEG	1		PEG	-5.84399	2.5223	35.7377	2.25755e-09	1.13447e-07	0.0540541	0	0	0		PEG	-3.73177	2.08751	18.074	2.12481e-05	0.000725949	0.0344828	0	0.0285714	0.185185		dnaJ domain containing protein, expressed
LOC_Os05g04330	Locus-imprinted PEG	1		PEG	-5.00268	4.52068	72.6159	1.57503e-17	1.80282e-15	0.040201	0.0212766	0	0.0454545		PEG	-5.55436	4.41523	86.9798	1.09636e-20	1.90738e-18	0.0200573	0.0334347	0.00892857	0.0144928		DNA methyltransferase protein, putative, expressed
LOC_Os05g04520	Allelic imprinted PEG	1		biallele	-2.76613	5.37762	18.0709	2.12834e-05	0.00063966	0.287212	0.314685	0.0230769	0.0548673		PEG	-2.38816	5.7972	41.2026	1.37237e-10	9.91555e-09	0.176768	0.201465	0.108046	0.137466		protein kinase, putative, expressed
LOC_Os05g05660	Locus-imprinted MEG	1		MEG	2.52724	5.43455	34.4816	4.30303e-09	1.17686e-07	0.846809	0.749288	0.847036	0.877246		MEG	2.24422	5.43019	37.4512	9.3731e-10	3.29604e-08	0.793103	0.828715	0.761733	0.823423		PWWP domain containing protein, expressed
LOC_Os05g05780	Locus-imprinted PEG	1		PEG	-4.38228	5.16494	89.0415	3.86607e-21	6.12723e-19	0.0202429	0.04	0.0716511	0.0465632		PEG	-4.46503	5.63456	124.843	5.50976e-29	1.65568e-26	0.0449069	0.042471	0.0434783	0.0329341		chromatin-remodeling complex ATPase chain, putative, expressed
LOC_Os05g05790	Unclassified PEG	1		unknown	n.d.	n.d.	n.d.	n.d.	n.d.	n.d.	n.d.	n.d.	n.d.		PEG	-4.38823	2.44147	26.8682	2.17814e-07	1.01051e-05	0.038961	0	0.027027	0.0909091		double-stranded RNA binding motif containing protein, expressed
LOC_Os05g05800	Locus-imprinted PEG	0.217653		PEG	-4.71067	1.61998	21.0481	4.47895e-06	0.000146867	0.0666667	0	0.0833333	0		PEG	-3.72768	1.37518	20.3084	6.59104e-06	0.000248991	0.0666667	0.047619	0.0526316	0.0697674		OsFBL21 - F-box domain and LRR containing protein, expressed
LOC_Os05g07670	Allelic imprinted PEG	1		PEG	-1.78883	3.87116	14.8941	0.000113719	0.00310329	0.241026	0.208955	0.227273	0.160221		biallele	-1.05765	3.5252	4.44988	0.0349036	0.547596	0.326203	0.203883	0.387097	0.340541		solute carrier family 35 member E3, putative, expressed
LOC_Os05g07720	Unclassified PEG	1		PEG	-8.40083	6.91319	87.5968	8.02551e-21	1.2099e-18	0.023166	0	0.000449035	0		unknown	n.d.	n.d.	n.d.	n.d.	n.d.	n.d.	n.d.	n.d.	n.d.		alliin lyase precursor, putative, expressed
LOC_Os05g08840	Locus-imprinted PEG	1		PEG	-5.59963	6.71175	108.802	1.79307e-25	3.75695e-23	0.0165209	0.0117647	0.0364322	0.00697134		PEG	-4.31823	7.08308	96.6151	8.4202e-23	1.64362e-20	0.0523146	0.0360183	0.035453	0.0601557		DnaK family protein, putative, expressed
LOC_Os05g09708	Unclassified MEG	1		unknown	n.d.	n.d.	n.d.	n.d.	n.d.	n.d.	n.d.	n.d.	n.d.		MEG	6.89485	1.09681	23.4509	1.2814e-06	2.44131e-05	1	1	1	1		expressed protein
LOC_Os05g10800	Locus-imprinted MEG	1		MEG	7.09323	6.50057	183.632	7.80786e-42	4.19656e-39	0.980551	0.988372	1	1		MEG	11.7276	5.5037	177.754	1.49931e-40	1.16611e-37	1	1	1	1		expressed protein
LOC_Os05g11140	Locus-imprinted PEG	1		PEG	-9.02972	6.01276	248.218	6.35187e-56	2.61739e-52	0.00202429	0	0	0.00369914		PEG	-8.05723	5.89694	175.039	5.86948e-40	6.46719e-37	0.00130039	0	0.00273224	0.00781929		CK1 CaseinKinase 1a.5 - CK1 includes the casein kinase 1 kinases, expressed
LOC_Os05g12170	Allelic imprinted PEG	0.0767767		biallele	-2.36845	2.82817	3.69652	0.054526	0.743165	0.0505051	0	0.545455	0.5		PEG	-3.63808	2.09861	13.6046	0.000225634	0.00647728	0	0.0666667	0.0434783	0.179487		plant-specific domain TIGR01589 family protein, putative, expressed
LOC_Os05g12670	Locus-imprinted PEG	1		PEG	-3.91573	5.26791	75.8835	3.0091e-18	3.79577e-16	0.0344828	0.0660793	0.0626566	0.0636943		PEG	-3.35913	4.22082	23.8634	1.03421e-06	4.28663e-05	0.0206897	0.0869565	0.0869565	0.106977		expressed protein
LOC_Os05g14440	Unclassified MEG	1		unknown	n.d.	n.d.	n.d.	n.d.	n.d.	n.d.	n.d.	n.d.	n.d.		MEG	6.77725	1.00549	22.0955	2.5942e-06	4.63521e-05	1	1	1	1		transposon%20protein%2C%20putative%2C%20Ac%2FDs%20sub-class%2C%20expressed
LOC_Os05g23870	Allelic imprinted MEG	1		biallele	5.93614	0.59317	9.93184	0.00162444	0.0151329	1	1	NA	NA		MEG	6.69041	0.91547	21.4266	3.67643e-06	6.33765e-05	1	1	1	1		transposon%20protein%2C%20putative%2C%20Mutator%20sub-class%2C%20expressed
LOC_Os05g23950	Locus-imprinted MEG	1		MEG	4.05598	1.27999	11.8183	0.000586511	0.00609107	0.953488	1	1	0.818182		MEG	3.09854	1.83034	15.2424	9.45543e-05	0.00119294	0.954545	1	0.806452	0.803279		TRAF-type zinc finger family protein, expressed
LOC_Os05g24000	Unclassified PEG	1		unknown	n.d.	n.d.	n.d.	n.d.	n.d.	n.d.	n.d.	n.d.	n.d.		PEG	-4.22621	4.23811	59.4288	1.26801e-14	1.38559e-12	0.0804598	0.0555556	0.0517241	0.0114068		expressed protein
LOC_Os05g26040	Locus-imprinted MEG	1		MEG	6.42934	8.69272	37.9545	7.24127e-10	2.23233e-08	0.996512	0.99944	0.887056	0.952756		MEG	8.00053	9.07246	133.126	8.48682e-31	2.55029e-28	0.993913	0.993668	0.997473	0.996193		pumilio-family RNA binding repeat containing protein, expressed
LOC_Os05g26110	Locus-imprinted MEG	1		MEG	10.9825	6.74337	263.696	2.68453e-59	1.65931e-55	0.998875	1	1	1		MEG	10.3896	6.80483	215.988	6.78486e-49	2.99031e-45	1	1	1	0.997706		transposon%20protein%2C%20putative%2C%20Mutator%20sub-class%2C%20expressed
LOC_Os05g26750	Locus-imprinted MEG	1		MEG	3.58498	3.21074	24.0973	9.15908e-07	1.68239e-05	0.977654	0.954545	0.745455	0.855072		MEG	3.04464	7.00906	35.1335	3.07858e-09	9.71481e-08	0.938351	0.836386	0.956767	0.751825		PROLM17 - Prolamin precursor, expressed
LOC_Os05g26770	Locus-imprinted MEG	1		MEG	5.22668	4.09735	55.676	8.54539e-14	4.42001e-12	0.95302	0.985294	0.969231	1		MEG	3.63087	4.58779	43.6372	3.95251e-11	1.69126e-09	0.95082	0.940789	0.929936	0.788991		PROLM18 - Prolamin precursor, expressed
LOC_Os05g28180	Locus-imprinted PEG	1		PEG	-4.26929	4.516	62.6434	2.47733e-15	2.33777e-13	0.0497512	0.0310078	0.0384615	0.0539683		PEG	-4.64138	4.97453	56.7265	5.00845e-14	5.08637e-12	0.020794	0.0339426	0.00507614	0.0928962		AMP deaminase, putative, expressed
LOC_Os05g28440	Allelic imprinted PEG	1		biallele	-3.8452	3.10566	10.9592	0.0009314	0.0216428	0	0	0.174312	0.384615		PEG	-5.77962	2.98514	42.1389	8.50141e-11	6.24476e-09	0.00487805	0	0.0877193	0		expressed protein
LOC_Os05g28860	Unclassified PEG	1		PEG	-4.58146	2.14272	25.2775	4.96475e-07	1.90013e-05	0.0847458	0	0.0149254	0.0222222		unknown	n.d.	n.d.	n.d.	n.d.	n.d.	n.d.	n.d.	n.d.	n.d.		3'-5' exonuclease, putative, expressed
LOC_Os05g28870	Unclassified PEG	1		PEG	-3.81176	2.33404	20.9143	4.80305e-06	0.000157077	0.142857	0	0.0555556	0.075		unknown	n.d.	n.d.	n.d.	n.d.	n.d.	n.d.	n.d.	n.d.	n.d.		mitochondrial carrier protein, putative, expressed
LOC_Os05g30150	Locus-imprinted MEG	1		MEG	5.87583	3.03933	51.4939	7.18185e-13	3.26405e-11	1	1	0.974359	0.955556		MEG	2.72946	3.73448	23.0056	1.61527e-06	3.02508e-05	0.959799	0.865169	0.707865	0.820359		amino acid transporter family protein, putative, expressed
LOC_Os05g31380	Locus-imprinted PEG	1		PEG	-8.19697	2.12908	50.4008	1.25346e-12	8.90533e-11	0	0	0	0		PEG	-5.18112	3.12722	39.8903	2.68629e-10	1.8499e-08	0.0298507	0	0	0.0909091		GRAS family transcription factor containing protein, expressed
LOC_Os05g34310	Locus-imprinted MEG	1		MEG	7.62324	8.83835	136.558	1.50668e-31	3.58183e-29	0.998346	0.984649	0.995536	0.995828		MEG	8.81391	8.94961	136.058	1.93799e-31	6.24977e-29	0.99956	0.996947	0.996677	0.996563		no apical meristem protein, putative, expressed
LOC_Os05g34510	Locus-imprinted PEG	1		PEG	-2.55849	11.2834	21.4615	3.60997e-06	0.000120939	0.11718	0.110901	0.170273	0.150623		PEG	-2.33347	11.0734	12.6793	0.000369728	0.0100175	0.125062	0.109984	0.214341	0.194418		expressed protein
LOC_Os05g34670	Allelic imprinted MEG	1		MEG	2.14735	3.77665	8.30951	0.0039438	0.0333241	0.765217	1	0.744681	0.802198		biallele	1.42313	4.05087	8.61476	0.0033345	0.0280284	0.69727	0.786982	0.542484	0.811966		KH domain containing protein, putative, expressed
LOC_Os05g38600	Locus-imprinted MEG	1		MEG	2.66129	4.73096	28.8048	8.00511e-08	1.75149e-06	0.806452	0.873684	0.86	0.855908		MEG	2.66854	3.58733	8.44688	0.00365669	0.030408	0.705882	0.807407	1	0.866667		ZOS5-09 - C2H2 zinc finger protein, expressed
LOC_Os05g38640	Locus-imprinted PEG	0.0667519		PEG	-2.23227	5.28238	34.7084	3.82984e-09	1.89378e-07	0.197652	0.144708	0.159794	0.15444		PEG	-2.23271	4.77914	23.1801	1.47516e-06	6.0014e-05	0.242363	0.135135	0.0868167	0.181237		Core histone H2A/H2B/H3/H4 domain containing protein, putative, expressed
LOC_Os05g40790	Locus-imprinted MEG	1		MEG	7.77676	6.74114	217.863	2.64584e-49	2.18053e-46	0.996558	1	0.985552	0.993637		MEG	7.40612	7.94047	146.707	9.09508e-34	3.8792e-31	0.995533	0.997914	0.988336	0.986258		CCR4-NOT transcription factor, putative, expressed
LOC_Os05g40810	Locus-imprinted PEG	0.160122		PEG	-3.84151	1.9097	16.1078	5.98369e-05	0.00171228	0	0	0.136364	0.129032		PEG	-2.47225	1.90947	12.4089	0.000427289	0.0115063	0.181818	0.0666667	0.114754	0.153846		BRCA1 C Terminus domain containing protein, expressed
LOC_Os05g41210	Unclassified PEG	1		PEG	-7.08345	2.29336	46.9858	7.15044e-12	4.50988e-10	0	0.0117647	0	0		unknown	n.d.	n.d.	n.d.	n.d.	n.d.	n.d.	n.d.	n.d.	n.d.		OsCam2 - Calmodulin, expressed
LOC_Os05g41220	Locus-imprinted PEG	0.174584		PEG	-4.5907	3.65179	44.5646	2.461e-11	1.49132e-09	0.0326087	0	0.103448	0.038835		PEG	-4.13662	4.03913	26.3332	2.87307e-07	1.30095e-05	0.0102564	0.0154799	0.150685	0.166667		SNF1-related protein kinase regulatory subunit beta-1, putative, expressed
LOC_Os05g41790	Unclassified PEG	1		PEG	-4.0422	3.66811	34.8457	3.56902e-09	1.77904e-07	0.0538922	0	0.102804	0.0864198		unknown	n.d.	n.d.	n.d.	n.d.	n.d.	n.d.	n.d.	n.d.	n.d.		zinc finger C-x8-C-x5-C-x3-H type family protein, expressed
LOC_Os05g43480	Locus-imprinted PEG	1		PEG	-6.3102	4.84612	77.6156	1.25179e-18	1.64493e-16	0.037594	0	0.00793651	0.00263852		PEG	-4.59665	5.09027	100.406	1.24135e-23	2.56454e-21	0.0465116	0.0253807	0.026738	0.0496183		ubiquitin carboxyl-terminal hydrolase domain containing protein, expressed
LOC_Os05g43570	Locus-imprinted PEG	1		PEG	-2.37846	4.01666	25.9059	3.58469e-07	1.41578e-05	0.212963	0.113402	0.153285	0.125541		PEG	-2.06642	4.55145	24.5169	7.36591e-07	3.14168e-05	0.2	0.2	0.155844	0.17833		AGC AGC other NDRh TRCd.2 - ACG kinases include homologs to PKA, PKG and PKC, expressed
LOC_Os05g45930	Locus-imprinted PEG	1		PEG	-4.47168	6.6366	145.015	2.13138e-33	6.93372e-31	0.0365854	0.0375427	0.05345	0.031185		PEG	-3.54647	7.07002	59.2622	1.37999e-14	1.49559e-12	0.103843	0.0324022	0.0756534	0.100543		IQ calmodulin-binding motif family protein, putative, expressed
LOC_Os05g46660	Unclassified MEG	1		unknown	n.d.	n.d.	n.d.	n.d.	n.d.	n.d.	n.d.	n.d.	n.d.		MEG	7.38547	1.52561	27.6069	1.48647e-07	3.47245e-06	1	1	1	1		transposon%20protein%2C%20putative%2C%20Mutator%20sub-class
LOC_Os05g48280	Locus-imprinted PEG	1		PEG	-1.47504	6.52643	21.314	3.89864e-06	0.000128864	0.287469	0.240633	0.225873	0.251604		PEG	-1.55877	6.68566	15.379	8.79596e-05	0.00267357	0.242507	0.236496	0.258489	0.227053		expressed protein
LOC_Os05g48560	Locus-imprinted PEG	1		PEG	-7.90868	4.38223	60.473	7.4594e-15	6.58665e-13	0.0153846	0	0	0		PEG	-6.56625	4.79728	124.745	5.78803e-29	1.70065e-26	0.00911854	0.00970874	0	0.017341		expressed protein
LOC_Os05g48590	Locus-imprinted PEG	0.0477024		PEG	-4.04776	4.39463	37.9636	7.20762e-10	3.77545e-08	0.0951009	0.167286	0.0116279	0.016129		PEG	-2.6078	4.04319	25.5532	4.30348e-07	1.89669e-05	0.162791	0.0542636	0.125	0.180812		OsIAA19 - Auxin-responsive Aux/IAA gene family member, expressed
LOC_Os05g48610	Allelic imprinted MEG	1		MEG	2.42521	4.8258	36.5496	1.48833e-09	4.33933e-08	0.822115	0.839763	0.804651	0.812274		biallele	3.47469	6.16442	9.25196	0.00235244	0.0206946	0.99909	0.961938	0.556701	0.596838		expressed protein
LOC_Os05g48970	Unclassified PEG	1		PEG	-5.69609	3.67076	61.6233	4.15874e-15	3.80817e-13	0.025641	0	0.0434783	0		unknown	n.d.	n.d.	n.d.	n.d.	n.d.	n.d.	n.d.	n.d.	n.d.		zinc finger, C3HC4 type domain containing protein, expressed
LOC_Os05g48980	Locus-imprinted PEG	1		PEG	-7.41225	1.42288	26.1807	3.10922e-07	1.24389e-05	0	0	0	0		PEG	-7.05025	2.1601	52.5001	4.3022e-13	3.95026e-11	0	0	0	0.0243902		ras-related protein, putative, expressed
LOC_Os05g50390	Locus-imprinted MEG	1		MEG	9.105	3.06887	46.6529	8.47432e-12	3.31518e-10	1	1	1	1		MEG	5.52679	2.71405	39.9339	2.62698e-10	9.83964e-09	1	0.97561	0.942029	1		expressed protein
LOC_Os05g50960	Allelic imprinted PEG	1		PEG	-2.27155	3.63649	19.2562	1.143e-05	0.00035413	0.185714	0.15894	0.146067	0.160494		biallele	-1.95764	3.83356	9.83243	0.00171462	0.0404833	0.325301	0.333333	0.0925926	0.107692		polygalacturonase, putative, expressed
LOC_Os05g50970	Locus-imprinted PEG	1		PEG	-5.55211	1.57347	24.8336	6.24991e-07	2.34125e-05	0	0	0.030303	0.04		PEG	-4.55116	2.08027	31.4682	2.02737e-08	1.13105e-06	0	0.0967742	0.038961	0.015873		protein phosphatase 2C, putative, expressed
LOC_Os05g51400	Allelic imprinted PEG	1		biallele	-3.65319	6.15961	14.7192	0.000124769	0.00338987	0.00860047	0.0139319	0.236364	0.367232		PEG	-4.52645	5.88976	107.138	4.15298e-25	9.15178e-23	0.0333116	0.0285714	0.0663507	0.0322581		protein kinase APK1B, chloroplast precursor, putative, expressed
LOC_Os06g01680	Locus-imprinted PEG	1		PEG	-2.59395	7.24963	64.8705	7.99837e-16	8.0794e-14	0.139205	0.15168	0.135135	0.108732		PEG	-2.15954	7.80467	25.9983	3.41717e-07	1.52127e-05	0.195182	0.137822	0.190661	0.175027		expressed protein
LOC_Os06g02028	Locus-imprinted PEG	1		PEG	-6.34882	8.10324	103.393	2.74785e-24	5.56867e-22	0.00388176	0.00520704	0.0305927	0.0217236		PEG	-4.58806	8.07899	76.8278	1.86533e-18	2.62376e-16	0.0492175	0.019124	0.0527793	0.0341615		eyes absent homolog 4, putative, expressed
LOC_Os06g03770	Unclassified PEG	1		PEG	-3.95014	2.63952	20.4484	6.12605e-06	0.00019929	0.024	0	0.190476	0.0769231		unknown	n.d.	n.d.	n.d.	n.d.	n.d.	n.d.	n.d.	n.d.	n.d.		ABC transporter, ATP-binding protein, putative, expressed
LOC_Os06g03860	Unclassified PEG	1		PEG	-1.94012	3.35505	13.4813	0.000240954	0.0062974	0.277778	0.26087	0.111111	0.156463		unknown	n.d.	n.d.	n.d.	n.d.	n.d.	n.d.	n.d.	n.d.	n.d.		uncharacterized membrane protein, putative, expressed
LOC_Os06g04920	Unclassified PEG	1		PEG	-5.81799	2.18654	26.3059	2.91399e-07	1.16957e-05	0	0	0.125	0		unknown	n.d.	n.d.	n.d.	n.d.	n.d.	n.d.	n.d.	n.d.	n.d.		zinc finger family protein, putative, expressed
LOC_Os06g04930	Unclassified PEG	0.178428		PEG	-4.10089	10.1893	45.8705	1.26333e-11	7.73133e-10	0.0779191	0.0924534	0.0282149	0.034844		unknown	n.d.	n.d.	n.d.	n.d.	n.d.	n.d.	n.d.	n.d.	n.d.		expressed protein
LOC_Os06g06870	Locus-imprinted PEG	1		PEG	-7.126	3.51257	88.0271	6.45624e-21	1.01028e-18	0.00653595	0	0	0.0147059		PEG	-7.57675	4.38324	133.859	5.86544e-31	2.15425e-28	0.00518135	0	0.00355872	0.00769231		zinc finger protein, putative, expressed
LOC_Os06g07700	Unclassified PEG	1		PEG	-4.2734	2.21741	21.3282	3.87006e-06	0.000128262	0.153846	0	0.0172414	0.0714286		unknown	n.d.	n.d.	n.d.	n.d.	n.d.	n.d.	n.d.	n.d.	n.d.		expressed protein
LOC_Os06g08740	Locus-imprinted PEG	1		PEG	-4.73846	7.24763	60.5919	7.02219e-15	6.2452e-13	0.102763	0.0819672	0.0112749	0.0095991		PEG	-3.9306	7.39906	43.35	4.57743e-11	3.43879e-09	0.0928297	0.153089	0.0283878	0.0210643		expressed protein
LOC_Os06g11190	Allelic imprinted PEG	0.162081		biallele	-3.34412	1.60373	6.45168	0.0110847	0.198882	0.2	NA	0	0.0526316		PEG	-3.03621	2.32689	18.0549	2.14626e-05	0.000729931	0.233333	0.0810811	0.0384615	0.0740741		OsPOP13 - Putative Prolyl Oligopeptidase homologue, expressed
LOC_Os06g11620	Locus-imprinted PEG	1		PEG	-2.91529	5.65814	32.1902	1.39791e-08	6.42413e-07	0.0772277	0.0352564	0.188366	0.21978		PEG	-2.68669	4.08013	23.6684	1.14446e-06	4.72876e-05	0.0534979	0.091954	0.181467	0.227053		RNA recognition motif containing protein, putative, expressed
LOC_Os06g11730	Locus-imprinted MEG	1		MEG	7.90037	3.77204	86.7232	1.24827e-20	1.26484e-18	1	1	0.983471	1		MEG	5.92691	1.83691	33.9074	5.77997e-09	1.70968e-07	1	0.941176	1	1		RNA recognition motif containing protein, putative, expressed
LOC_Os06g12260	Allelic imprinted PEG	1		PEG	-2.37959	5.9635	42.371	7.54997e-11	4.40249e-09	0.15601	0.10495	0.140351	0.213162		biallele	-1.99273	3.23778	9.24814	0.00235735	0.0530082	0.390625	0.294118	0.156627	0.0551181		N-rich protein, putative, expressed
LOC_Os06g12280	Unclassified PEG	0.197879		PEG	-2.77039	2.81335	15.7255	7.32285e-05	0.00205943	0.148148	0	0.173913	0.147541		unknown	n.d.	n.d.	n.d.	n.d.	n.d.	n.d.	n.d.	n.d.	n.d.		glycosyl transferase 8 domain containing protein, putative, expressed
LOC_Os06g12590	Locus-imprinted PEG	1		PEG	-4.24777	3.38436	48.2521	3.74796e-12	2.46448e-10	0.0310559	0.0378378	0.0769231	0.04		PEG	-4.06127	1.94241	26.6518	2.43624e-07	1.12237e-05	0.0217391	0.0434783	0.117647	0.037037		protein kinase, putative, expressed
LOC_Os06g14440	Allelic imprinted PEG	1		PEG	-2.84407	4.33578	25.6743	4.0417e-07	1.56625e-05	0.110577	0.0304878	0.172932	0.17037		biallele	-2.01883	4.27907	17.2946	3.20099e-05	0.00105545	0.133758	0.122642	0.326203	0.228758		DRD1, putative, expressed
LOC_Os06g19650	Locus-imprinted PEG	1		PEG	-2.6764	5.45719	48.9903	2.57234e-12	1.74721e-10	0.149606	0.0871671	0.161491	0.121951		PEG	-2.44259	3.97522	21.696	3.19459e-06	0.000124599	0.212598	0.0521327	0.149171	0.218935		expressed protein
LOC_Os06g19660	Allelic imprinted PEG	1		PEG	-3.66089	5.17003	52.3102	4.73905e-13	3.50803e-11	0.0905512	0.018797	0.0984848	0.0775681		biallele	-1.39474	4.70055	11.2331	0.000803526	0.020392	0.291925	0.163793	0.32	0.270517		WD domain, G-beta repeat domain containing protein, expressed
LOC_Os06g21600	Locus-imprinted PEG	1		PEG	-2.92737	3.92491	13.6444	0.000220899	0.00583496	0.0871369	0	0.232143	0.215909		PEG	-2.1492	3.32813	14.1195	0.000171556	0.0050632	0.142857	0.0789474	0.236641	0.25641		selenoprotein O, putative, expressed
LOC_Os06g21900	Locus-imprinted PEG	0.183291		PEG	-5.64592	7.02624	142.877	6.25358e-33	1.98222e-30	0.00781805	0.0235064	0.0144132	0.0239362		PEG	-4.59194	7.82414	42.7019	6.37505e-11	4.70899e-09	0.0124688	0.0221509	0.0701576	0.0691772		expressed protein
LOC_Os06g23460	Locus-imprinted PEG	1		PEG	-2.15426	4.118	21.6988	3.1899e-06	0.000108632	0.241379	0.209302	0.118774	0.146245		PEG	-2.50128	4.69684	28.5166	9.28997e-08	4.56625e-06	0.0614251	0.165775	0.140969	0.242775		KH domain containing protein, putative, expressed
LOC_Os06g28820	Unclassified PEG	1		unknown	n.d.	n.d.	n.d.	n.d.	n.d.	n.d.	n.d.	n.d.	n.d.		PEG	-4.11224	0.886673	9.96287	0.00159728	0.0380528	0	0	0	0.2		cycloartenol synthase, putative, expressed
LOC_Os06g29250	Unclassified MEG	1		MEG	3.17038	1.79097	8.43198	0.00368678	0.0314969	1	1	0.703704	0.744681		unknown	n.d.	n.d.	n.d.	n.d.	n.d.	n.d.	n.d.	n.d.	n.d.		expressed protein
LOC_Os06g29740	Allelic imprinted MEG	1		MEG	7.97775	2.18286	35.1387	3.07036e-09	8.54861e-08	1	1	1	1		biallele	7.2103	1.39792	20.735	5.27423e-06	8.68442e-05	1	1	1	NA		OsFBX197 - F-box domain containing protein, expressed
LOC_Os06g30060	Locus-imprinted PEG	1		PEG	-7.71925	4.95189	151.396	8.58527e-35	3.1215e-32	0.00201207	0	0.0100334	0.00529101		PEG	-8.15326	6.20554	178.696	9.33639e-41	1.12223e-37	0.000676133	0.000921659	0.00732064	0.00715308		expressed protein
LOC_Os06g30280	Locus-imprinted MEG	1		MEG	6.3798	4.90051	107.056	4.3274e-25	6.36849e-23	0.986441	0.960396	0.992337	0.995671		MEG	8.88581	7.48841	86.5471	1.36445e-20	1.73469e-18	1	0.999469	0.988278	1		expressed protein
LOC_Os06g32944	Unclassified MEG	1		MEG	7.07752	1.34355	20.2873	6.664e-06	0.000104016	1	1	1	1		unknown	n.d.	n.d.	n.d.	n.d.	n.d.	n.d.	n.d.	n.d.	n.d.		transposon%20protein%2C%20putative%2C%20Pong%20sub-class%2C%20expressed
LOC_Os06g33640	Locus-imprinted MEG	1		MEG	8.77994	9.9724	73.4996	1.00657e-17	7.97645e-16	0.998791	1	0.994109	0.989215		MEG	8.48172	9.23762	40.9988	1.52325e-10	5.92366e-09	1	0.999395	0.997623	0.97673		CAPIP1, putative, expressed
LOC_Os06g33690	Locus-imprinted MEG	1		MEG	6.00389	9.31619	59.2739	1.37184e-14	7.81504e-13	0.935079	0.968726	0.994007	0.994288		MEG	7.20146	8.06601	32.8141	1.01406e-08	2.87724e-07	0.999226	0.998869	0.996066	0.949811		CAPIP1, putative, expressed
LOC_Os06g35160	Allelic imprinted PEG	1		biallele	-1.97941	2.40713	3.26268	0.0708732	0.892195	0.272727	NA	0.120567	0.172414		PEG	-4.42873	2.49268	37.2265	1.05177e-09	6.7181e-08	0.0331126	0.0588235	0.0344828	0.030303		CAMK KIN1/SNF1/Nim1 like.26 - CAMK includes calcium/calmodulin depedent protein kinases, expressed
LOC_Os06g35530	Locus-imprinted PEG	1		PEG	-2.24226	5.89389	38.1733	6.47307e-10	3.40511e-08	0.221212	0.135371	0.151414	0.172147		PEG	-2.36556	5.62058	43.5163	4.20435e-11	3.17657e-09	0.166667	0.153693	0.12605	0.176471		CGMC GSK.8 - CGMC includes CDA, MAPK, GSK3, and CLKC kinases, expressed
LOC_Os06g37160	Unclassified PEG	1		PEG	-2.96083	6.64166	50.1023	1.45934e-12	1.02502e-10	0.0632411	0.0592976	0.194581	0.160656		unknown	n.d.	n.d.	n.d.	n.d.	n.d.	n.d.	n.d.	n.d.	n.d.		transmembrane 9 superfamily member, putative, expressed
LOC_Os06g37640	Allelic imprinted PEG	1		PEG	-2.33772	4.81145	24.2119	8.62991e-07	3.11939e-05	0.139588	0.0808081	0.197568	0.233831		biallele	-1.0341	5.18321	4.97847	0.0256646	0.427247	0.213518	0.165266	0.449153	0.501134		expressed protein
LOC_Os06g37660	Allelic imprinted PEG	1		PEG	-2.3684	5.36375	33.2626	8.05175e-09	3.77029e-07	0.214008	0.206133	0.0848126	0.137662		biallele	-1.09152	0.675781	1.11935	0.290059	1	0.481481	0.333333	1	0.0909091		OsPP2Ac-1 - Phosphatase 2A isoform 1 belonging to family 1, expressed
LOC_Os06g37830	Unclassified MEG	1		unknown	n.d.	n.d.	n.d.	n.d.	n.d.	n.d.	n.d.	n.d.	n.d.		MEG	6.78492	0.984254	24.0875	9.2056e-07	1.81938e-05	1	1	1	1		transposon%20protein%2C%20putative%2C%20CACTA%2C%20En%2FSpm%20sub-class%2C%20expressed
LOC_Os06g40490	Locus-imprinted PEG	1		PEG	-6.22009	3.79237	86.3635	1.49726e-20	2.23002e-18	0.02	0.0103093	0.0123457	0		PEG	-6.0636	5.18772	84.0714	4.77215e-20	7.88716e-18	0	0.0128755	0.0176	0.0430839		glycosyl hydrolases family 17, putative, expressed
LOC_Os06g45000	Locus-imprinted PEG	1		PEG	-2.12824	3.79404	18.9302	1.35589e-05	0.000415917	0.141026	0.169811	0.179191	0.213675		PEG	-1.9875	5.1512	24.9633	5.84309e-07	2.53303e-05	0.141631	0.166667	0.204918	0.260274		ubiquitin-conjugating enzyme, putative, expressed
LOC_Os06g45640	Allelic imprinted MEG	1		biallele	4.44918	3.19231	15.6749	7.52176e-05	0.00094496	0.6	1	1	1		MEG	3.66985	1.78521	21.8767	2.90743e-06	5.14316e-05	0.890909	0.882353	1	0.92		core histone H2A/H2B/H3/H4, putative, expressed
LOC_Os06g46435	Allelic imprinted MEG	0.150535		MEG	5.42937	0.324632	9.99744	0.00156758	0.0146806	1	1	1	1		biallele	4.36658	-0.478926	6.93577	0.00844888	0.0635887	1	1	1	1		NADPH-dependent oxidoreductase, putative, expressed
LOC_Os06g47290	Locus-imprinted PEG	1		PEG	-4.02376	2.41379	27.4418	1.61892e-07	6.76116e-06	0.0869565	0	0.0571429	0.0746269		PEG	-3.74423	3.04912	18.3519	1.83638e-05	0.000637286	0	0.0204082	0.211679	0.128571		growth regulator related protein, putative, expressed
LOC_Os06g47294	Allelic imprinted PEG	0.0518189		PEG	-2.88058	3.01584	15.0326	0.000105667	0.00289636	0.122449	0	0.178947	0.181818		biallele	-2.45123	3.33891	10.3765	0.00127632	0.0311931	0.0588235	0.0277778	0.380645	0.279503		methyltransferase, putative, expressed
LOC_Os06g48320	Allelic imprinted MEG	1		biallele	1.78419	7.40685	25.7261	3.93463e-07	7.67191e-06	0.669611	0.686259	0.79936	0.808244		MEG	1.6532	7.24666	17.5333	2.82325e-05	0.000395016	0.71475	0.709591	0.794168	0.709239		EDR2, putative, expressed
LOC_Os07g01450	Unclassified MEG	1		MEG	4.18144	3.48612	34.0943	5.25059e-09	1.4172e-07	0.901408	0.93617	0.948718	1		unknown	n.d.	n.d.	n.d.	n.d.	n.d.	n.d.	n.d.	n.d.	n.d.		DNA directed RNA polymerase, 7 kDa subunit domain containing protein, expressed
LOC_Os07g01900	Unclassified MEG	1		MEG	6.31802	0.775063	15.6546	7.60286e-05	0.000954178	1	1	1	1		unknown	n.d.	n.d.	n.d.	n.d.	n.d.	n.d.	n.d.	n.d.	n.d.		expressed protein
LOC_Os07g01940	Unclassified PEG	1		PEG	-3.09681	2.28512	17.2542	3.26972e-05	0.000962387	0.03125	0.142857	0.2	0.0461538		unknown	n.d.	n.d.	n.d.	n.d.	n.d.	n.d.	n.d.	n.d.	n.d.		sister chromatid cohesion 2, putative, expressed
LOC_Os07g04220	Allelic imprinted PEG	1		PEG	-2.77224	4.96127	30.4466	3.43181e-08	1.51514e-06	0.247148	0.197889	0.0619946	0.0570825		biallele	-1.84051	2.98669	7.75825	0.00534678	0.108595	0.0843373	0.207547	0.327103	0.16129		wound and phytochrome signaling involved receptor like kinase, putative, expressed
LOC_Os07g06610	Locus-imprinted PEG	1		PEG	-7.90212	3.15781	73.1685	1.19038e-17	1.40147e-15	0	0	0	0.0105263		PEG	-4.88973	2.95839	33.5452	6.96273e-09	4.10987e-07	0	0.0752688	0	0.0454545		ubiquitin carboxyl-terminal hydrolase domain containing protein, expressed
LOC_Os07g06980	Unclassified PEG	1		PEG	-3.53659	5.98413	65.1429	6.96605e-16	7.11689e-14	0.132075	0.0416069	0.0843707	0.0411568		unknown	n.d.	n.d.	n.d.	n.d.	n.d.	n.d.	n.d.	n.d.	n.d.		histone deacetylase, putative, expressed
LOC_Os07g08370	Allelic imprinted MEG	1		MEG	4.55645	2.69947	28.2086	1.0892e-07	2.34987e-06	1	1	0.972222	0.862069		biallele	3.19304	2.52522	7.15164	0.00748956	0.0571749	0.973154	0.875	0.428571	1		expressed protein
LOC_Os07g08880	Unclassified MEG	1		unknown	n.d.	n.d.	n.d.	n.d.	n.d.	n.d.	n.d.	n.d.	n.d.		MEG	1.67927	6.38728	26.243	3.01045e-07	6.61198e-06	0.747093	0.725587	0.746032	0.713383		ES43 protein, putative, expressed
LOC_Os07g09020	Unclassified MEG	1		unknown	n.d.	n.d.	n.d.	n.d.	n.d.	n.d.	n.d.	n.d.	n.d.		MEG	8.73513	2.63574	42.6536	6.53456e-11	2.68323e-09	1	1	1	1		argonaute, putative, expressed
LOC_Os07g11120	Unclassified MEG	1		MEG	4.69591	4.86992	52.3944	4.54018e-13	2.10999e-11	0.965583	1	0.848485	0.951417		unknown	n.d.	n.d.	n.d.	n.d.	n.d.	n.d.	n.d.	n.d.	n.d.		hydrolase, NUDIX family, domain containing protein, expressed
LOC_Os07g12260	Allelic imprinted MEG	1		biallele	8.23719	2.31687	27.7567	1.37572e-07	2.93218e-06	1	1	1	NA		MEG	8.52249	2.44749	43.4186	4.41957e-11	1.86695e-09	1	1	1	1		retrotransposon%20protein%2C%20putative%2C%20unclassified%2C%20expressed
LOC_Os07g12490	Locus-imprinted PEG	1		PEG	-5.90834	3.56076	67.2943	2.33857e-16	2.42936e-14	0.0167598	0	0.00662252	0.0253165		PEG	-6.98866	5.44741	115.6	5.81536e-27	1.50766e-24	0.00138313	0.00884956	0	0.0228311		KH domain containing protein, putative, expressed
LOC_Os07g12510	Allelic imprinted PEG	1		PEG	-2.5824	3.66859	28.8652	7.7594e-08	3.29628e-06	0.13	0.141243	0.142857	0.117117		biallele	-1.71373	2.75871	6.4132	0.0113275	0.214266	0.263158	0.43662	0.0535714	0.25		AP2 domain containing protein, expressed
LOC_Os07g12630	Locus-imprinted PEG	1		PEG	-2.00938	3.73001	16.8407	4.06524e-05	0.00118525	0.186992	0.279279	0.167883	0.138211		PEG	-2.35023	3.24234	16.7201	4.33185e-05	0.00139697	0.0851064	0.176471	0.224806	0.142857		transcription elongation factor protein, putative, expressed
LOC_Os07g17210	Locus-imprinted PEG	1		PEG	-5.13335	5.5392	27.8866	1.2864e-07	5.39065e-06	0.00713267	0	0.14578	0.0843882		PEG	-5.42835	5.0083	23.4899	1.25574e-06	5.17239e-05	0.00273973	0	0.0428571	0.141869		FAS1, putative, expressed
LOC_Os07g17300	Allelic imprinted MEG	1		MEG	2.76028	3.93501	27.3987	1.65539e-07	3.49214e-06	0.848214	0.762162	0.88	0.914894		biallele	1.45583	4.83212	6.21942	0.0126357	0.090996	0.482295	0.56044	0.848276	0.856115		expressed protein
LOC_Os07g17360	Locus-imprinted PEG	1		PEG	-2.38199	3.9699	23.342	1.35609e-06	4.81723e-05	0.243636	0.184615	0.0841121	0.106061		PEG	-2.33491	3.62976	20.5929	5.68066e-06	0.000217709	0.161765	0.207547	0.0871795	0.176471		transposon%20protein%2C%20putative%2C%20unclassified%2C%20expressed
LOC_Os07g17460	Locus-imprinted PEG	1		PEG	-5.8456	4.19658	46.5585	8.89235e-12	5.52398e-10	0	0	0.0531915	0.0526316		PEG	-7.84136	5.13523	171.614	3.2866e-39	3.06819e-36	0	0.002457	0.00744417	0.00767263		OsFBL36 - F-box domain and LRR containing protein, expressed
LOC_Os07g18720	Locus-imprinted PEG	1		PEG	-7.48859	2.74968	59.0373	1.54711e-14	1.30105e-12	0	0	0	0.0175439		PEG	-5.9039	3.00906	41.9398	9.41256e-11	6.87585e-09	0	0	0.0724638	0.0133333		tetratricopeptide repeat containing protein, putative, expressed
LOC_Os07g20110	Locus-imprinted MEG	1		MEG	7.89604	8.78139	177.858	1.4225e-40	6.76343e-38	0.997174	0.997936	0.990659	0.991446		MEG	7.11777	8.51498	85.566	2.24096e-20	2.71834e-18	0.996584	0.99672	0.988042	0.975996		expressed protein
LOC_Os07g27030	Allelic imprinted MEG	1		biallele	2.94038	1.43505	6.47823	0.0109204	0.081324	0.769231	0.466667	1	1		MEG	8.56693	2.47274	48.6092	3.12393e-12	1.5528e-10	1	1	1	1		OsFBX236 - F-box domain containing protein, expressed
LOC_Os07g27110	Locus-imprinted PEG	1		PEG	-4.69613	4.2543	75.6846	3.32791e-18	4.15551e-16	0.0334928	0.017341	0.0316742	0.0488599		PEG	-4.44059	4.36	49.7081	1.7841e-12	1.55193e-10	0.0198675	0.00591716	0.0867052	0.0851064		RNA recognition motif containing protein, expressed
LOC_Os07g27300	Locus-imprinted PEG	1		PEG	-3.95124	4.05946	41.6057	1.11666e-10	6.36137e-09	0.123894	0.111111	0.0105263	0.0299401		PEG	-1.52943	4.03714	11.3167	0.000768119	0.0195928	0.298462	0.214815	0.207373	0.253589		RNA-binding protein Luc7-like, putative, expressed
LOC_Os07g27450	Locus-imprinted PEG	0.29863		PEG	-6.04705	1.59336	26.6733	2.40932e-07	9.79736e-06	0.047619	0	0	0		PEG	-4.07496	3.00786	15.7869	7.08914e-05	0.00218491	0	0	0.232143	0.147287		expressed protein
LOC_Os07g32360	Locus-imprinted MEG	1		MEG	7.2424	1.46881	26.1141	3.21819e-07	6.37552e-06	1	1	1	1		MEG	7.55264	1.6101	34.3482	4.60826e-09	1.3921e-07	1	1	1	1		expressed protein
LOC_Os07g32370	Unclassified MEG	1		unknown	n.d.	n.d.	n.d.	n.d.	n.d.	n.d.	n.d.	n.d.	n.d.		MEG	6.48618	0.754064	20.7942	5.11384e-06	8.48372e-05	1	1	1	1		transposon%20protein%2C%20putative%2C%20unclassified%2C%20expressed
LOC_Os07g32412	Allelic imprinted PEG	1		PEG	-2.76149	3.81965	24.8716	6.12793e-07	2.30956e-05	0.0625	0.0762332	0.2	0.181287		biallele	-1.43674	2.67198	6.65543	0.00988542	0.190532	0.265823	0.283582	0.258427	0.219512		transposon%20protein%2C%20putative%2C%20unclassified%2C%20expressed
LOC_Os07g32450	Allelic imprinted PEG	1		PEG	-1.95772	4.67105	22.9271	1.68266e-06	5.94315e-05	0.245791	0.181818	0.180887	0.164557		biallele	-1.71921	4.64973	9.94365	0.00161405	0.0383831	0.441242	0.368	0.115607	0.0909091		protein kinase PKN/PRK1, effector, putative, expressed
LOC_Os07g32774	Locus-imprinted PEG	1		PEG	-2.15871	4.57262	21.5452	3.45588e-06	0.000116408	0.0967742	0.134328	0.206799	0.251613		PEG	-2.26707	5.14155	20.508	5.9382e-06	0.000226268	0.156202	0.13308	0.218241	0.122172		chorismate mutase/prephenate dehydratase, putative, expressed
LOC_Os07g34550	Locus-imprinted MEG	1		MEG	6.48322	0.924228	14.9672	0.000109398	0.00133109	1	1	1	1		MEG	8.91641	2.8068	56.1279	6.7908e-14	4.58102e-12	1	1	1	1		retrotransposon%20protein%2C%20putative%2C%20unclassified%2C%20expressed
LOC_Os07g34620	Locus-imprinted MEG	1		MEG	4.67559	6.18495	125.903	3.22903e-29	6.43826e-27	0.965596	0.93985	0.962804	0.957115		MEG	4.15949	6.48839	87.1284	1.01701e-20	1.33138e-18	0.961158	0.921569	0.907801	0.938119		expressed protein
LOC_Os07g38080	Locus-imprinted PEG	1		PEG	-2.61201	4.03375	24.7298	6.59578e-07	2.45593e-05	0.134948	0.0666667	0.139241	0.166667		PEG	-1.29173	5.03349	12.9975	0.000311908	0.00859177	0.272472	0.294118	0.286458	0.261111		homeodomain-like, putative, expressed
LOC_Os07g41650	Locus-imprinted MEG	1		MEG	6.95092	5.28366	120.513	4.88363e-28	8.87814e-26	0.984615	0.977376	1	1		MEG	7.99449	6.05609	183.022	1.06089e-41	1.27519e-38	0.985899	1	1	0.998022		pectinesterase, putative, expressed
LOC_Os07g42390	Allelic imprinted MEG	1		biallele	-0.379205	7.60399	1.10276	0.293661	0.948553	0.31988	0.346037	0.469352	0.43824		MEG	6.63159	4.5705	101.604	6.77958e-24	1.13468e-21	0.991597	0.986486	0.982533	1		DUF581 domain containing protein, expressed
LOC_Os07g42770	Locus-imprinted PEG	0.10938		PEG	-4.41734	3.16843	30.6701	3.05839e-08	1.36e-06	0.0288462	0	0.107143	0.0638298		PEG	-4.96947	4.08982	29.7049	5.03073e-08	2.59829e-06	0.00775194	0	0.0285714	0.174603		CAMK CAMK like.35 - CAMK includes calcium/calmodulin depedent protein kinases, expressed
LOC_Os07g43160	Allelic imprinted PEG	1		PEG	-2.47233	5.9015	36.9695	1.19991e-09	6.20639e-08	0.123853	0.174312	0.119403	0.190789		biallele	-1.96336	6.97589	13.2952	0.000266091	0.00746975	0.138914	0.154989	0.179577	0.336296		uncharacterized glycosyl hydrolase Rv2006/MT2062, putative, expressed
LOC_Os07g45070	Allelic imprinted PEG	1		PEG	-1.67521	4.13874	12.6981	0.000366018	0.00927196	0.190789	0.234043	0.269565	0.229508		biallele	-1.94453	5.39425	20.196	6.99006e-06	0.000263312	0.107463	0.154812	0.313684	0.248299		FAT domain-containing protein, putative, expressed
LOC_Os07g45400	Allelic imprinted PEG	1		PEG	-5.0952	7.3869	49.3296	2.16378e-12	1.49434e-10	0.0612583	0.00167785	0.0366714	0.0108747		biallele	-2.50406	5.99857	17.3952	3.03592e-05	0.00100857	0.0391909	0.0685579	0.282096	0.353457		expressed protein
LOC_Os07g48160	Allelic imprinted PEG	0.149237		PEG	-5.13451	1.86344	21.2245	4.08514e-06	0.000134668	0	0	0.0566038	0.0666667		biallele	-2.92875	1.09278	5.70912	0.016877	0.301551	0	0	0.0833333	0.483871		alpha-galactosidase precursor, putative, expressed
LOC_Os07g48170	Locus-imprinted PEG	1		PEG	-12.253	6.06008	244.601	3.90415e-55	1.20658e-51	0	0	0	0		PEG	-7.29872	5.81536	140.082	2.55444e-32	1.12583e-29	0.00831025	0.00966184	0	0.00491228		nucleotidyltransferase, putative, expressed
LOC_Os07g48180	Locus-imprinted PEG	0.201252		PEG	-4.0505	5.01017	89.2163	3.53925e-21	5.6821e-19	0.0603015	0.0663507	0.0561056	0.0332594		PEG	-3.73504	3.42241	22.3501	2.27198e-06	9.02104e-05	0.13253	0.126761	0	0.0486891		bZIP transcription factor domain containing protein, expressed
LOC_Os07g48229	Allelic imprinted PEG	1		biallele	-1.27656	2.8289	3.30983	0.0688668	0.877661	0.223022	0.10559	0.6	0.37931		PEG	-2.0557	2.45092	10.4324	0.00123825	0.0303187	0.217391	0.09375	0.125	0.287671		vacuolar-sorting receptor precursor, putative, expressed
LOC_Os07g48400	Locus-imprinted MEG	1		MEG	10.8492	4.82328	152.832	4.16807e-35	1.28814e-32	1	1	1	1		MEG	11.4306	5.20205	191.728	1.3341e-43	2.20494e-40	1	1	1	1		retrotransposon%20protein%2C%20putative%2C%20unclassified%2C%20expressed
LOC_Os08g01040	Locus-imprinted PEG	0.144148		PEG	-4.61941	2.17306	21.3416	3.84298e-06	0.000127843	0.0454545	0	0.0689655	0		PEG	-5.80914	3.45714	63.6178	1.51061e-15	1.78333e-13	0.0108696	0.015873	0	0.0331126		zinc finger, C3HC4 type domain containing protein, expressed
LOC_Os08g01054	Locus-imprinted PEG	1		PEG	-7.17766	5.9677	169.12	1.15182e-38	5.47648e-36	0.00938086	0	0.00639659	0.00795756		PEG	-6.35572	6.76533	85.2229	2.66561e-20	4.57723e-18	0.010101	0	0.017871	0.0268493		retrotransposon%20protein%2C%20putative%2C%20unclassified%2C%20expressed
LOC_Os08g01570	Locus-imprinted MEG	1		MEG	5.84459	4.13045	52.8489	3.60218e-13	1.69316e-11	1	0.898876	1	1		MEG	8.1116	4.49684	115.546	5.97559e-27	1.25411e-24	0.991266	1	1	1		retrotransposon%20protein%2C%20putative%2C%20unclassified%2C%20expressed
LOC_Os08g01900	Allelic imprinted PEG	1		PEG	-2.51269	5.39558	44.0196	3.25112e-11	1.96051e-09	0.152104	0.153005	0.160656	0.100457		biallele	-1.58821	6.59889	16.1497	5.85268e-05	0.0018381	0.348219	0.319471	0.168654	0.158177		armadillo/beta-catenin repeat family protein, putative, expressed
LOC_Os08g03470	Unclassified MEG	1		unknown	n.d.	n.d.	n.d.	n.d.	n.d.	n.d.	n.d.	n.d.	n.d.		MEG	6.81329	4.12739	98.0361	4.10828e-23	6.54455e-21	1	1	0.982833	0.979899		MBTB15 - Bric-a-Brac, Tramtrack, Broad Complex BTB domain with Meprin and TRAF Homology MATH domain, expressed
LOC_Os08g04290	Locus-imprinted MEG	1		MEG	5.99918	4.3041	68.5821	1.21702e-16	8.64375e-15	0.954198	1	0.994652	0.978142		MEG	7.88203	4.88982	146.341	1.09364e-33	4.5188e-31	1	0.986063	1	0.992248		WD domain, G-beta repeat domain containing protein, expressed
LOC_Os08g06330	Locus-imprinted MEG	1		MEG	2.77266	6.38046	57.757	2.96582e-14	1.61513e-12	0.795556	0.815296	0.885463	0.889377		MEG	3.04002	5.44835	60.3497	7.94173e-15	6.1768e-13	0.856115	0.865633	0.911111	0.864407		zinc finger C-x8-C-x5-C-x3-H type family protein, expressed
LOC_Os08g08000	Locus-imprinted PEG	1		PEG	-5.67893	3.50042	64.8606	8.03888e-16	8.0794e-14	0.008	0	0.0252101	0.0326087		PEG	-4.66287	4.34416	63.9891	1.25108e-15	1.49025e-13	0.0143266	0.0217391	0.0340136	0.0888889		DNA binding protein, putative, expressed
LOC_Os08g08960	Locus-imprinted MEG	0.0128562		MEG	4.37057	1.3086	15.0232	0.000106198	0.00129342	1	1	0.998441	0.998664		MEG	5.71274	2.61925	31.3627	2.14051e-08	5.7524e-07	1	0.998321	0.999452	1		Cupin domain containing protein, expressed
LOC_Os08g09700	Locus-imprinted MEG	1		MEG	7.62907	6.72371	245.885	2.04888e-55	3.16603e-52	0.990506	1	0.992556	0.992647		MEG	5.84553	8.49811	29.8974	4.55519e-08	1.17405e-06	0.997526	0.997581	0.890139	0.88561		OsFBX270 - F-box domain containing protein, expressed
LOC_Os08g12750	Allelic imprinted PEG	1		PEG	-4.50328	4.15359	56.2351	6.43049e-14	5.06329e-12	0.0592885	0.014218	0.0521739	0.0181818		biallele	-0.761682	3.69782	0.0049095	0.94414	1	1	1	0	0		serine/threonine-protein kinase HT1, putative, expressed
LOC_Os08g13110	Allelic imprinted PEG	1		biallele	-6.92998	1.26298	19.5514	9.79298e-06	0.000308043	0	NA	0	0		PEG	-6.32479	1.44776	28.648	8.68033e-08	4.33099e-06	0.0153846	0	0	0		hypothetical protein
LOC_Os08g13350	Locus-imprinted PEG	1		PEG	-6.01743	5.63097	141.841	1.05335e-32	3.25538e-30	0.0230303	0.0083682	0.0229008	0.00621118		PEG	-4.55965	5.48408	73.4519	1.03117e-17	1.40559e-15	0.0985222	0.0544218	0.0151976	0.0213592		expressed protein
LOC_Os08g15840	Allelic imprinted MEG	1		MEG	2.57707	6.77736	63.8782	1.32352e-15	8.22176e-14	0.814516	0.798077	0.857288	0.862069		biallele	2.00427	6.86931	21.5524	3.44289e-06	5.97399e-05	0.829916	0.88015	0.708243	0.659923		ankyrin repeat-rich protein, putative, expressed
LOC_Os08g19590	Allelic imprinted MEG	1		MEG	3.81929	5.73921	66.7246	3.1222e-16	2.06399e-14	0.964	0.930207	0.876923	0.89418		biallele	1.76754	6.52336	1.72058	0.189618	0.867468	0.96475	0.977695	0.221477	0.220068		Homeobox domain containing protein, expressed
LOC_Os08g23580	Unclassified MEG	1		MEG	7.61967	1.98498	23.7469	1.09875e-06	1.98578e-05	1	1	1	1		unknown	n.d.	n.d.	n.d.	n.d.	n.d.	n.d.	n.d.	n.d.	n.d.		transposon%20protein%2C%20putative%2C%20CACTA%2C%20En%2FSpm%20sub-class%2C%20expressed
LOC_Os08g23590	Allelic imprinted MEG	1		MEG	8.49502	2.59682	50.9691	9.38329e-13	4.19832e-11	1	1	1	1		biallele	3.41318	0.700079	4.5586	0.0327538	0.208608	1	1	0	NA		ankyrin repeat domain containing protein, expressed
LOC_Os08g24400	Locus-imprinted PEG	1		PEG	-6.56915	4.35308	95.1001	1.81001e-22	3.15147e-20	0.0108696	0	0	0.0218341		PEG	-4.25701	3.92087	24.6927	6.72367e-07	2.88638e-05	0.140845	0.153285	0	0.0185874		SWP, putative, expressed
LOC_Os08g24420	Locus-imprinted PEG	1		PEG	-7.15206	6.09457	190.069	3.07058e-43	2.10881e-40	0.0148148	0.00378788	0.00540541	0.00136054		PEG	-4.48656	6.21959	31.001	2.57889e-08	1.41486e-06	0.157681	0.147541	0.00380228	0.0124224		SWP, putative, expressed
LOC_Os08g24946	Allelic imprinted PEG	1		PEG	-1.23976	5.51064	12.4237	0.000423918	0.0105655	0.287958	0.285246	0.278689	0.274463		biallele	-0.743528	5.88729	4.95325	0.0260417	0.432025	0.342742	0.320557	0.419786	0.362637		EDM2, putative, expressed
LOC_Os08g27240	Locus-imprinted PEG	1		PEG	-3.69115	4.90679	63.2918	1.78243e-15	1.69495e-13	0.0594059	0.0351438	0.0939759	0.0893971		PEG	-4.57352	5.55741	91.63	1.04494e-21	1.94595e-19	0.0227273	0.0226244	0.0345572	0.0739958		ARID/BRIGHT DNA-binding domain containing protein, expressed
LOC_Os08g27860	Locus-imprinted PEG	1		PEG	-3.48175	4.57622	47.519	5.44722e-12	3.50721e-10	0.0491803	0.135314	0.0656934	0.0523077		PEG	-2.48776	4.81306	34.4008	4.48534e-09	2.708e-07	0.149206	0.0989011	0.118457	0.220217		EARLY flowering protein, putative, expressed
LOC_Os08g27870	Locus-imprinted MEG	1		MEG	8.20505	4.72944	127.657	1.33395e-29	2.74839e-27	0.989189	1	1	1		MEG	11.1205	4.89591	168.077	1.94612e-38	1.28658e-35	1	1	1	1		EARLY flowering protein, putative, expressed
LOC_Os08g28010	Allelic imprinted MEG	1		biallele	1.31225	1.78238	1.54449	0.213951	0.846627	0.35	0.555556	1	0.9		MEG	2.99315	1.71416	13.8733	0.000195555	0.00226992	0.860465	0.772727	0.923077	1		expressed protein
LOC_Os08g28170	Allelic imprinted MEG	1		MEG	2.36534	5.08067	25.5583	4.29208e-07	8.32947e-06	0.898876	0.84	0.737991	0.79		biallele	1.83125	5.39718	11.718	0.00061898	0.00634923	0.639723	0.832461	0.778102	0.855769		nucleobase-ascorbate transporter, putative, expressed
LOC_Os08g28940	Allelic imprinted MEG	1		MEG	7.42387	6.01905	197.061	9.14495e-45	5.13863e-42	0.996466	0.990654	0.993186	0.99449		biallele	2.95451	5.00724	3.79283	0.0514725	0.30935	0.990826	1	0.350588	0.351562		OsFBX289 - F-box domain containing protein, expressed
LOC_Os08g28960	Locus-imprinted MEG	1		MEG	6.21244	5.39498	92.5679	6.5053e-22	7.31077e-20	0.953975	0.975567	1	1		MEG	6.6728	5.81173	122.546	1.75328e-28	4.37393e-26	1	0.995455	0.971903	0.982906		expressed protein
LOC_Os08g29520	Allelic imprinted PEG	1		PEG	-3.16283	2.8015	19.3132	1.10938e-05	0.000344577	0.146667	0.225	0.027027	0.0416667		biallele	-1.51905	3.45742	2.7598	0.0966606	1	0.7	0.516667	0.0441176	0.08		cytochrome b561, putative, expressed
LOC_Os08g29580	Allelic imprinted MEG	1		biallele	5.26057	0.23721	6.38375	0.011517	0.0850496	1	1	NA	NA		MEG	7.91328	1.92648	35.4731	2.586e-09	8.25896e-08	1	1	1	1		expressed protein
LOC_Os08g35050	Locus-imprinted PEG	0.244719		PEG	-6.7277	6.30197	156.702	5.94644e-36	2.31535e-33	0.00888585	0.00112994	0.0210526	0.0126582		PEG	-5.7985	6.45582	103.214	3.00897e-24	6.41687e-22	0.0108108	0.00996678	0.0140845	0.0354458		ARID/BRIGHT DNA-binding domain containing protein, expressed
LOC_Os08g38850	Unclassified MEG	0.167977		unknown	n.d.	n.d.	n.d.	n.d.	n.d.	n.d.	n.d.	n.d.	n.d.		MEG	4.90122	3.7605	58.3731	2.16841e-14	1.57531e-12	0.984479	0.997509	0.993464	0.996627		phosphatidylinositol transfer, putative, expressed
LOC_Os08g40620	Locus-imprinted PEG	1		PEG	-3.29469	5.42605	63.6912	1.45532e-15	1.39462e-13	0.102941	0.0796117	0.113846	0.0640669		PEG	-2.36039	3.18449	17.3037	3.1856e-05	0.001053	0.192982	0.0857143	0.12782	0.196429		rabGAP/TBC domain-containing protein, putative, expressed
LOC_Os08g40820	Unclassified PEG	1		PEG	-4.90613	3.45208	38.6295	5.12392e-10	2.71853e-08	0.0930233	0	0.0365854	0		unknown	n.d.	n.d.	n.d.	n.d.	n.d.	n.d.	n.d.	n.d.	n.d.		expressed protein
LOC_Os08g41700	Locus-imprinted PEG	1		PEG	-7.82432	3.12725	69.2598	8.63106e-17	9.27801e-15	0	0	0	0.0123457		PEG	-6.62625	2.45439	54.1816	1.82792e-13	1.76414e-11	0	0.0232558	0	0.00990099		expressed protein
LOC_Os08g41710	Locus-imprinted PEG	1		PEG	-7.5227	6.27656	261.664	7.44521e-59	9.20377e-55	0.00545455	0.00516351	0.00124224	0.00769231		PEG	-5.69728	6.02877	141.511	1.24418e-32	6.09282e-30	0.0180587	0.0163934	0.00676329	0.0311203		FHA domain containing protein, putative, expressed
LOC_Os08g41790	Unclassified PEG	1		unknown	n.d.	n.d.	n.d.	n.d.	n.d.	n.d.	n.d.	n.d.	n.d.		PEG	-4.93307	3.21655	44.1453	3.04888e-11	2.33019e-09	0.010989	0.0656934	0.0114943	0.025		phosphoribulokinase/Uridine kinase family protein, expressed
LOC_Os08g42350	Allelic imprinted MEG	0.0330097		biallele	4.35596	-0.343403	6.40266	0.011395	0.0842996	1	1	1	1		MEG	6.42534	0.837273	13.1184	0.000292412	0.00322997	1	1	1	1		nodulin MtN3 family protein, putative, expressed
LOC_Os08g42640	Locus-imprinted PEG	1		PEG	-3.57899	3.95438	36.8011	1.30816e-09	6.73811e-08	0.0327869	0.0379747	0.115044	0.142857		PEG	-3.09808	3.5324	18.7524	1.48839e-05	0.000527599	0.0348259	0.0379747	0.297297	0.147287		zinc finger, C3HC4 type domain containing protein, expressed
LOC_Os08g42980	Locus-imprinted PEG	1		PEG	-4.1687	2.65007	32.6995	1.07566e-08	4.99897e-07	0.121951	0.015873	0.0392157	0.0379747		PEG	-3.55272	6.34334	71.2065	3.21724e-17	4.25383e-15	0.0700086	0.0402844	0.11129	0.0888681		la domain containing protein, expressed
LOC_Os08g44170	Locus-imprinted MEG	1		MEG	6.15184	0.659024	14.8412	0.000116951	0.00141186	1	1	1	1		MEG	7.32577	1.40553	31.4527	2.04359e-08	5.51436e-07	1	1	1	1		transposon%20protein%2C%20putative%2C%20unclassified%2C%20expressed
LOC_Os08g45130	Unclassified PEG	1		unknown	n.d.	n.d.	n.d.	n.d.	n.d.	n.d.	n.d.	n.d.	n.d.		PEG	-3.48362	1.7792	19.2673	1.13636e-05	0.0004094	0.0645161	0	0.0588235	0.212121		histone-lysine N-methyltransferase, putative, expressed
LOC_Os09g01790	Allelic imprinted MEG	1		biallele	5.9082	0.637439	7.95494	0.00479564	0.0396016	1	NA	1	1		MEG	8.10149	2.09465	43.5676	4.09568e-11	1.74126e-09	1	1	1	1		expressed protein
LOC_Os09g02690	Locus-imprinted MEG	1		MEG	8.38766	5.09036	148.998	2.87005e-34	8.06352e-32	0.992395	1	1	0.995423		MEG	11.4773	5.26187	179.245	7.08232e-41	6.24283e-38	1	1	1	1		expressed protein
LOC_Os09g03090	Locus-imprinted PEG	1		PEG	-5.59538	5.74454	125.888	3.25334e-29	8.55698e-27	0.012848	0.00846433	0.0211765	0.0393701		PEG	-6.20074	5.67968	112.375	2.95674e-26	6.98107e-24	0.00540541	0.00515464	0.020339	0.0290909		expressed protein
LOC_Os09g03500	Locus-imprinted MEG	1		MEG	8.23446	5.68097	176.517	2.79258e-40	1.23293e-37	0.988909	0.996855	1	1		MEG	8.44537	5.68448	166.968	3.40039e-38	2.04363e-35	0.989404	1	1	1		ZOS9-01 - C2H2 zinc finger protein, expressed
LOC_Os09g06230	Allelic imprinted PEG	1		biallele	-2.39056	2.13991	8.53315	0.00348736	0.0719711	0.255814	0.137255	0.215686	0		PEG	-2.22294	4.12553	22.0265	2.68918e-06	0.000105508	0.16041	0.163043	0.106227	0.28655		serine/threonine-protein kinase 16, putative, expressed
LOC_Os09g06910	Unclassified MEG	1		unknown	n.d.	n.d.	n.d.	n.d.	n.d.	n.d.	n.d.	n.d.	n.d.		MEG	7.22997	1.32383	30.3669	3.57575e-08	9.34359e-07	1	1	1	1		retrotransposon%20protein%2C%20putative%2C%20unclassified%2C%20expressed
LOC_Os09g06950	Unclassified MEG	1		unknown	n.d.	n.d.	n.d.	n.d.	n.d.	n.d.	n.d.	n.d.	n.d.		MEG	8.92048	2.80463	60.5169	7.29477e-15	5.71234e-13	1	1	1	1		expressed protein
LOC_Os09g07940	Locus-imprinted MEG	1		MEG	7.92564	2.06686	38.1106	6.68476e-10	2.0711e-08	1	1	1	1		MEG	7.68157	1.69468	31.2809	2.23265e-08	5.98784e-07	1	1	1	1		retrotransposon%20protein%2C%20putative%2C%20unclassified%2C%20expressed
LOC_Os09g10330	Locus-imprinted MEG	1		MEG	8.2076	5.22699	155.921	8.80917e-36	2.79228e-33	0.996885	0.991543	1	1		MEG	10.7857	4.58602	91.8307	9.44199e-22	1.32811e-19	1	1	1	1		expressed protein
LOC_Os09g11380	Allelic imprinted MEG	1		biallele	5.78638	2.04029	18.6554	1.566e-05	0.000225628	NA	1	1	0.971831		MEG	8.52085	2.51363	40.9767	1.54057e-10	5.97345e-09	1	1	1	1		expressed protein
LOC_Os09g11760	Locus-imprinted PEG	1		PEG	-3.75332	1.97758	11.6851	0.00063004	0.0153318	0.0263158	0	0	0.2		PEG	-4.02798	1.96631	15.5378	8.08734e-05	0.00247525	0	0.0117647	0.135135	0.151515		expressed protein
LOC_Os09g14680	Unclassified PEG	1		unknown	n.d.	n.d.	n.d.	n.d.	n.d.	n.d.	n.d.	n.d.	n.d.		PEG	-4.9882	3.6	53.0942	3.17936e-13	3.00268e-11	0.0106383	0.0555556	0.00787402	0.0337079		expressed protein
LOC_Os09g16520	Locus-imprinted PEG	0.19601		PEG	-5.32796	3.70611	61.9494	3.52388e-15	3.27536e-13	0.00854701	0.0569106	0.00436681	0.0285714		PEG	-5.82022	3.59055	64.8916	7.9132e-16	9.68781e-14	0.00961538	0.0291262	0.00763359	0.0136986		cytochrome b5-like Heme/Steroid binding domain containing protein, expressed
LOC_Os09g20010	Locus-imprinted PEG	1		PEG	-3.47103	4.17163	53.0396	3.26892e-13	2.43436e-11	0.0727273	0.0614525	0.0990991	0.07173		PEG	-3.12072	4.71735	49.9145	1.60596e-12	1.40622e-10	0.0916667	0.0656934	0.0861619	0.166667		SNF1-related protein kinase regulatory subunit beta-2, putative, expressed
LOC_Os09g20340	Unclassified PEG	1		unknown	n.d.	n.d.	n.d.	n.d.	n.d.	n.d.	n.d.	n.d.	n.d.		PEG	-1.81648	6.89692	19.5172	9.96987e-06	0.000362147	0.163482	0.163851	0.293132	0.234854		DUF630/DUF632 domains containing protein, putative, expressed
LOC_Os09g20650	Locus-imprinted PEG	1		PEG	-3.24195	4.54856	19.0738	1.25763e-05	0.0003877	0.0758621	0	0.210728	0.144737		PEG	-3.8034	3.98222	30.3272	3.64963e-08	1.93022e-06	0.189369	0.0157068	0.0201342	0.0490196		OsFBX323 - F-box domain containing protein, expressed
LOC_Os09g23690	Allelic imprinted PEG	1		PEG	-1.7189	3.46	9.88327	0.00166788	0.0372172	0.198238	0.120567	0.275	0.294118		biallele	-1.30631	4.4058	9.13534	0.00250719	0.0557144	0.287449	0.263598	0.262136	0.298246		UBX domain containing protein, expressed
LOC_Os09g24290	Allelic imprinted MEG	1		MEG	3.30407	7.28072	67.9372	1.68789e-16	1.15921e-14	0.823789	0.851613	0.927052	0.932607		biallele	1.29748	8.72253	5.84069	0.0156597	0.109668	0.674067	0.70831	0.625805	0.689742		agenet domain-containing protein, putative, expressed
LOC_Os09g25160	Unclassified MEG	1		unknown	n.d.	n.d.	n.d.	n.d.	n.d.	n.d.	n.d.	n.d.	n.d.		MEG	8.4818	2.39879	51.0041	9.2171e-13	5.04814e-11	1	1	1	1		retrotransposon%20protein%2C%20putative%2C%20unclassified%2C%20expressed
LOC_Os09g25170	Unclassified MEG	1		unknown	n.d.	n.d.	n.d.	n.d.	n.d.	n.d.	n.d.	n.d.	n.d.		MEG	8.00754	2.01177	36.5391	1.49635e-09	4.95858e-08	1	1	1	1		retrotransposon%20protein%2C%20putative%2C%20unclassified%2C%20expressed
LOC_Os09g26470	Locus-imprinted MEG	1		MEG	7.46483	1.66707	25.7159	3.95552e-07	7.70049e-06	1	1	1	1		MEG	6.8655	2.68528	49.7277	1.76635e-12	9.23107e-11	1	1	0.962264	1		zinc finger, C3HC4 type family protein, expressed
LOC_Os09g28940	Locus-imprinted PEG	1		PEG	-6.7642	2.69845	53.1217	3.13512e-13	2.34887e-11	0.0263158	0	0	0		PEG	-4.33325	3.27443	35.7202	2.27792e-09	1.41402e-07	0.0140845	0.0786517	0.00869565	0.0666667		ubiquitin carboxyl-terminal hydrolase domain containing protein, expressed
LOC_Os09g32210	Allelic imprinted MEG	1		biallele	1.1108	8.00721	7.99455	0.00469184	0.0389527	0.571019	0.63072	0.690821	0.68937		MEG	2.03982	7.71594	16.9807	3.77614e-05	0.000515787	0.89186	0.7666	0.764151	0.735828		pumilio-family RNA binding repeat containing protein, expressed
LOC_Os09g32750	Locus-imprinted PEG	1		PEG	-3.46256	3.43222	24.4089	7.79068e-07	2.83915e-05	0.0676692	0	0.15942	0.0884354		PEG	-3.00524	3.70434	16.0187	6.27185e-05	0.00196508	0.0162162	0.0714286	0.0894309	0.278481		FHA domain containing protein, putative, expressed
LOC_Os09g34880	Locus-imprinted MEG	1		MEG	10.0468	3.99837	103.69	2.36589e-24	3.36174e-22	1	1	1	1		MEG	10.2409	4.04099	110.098	9.3275e-26	1.76183e-23	1	1	1	1		basic region leucine zipper domain containing protein, expressed
LOC_Os09g34950	Locus-imprinted PEG	1		PEG	-4.16228	1.85705	19.9055	8.13655e-06	0.000261257	0.111111	0	0.0526316	0.0285714		PEG	-3.90193	2.47451	15.7405	7.26511e-05	0.00223394	0	0.2	0	0.0606061		TCP family transcription factor, putative, expressed
LOC_Os09g35830	Unclassified PEG	0.282754		PEG	-3.62937	1.43952	12.6549	0.00037458	0.00946945	0.0810811	0	0.0588235	0.2		unknown	n.d.	n.d.	n.d.	n.d.	n.d.	n.d.	n.d.	n.d.	n.d.		RNA recognition motif containing protein, putative, expressed
LOC_Os09g35850	Unclassified PEG	1		PEG	-6.29098	2.71023	50.4846	1.20104e-12	8.58226e-11	0	0	0.0344828	0.0144928		unknown	n.d.	n.d.	n.d.	n.d.	n.d.	n.d.	n.d.	n.d.	n.d.		RNA recognition motif containing protein, putative, expressed
LOC_Os09g36470	Locus-imprinted MEG	1		MEG	5.32274	2.40956	29.4605	5.70676e-08	1.29048e-06	1	0.888889	1	1		MEG	7.55166	1.5918	31.7552	1.74881e-08	4.73826e-07	1	1	1	1		retrotransposon%20protein%2C%20putative%2C%20unclassified%2C%20expressed
LOC_Os09g36970	Locus-imprinted MEG	1		MEG	8.34378	2.40505	39.8346	2.76412e-10	9.01584e-09	1	1	1	1		MEG	7.65216	1.68643	35.1391	3.06981e-09	9.71028e-08	1	1	1	1		expressed protein
LOC_Os10g01380	Locus-imprinted MEG	1		MEG	4.8771	3.61613	26.5847	2.52232e-07	5.12002e-06	1	1	0.960784	0.814815		MEG	6.33666	3.30288	58.8915	1.66613e-14	1.23762e-12	1	1	1	0.952		CW7, putative, expressed
LOC_Os10g01480	Locus-imprinted PEG	1		PEG	-4.30843	5.88408	92.1798	7.91473e-22	1.32219e-19	0.033877	0.0733138	0.0398614	0.0278293		PEG	-4.9046	6.89285	56.8771	4.63922e-14	4.75502e-12	0.00758098	0.0698975	0.0152185	0.0293123		Inositol 1, 3, 4-trisphosphate 5/6-kinase, putative, expressed
LOC_Os10g03870	Unclassified MEG	1		unknown	n.d.	n.d.	n.d.	n.d.	n.d.	n.d.	n.d.	n.d.	n.d.		MEG	4.73854	2.24698	33.1187	8.67005e-09	2.4975e-07	0.972222	1	0.935484	0.945946		OsFBX353 - F-box domain containing protein, expressed
LOC_Os10g04600	Allelic imprinted PEG	1		biallele	-0.845625	1.43114	1.1387	0.285927	1	0.333333	0.466667	0.290323	0.333333		PEG	-2.02051	2.54217	11.1202	0.000853924	0.0216295	0.214286	0.22807	0.125	0.1875		OsFBX359 - F-box domain containing protein, expressed
LOC_Os10g04610	Unclassified PEG	1		PEG	-4.61915	0.965119	12.1932	0.000479631	0.0118584	0.0810811	0	0	0		unknown	n.d.	n.d.	n.d.	n.d.	n.d.	n.d.	n.d.	n.d.	n.d.		OsFBX360 - F-box domain containing protein, expressed
LOC_Os10g04890	Locus-imprinted PEG	1		PEG	-5.86455	5.75848	92.416	7.02423e-22	1.1895e-19	0.0294118	0.0491803	0.00380228	0.00603969		PEG	-7.23707	6.37991	115.523	6.04646e-27	1.53743e-24	0.0187192	0.0128866	0	0.004		expressed protein
LOC_Os10g04900	Locus-imprinted PEG	1		PEG	-7.70421	6.62492	217.784	2.75293e-49	3.09379e-46	0.00143885	0.00191205	0.0115533	0.00582848		PEG	-10.0724	6.30458	206.718	7.1426e-47	3.14798e-43	0	0.00140647	0	0.00161812		OsFBX364 - F-box domain containing protein, expressed
LOC_Os10g04980	Locus-imprinted PEG	1		PEG	-6.66213	6.69378	149.428	2.31158e-34	7.9377e-32	0.00116959	0.00590939	0.0181504	0.0132626		PEG	-8.27166	5.7508	180.977	2.96586e-41	3.92146e-38	0	0	0.00595948	0.00557103		OsFBX365 - F-box domain containing protein, expressed
LOC_Os10g05500	Locus-imprinted PEG	1		PEG	-7.32659	1.37638	25.8968	3.60169e-07	1.41797e-05	0	0	0	0		PEG	-7.11372	2.23538	46.7763	7.95713e-12	6.4152e-10	0	0.0222222	0	0		OsFBX370 - F-box domain containing protein, expressed
LOC_Os10g05520	Unclassified PEG	1		unknown	n.d.	n.d.	n.d.	n.d.	n.d.	n.d.	n.d.	n.d.	n.d.		PEG	-8.65275	2.39089	62.4741	2.69972e-15	3.10397e-13	0	0	0	0		OsFBX371 - F-box domain containing protein, expressed
LOC_Os10g05530	Unclassified PEG	1		unknown	n.d.	n.d.	n.d.	n.d.	n.d.	n.d.	n.d.	n.d.	n.d.		PEG	-4.73671	0.77564	17.2049	3.35565e-05	0.00110095	0.0222222	0	0.111111	0		OsFBX372 - F-box domain containing protein, expressed
LOC_Os10g05750	Allelic imprinted MEG	0.0139297		biallele	3.0428	-0.763389	2.88132	0.0896125	0.488859	1	1	1	1		MEG	5.27828	0.011559	9.42749	0.00213756	0.0190066	1	1	1	1		POEI3 - Pollen Ole e I allergen and extensin family protein precursor, expressed
LOC_Os10g05800	Allelic imprinted PEG	1		PEG	-2.36537	5.53761	23.6463	1.15767e-06	4.14815e-05	0.122047	0.0514019	0.222037	0.261868		biallele	-1.52457	6.26235	3.60771	0.0575123	0.79793	0.0832073	0.0530973	0.591603	0.583826		F-box protein family, AtFBL4, putative, expressed
LOC_Os10g06000	Allelic imprinted MEG	0.0244768		biallele	2.52109	-0.866342	2.05126	0.15208	0.704652	1	1	1	1		MEG	5.11886	-0.0277793	7.82403	0.0051556	0.0410647	1	1	1	1		POEI15 - Pollen Ole e I allergen and extensin family protein precursor, expressed
LOC_Os10g11260	Locus-imprinted PEG	1		PEG	-3.52388	2.62531	25.7985	3.78991e-07	1.48733e-05	0.16129	0.0697674	0.0612245	0.0384615		PEG	-4.08366	3.09586	26.973	2.06319e-07	9.60545e-06	0.0357143	0	0.107692	0.111111		ubiquitin-conjugating enzyme, putative, expressed
LOC_Os10g11580	Allelic imprinted MEG	1		biallele	1.63034	9.11073	9.13954	0.00250145	0.0222627	0.539826	0.559075	0.856692	0.842449		MEG	4.87428	9.43298	54.4608	1.5858e-13	1.01784e-11	0.982276	0.975632	0.947278	0.920134		histone-like transcription factor and archaeal histone, putative, expressed
LOC_Os10g13460	Locus-imprinted MEG	1		MEG	7.71708	1.92335	34.3224	4.66965e-09	1.26871e-07	1	1	1	1		MEG	8.17319	2.15748	43.5983	4.03194e-11	1.71969e-09	1	1	1	1		hypothetical protein
LOC_Os10g21418	Unclassified MEG	0.109243		MEG	4.87987	-0.0993245	8.25299	0.0040685	0.0341909	1	1	1	1		unknown	n.d.	n.d.	n.d.	n.d.	n.d.	n.d.	n.d.	n.d.	n.d.		NADPH-dependent oxidoreductase, putative, expressed
LOC_Os10g22980	Allelic imprinted MEG	1		MEG	3.66415	4.7038	26.2378	3.01853e-07	5.9992e-06	0.966292	1	0.812298	0.747312		biallele	0.205844	4.95526	0.113672	0.736002	1	0.330097	0.256098	0.686636	0.719298		leucine rich repeat domain containing protein, putative, expressed
[truncated: 88 more rows]

## Sheet: 7 DAP embryo
Supplementary Data 2. List of statical test and maternal rate of imprinted genes in F1 endosperm and embryo
[truncated: 13 more rows]
