# Supplementary material for: Multi-layered epigenetic control of persistent and stage-specific imprinted genes in rice endosperm
Source: Research Square preprint supplement (doi:10.21203/rs.3.rs-2403620/v1), 2023-01-11
Supplement: Supplementary file 7 [file Supplementary Data 3.xlsx]

## Sheet: MEGs
Supplementary Data 3. List of imprint classes for MEGs and PEGs.
locus name	Imprint class		Type of imprinting				MSU annotaion
			3 DAP endosperm	5 DAP endosperm	7 DAP endosperm
LOC_Os01g02870	5 DAP-specific		n.d.	Unclassified MEG	n.d.		auxin-induced protein 5NG4, putative, expressed
LOC_Os01g04350	7 DAP-specific		n.d.	n.d.	Unclassified MEG		hsp20/alpha crystallin family protein, putative, expressed
LOC_Os01g04600	5 DAP-specific		n.d.	Allelic imprinted MEG	n.d.		expressed protein
LOC_Os01g07610	3 DAP-specific		Allelic imprinted MEG	n.d.	n.d.		PPR repeat domain containing protein, putative, expressed
LOC_Os01g08330	7 DAP-specific		n.d.	n.d.	Allelic imprinted MEG		aspartic proteinase nepenthesin-1 precursor, putative, expressed
LOC_Os01g10080	Persistent		Locus-imprinted MEG	Locus-imprinted MEG	Locus-imprinted MEG		expressed protein
LOC_Os01g10480	5 DAP-specific		n.d.	Locus-imprinted MEG	n.d.		plastocyanin-like domain containing protein, putative, expressed
LOC_Os01g10520	Persistent		Locus-imprinted MEG	Locus-imprinted MEG	Locus-imprinted MEG		expressed protein
LOC_Os01g12890	Persistent		Locus-imprinted MEG	Locus-imprinted MEG	Locus-imprinted MEG		expressed protein
LOC_Os01g13180	Persistent		Allelic imprinted MEG	Locus-imprinted MEG	Locus-imprinted MEG		expressed protein
LOC_Os01g13250	7 DAP-specific		n.d.	n.d.	Unclassified MEG		sarcoma antigen NY-SAR-91, putative, expressed
LOC_Os01g13470	7 DAP-specific		n.d.	n.d.	Allelic imprinted MEG		KH domain containing protein, putative, expressed
LOC_Os01g18810	Persistent		Allelic imprinted MEG	Locus-imprinted MEG	Locus-imprinted MEG		expressed protein
LOC_Os01g24460	3 DAP-specific		Locus-imprinted MEG	n.d.	n.d.		histone-like transcription factor and archaeal histone, putative, expressed
LOC_Os01g24710	7 DAP-specific		n.d.	n.d.	Allelic imprinted MEG		jacalin-like lectin domain containing protein, expressed
LOC_Os01g24880	5 and 7 DAP overlapped		n.d.	Allelic imprinted MEG	Allelic imprinted MEG		zinc finger, C3HC4 type domain containing protein, expressed
LOC_Os01g27570	3 DAP-specific		Unclassified MEG	n.d.	n.d.		expressed protein
LOC_Os01g28300	Persistent		Allelic imprinted MEG	Locus-imprinted MEG	Locus-imprinted MEG		OsFBX7 - F-box domain containing protein, expressed
LOC_Os01g28810	3 DAP-specific		Allelic imprinted MEG	n.d.	n.d.		expressed protein
LOC_Os01g33324	7 DAP-specific		n.d.	n.d.	Unclassified MEG		retrotransposon protein, putative, Ty1-copia subclass, expressed
LOC_Os01g33370	Persistent		Unclassified MEG	Unclassified MEG	Unclassified MEG		zinc-binding protein, putative, expressed
LOC_Os01g34400	Persistent		Unclassified MEG	Unclassified MEG	Unclassified MEG		transposon protein, putative, Pong sub-class, expressed
LOC_Os01g34410	Persistent		Unclassified MEG	Unclassified MEG	Unclassified MEG		transposon protein, putative, Pong sub-class, expressed
LOC_Os01g37580	3 DAP-specific		Unclassified MEG	n.d.	n.d.		retrotransposon protein, putative, unclassified, expressed
LOC_Os01g38650	Persistent		Unclassified MEG	Unclassified MEG	Unclassified MEG		expressed protein
LOC_Os01g40450	Persistent		Locus-imprinted MEG	Locus-imprinted MEG	Locus-imprinted MEG		2-aminoethanethiol dioxygenase, putative, expressed
LOC_Os01g42090	5 DAP-specific		n.d.	Unclassified MEG	n.d.		nodulin MtN3 family protein, putative, expressed
LOC_Os01g42210	3 and 5 DAP overlapped		Unclassified MEG	Unclassified MEG	n.d.		LTPL47 - Protease inhibitor/seed storage/LTP family protein precursor, putative, expressed
LOC_Os01g42270	Persistent		Locus-imprinted MEG	Locus-imprinted MEG	Locus-imprinted MEG		transcriptional corepressor LEUNIG, putative, expressed
LOC_Os01g46910	Persistent		Unclassified MEG	Unclassified MEG	Unclassified MEG		microneme protein Sm70, putative, expressed
LOC_Os01g47130	3 DAP-specific		Allelic imprinted MEG	n.d.	n.d.		expressed protein
LOC_Os01g48580	Persistent		Locus-imprinted MEG	Locus-imprinted MEG	Locus-imprinted MEG		ubiquitin-conjugating enzyme E2, putative, expressed
LOC_Os01g49360	5 DAP-specific		n.d.	Allelic imprinted MEG	n.d.		FAD-binding and arabino-lactone oxidase domains containing protein, putative, expressed
LOC_Os01g55950	7 DAP-specific		n.d.	n.d.	Allelic imprinted MEG		acetamidase, putative, expressed
LOC_Os01g56710	5 DAP-specific		n.d.	Unclassified MEG	n.d.		OsFBDUF6 - F-box and DUF domain containing protein, expressed
LOC_Os01g57770	3 DAP-specific		Allelic imprinted MEG	n.d.	n.d.		OsPOP4 - Putative Prolyl Oligopeptidase homologue, expressed
LOC_Os01g60360	5 and 7 DAP overlapped		n.d.	Unclassified MEG	Unclassified MEG		ubiquitin-conjugating enzyme, putative, expressed
LOC_Os01g60750	Persistent		Locus-imprinted MEG	Allelic imprinted MEG	Locus-imprinted MEG		transposon protein, putative, unclassified, expressed
LOC_Os01g63710	5 DAP-specific		n.d.	Allelic imprinted MEG	n.d.		CDC6 - Putative DNA replication initiation protein, expressed
LOC_Os01g64810	5 and 7 DAP overlapped		n.d.	Locus-imprinted MEG	Locus-imprinted MEG		zinc finger DHHC domain-containing protein, putative, expressed
LOC_Os01g65770	3 and 5 DAP overlapped		Allelic imprinted MEG	Allelic imprinted MEG	n.d.		expressed protein
LOC_Os01g66510	3 DAP-specific		Unclassified MEG	n.d.	n.d.		MLO domain containing protein, putative, expressed
LOC_Os01g67390	3 DAP-specific		Allelic imprinted MEG	n.d.	n.d.		POEI32 - Pollen Ole e I allergen and extensin family protein precursor, expressed
LOC_Os02g02400	3 DAP-specific		Allelic imprinted MEG	n.d.	n.d.		catalase isozyme A, putative, expressed
LOC_Os02g04190	3 DAP-specific		Unclassified MEG	n.d.	n.d.		THION23 - Plant thionin family protein precursor, expressed
LOC_Os02g04230	5 and 7 DAP overlapped		n.d.	Unclassified MEG	Unclassified MEG		CGMC MAPKCMGC 2.7 - CGMC includes CDA, MAPK, GSK3, and CLKC kinases, expressed
LOC_Os02g04340	7 DAP-specific		n.d.	n.d.	Unclassified MEG		NIN-like protein 2, putative, expressed
LOC_Os02g05050	5 DAP-specific		n.d.	Unclassified MEG	n.d.		OsSAUR4 - Auxin-responsive SAUR gene family member, expressed
LOC_Os02g08490	3 DAP-specific		Allelic imprinted MEG	n.d.	n.d.		chaperone protein clpB 1, putative, expressed
LOC_Os02g09580	Persistent		Locus-imprinted MEG	Locus-imprinted MEG	Unclassified MEG		OsFBX39 - F-box domain containing protein, expressed
LOC_Os02g10600	5 DAP-specific		n.d.	Unclassified MEG	n.d.		OsFBA1 - F-box and FBA domain containing protein, expressed
LOC_Os02g13870	3 DAP-specific		Allelic imprinted MEG	n.d.	n.d.		aquaporin protein, putative, expressed
LOC_Os02g14720	5 and 7 DAP overlapped		n.d.	Locus-imprinted MEG	Locus-imprinted MEG		expressed protein
LOC_Os02g15070	5 DAP-specific		n.d.	Allelic imprinted MEG	n.d.		glutelin, putative, expressed
LOC_Os02g15350	3 and 5 DAP overlapped		Allelic imprinted MEG	Allelic imprinted MEG	n.d.		dof zinc finger domain containing protein, putative, expressed
LOC_Os02g19340	3 DAP-specific		Unclassified MEG	n.d.	n.d.		expressed protein
LOC_Os02g19880	3 DAP-specific		Locus-imprinted MEG	n.d.	n.d.		expressed protein
LOC_Os02g20950	5 DAP-specific		n.d.	Allelic imprinted MEG	n.d.		expressed protein
LOC_Os02g21550	3 DAP-specific		Allelic imprinted MEG	n.d.	n.d.		flavonol synthase/flavanone 3-hydroxylase, putative, expressed
LOC_Os02g21870	5 DAP-specific		n.d.	Unclassified MEG	n.d.		expressed protein
LOC_Os02g23950	3 DAP-specific		Locus-imprinted MEG	n.d.	n.d.		transposon protein, putative, Pong sub-class, expressed
LOC_Os02g25820	3 DAP-specific		Locus-imprinted MEG	n.d.	n.d.		B3 DNA binding domain containing protein, expressed
LOC_Os02g28580	Persistent		Locus-imprinted MEG	Locus-imprinted MEG	Locus-imprinted MEG		expressed protein
LOC_Os02g28660	Persistent		Locus-imprinted MEG	Locus-imprinted MEG	Locus-imprinted MEG		expressed protein
LOC_Os02g29230	Persistent		Locus-imprinted MEG	Locus-imprinted MEG	Locus-imprinted MEG		expressed protein
LOC_Os02g30420	3 DAP-specific		Allelic imprinted MEG	n.d.	n.d.		expressed protein
LOC_Os02g31140	3 DAP-specific		Allelic imprinted MEG	n.d.	n.d.		major ampullate spidroin 2-2, putative, expressed
LOC_Os02g31970	5 and 7 DAP overlapped		n.d.	Unclassified MEG	Unclassified MEG		retrotransposon protein, putative, unclassified, expressed
LOC_Os02g32210	3 and 7 DAP overlapped		Allelic imprinted MEG	n.d.	Allelic imprinted MEG		expressed protein
LOC_Os02g32650	3 DAP-specific		Unclassified MEG	n.d.	n.d.		expressed protein
LOC_Os02g33530	3 DAP-specific		Unclassified MEG	n.d.	n.d.		retrotransposon protein, putative, unclassified, expressed
LOC_Os02g33700	Persistent		Locus-imprinted MEG	Locus-imprinted MEG	Unclassified MEG		expressed protein
LOC_Os02g34330	3 and 5 DAP overlapped		Allelic imprinted MEG	Allelic imprinted MEG	n.d.		retrotransposon protein, putative, unclassified, expressed
LOC_Os02g34990	Persistent		Locus-imprinted MEG	Locus-imprinted MEG	Allelic imprinted MEG		ACT domain containing protein, putative, expressed
LOC_Os02g36550	7 DAP-specific		n.d.	n.d.	Allelic imprinted MEG		phosphopantothenate--cysteine ligase, putative, expressed
LOC_Os02g38080	7 DAP-specific		n.d.	n.d.	Unclassified MEG		protein kinase domain containing protein, expressed
LOC_Os02g42220	5 DAP-specific		n.d.	Allelic imprinted MEG	n.d.		transposon protein, putative, unclassified, expressed
LOC_Os02g43460	5 and 7 DAP overlapped		n.d.	Locus-imprinted MEG	Locus-imprinted MEG		required to maintain repression 1, putative, expressed
LOC_Os02g44290	3 DAP-specific		Unclassified MEG	n.d.	n.d.		phosphatase, putative, expressed
LOC_Os02g47340	3 DAP-specific		Unclassified MEG	n.d.	n.d.		retrotransposon protein, putative, unclassified, expressed
LOC_Os02g52630	3 DAP-specific		Allelic imprinted MEG	n.d.	n.d.		xyloglucan fucosyltransferase, putative, expressed
LOC_Os03g04350	3 DAP-specific		Allelic imprinted MEG	n.d.	n.d.		expressed protein
LOC_Os03g05800	3 DAP-specific		Allelic imprinted MEG	n.d.	n.d.		expressed protein
LOC_Os03g07500	3 DAP-specific		Unclassified MEG	n.d.	n.d.		hypothetical protein
LOC_Os03g15990	Persistent		Locus-imprinted MEG	Allelic imprinted MEG	Locus-imprinted MEG		EDM2, putative, expressed
LOC_Os03g16760	5 and 7 DAP overlapped		n.d.	Locus-imprinted MEG	Locus-imprinted MEG		protein phosphatase 2C, putative, expressed
LOC_Os03g16940	5 DAP-specific		n.d.	Allelic imprinted MEG	n.d.		glyoxalase family protein, putative, expressed
LOC_Os03g20430	Persistent		Locus-imprinted MEG	Locus-imprinted MEG	Locus-imprinted MEG		histone-lysine N-methyltransferase, H3 lysine-9 specific SUVH8, putative, expressed
LOC_Os03g21870	Persistent		Unclassified MEG	Unclassified MEG	Unclassified MEG		DUF623 domain containing protein, expressed
LOC_Os03g22470	7 DAP-specific		n.d.	n.d.	Allelic imprinted MEG		desiccation-related protein PCC13-62 precursor, putative, expressed
LOC_Os03g22810	5 DAP-specific		n.d.	Unclassified MEG	n.d.		copper/zinc superoxide dismutase, putative, expressed
LOC_Os03g26280	5 DAP-specific		n.d.	Allelic imprinted MEG	n.d.		expressed protein
LOC_Os03g29740	5 DAP-specific		n.d.	Unclassified MEG	n.d.		LSM domain containing protein, expressed
LOC_Os03g30750	3 DAP-specific		Unclassified MEG	n.d.	n.d.		hypothetical protein
LOC_Os03g31210	5 DAP-specific		n.d.	Allelic imprinted MEG	n.d.		UDP-glucose 6-dehydrogenase, putative, expressed
LOC_Os03g31944	Persistent		Allelic imprinted MEG	Allelic imprinted MEG	Allelic imprinted MEG		expressed protein
LOC_Os03g32460	3 DAP-specific		Locus-imprinted MEG	n.d.	n.d.		retrotransposon, putative, centromere-specific, expressed
LOC_Os03g38610	3 DAP-specific		Allelic imprinted MEG	n.d.	n.d.		OsMADS87 - MADS-box family gene with M-gamma type-box, expressed
LOC_Os03g42670	3 DAP-specific		Unclassified MEG	n.d.	n.d.		transposon protein, putative, unclassified, expressed
LOC_Os03g48810	3 DAP-specific		Locus-imprinted MEG	n.d.	n.d.		nucleobase-ascorbate transporter, putative, expressed
LOC_Os03g51220	3 and 5 DAP overlapped		Allelic imprinted MEG	Locus-imprinted MEG	n.d.		SWI/SNF-related matrix-associated actin-dependent regulator of chromatin subfamily C member, putative, expressed
LOC_Os03g52620	3 DAP-specific		Allelic imprinted MEG	n.d.	n.d.		expressed protein
LOC_Os03g53590	3 DAP-specific		Unclassified MEG	n.d.	n.d.		expressed protein
LOC_Os03g55820	3 DAP-specific		Allelic imprinted MEG	n.d.	n.d.		thioredoxin, putative, expressed
LOC_Os03g57690	7 DAP-specific		n.d.	n.d.	Allelic imprinted MEG		aldehyde oxidase, putative, expressed
LOC_Os03g58530	5 DAP-specific		n.d.	Allelic imprinted MEG	n.d.		ES43 protein, putative, expressed
LOC_Os03g60810	3 DAP-specific		Allelic imprinted MEG	n.d.	n.d.		lectin-like receptor kinase, putative, expressed
LOC_Os03g61070	3 DAP-specific		Allelic imprinted MEG	n.d.	n.d.		expressed protein
LOC_Os04g01650	5 DAP-specific		n.d.	Unclassified MEG	n.d.		erythronate-4-phosphate dehydrogenase domain containing protein, expressed
LOC_Os04g08034	Persistent		Locus-imprinted MEG	Locus-imprinted MEG	Locus-imprinted MEG		ZOS4-02 - C2H2 zinc finger protein, expressed
LOC_Os04g08570	Persistent		Locus-imprinted MEG	Locus-imprinted MEG	Locus-imprinted MEG		uncharacterized PE-PGRS family protein PE PGRS20, putative, expressed
LOC_Os04g10260	Persistent		Locus-imprinted MEG	Locus-imprinted MEG	Locus-imprinted MEG		basic region leucine zipper domain containing protein, expressed
LOC_Os04g11730	3 and 5 DAP overlapped		Locus-imprinted MEG	Allelic imprinted MEG	n.d.		methyl-CpG binding domain containing protein, expressed
LOC_Os04g12540	3 DAP-specific		Allelic imprinted MEG	n.d.	n.d.		receptor-like protein kinase, putative, expressed
LOC_Os04g13210	5 and 7 DAP overlapped		n.d.	Allelic imprinted MEG	Locus-imprinted MEG		multidrug resistance-associated protein, putative, expressed
LOC_Os06g46435	3 and 7 DAP overlapped		Allelic imprinted MEG	n.d.	Allelic imprinted MEG		NADPH-dependent oxidoreductase, putative, expressed
LOC_Os04g24710	7 DAP-specific		n.d.	n.d.	Allelic imprinted MEG		ubiquitin carboxyl-terminal hydrolase, family 1, putative, expressed
LOC_Os09g32210	3 and 7 DAP overlapped		Allelic imprinted MEG	n.d.	Allelic imprinted MEG		pumilio-family RNA binding repeat containing protein, expressed
LOC_Os04g25870	3 DAP-specific		Locus-imprinted MEG	n.d.	n.d.		OsMADS84 - MADS-box family gene with M-gamma type-box, expressed
LOC_Os04g28120	Persistent		Unclassified MEG	Unclassified MEG	Unclassified MEG		response regulator receiver domain containing protein, expressed
LOC_Os04g32890	3 DAP-specific		Unclassified MEG	n.d.	n.d.		retrotransposon protein, putative, unclassified, expressed
LOC_Os04g33560	3 DAP-specific		Unclassified MEG	n.d.	n.d.		expressed protein
LOC_Os04g33760	3 DAP-specific		Locus-imprinted MEG	n.d.	n.d.		DUF584 domain containing protein, putative, expressed
LOC_Os04g35000	3 and 5 DAP overlapped		Unclassified MEG	Unclassified MEG	n.d.		expressed protein
LOC_Os04g38525	Persistent		Locus-imprinted MEG	Locus-imprinted MEG	Locus-imprinted MEG		expressed protein
LOC_Os04g39560	Persistent		Locus-imprinted MEG	Locus-imprinted MEG	Locus-imprinted MEG		expressed protein
LOC_Os04g41620	3 DAP-specific		Allelic imprinted MEG	n.d.	n.d.		CHIT2 - Chitinase family protein precursor, expressed
LOC_Os04g46300	5 DAP-specific		n.d.	Allelic imprinted MEG	n.d.		disease resistance protein RPM1, putative, expressed
LOC_Os04g47760	3 DAP-specific		Allelic imprinted MEG	n.d.	n.d.		transposon protein, putative, Pong sub-class, expressed
LOC_Os04g48240	3 DAP-specific		Unclassified MEG	n.d.	n.d.		retrotransposon protein, putative, unclassified, expressed
LOC_Os04g51786	3 DAP-specific		Unclassified MEG	n.d.	n.d.		containing DUF163, putative, expressed
LOC_Os04g52220	3 DAP-specific		Unclassified MEG	n.d.	n.d.		expressed protein
LOC_Os04g57190	5 DAP-specific		n.d.	Unclassified MEG	n.d.		ubiquitin carboxyl-terminal hydrolase, family 1, putative, expressed
LOC_Os04g58610	3 DAP-specific		Allelic imprinted MEG	n.d.	n.d.		retrotransposon protein, putative, unclassified, expressed
LOC_Os05g01444	3 DAP-specific		Unclassified MEG	n.d.	n.d.		polygalacturonase inhibitor precursor, putative, expressed
LOC_Os05g05660	Persistent		Locus-imprinted MEG	Locus-imprinted MEG	Locus-imprinted MEG		PWWP domain containing protein, expressed
LOC_Os05g09708	5 and 7 DAP overlapped		n.d.	Allelic imprinted MEG	Unclassified MEG		expressed protein
LOC_Os05g10800	5 and 7 DAP overlapped		n.d.	Locus-imprinted MEG	Locus-imprinted MEG		expressed protein
LOC_Os05g12490	5 DAP-specific		n.d.	Allelic imprinted MEG	n.d.		transporter-related, putative, expressed
LOC_Os05g13940	3 and 5 DAP overlapped		Allelic imprinted MEG	Allelic imprinted MEG	n.d.		retrotransposon protein, putative, unclassified, expressed
LOC_Os12g15980	3 and 7 DAP overlapped		Locus-imprinted MEG	n.d.	Allelic imprinted MEG		expressed protein
LOC_Os05g23870	7 DAP-specific		n.d.	n.d.	Allelic imprinted MEG		transposon protein, putative, Mutator sub-class, expressed
LOC_Os05g23910	3 and 5 DAP overlapped		Allelic imprinted MEG	Locus-imprinted MEG	n.d.		histone-like transcription factor and archaeal histone, putative, expressed
LOC_Os05g23950	Persistent		Locus-imprinted MEG	Locus-imprinted MEG	Locus-imprinted MEG		TRAF-type zinc finger family protein, expressed
LOC_Os05g24340	3 DAP-specific		Allelic imprinted MEG	n.d.	n.d.		transposon protein, putative, CACTA, En/Spm sub-class, expressed
LOC_Os05g26032	3 DAP-specific		Allelic imprinted MEG	n.d.	n.d.		expressed protein
LOC_Os05g26040	Persistent		Locus-imprinted MEG	Locus-imprinted MEG	Locus-imprinted MEG		pumilio-family RNA binding repeat containing protein, expressed
LOC_Os05g26110	Persistent		Allelic imprinted MEG	Locus-imprinted MEG	Locus-imprinted MEG		transposon protein, putative, Mutator sub-class, expressed
LOC_Os05g26690	5 DAP-specific		n.d.	Allelic imprinted MEG	n.d.		PROLM15 - Prolamin precursor, putative, expressed
LOC_Os05g26720	5 DAP-specific		n.d.	Allelic imprinted MEG	n.d.		PROLM16 - Prolamin precursor, expressed
LOC_Os05g26750	5 and 7 DAP overlapped		n.d.	Locus-imprinted MEG	Locus-imprinted MEG		PROLM17 - Prolamin precursor, expressed
LOC_Os05g26770	5 and 7 DAP overlapped		n.d.	Locus-imprinted MEG	Locus-imprinted MEG		PROLM18 - Prolamin precursor, expressed
LOC_Os05g30150	5 and 7 DAP overlapped		n.d.	Locus-imprinted MEG	Locus-imprinted MEG		amino acid transporter family protein, putative, expressed
LOC_Os05g34310	Persistent		Locus-imprinted MEG	Locus-imprinted MEG	Locus-imprinted MEG		no apical meristem protein, putative, expressed
LOC_Os05g34670	5 and 7 DAP overlapped		n.d.	Allelic imprinted MEG	Allelic imprinted MEG		KH domain containing protein, putative, expressed
LOC_Os05g36090	5 DAP-specific		n.d.	Unclassified MEG	n.d.		zinc finger DHHC domain-containing protein, putative, expressed
LOC_Os05g36380	5 DAP-specific		n.d.	Unclassified MEG	n.d.		expressed protein
LOC_Os05g38600	5 and 7 DAP overlapped		n.d.	Allelic imprinted MEG	Locus-imprinted MEG		ZOS5-09 - C2H2 zinc finger protein, expressed
LOC_Os05g40790	Persistent		Locus-imprinted MEG	Locus-imprinted MEG	Locus-imprinted MEG		CCR4-NOT transcription factor, putative, expressed
LOC_Os05g46660	7 DAP-specific		n.d.	n.d.	Unclassified MEG		transposon protein, putative, Mutator sub-class
LOC_Os05g48610	Persistent		Locus-imprinted MEG	Locus-imprinted MEG	Allelic imprinted MEG		expressed protein
LOC_Os05g49380	3 DAP-specific		Allelic imprinted MEG	n.d.	n.d.		OsDegp9 - Putative Deg protease homologue, expressed
LOC_Os05g50390	Persistent		Allelic imprinted MEG	Locus-imprinted MEG	Locus-imprinted MEG		expressed protein
LOC_Os06g07230	3 DAP-specific		Unclassified MEG	n.d.	n.d.		tyrosine protein kinase domain containing protein, putative, expressed
LOC_Os06g10710	3 DAP-specific		Unclassified MEG	n.d.	n.d.		expressed protein
LOC_Os06g11730	Persistent		Allelic imprinted MEG	Locus-imprinted MEG	Locus-imprinted MEG		RNA recognition motif containing protein, putative, expressed
LOC_Os06g11760	5 DAP-specific		n.d.	Allelic imprinted MEG	n.d.		expressed protein
LOC_Os06g13750	5 DAP-specific		n.d.	Unclassified MEG	n.d.		expressed protein
LOC_Os06g13900	3 DAP-specific		Unclassified MEG	n.d.	n.d.		transposon protein, putative, unclassified, expressed
LOC_Os06g24920	3 DAP-specific		Allelic imprinted MEG	n.d.	n.d.		SAR DNA-binding protein-like, putative, expressed
LOC_Os06g29250	7 DAP-specific		n.d.	n.d.	Unclassified MEG		expressed protein
LOC_Os06g29740	Persistent		Locus-imprinted MEG	Allelic imprinted MEG	Allelic imprinted MEG		OsFBX197 - F-box domain containing protein, expressed
LOC_Os06g30280	5 and 7 DAP overlapped		n.d.	Locus-imprinted MEG	Locus-imprinted MEG		expressed protein
LOC_Os06g32944	Persistent		Unclassified MEG	Unclassified MEG	Unclassified MEG		transposon protein, putative, Pong sub-class, expressed
LOC_Os06g33480	5 DAP-specific		n.d.	Locus-imprinted MEG	n.d.		CAPIP1, putative, expressed
LOC_Os06g33640	5 and 7 DAP overlapped		n.d.	Locus-imprinted MEG	Locus-imprinted MEG		CAPIP1, putative, expressed
LOC_Os06g33690	5 and 7 DAP overlapped		n.d.	Locus-imprinted MEG	Locus-imprinted MEG		CAPIP1, putative, expressed
LOC_Os06g37300	5 DAP-specific		n.d.	Unclassified MEG	n.d.		cytochrome P450, putative, expressed
LOC_Os06g37830	7 DAP-specific		n.d.	n.d.	Unclassified MEG		transposon protein, putative, CACTA, En/Spm sub-class, expressed
LOC_Os06g40520	3 and 5 DAP overlapped		Allelic imprinted MEG	Unclassified MEG	n.d.		TNP1, putative, expressed
LOC_Os06g45640	7 DAP-specific		n.d.	n.d.	Allelic imprinted MEG		core histone H2A/H2B/H3/H4, putative, expressed
LOC_Os04g25190	3 and 7 DAP overlapped		Allelic imprinted MEG	n.d.	Unclassified MEG		pollen allergen, putative, expressed
LOC_Os06g48320	7 DAP-specific		n.d.	n.d.	Allelic imprinted MEG		EDR2, putative, expressed
LOC_Os06g48660	5 DAP-specific		n.d.	Unclassified MEG	n.d.		DEFL21 - Defensin and Defensin-like DEFL family, expressed
LOC_Os06g51490	3 DAP-specific		Allelic imprinted MEG	n.d.	n.d.		PHD-finger domain containing protein, putative, expressed
LOC_Os07g01400	5 DAP-specific		n.d.	Unclassified MEG	n.d.		peroxidase precursor, putative, expressed
LOC_Os07g01450	Persistent		Unclassified MEG	Unclassified MEG	Unclassified MEG		DNA directed RNA polymerase, 7 kDa subunit domain containing protein, expressed
LOC_Os07g01900	Persistent		Unclassified MEG	Unclassified MEG	Unclassified MEG		expressed protein
LOC_Os07g08370	5 and 7 DAP overlapped		n.d.	Allelic imprinted MEG	Allelic imprinted MEG		expressed protein
LOC_Os04g22130	3 and 7 DAP overlapped		Locus-imprinted MEG	n.d.	Unclassified MEG		conserved hypothetical protein
LOC_Os07g09020	Persistent		Locus-imprinted MEG	Unclassified MEG	Unclassified MEG		argonaute, putative, expressed
LOC_Os07g10840	3 DAP-specific		Allelic imprinted MEG	n.d.	n.d.		uncharacterized glycosyltransferase, putative, expressed
LOC_Os07g11120	5 and 7 DAP overlapped		n.d.	Unclassified MEG	Unclassified MEG		hydrolase, NUDIX family, domain containing protein, expressed
LOC_Os07g12130	5 DAP-specific		n.d.	Locus-imprinted MEG	n.d.		MYB family transcription factor, putative, expressed
LOC_Os07g12260	Persistent		Allelic imprinted MEG	Locus-imprinted MEG	Allelic imprinted MEG		retrotransposon protein, putative, unclassified, expressed
LOC_Os07g17300	7 DAP-specific		n.d.	n.d.	Allelic imprinted MEG		expressed protein
LOC_Os07g20110	Persistent		Locus-imprinted MEG	Locus-imprinted MEG	Locus-imprinted MEG		expressed protein
LOC_Os07g27030	Persistent		Allelic imprinted MEG	Locus-imprinted MEG	Allelic imprinted MEG		OsFBX236 - F-box domain containing protein, expressed
LOC_Os07g28850	3 and 5 DAP overlapped		Locus-imprinted MEG	Allelic imprinted MEG	n.d.		retrotransposon protein, putative, unclassified, expressed
LOC_Os07g32360	Persistent		Allelic imprinted MEG	Locus-imprinted MEG	Locus-imprinted MEG		expressed protein
LOC_Os07g32370	7 DAP-specific		n.d.	n.d.	Unclassified MEG		transposon protein, putative, unclassified, expressed
LOC_Os07g34550	Persistent		Locus-imprinted MEG	Locus-imprinted MEG	Locus-imprinted MEG		retrotransposon protein, putative, unclassified, expressed
LOC_Os07g34620	Persistent		Locus-imprinted MEG	Locus-imprinted MEG	Locus-imprinted MEG		expressed protein
LOC_Os07g39020	3 DAP-specific		Locus-imprinted MEG	n.d.	n.d.		OsSub53 - Putative Subtilisin homologue, expressed
LOC_Os07g39950	5 DAP-specific		n.d.	Allelic imprinted MEG	n.d.		mitotic checkpoint protein, putative, expressed
LOC_Os07g41650	5 and 7 DAP overlapped		n.d.	Locus-imprinted MEG	Locus-imprinted MEG		pectinesterase, putative, expressed
LOC_Os07g42150	3 DAP-specific		Allelic imprinted MEG	n.d.	n.d.		transcription initiation factor IID, putative, expressed
LOC_Os07g42390	Persistent		Allelic imprinted MEG	Allelic imprinted MEG	Allelic imprinted MEG		DUF581 domain containing protein, expressed
LOC_Os07g44060	3 DAP-specific		Locus-imprinted MEG	n.d.	n.d.		haloacid dehalogenase-like hydrolase family protein, putative, expressed
LOC_Os07g48110	3 and 5 DAP overlapped		Unclassified MEG	Unclassified MEG	n.d.		expressed protein
LOC_Os07g48400	Persistent		Locus-imprinted MEG	Locus-imprinted MEG	Locus-imprinted MEG		retrotransposon protein, putative, unclassified, expressed
LOC_Os07g48910	3 DAP-specific		Allelic imprinted MEG	n.d.	n.d.		retrotransposon protein, putative, unclassified, expressed
LOC_Os08g01570	Persistent		Locus-imprinted MEG	Locus-imprinted MEG	Locus-imprinted MEG		retrotransposon protein, putative, unclassified, expressed
LOC_Os08g03350	3 DAP-specific		Allelic imprinted MEG	n.d.	n.d.		amino acid transporter, putative, expressed
LOC_Os08g03470	Persistent		Unclassified MEG	Unclassified MEG	Unclassified MEG		MBTB15 - Bric-a-Brac, Tramtrack, Broad Complex BTB domain with Meprin and TRAF Homology MATH domain, expressed
LOC_Os08g04290	Persistent		Locus-imprinted MEG	Locus-imprinted MEG	Locus-imprinted MEG		WD domain, G-beta repeat domain containing protein, expressed
LOC_Os08g06330	Persistent		Locus-imprinted MEG	Locus-imprinted MEG	Locus-imprinted MEG		zinc finger C-x8-C-x5-C-x3-H type family protein, expressed
LOC_Os08g08960	5 and 7 DAP overlapped		n.d.	Locus-imprinted MEG	Locus-imprinted MEG		Cupin domain containing protein, expressed
LOC_Os08g09700	5 and 7 DAP overlapped		n.d.	Locus-imprinted MEG	Locus-imprinted MEG		OsFBX270 - F-box domain containing protein, expressed
LOC_Os08g15840	7 DAP-specific		n.d.	n.d.	Allelic imprinted MEG		ankyrin repeat-rich protein, putative, expressed
LOC_Os08g19590	5 and 7 DAP overlapped		n.d.	Allelic imprinted MEG	Allelic imprinted MEG		Homeobox domain containing protein, expressed
LOC_Os08g23580	7 DAP-specific		n.d.	n.d.	Unclassified MEG		transposon protein, putative, CACTA, En/Spm sub-class, expressed
LOC_Os08g23590	5 and 7 DAP overlapped		n.d.	Allelic imprinted MEG	Allelic imprinted MEG		ankyrin repeat domain containing protein, expressed
LOC_Os08g26990	3 DAP-specific		Allelic imprinted MEG	n.d.	n.d.		response regulator receiver domain containing protein, expressed
LOC_Os08g27870	Persistent		Locus-imprinted MEG	Locus-imprinted MEG	Locus-imprinted MEG		EARLY flowering protein, putative, expressed
LOC_Os08g28010	7 DAP-specific		n.d.	n.d.	Allelic imprinted MEG		expressed protein
LOC_Os08g28160	3 DAP-specific		Unclassified MEG	n.d.	n.d.		hypothetical protein
LOC_Os08g28170	5 and 7 DAP overlapped		n.d.	Allelic imprinted MEG	Allelic imprinted MEG		nucleobase-ascorbate transporter, putative, expressed
LOC_Os08g28940	Persistent		Allelic imprinted MEG	Allelic imprinted MEG	Allelic imprinted MEG		OsFBX289 - F-box domain containing protein, expressed
LOC_Os08g28960	Persistent		Locus-imprinted MEG	Locus-imprinted MEG	Locus-imprinted MEG		expressed protein
LOC_Os08g29580	Persistent		Unclassified MEG	Allelic imprinted MEG	Allelic imprinted MEG		expressed protein
LOC_Os08g34690	3 DAP-specific		Allelic imprinted MEG	n.d.	n.d.		transposon protein, putative, unclassified, expressed
LOC_Os08g38850	5 and 7 DAP overlapped		n.d.	Unclassified MEG	Unclassified MEG		phosphatidylinositol transfer, putative, expressed
LOC_Os08g40350	3 DAP-specific		Allelic imprinted MEG	n.d.	n.d.		expressed protein
LOC_Os08g42350	7 DAP-specific		n.d.	n.d.	Allelic imprinted MEG		nodulin MtN3 family protein, putative, expressed
LOC_Os08g42750	5 DAP-specific		n.d.	Allelic imprinted MEG	n.d.		CAMK CAMK like.37 - CAMK includes calcium/calmodulin depedent protein kinases, expressed
LOC_Os08g44170	Persistent		Unclassified MEG	Unclassified MEG	Locus-imprinted MEG		transposon protein, putative, unclassified, expressed
LOC_Os08g44180	3 and 5 DAP overlapped		Allelic imprinted MEG	Allelic imprinted MEG	n.d.		expressed protein
LOC_Os08g45240	5 DAP-specific		n.d.	Unclassified MEG	n.d.		RNA recognition motif containing protein, putative, expressed
LOC_Os09g01780	3 DAP-specific		Unclassified MEG	n.d.	n.d.		transposon protein, putative, unclassified, expressed
LOC_Os09g01790	7 DAP-specific		n.d.	n.d.	Allelic imprinted MEG		expressed protein
LOC_Os09g02540	5 DAP-specific		n.d.	Allelic imprinted MEG	n.d.		expressed protein
LOC_Os09g02690	Persistent		Locus-imprinted MEG	Locus-imprinted MEG	Locus-imprinted MEG		expressed protein
LOC_Os09g03500	Persistent		Locus-imprinted MEG	Locus-imprinted MEG	Locus-imprinted MEG		ZOS9-01 - C2H2 zinc finger protein, expressed
LOC_Os09g06910	Persistent		Unclassified MEG	Unclassified MEG	Unclassified MEG		retrotransposon protein, putative, unclassified, expressed
LOC_Os09g06950	Persistent		Allelic imprinted MEG	Allelic imprinted MEG	Unclassified MEG		expressed protein
LOC_Os09g07940	Persistent		Allelic imprinted MEG	Locus-imprinted MEG	Locus-imprinted MEG		retrotransposon protein, putative, unclassified, expressed
LOC_Os09g08000	3 DAP-specific		Locus-imprinted MEG	n.d.	n.d.		expressed protein
LOC_Os09g08300	3 DAP-specific		Allelic imprinted MEG	n.d.	n.d.		expressed protein
LOC_Os09g09350	3 DAP-specific		Allelic imprinted MEG	n.d.	n.d.		expressed protein
LOC_Os09g10330	5 and 7 DAP overlapped		n.d.	Locus-imprinted MEG	Locus-imprinted MEG		expressed protein
LOC_Os09g11380	Persistent		Locus-imprinted MEG	Allelic imprinted MEG	Allelic imprinted MEG		expressed protein
LOC_Os09g11900	3 and 5 DAP overlapped		Allelic imprinted MEG	Unclassified MEG	n.d.		expressed protein
LOC_Os09g15540	5 DAP-specific		n.d.	Unclassified MEG	n.d.		OsFBX312 - F-box domain containing protein, expressed
LOC_Os09g17620	5 DAP-specific		n.d.	Allelic imprinted MEG	n.d.		ubiquitin domain-containing protein 2, putative, expressed
LOC_Os09g17800	3 DAP-specific		Allelic imprinted MEG	n.d.	n.d.		retrotransposon protein, putative, unclassified, expressed
LOC_Os09g24290	5 and 7 DAP overlapped		n.d.	Allelic imprinted MEG	Allelic imprinted MEG		agenet domain-containing protein, putative, expressed
LOC_Os09g25160	Persistent		Unclassified MEG	Unclassified MEG	Unclassified MEG		retrotransposon protein, putative, unclassified, expressed
LOC_Os05g14440	3 and 7 DAP overlapped		Unclassified MEG	n.d.	Unclassified MEG		transposon protein, putative, Ac/Ds sub-class, expressed
LOC_Os09g26470	Persistent		Locus-imprinted MEG	Locus-imprinted MEG	Locus-imprinted MEG		zinc finger, C3HC4 type family protein, expressed
LOC_Os09g27960	3 DAP-specific		Allelic imprinted MEG	n.d.	n.d.		transmembrane protein 50A, putative, expressed
LOC_Os09g28150	5 DAP-specific		n.d.	Allelic imprinted MEG	n.d.		bifunctional monodehydroascorbate reductase and carbonic anhydrasenectarin-3 precursor, putative, expressed
LOC_Os07g08880	3 and 7 DAP overlapped		Unclassified MEG	n.d.	Unclassified MEG		ES43 protein, putative, expressed
LOC_Os09g32330	3 DAP-specific		Unclassified MEG	n.d.	n.d.		expressed protein
LOC_Os09g34880	Persistent		Locus-imprinted MEG	Locus-imprinted MEG	Locus-imprinted MEG		basic region leucine zipper domain containing protein, expressed
LOC_Os09g34980	5 DAP-specific		n.d.	Unclassified MEG	n.d.		zinc knuckle family protein, expressed
LOC_Os09g35600	3 and 5 DAP overlapped		Locus-imprinted MEG	Locus-imprinted MEG	n.d.		MATE domain containing protein, expressed
LOC_Os09g36470	Persistent		Allelic imprinted MEG	Locus-imprinted MEG	Locus-imprinted MEG		retrotransposon protein, putative, unclassified, expressed
LOC_Os09g36970	Persistent		Locus-imprinted MEG	Locus-imprinted MEG	Locus-imprinted MEG		expressed protein
LOC_Os10g01380	Persistent		Allelic imprinted MEG	Locus-imprinted MEG	Locus-imprinted MEG		CW7, putative, expressed
LOC_Os10g03870	Persistent		Locus-imprinted MEG	Locus-imprinted MEG	Unclassified MEG		OsFBX353 - F-box domain containing protein, expressed
LOC_Os10g05750	7 DAP-specific		n.d.	n.d.	Allelic imprinted MEG		POEI3 - Pollen Ole e I allergen and extensin family protein precursor, expressed
LOC_Os10g05780	5 DAP-specific		n.d.	Unclassified MEG	n.d.		POT domain containing peptide transporter, putative, expressed
LOC_Os10g06000	7 DAP-specific		n.d.	n.d.	Allelic imprinted MEG		POEI15 - Pollen Ole e I allergen and extensin family protein precursor, expressed
LOC_Os10g08640	5 DAP-specific		n.d.	Allelic imprinted MEG	n.d.		expressed protein
LOC_Os10g11580	Persistent		Locus-imprinted MEG	Locus-imprinted MEG	Allelic imprinted MEG		histone-like transcription factor and archaeal histone, putative, expressed
LOC_Os10g12760	5 DAP-specific		n.d.	Allelic imprinted MEG	n.d.		retrotransposon protein, putative, unclassified, expressed
LOC_Os10g13460	5 and 7 DAP overlapped		n.d.	Locus-imprinted MEG	Locus-imprinted MEG		hypothetical protein
LOC_Os10g21418	7 DAP-specific		n.d.	n.d.	Unclassified MEG		NADPH-dependent oxidoreductase, putative, expressed
LOC_Os10g22980	5 and 7 DAP overlapped		n.d.	Allelic imprinted MEG	Allelic imprinted MEG		leucine rich repeat domain containing protein, putative, expressed
LOC_Os10g25180	3 DAP-specific		Allelic imprinted MEG	n.d.	n.d.		phosphoinositide phosphatase family protein, putative, expressed
LOC_Os10g26430	5 and 7 DAP overlapped		n.d.	Allelic imprinted MEG	Allelic imprinted MEG		agenet domain containing protein, expressed
LOC_Os10g27370	Persistent		Locus-imprinted MEG	Locus-imprinted MEG	Locus-imprinted MEG		transposon protein, putative, Pong sub-class, expressed
LOC_Os10g27380	3 DAP-specific		Allelic imprinted MEG	n.d.	n.d.		expressed protein
LOC_Os10g27390	5 DAP-specific		n.d.	Unclassified MEG	n.d.		no apical meristem protein, putative, expressed
LOC_Os10g29560	5 and 7 DAP overlapped		n.d.	Locus-imprinted MEG	Locus-imprinted MEG		transposon protein, putative, CACTA, En/Spm sub-class, expressed
LOC_Os10g31330	3 DAP-specific		Unclassified MEG	n.d.	n.d.		retrotransposon protein, putative, unclassified, expressed
LOC_Os10g31900	5 DAP-specific		n.d.	Unclassified MEG	n.d.		RNA recognition motif containing protein, putative, expressed
LOC_Os10g33670	3 DAP-specific		Allelic imprinted MEG	n.d.	n.d.		expressed protein
LOC_Os10g36860	3 DAP-specific		Allelic imprinted MEG	n.d.	n.d.		CRS1/YhbY domain containing protein, expressed
LOC_Os10g37830	5 and 7 DAP overlapped		n.d.	Allelic imprinted MEG	Allelic imprinted MEG		OsFBX391 - F-box domain containing protein, expressed
LOC_Os10g39420	5 and 7 DAP overlapped		n.d.	Unclassified MEG	Unclassified MEG		CAMK CAMK like.8 - CAMK includes calcium/calmodulin depedent protein kinases, expressed
LOC_Os11g03220	Persistent		Allelic imprinted MEG	Allelic imprinted MEG	Allelic imprinted MEG		RNA binding protein, putative, expressed
LOC_Os11g11180	3 DAP-specific		Unclassified MEG	n.d.	n.d.		expressed protein
LOC_Os11g11200	3 and 5 DAP overlapped		Locus-imprinted MEG	Unclassified MEG	n.d.		expressed protein
LOC_Os11g13930	3 and 5 DAP overlapped		Unclassified MEG	Unclassified MEG	n.d.		ZF-HD protein dimerisation region containing protein, expressed
LOC_Os11g15620	Persistent		Unclassified MEG	Unclassified MEG	Unclassified MEG		OsFBX420 - F-box domain containing protein, expressed
LOC_Os09g25170	3 and 7 DAP overlapped		Unclassified MEG	n.d.	Unclassified MEG		retrotransposon protein, putative, unclassified, expressed
LOC_Os11g24120	3 DAP-specific		Unclassified MEG	n.d.	n.d.		expressed protein
LOC_Os11g25470	7 DAP-specific		n.d.	n.d.	Unclassified MEG		expressed protein
LOC_Os11g26020	5 DAP-specific		n.d.	Unclassified MEG	n.d.		hypothetical protein
LOC_Os11g26030	5 DAP-specific		n.d.	Allelic imprinted MEG	n.d.		GTPase of unknown function domain containing protein, putative, expressed
LOC_Os11g26830	Persistent		Allelic imprinted MEG	Locus-imprinted MEG	Allelic imprinted MEG		ATP-binding region, ATPase-like domain containing protein, expressed
LOC_Os11g27470	Persistent		Locus-imprinted MEG	Locus-imprinted MEG	Locus-imprinted MEG		expressed protein
LOC_Os11g28184	5 and 7 DAP overlapped		n.d.	Allelic imprinted MEG	Unclassified MEG		expressed protein
LOC_Os11g30220	3 DAP-specific		Allelic imprinted MEG	n.d.	n.d.		hypothetical protein
LOC_Os11g31600	Persistent		Locus-imprinted MEG	Locus-imprinted MEG	Locus-imprinted MEG		hypothetical protein
LOC_Os11g33100	3 DAP-specific		Allelic imprinted MEG	n.d.	n.d.		SNARE associated Golgi protein, putative, expressed
LOC_Os11g36760	Persistent		Allelic imprinted MEG	Locus-imprinted MEG	Locus-imprinted MEG		transmembrane receptor, putative, expressed
LOC_Os11g36770	Persistent		Locus-imprinted MEG	Locus-imprinted MEG	Locus-imprinted MEG		expressed protein
LOC_Os11g37950	3 DAP-specific		Allelic imprinted MEG	n.d.	n.d.		WIP3 - Wound-induced protein precursor, expressed
LOC_Os11g38630	5 DAP-specific		n.d.	Allelic imprinted MEG	n.d.		expressed protein
LOC_Os11g39330	5 DAP-specific		n.d.	Allelic imprinted MEG	n.d.		NB-ARC domain containing protein, putative, expressed
LOC_Os11g40530	5 and 7 DAP overlapped		n.d.	Locus-imprinted MEG	Locus-imprinted MEG		LTPL162 - Protease inhibitor/seed storage/LTP family protein precursor, expressed
LOC_Os11g41890	5 and 7 DAP overlapped		n.d.	Locus-imprinted MEG	Locus-imprinted MEG		RNA recognition motif containing protein, putative, expressed
LOC_Os12g02690	3 DAP-specific		Locus-imprinted MEG	n.d.	n.d.		expressed protein
LOC_Os12g02970	Persistent		Unclassified MEG	Unclassified MEG	Unclassified MEG		RNA binding protein, putative, expressed
LOC_Os12g03250	Persistent		Unclassified MEG	Unclassified MEG	Unclassified MEG		retrotransposon protein, putative, unclassified, expressed
LOC_Os11g23050	3 and 7 DAP overlapped		Unclassified MEG	n.d.	Unclassified MEG		expressed protein
LOC_Os12g06480	Persistent		Unclassified MEG	Unclassified MEG	Unclassified MEG		PHD-finger family protein, expressed
LOC_Os12g06950	7 DAP-specific		n.d.	n.d.	Unclassified MEG		hypothetical protein
LOC_Os12g10540	3 DAP-specific		Allelic imprinted MEG	n.d.	n.d.		OsMADS13 - MADS-box family gene with MIKCc type-box, expressed
LOC_Os12g10800	7 DAP-specific		n.d.	n.d.	Unclassified MEG		transposon protein, putative, unclassified, expressed
LOC_Os12g13390	3 DAP-specific		Allelic imprinted MEG	n.d.	n.d.		aspartyl aminopeptidase, putative, expressed
LOC_Os12g13450	3 and 5 DAP overlapped		Allelic imprinted MEG	Unclassified MEG	n.d.		retrotransposon protein, putative, unclassified, expressed
LOC_Os12g13670	7 DAP-specific		n.d.	n.d.	Locus-imprinted MEG		expressed protein
LOC_Os12g05700	3 and 7 DAP overlapped		Unclassified MEG	n.d.	Unclassified MEG		transposon protein, putative, Mutator sub-class, expressed
LOC_Os12g16600	Persistent		Unclassified MEG	Unclassified MEG	Unclassified MEG		expressed protein
LOC_Os12g17670	Persistent		Unclassified MEG	Locus-imprinted MEG	Locus-imprinted MEG		expressed protein
LOC_Os12g17710	Persistent		Locus-imprinted MEG	Locus-imprinted MEG	Locus-imprinted MEG		expressed protein
LOC_Os12g22650	3 and 5 DAP overlapped		Locus-imprinted MEG	Allelic imprinted MEG	n.d.		histone H3, putative, expressed
LOC_Os12g22680	Persistent		Locus-imprinted MEG	Locus-imprinted MEG	Locus-imprinted MEG		histone H3, putative, expressed
LOC_Os12g23040	Persistent		Locus-imprinted MEG	Locus-imprinted MEG	Locus-imprinted MEG		transposon protein, putative, Mutator sub-class, expressed
LOC_Os12g23520	3 DAP-specific		Unclassified MEG	n.d.	n.d.		retrotransposon protein, putative, Ty3-gypsy subclass, expressed
LOC_Os12g27120	3 DAP-specific		Allelic imprinted MEG	n.d.	n.d.		retrotransposon protein, putative, unclassified, expressed
LOC_Os12g27994	Persistent		Locus-imprinted MEG	Locus-imprinted MEG	Locus-imprinted MEG		expressed protein
LOC_Os12g34022	Persistent		Allelic imprinted MEG	Unclassified MEG	Unclassified MEG		retrotransposon protein, putative, unclassified, expressed
LOC_Os12g34490	3 and 5 DAP overlapped		Allelic imprinted MEG	Allelic imprinted MEG	n.d.		expressed protein
LOC_Os12g39890	3 DAP-specific		Locus-imprinted MEG	n.d.	n.d.		expressed protein
LOC_Os12g40790	Persistent		Unclassified MEG	Unclassified MEG	Unclassified MEG		zinc finger family protein, putative, expressed
LOC_Os12g41140	5 and 7 DAP overlapped		n.d.	Unclassified MEG	Unclassified MEG		expressed protein
LOC_Os12g41710	3 DAP-specific		Unclassified MEG	n.d.	n.d.		Protein kinase domain containing protein, expressed

## Sheet: PEGs
Supplementary Data 3. List of imprint classes for MEGs and PEGs.
locus name	Imprint class		Type of imprinting				MSU annotaion
			3 DAP endosperm	5 DAP endosperm	7 DAP endosperm
LOC_Os01g02050	Persistent		Locus-imprinted PEG	Locus-imprinted PEG	Locus-imprinted PEG		phosphoenolpyruvate carboxylase, putative, expressed
LOC_Os01g03144	Persistent		Unclassified PEG	Unclassified PEG	Unclassified PEG		white-brown complex homolog protein 7, putative, expressed
LOC_Os01g05510	5 and 7 DAP overlapped		n.d.	Allelic imprinted PEG	Allelic imprinted PEG		expressed protein
LOC_Os01g07740	5 and 7 DAP overlapped		n.d.	Locus-imprinted PEG	Locus-imprinted PEG		DEAD-box ATP-dependent RNA helicase 14, putative, expressed
LOC_Os01g07920	Persistent		Allelic imprinted PEG	Locus-imprinted PEG	Locus-imprinted PEG		prolyl 4-hydroxylase, putative, expressed
LOC_Os01g07930	Persistent		Locus-imprinted PEG	Locus-imprinted PEG	Locus-imprinted PEG		zinc finger C-x8-C-x5-C-x3-H type family protein, expressed
LOC_Os01g08570	Persistent		Locus-imprinted PEG	Locus-imprinted PEG	Locus-imprinted PEG		2-oxoglutarate and iron-dependent oxygenase domain-containing protein2, putative, expressed
LOC_Os01g11130	Persistent		Allelic imprinted PEG	Locus-imprinted PEG	Locus-imprinted PEG		RNA recognition motif containing protein, putative, expressed
LOC_Os01g13360	5 and 7 DAP overlapped		n.d.	Locus-imprinted PEG	Locus-imprinted PEG		phosphatidylinositol 3- and 4-kinase family protein, putative, expressed
LOC_Os01g13404	Persistent		Locus-imprinted PEG	Locus-imprinted PEG	Locus-imprinted PEG		ATP binding protein, putative, expressed
LOC_Os01g13460	5 and 7 DAP overlapped		n.d.	Locus-imprinted PEG	Locus-imprinted PEG		helix-loop-helix DNA-binding domain containing protein, expressed
LOC_Os01g16810	Persistent		Locus-imprinted PEG	Locus-imprinted PEG	Unclassified PEG		MYB family transcription factor, putative, expressed
LOC_Os01g17060	3 DAP-specific		Allelic imprinted PEG	n.d.	n.d.		expressed protein
LOC_Os01g17250	5 and 7 DAP overlapped		n.d.	Locus-imprinted PEG	Locus-imprinted PEG		BRASSINOSTEROID INSENSITIVE 1-associated receptor kinase 1 precursor, putative, expressed
LOC_Os01g17990	Persistent		Locus-imprinted PEG	Locus-imprinted PEG	Locus-imprinted PEG		expressed protein
LOC_Os01g23620	7 DAP-specific		n.d.	n.d.	Allelic imprinted PEG		miro, putative, expressed
LOC_Os01g27750	Persistent		Locus-imprinted PEG	Locus-imprinted PEG	Locus-imprinted PEG		bifunctional 3-dehydroquinate dehydratase/shikimate dehydrogenase,chloroplast precursor, putative, expressed
LOC_Os01g28230	3 DAP-specific		Allelic imprinted PEG	n.d.	n.d.		ZOS1-07 - C2H2 zinc finger protein, expressed
LOC_Os01g31629	3 DAP-specific		Locus-imprinted PEG	n.d.	n.d.		expressed protein
LOC_Os01g32890	3 DAP-specific		Unclassified PEG	n.d.	n.d.		expressed protein
LOC_Os01g32980	Persistent		Allelic imprinted PEG	Unclassified PEG	Unclassified PEG		mitochondrial carrier protein, putative, expressed
LOC_Os01g33650	Persistent		Locus-imprinted PEG	Locus-imprinted PEG	Locus-imprinted PEG		expressed protein
LOC_Os01g34880	7 DAP-specific		n.d.	n.d.	Unclassified PEG		callose synthase, putative, expressed
LOC_Os02g03600	3 and 7 DAP overlapped		Allelic imprinted PEG	n.d.	Allelic imprinted PEG		dnaJ domain containing protein, expressed
LOC_Os01g36840	Persistent		Locus-imprinted PEG	Locus-imprinted PEG	Allelic imprinted PEG		ATP-binding region, ATPase-like domain containing protein, expressed
LOC_Os01g40590	Persistent		Locus-imprinted PEG	Locus-imprinted PEG	Locus-imprinted PEG		tyrosine protein kinase domain containing protein, putative, expressed
LOC_Os01g41310	3 DAP-specific		Allelic imprinted PEG	n.d.	n.d.		OsFBX18 - F-box domain containing protein, expressed
LOC_Os01g41370	Persistent		Locus-imprinted PEG	Locus-imprinted PEG	Locus-imprinted PEG		FBD domain containing protein, putative, expressed
LOC_Os01g41630	5 and 7 DAP overlapped		n.d.	Locus-imprinted PEG	Locus-imprinted PEG		serine/threonine protein phosphatase 2A 55 kDa regulatory subunit B, putative, expressed
LOC_Os01g42260	3 DAP-specific		Locus-imprinted PEG	n.d.	n.d.		transcriptional corepressor LEUNIG, putative, expressed
LOC_Os01g42970	3 DAP-specific		Allelic imprinted PEG	n.d.	n.d.		zinc finger C-x8-C-x5-C-x3-H type family protein, expressed
LOC_Os01g51754	5 and 7 DAP overlapped		n.d.	Locus-imprinted PEG	Locus-imprinted PEG		alpha-amylase precursor, putative, expressed
LOC_Os01g54100	Persistent		Locus-imprinted PEG	Allelic imprinted PEG	Locus-imprinted PEG		CK1 CaseinKinase 1a.2 - CK1 includes the casein kinase 1 kinases, expressed
LOC_Os01g54784	Persistent		Locus-imprinted PEG	Locus-imprinted PEG	Locus-imprinted PEG		expressed protein
LOC_Os01g55450	Persistent		Unclassified PEG	Unclassified PEG	Unclassified PEG		CAMK KIN1/SNF1/Nim1 like.11 - CAMK includes calcium/calmodulin depedent protein kinases, expressed
LOC_Os01g55720	3 DAP-specific		Allelic imprinted PEG	n.d.	n.d.		expressed protein
LOC_Os01g56100	Persistent		Allelic imprinted PEG	Locus-imprinted PEG	Locus-imprinted PEG		BSD domain containing protein, expressed
LOC_Os01g56110	Persistent		Locus-imprinted PEG	Locus-imprinted PEG	Locus-imprinted PEG		RNA recognition motif containing protein, putative, expressed
LOC_Os01g56580	Persistent		Locus-imprinted PEG	Locus-imprinted PEG	Locus-imprinted PEG		CK1 CaseinKinase 1a.3 - CK1 includes the casein kinase 1 kinases, expressed
LOC_Os01g56820	Persistent		Locus-imprinted PEG	Allelic imprinted PEG	Allelic imprinted PEG		AGAP000951-PA, putative, expressed
LOC_Os01g61020	3 DAP-specific		Allelic imprinted PEG	n.d.	n.d.		curculin-like lectin family protein, putative, expressed
LOC_Os01g61420	3 DAP-specific		Allelic imprinted PEG	n.d.	n.d.		zinc finger, C3HC4 type domain containing protein, expressed
LOC_Os01g61590	Persistent		Locus-imprinted PEG	Locus-imprinted PEG	Locus-imprinted PEG		CAMK CAMK like.1 - CAMK includes calcium/calmodulin depedent protein kinases, expressed
LOC_Os01g62460	Persistent		Locus-imprinted PEG	Allelic imprinted PEG	Locus-imprinted PEG		ZOS1-16 - C2H2 zinc finger protein, expressed
LOC_Os01g62790	5 and 7 DAP overlapped		n.d.	Unclassified PEG	Allelic imprinted PEG		expressed protein
LOC_Os01g63250	Persistent		Locus-imprinted PEG	Locus-imprinted PEG	Locus-imprinted PEG		josephin, putative, expressed
LOC_Os01g65850	Persistent		Locus-imprinted PEG	Allelic imprinted PEG	Locus-imprinted PEG		CHD3-type chromatin-remodeling factor PICKLE, putative, expressed
LOC_Os01g65986	Persistent		Locus-imprinted PEG	Locus-imprinted PEG	Allelic imprinted PEG		DUF803 domain containing, putative, expressed
LOC_Os01g66070	3 DAP-specific		Unclassified PEG	n.d.	n.d.		PHD-finger domain containing protein, putative
LOC_Os01g66300	3 and 5 DAP overlapped		Locus-imprinted PEG	Unclassified PEG	n.d.		KH domain containing protein, putative, expressed
LOC_Os01g67250	Persistent		Locus-imprinted PEG	Locus-imprinted PEG	Locus-imprinted PEG		Rad21 / Rec8 like protein, putative, expressed
LOC_Os01g67870	5 and 7 DAP overlapped		n.d.	Locus-imprinted PEG	Locus-imprinted PEG		expressed protein
LOC_Os01g68820	Persistent		Locus-imprinted PEG	Locus-imprinted PEG	Locus-imprinted PEG		expressed protein
LOC_Os01g69040	3 DAP-specific		Locus-imprinted PEG	n.d.	n.d.		zinc finger, C3HC4 type domain containing protein, expressed
LOC_Os01g69850	Persistent		Allelic imprinted PEG	Allelic imprinted PEG	Allelic imprinted PEG		OsMADS65 - MADS-box family gene with MIKC* type-box, expressed
LOC_Os01g69910	7 DAP-specific		n.d.	n.d.	Allelic imprinted PEG		calmodulin-binding transcription activator, putative, expressed
LOC_Os01g69920	3 DAP-specific		Allelic imprinted PEG	n.d.	n.d.		histidine kinase, putative, expressed
LOC_Os01g69930	Persistent		Locus-imprinted PEG	Locus-imprinted PEG	Locus-imprinted PEG		dnaJ domain containing protein, expressed
LOC_Os01g69940	Persistent		Locus-imprinted PEG	Locus-imprinted PEG	Locus-imprinted PEG		OsFBX32 - F-box domain containing protein, expressed
LOC_Os01g73450	Persistent		Locus-imprinted PEG	Locus-imprinted PEG	Unclassified PEG		amino acid kinase, putative, expressed
LOC_Os02g01490	3 DAP-specific		Locus-imprinted PEG	n.d.	n.d.		expressed protein
LOC_Os03g14290	3 and 7 DAP overlapped		Allelic imprinted PEG	n.d.	Allelic imprinted PEG		expressed protein
LOC_Os02g03700	3 DAP-specific		Allelic imprinted PEG	n.d.	n.d.		expressed protein
LOC_Os02g04450	Persistent		Allelic imprinted PEG	Unclassified PEG	Unclassified PEG		plant-specific domain TIGR01589 family protein, putative, expressed
LOC_Os02g05520	3 DAP-specific		Unclassified PEG	n.d.	n.d.		expressed protein
LOC_Os02g05630	Persistent		Allelic imprinted PEG	Allelic imprinted PEG	Locus-imprinted PEG		protein phosphatase 2C, putative, expressed
LOC_Os02g06390	3 DAP-specific		Unclassified PEG	n.d.	n.d.		expressed protein
LOC_Os02g06890	Persistent		Unclassified PEG	Unclassified PEG	Unclassified PEG		OTU-like cysteine protease family protein, putative, expressed
LOC_Os02g07450	5 and 7 DAP overlapped		n.d.	Unclassified PEG	Unclassified PEG		core histone H2A/H2B/H3/H4, putative, expressed
LOC_Os02g07790	Persistent		Locus-imprinted PEG	Locus-imprinted PEG	Locus-imprinted PEG		serine/threonine-protein kinase HT1, putative, expressed
LOC_Os02g07800	7 DAP-specific		n.d.	n.d.	Locus-imprinted PEG		transcription factor, putative, expressed
LOC_Os02g08300	Persistent		Locus-imprinted PEG	Locus-imprinted PEG	Locus-imprinted PEG		RAD23 DNA repair protein, putative, expressed
LOC_Os02g09630	5 DAP-specific		n.d.	Locus-imprinted PEG	n.d.		GA20292-PA, putative, expressed
LOC_Os02g09650	5 and 7 DAP overlapped		n.d.	Locus-imprinted PEG	Locus-imprinted PEG		AP2 domain containing protein, expressed
LOC_Os02g09770	Persistent		Locus-imprinted PEG	Allelic imprinted PEG	Locus-imprinted PEG		abhydrolase domain-containing protein FAM108C1, putative, expressed
LOC_Os02g10100	3 and 5 DAP overlapped		Allelic imprinted PEG	Allelic imprinted PEG	n.d.		leucine-rich repeat receptor protein kinase EXS precursor, putative, expressed
LOC_Os02g10650	Persistent		Unclassified PEG	Unclassified PEG	Unclassified PEG		CRAL/TRIO domain containing protein, expressed
LOC_Os02g12840	Persistent		Locus-imprinted PEG	Allelic imprinted PEG	Allelic imprinted PEG		DEAD-box ATP-dependent RNA helicase, putative, expressed
LOC_Os02g12870	Persistent		Locus-imprinted PEG	Locus-imprinted PEG	Allelic imprinted PEG		expressed protein
LOC_Os02g14600	3 DAP-specific		Allelic imprinted PEG	n.d.	n.d.		glutelin, putative, expressed
LOC_Os02g17190	5 and 7 DAP overlapped		n.d.	Unclassified PEG	Locus-imprinted PEG		MYB family transcription factor, putative, expressed
LOC_Os02g17910	Persistent		Locus-imprinted PEG	Locus-imprinted PEG	Locus-imprinted PEG		CK1 CaseinKinase 1.4 - CK1 includes the casein kinase 1 kinases, expressed
LOC_Os02g19220	3 DAP-specific		Allelic imprinted PEG	n.d.	n.d.		expressed protein
LOC_Os07g04220	3 and 7 DAP overlapped		Allelic imprinted PEG	n.d.	Allelic imprinted PEG		wound and phytochrome signaling involved receptor like kinase, putative, expressed
LOC_Os02g21430	Persistent		Locus-imprinted PEG	Locus-imprinted PEG	Locus-imprinted PEG		AML1, putative, expressed
LOC_Os02g21460	Persistent		Allelic imprinted PEG	Locus-imprinted PEG	Locus-imprinted PEG		uncharacterized protein yqjG, putative, expressed
LOC_Os02g29040	7 DAP-specific		n.d.	n.d.	Allelic imprinted PEG		ankyrin repeat domain containing protein, putative, expressed
LOC_Os02g29110	Persistent		Unclassified PEG	Allelic imprinted PEG	Locus-imprinted PEG		ankyrin repeat family protein, putative, expressed
LOC_Os07g32412	3 and 7 DAP overlapped		Allelic imprinted PEG	n.d.	Allelic imprinted PEG		transposon protein, putative, unclassified, expressed
LOC_Os02g29140	Persistent		Locus-imprinted PEG	Allelic imprinted PEG	Locus-imprinted PEG		ankyrin, putative, expressed
LOC_Os02g29150	3 and 5 DAP overlapped		Allelic imprinted PEG	Allelic imprinted PEG	n.d.		OsFBO11 - F-box and other domain containing protein, expressed
LOC_Os02g34360	Persistent		Allelic imprinted PEG	Locus-imprinted PEG	Locus-imprinted PEG		expressed protein
LOC_Os02g34370	Persistent		Locus-imprinted PEG	Locus-imprinted PEG	Locus-imprinted PEG		expressed protein
LOC_Os02g34500	7 DAP-specific		n.d.	n.d.	Allelic imprinted PEG		expressed protein
LOC_Os02g34850	5 and 7 DAP overlapped		n.d.	Allelic imprinted PEG	Locus-imprinted PEG		histone-lysine N-methyltransferase ASHH2, putative, expressed
LOC_Os02g35010	3 and 5 DAP overlapped		Locus-imprinted PEG	Allelic imprinted PEG	n.d.		STE MEKK ste11 MAP3K.9 - STE kinases include homologs to sterile 7, sterile 11 and sterile 20 from yeast, expressed
LOC_Os02g35130	7 DAP-specific		n.d.	n.d.	Allelic imprinted PEG		AIG1, putative, expressed
LOC_Os02g35144	3 and 5 DAP overlapped		Allelic imprinted PEG	Allelic imprinted PEG	n.d.		zinc finger, C3HC4 type domain containing protein, expressed
LOC_Os02g36360	Persistent		Allelic imprinted PEG	Locus-imprinted PEG	Locus-imprinted PEG		ZOS2-11 - C2H2 zinc finger protein, expressed
LOC_Os02g36680	Persistent		Locus-imprinted PEG	Locus-imprinted PEG	Locus-imprinted PEG		expressed protein
LOC_Os02g36710	7 DAP-specific		n.d.	n.d.	Allelic imprinted PEG		SET, putative, expressed
LOC_Os02g37440	7 DAP-specific		n.d.	n.d.	Locus-imprinted PEG		expressed protein
LOC_Os02g37856	3 DAP-specific		Allelic imprinted PEG	n.d.	n.d.		expressed protein
LOC_Os02g39920	Persistent		Locus-imprinted PEG	Locus-imprinted PEG	Locus-imprinted PEG		AT hook motif family protein, expressed
LOC_Os02g40770	3 DAP-specific		Allelic imprinted PEG	n.d.	n.d.		SET domain containing protein, expressed
LOC_Os02g41610	Persistent		Locus-imprinted PEG	Locus-imprinted PEG	Locus-imprinted PEG		expressed protein
LOC_Os02g41630	5 and 7 DAP overlapped		n.d.	Unclassified PEG	Unclassified PEG		phenylalanine ammonia-lyase, putative, expressed
LOC_Os02g44102	3 DAP-specific		Allelic imprinted PEG	n.d.	n.d.		remorin C-terminal domain containing protein, putative, expressed
LOC_Os02g45344	Persistent		Allelic imprinted PEG	Allelic imprinted PEG	Allelic imprinted PEG		O-acyltransferase, putative, expressed
LOC_Os02g47950	5 and 7 DAP overlapped		n.d.	Unclassified PEG	Unclassified PEG		expressed protein
LOC_Os02g48320	3 DAP-specific		Allelic imprinted PEG	n.d.	n.d.		DNA binding protein, putative, expressed
LOC_Os10g05800	3 and 7 DAP overlapped		Allelic imprinted PEG	n.d.	Allelic imprinted PEG		F-box protein family, AtFBL4, putative, expressed
LOC_Os02g50480	3 DAP-specific		Allelic imprinted PEG	n.d.	n.d.		histidine kinase, putative, expressed
LOC_Os02g50850	5 DAP-specific		n.d.	Allelic imprinted PEG	n.d.		BAH domain containing protein, putative, expressed
LOC_Os02g50860	Persistent		Locus-imprinted PEG	Allelic imprinted PEG	Allelic imprinted PEG		ras-related protein, putative, expressed
LOC_Os02g51540	Persistent		Locus-imprinted PEG	Locus-imprinted PEG	Locus-imprinted PEG		eukaryotic aspartyl protease domain containing protein, expressed
LOC_Os02g51550	Persistent		Locus-imprinted PEG	Locus-imprinted PEG	Locus-imprinted PEG		DUF581 domain containing protein, expressed
LOC_Os02g51780	5 DAP-specific		n.d.	Allelic imprinted PEG	n.d.		ribonuclease protein, putative, expressed
LOC_Os02g51850	Persistent		Allelic imprinted PEG	Locus-imprinted PEG	Locus-imprinted PEG		OsAPRL3 adenosine 5'-phosphosulfate reductase-like OsAPRL3, expressed
LOC_Os02g51860	Persistent		Locus-imprinted PEG	Locus-imprinted PEG	Locus-imprinted PEG		dehydration response related protein, putative, expressed
LOC_Os02g52920	Persistent		Allelic imprinted PEG	Allelic imprinted PEG	Allelic imprinted PEG		emp24/gp25L/p24 family protein, putative, expressed
LOC_Os02g52960	Persistent		Locus-imprinted PEG	Locus-imprinted PEG	Locus-imprinted PEG		PHD-finger domain containing protein, putative, expressed
LOC_Os02g53740	3 and 5 DAP overlapped		Locus-imprinted PEG	Allelic imprinted PEG	n.d.		XI-I, putative, expressed
LOC_Os02g56530	Persistent		Allelic imprinted PEG	Locus-imprinted PEG	Locus-imprinted PEG		ankyrin repeat domain containing protein, expressed
LOC_Os02g56880	3 DAP-specific		Unclassified PEG	n.d.	n.d.		transcriptional corepressor LEUNIG, putative, expressed
LOC_Os02g57080	Persistent		Locus-imprinted PEG	Allelic imprinted PEG	Locus-imprinted PEG		serine/threonine-protein kinase, putative, expressed
LOC_Os02g57190	Persistent		Allelic imprinted PEG	Locus-imprinted PEG	Locus-imprinted PEG		Myosin head domain containing protein, expressed
LOC_Os02g57200	Persistent		Allelic imprinted PEG	Allelic imprinted PEG	Allelic imprinted PEG		expressed protein
LOC_Os02g57820	Persistent		Unclassified PEG	Unclassified PEG	Unclassified PEG		AT hook motif domain containing protein, expressed
LOC_Os03g02180	7 DAP-specific		n.d.	n.d.	Locus-imprinted PEG		cytochrome P450, putative, expressed
LOC_Os10g33930	3 and 7 DAP overlapped		Allelic imprinted PEG	n.d.	Allelic imprinted PEG		DUF1336 domain containing protein, expressed
LOC_Os03g03100	3 DAP-specific		Allelic imprinted PEG	n.d.	n.d.		OsMADS50 - MADS-box family gene with MIKCc type-box, expressed
LOC_Os03g03920	3 DAP-specific		Allelic imprinted PEG	n.d.	n.d.		Ubiquitin family domain containing protein, expressed
LOC_Os03g04545	5 DAP-specific		n.d.	Allelic imprinted PEG	n.d.		expressed protein
LOC_Os03g05180	5 and 7 DAP overlapped		n.d.	Unclassified PEG	Unclassified PEG		expressed protein
LOC_Os03g05480	5 and 7 DAP overlapped		n.d.	Allelic imprinted PEG	Locus-imprinted PEG		ZOS3-01 - C2H2 zinc finger protein, expressed
LOC_Os03g07080	3 DAP-specific		Locus-imprinted PEG	n.d.	n.d.		endonuclease/exonuclease/phosphatase family domain containing protein, expressed
LOC_Os03g07130	5 and 7 DAP overlapped		n.d.	Locus-imprinted PEG	Allelic imprinted PEG		RING finger protein 13, putative, expressed
LOC_Os03g09150	5 DAP-specific		n.d.	Allelic imprinted PEG	n.d.		pumilio-family RNA binding repeat domain containing protein, expressed
LOC_Os03g11550	7 DAP-specific		n.d.	n.d.	Locus-imprinted PEG		protein of unknown function DUF1675 domain containing protein, expressed
LOC_Os03g12570	3 DAP-specific		Allelic imprinted PEG	n.d.	n.d.		expressed protein
LOC_Os03g14280	5 and 7 DAP overlapped		n.d.	Allelic imprinted PEG	Allelic imprinted PEG		ATP-dependent Clp protease ATP-binding subunit, putative, expressed
LOC_Os11g09329	3 and 7 DAP overlapped		Allelic imprinted PEG	n.d.	Allelic imprinted PEG		VHS and GAT domain containing protein, expressed
LOC_Os03g15010	Persistent		Allelic imprinted PEG	Allelic imprinted PEG	Locus-imprinted PEG		transposon protein, putative, unclassified, expressed
LOC_Os03g16570	7 DAP-specific		n.d.	n.d.	Allelic imprinted PEG		zinc finger, C3HC4 type domain containing protein, expressed
LOC_Os03g16730	3 DAP-specific		Locus-imprinted PEG	n.d.	n.d.		expressed protein
LOC_Os03g17980	3 DAP-specific		Locus-imprinted PEG	n.d.	n.d.		CAMK KIN1/SNF1/Nim1 like AMPKh.2 - CAMK includes calcium/calmodulin depedent protein kinases, expressed
LOC_Os03g18080	Persistent		Allelic imprinted PEG	Locus-imprinted PEG	Locus-imprinted PEG		SacI homology domain containing protein, expressed
LOC_Os03g19920	Persistent		Locus-imprinted PEG	Locus-imprinted PEG	Locus-imprinted PEG		expressed protein
LOC_Os03g24900	Persistent		Locus-imprinted PEG	Locus-imprinted PEG	Locus-imprinted PEG		DHHC zinc finger domain containing protein, expressed
LOC_Os03g24910	3 DAP-specific		Allelic imprinted PEG	n.d.	n.d.		nodulation protein-related, putative, expressed
LOC_Os03g25070	Persistent		Locus-imprinted PEG	Locus-imprinted PEG	Locus-imprinted PEG		CAMK CAMK like.18 - CAMK includes calcium/calmodulin depedent protein kinases, expressed
LOC_Os03g25600	3 DAP-specific		Allelic imprinted PEG	n.d.	n.d.		protein phosphatase 2C, putative, expressed
LOC_Os03g27450	Persistent		Locus-imprinted PEG	Locus-imprinted PEG	Locus-imprinted PEG		ADP-ribosylation factor, putative, expressed
LOC_Os03g27460	Persistent		Locus-imprinted PEG	Locus-imprinted PEG	Locus-imprinted PEG		heat shock protein DnaJ, putative, expressed
LOC_Os03g27820	7 DAP-specific		n.d.	n.d.	Allelic imprinted PEG		expressed protein
LOC_Os03g29470	Persistent		Locus-imprinted PEG	Locus-imprinted PEG	Locus-imprinted PEG		transcription initiation factor IID, putative, expressed
LOC_Os03g31070	5 and 7 DAP overlapped		n.d.	Allelic imprinted PEG	Unclassified PEG		protein kinase, putative, expressed
LOC_Os03g33590	7 DAP-specific		n.d.	n.d.	Locus-imprinted PEG		interferon-related developmental regulator, putative, expressed
LOC_Os03g36790	Persistent		Locus-imprinted PEG	Locus-imprinted PEG	Locus-imprinted PEG		tobamovirus multiplication protein, putative, expressed
LOC_Os03g37270	7 DAP-specific		n.d.	n.d.	Allelic imprinted PEG		RNA recognition motif containing protein, putative, expressed
LOC_Os03g38970	Persistent		Allelic imprinted PEG	Locus-imprinted PEG	Locus-imprinted PEG		metal ion binding protein, putative, expressed
LOC_Os03g40930	7 DAP-specific		n.d.	n.d.	Locus-imprinted PEG		expressed protein
LOC_Os03g42050	Persistent		Allelic imprinted PEG	Allelic imprinted PEG	Allelic imprinted PEG		exportin-7-A, putative, expressed
LOC_Os03g43580	7 DAP-specific		n.d.	n.d.	Allelic imprinted PEG		IQ calmodulin-binding motif family protein, putative, expressed
LOC_Os03g43590	5 and 7 DAP overlapped		n.d.	Allelic imprinted PEG	Allelic imprinted PEG		LSTK-1-like kinase, putative, expressed
LOC_Os03g43890	Persistent		Unclassified PEG	Unclassified PEG	Unclassified PEG		WD domain, G-beta repeat domain containing protein, expressed
LOC_Os03g47686	Persistent		Locus-imprinted PEG	Locus-imprinted PEG	Locus-imprinted PEG		ankyrin, putative, expressed
LOC_Os03g47693	3 DAP-specific		Allelic imprinted PEG	n.d.	n.d.		ankyrin repeat family protein, putative, expressed
LOC_Os03g49770	3 DAP-specific		Allelic imprinted PEG	n.d.	n.d.		oxysterol-binding protein, putative, expressed
LOC_Os03g50330	Persistent		Unclassified PEG	Unclassified PEG	Unclassified PEG		CAMK KIN1/SNF1/Nim1 like.18 - CAMK includes calcium/calmodulin depedent protein kinases, expressed
LOC_Os03g50440	5 DAP-specific		n.d.	Unclassified PEG	n.d.		ubiquitin-conjugating enzyme, putative, expressed
LOC_Os03g51610	5 and 7 DAP overlapped		n.d.	Allelic imprinted PEG	Allelic imprinted PEG		Inositol 1, 3, 4-trisphosphate 5/6-kinase, putative, expressed
LOC_Os03g52594	Persistent		Locus-imprinted PEG	Locus-imprinted PEG	Locus-imprinted PEG		CCR4-NOT transcription factor, putative, expressed
LOC_Os03g53630	Persistent		Unclassified PEG	Unclassified PEG	Unclassified PEG		PHD finger family protein, putative, expressed
LOC_Os03g53770	5 DAP-specific		n.d.	Unclassified PEG	n.d.		RNA recognition motif containing protein, putative, expressed
LOC_Os03g54900	Persistent		Locus-imprinted PEG	Locus-imprinted PEG	Locus-imprinted PEG		phytosulfokine receptor precursor, putative, expressed
LOC_Os03g54910	Persistent		Unclassified PEG	Unclassified PEG	Unclassified PEG		X8 domain containing protein, expressed
LOC_Os03g55630	7 DAP-specific		n.d.	n.d.	Unclassified PEG		expressed protein
LOC_Os03g56250	Persistent		Locus-imprinted PEG	Allelic imprinted PEG	Allelic imprinted PEG		LRR receptor-like protein kinase, putative, expressed
LOC_Os03g56310	Persistent		Locus-imprinted PEG	Locus-imprinted PEG	Locus-imprinted PEG		5-nucleotidase domain-containing protein, putative, expressed
LOC_Os03g57130	7 DAP-specific		n.d.	n.d.	Unclassified PEG		expressed protein
LOC_Os03g58060	5 and 7 DAP overlapped		n.d.	Locus-imprinted PEG	Allelic imprinted PEG		XRN 5'-3' exonuclease N-terminus domain containing protein, expressed
LOC_Os03g58130	Persistent		Locus-imprinted PEG	Locus-imprinted PEG	Locus-imprinted PEG		thioredoxin, putative, expressed
LOC_Os03g59680	7 DAP-specific		n.d.	n.d.	Unclassified PEG		PAPA-1-like conserved region family protein, expressed
LOC_Os03g59740	Persistent		Unclassified PEG	Unclassified PEG	Unclassified PEG		ADP-ribosylation factor, putative, expressed
LOC_Os03g60120	3 and 5 DAP overlapped		Unclassified PEG	Unclassified PEG	n.d.		AP2 domain containing protein, expressed
LOC_Os03g60130	Persistent		Locus-imprinted PEG	Allelic imprinted PEG	Locus-imprinted PEG		transcription elongation factor protein, putative, expressed
LOC_Os03g60140	5 DAP-specific		n.d.	Allelic imprinted PEG	n.d.		U-box domain-containing protein, putative, expressed
LOC_Os03g60150	Persistent		Locus-imprinted PEG	Allelic imprinted PEG	Locus-imprinted PEG		protein kinase domain containing protein, expressed
LOC_Os03g60710	Persistent		Locus-imprinted PEG	Locus-imprinted PEG	Locus-imprinted PEG		protein kinase domain containing protein, expressed
LOC_Os03g61120	Persistent		Allelic imprinted PEG	Allelic imprinted PEG	Allelic imprinted PEG		anthranilate synthase component I-1, chloroplast precursor, putative, expressed
LOC_Os03g62660	5 and 7 DAP overlapped		n.d.	Unclassified PEG	Unclassified PEG		transposon protein, putative, unclassified, expressed
LOC_Os03g63040	Persistent		Allelic imprinted PEG	Locus-imprinted PEG	Locus-imprinted PEG		expressed protein
LOC_Os03g63770	Persistent		Allelic imprinted PEG	Allelic imprinted PEG	Allelic imprinted PEG		RCD1, putative, expressed
LOC_Os04g05010	3 DAP-specific		Allelic imprinted PEG	n.d.	n.d.		CBS domain containing membrane protein, putative, expressed
LOC_Os04g05030	Persistent		Locus-imprinted PEG	Allelic imprinted PEG	Allelic imprinted PEG		serine-rich 25 kDa antigen protein, putative, expressed
LOC_Os04g06770	Persistent		Locus-imprinted PEG	Allelic imprinted PEG	Allelic imprinted PEG		argonaute, putative, expressed
LOC_Os04g08470	Persistent		Locus-imprinted PEG	Locus-imprinted PEG	Locus-imprinted PEG		OsFBX116 - F-box domain containing protein, expressed
LOC_Os04g10680	3 DAP-specific		Allelic imprinted PEG	n.d.	n.d.		zinc finger, C3HC4 type domain containing protein, expressed
LOC_Os04g11830	5 and 7 DAP overlapped		n.d.	Locus-imprinted PEG	Locus-imprinted PEG		TCP family transcription factor, putative, expressed
LOC_Os04g17700	Persistent		Allelic imprinted PEG	Allelic imprinted PEG	Allelic imprinted PEG		kinesin heavy chain isolog, putative, expressed
LOC_Os04g20774	Persistent		Locus-imprinted PEG	Allelic imprinted PEG	Locus-imprinted PEG		pumilio-family RNA binding repeat containing protein, expressed
LOC_Os04g22240	Persistent		Locus-imprinted PEG	Locus-imprinted PEG	Locus-imprinted PEG		zinc finger, C3HC4 type domain containing protein, expressed
LOC_Os04g24410	7 DAP-specific		n.d.	n.d.	Allelic imprinted PEG		kinesin heavy chain isolog, putative, expressed
LOC_Os04g31160	3 DAP-specific		Locus-imprinted PEG	n.d.	n.d.		hypothetical protein
LOC_Os04g31170	Persistent		Locus-imprinted PEG	Locus-imprinted PEG	Locus-imprinted PEG		expressed protein
LOC_Os04g32880	Persistent		Locus-imprinted PEG	Locus-imprinted PEG	Locus-imprinted PEG		CBS domain containing membrane protein, putative, expressed
LOC_Os04g32970	Persistent		Locus-imprinted PEG	Locus-imprinted PEG	Locus-imprinted PEG		OTU-like cysteine protease family protein, putative, expressed
LOC_Os04g34440	3 DAP-specific		Allelic imprinted PEG	n.d.	n.d.		ubiquitin interaction motif-containing protein, putative, expressed
LOC_Os04g36620	Persistent		Locus-imprinted PEG	Allelic imprinted PEG	Locus-imprinted PEG		hydrolase, alpha/beta fold family domain containing protein, expressed
LOC_Os04g38550	7 DAP-specific		n.d.	n.d.	Allelic imprinted PEG		expressed protein
LOC_Os04g38950	5 DAP-specific		n.d.	Allelic imprinted PEG	n.d.		class I glutamine amidotransferase, putative, expressed
LOC_Os04g39240	5 and 7 DAP overlapped		n.d.	Locus-imprinted PEG	Allelic imprinted PEG		expressed protein
LOC_Os04g40660	Persistent		Locus-imprinted PEG	Locus-imprinted PEG	Locus-imprinted PEG		MA3 domain containing protein, expressed
LOC_Os04g41110	3 DAP-specific		Unclassified PEG	n.d.	n.d.		Rad21 / Rec8 like protein, putative, expressed
LOC_Os04g41470	Persistent		Locus-imprinted PEG	Locus-imprinted PEG	Locus-imprinted PEG		expressed protein
LOC_Os04g42230	3 DAP-specific		Locus-imprinted PEG	n.d.	n.d.		expressed protein
LOC_Os04g42250	Persistent		Locus-imprinted PEG	Locus-imprinted PEG	Locus-imprinted PEG		transferase family protein, putative, expressed
LOC_Os04g42260	Persistent		Locus-imprinted PEG	Allelic imprinted PEG	Allelic imprinted PEG		protein phosphatase 2C, putative, expressed
LOC_Os04g42600	Persistent		Unclassified PEG	Unclassified PEG	Unclassified PEG		polyadenylate-binding protein, putative, expressed
LOC_Os04g42634	Persistent		Allelic imprinted PEG	Unclassified PEG	Unclassified PEG		expressed protein
LOC_Os04g43130	5 and 7 DAP overlapped		n.d.	Unclassified PEG	Unclassified PEG		transcriptional corepressor LEUNIG, putative, expressed
LOC_Os04g44710	Persistent		Unclassified PEG	Unclassified PEG	Unclassified PEG		double-stranded RNA binding motif containing protein, expressed
LOC_Os04g46020	Persistent		Allelic imprinted PEG	Allelic imprinted PEG	Allelic imprinted PEG		GATA zinc finger domain containing protein, expressed
LOC_Os04g46450	3 DAP-specific		Locus-imprinted PEG	n.d.	n.d.		zinc finger, C3HC4 type domain containing protein, expressed
LOC_Os04g47410	7 DAP-specific		n.d.	n.d.	Unclassified PEG		DHHC zinc finger domain containing protein, expressed
LOC_Os04g49410	3 DAP-specific		Unclassified PEG	n.d.	n.d.		expansin precursor, putative, expressed
LOC_Os04g51380	Persistent		Unclassified PEG	Unclassified PEG	Unclassified PEG		protein-S-isoprenylcysteine O-methyltransferase. tax, putative, expressed
LOC_Os04g53450	5 and 7 DAP overlapped		n.d.	Allelic imprinted PEG	Locus-imprinted PEG		expressed protein
LOC_Os04g53740	3 DAP-specific		Unclassified PEG	n.d.	n.d.		thioredoxin, putative, expressed
LOC_Os04g55960	7 DAP-specific		n.d.	n.d.	Allelic imprinted PEG		NADPH reductase, putative, expressed
LOC_Os04g56720	5 and 7 DAP overlapped		n.d.	Unclassified PEG	Unclassified PEG		RCC2, putative, expressed
LOC_Os04g57640	Persistent		Unclassified PEG	Unclassified PEG	Unclassified PEG		RCD1, putative, expressed
LOC_Os04g58750	3 and 5 DAP overlapped		Locus-imprinted PEG	Allelic imprinted PEG	n.d.		protein kinase family protein, putative, expressed
LOC_Os04g59394	3 DAP-specific		Unclassified PEG	n.d.	n.d.		expressed protein
LOC_Os04g59400	3 DAP-specific		Unclassified PEG	n.d.	n.d.		expressed protein
LOC_Os05g01020	Persistent		Allelic imprinted PEG	Allelic imprinted PEG	Locus-imprinted PEG		transcriptional repressor, putative, expressed
LOC_Os05g01210	Persistent		Allelic imprinted PEG	Locus-imprinted PEG	Locus-imprinted PEG		expressed protein
LOC_Os05g01230	5 and 7 DAP overlapped		n.d.	Allelic imprinted PEG	Locus-imprinted PEG		zinc finger, C3HC4 type domain containing protein, expressed
LOC_Os05g01240	5 and 7 DAP overlapped		n.d.	Locus-imprinted PEG	Locus-imprinted PEG		AML1, putative, expressed
LOC_Os05g01710	Persistent		Allelic imprinted PEG	Allelic imprinted PEG	Locus-imprinted PEG		transcription initiation factor IIA gamma chain, putative, expressed
LOC_Os05g02260	5 DAP-specific		n.d.	Locus-imprinted PEG	n.d.		expressed protein
LOC_Os05g03630	Persistent		Locus-imprinted PEG	Locus-imprinted PEG	Locus-imprinted PEG		dnaJ domain containing protein, expressed
LOC_Os05g04330	Persistent		Locus-imprinted PEG	Locus-imprinted PEG	Locus-imprinted PEG		DNA methyltransferase protein, putative, expressed
LOC_Os05g04520	5 and 7 DAP overlapped		n.d.	Allelic imprinted PEG	Allelic imprinted PEG		protein kinase, putative, expressed
LOC_Os05g04540	5 DAP-specific		n.d.	Allelic imprinted PEG	n.d.		expressed protein
LOC_Os05g05230	3 DAP-specific		Allelic imprinted PEG	n.d.	n.d.		expressed protein
LOC_Os05g05390	3 DAP-specific		Allelic imprinted PEG	n.d.	n.d.		expressed protein
LOC_Os05g05780	Persistent		Locus-imprinted PEG	Locus-imprinted PEG	Locus-imprinted PEG		chromatin-remodeling complex ATPase chain, putative, expressed
LOC_Os05g05790	5 and 7 DAP overlapped		n.d.	Allelic imprinted PEG	Unclassified PEG		double-stranded RNA binding motif containing protein, expressed
LOC_Os05g05800	Persistent		Allelic imprinted PEG	Unclassified PEG	Locus-imprinted PEG		OsFBL21 - F-box domain and LRR containing protein, expressed
LOC_Os05g07670	7 DAP-specific		n.d.	n.d.	Allelic imprinted PEG		solute carrier family 35 member E3, putative, expressed
LOC_Os05g07720	Persistent		Unclassified PEG	Unclassified PEG	Unclassified PEG		alliin lyase precursor, putative, expressed
LOC_Os05g08730	5 DAP-specific		n.d.	Allelic imprinted PEG	n.d.		early fruit transcript, putative, expressed
LOC_Os05g08840	Persistent		Locus-imprinted PEG	Locus-imprinted PEG	Locus-imprinted PEG		DnaK family protein, putative, expressed
LOC_Os05g09620	3 DAP-specific		Allelic imprinted PEG	n.d.	n.d.		SCC3, putative, expressed
LOC_Os05g11140	Persistent		Locus-imprinted PEG	Locus-imprinted PEG	Locus-imprinted PEG		CK1 CaseinKinase 1a.5 - CK1 includes the casein kinase 1 kinases, expressed
LOC_Os05g12170	5 and 7 DAP overlapped		n.d.	Allelic imprinted PEG	Allelic imprinted PEG		plant-specific domain TIGR01589 family protein, putative, expressed
LOC_Os05g12460	3 DAP-specific		Allelic imprinted PEG	n.d.	n.d.		expressed protein
LOC_Os05g12670	5 and 7 DAP overlapped		n.d.	Locus-imprinted PEG	Locus-imprinted PEG		expressed protein
LOC_Os05g16140	3 DAP-specific		Unclassified PEG	n.d.	n.d.		expressed protein
LOC_Os05g23420	3 and 5 DAP overlapped		Unclassified PEG	Unclassified PEG	n.d.		sugar porter, putative, expressed
LOC_Os05g24000	Persistent		Unclassified PEG	Unclassified PEG	Unclassified PEG		expressed protein
LOC_Os05g27920	3 DAP-specific		Allelic imprinted PEG	n.d.	n.d.		phox domain-containing protein, putative, expressed
LOC_Os05g28180	Persistent		Locus-imprinted PEG	Locus-imprinted PEG	Locus-imprinted PEG		AMP deaminase, putative, expressed
LOC_Os05g28200	5 DAP-specific		n.d.	Allelic imprinted PEG	n.d.		prenyltransferase, putative, expressed
LOC_Os05g28440	Persistent		Locus-imprinted PEG	Allelic imprinted PEG	Allelic imprinted PEG		expressed protein
LOC_Os05g28860	Persistent		Unclassified PEG	Unclassified PEG	Unclassified PEG		3'-5' exonuclease, putative, expressed
LOC_Os05g28870	5 and 7 DAP overlapped		n.d.	Unclassified PEG	Unclassified PEG		mitochondrial carrier protein, putative, expressed
LOC_Os05g30870	3 DAP-specific		Locus-imprinted PEG	n.d.	n.d.		protein kinase domain containing protein, expressed
LOC_Os05g31254	3 DAP-specific		Allelic imprinted PEG	n.d.	n.d.		acetyltransferase, GNAT family, putative, expressed
LOC_Os05g31380	Persistent		Locus-imprinted PEG	Locus-imprinted PEG	Locus-imprinted PEG		GRAS family transcription factor containing protein, expressed
LOC_Os05g32570	5 DAP-specific		n.d.	Allelic imprinted PEG	n.d.		RING E3 ligase protein, putative, expressed
LOC_Os05g32880	3 DAP-specific		Locus-imprinted PEG	n.d.	n.d.		response regulator receiver domain containing protein, expressed
LOC_Os05g33550	3 DAP-specific		Locus-imprinted PEG	n.d.	n.d.		methyl-binding domain protein MBD, putative, expressed
LOC_Os05g34510	Persistent		Locus-imprinted PEG	Allelic imprinted PEG	Locus-imprinted PEG		expressed protein
LOC_Os05g34540	3 DAP-specific		Locus-imprinted PEG	n.d.	n.d.		rab GDP dissociation inhibitor alpha, putative, expressed
LOC_Os05g34550	3 DAP-specific		Allelic imprinted PEG	n.d.	n.d.		MLO domain containing protein, putative, expressed
LOC_Os05g38640	5 and 7 DAP overlapped		n.d.	Allelic imprinted PEG	Locus-imprinted PEG		Core histone H2A/H2B/H3/H4 domain containing protein, putative, expressed
LOC_Os05g40810	7 DAP-specific		n.d.	n.d.	Locus-imprinted PEG		BRCA1 C Terminus domain containing protein, expressed
LOC_Os05g41200	5 DAP-specific		n.d.	Unclassified PEG	n.d.		OsCML9 - Calmodulin-related calcium sensor protein, expressed
LOC_Os05g41210	Persistent		Unclassified PEG	Unclassified PEG	Unclassified PEG		OsCam2 - Calmodulin, expressed
LOC_Os05g41220	5 and 7 DAP overlapped		n.d.	Locus-imprinted PEG	Locus-imprinted PEG		SNF1-related protein kinase regulatory subunit beta-1, putative, expressed
LOC_Os05g41790	Persistent		Unclassified PEG	Unclassified PEG	Unclassified PEG		zinc finger C-x8-C-x5-C-x3-H type family protein, expressed
LOC_Os05g43480	Persistent		Locus-imprinted PEG	Locus-imprinted PEG	Locus-imprinted PEG		ubiquitin carboxyl-terminal hydrolase domain containing protein, expressed
LOC_Os05g43560	5 DAP-specific		n.d.	Allelic imprinted PEG	n.d.		AGAP007115-PA, putative, expressed
LOC_Os05g43570	Persistent		Locus-imprinted PEG	Locus-imprinted PEG	Locus-imprinted PEG		AGC AGC other NDRh TRCd.2 - ACG kinases include homologs to PKA, PKG and PKC, expressed
LOC_Os05g45060	3 DAP-specific		Allelic imprinted PEG	n.d.	n.d.		RING-H2 finger protein ATL2M, putative, expressed
LOC_Os05g45830	3 DAP-specific		Allelic imprinted PEG	n.d.	n.d.		expressed protein
LOC_Os05g45930	5 and 7 DAP overlapped		n.d.	Locus-imprinted PEG	Locus-imprinted PEG		IQ calmodulin-binding motif family protein, putative, expressed
LOC_Os05g46490	5 DAP-specific		n.d.	Allelic imprinted PEG	n.d.		mov34 family protein, putative, expressed
LOC_Os05g48280	5 and 7 DAP overlapped		n.d.	Allelic imprinted PEG	Locus-imprinted PEG		expressed protein
LOC_Os05g48560	Persistent		Locus-imprinted PEG	Locus-imprinted PEG	Locus-imprinted PEG		expressed protein
LOC_Os05g48590	5 and 7 DAP overlapped		n.d.	Allelic imprinted PEG	Locus-imprinted PEG		OsIAA19 - Auxin-responsive Aux/IAA gene family member, expressed
LOC_Os05g48970	5 and 7 DAP overlapped		n.d.	Unclassified PEG	Unclassified PEG		zinc finger, C3HC4 type domain containing protein, expressed
LOC_Os05g48980	Persistent		Locus-imprinted PEG	Locus-imprinted PEG	Locus-imprinted PEG		ras-related protein, putative, expressed
LOC_Os05g49120	3 and 5 DAP overlapped		Locus-imprinted PEG	Unclassified PEG	n.d.		NLI interacting factor-like phosphatase, putative, expressed
LOC_Os05g50960	Persistent		Allelic imprinted PEG	Allelic imprinted PEG	Allelic imprinted PEG		polygalacturonase, putative, expressed
LOC_Os05g50970	Persistent		Locus-imprinted PEG	Locus-imprinted PEG	Locus-imprinted PEG		protein phosphatase 2C, putative, expressed
LOC_Os05g51400	Persistent		Locus-imprinted PEG	Allelic imprinted PEG	Allelic imprinted PEG		protein kinase APK1B, chloroplast precursor, putative, expressed
LOC_Os06g01200	3 DAP-specific		Allelic imprinted PEG	n.d.	n.d.		zinc finger, C3HC4 type domain containing protein, expressed
LOC_Os06g01680	Persistent		Allelic imprinted PEG	Locus-imprinted PEG	Locus-imprinted PEG		expressed protein
LOC_Os06g02028	Persistent		Locus-imprinted PEG	Locus-imprinted PEG	Locus-imprinted PEG		eyes absent homolog 4, putative, expressed
LOC_Os06g12260	3 and 7 DAP overlapped		Locus-imprinted PEG	n.d.	Allelic imprinted PEG		N-rich protein, putative, expressed
LOC_Os06g03860	7 DAP-specific		n.d.	n.d.	Unclassified PEG		uncharacterized membrane protein, putative, expressed
LOC_Os06g04920	Persistent		Unclassified PEG	Unclassified PEG	Unclassified PEG		zinc finger family protein, putative, expressed
LOC_Os06g04930	Persistent		Unclassified PEG	Unclassified PEG	Unclassified PEG		expressed protein
LOC_Os06g04940	5 DAP-specific		n.d.	Unclassified PEG	n.d.		early nodulin 93 ENOD93 protein, putative, expressed
LOC_Os06g06090	3 DAP-specific		Allelic imprinted PEG	n.d.	n.d.		CGMC MAPKCMGC 2 ERK.12 - CGMC includes CDA, MAPK, GSK3, and CLKC kinases, expressed
LOC_Os06g06870	Persistent		Locus-imprinted PEG	Locus-imprinted PEG	Locus-imprinted PEG		zinc finger protein, putative, expressed
LOC_Os06g07700	Persistent		Unclassified PEG	Unclassified PEG	Unclassified PEG		expressed protein
LOC_Os06g08740	Persistent		Locus-imprinted PEG	Locus-imprinted PEG	Locus-imprinted PEG		expressed protein
LOC_Os06g10480	5 DAP-specific		n.d.	Unclassified PEG	n.d.		expressed protein
LOC_Os06g11190	7 DAP-specific		n.d.	n.d.	Allelic imprinted PEG		OsPOP13 - Putative Prolyl Oligopeptidase homologue, expressed
LOC_Os06g11620	Persistent		Locus-imprinted PEG	Locus-imprinted PEG	Locus-imprinted PEG		RNA recognition motif containing protein, putative, expressed
LOC_Os02g49150	3 and 7 DAP overlapped		Allelic imprinted PEG	n.d.	Locus-imprinted PEG		RNA polymerase Rpb4, putative, expressed
LOC_Os06g12280	5 and 7 DAP overlapped		n.d.	Unclassified PEG	Unclassified PEG		glycosyl transferase 8 domain containing protein, putative, expressed
LOC_Os06g12590	Persistent		Locus-imprinted PEG	Locus-imprinted PEG	Locus-imprinted PEG		protein kinase, putative, expressed
LOC_Os06g12680	3 and 5 DAP overlapped		Unclassified PEG	Unclassified PEG	n.d.		RING-H2 finger protein, putative, expressed
LOC_Os06g14440	5 and 7 DAP overlapped		n.d.	Allelic imprinted PEG	Allelic imprinted PEG		DRD1, putative, expressed
LOC_Os06g19650	5 and 7 DAP overlapped		n.d.	Allelic imprinted PEG	Locus-imprinted PEG		expressed protein
LOC_Os06g19660	5 and 7 DAP overlapped		n.d.	Allelic imprinted PEG	Allelic imprinted PEG		WD domain, G-beta repeat domain containing protein, expressed
LOC_Os06g21600	Persistent		Allelic imprinted PEG	Allelic imprinted PEG	Locus-imprinted PEG		selenoprotein O, putative, expressed
LOC_Os06g21900	5 and 7 DAP overlapped		n.d.	Locus-imprinted PEG	Locus-imprinted PEG		expressed protein
LOC_Os06g23460	Persistent		Locus-imprinted PEG	Locus-imprinted PEG	Locus-imprinted PEG		KH domain containing protein, putative, expressed
LOC_Os06g28820	Persistent		Allelic imprinted PEG	Unclassified PEG	Unclassified PEG		cycloartenol synthase, putative, expressed
LOC_Os06g30060	Persistent		Locus-imprinted PEG	Locus-imprinted PEG	Locus-imprinted PEG		expressed protein
LOC_Os06g35030	5 DAP-specific		n.d.	Allelic imprinted PEG	n.d.		RNA recognition motif containing protein, putative, expressed
LOC_Os06g35160	Persistent		Locus-imprinted PEG	Allelic imprinted PEG	Allelic imprinted PEG		CAMK KIN1/SNF1/Nim1 like.26 - CAMK includes calcium/calmodulin depedent protein kinases, expressed
LOC_Os06g35530	Persistent		Locus-imprinted PEG	Locus-imprinted PEG	Locus-imprinted PEG		CGMC GSK.8 - CGMC includes CDA, MAPK, GSK3, and CLKC kinases, expressed
LOC_Os06g37160	7 DAP-specific		n.d.	n.d.	Unclassified PEG		transmembrane 9 superfamily member, putative, expressed
LOC_Os06g37640	7 DAP-specific		n.d.	n.d.	Allelic imprinted PEG		expressed protein
LOC_Os06g37660	7 DAP-specific		n.d.	n.d.	Allelic imprinted PEG		OsPP2Ac-1 - Phosphatase 2A isoform 1 belonging to family 1, expressed
LOC_Os06g40490	Persistent		Locus-imprinted PEG	Locus-imprinted PEG	Locus-imprinted PEG		glycosyl hydrolases family 17, putative, expressed
LOC_Os06g42910	3 DAP-specific		Locus-imprinted PEG	n.d.	n.d.		expressed protein
LOC_Os06g42990	3 and 5 DAP overlapped		Locus-imprinted PEG	Locus-imprinted PEG	n.d.		AP2 domain containing protein, expressed
LOC_Os06g45000	Persistent		Allelic imprinted PEG	Allelic imprinted PEG	Locus-imprinted PEG		ubiquitin-conjugating enzyme, putative, expressed
LOC_Os06g47290	Persistent		Allelic imprinted PEG	Allelic imprinted PEG	Locus-imprinted PEG		growth regulator related protein, putative, expressed
LOC_Os06g47294	5 and 7 DAP overlapped		n.d.	Allelic imprinted PEG	Allelic imprinted PEG		methyltransferase, putative, expressed
LOC_Os06g47830	3 DAP-specific		Allelic imprinted PEG	n.d.	n.d.		RPA2C - Putative single-stranded DNA binding complex subunit 2, expressed
LOC_Os07g01460	3 DAP-specific		Allelic imprinted PEG	n.d.	n.d.		expressed protein
LOC_Os07g01940	7 DAP-specific		n.d.	n.d.	Unclassified PEG		sister chromatid cohesion 2, putative, expressed
LOC_Os07g02280	5 DAP-specific		n.d.	Unclassified PEG	n.d.		pentatricopeptide, putative, expressed
LOC_Os07g02290	3 DAP-specific		Unclassified PEG	n.d.	n.d.		OsFBX208 - F-box domain containing protein, expressed
LOC_Os07g12630	3 and 7 DAP overlapped		Allelic imprinted PEG	n.d.	Locus-imprinted PEG		transcription elongation factor protein, putative, expressed
LOC_Os07g06610	Persistent		Locus-imprinted PEG	Locus-imprinted PEG	Locus-imprinted PEG		ubiquitin carboxyl-terminal hydrolase domain containing protein, expressed
LOC_Os07g06980	Persistent		Unclassified PEG	Unclassified PEG	Unclassified PEG		histone deacetylase, putative, expressed
LOC_Os07g12490	Persistent		Locus-imprinted PEG	Locus-imprinted PEG	Locus-imprinted PEG		KH domain containing protein, putative, expressed
LOC_Os07g12510	7 DAP-specific		n.d.	n.d.	Allelic imprinted PEG		AP2 domain containing protein, expressed
LOC_Os02g29130	3 and 7 DAP overlapped		Locus-imprinted PEG	n.d.	Unclassified PEG		ankyrin, putative, expressed
LOC_Os07g17210	Persistent		Allelic imprinted PEG	Allelic imprinted PEG	Locus-imprinted PEG		FAS1, putative, expressed
LOC_Os07g17360	7 DAP-specific		n.d.	n.d.	Locus-imprinted PEG		transposon protein, putative, unclassified, expressed
LOC_Os07g17460	Persistent		Locus-imprinted PEG	Locus-imprinted PEG	Locus-imprinted PEG		OsFBL36 - F-box domain and LRR containing protein, expressed
LOC_Os07g17520	5 DAP-specific		n.d.	Unclassified PEG	n.d.		expressed protein
LOC_Os07g18610	3 DAP-specific		Allelic imprinted PEG	n.d.	n.d.		OsFBLD7 - F-box, LRR and FBD domain containing protein, expressed
LOC_Os07g18670	3 DAP-specific		Locus-imprinted PEG	n.d.	n.d.		expressed protein
LOC_Os07g18720	Persistent		Locus-imprinted PEG	Locus-imprinted PEG	Locus-imprinted PEG		tetratricopeptide repeat containing protein, putative, expressed
LOC_Os07g27110	Persistent		Locus-imprinted PEG	Locus-imprinted PEG	Locus-imprinted PEG		RNA recognition motif containing protein, expressed
LOC_Os07g27150	5 DAP-specific		n.d.	Allelic imprinted PEG	n.d.		trafficking protein particle complex subunit 4, putative, expressed
LOC_Os07g27300	Persistent		Locus-imprinted PEG	Locus-imprinted PEG	Locus-imprinted PEG		RNA-binding protein Luc7-like, putative, expressed
LOC_Os07g27430	3 DAP-specific		Allelic imprinted PEG	n.d.	n.d.		expressed protein
LOC_Os07g27450	Persistent		Locus-imprinted PEG	Allelic imprinted PEG	Locus-imprinted PEG		expressed protein
LOC_Os03g03070	3 and 7 DAP overlapped		Locus-imprinted PEG	n.d.	Unclassified PEG		transcription factor, putative, expressed
LOC_Os07g32450	7 DAP-specific		n.d.	n.d.	Allelic imprinted PEG		protein kinase PKN/PRK1, effector, putative, expressed
LOC_Os07g32774	Persistent		Locus-imprinted PEG	Allelic imprinted PEG	Locus-imprinted PEG		chorismate mutase/prephenate dehydratase, putative, expressed
LOC_Os07g38080	7 DAP-specific		n.d.	n.d.	Locus-imprinted PEG		homeodomain-like, putative, expressed
LOC_Os07g39400	3 DAP-specific		Locus-imprinted PEG	n.d.	n.d.		polyol transporter 5, putative, expressed
LOC_Os07g41160	3 and 5 DAP overlapped		Allelic imprinted PEG	Allelic imprinted PEG	n.d.		protein of unknown function DUF1675 domain containing protein, expressed
LOC_Os07g41240	3 DAP-specific		Unclassified PEG	n.d.	n.d.		cytochrome P450, putative, expressed
LOC_Os07g42180	3 DAP-specific		Allelic imprinted PEG	n.d.	n.d.		exportin 1, putative, expressed
LOC_Os07g42760	3 DAP-specific		Locus-imprinted PEG	n.d.	n.d.		expressed protein
LOC_Os07g42770	Persistent		Allelic imprinted PEG	Locus-imprinted PEG	Locus-imprinted PEG		CAMK CAMK like.35 - CAMK includes calcium/calmodulin depedent protein kinases, expressed
LOC_Os07g43160	Persistent		Locus-imprinted PEG	Locus-imprinted PEG	Allelic imprinted PEG		uncharacterized glycosyl hydrolase Rv2006/MT2062, putative, expressed
LOC_Os07g45064	3 and 5 DAP overlapped		Allelic imprinted PEG	Unclassified PEG	n.d.		Phosphatidylinositol kinase and FAT containing domain protein, putative, expressed
LOC_Os07g45070	Persistent		Allelic imprinted PEG	Locus-imprinted PEG	Allelic imprinted PEG		FAT domain-containing protein, putative, expressed
LOC_Os07g45400	Persistent		Locus-imprinted PEG	Allelic imprinted PEG	Allelic imprinted PEG		expressed protein
LOC_Os07g48160	5 and 7 DAP overlapped		n.d.	Locus-imprinted PEG	Allelic imprinted PEG		alpha-galactosidase precursor, putative, expressed
LOC_Os07g48170	Persistent		Locus-imprinted PEG	Locus-imprinted PEG	Locus-imprinted PEG		nucleotidyltransferase, putative, expressed
LOC_Os07g48180	5 and 7 DAP overlapped		n.d.	Locus-imprinted PEG	Locus-imprinted PEG		bZIP transcription factor domain containing protein, expressed
LOC_Os07g48229	7 DAP-specific		n.d.	n.d.	Allelic imprinted PEG		vacuolar-sorting receptor precursor, putative, expressed
LOC_Os07g48260	3 DAP-specific		Locus-imprinted PEG	n.d.	n.d.		WRKY47, expressed
LOC_Os07g49460	5 DAP-specific		n.d.	Allelic imprinted PEG	n.d.		response regulator receiver domain containing protein, expressed
LOC_Os08g01040	5 and 7 DAP overlapped		n.d.	Locus-imprinted PEG	Locus-imprinted PEG		zinc finger, C3HC4 type domain containing protein, expressed
LOC_Os08g01054	Persistent		Locus-imprinted PEG	Locus-imprinted PEG	Locus-imprinted PEG		retrotransposon protein, putative, unclassified, expressed
LOC_Os08g01680	3 and 5 DAP overlapped		Locus-imprinted PEG	Allelic imprinted PEG	n.d.		WD domain, G-beta repeat domain containing protein, expressed
LOC_Os08g01900	7 DAP-specific		n.d.	n.d.	Allelic imprinted PEG		armadillo/beta-catenin repeat family protein, putative, expressed
LOC_Os08g06420	3 and 5 DAP overlapped		Locus-imprinted PEG	Allelic imprinted PEG	n.d.		abhydrolase domain-containing protein FAM108C1, putative, expressed
LOC_Os08g08000	Persistent		Locus-imprinted PEG	Locus-imprinted PEG	Locus-imprinted PEG		DNA binding protein, putative, expressed
LOC_Os08g09570	3 DAP-specific		Allelic imprinted PEG	n.d.	n.d.		expressed protein
LOC_Os08g12750	5 and 7 DAP overlapped		n.d.	Allelic imprinted PEG	Allelic imprinted PEG		serine/threonine-protein kinase HT1, putative, expressed
LOC_Os08g13110	Persistent		Allelic imprinted PEG	Locus-imprinted PEG	Allelic imprinted PEG		hypothetical protein
LOC_Os08g13130	3 DAP-specific		Allelic imprinted PEG	n.d.	n.d.		expressed protein
LOC_Os08g13350	Persistent		Allelic imprinted PEG	Locus-imprinted PEG	Locus-imprinted PEG		expressed protein
LOC_Os08g24400	Persistent		Locus-imprinted PEG	Locus-imprinted PEG	Locus-imprinted PEG		SWP, putative, expressed
LOC_Os08g24420	Persistent		Locus-imprinted PEG	Locus-imprinted PEG	Locus-imprinted PEG		SWP, putative, expressed
LOC_Os08g24946	7 DAP-specific		n.d.	n.d.	Allelic imprinted PEG		EDM2, putative, expressed
LOC_Os08g27240	Persistent		Allelic imprinted PEG	Locus-imprinted PEG	Locus-imprinted PEG		ARID/BRIGHT DNA-binding domain containing protein, expressed
LOC_Os08g27860	Persistent		Locus-imprinted PEG	Locus-imprinted PEG	Locus-imprinted PEG		EARLY flowering protein, putative, expressed
LOC_Os08g29520	5 and 7 DAP overlapped		n.d.	Allelic imprinted PEG	Allelic imprinted PEG		cytochrome b561, putative, expressed
LOC_Os08g33390	5 DAP-specific		n.d.	Allelic imprinted PEG	n.d.		Regulator of chromosome condensation domain containing protein, expressed
LOC_Os08g35000	5 DAP-specific		n.d.	Allelic imprinted PEG	n.d.		ARID/BRIGHT DNA-binding domain containing protein, expressed
LOC_Os08g35050	Persistent		Allelic imprinted PEG	Locus-imprinted PEG	Locus-imprinted PEG		ARID/BRIGHT DNA-binding domain containing protein, expressed
LOC_Os08g40620	Persistent		Locus-imprinted PEG	Locus-imprinted PEG	Locus-imprinted PEG		rabGAP/TBC domain-containing protein, putative, expressed
LOC_Os08g40820	Persistent		Unclassified PEG	Unclassified PEG	Unclassified PEG		expressed protein
LOC_Os08g41700	Persistent		Allelic imprinted PEG	Locus-imprinted PEG	Locus-imprinted PEG		expressed protein
LOC_Os08g41710	Persistent		Locus-imprinted PEG	Locus-imprinted PEG	Locus-imprinted PEG		FHA domain containing protein, putative, expressed
LOC_Os08g41790	Persistent		Unclassified PEG	Unclassified PEG	Unclassified PEG		phosphoribulokinase/Uridine kinase family protein, expressed
LOC_Os08g42640	Persistent		Locus-imprinted PEG	Locus-imprinted PEG	Locus-imprinted PEG		zinc finger, C3HC4 type domain containing protein, expressed
LOC_Os08g42980	Persistent		Allelic imprinted PEG	Locus-imprinted PEG	Locus-imprinted PEG		la domain containing protein, expressed
LOC_Os08g43380	3 DAP-specific		Unclassified PEG	n.d.	n.d.		TBC domain containing protein, expressed
LOC_Os08g44860	5 DAP-specific		n.d.	Locus-imprinted PEG	n.d.		aminopeptidase, putative, expressed
LOC_Os08g45130	Persistent		Locus-imprinted PEG	Allelic imprinted PEG	Unclassified PEG		histone-lysine N-methyltransferase, putative, expressed
LOC_Os09g02780	3 DAP-specific		Locus-imprinted PEG	n.d.	n.d.		OsMADS77 - MADS-box family gene with M-alpha type-box, expressed
LOC_Os09g02790	3 DAP-specific		Locus-imprinted PEG	n.d.	n.d.		zinc-binding protein, putative, expressed
LOC_Os09g03080	3 DAP-specific		Allelic imprinted PEG	n.d.	n.d.		conserved hypothetical protein
LOC_Os09g03090	Persistent		Locus-imprinted PEG	Locus-imprinted PEG	Locus-imprinted PEG		expressed protein
LOC_Os09g03630	3 DAP-specific		Locus-imprinted PEG	n.d.	n.d.		ankyrin, putative, expressed
LOC_Os09g06230	7 DAP-specific		n.d.	n.d.	Allelic imprinted PEG		serine/threonine-protein kinase 16, putative, expressed
LOC_Os09g11760	5 and 7 DAP overlapped		n.d.	Unclassified PEG	Locus-imprinted PEG		expressed protein
LOC_Os09g14680	Persistent		Unclassified PEG	Unclassified PEG	Unclassified PEG		expressed protein
LOC_Os09g16520	Persistent		Allelic imprinted PEG	Locus-imprinted PEG	Locus-imprinted PEG		cytochrome b5-like Heme/Steroid binding domain containing protein, expressed
LOC_Os09g20010	Persistent		Locus-imprinted PEG	Locus-imprinted PEG	Locus-imprinted PEG		SNF1-related protein kinase regulatory subunit beta-2, putative, expressed
LOC_Os09g20340	Persistent		Unclassified PEG	Unclassified PEG	Unclassified PEG		DUF630/DUF632 domains containing protein, putative, expressed
LOC_Os09g20650	Persistent		Locus-imprinted PEG	Locus-imprinted PEG	Locus-imprinted PEG		OsFBX323 - F-box domain containing protein, expressed
LOC_Os09g23690	Persistent		Locus-imprinted PEG	Allelic imprinted PEG	Allelic imprinted PEG		UBX domain containing protein, expressed
LOC_Os09g23720	5 DAP-specific		n.d.	Allelic imprinted PEG	n.d.		expressed protein
LOC_Os09g28940	Persistent		Allelic imprinted PEG	Locus-imprinted PEG	Locus-imprinted PEG		ubiquitin carboxyl-terminal hydrolase domain containing protein, expressed
LOC_Os09g29050	3 DAP-specific		Locus-imprinted PEG	n.d.	n.d.		mitochondrial carrier protein, putative, expressed
LOC_Os09g32540	3 and 5 DAP overlapped		Allelic imprinted PEG	Allelic imprinted PEG	n.d.		expressed protein
LOC_Os09g32750	Persistent		Locus-imprinted PEG	Allelic imprinted PEG	Locus-imprinted PEG		FHA domain containing protein, putative, expressed
LOC_Os09g34950	Persistent		Locus-imprinted PEG	Locus-imprinted PEG	Locus-imprinted PEG		TCP family transcription factor, putative, expressed
LOC_Os09g35830	7 DAP-specific		n.d.	n.d.	Unclassified PEG		RNA recognition motif containing protein, putative, expressed
LOC_Os09g35850	Persistent		Unclassified PEG	Unclassified PEG	Unclassified PEG		RNA recognition motif containing protein, putative, expressed
LOC_Os09g38268	3 DAP-specific		Allelic imprinted PEG	n.d.	n.d.		RNA polymerase IV largest subunit, putative, expressed
LOC_Os10g01480	Persistent		Locus-imprinted PEG	Locus-imprinted PEG	Locus-imprinted PEG		Inositol 1, 3, 4-trisphosphate 5/6-kinase, putative, expressed
LOC_Os10g04600	7 DAP-specific		n.d.	n.d.	Allelic imprinted PEG		OsFBX359 - F-box domain containing protein, expressed
LOC_Os10g04610	7 DAP-specific		n.d.	n.d.	Unclassified PEG		OsFBX360 - F-box domain containing protein, expressed
LOC_Os10g04860	3 DAP-specific		Allelic imprinted PEG	n.d.	n.d.		aldehyde oxidase, putative, expressed
LOC_Os10g04890	Persistent		Locus-imprinted PEG	Locus-imprinted PEG	Locus-imprinted PEG		expressed protein
LOC_Os10g04900	5 and 7 DAP overlapped		n.d.	Locus-imprinted PEG	Locus-imprinted PEG		OsFBX364 - F-box domain containing protein, expressed
LOC_Os10g04980	Persistent		Locus-imprinted PEG	Locus-imprinted PEG	Locus-imprinted PEG		OsFBX365 - F-box domain containing protein, expressed
LOC_Os10g05500	Persistent		Locus-imprinted PEG	Locus-imprinted PEG	Locus-imprinted PEG		OsFBX370 - F-box domain containing protein, expressed
LOC_Os10g05520	Persistent		Locus-imprinted PEG	Locus-imprinted PEG	Unclassified PEG		OsFBX371 - F-box domain containing protein, expressed
LOC_Os10g05530	7 DAP-specific		n.d.	n.d.	Unclassified PEG		OsFBX372 - F-box domain containing protein, expressed
LOC_Os10g05540	3 DAP-specific		Allelic imprinted PEG	n.d.	n.d.		OsFBX373 - F-box domain containing protein, expressed
LOC_Os10g26520	3 and 7 DAP overlapped		Locus-imprinted PEG	n.d.	Unclassified PEG		protein kinase domain containing protein, expressed
LOC_Os10g11034	5 DAP-specific		n.d.	Allelic imprinted PEG	n.d.		caffeine-induced death protein 1, putative, expressed
LOC_Os10g11260	Persistent		Locus-imprinted PEG	Locus-imprinted PEG	Locus-imprinted PEG		ubiquitin-conjugating enzyme, putative, expressed
LOC_Os10g19860	3 DAP-specific		Allelic imprinted PEG	n.d.	n.d.		XI-I, putative, expressed
LOC_Os10g20960	3 DAP-specific		Locus-imprinted PEG	n.d.	n.d.		retrotransposon protein, putative, unclassified, expressed
LOC_Os10g21810	5 DAP-specific		n.d.	Allelic imprinted PEG	n.d.		histidine kinase, putative, expressed
LOC_Os01g34890	3 and 7 DAP overlapped		Unclassified PEG	n.d.	Unclassified PEG		GLUCAN SYNTHASE-LIKE protein, putative, expressed
LOC_Os10g28360	7 DAP-specific		n.d.	n.d.	Allelic imprinted PEG		1,2-dihydroxy-3-keto-5-methylthiopentene dioxygenase protein, putative, expressed
LOC_Os10g29549	7 DAP-specific		n.d.	n.d.	Allelic imprinted PEG		expressed protein
LOC_Os02g20394	3 and 7 DAP overlapped		Unclassified PEG	n.d.	Unclassified PEG		dnaJ domain containing protein, expressed
LOC_Os10g35220	Persistent		Allelic imprinted PEG	Locus-imprinted PEG	Locus-imprinted PEG		KH domain containing protein, putative, expressed
LOC_Os10g36710	Persistent		Locus-imprinted PEG	Locus-imprinted PEG	Locus-imprinted PEG		CAMK CAMK like.40 - CAMK includes calcium/calmodulin depedent protein kinases, expressed
LOC_Os10g37540	Persistent		Locus-imprinted PEG	Locus-imprinted PEG	Allelic imprinted PEG		OsFBDUF48 - F-box and DUF domain containing protein, expressed
LOC_Os10g39780	Persistent		Locus-imprinted PEG	Locus-imprinted PEG	Locus-imprinted PEG		protein phosphatase 2C, putative, expressed
LOC_Os10g41370	5 DAP-specific		n.d.	Unclassified PEG	n.d.		WD repeat-containing protein 8, putative, expressed
LOC_Os10g42690	Persistent		Locus-imprinted PEG	Locus-imprinted PEG	Locus-imprinted PEG		jmjC domain containing protein, expressed
LOC_Os11g03900	3 DAP-specific		Allelic imprinted PEG	n.d.	n.d.		glucosamine--fructose-6-phosphate aminotransferase 1, putative, expressed
LOC_Os11g05010	Persistent		Locus-imprinted PEG	Locus-imprinted PEG	Locus-imprinted PEG		heavy-metal-associated domain-containing protein, putative, expressed
LOC_Os11g06070	3 DAP-specific		Unclassified PEG	n.d.	n.d.		expressed protein
LOC_Os11g06580	Persistent		Allelic imprinted PEG	Locus-imprinted PEG	Allelic imprinted PEG		OsFBX397 - F-box domain containing protein, expressed
LOC_Os11g07910	Persistent		Locus-imprinted PEG	Locus-imprinted PEG	Locus-imprinted PEG		transmembrane 9 superfamily member, putative, expressed
LOC_Os11g08410	3 DAP-specific		Allelic imprinted PEG	n.d.	n.d.		GATA zinc finger domain containing protein, expressed
LOC_Os11g09160	7 DAP-specific		n.d.	n.d.	Allelic imprinted PEG		B3 DNA binding domain containing protein, expressed
LOC_Os06g03770	3 and 7 DAP overlapped		Unclassified PEG	n.d.	Unclassified PEG		ABC transporter, ATP-binding protein, putative, expressed
LOC_Os11g10060	3 DAP-specific		Allelic imprinted PEG	n.d.	n.d.		transcriptional corepressor SEUSS, putative, expressed
LOC_Os11g10070	3 DAP-specific		Locus-imprinted PEG	n.d.	n.d.		transcriptional corepressor SEUSS, putative, expressed
LOC_Os11g13694	5 and 7 DAP overlapped		n.d.	Unclassified PEG	Unclassified PEG		AGAP007117-PA, putative, expressed
LOC_Os11g14300	7 DAP-specific		n.d.	n.d.	Allelic imprinted PEG		la domain containing protein, expressed
LOC_Os11g18170	3 DAP-specific		Allelic imprinted PEG	n.d.	n.d.		glutathione peroxidase, putative, expressed
LOC_Os11g30790	7 DAP-specific		n.d.	n.d.	Allelic imprinted PEG		expressed protein
LOC_Os11g31330	Persistent		Locus-imprinted PEG	Locus-imprinted PEG	Locus-imprinted PEG		no apical meristem protein, putative, expressed
LOC_Os11g31340	Persistent		Locus-imprinted PEG	Locus-imprinted PEG	Locus-imprinted PEG		no apical meristem protein, putative, expressed
LOC_Os11g31360	Persistent		Locus-imprinted PEG	Locus-imprinted PEG	Locus-imprinted PEG		no apical meristem protein, putative, expressed
LOC_Os11g31380	Persistent		Locus-imprinted PEG	Locus-imprinted PEG	Locus-imprinted PEG		no apical meristem protein, putative, expressed
LOC_Os11g31500	5 DAP-specific		n.d.	Allelic imprinted PEG	n.d.		ATP binding protein, putative, expressed
LOC_Os11g34190	Persistent		Locus-imprinted PEG	Allelic imprinted PEG	Allelic imprinted PEG		expressed protein
LOC_Os11g36470	Persistent		Locus-imprinted PEG	Allelic imprinted PEG	Allelic imprinted PEG		ubiquitin carboxyl-terminal hydrolase 21, putative, expressed
LOC_Os11g37230	3 DAP-specific		Locus-imprinted PEG	n.d.	n.d.		zinc finger, C3HC4 type domain containing protein, expressed
LOC_Os11g37520	Persistent		Allelic imprinted PEG	Allelic imprinted PEG	Locus-imprinted PEG		BTBT3 - Bric-a-Brac, Tramtrack, Broad Complex BTB domain with tetratricopeptide repeats, expressed
LOC_Os11g37890	Persistent		Locus-imprinted PEG	Locus-imprinted PEG	Allelic imprinted PEG		NAD dependent epimerase/dehydratase family protein, putative, expressed
LOC_Os11g38900	Persistent		Locus-imprinted PEG	Locus-imprinted PEG	Locus-imprinted PEG		histone-lysine N-methyltransferase, H3 lysine-9 specific SUVH1, putative, expressed
LOC_Os11g38980	Persistent		Locus-imprinted PEG	Locus-imprinted PEG	Locus-imprinted PEG		F-box/Kelch-repeat protein, putative, expressed
LOC_Os11g45590	5 and 7 DAP overlapped		n.d.	Locus-imprinted PEG	Locus-imprinted PEG		transposon protein, putative, CACTA, En/Spm sub-class, expressed
LOC_Os12g02130	3 DAP-specific		Allelic imprinted PEG	n.d.	n.d.		expressed protein
LOC_Os12g02280	3 DAP-specific		Allelic imprinted PEG	n.d.	n.d.		pentatricopeptide, putative, expressed
LOC_Os12g02440	Persistent		Allelic imprinted PEG	Allelic imprinted PEG	Allelic imprinted PEG		WRKY95, expressed
LOC_Os12g05040	Persistent		Locus-imprinted PEG	Locus-imprinted PEG	Locus-imprinted PEG		heavy-metal-associated domain-containing protein, putative, expressed
LOC_Os12g06180	Persistent		Unclassified PEG	Unclassified PEG	Unclassified PEG		HVA22, putative, expressed
LOC_Os12g06190	5 DAP-specific		n.d.	Unclassified PEG	n.d.		expressed protein
LOC_Os12g06630	3 and 5 DAP overlapped		Locus-imprinted PEG	Allelic imprinted PEG	n.d.		OsFBT14 - F-box and tubby domain containing protein, expressed
LOC_Os12g07120	Persistent		Locus-imprinted PEG	Locus-imprinted PEG	Locus-imprinted PEG		GATA zinc finger domain containing protein, expressed
LOC_Os12g08780	Persistent		Unclassified PEG	Unclassified PEG	Unclassified PEG		flavin monooxygenase, putative, expressed
LOC_Os12g08810	3 DAP-specific		Unclassified PEG	n.d.	n.d.		VTC2, putative, expressed
LOC_Os12g18810	3 and 7 DAP overlapped		Unclassified PEG	n.d.	Unclassified PEG		expressed protein
LOC_Os12g18860	3 DAP-specific		Unclassified PEG	n.d.	n.d.		OsPOP23 - Putative Prolyl Oligopeptidase homologue, expressed
LOC_Os12g19290	Persistent		Locus-imprinted PEG	Allelic imprinted PEG	Locus-imprinted PEG		AGC AGC other NDRh TRCd.4 - ACG kinases include homologs to PKA, PKG and PKC, expressed
LOC_Os12g31350	Persistent		Locus-imprinted PEG	Locus-imprinted PEG	Locus-imprinted PEG		SSXT protein, putative, expressed
LOC_Os12g32050	3 DAP-specific		Allelic imprinted PEG	n.d.	n.d.		expressed protein
LOC_Os12g32060	Persistent		Locus-imprinted PEG	Allelic imprinted PEG	Allelic imprinted PEG		expressed protein
LOC_Os12g32080	Persistent		Locus-imprinted PEG	Locus-imprinted PEG	Locus-imprinted PEG		expressed protein
LOC_Os12g32150	Persistent		Locus-imprinted PEG	Locus-imprinted PEG	Locus-imprinted PEG		expressed protein
LOC_Os12g32170	Persistent		Locus-imprinted PEG	Locus-imprinted PEG	Allelic imprinted PEG		expressed protein
LOC_Os12g32180	Persistent		Locus-imprinted PEG	Locus-imprinted PEG	Locus-imprinted PEG		cornichon protein, putative, expressed
LOC_Os12g32250	Persistent		Allelic imprinted PEG	Unclassified PEG	Unclassified PEG		WRKY96, expressed
LOC_Os12g32630	7 DAP-specific		n.d.	n.d.	Locus-imprinted PEG		OsFBX448 - F-box domain containing protein, expressed
LOC_Os12g36180	7 DAP-specific		n.d.	n.d.	Allelic imprinted PEG		auxilin, putative, expressed
LOC_Os12g36720	7 DAP-specific		n.d.	n.d.	Unclassified PEG		RGH1A, putative, expressed
LOC_Os12g36950	Persistent		Unclassified PEG	Unclassified PEG	Unclassified PEG		CTP synthase, putative, expressed
LOC_Os12g37860	Persistent		Locus-imprinted PEG	Locus-imprinted PEG	Locus-imprinted PEG		expressed protein
LOC_Os12g38580	3 and 5 DAP overlapped		Locus-imprinted PEG	Locus-imprinted PEG	n.d.		hypothetical protein
LOC_Os12g38590	Persistent		Locus-imprinted PEG	Locus-imprinted PEG	Locus-imprinted PEG		pumilio-family RNA binding repeat containing protein, expressed
LOC_Os12g39420	Persistent		Locus-imprinted PEG	Locus-imprinted PEG	Locus-imprinted PEG		nucleobase-ascorbate transporter, putative, expressed
LOC_Os12g39660	3 DAP-specific		Allelic imprinted PEG	n.d.	n.d.		calcium-transporting ATPase, plasma membrane-type, putative, expressed
LOC_Os12g40190	Persistent		Allelic imprinted PEG	Allelic imprinted PEG	Allelic imprinted PEG		G-protein alpha subunit, putative, expressed
LOC_Os12g40510	Persistent		Locus-imprinted PEG	Locus-imprinted PEG	Locus-imprinted PEG		calcineurin B, putative, expressed
LOC_Os12g40520	Persistent		Locus-imprinted PEG	Locus-imprinted PEG	Locus-imprinted PEG		MATH domain containing protein, expressed
LOC_Os12g41956	3 and 5 DAP overlapped		Allelic imprinted PEG	Allelic imprinted PEG	n.d.		galactosyltransferase family protein, putative, expressed
LOC_Os12g42300	7 DAP-specific		n.d.	n.d.	Unclassified PEG		potasium efflux antiporter protein, putative, expressed
LOC_Os12g42310	Persistent		Locus-imprinted PEG	Allelic imprinted PEG	Unclassified PEG		serine/threonine-protein phosphatase BSL2, putative, expressed
