# Supplementary material for: Multi-layered epigenetic control of persistent and stage-specific imprinted genes in rice endosperm
Source: Research Square preprint supplement (doi:10.21203/rs.3.rs-2403620/v1), 2023-01-11
Supplement: Supplementary file 10 [file Supplementary Data 4.xlsx]

## Sheet: Reported MEGs
Supplementary Data 4. Comparative list of the reported imprinted genes.
locus_name	Our data sets		Reported imprinted genes						Re-analysis			MSU annotation
	Class of imprinted genes		Luo et al. 2011	Yuan et al. 2017	Cheng et al. 2018	Yang et al., 2020	Rodrigues et al. 2021		Yuan et al. 2017	Rodrigues et al. 2021
LOC_Os01g02050	Persistent PEG		n.d.	PEG	PEG	n.d.	n.d.		PEG	PEG		phosphoenolpyruvate carboxylase, putative, expressed
LOC_Os01g02870	5 DAP-specific MEG		n.d.	n.d.	n.d.	n.d.	n.d.		n.d.	n.d.		auxin-induced protein 5NG4, putative, expressed
LOC_Os01g03144	Persistent PEG		n.d.	n.d.	n.d.	n.d.	n.d.		n.d.	n.d.		white-brown complex homolog protein 7, putative, expressed
LOC_Os01g04350	7 DAP-specific MEG		n.d.	n.d.	n.d.	n.d.	n.d.		n.d.	n.d.		hsp20/alpha crystallin family protein, putative, expressed
LOC_Os01g04600	5 DAP-specific MEG		n.d.	n.d.	n.d.	n.d.	n.d.		n.d.	n.d.		expressed protein
LOC_Os01g05510	5 and 7 DAP overlapped PEG		n.d.	n.d.	n.d.	n.d.	n.d.		n.d.	n.d.		expressed protein
LOC_Os01g07610	3 DAP-specific MEG		n.d.	n.d.	n.d.	n.d.	n.d.		n.d.	n.d.		PPR repeat domain containing protein, putative, expressed
LOC_Os01g07740	5 and 7 DAP overlapped PEG		n.d.	n.d.	PEG	n.d.	PEG		PEG	PEG		DEAD-box ATP-dependent RNA helicase 14, putative, expressed
LOC_Os01g07920	Persistent PEG		n.d.	n.d.	n.d.	n.d.	n.d.		n.d.	n.d.		prolyl 4-hydroxylase, putative, expressed
LOC_Os01g07930	Persistent PEG		n.d.	n.d.	PEG	n.d.	PEG		n.d.	PEG		zinc finger C-x8-C-x5-C-x3-H type family protein, expressed
LOC_Os01g08330	7 DAP-specific MEG		n.d.	n.d.	n.d.	n.d.	n.d.		n.d.	n.d.		aspartic proteinase nepenthesin-1 precursor, putative, expressed
LOC_Os01g08570	Persistent PEG		n.d.	PEG	PEG	n.d.	PEG		PEG	PEG		2-oxoglutarate and iron-dependent oxygenase domain-containing protein2, putative, expressed
LOC_Os01g10080	Persistent MEG		MEG	MEG	MEG	n.d.	MEG		MEG	MEG		expressed protein
LOC_Os01g10480	5 DAP-specific MEG		n.d.	n.d.	n.d.	n.d.	n.d.		n.d.	n.d.		plastocyanin-like domain containing protein, putative, expressed
LOC_Os01g10504	n.d.		n.d.	n.d.	n.d.	n.d.	n.d.		n.d.	MEG		OsMADS3 - MADS-box family gene with MIKCc type-box, expressed
LOC_Os01g10520	Persistent MEG		MEG	n.d.	n.d.	n.d.	MEG		n.d.	MEG		expressed protein
LOC_Os01g11130	Persistent PEG		n.d.	n.d.	PEG	n.d.	PEG		PEG	PEG		RNA recognition motif containing protein, putative, expressed
LOC_Os01g12890	Persistent MEG		n.d.	n.d.	n.d.	n.d.	n.d.		n.d.	n.d.		expressed protein
LOC_Os01g13180	Persistent MEG		MEG	n.d.	MEG	n.d.	MEG		n.d.	MEG		expressed protein
LOC_Os01g13250	7 DAP-specific MEG		n.d.	n.d.	n.d.	n.d.	n.d.		n.d.	n.d.		sarcoma antigen NY-SAR-91, putative, expressed
LOC_Os01g13360	5 and 7 DAP overlapped PEG		n.d.	n.d.	n.d.	n.d.	n.d.		n.d.	n.d.		phosphatidylinositol 3- and 4-kinase family protein, putative, expressed
LOC_Os01g13404	Persistent PEG		n.d.	n.d.	n.d.	n.d.	n.d.		n.d.	n.d.		ATP binding protein, putative, expressed
LOC_Os01g13460	5 and 7 DAP overlapped PEG		n.d.	n.d.	PEG	n.d.	PEG		n.d.	PEG		helix-loop-helix DNA-binding domain containing protein, expressed
LOC_Os01g13470	7 DAP-specific MEG		n.d.	n.d.	n.d.	n.d.	n.d.		n.d.	n.d.		KH domain containing protein, putative, expressed
LOC_Os01g16240	n.d.		n.d.	n.d.	PEG	n.d.	n.d.		PEG	n.d.		OsCam1-3 - Calmodulin, expressed
LOC_Os01g16810	Persistent PEG		n.d.	PEG	PEG	n.d.	PEG		n.d.	PEG		MYB family transcription factor, putative, expressed
LOC_Os01g17060	3 DAP-specific PEG		n.d.	n.d.	n.d.	n.d.	n.d.		n.d.	n.d.		expressed protein
LOC_Os01g17250	5 and 7 DAP overlapped PEG		n.d.	n.d.	PEG	n.d.	PEG		PEG	n.d.		BRASSINOSTEROID INSENSITIVE 1-associated receptor kinase 1 precursor, putative, expressed
LOC_Os01g17990	Persistent PEG		n.d.	n.d.	PEG	n.d.	PEG		PEG	PEG		expressed protein
LOC_Os01g18810	Persistent MEG		n.d.	n.d.	n.d.	n.d.	n.d.		n.d.	n.d.		expressed protein
LOC_Os01g23620	7 DAP-specific PEG		n.d.	n.d.	n.d.	n.d.	n.d.		n.d.	n.d.		miro, putative, expressed
LOC_Os01g24460	3 DAP-specific MEG		n.d.	n.d.	n.d.	n.d.	n.d.		n.d.	n.d.		histone-like transcription factor and archaeal histone, putative, expressed
LOC_Os01g24710	7 DAP-specific MEG		n.d.	MEG	n.d.	n.d.	n.d.		n.d.	MEG		jacalin-like lectin domain containing protein, expressed
LOC_Os01g24880	5 and 7 DAP overlapped MEG		n.d.	n.d.	n.d.	n.d.	n.d.		n.d.	n.d.		zinc finger, C3HC4 type domain containing protein, expressed
LOC_Os01g25170	n.d.		n.d.	MEG	MEG	n.d.	n.d.		MEG	n.d.		expressed protein
LOC_Os01g27570	3 DAP-specific MEG		n.d.	n.d.	n.d.	n.d.	n.d.		n.d.	n.d.		expressed protein
LOC_Os01g27750	Persistent PEG		n.d.	n.d.	PEG	n.d.	PEG		PEG	PEG		bifunctional 3-dehydroquinate dehydratase/shikimate dehydrogenase,chloroplast precursor, putative, expressed
LOC_Os01g28230	3 DAP-specific PEG		n.d.	n.d.	n.d.	n.d.	n.d.		n.d.	n.d.		ZOS1-07 - C2H2 zinc finger protein, expressed
LOC_Os01g28300	Persistent MEG		n.d.	MEG	MEG	n.d.	MEG		n.d.	MEG		OsFBX7 - F-box domain containing protein, expressed
LOC_Os01g28810	3 DAP-specific MEG		n.d.	n.d.	n.d.	n.d.	n.d.		n.d.	n.d.		expressed protein
LOC_Os01g31629	3 DAP-specific PEG		n.d.	n.d.	n.d.	n.d.	n.d.		n.d.	n.d.		expressed protein
LOC_Os01g32890	3 DAP-specific PEG		n.d.	n.d.	n.d.	n.d.	n.d.		n.d.	n.d.		expressed protein
LOC_Os01g32980	Persistent PEG		n.d.	n.d.	n.d.	n.d.	n.d.		n.d.	n.d.		mitochondrial carrier protein, putative, expressed
LOC_Os01g33324	7 DAP-specific MEG		n.d.	n.d.	n.d.	n.d.	n.d.		n.d.	n.d.		retrotransposon protein, putative, Ty1-copia subclass, expressed
LOC_Os01g33370	Persistent MEG		n.d.	n.d.	n.d.	n.d.	n.d.		n.d.	n.d.		zinc-binding protein, putative, expressed
LOC_Os01g33650	Persistent PEG		n.d.	n.d.	PEG	n.d.	PEG		PEG	n.d.		expressed protein
LOC_Os01g34400	Persistent MEG		n.d.	n.d.	n.d.	n.d.	MEG		MEG	MEG		transposon protein, putative, Pong sub-class, expressed
LOC_Os01g34410	Persistent MEG		n.d.	MEG	n.d.	n.d.	MEG		MEG	MEG		transposon protein, putative, Pong sub-class, expressed
LOC_Os01g34880	7 DAP-specific PEG		n.d.	n.d.	n.d.	n.d.	n.d.		PEG	n.d.		callose synthase, putative, expressed
LOC_Os01g34890	3 and 7 DAP overlapped PEG		n.d.	n.d.	n.d.	n.d.	n.d.		n.d.	n.d.		GLUCAN SYNTHASE-LIKE protein, putative, expressed
LOC_Os01g36840	Persistent PEG		n.d.	n.d.	n.d.	n.d.	n.d.		n.d.	n.d.		ATP-binding region, ATPase-like domain containing protein, expressed
LOC_Os01g37580	3 DAP-specific MEG		n.d.	n.d.	n.d.	n.d.	n.d.		n.d.	n.d.		retrotransposon protein, putative, unclassified, expressed
LOC_Os01g38650	Persistent MEG		MEG	MEG	MEG	n.d.	MEG		MEG	MEG		expressed protein
LOC_Os01g40450	Persistent MEG		MEG	n.d.	MEG	n.d.	MEG		n.d.	MEG		2-aminoethanethiol dioxygenase, putative, expressed
LOC_Os01g40590	Persistent PEG		n.d.	n.d.	n.d.	n.d.	PEG		PEG	n.d.		tyrosine protein kinase domain containing protein, putative, expressed
LOC_Os01g41310	3 DAP-specific PEG		n.d.	n.d.	n.d.	n.d.	n.d.		n.d.	n.d.		OsFBX18 - F-box domain containing protein, expressed
LOC_Os01g41370	Persistent PEG		n.d.	n.d.	PEG	n.d.	PEG		PEG	PEG		FBD domain containing protein, putative, expressed
LOC_Os01g41630	5 and 7 DAP overlapped PEG		n.d.	n.d.	n.d.	n.d.	n.d.		PEG	n.d.		serine/threonine protein phosphatase 2A 55 kDa regulatory subunit B, putative, expressed
LOC_Os01g42090	5 DAP-specific MEG		n.d.	n.d.	n.d.	n.d.	n.d.		n.d.	n.d.		nodulin MtN3 family protein, putative, expressed
LOC_Os01g42210	3 and 5 DAP overlapped MEG		n.d.	n.d.	n.d.	n.d.	n.d.		n.d.	n.d.		LTPL47 - Protease inhibitor/seed storage/LTP family protein precursor, putative, expressed
LOC_Os01g42260	3 DAP-specific PEG		n.d.	n.d.	n.d.	n.d.	n.d.		n.d.	n.d.		transcriptional corepressor LEUNIG, putative, expressed
LOC_Os01g42270	Persistent MEG		MEG	n.d.	MEG	n.d.	n.d.		MEG	MEG		transcriptional corepressor LEUNIG, putative, expressed
LOC_Os01g42960	n.d.		n.d.	MEG	n.d.	n.d.	MEG		MEG	n.d.		TTL1, putative, expressed
LOC_Os01g42970	3 DAP-specific PEG		n.d.	n.d.	n.d.	n.d.	n.d.		n.d.	n.d.		zinc finger C-x8-C-x5-C-x3-H type family protein, expressed
LOC_Os01g46910	Persistent MEG		n.d.	MEG	MEG	n.d.	MEG		MEG	MEG		microneme protein Sm70, putative, expressed
LOC_Os01g47130	3 DAP-specific MEG		n.d.	MEG	n.d.	n.d.	n.d.		MEG	n.d.		expressed protein
LOC_Os01g48580	Persistent MEG		n.d.	n.d.	MEG	n.d.	MEG		MEG	MEG		ubiquitin-conjugating enzyme E2, putative, expressed
LOC_Os01g49360	5 DAP-specific MEG		n.d.	n.d.	n.d.	n.d.	n.d.		n.d.	n.d.		FAD-binding and arabino-lactone oxidase domains containing protein, putative, expressed
LOC_Os01g51754	5 and 7 DAP overlapped PEG		n.d.	PEG	PEG	n.d.	n.d.		PEG	n.d.		alpha-amylase precursor, putative, expressed
LOC_Os01g54100	Persistent PEG		n.d.	n.d.	n.d.	n.d.	n.d.		n.d.	n.d.		CK1 CaseinKinase 1a.2 - CK1 includes the casein kinase 1 kinases, expressed
LOC_Os01g54784	Persistent PEG		PEG	n.d.	PEG	n.d.	PEG		n.d.	PEG		expressed protein
LOC_Os01g55450	Persistent PEG		n.d.	n.d.	PEG	n.d.	PEG		n.d.	PEG		CAMK KIN1/SNF1/Nim1 like.11 - CAMK includes calcium/calmodulin depedent protein kinases, expressed
LOC_Os01g55720	3 DAP-specific PEG		n.d.	n.d.	n.d.	n.d.	n.d.		n.d.	n.d.		expressed protein
LOC_Os01g55950	7 DAP-specific MEG		n.d.	n.d.	n.d.	n.d.	n.d.		n.d.	n.d.		acetamidase, putative, expressed
LOC_Os01g56100	Persistent PEG		n.d.	n.d.	PEG	n.d.	PEG		n.d.	PEG		BSD domain containing protein, expressed
LOC_Os01g56110	Persistent PEG		PEG	n.d.	PEG	n.d.	PEG		n.d.	PEG		RNA recognition motif containing protein, putative, expressed
LOC_Os01g56580	Persistent PEG		n.d.	PEG	PEG	n.d.	PEG		PEG	PEG		CK1 CaseinKinase 1a.3 - CK1 includes the casein kinase 1 kinases, expressed
LOC_Os01g56710	5 DAP-specific MEG		n.d.	n.d.	n.d.	n.d.	n.d.		n.d.	n.d.		OsFBDUF6 - F-box and DUF domain containing protein, expressed
LOC_Os01g56800	n.d.		n.d.	MEG	MEG	n.d.	MEG		MEG	MEG		MATH domain containing protein, expressed
LOC_Os01g56820	Persistent PEG		n.d.	n.d.	n.d.	n.d.	n.d.		n.d.	n.d.		AGAP000951-PA, putative, expressed
LOC_Os01g57770	3 DAP-specific MEG		n.d.	n.d.	MEG	n.d.	n.d.		n.d.	MEG		OsPOP4 - Putative Prolyl Oligopeptidase homologue, expressed
LOC_Os01g60360	5 and 7 DAP overlapped MEG		n.d.	n.d.	n.d.	n.d.	n.d.		n.d.	n.d.		ubiquitin-conjugating enzyme, putative, expressed
LOC_Os01g60750	Persistent MEG		n.d.	n.d.	n.d.	n.d.	n.d.		n.d.	MEG		transposon protein, putative, unclassified, expressed
LOC_Os01g61020	3 DAP-specific PEG		n.d.	n.d.	n.d.	n.d.	n.d.		n.d.	n.d.		curculin-like lectin family protein, putative, expressed
LOC_Os01g61420	3 DAP-specific PEG		n.d.	n.d.	n.d.	n.d.	n.d.		n.d.	n.d.		zinc finger, C3HC4 type domain containing protein, expressed
LOC_Os01g61590	Persistent PEG		n.d.	PEG	PEG	n.d.	PEG		PEG	PEG		CAMK CAMK like.1 - CAMK includes calcium/calmodulin depedent protein kinases, expressed
LOC_Os01g62460	Persistent PEG		n.d.	n.d.	n.d.	n.d.	n.d.		n.d.	n.d.		ZOS1-16 - C2H2 zinc finger protein, expressed
LOC_Os01g62790	5 and 7 DAP overlapped PEG		n.d.	n.d.	n.d.	n.d.	n.d.		n.d.	n.d.		expressed protein
LOC_Os01g63250	Persistent PEG		PEG	PEG	PEG	n.d.	PEG		PEG	PEG		josephin, putative, expressed
LOC_Os01g63710	5 DAP-specific MEG		n.d.	n.d.	n.d.	n.d.	n.d.		n.d.	n.d.		CDC6 - Putative DNA replication initiation protein, expressed
LOC_Os01g64810	5 and 7 DAP overlapped MEG		MEG	MEG	MEG	n.d.	MEG		MEG	n.d.		zinc finger DHHC domain-containing protein, putative, expressed
LOC_Os01g65770	3 and 5 DAP overlapped MEG		n.d.	MEG	MEG	n.d.	MEG		n.d.	MEG		expressed protein
LOC_Os01g65850	Persistent PEG		PEG	n.d.	PEG	n.d.	n.d.		PEG	PEG		CHD3-type chromatin-remodeling factor PICKLE, putative, expressed
LOC_Os01g65986	Persistent PEG		n.d.	n.d.	n.d.	n.d.	n.d.		n.d.	n.d.		DUF803 domain containing, putative, expressed
LOC_Os01g66070	3 DAP-specific PEG		n.d.	n.d.	n.d.	n.d.	n.d.		n.d.	n.d.		PHD-finger domain containing protein, putative
LOC_Os01g66300	3 and 5 DAP overlapped PEG		n.d.	n.d.	n.d.	n.d.	n.d.		n.d.	n.d.		KH domain containing protein, putative, expressed
LOC_Os01g66510	3 DAP-specific MEG		n.d.	n.d.	n.d.	n.d.	n.d.		n.d.	n.d.		MLO domain containing protein, putative, expressed
LOC_Os01g67250	Persistent PEG		n.d.	PEG	PEG	n.d.	PEG		PEG	n.d.		Rad21 / Rec8 like protein, putative, expressed
LOC_Os01g67390	3 DAP-specific MEG		n.d.	n.d.	n.d.	n.d.	n.d.		n.d.	n.d.		POEI32 - Pollen Ole e I allergen and extensin family protein precursor, expressed
LOC_Os01g67870	5 and 7 DAP overlapped PEG		n.d.	n.d.	n.d.	n.d.	n.d.		n.d.	n.d.		expressed protein
LOC_Os01g68820	Persistent PEG		PEG	n.d.	PEG	n.d.	PEG		n.d.	PEG		expressed protein
LOC_Os01g69040	3 DAP-specific PEG		PEG	n.d.	PEG	n.d.	PEG		n.d.	PEG		zinc finger, C3HC4 type domain containing protein, expressed
LOC_Os01g69850	Persistent PEG		n.d.	n.d.	n.d.	n.d.	n.d.		n.d.	n.d.		OsMADS65 - MADS-box family gene with MIKC* type-box, expressed
LOC_Os01g69910	7 DAP-specific PEG		n.d.	n.d.	n.d.	n.d.	n.d.		n.d.	n.d.		calmodulin-binding transcription activator, putative, expressed
LOC_Os01g69920	3 DAP-specific PEG		n.d.	n.d.	n.d.	n.d.	n.d.		n.d.	n.d.		histidine kinase, putative, expressed
LOC_Os01g69930	Persistent PEG		n.d.	n.d.	n.d.	n.d.	n.d.		n.d.	n.d.		dnaJ domain containing protein, expressed
LOC_Os01g69940	Persistent PEG		n.d.	n.d.	PEG	n.d.	n.d.		n.d.	PEG		OsFBX32 - F-box domain containing protein, expressed
LOC_Os01g70060	n.d.		PEG	PEG	n.d.	n.d.	PEG		PEG	n.d.		protein of unknown function, DUF618 domain containing protein, expressed
LOC_Os01g73450	Persistent PEG		n.d.	n.d.	n.d.	n.d.	n.d.		n.d.	n.d.		amino acid kinase, putative, expressed
LOC_Os02g01490	3 DAP-specific PEG		n.d.	n.d.	n.d.	n.d.	n.d.		n.d.	n.d.		expressed protein
LOC_Os02g02400	3 DAP-specific MEG		n.d.	n.d.	n.d.	n.d.	n.d.		n.d.	n.d.		catalase isozyme A, putative, expressed
LOC_Os02g03600	3 and 7 DAP overlapped PEG		n.d.	n.d.	n.d.	n.d.	n.d.		n.d.	n.d.		dnaJ domain containing protein, expressed
LOC_Os02g03700	3 DAP-specific PEG		n.d.	n.d.	n.d.	n.d.	n.d.		n.d.	n.d.		expressed protein
LOC_Os02g04190	3 DAP-specific MEG		n.d.	n.d.	n.d.	n.d.	n.d.		n.d.	n.d.		THION23 - Plant thionin family protein precursor, expressed
LOC_Os02g04230	5 and 7 DAP overlapped MEG		n.d.	n.d.	n.d.	n.d.	n.d.		n.d.	n.d.		CGMC MAPKCMGC 2.7 - CGMC includes CDA, MAPK, GSK3, and CLKC kinases, expressed
LOC_Os02g04340	7 DAP-specific MEG		n.d.	n.d.	n.d.	n.d.	n.d.		n.d.	n.d.		NIN-like protein 2, putative, expressed
LOC_Os02g04450	Persistent PEG		n.d.	n.d.	n.d.	n.d.	n.d.		n.d.	n.d.		plant-specific domain TIGR01589 family protein, putative, expressed
LOC_Os02g05050	5 DAP-specific MEG		n.d.	n.d.	n.d.	n.d.	n.d.		n.d.	n.d.		OsSAUR4 - Auxin-responsive SAUR gene family member, expressed
LOC_Os02g05520	3 DAP-specific PEG		n.d.	n.d.	n.d.	n.d.	n.d.		n.d.	n.d.		expressed protein
LOC_Os02g05630	Persistent PEG		n.d.	PEG	PEG	n.d.	PEG		PEG	n.d.		protein phosphatase 2C, putative, expressed
LOC_Os02g06390	3 DAP-specific PEG		n.d.	n.d.	n.d.	n.d.	n.d.		n.d.	n.d.		expressed protein
LOC_Os02g06890	Persistent PEG		n.d.	n.d.	n.d.	n.d.	n.d.		n.d.	n.d.		OTU-like cysteine protease family protein, putative, expressed
LOC_Os02g07450	5 and 7 DAP overlapped PEG		n.d.	n.d.	n.d.	n.d.	n.d.		n.d.	n.d.		core histone H2A/H2B/H3/H4, putative, expressed
LOC_Os02g07790	Persistent PEG		n.d.	PEG	PEG	n.d.	PEG		PEG	PEG		serine/threonine-protein kinase HT1, putative, expressed
LOC_Os02g07800	7 DAP-specific PEG		n.d.	n.d.	n.d.	n.d.	n.d.		PEG	n.d.		transcription factor, putative, expressed
LOC_Os02g08300	Persistent PEG		n.d.	n.d.	PEG	n.d.	PEG		n.d.	PEG		RAD23 DNA repair protein, putative, expressed
LOC_Os02g08490	3 DAP-specific MEG		n.d.	n.d.	n.d.	n.d.	n.d.		n.d.	n.d.		chaperone protein clpB 1, putative, expressed
LOC_Os02g09580	Persistent MEG		n.d.	n.d.	n.d.	n.d.	n.d.		n.d.	n.d.		OsFBX39 - F-box domain containing protein, expressed
LOC_Os02g09630	5 DAP-specific PEG		n.d.	n.d.	n.d.	n.d.	n.d.		n.d.	n.d.		GA20292-PA, putative, expressed
LOC_Os02g09650	5 and 7 DAP overlapped PEG		n.d.	n.d.	PEG	n.d.	PEG		n.d.	PEG		AP2 domain containing protein, expressed
LOC_Os02g09770	Persistent PEG		n.d.	n.d.	n.d.	n.d.	n.d.		n.d.	n.d.		abhydrolase domain-containing protein FAM108C1, putative, expressed
LOC_Os02g10100	3 and 5 DAP overlapped PEG		n.d.	n.d.	n.d.	n.d.	n.d.		n.d.	n.d.		leucine-rich repeat receptor protein kinase EXS precursor, putative, expressed
LOC_Os02g10600	5 DAP-specific MEG		n.d.	n.d.	n.d.	n.d.	n.d.		n.d.	n.d.		OsFBA1 - F-box and FBA domain containing protein, expressed
LOC_Os02g10650	Persistent PEG		n.d.	n.d.	PEG	n.d.	PEG		PEG	PEG		CRAL/TRIO domain containing protein, expressed
LOC_Os02g12840	Persistent PEG		n.d.	n.d.	n.d.	n.d.	n.d.		n.d.	n.d.		DEAD-box ATP-dependent RNA helicase, putative, expressed
LOC_Os02g12870	Persistent PEG		n.d.	n.d.	n.d.	n.d.	n.d.		n.d.	n.d.		expressed protein
LOC_Os02g13870	3 DAP-specific MEG		n.d.	n.d.	n.d.	n.d.	n.d.		n.d.	n.d.		aquaporin protein, putative, expressed
LOC_Os02g14600	3 DAP-specific PEG		n.d.	n.d.	n.d.	n.d.	n.d.		n.d.	n.d.		glutelin, putative, expressed
LOC_Os02g14720	5 and 7 DAP overlapped MEG		n.d.	n.d.	MEG	n.d.	MEG		n.d.	MEG		expressed protein
LOC_Os02g15070	5 DAP-specific MEG		n.d.	n.d.	n.d.	n.d.	n.d.		n.d.	n.d.		glutelin, putative, expressed
LOC_Os02g15350	3 and 5 DAP overlapped MEG		n.d.	n.d.	n.d.	n.d.	n.d.		n.d.	n.d.		dof zinc finger domain containing protein, putative, expressed
LOC_Os02g16544	n.d.		n.d.	n.d.	MEG	n.d.	MEG		n.d.	MEG		expressed protein
LOC_Os02g17190	5 and 7 DAP overlapped PEG		n.d.	n.d.	n.d.	n.d.	n.d.		n.d.	n.d.		MYB family transcription factor, putative, expressed
LOC_Os02g17910	Persistent PEG		n.d.	PEG	PEG	n.d.	n.d.		n.d.	PEG		CK1 CaseinKinase 1.4 - CK1 includes the casein kinase 1 kinases, expressed
LOC_Os02g19220	3 DAP-specific PEG		n.d.	n.d.	n.d.	n.d.	n.d.		n.d.	n.d.		expressed protein
LOC_Os02g19340	3 DAP-specific MEG		n.d.	n.d.	n.d.	n.d.	n.d.		n.d.	n.d.		expressed protein
LOC_Os02g19880	3 DAP-specific MEG		n.d.	n.d.	n.d.	n.d.	n.d.		n.d.	n.d.		expressed protein
LOC_Os02g20394	3 and 7 DAP overlapped PEG		n.d.	n.d.	n.d.	n.d.	n.d.		n.d.	n.d.		dnaJ domain containing protein, expressed
LOC_Os02g20950	5 DAP-specific MEG		n.d.	n.d.	n.d.	n.d.	n.d.		n.d.	n.d.		expressed protein
LOC_Os02g21430	Persistent PEG		PEG	PEG	PEG	n.d.	PEG		PEG	PEG		AML1, putative, expressed
LOC_Os02g21460	Persistent PEG		n.d.	n.d.	n.d.	n.d.	n.d.		n.d.	n.d.		uncharacterized protein yqjG, putative, expressed
LOC_Os02g21550	3 DAP-specific MEG		n.d.	n.d.	n.d.	n.d.	n.d.		n.d.	n.d.		flavonol synthase/flavanone 3-hydroxylase, putative, expressed
LOC_Os02g21870	5 DAP-specific MEG		n.d.	n.d.	n.d.	n.d.	n.d.		n.d.	n.d.		expressed protein
LOC_Os02g23950	3 DAP-specific MEG		n.d.	n.d.	n.d.	n.d.	n.d.		n.d.	n.d.		transposon protein, putative, Pong sub-class, expressed
LOC_Os02g25820	3 DAP-specific MEG		n.d.	n.d.	n.d.	n.d.	n.d.		n.d.	n.d.		B3 DNA binding domain containing protein, expressed
LOC_Os02g28580	Persistent MEG		MEG	MEG	MEG	n.d.	MEG		MEG	MEG		expressed protein
LOC_Os02g28660	Persistent MEG		MEG	MEG	MEG	n.d.	MEG		MEG	MEG		expressed protein
LOC_Os02g29040	7 DAP-specific PEG		n.d.	n.d.	n.d.	n.d.	n.d.		n.d.	n.d.		ankyrin repeat domain containing protein, putative, expressed
LOC_Os02g29110	Persistent PEG		n.d.	n.d.	n.d.	n.d.	n.d.		n.d.	n.d.		ankyrin repeat family protein, putative, expressed
LOC_Os02g29130	3 and 7 DAP overlapped PEG		n.d.	n.d.	n.d.	n.d.	n.d.		n.d.	PEG		ankyrin, putative, expressed
LOC_Os02g29140	Persistent PEG		PEG	n.d.	n.d.	n.d.	n.d.		PEG	n.d.		ankyrin, putative, expressed
LOC_Os02g29150	3 and 5 DAP overlapped PEG		n.d.	n.d.	n.d.	n.d.	n.d.		n.d.	n.d.		OsFBO11 - F-box and other domain containing protein, expressed
LOC_Os02g29230	Persistent MEG		MEG	n.d.	n.d.	n.d.	MEG		MEG	MEG		expressed protein
LOC_Os02g30420	3 DAP-specific MEG		n.d.	n.d.	n.d.	n.d.	n.d.		n.d.	n.d.		expressed protein
LOC_Os02g31140	3 DAP-specific MEG		n.d.	n.d.	n.d.	n.d.	n.d.		n.d.	n.d.		major ampullate spidroin 2-2, putative, expressed
LOC_Os02g31970	5 and 7 DAP overlapped MEG		MEG	n.d.	MEG	n.d.	MEG		n.d.	MEG		retrotransposon protein, putative, unclassified, expressed
LOC_Os02g32210	3 and 7 DAP overlapped MEG		n.d.	n.d.	MEG	n.d.	n.d.		n.d.	MEG		expressed protein
LOC_Os02g32650	3 DAP-specific MEG		n.d.	n.d.	n.d.	n.d.	n.d.		n.d.	n.d.		expressed protein
LOC_Os02g33530	3 DAP-specific MEG		n.d.	n.d.	n.d.	n.d.	n.d.		n.d.	n.d.		retrotransposon protein, putative, unclassified, expressed
LOC_Os02g33700	Persistent MEG		n.d.	n.d.	n.d.	n.d.	n.d.		n.d.	n.d.		expressed protein
LOC_Os02g34330	3 and 5 DAP overlapped MEG		n.d.	n.d.	n.d.	n.d.	n.d.		n.d.	n.d.		retrotransposon protein, putative, unclassified, expressed
LOC_Os02g34360	Persistent PEG		n.d.	n.d.	n.d.	n.d.	n.d.		n.d.	n.d.		expressed protein
LOC_Os02g34370	Persistent PEG		n.d.	n.d.	PEG	n.d.	PEG		n.d.	PEG		expressed protein
LOC_Os02g34500	7 DAP-specific PEG		n.d.	n.d.	n.d.	n.d.	n.d.		n.d.	n.d.		expressed protein
LOC_Os02g34850	5 and 7 DAP overlapped PEG		n.d.	n.d.	n.d.	n.d.	n.d.		n.d.	n.d.		histone-lysine N-methyltransferase ASHH2, putative, expressed
LOC_Os02g34990	Persistent MEG		n.d.	n.d.	n.d.	n.d.	n.d.		n.d.	n.d.		ACT domain containing protein, putative, expressed
LOC_Os02g35010	3 and 5 DAP overlapped PEG		n.d.	n.d.	n.d.	n.d.	n.d.		n.d.	n.d.		STE MEKK ste11 MAP3K.9 - STE kinases include homologs to sterile 7, sterile 11 and sterile 20 from yeast, expressed
LOC_Os02g35130	7 DAP-specific PEG		n.d.	n.d.	n.d.	n.d.	n.d.		n.d.	n.d.		AIG1, putative, expressed
LOC_Os02g35144	3 and 5 DAP overlapped PEG		n.d.	n.d.	n.d.	n.d.	n.d.		n.d.	n.d.		zinc finger, C3HC4 type domain containing protein, expressed
LOC_Os02g36360	Persistent PEG		n.d.	n.d.	PEG	n.d.	PEG		n.d.	PEG		ZOS2-11 - C2H2 zinc finger protein, expressed
LOC_Os02g36550	7 DAP-specific MEG		n.d.	n.d.	n.d.	n.d.	n.d.		n.d.	n.d.		phosphopantothenate--cysteine ligase, putative, expressed
LOC_Os02g36680	Persistent PEG		n.d.	n.d.	PEG	n.d.	PEG		n.d.	PEG		expressed protein
LOC_Os02g36710	7 DAP-specific PEG		n.d.	n.d.	n.d.	n.d.	n.d.		n.d.	n.d.		SET, putative, expressed
LOC_Os02g37440	7 DAP-specific PEG		n.d.	n.d.	n.d.	n.d.	n.d.		n.d.	n.d.		expressed protein
LOC_Os02g37856	3 DAP-specific PEG		n.d.	n.d.	n.d.	n.d.	n.d.		n.d.	n.d.		expressed protein
LOC_Os02g38080	7 DAP-specific MEG		n.d.	n.d.	n.d.	n.d.	n.d.		n.d.	n.d.		protein kinase domain containing protein, expressed
LOC_Os02g39920	Persistent PEG		PEG	n.d.	PEG	n.d.	PEG		n.d.	PEG		AT hook motif family protein, expressed
LOC_Os02g40770	3 DAP-specific PEG		n.d.	n.d.	n.d.	n.d.	n.d.		n.d.	n.d.		SET domain containing protein, expressed
LOC_Os02g41610	Persistent PEG		n.d.	PEG	PEG	n.d.	PEG		PEG	PEG		expressed protein
LOC_Os02g41630	5 and 7 DAP overlapped PEG		n.d.	n.d.	n.d.	n.d.	n.d.		n.d.	n.d.		phenylalanine ammonia-lyase, putative, expressed
LOC_Os02g42220	5 DAP-specific MEG		n.d.	n.d.	n.d.	n.d.	n.d.		n.d.	n.d.		transposon protein, putative, unclassified, expressed
LOC_Os02g43460	5 and 7 DAP overlapped MEG		n.d.	n.d.	n.d.	n.d.	n.d.		n.d.	n.d.		required to maintain repression 1, putative, expressed
LOC_Os02g44102	3 DAP-specific PEG		n.d.	n.d.	n.d.	n.d.	n.d.		n.d.	n.d.		remorin C-terminal domain containing protein, putative, expressed
LOC_Os02g44290	3 DAP-specific MEG		n.d.	n.d.	n.d.	n.d.	n.d.		n.d.	n.d.		phosphatase, putative, expressed
LOC_Os02g45344	Persistent PEG		n.d.	n.d.	n.d.	n.d.	n.d.		n.d.	n.d.		O-acyltransferase, putative, expressed
LOC_Os02g47340	3 DAP-specific MEG		n.d.	n.d.	n.d.	n.d.	n.d.		n.d.	n.d.		retrotransposon protein, putative, unclassified, expressed
LOC_Os02g47950	5 and 7 DAP overlapped PEG		n.d.	PEG	PEG	n.d.	n.d.		PEG	n.d.		expressed protein
LOC_Os02g48320	3 DAP-specific PEG		n.d.	n.d.	n.d.	n.d.	n.d.		n.d.	n.d.		DNA binding protein, putative, expressed
LOC_Os02g48820	n.d.		n.d.	n.d.	n.d.	n.d.	MEG		n.d.	MEG		plastocyanin-like domain containing protein, putative, expressed
LOC_Os02g49150	3 and 7 DAP overlapped PEG		n.d.	n.d.	n.d.	n.d.	n.d.		PEG	n.d.		RNA polymerase Rpb4, putative, expressed
LOC_Os02g50480	3 DAP-specific PEG		n.d.	n.d.	n.d.	n.d.	n.d.		n.d.	n.d.		histidine kinase, putative, expressed
LOC_Os02g50850	5 DAP-specific PEG		n.d.	n.d.	n.d.	n.d.	n.d.		n.d.	n.d.		BAH domain containing protein, putative, expressed
LOC_Os02g50860	Persistent PEG		n.d.	PEG	PEG	n.d.	n.d.		PEG	n.d.		ras-related protein, putative, expressed
LOC_Os02g51540	Persistent PEG		PEG	PEG	PEG	n.d.	PEG		PEG	PEG		eukaryotic aspartyl protease domain containing protein, expressed
LOC_Os02g51550	Persistent PEG		n.d.	PEG	PEG	n.d.	PEG		PEG	n.d.		DUF581 domain containing protein, expressed
LOC_Os02g51780	5 DAP-specific PEG		n.d.	n.d.	n.d.	n.d.	n.d.		n.d.	n.d.		ribonuclease protein, putative, expressed
LOC_Os02g51850	Persistent PEG		n.d.	n.d.	n.d.	n.d.	n.d.		n.d.	n.d.		OsAPRL3 adenosine 5'-phosphosulfate reductase-like OsAPRL3, expressed
LOC_Os02g51860	Persistent PEG		n.d.	n.d.	n.d.	n.d.	n.d.		n.d.	n.d.		dehydration response related protein, putative, expressed
LOC_Os02g52630	3 DAP-specific MEG		n.d.	n.d.	n.d.	n.d.	n.d.		n.d.	n.d.		xyloglucan fucosyltransferase, putative, expressed
LOC_Os02g52920	Persistent PEG		n.d.	n.d.	n.d.	n.d.	n.d.		PEG	n.d.		emp24/gp25L/p24 family protein, putative, expressed
LOC_Os02g52960	Persistent PEG		PEG	n.d.	PEG	n.d.	n.d.		PEG	n.d.		PHD-finger domain containing protein, putative, expressed
LOC_Os02g53740	3 and 5 DAP overlapped PEG		n.d.	n.d.	n.d.	n.d.	n.d.		n.d.	n.d.		XI-I, putative, expressed
LOC_Os02g55560	n.d.		MEG	MEG	MEG	n.d.	MEG		n.d.	MEG		protein phosphatase 2C, putative, expressed
LOC_Os02g56530	Persistent PEG		n.d.	PEG	PEG	n.d.	PEG		PEG	PEG		ankyrin repeat domain containing protein, expressed
LOC_Os02g56880	3 DAP-specific PEG		n.d.	n.d.	n.d.	n.d.	n.d.		n.d.	n.d.		transcriptional corepressor LEUNIG, putative, expressed
LOC_Os02g57080	Persistent PEG		PEG	PEG	PEG	n.d.	PEG		n.d.	PEG		serine/threonine-protein kinase, putative, expressed
LOC_Os02g57190	Persistent PEG		PEG	n.d.	PEG	n.d.	PEG		PEG	n.d.		Myosin head domain containing protein, expressed
LOC_Os02g57200	Persistent PEG		n.d.	PEG	n.d.	n.d.	n.d.		PEG	PEG		expressed protein
LOC_Os02g57820	Persistent PEG		n.d.	n.d.	n.d.	n.d.	n.d.		n.d.	n.d.		AT hook motif domain containing protein, expressed
LOC_Os03g01320	n.d.		MEG	n.d.	n.d.	n.d.	MEG		n.d.	MEG		LTPL116 - Protease inhibitor/seed storage/LTP family protein precursor, expressed
LOC_Os03g02180	7 DAP-specific PEG		n.d.	n.d.	n.d.	n.d.	n.d.		n.d.	n.d.		cytochrome P450, putative, expressed
LOC_Os03g03070	3 and 7 DAP overlapped PEG		n.d.	n.d.	PEG	n.d.	PEG		n.d.	PEG		transcription factor, putative, expressed
LOC_Os03g03100	3 DAP-specific PEG		n.d.	n.d.	n.d.	n.d.	n.d.		n.d.	n.d.		OsMADS50 - MADS-box family gene with MIKCc type-box, expressed
LOC_Os03g03920	3 DAP-specific PEG		n.d.	n.d.	n.d.	n.d.	n.d.		n.d.	n.d.		Ubiquitin family domain containing protein, expressed
LOC_Os03g04350	3 DAP-specific MEG		n.d.	n.d.	n.d.	n.d.	n.d.		n.d.	MEG		expressed protein
LOC_Os03g04545	5 DAP-specific PEG		n.d.	n.d.	n.d.	n.d.	n.d.		n.d.	n.d.		expressed protein
LOC_Os03g05180	5 and 7 DAP overlapped PEG		n.d.	n.d.	n.d.	n.d.	n.d.		n.d.	PEG		expressed protein
LOC_Os03g05480	5 and 7 DAP overlapped PEG		n.d.	n.d.	PEG	n.d.	PEG		PEG	n.d.		ZOS3-01 - C2H2 zinc finger protein, expressed
LOC_Os03g05800	3 DAP-specific MEG		n.d.	n.d.	n.d.	n.d.	n.d.		n.d.	n.d.		expressed protein
LOC_Os03g07080	3 DAP-specific PEG		n.d.	n.d.	n.d.	n.d.	n.d.		n.d.	n.d.		endonuclease/exonuclease/phosphatase family domain containing protein, expressed
LOC_Os03g07130	5 and 7 DAP overlapped PEG		n.d.	n.d.	PEG	n.d.	PEG		PEG	n.d.		RING finger protein 13, putative, expressed
LOC_Os03g07500	3 DAP-specific MEG		n.d.	n.d.	n.d.	n.d.	n.d.		n.d.	n.d.		hypothetical protein
LOC_Os03g09150	5 DAP-specific PEG		n.d.	n.d.	n.d.	n.d.	n.d.		n.d.	n.d.		pumilio-family RNA binding repeat domain containing protein, expressed
LOC_Os03g11550	7 DAP-specific PEG		n.d.	n.d.	n.d.	n.d.	n.d.		n.d.	n.d.		protein of unknown function DUF1675 domain containing protein, expressed
LOC_Os03g12570	3 DAP-specific PEG		n.d.	n.d.	n.d.	n.d.	n.d.		n.d.	n.d.		expressed protein
LOC_Os03g14280	5 and 7 DAP overlapped PEG		n.d.	n.d.	n.d.	n.d.	n.d.		n.d.	n.d.		ATP-dependent Clp protease ATP-binding subunit, putative, expressed
LOC_Os03g14290	3 and 7 DAP overlapped PEG		n.d.	n.d.	n.d.	n.d.	PEG		n.d.	PEG		expressed protein
LOC_Os03g14300	n.d.		n.d.	n.d.	n.d.	n.d.	PEG		n.d.	PEG		THION29 - Plant thionin family protein precursor, expressed
LOC_Os03g15010	Persistent PEG		n.d.	n.d.	n.d.	n.d.	PEG		PEG	n.d.		transposon protein, putative, unclassified, expressed
LOC_Os03g15990	Persistent MEG		n.d.	n.d.	MEG	n.d.	n.d.		MEG	n.d.		EDM2, putative, expressed
LOC_Os03g16570	7 DAP-specific PEG		n.d.	n.d.	n.d.	n.d.	n.d.		n.d.	n.d.		zinc finger, C3HC4 type domain containing protein, expressed
LOC_Os03g16730	3 DAP-specific PEG		n.d.	n.d.	n.d.	n.d.	n.d.		n.d.	n.d.		expressed protein
LOC_Os03g16760	5 and 7 DAP overlapped MEG		n.d.	MEG	MEG	n.d.	MEG		MEG	n.d.		protein phosphatase 2C, putative, expressed
LOC_Os03g16940	5 DAP-specific MEG		n.d.	n.d.	n.d.	n.d.	n.d.		n.d.	n.d.		glyoxalase family protein, putative, expressed
LOC_Os03g17980	3 DAP-specific PEG		n.d.	n.d.	n.d.	n.d.	n.d.		n.d.	n.d.		CAMK KIN1/SNF1/Nim1 like AMPKh.2 - CAMK includes calcium/calmodulin depedent protein kinases, expressed
LOC_Os03g18080	Persistent PEG		n.d.	PEG	PEG	n.d.	n.d.		PEG	PEG		SacI homology domain containing protein, expressed
LOC_Os03g19920	Persistent PEG		n.d.	n.d.	n.d.	n.d.	n.d.		n.d.	n.d.		expressed protein
LOC_Os03g20430	Persistent MEG		MEG	n.d.	n.d.	n.d.	MEG		MEG	MEG		histone-lysine N-methyltransferase, H3 lysine-9 specific SUVH8, putative, expressed
LOC_Os03g21870	Persistent MEG		n.d.	n.d.	n.d.	n.d.	MEG		MEG	n.d.		DUF623 domain containing protein, expressed
LOC_Os03g22470	7 DAP-specific MEG		n.d.	n.d.	MEG	n.d.	MEG		n.d.	MEG		desiccation-related protein PCC13-62 precursor, putative, expressed
LOC_Os03g22810	5 DAP-specific MEG		n.d.	n.d.	n.d.	n.d.	n.d.		n.d.	n.d.		copper/zinc superoxide dismutase, putative, expressed
LOC_Os03g24900	Persistent PEG		n.d.	PEG	PEG	n.d.	n.d.		PEG	PEG		DHHC zinc finger domain containing protein, expressed
LOC_Os03g24910	3 DAP-specific PEG		n.d.	n.d.	n.d.	n.d.	n.d.		n.d.	n.d.		nodulation protein-related, putative, expressed
LOC_Os03g25070	Persistent PEG		n.d.	PEG	PEG	n.d.	PEG		PEG	PEG		CAMK CAMK like.18 - CAMK includes calcium/calmodulin depedent protein kinases, expressed
LOC_Os03g25600	3 DAP-specific PEG		n.d.	n.d.	n.d.	n.d.	n.d.		n.d.	n.d.		protein phosphatase 2C, putative, expressed
LOC_Os03g26020	n.d.		n.d.	n.d.	MEG	n.d.	MEG		n.d.	MEG		retrotransposon protein, putative, unclassified, expressed
LOC_Os03g26280	5 DAP-specific MEG		n.d.	n.d.	n.d.	n.d.	n.d.		n.d.	MEG		expressed protein
LOC_Os03g27450	Persistent PEG		PEG	n.d.	PEG	n.d.	PEG		n.d.	PEG		ADP-ribosylation factor, putative, expressed
LOC_Os03g27460	Persistent PEG		PEG	n.d.	PEG	n.d.	PEG		n.d.	PEG		heat shock protein DnaJ, putative, expressed
LOC_Os03g27820	7 DAP-specific PEG		n.d.	n.d.	n.d.	n.d.	n.d.		n.d.	n.d.		expressed protein
LOC_Os03g29470	Persistent PEG		n.d.	n.d.	n.d.	n.d.	n.d.		n.d.	n.d.		transcription initiation factor IID, putative, expressed
LOC_Os03g29740	5 DAP-specific MEG		n.d.	n.d.	n.d.	n.d.	n.d.		n.d.	n.d.		LSM domain containing protein, expressed
LOC_Os03g30750	3 DAP-specific MEG		n.d.	n.d.	n.d.	n.d.	n.d.		n.d.	n.d.		hypothetical protein
LOC_Os03g31070	5 and 7 DAP overlapped PEG		n.d.	n.d.	n.d.	n.d.	n.d.		n.d.	n.d.		protein kinase, putative, expressed
LOC_Os03g31210	5 DAP-specific MEG		n.d.	n.d.	n.d.	n.d.	n.d.		n.d.	n.d.		UDP-glucose 6-dehydrogenase, putative, expressed
LOC_Os03g31944	Persistent MEG		n.d.	n.d.	n.d.	n.d.	MEG		n.d.	MEG		expressed protein
LOC_Os03g32460	3 DAP-specific MEG		n.d.	n.d.	n.d.	n.d.	n.d.		n.d.	n.d.		retrotransposon, putative, centromere-specific, expressed
LOC_Os03g33590	7 DAP-specific PEG		n.d.	n.d.	n.d.	n.d.	n.d.		n.d.	n.d.		interferon-related developmental regulator, putative, expressed
LOC_Os03g36790	Persistent PEG		n.d.	n.d.	PEG	n.d.	PEG		PEG	PEG		tobamovirus multiplication protein, putative, expressed
LOC_Os03g37270	7 DAP-specific PEG		n.d.	n.d.	n.d.	n.d.	n.d.		n.d.	n.d.		RNA recognition motif containing protein, putative, expressed
LOC_Os03g38610	3 DAP-specific MEG		n.d.	n.d.	n.d.	n.d.	n.d.		n.d.	n.d.		OsMADS87 - MADS-box family gene with M-gamma type-box, expressed
LOC_Os03g38970	Persistent PEG		PEG	n.d.	PEG	n.d.	PEG		n.d.	PEG		metal ion binding protein, putative, expressed
LOC_Os03g40930	7 DAP-specific PEG		n.d.	PEG	PEG	n.d.	PEG		PEG	n.d.		expressed protein
LOC_Os03g42050	Persistent PEG		n.d.	n.d.	n.d.	n.d.	n.d.		n.d.	n.d.		exportin-7-A, putative, expressed
LOC_Os03g42670	3 DAP-specific MEG		n.d.	n.d.	n.d.	n.d.	n.d.		n.d.	n.d.		transposon protein, putative, unclassified, expressed
LOC_Os03g43580	7 DAP-specific PEG		n.d.	n.d.	n.d.	n.d.	n.d.		n.d.	n.d.		IQ calmodulin-binding motif family protein, putative, expressed
LOC_Os03g43590	5 and 7 DAP overlapped PEG		n.d.	n.d.	PEG	n.d.	PEG		PEG	n.d.		LSTK-1-like kinase, putative, expressed
LOC_Os03g43890	Persistent PEG		n.d.	n.d.	n.d.	n.d.	n.d.		PEG	n.d.		WD domain, G-beta repeat domain containing protein, expressed
LOC_Os03g47686	Persistent PEG		n.d.	n.d.	n.d.	n.d.	n.d.		n.d.	n.d.		ankyrin, putative, expressed
LOC_Os03g47693	3 DAP-specific PEG		n.d.	n.d.	n.d.	n.d.	n.d.		n.d.	n.d.		ankyrin repeat family protein, putative, expressed
LOC_Os03g48810	3 DAP-specific MEG		n.d.	n.d.	n.d.	n.d.	n.d.		n.d.	n.d.		nucleobase-ascorbate transporter, putative, expressed
LOC_Os03g49770	3 DAP-specific PEG		n.d.	n.d.	n.d.	n.d.	n.d.		n.d.	n.d.		oxysterol-binding protein, putative, expressed
LOC_Os03g50330	Persistent PEG		n.d.	n.d.	n.d.	n.d.	n.d.		n.d.	n.d.		CAMK KIN1/SNF1/Nim1 like.18 - CAMK includes calcium/calmodulin depedent protein kinases, expressed
LOC_Os03g50440	5 DAP-specific PEG		n.d.	n.d.	n.d.	n.d.	n.d.		n.d.	n.d.		ubiquitin-conjugating enzyme, putative, expressed
LOC_Os03g51220	3 and 5 DAP overlapped MEG		n.d.	n.d.	n.d.	n.d.	n.d.		n.d.	n.d.		SWI/SNF-related matrix-associated actin-dependent regulator of chromatin subfamily C member, putative, expressed
LOC_Os03g51610	5 and 7 DAP overlapped PEG		n.d.	n.d.	n.d.	n.d.	n.d.		n.d.	n.d.		Inositol 1, 3, 4-trisphosphate 5/6-kinase, putative, expressed
LOC_Os03g52594	Persistent PEG		n.d.	n.d.	n.d.	n.d.	n.d.		n.d.	n.d.		CCR4-NOT transcription factor, putative, expressed
LOC_Os03g52620	3 DAP-specific MEG		n.d.	n.d.	n.d.	n.d.	n.d.		n.d.	n.d.		expressed protein
LOC_Os03g53590	3 DAP-specific MEG		n.d.	n.d.	n.d.	n.d.	n.d.		n.d.	PEG		expressed protein
LOC_Os03g53630	Persistent PEG		n.d.	PEG	n.d.	n.d.	PEG		PEG	PEG		PHD finger family protein, putative, expressed
LOC_Os03g53770	5 DAP-specific PEG		n.d.	n.d.	n.d.	n.d.	n.d.		n.d.	n.d.		RNA recognition motif containing protein, putative, expressed
LOC_Os03g54900	Persistent PEG		n.d.	PEG	PEG	n.d.	PEG		PEG	n.d.		phytosulfokine receptor precursor, putative, expressed
LOC_Os03g54910	Persistent PEG		n.d.	n.d.	n.d.	n.d.	n.d.		PEG	n.d.		X8 domain containing protein, expressed
LOC_Os03g55630	7 DAP-specific PEG		n.d.	n.d.	n.d.	n.d.	n.d.		n.d.	n.d.		expressed protein
LOC_Os03g55820	3 DAP-specific MEG		n.d.	n.d.	n.d.	n.d.	n.d.		n.d.	n.d.		thioredoxin, putative, expressed
LOC_Os03g56250	Persistent PEG		PEG	n.d.	PEG	n.d.	n.d.		PEG	n.d.		LRR receptor-like protein kinase, putative, expressed
LOC_Os03g56310	Persistent PEG		n.d.	PEG	PEG	n.d.	PEG		PEG	PEG		5-nucleotidase domain-containing protein, putative, expressed
LOC_Os03g57130	7 DAP-specific PEG		n.d.	n.d.	n.d.	n.d.	n.d.		n.d.	n.d.		expressed protein
LOC_Os03g57690	7 DAP-specific MEG		n.d.	n.d.	n.d.	n.d.	n.d.		n.d.	n.d.		aldehyde oxidase, putative, expressed
LOC_Os03g58060	5 and 7 DAP overlapped PEG		n.d.	n.d.	n.d.	n.d.	n.d.		n.d.	n.d.		XRN 5'-3' exonuclease N-terminus domain containing protein, expressed
LOC_Os03g58130	Persistent PEG		n.d.	n.d.	PEG	n.d.	n.d.		PEG	n.d.		thioredoxin, putative, expressed
LOC_Os03g58530	5 DAP-specific MEG		n.d.	MEG	MEG	n.d.	MEG		MEG	n.d.		ES43 protein, putative, expressed
LOC_Os03g59680	7 DAP-specific PEG		n.d.	n.d.	PEG	n.d.	PEG		n.d.	PEG		PAPA-1-like conserved region family protein, expressed
LOC_Os03g59740	Persistent PEG		n.d.	n.d.	n.d.	n.d.	n.d.		n.d.	n.d.		ADP-ribosylation factor, putative, expressed
LOC_Os03g60120	3 and 5 DAP overlapped PEG		n.d.	n.d.	n.d.	n.d.	n.d.		n.d.	n.d.		AP2 domain containing protein, expressed
LOC_Os03g60130	Persistent PEG		n.d.	n.d.	n.d.	n.d.	PEG		PEG	n.d.		transcription elongation factor protein, putative, expressed
LOC_Os03g60140	5 DAP-specific PEG		n.d.	n.d.	n.d.	n.d.	PEG		n.d.	PEG		U-box domain-containing protein, putative, expressed
LOC_Os03g60150	Persistent PEG		n.d.	PEG	PEG	n.d.	PEG		PEG	PEG		protein kinase domain containing protein, expressed
LOC_Os03g60710	Persistent PEG		n.d.	PEG	PEG	n.d.	PEG		PEG	PEG		protein kinase domain containing protein, expressed
LOC_Os03g60810	3 DAP-specific MEG		n.d.	n.d.	n.d.	n.d.	n.d.		n.d.	n.d.		lectin-like receptor kinase, putative, expressed
LOC_Os03g61070	3 DAP-specific MEG		n.d.	n.d.	n.d.	n.d.	n.d.		n.d.	n.d.		expressed protein
LOC_Os03g61120	Persistent PEG		n.d.	PEG	PEG	n.d.	PEG		PEG	n.d.		anthranilate synthase component I-1, chloroplast precursor, putative, expressed
LOC_Os03g62660	5 and 7 DAP overlapped PEG		n.d.	n.d.	n.d.	n.d.	n.d.		n.d.	n.d.		transposon protein, putative, unclassified, expressed
LOC_Os03g63040	Persistent PEG		n.d.	PEG	n.d.	n.d.	PEG		PEG	n.d.		expressed protein
LOC_Os03g63770	Persistent PEG		n.d.	n.d.	n.d.	n.d.	PEG		PEG	PEG		RCD1, putative, expressed
LOC_Os03g63940	n.d.		n.d.	PEG	n.d.	n.d.	n.d.		PEG	n.d.		CBS domain containing membrane protein, putative, expressed
LOC_Os04g01650	5 DAP-specific MEG		n.d.	n.d.	n.d.	n.d.	n.d.		n.d.	n.d.		erythronate-4-phosphate dehydrogenase domain containing protein, expressed
LOC_Os04g05010	3 DAP-specific PEG		n.d.	n.d.	n.d.	n.d.	n.d.		n.d.	n.d.		CBS domain containing membrane protein, putative, expressed
LOC_Os04g05030	Persistent PEG		n.d.	n.d.	n.d.	n.d.	n.d.		n.d.	n.d.		serine-rich 25 kDa antigen protein, putative, expressed
LOC_Os04g06770	Persistent PEG		n.d.	n.d.	n.d.	n.d.	n.d.		n.d.	n.d.		argonaute, putative, expressed
LOC_Os04g08034	Persistent MEG		n.d.	MEG	MEG	n.d.	MEG		MEG	n.d.		ZOS4-02 - C2H2 zinc finger protein, expressed
LOC_Os04g08470	Persistent PEG		n.d.	n.d.	PEG	n.d.	PEG		PEG	PEG		OsFBX116 - F-box domain containing protein, expressed
LOC_Os04g08570	Persistent MEG		MEG	MEG	MEG	n.d.	MEG		MEG	MEG		uncharacterized PE-PGRS family protein PE PGRS20, putative, expressed
LOC_Os04g10260	Persistent MEG		n.d.	MEG	MEG	n.d.	MEG		MEG	MEG		basic region leucine zipper domain containing protein, expressed
LOC_Os04g10680	3 DAP-specific PEG		n.d.	n.d.	n.d.	n.d.	n.d.		n.d.	n.d.		zinc finger, C3HC4 type domain containing protein, expressed
LOC_Os04g11730	3 and 5 DAP overlapped MEG		n.d.	n.d.	n.d.	n.d.	n.d.		n.d.	n.d.		methyl-CpG binding domain containing protein, expressed
LOC_Os04g11830	5 and 7 DAP overlapped PEG		n.d.	n.d.	n.d.	n.d.	n.d.		n.d.	n.d.		TCP family transcription factor, putative, expressed
LOC_Os04g12540	3 DAP-specific MEG		n.d.	n.d.	n.d.	n.d.	n.d.		n.d.	n.d.		receptor-like protein kinase, putative, expressed
LOC_Os04g13210	5 and 7 DAP overlapped MEG		n.d.	n.d.	n.d.	n.d.	n.d.		n.d.	n.d.		multidrug resistance-associated protein, putative, expressed
LOC_Os04g17700	Persistent PEG		n.d.	n.d.	n.d.	n.d.	n.d.		n.d.	n.d.		kinesin heavy chain isolog, putative, expressed
LOC_Os04g20774	Persistent PEG		n.d.	n.d.	n.d.	n.d.	n.d.		n.d.	n.d.		pumilio-family RNA binding repeat containing protein, expressed
LOC_Os04g22130	3 and 7 DAP overlapped MEG		n.d.	n.d.	n.d.	n.d.	n.d.		n.d.	MEG		conserved hypothetical protein
LOC_Os04g22240	Persistent PEG		PEG	n.d.	PEG	n.d.	PEG		n.d.	PEG		zinc finger, C3HC4 type domain containing protein, expressed
LOC_Os04g24410	7 DAP-specific PEG		n.d.	n.d.	n.d.	n.d.	n.d.		n.d.	n.d.		kinesin heavy chain isolog, putative, expressed
LOC_Os04g24710	7 DAP-specific MEG		n.d.	n.d.	n.d.	n.d.	n.d.		n.d.	n.d.		ubiquitin carboxyl-terminal hydrolase, family 1, putative, expressed
LOC_Os04g25190	3 and 7 DAP overlapped MEG		n.d.	n.d.	n.d.	n.d.	n.d.		n.d.	n.d.		pollen allergen, putative, expressed
LOC_Os04g25870	3 DAP-specific MEG		n.d.	n.d.	n.d.	n.d.	n.d.		n.d.	n.d.		OsMADS84 - MADS-box family gene with M-gamma type-box, expressed
LOC_Os04g28120	Persistent MEG		MEG	MEG	n.d.	n.d.	n.d.		MEG	n.d.		response regulator receiver domain containing protein, expressed
LOC_Os04g31160	3 DAP-specific PEG		n.d.	n.d.	n.d.	n.d.	n.d.		n.d.	n.d.		hypothetical protein
LOC_Os04g31170	Persistent PEG		n.d.	PEG	PEG	n.d.	n.d.		PEG	PEG		expressed protein
LOC_Os04g31804	n.d.		n.d.	PEG	PEG	n.d.	n.d.		PEG	n.d.		OsMADS64 - MADS-box family gene with M-alpha type-box, expressed
LOC_Os04g32880	Persistent PEG		PEG	PEG	PEG	n.d.	n.d.		PEG	PEG		CBS domain containing membrane protein, putative, expressed
LOC_Os04g32890	3 DAP-specific MEG		n.d.	n.d.	n.d.	n.d.	n.d.		n.d.	n.d.		retrotransposon protein, putative, unclassified, expressed
LOC_Os04g32970	Persistent PEG		n.d.	n.d.	PEG	n.d.	PEG		n.d.	PEG		OTU-like cysteine protease family protein, putative, expressed
LOC_Os04g33560	3 DAP-specific MEG		n.d.	n.d.	n.d.	n.d.	n.d.		n.d.	n.d.		expressed protein
LOC_Os04g33760	3 DAP-specific MEG		n.d.	n.d.	n.d.	n.d.	n.d.		n.d.	n.d.		DUF584 domain containing protein, putative, expressed
LOC_Os04g34440	3 DAP-specific PEG		n.d.	n.d.	n.d.	n.d.	n.d.		n.d.	n.d.		ubiquitin interaction motif-containing protein, putative, expressed
LOC_Os04g35000	3 and 5 DAP overlapped MEG		n.d.	MEG	MEG	n.d.	MEG		MEG	MEG		expressed protein
LOC_Os04g36620	Persistent PEG		n.d.	n.d.	n.d.	n.d.	n.d.		n.d.	n.d.		hydrolase, alpha/beta fold family domain containing protein, expressed
LOC_Os04g38525	Persistent MEG		n.d.	n.d.	n.d.	n.d.	MEG		n.d.	MEG		expressed protein
LOC_Os04g38550	7 DAP-specific PEG		n.d.	n.d.	n.d.	n.d.	n.d.		n.d.	n.d.		expressed protein
LOC_Os04g38950	5 DAP-specific PEG		n.d.	n.d.	n.d.	n.d.	n.d.		n.d.	n.d.		class I glutamine amidotransferase, putative, expressed
LOC_Os04g39150	n.d.		MEG	n.d.	MEG	n.d.	MEG		n.d.	MEG		pathogenesis-related Bet v I family protein, putative, expressed
LOC_Os04g39240	5 and 7 DAP overlapped PEG		n.d.	n.d.	n.d.	n.d.	n.d.		n.d.	n.d.		expressed protein
LOC_Os04g39560	Persistent MEG		MEG	n.d.	n.d.	n.d.	MEG		n.d.	MEG		expressed protein
LOC_Os04g40660	Persistent PEG		n.d.	PEG	PEG	n.d.	PEG		PEG	PEG		MA3 domain containing protein, expressed
LOC_Os04g41110	3 DAP-specific PEG		n.d.	n.d.	n.d.	n.d.	n.d.		n.d.	n.d.		Rad21 / Rec8 like protein, putative, expressed
LOC_Os04g41470	Persistent PEG		n.d.	PEG	PEG	n.d.	PEG		PEG	PEG		expressed protein
LOC_Os04g41620	3 DAP-specific MEG		n.d.	n.d.	n.d.	n.d.	n.d.		n.d.	n.d.		CHIT2 - Chitinase family protein precursor, expressed
LOC_Os04g42230	3 DAP-specific PEG		n.d.	n.d.	n.d.	n.d.	n.d.		n.d.	n.d.		expressed protein
LOC_Os04g42250	Persistent PEG		PEG	PEG	PEG	n.d.	PEG		PEG	PEG		transferase family protein, putative, expressed
LOC_Os04g42260	Persistent PEG		n.d.	n.d.	PEG	n.d.	n.d.		n.d.	PEG		protein phosphatase 2C, putative, expressed
LOC_Os04g42600	Persistent PEG		n.d.	n.d.	PEG	n.d.	PEG		PEG	n.d.		polyadenylate-binding protein, putative, expressed
LOC_Os04g42634	Persistent PEG		n.d.	n.d.	n.d.	n.d.	n.d.		PEG	n.d.		expressed protein
LOC_Os04g43130	5 and 7 DAP overlapped PEG		n.d.	n.d.	n.d.	n.d.	n.d.		n.d.	n.d.		transcriptional corepressor LEUNIG, putative, expressed
LOC_Os04g44710	Persistent PEG		n.d.	n.d.	n.d.	n.d.	n.d.		n.d.	n.d.		double-stranded RNA binding motif containing protein, expressed
LOC_Os04g46020	Persistent PEG		n.d.	n.d.	n.d.	n.d.	n.d.		PEG	n.d.		GATA zinc finger domain containing protein, expressed
LOC_Os04g46300	5 DAP-specific MEG		n.d.	n.d.	n.d.	n.d.	n.d.		n.d.	n.d.		disease resistance protein RPM1, putative, expressed
LOC_Os04g46450	3 DAP-specific PEG		n.d.	n.d.	n.d.	n.d.	n.d.		n.d.	n.d.		zinc finger, C3HC4 type domain containing protein, expressed
LOC_Os04g47410	7 DAP-specific PEG		n.d.	n.d.	n.d.	n.d.	n.d.		n.d.	n.d.		DHHC zinc finger domain containing protein, expressed
LOC_Os04g47760	3 DAP-specific MEG		n.d.	n.d.	n.d.	n.d.	n.d.		n.d.	n.d.		transposon protein, putative, Pong sub-class, expressed
LOC_Os04g48240	3 DAP-specific MEG		n.d.	n.d.	n.d.	n.d.	n.d.		n.d.	n.d.		retrotransposon protein, putative, unclassified, expressed
LOC_Os04g49410	3 DAP-specific PEG		n.d.	n.d.	n.d.	n.d.	n.d.		n.d.	n.d.		expansin precursor, putative, expressed
LOC_Os04g51380	Persistent PEG		n.d.	n.d.	n.d.	n.d.	n.d.		n.d.	n.d.		protein-S-isoprenylcysteine O-methyltransferase. tax, putative, expressed
LOC_Os04g51786	3 DAP-specific MEG		n.d.	n.d.	n.d.	n.d.	n.d.		n.d.	n.d.		containing DUF163, putative, expressed
LOC_Os04g52220	3 DAP-specific MEG		n.d.	n.d.	n.d.	n.d.	n.d.		n.d.	n.d.		expressed protein
LOC_Os04g53450	5 and 7 DAP overlapped PEG		n.d.	n.d.	n.d.	n.d.	n.d.		PEG	n.d.		expressed protein
LOC_Os04g53740	3 DAP-specific PEG		n.d.	n.d.	n.d.	n.d.	n.d.		n.d.	n.d.		thioredoxin, putative, expressed
LOC_Os04g54420	n.d.		n.d.	n.d.	PEG	n.d.	PEG		PEG	PEG		protein of unknown function, DUF618 domain containing protein, expressed
LOC_Os04g55960	7 DAP-specific PEG		n.d.	n.d.	n.d.	n.d.	n.d.		n.d.	n.d.		NADPH reductase, putative, expressed
LOC_Os04g56700	n.d.		n.d.	n.d.	n.d.	n.d.	MEG		n.d.	MEG		naringenin,2-oxoglutarate 3-dioxygenase, putative, expressed
LOC_Os04g56720	5 and 7 DAP overlapped PEG		n.d.	PEG	PEG	n.d.	PEG		PEG	PEG		RCC2, putative, expressed
LOC_Os04g57190	5 DAP-specific MEG		n.d.	n.d.	n.d.	n.d.	n.d.		n.d.	n.d.		ubiquitin carboxyl-terminal hydrolase, family 1, putative, expressed
LOC_Os04g57640	Persistent PEG		n.d.	PEG	PEG	n.d.	PEG		PEG	PEG		RCD1, putative, expressed
LOC_Os04g57870	n.d.		n.d.	PEG	n.d.	n.d.	n.d.		PEG	n.d.		expressed protein
LOC_Os04g58610	3 DAP-specific MEG		n.d.	n.d.	n.d.	n.d.	n.d.		n.d.	n.d.		retrotransposon protein, putative, unclassified, expressed
LOC_Os04g58750	3 and 5 DAP overlapped PEG		n.d.	n.d.	n.d.	n.d.	n.d.		n.d.	n.d.		protein kinase family protein, putative, expressed
LOC_Os04g59394	3 DAP-specific PEG		n.d.	n.d.	n.d.	n.d.	n.d.		n.d.	n.d.		expressed protein
LOC_Os04g59400	3 DAP-specific PEG		n.d.	n.d.	n.d.	n.d.	n.d.		n.d.	n.d.		expressed protein
LOC_Os05g01020	Persistent PEG		n.d.	n.d.	n.d.	n.d.	n.d.		PEG	n.d.		transcriptional repressor, putative, expressed
LOC_Os05g01210	Persistent PEG		n.d.	PEG	PEG	n.d.	PEG		PEG	n.d.		expressed protein
LOC_Os05g01230	5 and 7 DAP overlapped PEG		n.d.	n.d.	n.d.	n.d.	PEG		PEG	n.d.		zinc finger, C3HC4 type domain containing protein, expressed
LOC_Os05g01240	5 and 7 DAP overlapped PEG		n.d.	PEG	PEG	n.d.	PEG		PEG	PEG		AML1, putative, expressed
LOC_Os05g01444	3 DAP-specific MEG		n.d.	n.d.	n.d.	n.d.	n.d.		n.d.	n.d.		polygalacturonase inhibitor precursor, putative, expressed
LOC_Os05g01710	Persistent PEG		n.d.	PEG	PEG	n.d.	n.d.		PEG	n.d.		transcription initiation factor IIA gamma chain, putative, expressed
LOC_Os05g02260	5 DAP-specific PEG		n.d.	n.d.	n.d.	n.d.	n.d.		n.d.	n.d.		expressed protein
LOC_Os05g03630	Persistent PEG		n.d.	n.d.	PEG	n.d.	PEG		n.d.	PEG		dnaJ domain containing protein, expressed
LOC_Os05g04330	Persistent PEG		n.d.	PEG	PEG	n.d.	PEG		PEG	PEG		DNA methyltransferase protein, putative, expressed
LOC_Os05g04520	5 and 7 DAP overlapped PEG		n.d.	n.d.	PEG	n.d.	PEG		n.d.	PEG		protein kinase, putative, expressed
LOC_Os05g04540	5 DAP-specific PEG		n.d.	n.d.	n.d.	n.d.	n.d.		PEG	n.d.		expressed protein
LOC_Os05g05230	3 DAP-specific PEG		n.d.	n.d.	n.d.	n.d.	n.d.		n.d.	n.d.		expressed protein
LOC_Os05g05390	3 DAP-specific PEG		n.d.	n.d.	n.d.	n.d.	n.d.		n.d.	n.d.		expressed protein
LOC_Os05g05660	Persistent MEG		n.d.	n.d.	n.d.	n.d.	n.d.		n.d.	n.d.		PWWP domain containing protein, expressed
LOC_Os05g05780	Persistent PEG		PEG	n.d.	PEG	n.d.	PEG		n.d.	PEG		chromatin-remodeling complex ATPase chain, putative, expressed
LOC_Os05g05790	5 and 7 DAP overlapped PEG		n.d.	n.d.	n.d.	n.d.	n.d.		n.d.	n.d.		double-stranded RNA binding motif containing protein, expressed
LOC_Os05g05800	Persistent PEG		n.d.	n.d.	n.d.	n.d.	n.d.		n.d.	n.d.		OsFBL21 - F-box domain and LRR containing protein, expressed
LOC_Os05g07670	7 DAP-specific PEG		n.d.	n.d.	n.d.	n.d.	n.d.		n.d.	n.d.		solute carrier family 35 member E3, putative, expressed
LOC_Os05g07720	Persistent PEG		n.d.	n.d.	n.d.	n.d.	n.d.		n.d.	n.d.		alliin lyase precursor, putative, expressed
LOC_Os05g08730	5 DAP-specific PEG		n.d.	n.d.	n.d.	n.d.	n.d.		n.d.	n.d.		early fruit transcript, putative, expressed
LOC_Os05g08840	Persistent PEG		n.d.	n.d.	n.d.	n.d.	n.d.		n.d.	PEG		DnaK family protein, putative, expressed
LOC_Os05g09620	3 DAP-specific PEG		n.d.	n.d.	n.d.	n.d.	n.d.		n.d.	n.d.		SCC3, putative, expressed
LOC_Os05g09708	5 and 7 DAP overlapped MEG		n.d.	n.d.	n.d.	n.d.	n.d.		n.d.	n.d.		expressed protein
LOC_Os05g10800	5 and 7 DAP overlapped MEG		MEG	MEG	MEG	n.d.	MEG		n.d.	MEG		expressed protein
LOC_Os05g11140	Persistent PEG		n.d.	n.d.	PEG	n.d.	n.d.		n.d.	PEG		CK1 CaseinKinase 1a.5 - CK1 includes the casein kinase 1 kinases, expressed
LOC_Os05g12170	5 and 7 DAP overlapped PEG		n.d.	n.d.	n.d.	n.d.	n.d.		n.d.	n.d.		plant-specific domain TIGR01589 family protein, putative, expressed
LOC_Os05g12460	3 DAP-specific PEG		n.d.	n.d.	n.d.	n.d.	n.d.		n.d.	n.d.		expressed protein
LOC_Os05g12490	5 DAP-specific MEG		n.d.	n.d.	n.d.	n.d.	n.d.		n.d.	n.d.		transporter-related, putative, expressed
LOC_Os05g12670	5 and 7 DAP overlapped PEG		n.d.	n.d.	n.d.	n.d.	n.d.		n.d.	n.d.		expressed protein
LOC_Os05g13940	3 and 5 DAP overlapped MEG		n.d.	n.d.	n.d.	n.d.	n.d.		n.d.	n.d.		retrotransposon protein, putative, unclassified, expressed
LOC_Os05g14440	3 and 7 DAP overlapped MEG		n.d.	n.d.	n.d.	n.d.	n.d.		n.d.	n.d.		transposon protein, putative, Ac/Ds sub-class, expressed
LOC_Os05g16140	3 DAP-specific PEG		n.d.	n.d.	n.d.	n.d.	n.d.		n.d.	n.d.		expressed protein
LOC_Os05g23420	3 and 5 DAP overlapped PEG		n.d.	n.d.	n.d.	n.d.	n.d.		n.d.	n.d.		sugar porter, putative, expressed
LOC_Os05g23870	7 DAP-specific MEG		n.d.	n.d.	n.d.	n.d.	n.d.		n.d.	n.d.		transposon protein, putative, Mutator sub-class, expressed
LOC_Os05g23910	3 and 5 DAP overlapped MEG		n.d.	n.d.	n.d.	n.d.	n.d.		n.d.	n.d.		histone-like transcription factor and archaeal histone, putative, expressed
LOC_Os05g23950	Persistent MEG		n.d.	n.d.	MEG	n.d.	MEG		MEG	n.d.		TRAF-type zinc finger family protein, expressed
LOC_Os05g24000	Persistent PEG		n.d.	PEG	PEG	n.d.	n.d.		PEG	n.d.		expressed protein
LOC_Os05g24340	3 DAP-specific MEG		n.d.	n.d.	n.d.	n.d.	n.d.		n.d.	n.d.		transposon protein, putative, CACTA, En/Spm sub-class, expressed
LOC_Os05g26032	3 DAP-specific MEG		n.d.	n.d.	n.d.	n.d.	n.d.		n.d.	n.d.		expressed protein
LOC_Os05g26040	Persistent MEG		MEG	MEG	MEG	n.d.	MEG		MEG	MEG		pumilio-family RNA binding repeat containing protein, expressed
LOC_Os05g26110	Persistent MEG		MEG	MEG	MEG	n.d.	MEG		MEG	MEG		transposon protein, putative, Mutator sub-class, expressed
LOC_Os05g26690	5 DAP-specific MEG		n.d.	n.d.	n.d.	n.d.	n.d.		n.d.	n.d.		PROLM15 - Prolamin precursor, putative, expressed
LOC_Os05g26720	5 DAP-specific MEG		n.d.	n.d.	n.d.	n.d.	n.d.		n.d.	n.d.		PROLM16 - Prolamin precursor, expressed
LOC_Os05g26750	5 and 7 DAP overlapped MEG		n.d.	n.d.	n.d.	n.d.	n.d.		n.d.	n.d.		PROLM17 - Prolamin precursor, expressed
LOC_Os05g26770	5 and 7 DAP overlapped MEG		n.d.	n.d.	n.d.	n.d.	n.d.		n.d.	n.d.		PROLM18 - Prolamin precursor, expressed
LOC_Os05g27920	3 DAP-specific PEG		n.d.	n.d.	n.d.	n.d.	n.d.		n.d.	n.d.		phox domain-containing protein, putative, expressed
LOC_Os05g28180	Persistent PEG		n.d.	n.d.	PEG	n.d.	PEG		n.d.	PEG		AMP deaminase, putative, expressed
LOC_Os05g28200	5 DAP-specific PEG		n.d.	n.d.	n.d.	n.d.	n.d.		n.d.	n.d.		prenyltransferase, putative, expressed
LOC_Os05g28440	Persistent PEG		n.d.	n.d.	n.d.	n.d.	n.d.		n.d.	n.d.		expressed protein
LOC_Os05g28860	Persistent PEG		n.d.	n.d.	n.d.	n.d.	n.d.		n.d.	n.d.		3'-5' exonuclease, putative, expressed
LOC_Os05g28870	5 and 7 DAP overlapped PEG		n.d.	n.d.	n.d.	n.d.	n.d.		n.d.	n.d.		mitochondrial carrier protein, putative, expressed
LOC_Os05g30000	n.d.		n.d.	n.d.	MEG	n.d.	n.d.		MEG	n.d.		expressed protein
LOC_Os05g30150	5 and 7 DAP overlapped MEG		n.d.	n.d.	n.d.	n.d.	n.d.		n.d.	n.d.		amino acid transporter family protein, putative, expressed
LOC_Os05g30400	n.d.		n.d.	n.d.	MEG	n.d.	n.d.		n.d.	MEG		expressed protein
LOC_Os05g30870	3 DAP-specific PEG		n.d.	n.d.	n.d.	n.d.	n.d.		n.d.	n.d.		protein kinase domain containing protein, expressed
LOC_Os05g31254	3 DAP-specific PEG		n.d.	n.d.	n.d.	n.d.	n.d.		n.d.	n.d.		acetyltransferase, GNAT family, putative, expressed
LOC_Os05g31380	Persistent PEG		n.d.	PEG	PEG	n.d.	PEG		PEG	PEG		GRAS family transcription factor containing protein, expressed
LOC_Os05g32570	5 DAP-specific PEG		n.d.	PEG	PEG	n.d.	PEG		PEG	n.d.		RING E3 ligase protein, putative, expressed
LOC_Os05g32880	3 DAP-specific PEG		n.d.	n.d.	n.d.	n.d.	n.d.		n.d.	n.d.		response regulator receiver domain containing protein, expressed
LOC_Os05g33550	3 DAP-specific PEG		n.d.	n.d.	n.d.	n.d.	n.d.		n.d.	n.d.		methyl-binding domain protein MBD, putative, expressed
LOC_Os05g34310	Persistent MEG		MEG	n.d.	MEG	n.d.	MEG		n.d.	MEG		no apical meristem protein, putative, expressed
LOC_Os05g34510	Persistent PEG		n.d.	n.d.	n.d.	n.d.	n.d.		n.d.	n.d.		expressed protein
LOC_Os05g34540	3 DAP-specific PEG		n.d.	n.d.	n.d.	n.d.	n.d.		n.d.	n.d.		rab GDP dissociation inhibitor alpha, putative, expressed
LOC_Os05g34550	3 DAP-specific PEG		n.d.	n.d.	n.d.	n.d.	n.d.		n.d.	n.d.		MLO domain containing protein, putative, expressed
LOC_Os05g34670	5 and 7 DAP overlapped MEG		n.d.	n.d.	n.d.	n.d.	n.d.		n.d.	n.d.		KH domain containing protein, putative, expressed
LOC_Os05g36090	5 DAP-specific MEG		n.d.	n.d.	n.d.	n.d.	n.d.		n.d.	n.d.		zinc finger DHHC domain-containing protein, putative, expressed
LOC_Os05g36380	5 DAP-specific MEG		n.d.	n.d.	n.d.	n.d.	n.d.		n.d.	n.d.		expressed protein
LOC_Os05g38600	5 and 7 DAP overlapped MEG		n.d.	MEG	MEG	n.d.	MEG		MEG	MEG		ZOS5-09 - C2H2 zinc finger protein, expressed
LOC_Os05g38640	5 and 7 DAP overlapped PEG		n.d.	n.d.	n.d.	n.d.	n.d.		PEG	n.d.		Core histone H2A/H2B/H3/H4 domain containing protein, putative, expressed
LOC_Os05g40790	Persistent MEG		MEG	MEG	MEG	n.d.	MEG		MEG	MEG		CCR4-NOT transcription factor, putative, expressed
LOC_Os05g40810	7 DAP-specific PEG		n.d.	n.d.	n.d.	n.d.	n.d.		n.d.	n.d.		BRCA1 C Terminus domain containing protein, expressed
LOC_Os05g41200	5 DAP-specific PEG		n.d.	n.d.	n.d.	n.d.	n.d.		n.d.	n.d.		OsCML9 - Calmodulin-related calcium sensor protein, expressed
LOC_Os05g41210	Persistent PEG		n.d.	PEG	n.d.	n.d.	n.d.		PEG	n.d.		OsCam2 - Calmodulin, expressed
LOC_Os05g41220	5 and 7 DAP overlapped PEG		PEG	PEG	PEG	n.d.	PEG		PEG	PEG		SNF1-related protein kinase regulatory subunit beta-1, putative, expressed
LOC_Os05g41790	Persistent PEG		n.d.	n.d.	PEG	n.d.	n.d.		PEG	n.d.		zinc finger C-x8-C-x5-C-x3-H type family protein, expressed
LOC_Os05g43480	Persistent PEG		n.d.	PEG	PEG	n.d.	PEG		PEG	PEG		ubiquitin carboxyl-terminal hydrolase domain containing protein, expressed
LOC_Os05g43560	5 DAP-specific PEG		n.d.	n.d.	n.d.	n.d.	n.d.		n.d.	n.d.		AGAP007115-PA, putative, expressed
LOC_Os05g43570	Persistent PEG		n.d.	n.d.	n.d.	n.d.	n.d.		PEG	PEG		AGC AGC other NDRh TRCd.2 - ACG kinases include homologs to PKA, PKG and PKC, expressed
LOC_Os05g45060	3 DAP-specific PEG		n.d.	n.d.	n.d.	n.d.	n.d.		n.d.	n.d.		RING-H2 finger protein ATL2M, putative, expressed
LOC_Os05g45830	3 DAP-specific PEG		n.d.	n.d.	n.d.	n.d.	n.d.		n.d.	n.d.		expressed protein
LOC_Os05g45930	5 and 7 DAP overlapped PEG		n.d.	n.d.	PEG	n.d.	n.d.		n.d.	PEG		IQ calmodulin-binding motif family protein, putative, expressed
LOC_Os05g46490	5 DAP-specific PEG		n.d.	n.d.	n.d.	n.d.	n.d.		n.d.	n.d.		mov34 family protein, putative, expressed
LOC_Os05g46660	7 DAP-specific MEG		n.d.	n.d.	n.d.	n.d.	n.d.		n.d.	MEG		transposon protein, putative, Mutator sub-class
LOC_Os05g48280	5 and 7 DAP overlapped PEG		n.d.	n.d.	n.d.	n.d.	n.d.		n.d.	n.d.		expressed protein
LOC_Os05g48560	Persistent PEG		PEG	n.d.	PEG	n.d.	PEG		n.d.	PEG		expressed protein
LOC_Os05g48590	5 and 7 DAP overlapped PEG		n.d.	n.d.	n.d.	n.d.	n.d.		n.d.	n.d.		OsIAA19 - Auxin-responsive Aux/IAA gene family member, expressed
LOC_Os05g48610	Persistent MEG		n.d.	n.d.	n.d.	n.d.	MEG		n.d.	MEG		expressed protein
LOC_Os05g48970	5 and 7 DAP overlapped PEG		n.d.	n.d.	n.d.	n.d.	n.d.		n.d.	n.d.		zinc finger, C3HC4 type domain containing protein, expressed
LOC_Os05g48980	Persistent PEG		n.d.	n.d.	PEG	n.d.	PEG		PEG	PEG		ras-related protein, putative, expressed
LOC_Os05g49120	3 and 5 DAP overlapped PEG		n.d.	n.d.	n.d.	n.d.	n.d.		n.d.	n.d.		NLI interacting factor-like phosphatase, putative, expressed
LOC_Os05g49380	3 DAP-specific MEG		n.d.	n.d.	n.d.	n.d.	n.d.		n.d.	n.d.		OsDegp9 - Putative Deg protease homologue, expressed
LOC_Os05g50390	Persistent MEG		MEG	n.d.	n.d.	n.d.	MEG		n.d.	MEG		expressed protein
LOC_Os05g50960	Persistent PEG		n.d.	n.d.	n.d.	n.d.	n.d.		n.d.	n.d.		polygalacturonase, putative, expressed
LOC_Os05g50970	Persistent PEG		n.d.	PEG	n.d.	n.d.	PEG		PEG	PEG		protein phosphatase 2C, putative, expressed
LOC_Os05g51400	Persistent PEG		n.d.	PEG	n.d.	n.d.	PEG		PEG	PEG		protein kinase APK1B, chloroplast precursor, putative, expressed
LOC_Os06g01200	3 DAP-specific PEG		n.d.	n.d.	n.d.	n.d.	n.d.		n.d.	n.d.		zinc finger, C3HC4 type domain containing protein, expressed
LOC_Os06g01680	Persistent PEG		n.d.	n.d.	PEG	n.d.	PEG		PEG	n.d.		expressed protein
LOC_Os06g02028	Persistent PEG		n.d.	PEG	PEG	n.d.	PEG		PEG	PEG		eyes absent homolog 4, putative, expressed
LOC_Os06g03770	3 and 7 DAP overlapped PEG		n.d.	n.d.	n.d.	n.d.	n.d.		n.d.	n.d.		ABC transporter, ATP-binding protein, putative, expressed
LOC_Os06g03860	7 DAP-specific PEG		n.d.	n.d.	n.d.	n.d.	n.d.		n.d.	n.d.		uncharacterized membrane protein, putative, expressed
LOC_Os06g04920	Persistent PEG		n.d.	n.d.	n.d.	n.d.	n.d.		n.d.	PEG		zinc finger family protein, putative, expressed
LOC_Os06g04930	Persistent PEG		n.d.	n.d.	n.d.	n.d.	PEG		PEG	n.d.		expressed protein
LOC_Os06g04940	5 DAP-specific PEG		n.d.	n.d.	n.d.	n.d.	n.d.		n.d.	n.d.		early nodulin 93 ENOD93 protein, putative, expressed
LOC_Os06g05550	n.d.		n.d.	n.d.	n.d.	n.d.	MEG		n.d.	MEG		GDSL-like lipase/acylhydrolase, putative, expressed
LOC_Os06g06090	3 DAP-specific PEG		n.d.	n.d.	n.d.	n.d.	n.d.		n.d.	n.d.		CGMC MAPKCMGC 2 ERK.12 - CGMC includes CDA, MAPK, GSK3, and CLKC kinases, expressed
LOC_Os06g06870	Persistent PEG		PEG	n.d.	PEG	n.d.	PEG		n.d.	PEG		zinc finger protein, putative, expressed
LOC_Os06g07230	3 DAP-specific MEG		n.d.	n.d.	n.d.	n.d.	n.d.		n.d.	n.d.		tyrosine protein kinase domain containing protein, putative, expressed
LOC_Os06g07700	Persistent PEG		n.d.	n.d.	n.d.	n.d.	n.d.		n.d.	n.d.		expressed protein
LOC_Os06g08740	Persistent PEG		PEG	PEG	PEG	n.d.	PEG		PEG	n.d.		expressed protein
LOC_Os06g10480	5 DAP-specific PEG		n.d.	n.d.	n.d.	n.d.	n.d.		n.d.	n.d.		expressed protein
LOC_Os06g10710	3 DAP-specific MEG		n.d.	n.d.	n.d.	n.d.	n.d.		n.d.	n.d.		expressed protein
LOC_Os06g11190	7 DAP-specific PEG		n.d.	n.d.	n.d.	n.d.	n.d.		n.d.	n.d.		OsPOP13 - Putative Prolyl Oligopeptidase homologue, expressed
LOC_Os06g11620	Persistent PEG		n.d.	n.d.	PEG	n.d.	PEG		n.d.	PEG		RNA recognition motif containing protein, putative, expressed
LOC_Os06g11730	Persistent MEG		MEG	MEG	MEG	n.d.	MEG		n.d.	MEG		RNA recognition motif containing protein, putative, expressed
LOC_Os06g11760	5 DAP-specific MEG		n.d.	n.d.	n.d.	n.d.	n.d.		n.d.	n.d.		expressed protein
LOC_Os06g12260	3 and 7 DAP overlapped PEG		n.d.	n.d.	n.d.	n.d.	n.d.		PEG	n.d.		N-rich protein, putative, expressed
LOC_Os06g12280	5 and 7 DAP overlapped PEG		n.d.	n.d.	n.d.	n.d.	n.d.		n.d.	n.d.		glycosyl transferase 8 domain containing protein, putative, expressed
LOC_Os06g12590	Persistent PEG		n.d.	n.d.	n.d.	n.d.	n.d.		n.d.	n.d.		protein kinase, putative, expressed
LOC_Os06g12680	3 and 5 DAP overlapped PEG		n.d.	n.d.	n.d.	n.d.	n.d.		n.d.	n.d.		RING-H2 finger protein, putative, expressed
LOC_Os06g13750	5 DAP-specific MEG		n.d.	n.d.	n.d.	n.d.	n.d.		n.d.	n.d.		expressed protein
LOC_Os06g13900	3 DAP-specific MEG		n.d.	n.d.	n.d.	n.d.	n.d.		n.d.	n.d.		transposon protein, putative, unclassified, expressed
LOC_Os06g14440	5 and 7 DAP overlapped PEG		n.d.	n.d.	PEG	n.d.	n.d.		PEG	n.d.		DRD1, putative, expressed
LOC_Os06g15430	n.d.		n.d.	n.d.	MEG	n.d.	MEG		n.d.	MEG		expressed protein
LOC_Os06g19650	5 and 7 DAP overlapped PEG		n.d.	n.d.	PEG	n.d.	n.d.		PEG	n.d.		expressed protein
LOC_Os06g19660	5 and 7 DAP overlapped PEG		n.d.	n.d.	n.d.	n.d.	n.d.		PEG	n.d.		WD domain, G-beta repeat domain containing protein, expressed
LOC_Os06g21600	Persistent PEG		n.d.	n.d.	n.d.	n.d.	n.d.		n.d.	n.d.		selenoprotein O, putative, expressed
LOC_Os06g21900	5 and 7 DAP overlapped PEG		n.d.	n.d.	PEG	n.d.	PEG		n.d.	PEG		expressed protein
LOC_Os06g23460	Persistent PEG		PEG	PEG	PEG	n.d.	n.d.		PEG	n.d.		KH domain containing protein, putative, expressed
LOC_Os06g24920	3 DAP-specific MEG		n.d.	n.d.	n.d.	n.d.	n.d.		n.d.	n.d.		SAR DNA-binding protein-like, putative, expressed
LOC_Os06g28820	Persistent PEG		n.d.	n.d.	n.d.	n.d.	n.d.		n.d.	n.d.		cycloartenol synthase, putative, expressed
LOC_Os06g29250	7 DAP-specific MEG		n.d.	n.d.	n.d.	n.d.	n.d.		n.d.	n.d.		expressed protein
LOC_Os06g29740	Persistent MEG		n.d.	n.d.	n.d.	n.d.	n.d.		n.d.	n.d.		OsFBX197 - F-box domain containing protein, expressed
LOC_Os06g30060	Persistent PEG		n.d.	PEG	PEG	n.d.	PEG		PEG	PEG		expressed protein
LOC_Os06g30280	5 and 7 DAP overlapped MEG		n.d.	MEG	MEG	n.d.	MEG		MEG	MEG		expressed protein
LOC_Os06g32944	Persistent MEG		n.d.	n.d.	n.d.	n.d.	n.d.		n.d.	n.d.		transposon protein, putative, Pong sub-class, expressed
LOC_Os06g33480	5 DAP-specific MEG		n.d.	n.d.	n.d.	n.d.	n.d.		n.d.	MEG		CAPIP1, putative, expressed
LOC_Os06g33640	5 and 7 DAP overlapped MEG		MEG	MEG	MEG	n.d.	MEG		MEG	MEG		CAPIP1, putative, expressed
LOC_Os06g33690	5 and 7 DAP overlapped MEG		MEG	MEG	MEG	n.d.	MEG		MEG	MEG		CAPIP1, putative, expressed
LOC_Os06g35030	5 DAP-specific PEG		n.d.	n.d.	n.d.	n.d.	n.d.		n.d.	n.d.		RNA recognition motif containing protein, putative, expressed
LOC_Os06g35160	Persistent PEG		n.d.	n.d.	n.d.	n.d.	n.d.		n.d.	n.d.		CAMK KIN1/SNF1/Nim1 like.26 - CAMK includes calcium/calmodulin depedent protein kinases, expressed
LOC_Os06g35530	Persistent PEG		n.d.	PEG	PEG	n.d.	PEG		PEG	n.d.		CGMC GSK.8 - CGMC includes CDA, MAPK, GSK3, and CLKC kinases, expressed
LOC_Os06g37160	7 DAP-specific PEG		n.d.	n.d.	n.d.	n.d.	n.d.		n.d.	n.d.		transmembrane 9 superfamily member, putative, expressed
LOC_Os06g37300	5 DAP-specific MEG		n.d.	n.d.	n.d.	n.d.	n.d.		n.d.	n.d.		cytochrome P450, putative, expressed
LOC_Os06g37640	7 DAP-specific PEG		n.d.	n.d.	n.d.	n.d.	n.d.		n.d.	n.d.		expressed protein
LOC_Os06g37660	7 DAP-specific PEG		n.d.	n.d.	n.d.	n.d.	n.d.		n.d.	n.d.		OsPP2Ac-1 - Phosphatase 2A isoform 1 belonging to family 1, expressed
LOC_Os06g37830	7 DAP-specific MEG		n.d.	n.d.	n.d.	n.d.	n.d.		MEG	n.d.		transposon protein, putative, CACTA, En/Spm sub-class, expressed
LOC_Os06g39760	n.d.		n.d.	n.d.	n.d.	n.d.	PEG		PEG	n.d.		WD domain, G-beta repeat domain containing protein, expressed
LOC_Os06g40490	Persistent PEG		PEG	PEG	PEG	n.d.	PEG		PEG	PEG		glycosyl hydrolases family 17, putative, expressed
LOC_Os06g40520	3 and 5 DAP overlapped MEG		n.d.	n.d.	n.d.	n.d.	n.d.		n.d.	n.d.		TNP1, putative, expressed
LOC_Os06g42910	3 DAP-specific PEG		n.d.	n.d.	n.d.	n.d.	n.d.		n.d.	n.d.		expressed protein
LOC_Os06g42990	3 and 5 DAP overlapped PEG		PEG	PEG	PEG	n.d.	PEG		PEG	PEG		AP2 domain containing protein, expressed
LOC_Os06g45000	Persistent PEG		n.d.	n.d.	n.d.	n.d.	n.d.		n.d.	n.d.		ubiquitin-conjugating enzyme, putative, expressed
LOC_Os06g45640	7 DAP-specific MEG		n.d.	n.d.	n.d.	n.d.	MEG		MEG	MEG		core histone H2A/H2B/H3/H4, putative, expressed
LOC_Os06g46435	3 and 7 DAP overlapped MEG		n.d.	n.d.	n.d.	n.d.	n.d.		n.d.	n.d.		NADPH-dependent oxidoreductase, putative, expressed
LOC_Os06g47290	Persistent PEG		n.d.	n.d.	n.d.	n.d.	n.d.		n.d.	n.d.		growth regulator related protein, putative, expressed
LOC_Os06g47294	5 and 7 DAP overlapped PEG		n.d.	n.d.	n.d.	n.d.	n.d.		n.d.	n.d.		methyltransferase, putative, expressed
LOC_Os06g47830	3 DAP-specific PEG		n.d.	n.d.	n.d.	n.d.	n.d.		n.d.	n.d.		RPA2C - Putative single-stranded DNA binding complex subunit 2, expressed
LOC_Os06g48320	7 DAP-specific MEG		n.d.	n.d.	n.d.	n.d.	n.d.		n.d.	n.d.		EDR2, putative, expressed
LOC_Os06g48660	5 DAP-specific MEG		n.d.	n.d.	n.d.	n.d.	n.d.		n.d.	n.d.		DEFL21 - Defensin and Defensin-like DEFL family, expressed
LOC_Os06g51490	3 DAP-specific MEG		n.d.	n.d.	n.d.	n.d.	n.d.		n.d.	n.d.		PHD-finger domain containing protein, putative, expressed
LOC_Os07g01400	5 DAP-specific MEG		n.d.	n.d.	n.d.	n.d.	n.d.		n.d.	n.d.		peroxidase precursor, putative, expressed
LOC_Os07g01450	Persistent MEG		n.d.	MEG	n.d.	n.d.	n.d.		MEG	n.d.		DNA directed RNA polymerase, 7 kDa subunit domain containing protein, expressed
LOC_Os07g01460	3 DAP-specific PEG		n.d.	n.d.	n.d.	n.d.	n.d.		n.d.	n.d.		expressed protein
LOC_Os07g01690	n.d.		n.d.	MEG	n.d.	n.d.	n.d.		MEG	n.d.		expressed protein
LOC_Os07g01900	Persistent MEG		n.d.	n.d.	n.d.	n.d.	n.d.		n.d.	n.d.		expressed protein
LOC_Os07g01940	7 DAP-specific PEG		n.d.	n.d.	n.d.	n.d.	n.d.		n.d.	n.d.		sister chromatid cohesion 2, putative, expressed
LOC_Os07g02280	5 DAP-specific PEG		n.d.	n.d.	n.d.	n.d.	n.d.		n.d.	n.d.		pentatricopeptide, putative, expressed
LOC_Os07g02290	3 DAP-specific PEG		n.d.	n.d.	n.d.	n.d.	n.d.		n.d.	n.d.		OsFBX208 - F-box domain containing protein, expressed
LOC_Os07g04220	3 and 7 DAP overlapped PEG		n.d.	n.d.	n.d.	n.d.	n.d.		PEG	n.d.		wound and phytochrome signaling involved receptor like kinase, putative, expressed
LOC_Os07g04530	n.d.		n.d.	MEG	MEG	n.d.	n.d.		MEG	n.d.		GYF domain containing protein, putative, expressed
LOC_Os07g04550	n.d.		n.d.	MEG	MEG	n.d.	n.d.		MEG	n.d.		pleckstrin homology domain-containing protein, putative, expressed
LOC_Os07g06610	Persistent PEG		n.d.	n.d.	n.d.	n.d.	n.d.		n.d.	n.d.		ubiquitin carboxyl-terminal hydrolase domain containing protein, expressed
LOC_Os07g06980	Persistent PEG		n.d.	n.d.	n.d.	n.d.	n.d.		n.d.	n.d.		histone deacetylase, putative, expressed
LOC_Os07g08370	5 and 7 DAP overlapped MEG		n.d.	n.d.	n.d.	n.d.	n.d.		n.d.	n.d.		expressed protein
LOC_Os07g08880	3 and 7 DAP overlapped MEG		n.d.	MEG	MEG	n.d.	MEG		MEG	n.d.		ES43 protein, putative, expressed
LOC_Os07g09020	Persistent MEG		MEG	MEG	MEG	n.d.	MEG		n.d.	MEG		argonaute, putative, expressed
LOC_Os07g10840	3 DAP-specific MEG		n.d.	n.d.	n.d.	n.d.	n.d.		n.d.	n.d.		uncharacterized glycosyltransferase, putative, expressed
LOC_Os07g11120	5 and 7 DAP overlapped MEG		n.d.	n.d.	n.d.	n.d.	n.d.		n.d.	n.d.		hydrolase, NUDIX family, domain containing protein, expressed
LOC_Os07g12130	5 DAP-specific MEG		n.d.	n.d.	n.d.	n.d.	MEG		MEG	MEG		MYB family transcription factor, putative, expressed
LOC_Os07g12260	Persistent MEG		MEG	n.d.	MEG	n.d.	MEG		MEG	MEG		retrotransposon protein, putative, unclassified, expressed
LOC_Os07g12490	Persistent PEG		PEG	PEG	PEG	n.d.	PEG		PEG	PEG		KH domain containing protein, putative, expressed
LOC_Os07g12510	7 DAP-specific PEG		n.d.	n.d.	n.d.	n.d.	n.d.		n.d.	n.d.		AP2 domain containing protein, expressed
LOC_Os07g12630	3 and 7 DAP overlapped PEG		n.d.	n.d.	n.d.	n.d.	PEG		PEG	n.d.		transcription elongation factor protein, putative, expressed
LOC_Os07g17210	Persistent PEG		n.d.	n.d.	PEG	n.d.	n.d.		PEG	n.d.		FAS1, putative, expressed
LOC_Os07g17300	7 DAP-specific MEG		n.d.	n.d.	n.d.	n.d.	n.d.		n.d.	n.d.		expressed protein
LOC_Os07g17360	7 DAP-specific PEG		n.d.	n.d.	PEG	n.d.	n.d.		PEG	n.d.		transposon protein, putative, unclassified, expressed
LOC_Os07g17460	Persistent PEG		PEG	PEG	PEG	n.d.	PEG		PEG	PEG		OsFBL36 - F-box domain and LRR containing protein, expressed
LOC_Os07g17520	5 DAP-specific PEG		n.d.	n.d.	n.d.	n.d.	n.d.		n.d.	PEG		expressed protein
LOC_Os07g18610	3 DAP-specific PEG		n.d.	n.d.	n.d.	n.d.	n.d.		n.d.	n.d.		OsFBLD7 - F-box, LRR and FBD domain containing protein, expressed
LOC_Os07g18670	3 DAP-specific PEG		n.d.	n.d.	n.d.	n.d.	n.d.		n.d.	n.d.		expressed protein
LOC_Os07g18720	Persistent PEG		n.d.	n.d.	PEG	n.d.	PEG		n.d.	PEG		tetratricopeptide repeat containing protein, putative, expressed
LOC_Os07g20110	Persistent MEG		n.d.	MEG	MEG	n.d.	MEG		MEG	MEG		expressed protein
LOC_Os07g27030	Persistent MEG		n.d.	n.d.	n.d.	n.d.	MEG		n.d.	MEG		OsFBX236 - F-box domain containing protein, expressed
LOC_Os07g27110	Persistent PEG		n.d.	n.d.	PEG	n.d.	PEG		PEG	PEG		RNA recognition motif containing protein, expressed
LOC_Os07g27150	5 DAP-specific PEG		n.d.	n.d.	n.d.	n.d.	n.d.		PEG	n.d.		trafficking protein particle complex subunit 4, putative, expressed
LOC_Os07g27300	Persistent PEG		PEG	PEG	PEG	n.d.	PEG		PEG	n.d.		RNA-binding protein Luc7-like, putative, expressed
LOC_Os07g27359	n.d.		MEG	MEG	MEG	n.d.	n.d.		MEG	n.d.		expressed protein
LOC_Os07g27430	3 DAP-specific PEG		n.d.	n.d.	n.d.	n.d.	n.d.		n.d.	n.d.		expressed protein
LOC_Os07g27450	Persistent PEG		n.d.	n.d.	n.d.	n.d.	n.d.		n.d.	n.d.		expressed protein
LOC_Os07g28850	3 and 5 DAP overlapped MEG		n.d.	n.d.	n.d.	n.d.	n.d.		n.d.	n.d.		retrotransposon protein, putative, unclassified, expressed
LOC_Os07g32360	Persistent MEG		MEG	n.d.	MEG	n.d.	MEG		MEG	MEG		expressed protein
LOC_Os07g32370	7 DAP-specific MEG		n.d.	n.d.	n.d.	n.d.	MEG		MEG	MEG		transposon protein, putative, unclassified, expressed
LOC_Os07g32412	3 and 7 DAP overlapped PEG		n.d.	n.d.	n.d.	n.d.	PEG		PEG	n.d.		transposon protein, putative, unclassified, expressed
LOC_Os07g32450	7 DAP-specific PEG		n.d.	n.d.	n.d.	n.d.	n.d.		n.d.	n.d.		protein kinase PKN/PRK1, effector, putative, expressed
LOC_Os07g32774	Persistent PEG		n.d.	n.d.	n.d.	n.d.	n.d.		n.d.	n.d.		chorismate mutase/prephenate dehydratase, putative, expressed
LOC_Os07g34550	Persistent MEG		n.d.	MEG	n.d.	n.d.	n.d.		MEG	n.d.		retrotransposon protein, putative, unclassified, expressed
LOC_Os07g34620	Persistent MEG		MEG	MEG	MEG	n.d.	MEG		MEG	MEG		expressed protein
LOC_Os07g36920	n.d.		n.d.	MEG	MEG	n.d.	MEG		MEG	n.d.		OsFBX255 - F-box domain containing protein, expressed
LOC_Os07g38080	7 DAP-specific PEG		n.d.	n.d.	n.d.	n.d.	n.d.		n.d.	n.d.		homeodomain-like, putative, expressed
LOC_Os07g39020	3 DAP-specific MEG		n.d.	n.d.	n.d.	n.d.	n.d.		n.d.	n.d.		OsSub53 - Putative Subtilisin homologue, expressed
LOC_Os07g39400	3 DAP-specific PEG		n.d.	n.d.	n.d.	n.d.	n.d.		n.d.	n.d.		polyol transporter 5, putative, expressed
LOC_Os07g39950	5 DAP-specific MEG		n.d.	n.d.	n.d.	n.d.	n.d.		n.d.	n.d.		mitotic checkpoint protein, putative, expressed
LOC_Os07g41160	3 and 5 DAP overlapped PEG		n.d.	n.d.	n.d.	n.d.	n.d.		n.d.	n.d.		protein of unknown function DUF1675 domain containing protein, expressed
LOC_Os07g41240	3 DAP-specific PEG		n.d.	n.d.	n.d.	n.d.	n.d.		n.d.	n.d.		cytochrome P450, putative, expressed
LOC_Os07g41650	5 and 7 DAP overlapped MEG		MEG	MEG	MEG	n.d.	n.d.		MEG	MEG		pectinesterase, putative, expressed
LOC_Os07g42150	3 DAP-specific MEG		n.d.	n.d.	n.d.	n.d.	n.d.		n.d.	n.d.		transcription initiation factor IID, putative, expressed
LOC_Os07g42180	3 DAP-specific PEG		n.d.	n.d.	n.d.	n.d.	n.d.		n.d.	n.d.		exportin 1, putative, expressed
LOC_Os07g42390	Persistent MEG		n.d.	n.d.	PEG	n.d.	n.d.		MEG	n.d.		DUF581 domain containing protein, expressed
LOC_Os07g42760	3 DAP-specific PEG		n.d.	n.d.	n.d.	n.d.	n.d.		n.d.	n.d.		expressed protein
LOC_Os07g42770	Persistent PEG		n.d.	PEG	PEG	n.d.	n.d.		PEG	n.d.		CAMK CAMK like.35 - CAMK includes calcium/calmodulin depedent protein kinases, expressed
LOC_Os07g43160	Persistent PEG		n.d.	n.d.	n.d.	n.d.	n.d.		n.d.	n.d.		uncharacterized glycosyl hydrolase Rv2006/MT2062, putative, expressed
LOC_Os07g44060	3 DAP-specific MEG		n.d.	n.d.	MEG	n.d.	n.d.		n.d.	MEG		haloacid dehalogenase-like hydrolase family protein, putative, expressed
LOC_Os07g45064	3 and 5 DAP overlapped PEG		n.d.	n.d.	n.d.	n.d.	n.d.		PEG	n.d.		Phosphatidylinositol kinase and FAT containing domain protein, putative, expressed
LOC_Os07g45070	Persistent PEG		n.d.	n.d.	n.d.	n.d.	n.d.		n.d.	n.d.		FAT domain-containing protein, putative, expressed
LOC_Os07g45400	Persistent PEG		n.d.	n.d.	PEG	n.d.	n.d.		PEG	PEG		expressed protein
LOC_Os07g47160	n.d.		n.d.	n.d.	MEG	n.d.	MEG		n.d.	MEG		OsFBX259 - F-box domain containing protein, expressed
LOC_Os07g48030	n.d.		n.d.	n.d.	MEG	n.d.	n.d.		n.d.	MEG		peroxidase precursor, putative, expressed
LOC_Os07g48110	3 and 5 DAP overlapped MEG		n.d.	n.d.	n.d.	n.d.	n.d.		n.d.	n.d.		expressed protein
LOC_Os07g48160	5 and 7 DAP overlapped PEG		n.d.	n.d.	n.d.	n.d.	n.d.		n.d.	n.d.		alpha-galactosidase precursor, putative, expressed
LOC_Os07g48170	Persistent PEG		n.d.	n.d.	PEG	n.d.	n.d.		PEG	PEG		nucleotidyltransferase, putative, expressed
LOC_Os07g48180	5 and 7 DAP overlapped PEG		n.d.	n.d.	n.d.	n.d.	n.d.		n.d.	n.d.		bZIP transcription factor domain containing protein, expressed
LOC_Os07g48229	7 DAP-specific PEG		n.d.	n.d.	n.d.	n.d.	n.d.		n.d.	n.d.		vacuolar-sorting receptor precursor, putative, expressed
LOC_Os07g48260	3 DAP-specific PEG		n.d.	n.d.	n.d.	n.d.	n.d.		n.d.	PEG		WRKY47, expressed
LOC_Os07g48400	Persistent MEG		n.d.	MEG	MEG	n.d.	MEG		MEG	MEG		retrotransposon protein, putative, unclassified, expressed
LOC_Os07g48910	3 DAP-specific MEG		n.d.	n.d.	n.d.	n.d.	n.d.		n.d.	n.d.		retrotransposon protein, putative, unclassified, expressed
LOC_Os07g49460	5 DAP-specific PEG		n.d.	n.d.	n.d.	n.d.	n.d.		n.d.	n.d.		response regulator receiver domain containing protein, expressed
LOC_Os08g01040	5 and 7 DAP overlapped PEG		n.d.	PEG	n.d.	n.d.	PEG		n.d.	PEG		zinc finger, C3HC4 type domain containing protein, expressed
LOC_Os08g01054	Persistent PEG		PEG	PEG	PEG	n.d.	PEG		PEG	PEG		retrotransposon protein, putative, unclassified, expressed
LOC_Os08g01570	Persistent MEG		n.d.	MEG	n.d.	n.d.	MEG		MEG	MEG		retrotransposon protein, putative, unclassified, expressed
LOC_Os08g01680	3 and 5 DAP overlapped PEG		n.d.	n.d.	n.d.	n.d.	n.d.		n.d.	n.d.		WD domain, G-beta repeat domain containing protein, expressed
LOC_Os08g01900	7 DAP-specific PEG		n.d.	n.d.	n.d.	n.d.	n.d.		n.d.	n.d.		armadillo/beta-catenin repeat family protein, putative, expressed
LOC_Os08g02690	n.d.		n.d.	n.d.	n.d.	n.d.	PEG		PEG	n.d.		MA3 domain containing protein, expressed
LOC_Os08g03350	3 DAP-specific MEG		n.d.	n.d.	n.d.	n.d.	n.d.		n.d.	n.d.		amino acid transporter, putative, expressed
LOC_Os08g03470	Persistent MEG		MEG	MEG	MEG	n.d.	MEG		MEG	MEG		MBTB15 - Bric-a-Brac, Tramtrack, Broad Complex BTB domain with Meprin and TRAF Homology MATH domain, expressed
LOC_Os08g04290	Persistent MEG		MEG	MEG	MEG	n.d.	MEG		MEG	MEG		WD domain, G-beta repeat domain containing protein, expressed
LOC_Os08g06330	Persistent MEG		n.d.	n.d.	n.d.	n.d.	n.d.		n.d.	MEG		zinc finger C-x8-C-x5-C-x3-H type family protein, expressed
LOC_Os08g06420	3 and 5 DAP overlapped PEG		n.d.	n.d.	n.d.	n.d.	n.d.		n.d.	n.d.		abhydrolase domain-containing protein FAM108C1, putative, expressed
LOC_Os08g07710	n.d.		n.d.	n.d.	n.d.	n.d.	MEG		n.d.	MEG		hypothetical protein
LOC_Os08g08000	Persistent PEG		n.d.	n.d.	PEG	n.d.	PEG		n.d.	PEG		DNA binding protein, putative, expressed
LOC_Os08g08960	5 and 7 DAP overlapped MEG		MEG	MEG	MEG	n.d.	MEG		n.d.	MEG		Cupin domain containing protein, expressed
LOC_Os08g09570	3 DAP-specific PEG		n.d.	n.d.	n.d.	n.d.	n.d.		n.d.	n.d.		expressed protein
LOC_Os08g09700	5 and 7 DAP overlapped MEG		MEG	n.d.	MEG	n.d.	MEG		MEG	MEG		OsFBX270 - F-box domain containing protein, expressed
LOC_Os08g12750	5 and 7 DAP overlapped PEG		n.d.	n.d.	n.d.	n.d.	n.d.		n.d.	n.d.		serine/threonine-protein kinase HT1, putative, expressed
LOC_Os08g13110	Persistent PEG		n.d.	n.d.	n.d.	n.d.	n.d.		n.d.	n.d.		hypothetical protein
LOC_Os08g13130	3 DAP-specific PEG		n.d.	n.d.	n.d.	n.d.	n.d.		n.d.	n.d.		expressed protein
LOC_Os08g13350	Persistent PEG		n.d.	n.d.	PEG	n.d.	PEG		PEG	PEG		expressed protein
LOC_Os08g15840	7 DAP-specific MEG		n.d.	MEG	MEG	n.d.	MEG		MEG	n.d.		ankyrin repeat-rich protein, putative, expressed
LOC_Os08g19590	5 and 7 DAP overlapped MEG		n.d.	MEG	MEG	n.d.	MEG		MEG	MEG		Homeobox domain containing protein, expressed
LOC_Os08g23580	7 DAP-specific MEG		n.d.	n.d.	n.d.	n.d.	n.d.		n.d.	n.d.		transposon protein, putative, CACTA, En/Spm sub-class, expressed
LOC_Os08g23590	5 and 7 DAP overlapped MEG		n.d.	n.d.	n.d.	n.d.	n.d.		n.d.	n.d.		ankyrin repeat domain containing protein, expressed
LOC_Os08g24400	Persistent PEG		n.d.	n.d.	PEG	n.d.	PEG		n.d.	PEG		SWP, putative, expressed
LOC_Os08g24420	Persistent PEG		PEG	PEG	PEG	n.d.	PEG		PEG	PEG		SWP, putative, expressed
LOC_Os08g24946	7 DAP-specific PEG		n.d.	n.d.	n.d.	n.d.	n.d.		n.d.	n.d.		EDM2, putative, expressed
LOC_Os08g26990	3 DAP-specific MEG		n.d.	n.d.	n.d.	n.d.	n.d.		n.d.	n.d.		response regulator receiver domain containing protein, expressed
LOC_Os08g27240	Persistent PEG		PEG	n.d.	PEG	n.d.	PEG		n.d.	PEG		ARID/BRIGHT DNA-binding domain containing protein, expressed
LOC_Os08g27860	Persistent PEG		n.d.	n.d.	n.d.	n.d.	n.d.		n.d.	n.d.		EARLY flowering protein, putative, expressed
LOC_Os08g27870	Persistent MEG		MEG	MEG	MEG	n.d.	MEG		MEG	MEG		EARLY flowering protein, putative, expressed
LOC_Os08g28010	7 DAP-specific MEG		n.d.	n.d.	n.d.	n.d.	n.d.		n.d.	n.d.		expressed protein
LOC_Os08g28160	3 DAP-specific MEG		n.d.	n.d.	n.d.	n.d.	n.d.		n.d.	n.d.		hypothetical protein
LOC_Os08g28170	5 and 7 DAP overlapped MEG		n.d.	n.d.	n.d.	n.d.	n.d.		n.d.	n.d.		nucleobase-ascorbate transporter, putative, expressed
LOC_Os08g28940	Persistent MEG		n.d.	MEG	MEG	n.d.	MEG		MEG	MEG		OsFBX289 - F-box domain containing protein, expressed
LOC_Os08g28960	Persistent MEG		MEG	MEG	MEG	n.d.	MEG		MEG	MEG		expressed protein
LOC_Os08g29520	5 and 7 DAP overlapped PEG		n.d.	n.d.	n.d.	n.d.	n.d.		n.d.	n.d.		cytochrome b561, putative, expressed
LOC_Os08g29580	Persistent MEG		n.d.	n.d.	n.d.	n.d.	MEG		n.d.	MEG		expressed protein
LOC_Os08g32350	n.d.		n.d.	MEG	n.d.	n.d.	n.d.		MEG	n.d.		expressed protein
LOC_Os08g33390	5 DAP-specific PEG		n.d.	n.d.	n.d.	n.d.	n.d.		n.d.	n.d.		Regulator of chromosome condensation domain containing protein, expressed
LOC_Os08g34690	3 DAP-specific MEG		n.d.	n.d.	n.d.	n.d.	n.d.		n.d.	n.d.		transposon protein, putative, unclassified, expressed
LOC_Os08g35000	5 DAP-specific PEG		n.d.	n.d.	n.d.	n.d.	n.d.		n.d.	n.d.		ARID/BRIGHT DNA-binding domain containing protein, expressed
LOC_Os08g35050	Persistent PEG		n.d.	n.d.	PEG	n.d.	PEG		n.d.	PEG		ARID/BRIGHT DNA-binding domain containing protein, expressed
LOC_Os08g38850	5 and 7 DAP overlapped MEG		MEG	MEG	MEG	n.d.	MEG		MEG	MEG		phosphatidylinositol transfer, putative, expressed
LOC_Os08g40350	3 DAP-specific MEG		n.d.	n.d.	n.d.	n.d.	n.d.		n.d.	n.d.		expressed protein
LOC_Os08g40620	Persistent PEG		n.d.	n.d.	PEG	n.d.	PEG		PEG	n.d.		rabGAP/TBC domain-containing protein, putative, expressed
LOC_Os08g40820	Persistent PEG		n.d.	n.d.	n.d.	n.d.	n.d.		n.d.	n.d.		expressed protein
LOC_Os08g41700	Persistent PEG		n.d.	PEG	PEG	n.d.	PEG		PEG	PEG		expressed protein
LOC_Os08g41710	Persistent PEG		PEG	PEG	PEG	n.d.	PEG		PEG	PEG		FHA domain containing protein, putative, expressed
LOC_Os08g41790	Persistent PEG		n.d.	n.d.	PEG	n.d.	PEG		PEG	n.d.		phosphoribulokinase/Uridine kinase family protein, expressed
LOC_Os08g42350	7 DAP-specific MEG		MEG	MEG	MEG	n.d.	MEG		n.d.	MEG		nodulin MtN3 family protein, putative, expressed
LOC_Os08g42640	Persistent PEG		n.d.	n.d.	n.d.	n.d.	n.d.		n.d.	n.d.		zinc finger, C3HC4 type domain containing protein, expressed
LOC_Os08g42750	5 DAP-specific MEG		n.d.	n.d.	n.d.	n.d.	n.d.		n.d.	n.d.		CAMK CAMK like.37 - CAMK includes calcium/calmodulin depedent protein kinases, expressed
LOC_Os08g42980	Persistent PEG		n.d.	n.d.	PEG	n.d.	PEG		PEG	PEG		la domain containing protein, expressed
LOC_Os08g43380	3 DAP-specific PEG		n.d.	n.d.	n.d.	n.d.	PEG		PEG	n.d.		TBC domain containing protein, expressed
LOC_Os08g44170	Persistent MEG		n.d.	n.d.	n.d.	n.d.	n.d.		MEG	n.d.		transposon protein, putative, unclassified, expressed
LOC_Os08g44180	3 and 5 DAP overlapped MEG		n.d.	n.d.	n.d.	n.d.	n.d.		n.d.	n.d.		expressed protein
LOC_Os08g44860	5 DAP-specific PEG		n.d.	n.d.	n.d.	n.d.	n.d.		n.d.	n.d.		aminopeptidase, putative, expressed
LOC_Os08g45130	Persistent PEG		n.d.	n.d.	n.d.	n.d.	n.d.		n.d.	n.d.		histone-lysine N-methyltransferase, putative, expressed
LOC_Os08g45240	5 DAP-specific MEG		n.d.	n.d.	n.d.	n.d.	n.d.		n.d.	n.d.		RNA recognition motif containing protein, putative, expressed
LOC_Os09g01780	3 DAP-specific MEG		n.d.	n.d.	n.d.	n.d.	n.d.		n.d.	n.d.		transposon protein, putative, unclassified, expressed
LOC_Os09g01790	7 DAP-specific MEG		n.d.	n.d.	n.d.	n.d.	n.d.		n.d.	n.d.		expressed protein
LOC_Os09g02150	n.d.		n.d.	MEG	n.d.	n.d.	n.d.		MEG	n.d.		expressed protein
LOC_Os09g02540	5 DAP-specific MEG		n.d.	n.d.	n.d.	n.d.	n.d.		n.d.	n.d.		expressed protein
LOC_Os09g02690	Persistent MEG		MEG	MEG	n.d.	n.d.	MEG		n.d.	MEG		expressed protein
LOC_Os09g02780	3 DAP-specific PEG		n.d.	n.d.	n.d.	n.d.	n.d.		n.d.	n.d.		OsMADS77 - MADS-box family gene with M-alpha type-box, expressed
LOC_Os09g02790	3 DAP-specific PEG		n.d.	n.d.	n.d.	n.d.	n.d.		n.d.	n.d.		zinc-binding protein, putative, expressed
LOC_Os09g03080	3 DAP-specific PEG		n.d.	n.d.	n.d.	n.d.	n.d.		n.d.	n.d.		conserved hypothetical protein
LOC_Os09g03090	Persistent PEG		PEG	n.d.	n.d.	n.d.	PEG		PEG	PEG		expressed protein
LOC_Os09g03500	Persistent MEG		MEG	MEG	n.d.	n.d.	MEG		MEG	MEG		ZOS9-01 - C2H2 zinc finger protein, expressed
LOC_Os09g03630	3 DAP-specific PEG		n.d.	n.d.	n.d.	n.d.	n.d.		n.d.	n.d.		ankyrin, putative, expressed
LOC_Os09g06230	7 DAP-specific PEG		n.d.	n.d.	n.d.	n.d.	n.d.		n.d.	n.d.		serine/threonine-protein kinase 16, putative, expressed
LOC_Os09g06910	Persistent MEG		n.d.	n.d.	n.d.	n.d.	n.d.		n.d.	n.d.		retrotransposon protein, putative, unclassified, expressed
LOC_Os09g06950	Persistent MEG		n.d.	MEG	n.d.	n.d.	MEG		MEG	MEG		expressed protein
LOC_Os09g07940	Persistent MEG		MEG	MEG	MEG	n.d.	n.d.		MEG	MEG		retrotransposon protein, putative, unclassified, expressed
LOC_Os09g08000	3 DAP-specific MEG		n.d.	n.d.	n.d.	n.d.	n.d.		n.d.	n.d.		expressed protein
LOC_Os09g08300	3 DAP-specific MEG		n.d.	n.d.	n.d.	n.d.	n.d.		n.d.	n.d.		expressed protein
LOC_Os09g09350	3 DAP-specific MEG		n.d.	n.d.	n.d.	n.d.	n.d.		n.d.	n.d.		expressed protein
LOC_Os09g10330	5 and 7 DAP overlapped MEG		n.d.	n.d.	n.d.	n.d.	n.d.		n.d.	MEG		expressed protein
LOC_Os09g11380	Persistent MEG		n.d.	n.d.	n.d.	n.d.	n.d.		n.d.	n.d.		expressed protein
LOC_Os09g11760	5 and 7 DAP overlapped PEG		n.d.	n.d.	n.d.	n.d.	n.d.		n.d.	n.d.		expressed protein
LOC_Os09g11900	3 and 5 DAP overlapped MEG		n.d.	n.d.	n.d.	n.d.	n.d.		n.d.	MEG		expressed protein
LOC_Os09g14680	Persistent PEG		n.d.	n.d.	n.d.	n.d.	n.d.		n.d.	n.d.		expressed protein
LOC_Os09g15540	5 DAP-specific MEG		n.d.	n.d.	n.d.	n.d.	n.d.		n.d.	n.d.		OsFBX312 - F-box domain containing protein, expressed
LOC_Os09g16520	Persistent PEG		n.d.	n.d.	n.d.	n.d.	n.d.		n.d.	n.d.		cytochrome b5-like Heme/Steroid binding domain containing protein, expressed
LOC_Os09g17620	5 DAP-specific MEG		n.d.	n.d.	n.d.	n.d.	n.d.		n.d.	n.d.		ubiquitin domain-containing protein 2, putative, expressed
LOC_Os09g17800	3 DAP-specific MEG		n.d.	n.d.	n.d.	n.d.	n.d.		n.d.	n.d.		retrotransposon protein, putative, unclassified, expressed
LOC_Os09g20010	Persistent PEG		n.d.	n.d.	PEG	n.d.	PEG		PEG	n.d.		SNF1-related protein kinase regulatory subunit beta-2, putative, expressed
LOC_Os09g20340	Persistent PEG		n.d.	n.d.	n.d.	n.d.	n.d.		n.d.	n.d.		DUF630/DUF632 domains containing protein, putative, expressed
LOC_Os09g20650	Persistent PEG		PEG	PEG	PEG	n.d.	PEG		PEG	PEG		OsFBX323 - F-box domain containing protein, expressed
LOC_Os09g23690	Persistent PEG		n.d.	n.d.	n.d.	n.d.	n.d.		n.d.	n.d.		UBX domain containing protein, expressed
LOC_Os09g23720	5 DAP-specific PEG		n.d.	n.d.	n.d.	n.d.	n.d.		n.d.	n.d.		expressed protein
LOC_Os09g24290	5 and 7 DAP overlapped MEG		n.d.	n.d.	n.d.	n.d.	n.d.		n.d.	n.d.		agenet domain-containing protein, putative, expressed
LOC_Os09g25160	Persistent MEG		n.d.	n.d.	n.d.	n.d.	MEG		MEG	n.d.		retrotransposon protein, putative, unclassified, expressed
LOC_Os09g25170	3 and 7 DAP overlapped MEG		n.d.	n.d.	MEG	n.d.	MEG		MEG	n.d.		retrotransposon protein, putative, unclassified, expressed
LOC_Os09g26470	Persistent MEG		MEG	MEG	MEG	n.d.	n.d.		MEG	n.d.		zinc finger, C3HC4 type family protein, expressed
LOC_Os09g27960	3 DAP-specific MEG		n.d.	n.d.	n.d.	n.d.	n.d.		n.d.	n.d.		transmembrane protein 50A, putative, expressed
LOC_Os09g28150	5 DAP-specific MEG		n.d.	n.d.	n.d.	n.d.	n.d.		n.d.	n.d.		bifunctional monodehydroascorbate reductase and carbonic anhydrasenectarin-3 precursor, putative, expressed
LOC_Os09g28940	Persistent PEG		PEG	PEG	PEG	n.d.	n.d.		PEG	PEG		ubiquitin carboxyl-terminal hydrolase domain containing protein, expressed
LOC_Os09g29050	3 DAP-specific PEG		n.d.	n.d.	n.d.	n.d.	n.d.		n.d.	n.d.		mitochondrial carrier protein, putative, expressed
LOC_Os09g32210	3 and 7 DAP overlapped MEG		n.d.	MEG	MEG	n.d.	MEG		MEG	n.d.		pumilio-family RNA binding repeat containing protein, expressed
LOC_Os09g32330	3 DAP-specific MEG		n.d.	n.d.	n.d.	n.d.	n.d.		n.d.	n.d.		expressed protein
LOC_Os09g32540	3 and 5 DAP overlapped PEG		n.d.	n.d.	n.d.	n.d.	n.d.		n.d.	n.d.		expressed protein
LOC_Os09g32750	Persistent PEG		n.d.	n.d.	n.d.	n.d.	n.d.		n.d.	n.d.		FHA domain containing protein, putative, expressed
LOC_Os09g34880	Persistent MEG		MEG	MEG	n.d.	n.d.	MEG		MEG	MEG		basic region leucine zipper domain containing protein, expressed
LOC_Os09g34950	Persistent PEG		n.d.	n.d.	n.d.	n.d.	n.d.		n.d.	n.d.		TCP family transcription factor, putative, expressed
LOC_Os09g34980	5 DAP-specific MEG		n.d.	n.d.	n.d.	n.d.	n.d.		n.d.	n.d.		zinc knuckle family protein, expressed
LOC_Os09g35600	3 and 5 DAP overlapped MEG		n.d.	n.d.	n.d.	n.d.	n.d.		n.d.	n.d.		MATE domain containing protein, expressed
LOC_Os09g35830	7 DAP-specific PEG		n.d.	n.d.	n.d.	n.d.	n.d.		n.d.	n.d.		RNA recognition motif containing protein, putative, expressed
LOC_Os09g35850	Persistent PEG		n.d.	n.d.	n.d.	n.d.	n.d.		n.d.	n.d.		RNA recognition motif containing protein, putative, expressed
LOC_Os09g36470	Persistent MEG		MEG	MEG	MEG	n.d.	MEG		MEG	MEG		retrotransposon protein, putative, unclassified, expressed
LOC_Os09g36970	Persistent MEG		n.d.	MEG	MEG	n.d.	MEG		n.d.	MEG		expressed protein
LOC_Os09g38268	3 DAP-specific PEG		n.d.	n.d.	n.d.	n.d.	n.d.		n.d.	n.d.		RNA polymerase IV largest subunit, putative, expressed
LOC_Os09g38429	n.d.		MEG	MEG	MEG	n.d.	n.d.		MEG	n.d.		hypothetical protein
LOC_Os10g01380	Persistent MEG		n.d.	n.d.	n.d.	n.d.	MEG		MEG	n.d.		CW7, putative, expressed
LOC_Os10g01480	Persistent PEG		n.d.	PEG	PEG	n.d.	PEG		PEG	PEG		Inositol 1, 3, 4-trisphosphate 5/6-kinase, putative, expressed
LOC_Os10g03870	Persistent MEG		n.d.	MEG	MEG	n.d.	MEG		n.d.	MEG		OsFBX353 - F-box domain containing protein, expressed
LOC_Os10g04600	7 DAP-specific PEG		n.d.	n.d.	n.d.	n.d.	n.d.		n.d.	n.d.		OsFBX359 - F-box domain containing protein, expressed
LOC_Os10g04610	7 DAP-specific PEG		n.d.	n.d.	n.d.	n.d.	n.d.		n.d.	n.d.		OsFBX360 - F-box domain containing protein, expressed
LOC_Os10g04860	3 DAP-specific PEG		n.d.	n.d.	n.d.	n.d.	n.d.		n.d.	n.d.		aldehyde oxidase, putative, expressed
LOC_Os10g04890	Persistent PEG		PEG	n.d.	PEG	n.d.	PEG		PEG	PEG		expressed protein
LOC_Os10g04900	5 and 7 DAP overlapped PEG		n.d.	PEG	PEG	n.d.	PEG		PEG	PEG		OsFBX364 - F-box domain containing protein, expressed
LOC_Os10g04980	Persistent PEG		PEG	PEG	PEG	n.d.	PEG		PEG	PEG		OsFBX365 - F-box domain containing protein, expressed
LOC_Os10g05500	Persistent PEG		n.d.	n.d.	PEG	n.d.	PEG		n.d.	PEG		OsFBX370 - F-box domain containing protein, expressed
LOC_Os10g05520	Persistent PEG		PEG	n.d.	PEG	n.d.	n.d.		PEG	PEG		OsFBX371 - F-box domain containing protein, expressed
LOC_Os10g05530	7 DAP-specific PEG		n.d.	n.d.	n.d.	n.d.	n.d.		n.d.	n.d.		OsFBX372 - F-box domain containing protein, expressed
LOC_Os10g05540	3 DAP-specific PEG		n.d.	n.d.	n.d.	n.d.	n.d.		n.d.	n.d.		OsFBX373 - F-box domain containing protein, expressed
LOC_Os10g05750	7 DAP-specific MEG		MEG	MEG	MEG	n.d.	MEG		n.d.	MEG		POEI3 - Pollen Ole e I allergen and extensin family protein precursor, expressed
LOC_Os10g05780	5 DAP-specific MEG		n.d.	n.d.	n.d.	n.d.	n.d.		n.d.	n.d.		POT domain containing peptide transporter, putative, expressed
LOC_Os10g05800	3 and 7 DAP overlapped PEG		n.d.	n.d.	n.d.	n.d.	n.d.		n.d.	n.d.		F-box protein family, AtFBL4, putative, expressed
LOC_Os10g05990	n.d.		n.d.	MEG	MEG	n.d.	n.d.		n.d.	MEG		POEI14 - Pollen Ole e I allergen and extensin family protein precursor, expressed
LOC_Os10g06000	7 DAP-specific MEG		n.d.	n.d.	MEG	n.d.	n.d.		n.d.	MEG		POEI15 - Pollen Ole e I allergen and extensin family protein precursor, expressed
LOC_Os10g08640	5 DAP-specific MEG		n.d.	n.d.	n.d.	n.d.	n.d.		n.d.	n.d.		expressed protein
LOC_Os10g11034	5 DAP-specific PEG		n.d.	n.d.	n.d.	n.d.	n.d.		n.d.	n.d.		caffeine-induced death protein 1, putative, expressed
LOC_Os10g11260	Persistent PEG		n.d.	n.d.	n.d.	n.d.	n.d.		n.d.	n.d.		ubiquitin-conjugating enzyme, putative, expressed
LOC_Os10g11580	Persistent MEG		n.d.	n.d.	n.d.	n.d.	n.d.		n.d.	n.d.		histone-like transcription factor and archaeal histone, putative, expressed
LOC_Os10g12760	5 DAP-specific MEG		n.d.	n.d.	n.d.	n.d.	n.d.		n.d.	n.d.		retrotransposon protein, putative, unclassified, expressed
LOC_Os10g13460	5 and 7 DAP overlapped MEG		n.d.	n.d.	n.d.	n.d.	MEG		n.d.	MEG		hypothetical protein
LOC_Os10g19860	3 DAP-specific PEG		n.d.	n.d.	n.d.	n.d.	n.d.		n.d.	n.d.		XI-I, putative, expressed
LOC_Os10g20530	n.d.		n.d.	n.d.	MEG	n.d.	n.d.		MEG	n.d.		expressed protein
LOC_Os10g20960	3 DAP-specific PEG		n.d.	n.d.	n.d.	n.d.	n.d.		n.d.	n.d.		retrotransposon protein, putative, unclassified, expressed
LOC_Os10g21418	7 DAP-specific MEG		n.d.	n.d.	n.d.	n.d.	n.d.		n.d.	n.d.		NADPH-dependent oxidoreductase, putative, expressed
LOC_Os10g21810	5 DAP-specific PEG		n.d.	n.d.	n.d.	n.d.	n.d.		n.d.	n.d.		histidine kinase, putative, expressed
LOC_Os10g22980	5 and 7 DAP overlapped MEG		n.d.	n.d.	n.d.	n.d.	n.d.		n.d.	n.d.		leucine rich repeat domain containing protein, putative, expressed
LOC_Os10g25180	3 DAP-specific MEG		n.d.	n.d.	n.d.	n.d.	n.d.		n.d.	n.d.		phosphoinositide phosphatase family protein, putative, expressed
LOC_Os10g26430	5 and 7 DAP overlapped MEG		n.d.	n.d.	n.d.	n.d.	n.d.		n.d.	n.d.		agenet domain containing protein, expressed
LOC_Os10g26520	3 and 7 DAP overlapped PEG		n.d.	n.d.	n.d.	n.d.	n.d.		n.d.	n.d.		protein kinase domain containing protein, expressed
LOC_Os10g27370	Persistent MEG		n.d.	n.d.	n.d.	n.d.	MEG		MEG	n.d.		transposon protein, putative, Pong sub-class, expressed
LOC_Os10g27380	3 DAP-specific MEG		n.d.	n.d.	n.d.	n.d.	n.d.		n.d.	n.d.		expressed protein
LOC_Os10g27390	5 DAP-specific MEG		n.d.	n.d.	n.d.	n.d.	n.d.		n.d.	n.d.		no apical meristem protein, putative, expressed
LOC_Os10g28360	7 DAP-specific PEG		n.d.	n.d.	n.d.	n.d.	n.d.		n.d.	n.d.		1,2-dihydroxy-3-keto-5-methylthiopentene dioxygenase protein, putative, expressed
LOC_Os10g29549	7 DAP-specific PEG		n.d.	n.d.	n.d.	n.d.	PEG		PEG	n.d.		expressed protein
LOC_Os10g29560	5 and 7 DAP overlapped MEG		n.d.	MEG	MEG	n.d.	MEG		MEG	n.d.		transposon protein, putative, CACTA, En/Spm sub-class, expressed
LOC_Os10g31330	3 DAP-specific MEG		n.d.	n.d.	n.d.	n.d.	n.d.		n.d.	n.d.		retrotransposon protein, putative, unclassified, expressed
LOC_Os10g31900	5 DAP-specific MEG		n.d.	n.d.	n.d.	n.d.	n.d.		n.d.	n.d.		RNA recognition motif containing protein, putative, expressed
LOC_Os10g32580	n.d.		n.d.	n.d.	MEG	n.d.	MEG		n.d.	MEG		GDSL-like lipase/acylhydrolase, putative, expressed
LOC_Os10g33670	3 DAP-specific MEG		n.d.	n.d.	n.d.	n.d.	n.d.		n.d.	n.d.		expressed protein
LOC_Os10g33930	3 and 7 DAP overlapped PEG		n.d.	n.d.	n.d.	n.d.	n.d.		n.d.	n.d.		DUF1336 domain containing protein, expressed
LOC_Os10g35220	Persistent PEG		n.d.	n.d.	PEG	n.d.	n.d.		PEG	n.d.		KH domain containing protein, putative, expressed
LOC_Os10g36710	Persistent PEG		n.d.	n.d.	PEG	n.d.	PEG		PEG	PEG		CAMK CAMK like.40 - CAMK includes calcium/calmodulin depedent protein kinases, expressed
LOC_Os10g36860	3 DAP-specific MEG		n.d.	n.d.	n.d.	n.d.	n.d.		n.d.	n.d.		CRS1/YhbY domain containing protein, expressed
LOC_Os10g37540	Persistent PEG		n.d.	PEG	PEG	n.d.	n.d.		n.d.	PEG		OsFBDUF48 - F-box and DUF domain containing protein, expressed
LOC_Os10g37830	5 and 7 DAP overlapped MEG		n.d.	n.d.	n.d.	n.d.	n.d.		n.d.	n.d.		OsFBX391 - F-box domain containing protein, expressed
LOC_Os10g39420	5 and 7 DAP overlapped MEG		MEG	MEG	MEG	n.d.	MEG		MEG	MEG		CAMK CAMK like.8 - CAMK includes calcium/calmodulin depedent protein kinases, expressed
LOC_Os10g39780	Persistent PEG		PEG	PEG	PEG	n.d.	PEG		PEG	PEG		protein phosphatase 2C, putative, expressed
LOC_Os10g40260	n.d.		n.d.	MEG	n.d.	n.d.	n.d.		MEG	n.d.		expressed protein
LOC_Os10g41360	n.d.		n.d.	n.d.	PEG	n.d.	PEG		PEG	PEG		ARABIDILLO-1, putative, expressed
LOC_Os10g41370	5 DAP-specific PEG		n.d.	n.d.	PEG	n.d.	PEG		PEG	n.d.		WD repeat-containing protein 8, putative, expressed
LOC_Os10g42690	Persistent PEG		n.d.	PEG	PEG	n.d.	PEG		n.d.	PEG		jmjC domain containing protein, expressed
LOC_Os11g03220	Persistent MEG		n.d.	n.d.	n.d.	n.d.	n.d.		n.d.	n.d.		RNA binding protein, putative, expressed
LOC_Os11g03900	3 DAP-specific PEG		n.d.	n.d.	n.d.	n.d.	n.d.		n.d.	n.d.		glucosamine--fructose-6-phosphate aminotransferase 1, putative, expressed
LOC_Os11g05010	Persistent PEG		n.d.	n.d.	n.d.	n.d.	n.d.		n.d.	n.d.		heavy-metal-associated domain-containing protein, putative, expressed
LOC_Os11g06070	3 DAP-specific PEG		n.d.	n.d.	n.d.	n.d.	n.d.		n.d.	n.d.		expressed protein
LOC_Os11g06580	Persistent PEG		n.d.	n.d.	n.d.	n.d.	n.d.		n.d.	n.d.		OsFBX397 - F-box domain containing protein, expressed
LOC_Os11g07910	Persistent PEG		PEG	PEG	PEG	n.d.	PEG		PEG	PEG		transmembrane 9 superfamily member, putative, expressed
LOC_Os11g08410	3 DAP-specific PEG		n.d.	n.d.	n.d.	n.d.	n.d.		n.d.	n.d.		GATA zinc finger domain containing protein, expressed
LOC_Os11g09160	7 DAP-specific PEG		n.d.	n.d.	n.d.	n.d.	n.d.		n.d.	n.d.		B3 DNA binding domain containing protein, expressed
LOC_Os11g09329	3 and 7 DAP overlapped PEG		n.d.	n.d.	n.d.	n.d.	n.d.		n.d.	n.d.		VHS and GAT domain containing protein, expressed
LOC_Os11g10060	3 DAP-specific PEG		n.d.	n.d.	n.d.	n.d.	n.d.		n.d.	n.d.		transcriptional corepressor SEUSS, putative, expressed
LOC_Os11g10070	3 DAP-specific PEG		n.d.	n.d.	n.d.	n.d.	n.d.		n.d.	n.d.		transcriptional corepressor SEUSS, putative, expressed
LOC_Os11g11180	3 DAP-specific MEG		n.d.	n.d.	n.d.	n.d.	n.d.		n.d.	MEG		expressed protein
LOC_Os11g11200	3 and 5 DAP overlapped MEG		n.d.	n.d.	n.d.	n.d.	n.d.		n.d.	MEG		expressed protein
LOC_Os11g13694	5 and 7 DAP overlapped PEG		n.d.	n.d.	n.d.	n.d.	n.d.		n.d.	n.d.		AGAP007117-PA, putative, expressed
LOC_Os11g13930	3 and 5 DAP overlapped MEG		n.d.	n.d.	n.d.	n.d.	n.d.		n.d.	n.d.		ZF-HD protein dimerisation region containing protein, expressed
LOC_Os11g14160	n.d.		n.d.	n.d.	n.d.	n.d.	MEG		n.d.	MEG		transposon protein, putative, Pong sub-class, expressed
LOC_Os11g14300	7 DAP-specific PEG		n.d.	n.d.	n.d.	n.d.	n.d.		n.d.	n.d.		la domain containing protein, expressed
LOC_Os11g15620	Persistent MEG		n.d.	MEG	MEG	n.d.	MEG		MEG	MEG		OsFBX420 - F-box domain containing protein, expressed
LOC_Os11g18170	3 DAP-specific PEG		n.d.	n.d.	n.d.	n.d.	n.d.		n.d.	n.d.		glutathione peroxidase, putative, expressed
LOC_Os11g23050	3 and 7 DAP overlapped MEG		n.d.	n.d.	n.d.	n.d.	n.d.		n.d.	n.d.		expressed protein
LOC_Os11g24120	3 DAP-specific MEG		n.d.	n.d.	n.d.	n.d.	n.d.		n.d.	n.d.		expressed protein
LOC_Os11g25470	7 DAP-specific MEG		n.d.	n.d.	n.d.	n.d.	n.d.		n.d.	n.d.		expressed protein
LOC_Os11g26020	5 DAP-specific MEG		n.d.	n.d.	n.d.	n.d.	n.d.		n.d.	n.d.		hypothetical protein
LOC_Os11g26030	5 DAP-specific MEG		n.d.	n.d.	n.d.	n.d.	n.d.		n.d.	n.d.		GTPase of unknown function domain containing protein, putative, expressed
LOC_Os11g26830	Persistent MEG		n.d.	n.d.	n.d.	n.d.	n.d.		n.d.	n.d.		ATP-binding region, ATPase-like domain containing protein, expressed
LOC_Os11g27470	Persistent MEG		MEG	MEG	MEG	n.d.	MEG		n.d.	MEG		expressed protein
LOC_Os11g28184	5 and 7 DAP overlapped MEG		n.d.	n.d.	n.d.	n.d.	n.d.		n.d.	n.d.		expressed protein
LOC_Os11g30220	3 DAP-specific MEG		n.d.	n.d.	n.d.	n.d.	n.d.		n.d.	n.d.		hypothetical protein
LOC_Os11g30790	7 DAP-specific PEG		n.d.	n.d.	n.d.	n.d.	n.d.		n.d.	n.d.		expressed protein
LOC_Os11g31330	Persistent PEG		n.d.	n.d.	PEG	n.d.	PEG		n.d.	PEG		no apical meristem protein, putative, expressed
LOC_Os11g31340	Persistent PEG		n.d.	n.d.	PEG	n.d.	PEG		n.d.	PEG		no apical meristem protein, putative, expressed
LOC_Os11g31360	Persistent PEG		n.d.	n.d.	PEG	n.d.	PEG		n.d.	PEG		no apical meristem protein, putative, expressed
LOC_Os11g31380	Persistent PEG		n.d.	n.d.	PEG	n.d.	PEG		n.d.	PEG		no apical meristem protein, putative, expressed
LOC_Os11g31500	5 DAP-specific PEG		n.d.	n.d.	n.d.	n.d.	n.d.		n.d.	n.d.		ATP binding protein, putative, expressed
LOC_Os11g31600	Persistent MEG		n.d.	n.d.	n.d.	n.d.	n.d.		n.d.	MEG		hypothetical protein
LOC_Os11g33100	3 DAP-specific MEG		n.d.	n.d.	n.d.	n.d.	n.d.		n.d.	n.d.		SNARE associated Golgi protein, putative, expressed
LOC_Os11g34190	Persistent PEG		n.d.	n.d.	n.d.	n.d.	PEG		PEG	n.d.		expressed protein
LOC_Os11g35400	n.d.		n.d.	n.d.	n.d.	n.d.	MEG		n.d.	MEG		AMP-binding enzyme, putative, expressed
LOC_Os11g36470	Persistent PEG		n.d.	n.d.	n.d.	n.d.	n.d.		n.d.	n.d.		ubiquitin carboxyl-terminal hydrolase 21, putative, expressed
LOC_Os11g36760	Persistent MEG		MEG	MEG	MEG	n.d.	MEG		n.d.	MEG		transmembrane receptor, putative, expressed
LOC_Os11g36770	Persistent MEG		n.d.	n.d.	n.d.	n.d.	n.d.		n.d.	MEG		expressed protein
LOC_Os11g37230	3 DAP-specific PEG		n.d.	n.d.	n.d.	n.d.	n.d.		PEG	n.d.		zinc finger, C3HC4 type domain containing protein, expressed
LOC_Os11g37520	Persistent PEG		n.d.	PEG	PEG	n.d.	PEG		PEG	n.d.		BTBT3 - Bric-a-Brac, Tramtrack, Broad Complex BTB domain with tetratricopeptide repeats, expressed
LOC_Os11g37890	Persistent PEG		n.d.	PEG	PEG	n.d.	n.d.		PEG	n.d.		NAD dependent epimerase/dehydratase family protein, putative, expressed
LOC_Os11g37950	3 DAP-specific MEG		n.d.	n.d.	n.d.	n.d.	n.d.		n.d.	n.d.		WIP3 - Wound-induced protein precursor, expressed
LOC_Os11g38630	5 DAP-specific MEG		n.d.	n.d.	n.d.	n.d.	n.d.		n.d.	n.d.		expressed protein
LOC_Os11g38900	Persistent PEG		n.d.	PEG	PEG	n.d.	PEG		PEG	PEG		histone-lysine N-methyltransferase, H3 lysine-9 specific SUVH1, putative, expressed
LOC_Os11g38980	Persistent PEG		n.d.	PEG	PEG	n.d.	PEG		PEG	PEG		F-box/Kelch-repeat protein, putative, expressed
LOC_Os11g39330	5 DAP-specific MEG		n.d.	n.d.	n.d.	n.d.	n.d.		n.d.	n.d.		NB-ARC domain containing protein, putative, expressed
LOC_Os11g40530	5 and 7 DAP overlapped MEG		n.d.	n.d.	MEG	n.d.	MEG		n.d.	MEG		LTPL162 - Protease inhibitor/seed storage/LTP family protein precursor, expressed
LOC_Os11g41890	5 and 7 DAP overlapped MEG		MEG	MEG	MEG	n.d.	MEG		MEG	n.d.		RNA recognition motif containing protein, putative, expressed
LOC_Os11g45590	5 and 7 DAP overlapped PEG		n.d.	n.d.	n.d.	n.d.	n.d.		n.d.	n.d.		transposon protein, putative, CACTA, En/Spm sub-class, expressed
LOC_Os12g02130	3 DAP-specific PEG		n.d.	n.d.	n.d.	n.d.	n.d.		n.d.	n.d.		expressed protein
LOC_Os12g02280	3 DAP-specific PEG		n.d.	n.d.	n.d.	n.d.	n.d.		n.d.	n.d.		pentatricopeptide, putative, expressed
LOC_Os12g02440	Persistent PEG		n.d.	PEG	PEG	n.d.	n.d.		n.d.	PEG		WRKY95, expressed
LOC_Os12g02690	3 DAP-specific MEG		n.d.	n.d.	n.d.	n.d.	n.d.		n.d.	n.d.		expressed protein
LOC_Os12g02970	Persistent MEG		n.d.	n.d.	n.d.	n.d.	n.d.		n.d.	n.d.		RNA binding protein, putative, expressed
LOC_Os12g03250	Persistent MEG		n.d.	n.d.	n.d.	n.d.	n.d.		n.d.	n.d.		retrotransposon protein, putative, unclassified, expressed
LOC_Os12g05040	Persistent PEG		PEG	n.d.	PEG	n.d.	PEG		PEG	PEG		heavy-metal-associated domain-containing protein, putative, expressed
LOC_Os12g05700	3 and 7 DAP overlapped MEG		n.d.	n.d.	n.d.	n.d.	n.d.		n.d.	n.d.		transposon protein, putative, Mutator sub-class, expressed
LOC_Os12g06180	Persistent PEG		n.d.	n.d.	n.d.	n.d.	n.d.		n.d.	n.d.		HVA22, putative, expressed
LOC_Os12g06190	5 DAP-specific PEG		n.d.	n.d.	n.d.	n.d.	n.d.		n.d.	n.d.		expressed protein
LOC_Os12g06480	Persistent MEG		n.d.	MEG	MEG	n.d.	MEG		MEG	MEG		PHD-finger family protein, expressed
LOC_Os12g06630	3 and 5 DAP overlapped PEG		n.d.	n.d.	n.d.	n.d.	n.d.		n.d.	n.d.		OsFBT14 - F-box and tubby domain containing protein, expressed
LOC_Os12g06950	7 DAP-specific MEG		n.d.	n.d.	n.d.	n.d.	n.d.		n.d.	n.d.		hypothetical protein
LOC_Os12g07120	Persistent PEG		n.d.	n.d.	n.d.	n.d.	n.d.		n.d.	n.d.		GATA zinc finger domain containing protein, expressed
LOC_Os12g08780	Persistent PEG		PEG	PEG	PEG	n.d.	PEG		PEG	n.d.		flavin monooxygenase, putative, expressed
LOC_Os12g08810	3 DAP-specific PEG		n.d.	n.d.	n.d.	n.d.	n.d.		PEG	n.d.		VTC2, putative, expressed
LOC_Os12g10540	3 DAP-specific MEG		n.d.	MEG	n.d.	n.d.	MEG		n.d.	MEG		OsMADS13 - MADS-box family gene with MIKCc type-box, expressed
LOC_Os12g10800	7 DAP-specific MEG		n.d.	n.d.	n.d.	n.d.	MEG		n.d.	MEG		transposon protein, putative, unclassified, expressed
LOC_Os12g13390	3 DAP-specific MEG		n.d.	n.d.	n.d.	n.d.	n.d.		n.d.	n.d.		aspartyl aminopeptidase, putative, expressed
LOC_Os12g13450	3 and 5 DAP overlapped MEG		n.d.	n.d.	n.d.	n.d.	MEG		n.d.	MEG		retrotransposon protein, putative, unclassified, expressed
LOC_Os12g13670	7 DAP-specific MEG		n.d.	MEG	MEG	n.d.	MEG		MEG	n.d.		expressed protein
LOC_Os12g15980	3 and 7 DAP overlapped MEG		n.d.	n.d.	n.d.	n.d.	n.d.		n.d.	n.d.		expressed protein
LOC_Os12g16600	Persistent MEG		n.d.	MEG	n.d.	n.d.	n.d.		MEG	MEG		expressed protein
LOC_Os12g17430	n.d.		n.d.	MEG	n.d.	n.d.	MEG		MEG	n.d.		NBS-LRR disease resistance protein, putative, expressed
LOC_Os12g17670	Persistent MEG		n.d.	MEG	MEG	n.d.	MEG		MEG	MEG		expressed protein
LOC_Os12g17710	Persistent MEG		n.d.	MEG	MEG	n.d.	MEG		MEG	MEG		expressed protein
LOC_Os12g18810	3 and 7 DAP overlapped PEG		n.d.	n.d.	n.d.	n.d.	n.d.		n.d.	n.d.		expressed protein
LOC_Os12g18860	3 DAP-specific PEG		n.d.	n.d.	PEG	n.d.	n.d.		PEG	n.d.		OsPOP23 - Putative Prolyl Oligopeptidase homologue, expressed
LOC_Os12g19290	Persistent PEG		n.d.	n.d.	n.d.	n.d.	n.d.		n.d.	n.d.		AGC AGC other NDRh TRCd.4 - ACG kinases include homologs to PKA, PKG and PKC, expressed
LOC_Os12g19381	n.d.		n.d.	MEG	n.d.	n.d.	n.d.		n.d.	MEG		ribulose bisphosphate carboxylase small chain, chloroplast precursor, putative, expressed
LOC_Os12g19470	n.d.		n.d.	n.d.	n.d.	n.d.	n.d.		n.d.	MEG		ribulose bisphosphate carboxylase small chain, chloroplast precursor, putative, expressed
LOC_Os12g22650	3 and 5 DAP overlapped MEG		n.d.	n.d.	n.d.	n.d.	n.d.		n.d.	n.d.		histone H3, putative, expressed
LOC_Os12g22680	Persistent MEG		n.d.	MEG	MEG	n.d.	MEG		MEG	MEG		histone H3, putative, expressed
LOC_Os12g23040	Persistent MEG		n.d.	n.d.	n.d.	n.d.	MEG		MEG	n.d.		transposon protein, putative, Mutator sub-class, expressed
LOC_Os12g23520	3 DAP-specific MEG		n.d.	n.d.	n.d.	n.d.	n.d.		n.d.	n.d.		retrotransposon protein, putative, Ty3-gypsy subclass, expressed
LOC_Os12g27120	3 DAP-specific MEG		n.d.	n.d.	n.d.	n.d.	n.d.		n.d.	n.d.		retrotransposon protein, putative, unclassified, expressed
LOC_Os12g27994	Persistent MEG		MEG	MEG	MEG	n.d.	MEG		MEG	MEG		expressed protein
LOC_Os12g31350	Persistent PEG		PEG	PEG	PEG	n.d.	PEG		PEG	PEG		SSXT protein, putative, expressed
LOC_Os12g32050	3 DAP-specific PEG		n.d.	n.d.	n.d.	n.d.	n.d.		n.d.	n.d.		expressed protein
LOC_Os12g32060	Persistent PEG		n.d.	n.d.	n.d.	n.d.	n.d.		n.d.	n.d.		expressed protein
LOC_Os12g32080	Persistent PEG		n.d.	PEG	PEG	n.d.	n.d.		n.d.	PEG		expressed protein
LOC_Os12g32150	Persistent PEG		PEG	PEG	PEG	n.d.	PEG		PEG	PEG		expressed protein
LOC_Os12g32170	Persistent PEG		PEG	n.d.	n.d.	n.d.	PEG		n.d.	PEG		expressed protein
LOC_Os12g32180	Persistent PEG		n.d.	PEG	PEG	n.d.	PEG		PEG	PEG		cornichon protein, putative, expressed
LOC_Os12g32250	Persistent PEG		n.d.	n.d.	n.d.	n.d.	n.d.		n.d.	n.d.		WRKY96, expressed
LOC_Os12g32630	7 DAP-specific PEG		n.d.	n.d.	n.d.	n.d.	n.d.		n.d.	n.d.		OsFBX448 - F-box domain containing protein, expressed
LOC_Os12g34022	Persistent MEG		n.d.	n.d.	n.d.	n.d.	n.d.		n.d.	MEG		retrotransposon protein, putative, unclassified, expressed
LOC_Os12g34490	3 and 5 DAP overlapped MEG		n.d.	n.d.	n.d.	n.d.	n.d.		n.d.	n.d.		expressed protein
LOC_Os12g36180	7 DAP-specific PEG		n.d.	n.d.	n.d.	n.d.	n.d.		n.d.	n.d.		auxilin, putative, expressed
LOC_Os12g36720	7 DAP-specific PEG		n.d.	n.d.	n.d.	n.d.	n.d.		n.d.	n.d.		RGH1A, putative, expressed
LOC_Os12g36950	Persistent PEG		n.d.	n.d.	n.d.	n.d.	n.d.		n.d.	n.d.		CTP synthase, putative, expressed
LOC_Os12g37860	Persistent PEG		PEG	n.d.	PEG	n.d.	PEG		PEG	PEG		expressed protein
LOC_Os12g38580	3 and 5 DAP overlapped PEG		n.d.	n.d.	n.d.	n.d.	n.d.		n.d.	n.d.		hypothetical protein
LOC_Os12g38590	Persistent PEG		n.d.	MEG	MEG	n.d.	PEG		MEG	n.d.		pumilio-family RNA binding repeat containing protein, expressed
LOC_Os12g38590	Persistent PEG		n.d.	MEG	MEG	n.d.	PEG		MEG	n.d.		pumilio-family RNA binding repeat containing protein, expressed
LOC_Os12g39420	Persistent PEG		n.d.	n.d.	PEG	n.d.	PEG		n.d.	PEG		nucleobase-ascorbate transporter, putative, expressed
LOC_Os12g39660	3 DAP-specific PEG		n.d.	n.d.	n.d.	n.d.	n.d.		n.d.	n.d.		calcium-transporting ATPase, plasma membrane-type, putative, expressed
LOC_Os12g39890	3 DAP-specific MEG		n.d.	n.d.	n.d.	n.d.	n.d.		n.d.	n.d.		expressed protein
LOC_Os12g40190	Persistent PEG		n.d.	n.d.	n.d.	n.d.	n.d.		n.d.	n.d.		G-protein alpha subunit, putative, expressed
LOC_Os12g40510	Persistent PEG		n.d.	n.d.	n.d.	n.d.	n.d.		n.d.	n.d.		calcineurin B, putative, expressed
LOC_Os12g40520	Persistent PEG		PEG	PEG	PEG	n.d.	PEG		PEG	PEG		MATH domain containing protein, expressed
LOC_Os12g40790	Persistent MEG		n.d.	n.d.	n.d.	n.d.	n.d.		n.d.	n.d.		zinc finger family protein, putative, expressed
LOC_Os12g41140	5 and 7 DAP overlapped MEG		n.d.	n.d.	MEG	n.d.	MEG		MEG	MEG		expressed protein
LOC_Os12g41710	3 DAP-specific MEG		n.d.	n.d.	n.d.	n.d.	n.d.		n.d.	n.d.		Protein kinase domain containing protein, expressed
LOC_Os12g41956	3 and 5 DAP overlapped PEG		n.d.	n.d.	n.d.	n.d.	n.d.		n.d.	n.d.		galactosyltransferase family protein, putative, expressed
LOC_Os12g42300	7 DAP-specific PEG		n.d.	n.d.	n.d.	n.d.	n.d.		n.d.	n.d.		potasium efflux antiporter protein, putative, expressed
LOC_Os12g42310	Persistent PEG		n.d.	PEG	PEG	n.d.	PEG		PEG	PEG		serine/threonine-protein phosphatase BSL2, putative, expressed
LOC_Os12g42610	n.d.		n.d.	n.d.	n.d.	n.d.	MEG		n.d.	MEG		YABBY domain containing protein, putative, expressed

## Sheet: Reported PEGs
Supplementary Data 4. Comparative list of the reported imprinted genes.
locus_name	Our data sets			Reported imprinted genes					Re-analysis
	Class of imprinted genes	SeedCoat		Luo et al. 2011	Yuan et al. 2017	Cheng et al. 2018	Rodrigues et al. 2021		Yuan et al. 2017	Rodrigues et al. 2021
LOC_Os01g16810	Persistent PEG	Yes		n.d.	PEG	PEG	PEG		n.d.	PEG
LOC_Os01g16810	n.d.	Yes		n.d.	PEG	PEG	PEG		n.d.	PEG
LOC_Os02g51860	Persistent PEG	Yes		PEG	PEG	PEG	n.d.		n.d.	n.d.
LOC_Os01g03144	n.d.	No		n.d.	n.d.	PEG	n.d.		n.d.	n.d.
LOC_Os01g05510	5 or 7 DAP-specific PEGs	No		n.d.	n.d.	n.d.	n.d.		n.d.	n.d.
LOC_Os01g11130	Persistent PEG	Yes		n.d.	n.d.	PEG	PEG		PEG	PEG
LOC_Os01g07740	n.d.	No		n.d.	n.d.	PEG	PEG		PEG	PEG
LOC_Os01g07920	Persistent PEG	Yes		n.d.	MEG	n.d.	PEG		MEG	n.d.
LOC_Os01g07920	n.d.	Yes		n.d.	MEG	n.d.	PEG		MEG	n.d.
LOC_Os01g07920	n.d.	Yes		n.d.	MEG	n.d.	PEG		MEG	n.d.
LOC_Os05g41220	5 or 7 DAP-specific PEGs	Yes		PEG	PEG	PEG	PEG		PEG	PEG
LOC_Os01g07930	n.d.	No		n.d.	n.d.	PEG	PEG		n.d.	PEG
LOC_Os02g51860	n.d.	Yes		PEG	PEG	PEG	n.d.		n.d.	n.d.
LOC_Os01g17250	5 or 7 DAP-specific PEGs	Yes		n.d.	n.d.	PEG	PEG		PEG	n.d.
LOC_Os03g60150	Persistent PEG	Yes		n.d.	PEG	PEG	PEG		PEG	n.d.
LOC_Os01g11130	n.d.	Yes		n.d.	n.d.	PEG	PEG		PEG	PEG
LOC_Os02g17190	5 or 7 DAP-specific PEGs	Yes		PEG	n.d.	PEG	n.d.		n.d.	n.d.
LOC_Os01g13360	n.d.	No		n.d.	n.d.	PEG	PEG		n.d.	n.d.
LOC_Os01g56100	Persistent PEG	Yes		n.d.	n.d.	PEG	PEG		n.d.	PEG
LOC_Os01g13404	n.d.	No		n.d.	n.d.	PEG	n.d.		n.d.	n.d.
LOC_Os05g01240	5 or 7 DAP-specific PEGs	Yes		n.d.	PEG	PEG	PEG		PEG	n.d.
LOC_Os01g13460	n.d.	No		n.d.	n.d.	PEG	PEG		n.d.	PEG
LOC_Os01g16110	n.d.	No		n.d.	n.d.	n.d.	PEG		n.d.	n.d.
LOC_Os01g16240	n.d.	No		n.d.	n.d.	PEG	n.d.		PEG	n.d.
LOC_Os05g41220	n.d.	Yes		PEG	PEG	PEG	PEG		PEG	PEG
LOC_Os07g42770	Persistent PEG	Yes		n.d.	PEG	PEG	n.d.		PEG	n.d.
LOC_Os01g17060	3 DAP-specific PEGs	No		n.d.	n.d.	n.d.	n.d.		n.d.	n.d.
LOC_Os03g11550	7 DAP-specific PEGs	Yes		PEG	n.d.	PEG	n.d.		n.d.	n.d.
LOC_Os01g17250	n.d.	Yes		n.d.	n.d.	PEG	PEG		PEG	n.d.
LOC_Os03g38970	Persistent PEG	Yes		PEG	n.d.	PEG	PEG		n.d.	PEG
LOC_Os01g17990	n.d.	No		n.d.	n.d.	PEG	PEG		PEG	PEG
LOC_Os01g23620	7 DAP-specific PEGs	No		n.d.	n.d.	n.d.	n.d.		n.d.	n.d.
LOC_Os10g42690	Persistent PEG	Yes		n.d.	PEG	PEG	PEG		n.d.	PEG
LOC_Os01g27750	n.d.	No		n.d.	n.d.	PEG	PEG		PEG	PEG
LOC_Os01g28230	3 DAP-specific PEGs	No		n.d.	n.d.	n.d.	n.d.		n.d.	n.d.
LOC_Os01g31629	3 DAP-specific PEGs	No		n.d.	n.d.	PEG	n.d.		n.d.	n.d.
LOC_Os01g31629	n.d.	No		n.d.	n.d.	PEG	n.d.		n.d.	n.d.
LOC_Os01g32890	3 DAP-specific PEGs	No		n.d.	n.d.	n.d.	n.d.		n.d.	n.d.
LOC_Os01g32980	Persistent PEG	No		n.d.	n.d.	n.d.	n.d.		n.d.	n.d.
LOC_Os01g69850	Persistent PEG	Yes		n.d.	n.d.	PEG	PEG		n.d.	n.d.
LOC_Os01g33650	n.d.	No		n.d.	n.d.	PEG	PEG		PEG	n.d.
LOC_Os01g34880	7 DAP-specific PEGs	Yes		n.d.	n.d.	n.d.	n.d.		n.d.	n.d.
LOC_Os01g34890	3 or 7 DAP-specific PEGs	Yes		n.d.	n.d.	n.d.	PEG		n.d.	n.d.
LOC_Os01g34890	n.d.	Yes		n.d.	n.d.	n.d.	PEG		n.d.	n.d.
LOC_Os01g36840	Persistent PEG	No		n.d.	n.d.	n.d.	n.d.		n.d.	n.d.
LOC_Os01g40590	Persistent PEG	No		n.d.	n.d.	n.d.	PEG		PEG	n.d.
LOC_Os01g40590	n.d.	No		n.d.	n.d.	n.d.	PEG		PEG	n.d.
LOC_Os01g41310	3 DAP-specific PEGs	No		n.d.	n.d.	PEG	n.d.		n.d.	n.d.
LOC_Os01g41310	n.d.	No		n.d.	n.d.	PEG	n.d.		n.d.	n.d.
LOC_Os02g09650	5 or 7 DAP-specific PEGs	Yes		n.d.	n.d.	PEG	PEG		n.d.	PEG
LOC_Os01g41370	n.d.	No		n.d.	n.d.	PEG	PEG		PEG	PEG
LOC_Os01g41630	5 or 7 DAP-specific PEGs	No		n.d.	n.d.	n.d.	n.d.		PEG	n.d.
LOC_Os01g41630	n.d.	No		n.d.	n.d.	n.d.	n.d.		PEG	n.d.
LOC_Os01g42260	3 DAP-specific PEGs	No		n.d.	n.d.	n.d.	n.d.		n.d.	n.d.
LOC_Os01g42970	3 DAP-specific PEGs	No		n.d.	n.d.	n.d.	n.d.		n.d.	n.d.
LOC_Os03g60150	n.d.	Yes		n.d.	PEG	PEG	PEG		PEG	n.d.
LOC_Os02g21460	Persistent PEG	Yes		n.d.	n.d.	PEG	PEG		n.d.	n.d.
LOC_Os02g36360	Persistent PEG	Yes		n.d.	n.d.	PEG	PEG		n.d.	PEG
LOC_Os01g54100	n.d.	No		n.d.	n.d.	PEG	PEG		n.d.	n.d.
LOC_Os03g43590	5 or 7 DAP-specific PEGs	Yes		n.d.	n.d.	PEG	PEG		n.d.	n.d.
LOC_Os02g17190	n.d.	Yes		PEG	n.d.	PEG	n.d.		n.d.	n.d.
LOC_Os03g55630	7 DAP-specific PEGs	Yes		n.d.	n.d.	PEG	n.d.		n.d.	n.d.
LOC_Os01g55450	n.d.	No		n.d.	n.d.	PEG	PEG		n.d.	PEG
LOC_Os01g55720	3 DAP-specific PEGs	No		n.d.	n.d.	n.d.	n.d.		n.d.	n.d.
LOC_Os05g05800	Persistent PEG	Yes		n.d.	n.d.	PEG	n.d.		n.d.	n.d.
LOC_Os01g56100	n.d.	Yes		n.d.	n.d.	PEG	PEG		n.d.	PEG
LOC_Os04g31790	n.d.	Yes		n.d.	PEG	PEG	n.d.		n.d.	n.d.
LOC_Os04g31804	n.d.	Yes		n.d.	PEG	PEG	n.d.		PEG	n.d.
LOC_Os05g01240	n.d.	Yes		n.d.	PEG	PEG	PEG		PEG	n.d.
LOC_Os06g11190	7 DAP-specific PEGs	Yes		n.d.	n.d.	PEG	n.d.		n.d.	n.d.
LOC_Os01g56820	Persistent PEG	No		n.d.	n.d.	n.d.	n.d.		n.d.	n.d.
LOC_Os01g61020	3 DAP-specific PEGs	No		n.d.	n.d.	n.d.	n.d.		n.d.	n.d.
LOC_Os01g61420	3 DAP-specific PEGs	Yes		n.d.	n.d.	n.d.	n.d.		n.d.	n.d.
LOC_Os07g42770	n.d.	Yes		n.d.	PEG	PEG	n.d.		PEG	n.d.
LOC_Os06g47294	5 or 7 DAP-specific PEGs	Yes		n.d.	n.d.	PEG	n.d.		n.d.	n.d.
LOC_Os01g62460	Persistent PEG	No		n.d.	n.d.	n.d.	PEG		n.d.	n.d.
LOC_Os01g62460	n.d.	No		n.d.	n.d.	n.d.	PEG		n.d.	n.d.
LOC_Os01g62780	n.d.	No		n.d.	n.d.	n.d.	PEG		n.d.	n.d.
LOC_Os01g62790	5 or 7 DAP-specific PEGs	No		n.d.	n.d.	n.d.	n.d.		n.d.	n.d.
LOC_Os03g11550	n.d.	Yes		PEG	n.d.	PEG	n.d.		n.d.	n.d.
LOC_Os08g35050	Persistent PEG	Yes		n.d.	n.d.	PEG	PEG		n.d.	PEG
LOC_Os03g38970	n.d.	Yes		PEG	n.d.	PEG	PEG		n.d.	PEG
LOC_Os09g16520	Persistent PEG	Yes		n.d.	n.d.	PEG	n.d.		n.d.	n.d.
LOC_Os01g65986	Persistent PEG	No		n.d.	n.d.	n.d.	PEG		n.d.	n.d.
LOC_Os01g65986	n.d.	No		n.d.	n.d.	n.d.	PEG		n.d.	n.d.
LOC_Os01g66070	3 DAP-specific PEGs	No		n.d.	n.d.	n.d.	n.d.		n.d.	n.d.
LOC_Os01g66300	3 or 5 DAP-specific PEGs	No		n.d.	n.d.	n.d.	n.d.		n.d.	n.d.
LOC_Os08g01040	n.d.	Yes		n.d.	PEG	n.d.	PEG		n.d.	PEG
LOC_Os08g01040	5 or 7 DAP-specific PEGs	Yes		n.d.	PEG	n.d.	PEG		n.d.	PEG
LOC_Os11g31330	Persistent PEG	Yes		n.d.	n.d.	PEG	PEG		n.d.	PEG
LOC_Os01g67870	n.d.	No		n.d.	n.d.	PEG	PEG		n.d.	n.d.
LOC_Os10g42690	n.d.	Yes		n.d.	PEG	PEG	PEG		n.d.	PEG
LOC_Os01g03144	Persistent PEG	No		n.d.	n.d.	PEG	n.d.		n.d.	n.d.
LOC_Os10g33940	n.d.	Yes		PEG	n.d.	n.d.	n.d.		n.d.	n.d.
LOC_Os01g07740	5 or 7 DAP-specific PEGs	No		n.d.	n.d.	PEG	PEG		PEG	PEG
LOC_Os01g07930	Persistent PEG	No		n.d.	n.d.	PEG	PEG		n.d.	PEG
LOC_Os01g69850	n.d.	Yes		n.d.	n.d.	PEG	PEG		n.d.	n.d.
LOC_Os01g13360	5 or 7 DAP-specific PEGs	No		n.d.	n.d.	PEG	PEG		n.d.	n.d.
LOC_Os01g69910	n.d.	No		n.d.	n.d.	PEG	n.d.		n.d.	n.d.
LOC_Os01g69920	3 DAP-specific PEGs	Yes		n.d.	n.d.	PEG	n.d.		n.d.	n.d.
LOC_Os01g69920	n.d.	Yes		n.d.	n.d.	PEG	n.d.		n.d.	n.d.
LOC_Os01g13404	Persistent PEG	No		n.d.	n.d.	PEG	n.d.		n.d.	n.d.
LOC_Os01g69930	n.d.	No		n.d.	n.d.	PEG	n.d.		n.d.	n.d.
LOC_Os01g13460	5 or 7 DAP-specific PEGs	No		n.d.	n.d.	PEG	PEG		n.d.	PEG
LOC_Os01g69940	n.d.	No		n.d.	n.d.	PEG	n.d.		n.d.	PEG
LOC_Os01g54784	n.d.	No		PEG	n.d.	PEG	PEG		n.d.	PEG
LOC_Os01g17990	Persistent PEG	No		n.d.	n.d.	PEG	PEG		PEG	PEG
LOC_Os01g73450	n.d.	No		n.d.	n.d.	PEG	n.d.		n.d.	n.d.
LOC_Os01g73460	n.d.	Yes		n.d.	n.d.	PEG	PEG		n.d.	n.d.
LOC_Os02g01490	3 DAP-specific PEGs	No		n.d.	n.d.	n.d.	n.d.		n.d.	n.d.
LOC_Os02g03600	3 or 7 DAP-specific PEGs	No		n.d.	n.d.	n.d.	n.d.		n.d.	n.d.
LOC_Os02g03700	3 DAP-specific PEGs	No		n.d.	n.d.	n.d.	n.d.		n.d.	n.d.
LOC_Os02g04450	Persistent PEG	No		n.d.	n.d.	n.d.	n.d.		n.d.	n.d.
LOC_Os02g05520	3 DAP-specific PEGs	No		n.d.	n.d.	n.d.	n.d.		n.d.	n.d.
LOC_Os01g27750	Persistent PEG	No		n.d.	n.d.	PEG	PEG		PEG	PEG
LOC_Os01g02050	n.d.	No		n.d.	PEG	PEG	n.d.		PEG	PEG
LOC_Os02g06390	3 DAP-specific PEGs	No		n.d.	n.d.	n.d.	n.d.		n.d.	n.d.
LOC_Os02g06890	Persistent PEG	No		n.d.	n.d.	n.d.	n.d.		n.d.	n.d.
LOC_Os02g07450	5 or 7 DAP-specific PEGs	No		n.d.	n.d.	n.d.	n.d.		n.d.	n.d.
LOC_Os01g33650	Persistent PEG	No		n.d.	n.d.	PEG	PEG		PEG	n.d.
LOC_Os01g08570	n.d.	No		n.d.	PEG	PEG	PEG		PEG	PEG
LOC_Os02g07800	7 DAP-specific PEGs	Yes		n.d.	n.d.	n.d.	n.d.		PEG	n.d.
LOC_Os02g07800	n.d.	Yes		n.d.	n.d.	n.d.	n.d.		PEG	n.d.
LOC_Os01g41370	Persistent PEG	No		n.d.	n.d.	PEG	PEG		PEG	PEG
LOC_Os02g08300	n.d.	No		n.d.	n.d.	PEG	PEG		n.d.	PEG
LOC_Os02g09630	5 DAP-specific PEGs	Yes		n.d.	n.d.	n.d.	n.d.		n.d.	n.d.
LOC_Os01g54100	Persistent PEG	No		n.d.	n.d.	PEG	PEG		n.d.	n.d.
LOC_Os02g09650	n.d.	Yes		n.d.	n.d.	PEG	PEG		n.d.	PEG
LOC_Os02g09770	Persistent PEG	No		n.d.	n.d.	n.d.	PEG		n.d.	n.d.
LOC_Os02g09770	n.d.	No		n.d.	n.d.	n.d.	PEG		n.d.	n.d.
LOC_Os02g10100	3 or 5 DAP-specific PEGs	No		n.d.	n.d.	n.d.	n.d.		n.d.	n.d.
LOC_Os01g55450	Persistent PEG	No		n.d.	n.d.	PEG	PEG		n.d.	PEG
LOC_Os02g10650	n.d.	No		n.d.	n.d.	PEG	PEG		PEG	PEG
LOC_Os01g67870	5 or 7 DAP-specific PEGs	No		n.d.	n.d.	PEG	PEG		n.d.	n.d.
LOC_Os01g56110	n.d.	No		PEG	n.d.	PEG	PEG		n.d.	PEG
LOC_Os01g54784	Persistent PEG	No		PEG	n.d.	PEG	PEG		n.d.	PEG
LOC_Os02g12870	n.d.	No		n.d.	n.d.	PEG	PEG		n.d.	n.d.
LOC_Os02g14600	3 DAP-specific PEGs	No		n.d.	n.d.	n.d.	n.d.		n.d.	n.d.
LOC_Os01g69910	7 DAP-specific PEGs	No		n.d.	n.d.	PEG	n.d.		n.d.	n.d.
LOC_Os01g51754	n.d.	No		n.d.	PEG	PEG	n.d.		PEG	n.d.
LOC_Os02g17210	n.d.	No		n.d.	n.d.	PEG	n.d.		n.d.	n.d.
LOC_Os01g69930	Persistent PEG	No		n.d.	n.d.	PEG	n.d.		n.d.	n.d.
LOC_Os01g56580	n.d.	No		n.d.	PEG	PEG	PEG		PEG	PEG
LOC_Os02g19220	3 DAP-specific PEGs	No		n.d.	n.d.	n.d.	PEG		n.d.	n.d.
LOC_Os02g19220	n.d.	No		n.d.	n.d.	n.d.	PEG		n.d.	n.d.
LOC_Os02g20394	3 or 7 DAP-specific PEGs	No		n.d.	n.d.	n.d.	n.d.		n.d.	n.d.
LOC_Os01g69940	Persistent PEG	No		n.d.	n.d.	PEG	n.d.		n.d.	PEG
LOC_Os01g65850	n.d.	No		PEG	n.d.	PEG	n.d.		PEG	PEG
LOC_Os01g73450	Persistent PEG	No		n.d.	n.d.	PEG	n.d.		n.d.	n.d.
LOC_Os02g21460	n.d.	Yes		n.d.	n.d.	PEG	PEG		n.d.	n.d.
LOC_Os02g29040	7 DAP-specific PEGs	No		n.d.	n.d.	n.d.	n.d.		n.d.	n.d.
LOC_Os01g02050	Persistent PEG	No		n.d.	PEG	PEG	n.d.		PEG	PEG
LOC_Os02g29110	n.d.	No		n.d.	n.d.	PEG	n.d.		n.d.	n.d.
LOC_Os02g29130	3 or 7 DAP-specific PEGs	No		n.d.	n.d.	n.d.	n.d.		n.d.	PEG
LOC_Os02g29130	n.d.	No		n.d.	n.d.	n.d.	n.d.		n.d.	PEG
LOC_Os01g08570	Persistent PEG	No		n.d.	PEG	PEG	PEG		PEG	PEG
LOC_Os01g68820	n.d.	No		PEG	n.d.	PEG	PEG		n.d.	PEG
LOC_Os01g69040	3 DAP-specific PEGs	No		PEG	n.d.	PEG	PEG		n.d.	PEG
LOC_Os01g69040	n.d.	No		PEG	n.d.	PEG	PEG		n.d.	PEG
LOC_Os02g08300	Persistent PEG	No		n.d.	n.d.	PEG	PEG		n.d.	PEG
LOC_Os02g34360	n.d.	No		n.d.	n.d.	PEG	PEG		n.d.	n.d.
LOC_Os02g10650	Persistent PEG	No		n.d.	n.d.	PEG	PEG		PEG	PEG
LOC_Os02g34370	n.d.	No		n.d.	n.d.	PEG	PEG		n.d.	n.d.
LOC_Os01g56110	Persistent PEG	No		PEG	n.d.	PEG	PEG		n.d.	PEG
LOC_Os02g34500	n.d.	No		n.d.	n.d.	PEG	PEG		n.d.	n.d.
LOC_Os02g34850	5 or 7 DAP-specific PEGs	No		n.d.	n.d.	n.d.	PEG		n.d.	n.d.
LOC_Os02g34850	n.d.	No		n.d.	n.d.	n.d.	PEG		n.d.	n.d.
LOC_Os02g35010	3 or 5 DAP-specific PEGs	No		n.d.	n.d.	n.d.	PEG		n.d.	n.d.
LOC_Os02g35010	n.d.	No		n.d.	n.d.	n.d.	PEG		n.d.	n.d.
LOC_Os02g35130	7 DAP-specific PEGs	No		n.d.	n.d.	n.d.	n.d.		n.d.	n.d.
LOC_Os02g12870	Persistent PEG	No		n.d.	n.d.	PEG	PEG		n.d.	n.d.
LOC_Os02g12840	Persistent PEG	No		PEG	n.d.	n.d.	n.d.		n.d.	n.d.
LOC_Os01g51754	5 or 7 DAP-specific PEGs	No		n.d.	PEG	PEG	n.d.		PEG	n.d.
LOC_Os02g36360	n.d.	Yes		n.d.	n.d.	PEG	PEG		n.d.	PEG
LOC_Os02g36670	n.d.	No		n.d.	n.d.	n.d.	PEG		n.d.	n.d.
LOC_Os01g56580	Persistent PEG	No		n.d.	PEG	PEG	PEG		PEG	PEG
LOC_Os02g36680	n.d.	No		n.d.	n.d.	PEG	PEG		n.d.	PEG
LOC_Os02g36710	7 DAP-specific PEGs	No		n.d.	n.d.	n.d.	n.d.		n.d.	n.d.
LOC_Os02g37020	n.d.	No		n.d.	n.d.	PEG	n.d.		n.d.	n.d.
LOC_Os02g37440	7 DAP-specific PEGs	No		n.d.	n.d.	n.d.	n.d.		n.d.	n.d.
LOC_Os02g37856	3 DAP-specific PEGs	No		n.d.	n.d.	PEG	n.d.		n.d.	n.d.
LOC_Os02g37856	n.d.	No		n.d.	n.d.	PEG	n.d.		n.d.	n.d.
LOC_Os02g12840	n.d.	No		PEG	n.d.	n.d.	n.d.		n.d.	n.d.
LOC_Os01g61590	n.d.	No		n.d.	PEG	PEG	PEG		PEG	PEG
LOC_Os02g40770	3 DAP-specific PEGs	No		n.d.	n.d.	n.d.	n.d.		n.d.	n.d.
LOC_Os01g65850	Persistent PEG	No		PEG	n.d.	PEG	n.d.		PEG	PEG
LOC_Os01g67250	n.d.	No		n.d.	PEG	PEG	PEG		PEG	n.d.
LOC_Os02g29110	Persistent PEG	No		n.d.	n.d.	PEG	n.d.		n.d.	n.d.
LOC_Os02g41630	n.d.	No		n.d.	n.d.	PEG	n.d.		n.d.	n.d.
LOC_Os02g44102	3 DAP-specific PEGs	No		n.d.	n.d.	n.d.	n.d.		n.d.	n.d.
LOC_Os01g68820	Persistent PEG	No		PEG	n.d.	PEG	PEG		n.d.	PEG
LOC_Os02g45344	n.d.	No		n.d.	n.d.	PEG	n.d.		n.d.	n.d.
LOC_Os02g34360	Persistent PEG	No		n.d.	n.d.	PEG	PEG		n.d.	n.d.
LOC_Os02g05630	n.d.	No		n.d.	PEG	PEG	PEG		PEG	n.d.
LOC_Os02g48320	3 DAP-specific PEGs	No		n.d.	n.d.	n.d.	n.d.		n.d.	n.d.
LOC_Os02g49150	3 or 7 DAP-specific PEGs	No		n.d.	n.d.	n.d.	n.d.		n.d.	n.d.
LOC_Os02g50480	3 DAP-specific PEGs	No		n.d.	n.d.	n.d.	n.d.		n.d.	n.d.
LOC_Os02g50850	5 DAP-specific PEGs	No		n.d.	n.d.	n.d.	n.d.		n.d.	n.d.
LOC_Os02g34370	Persistent PEG	No		n.d.	n.d.	PEG	PEG		n.d.	n.d.
LOC_Os02g07790	n.d.	No		n.d.	PEG	PEG	PEG		PEG	PEG
LOC_Os02g34500	7 DAP-specific PEGs	No		n.d.	n.d.	PEG	PEG		n.d.	n.d.
LOC_Os02g29140	Persistent PEG	No		PEG	n.d.	n.d.	n.d.		PEG	n.d.
LOC_Os01g63250	n.d.	No		PEG	PEG	PEG	PEG		PEG	PEG
LOC_Os01g61590	Persistent PEG	No		n.d.	PEG	PEG	PEG		PEG	PEG
LOC_Os02g51780	n.d.	No		n.d.	n.d.	PEG	n.d.		n.d.	n.d.
LOC_Os02g36680	Persistent PEG	No		n.d.	n.d.	PEG	PEG		n.d.	PEG
LOC_Os02g51850	n.d.	No		n.d.	n.d.	PEG	n.d.		n.d.	n.d.
LOC_Os01g67250	Persistent PEG	No		n.d.	PEG	PEG	PEG		PEG	n.d.
LOC_Os02g29140	n.d.	No		PEG	n.d.	n.d.	n.d.		PEG	n.d.
LOC_Os02g29150	3 or 5 DAP-specific PEGs	No		PEG	n.d.	n.d.	n.d.		n.d.	n.d.
LOC_Os02g52920	Persistent PEG	No		n.d.	n.d.	n.d.	n.d.		n.d.	n.d.
LOC_Os02g29150	n.d.	No		PEG	n.d.	n.d.	n.d.		n.d.	n.d.
LOC_Os02g35144	3 or 5 DAP-specific PEGs	No		PEG	n.d.	n.d.	n.d.		n.d.	n.d.
LOC_Os02g53740	3 or 5 DAP-specific PEGs	No		n.d.	n.d.	n.d.	n.d.		n.d.	n.d.
LOC_Os02g35144	n.d.	No		PEG	n.d.	n.d.	n.d.		n.d.	n.d.
LOC_Os02g17910	n.d.	No		n.d.	PEG	PEG	n.d.		n.d.	PEG
LOC_Os01g70060	n.d.	No		PEG	PEG	n.d.	PEG		PEG	n.d.
LOC_Os02g56880	3 DAP-specific PEGs	No		n.d.	n.d.	n.d.	n.d.		n.d.	n.d.
LOC_Os02g41630	5 or 7 DAP-specific PEGs	No		n.d.	n.d.	PEG	n.d.		n.d.	n.d.
LOC_Os02g39920	n.d.	No		PEG	n.d.	PEG	PEG		n.d.	PEG
LOC_Os02g45344	Persistent PEG	No		n.d.	n.d.	PEG	n.d.		n.d.	n.d.
LOC_Os02g05630	Persistent PEG	No		n.d.	PEG	PEG	PEG		PEG	n.d.
LOC_Os02g41610	n.d.	No		n.d.	PEG	PEG	PEG		PEG	PEG
LOC_Os02g47950	n.d.	No		n.d.	PEG	PEG	n.d.		PEG	n.d.
LOC_Os02g57820	n.d.	No		n.d.	n.d.	PEG	PEG		n.d.	n.d.
LOC_Os02g07790	Persistent PEG	No		n.d.	PEG	PEG	PEG		PEG	PEG
LOC_Os03g02180	7 DAP-specific PEGs	Yes		n.d.	n.d.	n.d.	n.d.		n.d.	n.d.
LOC_Os03g03070	n.d.	No		n.d.	n.d.	PEG	PEG		n.d.	PEG
LOC_Os03g03070	3 or 7 DAP-specific PEGs	No		n.d.	n.d.	PEG	PEG		n.d.	PEG
LOC_Os03g03100	3 DAP-specific PEGs	No		n.d.	n.d.	n.d.	n.d.		n.d.	n.d.
LOC_Os03g03920	3 DAP-specific PEGs	No		n.d.	n.d.	n.d.	n.d.		n.d.	n.d.
LOC_Os03g04545	5 DAP-specific PEGs	Yes		n.d.	n.d.	n.d.	n.d.		n.d.	n.d.
LOC_Os03g05180	n.d.	No		n.d.	n.d.	n.d.	n.d.		n.d.	PEG
LOC_Os03g05180	5 or 7 DAP-specific PEGs	No		n.d.	n.d.	n.d.	n.d.		n.d.	PEG
LOC_Os03g05480	n.d.	No		n.d.	n.d.	PEG	PEG		n.d.	n.d.
LOC_Os01g63250	Persistent PEG	No		PEG	PEG	PEG	PEG		PEG	PEG
LOC_Os03g07080	3 DAP-specific PEGs	No		n.d.	n.d.	n.d.	n.d.		n.d.	n.d.
LOC_Os03g07130	n.d.	No		n.d.	n.d.	PEG	PEG		PEG	n.d.
LOC_Os02g17910	Persistent PEG	No		n.d.	PEG	PEG	n.d.		n.d.	PEG
LOC_Os03g09150	5 DAP-specific PEGs	No		n.d.	n.d.	n.d.	n.d.		n.d.	n.d.
LOC_Os03g09280	n.d.	Yes		n.d.	n.d.	PEG	n.d.		n.d.	n.d.
LOC_Os02g52960	n.d.	No		PEG	n.d.	PEG	n.d.		n.d.	n.d.
LOC_Os02g51780	5 DAP-specific PEGs	No		n.d.	n.d.	PEG	n.d.		n.d.	n.d.
LOC_Os03g12570	3 DAP-specific PEGs	No		n.d.	n.d.	n.d.	n.d.		n.d.	n.d.
LOC_Os03g14280	5 or 7 DAP-specific PEGs	No		n.d.	n.d.	n.d.	n.d.		n.d.	n.d.
LOC_Os03g14290	n.d.	No		n.d.	n.d.	n.d.	PEG		n.d.	PEG
LOC_Os03g14290	3 or 7 DAP-specific PEGs	No		n.d.	n.d.	n.d.	PEG		n.d.	PEG
LOC_Os03g14300	n.d.	No		n.d.	n.d.	n.d.	PEG		n.d.	PEG
LOC_Os03g15010	n.d.	No		n.d.	n.d.	n.d.	PEG		n.d.	n.d.
LOC_Os03g15010	Persistent PEG	No		n.d.	n.d.	n.d.	PEG		n.d.	n.d.
LOC_Os03g16570	7 DAP-specific PEGs	No		n.d.	n.d.	n.d.	n.d.		n.d.	n.d.
LOC_Os03g16730	3 DAP-specific PEGs	No		n.d.	n.d.	n.d.	n.d.		n.d.	n.d.
LOC_Os03g17980	3 DAP-specific PEGs	No		n.d.	n.d.	n.d.	n.d.		n.d.	n.d.
LOC_Os02g51850	Persistent PEG	No		n.d.	n.d.	PEG	n.d.		n.d.	n.d.
LOC_Os02g50860	n.d.	No		n.d.	PEG	PEG	n.d.		PEG	n.d.
LOC_Os02g54120	n.d.	No		PEG	n.d.	n.d.	n.d.		n.d.	n.d.
LOC_Os02g39920	Persistent PEG	No		PEG	n.d.	PEG	PEG		n.d.	PEG
LOC_Os02g21430	n.d.	No		PEG	PEG	PEG	PEG		PEG	PEG
LOC_Os02g51550	n.d.	No		n.d.	PEG	PEG	PEG		PEG	n.d.
LOC_Os03g24910	3 DAP-specific PEGs	No		n.d.	n.d.	n.d.	n.d.		n.d.	n.d.
LOC_Os02g21430	Persistent PEG	No		PEG	PEG	PEG	PEG		PEG	PEG
LOC_Os02g56530	n.d.	No		n.d.	PEG	PEG	PEG		n.d.	PEG
LOC_Os03g25600	3 DAP-specific PEGs	No		n.d.	n.d.	n.d.	n.d.		n.d.	n.d.
LOC_Os02g41610	Persistent PEG	No		n.d.	PEG	PEG	PEG		PEG	PEG
LOC_Os02g57190	n.d.	No		PEG	n.d.	PEG	PEG		n.d.	n.d.
LOC_Os02g57820	Persistent PEG	No		n.d.	n.d.	PEG	PEG		n.d.	n.d.
LOC_Os03g19920	n.d.	No		PEG	n.d.	PEG	n.d.		n.d.	n.d.
LOC_Os03g27820	7 DAP-specific PEGs	No		n.d.	n.d.	n.d.	n.d.		n.d.	n.d.
LOC_Os03g29470	Persistent PEG	No		n.d.	n.d.	n.d.	n.d.		n.d.	n.d.
LOC_Os03g31070	5 or 7 DAP-specific PEGs	No		n.d.	n.d.	n.d.	n.d.		n.d.	n.d.
LOC_Os03g33590	7 DAP-specific PEGs	No		n.d.	n.d.	n.d.	n.d.		n.d.	n.d.
LOC_Os03g36790	n.d.	No		n.d.	n.d.	PEG	PEG		PEG	PEG
LOC_Os03g05480	5 or 7 DAP-specific PEGs	No		n.d.	n.d.	PEG	PEG		n.d.	n.d.
LOC_Os03g37270	7 DAP-specific PEGs	No		n.d.	n.d.	n.d.	n.d.		n.d.	n.d.
LOC_Os03g07130	5 or 7 DAP-specific PEGs	No		n.d.	n.d.	PEG	PEG		PEG	n.d.
LOC_Os03g27450	n.d.	No		PEG	n.d.	PEG	PEG		n.d.	PEG
LOC_Os02g51540	n.d.	No		PEG	PEG	PEG	PEG		PEG	PEG
LOC_Os02g52960	Persistent PEG	No		PEG	n.d.	PEG	n.d.		n.d.	n.d.
LOC_Os03g42050	Persistent PEG	No		n.d.	n.d.	n.d.	n.d.		n.d.	n.d.
LOC_Os03g43580	7 DAP-specific PEGs	No		n.d.	n.d.	n.d.	n.d.		n.d.	n.d.
LOC_Os03g43590	n.d.	Yes		n.d.	n.d.	PEG	PEG		n.d.	n.d.
LOC_Os02g47950	5 or 7 DAP-specific PEGs	No		n.d.	PEG	PEG	n.d.		PEG	n.d.
LOC_Os03g43890	n.d.	No		n.d.	n.d.	n.d.	n.d.		PEG	n.d.
LOC_Os03g43890	Persistent PEG	No		n.d.	n.d.	n.d.	n.d.		PEG	n.d.
LOC_Os03g45210	n.d.	No		n.d.	n.d.	n.d.	PEG		n.d.	n.d.
LOC_Os03g47686	n.d.	No		n.d.	n.d.	PEG	n.d.		n.d.	n.d.
LOC_Os02g50860	Persistent PEG	No		n.d.	PEG	PEG	n.d.		PEG	n.d.
LOC_Os03g47693	n.d.	No		n.d.	n.d.	PEG	n.d.		n.d.	n.d.
LOC_Os03g47693	3 DAP-specific PEGs	No		n.d.	n.d.	PEG	n.d.		n.d.	n.d.
LOC_Os03g49770	3 DAP-specific PEGs	No		n.d.	n.d.	n.d.	n.d.		n.d.	n.d.
LOC_Os03g50330	Persistent PEG	No		n.d.	n.d.	n.d.	n.d.		n.d.	n.d.
LOC_Os03g50440	5 DAP-specific PEGs	No		n.d.	n.d.	n.d.	n.d.		n.d.	n.d.
LOC_Os03g51610	n.d.	No		n.d.	n.d.	PEG	PEG		n.d.	n.d.
LOC_Os02g51550	Persistent PEG	No		n.d.	PEG	PEG	PEG		PEG	n.d.
LOC_Os03g52594	n.d.	No		n.d.	n.d.	PEG	n.d.		n.d.	n.d.
LOC_Os02g56530	Persistent PEG	No		n.d.	PEG	PEG	PEG		n.d.	PEG
LOC_Os03g53590	n.d.	No		n.d.	n.d.	n.d.	n.d.		n.d.	PEG
LOC_Os03g53590	3 DAP-specific MEGs	No		n.d.	n.d.	n.d.	n.d.		n.d.	PEG
LOC_Os02g57200	n.d.	No		n.d.	PEG	n.d.	n.d.		PEG	PEG
LOC_Os02g57200	Persistent PEG	No		n.d.	PEG	n.d.	n.d.		PEG	PEG
LOC_Os03g53770	5 DAP-specific PEGs	No		n.d.	n.d.	n.d.	n.d.		n.d.	n.d.
LOC_Os03g18080	n.d.	No		n.d.	PEG	PEG	n.d.		PEG	PEG
LOC_Os02g57190	Persistent PEG	No		PEG	n.d.	PEG	PEG		n.d.	n.d.
LOC_Os03g54910	n.d.	No		n.d.	n.d.	n.d.	n.d.		PEG	n.d.
LOC_Os03g54910	Persistent PEG	No		n.d.	n.d.	n.d.	n.d.		PEG	n.d.
LOC_Os03g55630	n.d.	Yes		n.d.	n.d.	PEG	n.d.		n.d.	n.d.
LOC_Os03g36790	Persistent PEG	No		n.d.	n.d.	PEG	PEG		PEG	PEG
LOC_Os03g19920	Persistent PEG	No		PEG	n.d.	PEG	n.d.		n.d.	n.d.
LOC_Os03g27460	n.d.	No		PEG	n.d.	PEG	PEG		n.d.	PEG
LOC_Os02g57080	n.d.	No		PEG	PEG	PEG	PEG		n.d.	PEG
LOC_Os03g24900	n.d.	No		n.d.	PEG	PEG	n.d.		PEG	PEG
LOC_Os03g57130	7 DAP-specific PEGs	No		n.d.	n.d.	n.d.	n.d.		n.d.	n.d.
LOC_Os03g58060	5 or 7 DAP-specific PEGs	No		n.d.	n.d.	n.d.	n.d.		n.d.	n.d.
LOC_Os03g58130	n.d.	No		n.d.	n.d.	PEG	n.d.		PEG	n.d.
LOC_Os02g51540	Persistent PEG	No		PEG	PEG	PEG	PEG		PEG	PEG
LOC_Os03g58480	n.d.	No		n.d.	n.d.	n.d.	PEG		n.d.	n.d.
LOC_Os03g59680	n.d.	No		n.d.	n.d.	PEG	PEG		n.d.	PEG
LOC_Os03g47686	Persistent PEG	No		n.d.	n.d.	PEG	n.d.		n.d.	n.d.
LOC_Os03g59740	n.d.	No		n.d.	n.d.	PEG	n.d.		n.d.	n.d.
LOC_Os03g51610	5 or 7 DAP-specific PEGs	No		n.d.	n.d.	PEG	PEG		n.d.	n.d.
LOC_Os03g60120	3 or 5 DAP-specific PEGs	No		n.d.	n.d.	n.d.	n.d.		n.d.	n.d.
LOC_Os03g60130	n.d.	No		n.d.	n.d.	n.d.	PEG		n.d.	n.d.
LOC_Os03g60130	Persistent PEG	No		n.d.	n.d.	n.d.	PEG		n.d.	n.d.
LOC_Os03g60140	n.d.	No		n.d.	n.d.	n.d.	PEG		n.d.	PEG
LOC_Os03g60140	5 DAP-specific PEGs	No		n.d.	n.d.	n.d.	PEG		n.d.	PEG
LOC_Os03g52594	Persistent PEG	No		n.d.	n.d.	PEG	n.d.		n.d.	n.d.
LOC_Os03g25070	n.d.	No		n.d.	PEG	PEG	PEG		PEG	PEG
LOC_Os03g18080	Persistent PEG	No		n.d.	PEG	PEG	n.d.		PEG	PEG
LOC_Os03g27450	Persistent PEG	No		PEG	n.d.	PEG	PEG		n.d.	PEG
LOC_Os03g40930	n.d.	No		n.d.	PEG	PEG	PEG		PEG	n.d.
LOC_Os03g58130	Persistent PEG	No		n.d.	n.d.	PEG	n.d.		PEG	n.d.
LOC_Os03g62660	5 or 7 DAP-specific PEGs	No		n.d.	n.d.	n.d.	n.d.		n.d.	n.d.
LOC_Os03g53630	n.d.	No		n.d.	PEG	n.d.	PEG		PEG	PEG
LOC_Os03g53630	Persistent PEG	No		n.d.	PEG	n.d.	PEG		PEG	PEG
LOC_Os03g63770	n.d.	Yes		n.d.	n.d.	n.d.	PEG		PEG	PEG
LOC_Os03g63770	Persistent PEG	Yes		n.d.	n.d.	n.d.	PEG		PEG	PEG
LOC_Os03g54900	n.d.	No		n.d.	PEG	PEG	PEG		PEG	n.d.
LOC_Os04g05010	3 DAP-specific PEGs	No		n.d.	n.d.	n.d.	n.d.		n.d.	n.d.
LOC_Os04g05030	n.d.	No		n.d.	n.d.	PEG	PEG		n.d.	n.d.
LOC_Os03g59680	7 DAP-specific PEGs	No		n.d.	n.d.	PEG	PEG		n.d.	PEG
LOC_Os04g06770	n.d.	No		n.d.	n.d.	n.d.	PEG		n.d.	n.d.
LOC_Os04g06770	Persistent PEG	No		n.d.	n.d.	n.d.	PEG		n.d.	n.d.
LOC_Os04g08470	n.d.	No		n.d.	n.d.	PEG	PEG		PEG	PEG
LOC_Os03g59740	Persistent PEG	No		n.d.	n.d.	PEG	n.d.		n.d.	n.d.
LOC_Os04g08510	n.d.	No		n.d.	n.d.	PEG	n.d.		n.d.	n.d.
LOC_Os04g10680	3 DAP-specific PEGs	No		n.d.	n.d.	n.d.	n.d.		n.d.	n.d.
LOC_Os03g24900	Persistent PEG	No		n.d.	PEG	PEG	n.d.		PEG	PEG
LOC_Os03g56310	n.d.	No		n.d.	PEG	PEG	PEG		PEG	PEG
LOC_Os04g17700	Persistent PEG	No		n.d.	n.d.	n.d.	n.d.		n.d.	n.d.
LOC_Os03g25070	Persistent PEG	No		n.d.	PEG	PEG	PEG		PEG	PEG
LOC_Os03g56250	n.d.	No		PEG	n.d.	PEG	n.d.		PEG	n.d.
LOC_Os02g57080	Persistent PEG	No		PEG	PEG	PEG	PEG		n.d.	PEG
LOC_Os04g20774	n.d.	No		PEG	n.d.	PEG	PEG		n.d.	n.d.
LOC_Os04g24410	7 DAP-specific PEGs	No		n.d.	n.d.	n.d.	n.d.		n.d.	n.d.
LOC_Os04g31160	3 DAP-specific PEGs	No		n.d.	n.d.	n.d.	n.d.		n.d.	n.d.
LOC_Os03g40930	7 DAP-specific PEGs	No		n.d.	PEG	PEG	PEG		PEG	n.d.
LOC_Os03g60710	n.d.	No		n.d.	PEG	PEG	PEG		PEG	PEG
LOC_Os04g05030	Persistent PEG	No		n.d.	n.d.	PEG	PEG		n.d.	n.d.
LOC_Os03g61120	n.d.	No		n.d.	PEG	PEG	PEG		PEG	n.d.
LOC_Os04g08470	Persistent PEG	No		n.d.	n.d.	PEG	PEG		PEG	PEG
LOC_Os04g22240	n.d.	No		PEG	n.d.	PEG	PEG		n.d.	PEG
LOC_Os04g32970	n.d.	No		n.d.	n.d.	PEG	PEG		n.d.	PEG
LOC_Os03g54900	Persistent PEG	No		n.d.	PEG	PEG	PEG		PEG	n.d.
LOC_Os03g27460	Persistent PEG	No		PEG	n.d.	PEG	PEG		n.d.	PEG
LOC_Os04g34440	3 DAP-specific PEGs	No		n.d.	n.d.	n.d.	n.d.		n.d.	n.d.
LOC_Os04g36620	Persistent PEG	No		n.d.	n.d.	n.d.	n.d.		n.d.	n.d.
LOC_Os04g38550	7 DAP-specific PEGs	No		n.d.	n.d.	n.d.	n.d.		n.d.	n.d.
LOC_Os04g38950	5 DAP-specific PEGs	No		n.d.	n.d.	n.d.	n.d.		n.d.	n.d.
LOC_Os04g39240	5 or 7 DAP-specific PEGs	Yes		n.d.	n.d.	n.d.	n.d.		n.d.	n.d.
LOC_Os03g56250	Persistent PEG	No		PEG	n.d.	PEG	n.d.		PEG	n.d.
LOC_Os03g63040	n.d.	No		n.d.	PEG	n.d.	PEG		PEG	n.d.
LOC_Os04g41110	3 DAP-specific PEGs	No		n.d.	n.d.	n.d.	n.d.		n.d.	n.d.
LOC_Os03g63040	Persistent PEG	No		n.d.	PEG	n.d.	PEG		PEG	n.d.
LOC_Os03g63940	n.d.	No		n.d.	PEG	n.d.	n.d.		PEG	n.d.
LOC_Os04g42230	3 DAP-specific PEGs	No		n.d.	n.d.	n.d.	n.d.		n.d.	n.d.
LOC_Os04g11830	n.d.	No		n.d.	PEG	PEG	n.d.		n.d.	n.d.
LOC_Os03g56310	Persistent PEG	No		n.d.	PEG	PEG	PEG		PEG	PEG
LOC_Os04g42260	n.d.	No		n.d.	n.d.	PEG	n.d.		n.d.	PEG
LOC_Os03g60710	Persistent PEG	No		n.d.	PEG	PEG	PEG		PEG	PEG
LOC_Os04g42600	n.d.	No		n.d.	n.d.	PEG	PEG		PEG	n.d.
LOC_Os04g20774	Persistent PEG	No		PEG	n.d.	PEG	PEG		n.d.	n.d.
LOC_Os04g42634	n.d.	No		n.d.	n.d.	n.d.	n.d.		PEG	n.d.
LOC_Os04g42634	Persistent PEG	No		n.d.	n.d.	n.d.	n.d.		PEG	n.d.
LOC_Os04g43130	5 or 7 DAP-specific PEGs	No		n.d.	n.d.	n.d.	n.d.		n.d.	n.d.
LOC_Os04g44710	Persistent PEG	No		n.d.	n.d.	n.d.	n.d.		n.d.	n.d.
LOC_Os04g46020	Persistent PEG	No		n.d.	n.d.	n.d.	n.d.		n.d.	n.d.
LOC_Os04g46450	n.d.	No		n.d.	n.d.	PEG	n.d.		n.d.	n.d.
LOC_Os04g46450	3 DAP-specific PEGs	No		n.d.	n.d.	PEG	n.d.		n.d.	n.d.
LOC_Os04g47410	7 DAP-specific PEGs	Yes		n.d.	n.d.	n.d.	n.d.		n.d.	n.d.
LOC_Os04g48160	n.d.	No		n.d.	n.d.	PEG	n.d.		n.d.	n.d.
LOC_Os04g49410	3 DAP-specific PEGs	No		n.d.	n.d.	n.d.	n.d.		n.d.	n.d.
LOC_Os04g51380	Persistent PEG	No		n.d.	n.d.	n.d.	n.d.		n.d.	n.d.
LOC_Os04g53450	5 or 7 DAP-specific PEGs	No		n.d.	n.d.	n.d.	n.d.		n.d.	n.d.
LOC_Os04g53740	3 DAP-specific PEGs	No		n.d.	n.d.	n.d.	n.d.		n.d.	n.d.
LOC_Os04g54420	n.d.	No		n.d.	n.d.	PEG	PEG		PEG	PEG
LOC_Os04g33460	n.d.	No		PEG	n.d.	n.d.	n.d.		n.d.	n.d.
LOC_Os04g55960	7 DAP-specific PEGs	No		n.d.	n.d.	n.d.	n.d.		n.d.	n.d.
LOC_Os04g31170	n.d.	No		n.d.	PEG	PEG	n.d.		PEG	PEG
LOC_Os04g32970	Persistent PEG	No		n.d.	n.d.	PEG	PEG		n.d.	PEG
LOC_Os04g40660	n.d.	No		n.d.	PEG	PEG	PEG		PEG	PEG
LOC_Os04g22240	Persistent PEG	No		PEG	n.d.	PEG	PEG		n.d.	PEG
LOC_Os04g41470	n.d.	No		n.d.	PEG	PEG	PEG		PEG	PEG
LOC_Os04g58750	3 or 5 DAP-specific PEGs	No		n.d.	n.d.	n.d.	n.d.		n.d.	n.d.
LOC_Os04g59394	3 DAP-specific PEGs	No		n.d.	n.d.	n.d.	n.d.		n.d.	n.d.
LOC_Os04g59400	3 DAP-specific PEGs	No		n.d.	n.d.	n.d.	n.d.		n.d.	n.d.
LOC_Os05g01020	Persistent PEG	No		n.d.	n.d.	n.d.	n.d.		n.d.	n.d.
LOC_Os03g61120	Persistent PEG	No		n.d.	PEG	PEG	PEG		PEG	n.d.
LOC_Os04g32880	n.d.	No		PEG	PEG	PEG	n.d.		PEG	PEG
LOC_Os05g01230	n.d.	No		n.d.	n.d.	n.d.	PEG		n.d.	n.d.
LOC_Os05g01230	5 or 7 DAP-specific PEGs	No		n.d.	n.d.	n.d.	PEG		n.d.	n.d.
LOC_Os04g11830	5 or 7 DAP-specific PEGs	No		n.d.	PEG	PEG	n.d.		n.d.	n.d.
LOC_Os04g56720	n.d.	No		n.d.	PEG	PEG	PEG		PEG	PEG
LOC_Os04g42260	Persistent PEG	No		n.d.	n.d.	PEG	n.d.		n.d.	PEG
LOC_Os04g57640	n.d.	No		n.d.	PEG	PEG	PEG		PEG	n.d.
LOC_Os05g02260	n.d.	Yes		n.d.	n.d.	n.d.	PEG		n.d.	n.d.
LOC_Os05g02260	5 DAP-specific PEGs	Yes		n.d.	n.d.	n.d.	PEG		n.d.	n.d.
LOC_Os05g03630	n.d.	No		n.d.	n.d.	PEG	PEG		n.d.	n.d.
LOC_Os04g42600	Persistent PEG	No		n.d.	n.d.	PEG	PEG		PEG	n.d.
LOC_Os04g31170	Persistent PEG	No		n.d.	PEG	PEG	n.d.		PEG	PEG
LOC_Os04g57870	n.d.	No		n.d.	PEG	n.d.	n.d.		PEG	n.d.
LOC_Os05g04520	n.d.	No		n.d.	n.d.	PEG	PEG		n.d.	PEG
LOC_Os04g40660	Persistent PEG	No		n.d.	PEG	PEG	PEG		PEG	PEG
LOC_Os05g04540	n.d.	No		n.d.	n.d.	n.d.	n.d.		PEG	n.d.
LOC_Os05g04540	5 DAP-specific PEGs	No		n.d.	n.d.	n.d.	n.d.		PEG	n.d.
LOC_Os05g05230	3 DAP-specific PEGs	No		n.d.	n.d.	n.d.	n.d.		n.d.	n.d.
LOC_Os05g05390	3 DAP-specific PEGs	No		n.d.	n.d.	n.d.	n.d.		n.d.	n.d.
LOC_Os05g01210	n.d.	No		n.d.	PEG	PEG	PEG		PEG	n.d.
LOC_Os04g41470	Persistent PEG	No		n.d.	PEG	PEG	PEG		PEG	PEG
LOC_Os04g55930	n.d.	No		PEG	n.d.	n.d.	n.d.		n.d.	n.d.
LOC_Os05g05780	n.d.	No		PEG	n.d.	PEG	PEG		n.d.	PEG
LOC_Os05g05800	n.d.	Yes		n.d.	n.d.	PEG	n.d.		n.d.	n.d.
LOC_Os04g32880	Persistent PEG	No		PEG	PEG	PEG	n.d.		PEG	PEG
LOC_Os05g06260	n.d.	No		n.d.	n.d.	n.d.	PEG		n.d.	n.d.
LOC_Os05g07670	7 DAP-specific PEGs	No		n.d.	n.d.	n.d.	n.d.		n.d.	n.d.
LOC_Os05g07720	n.d.	No		n.d.	n.d.	PEG	n.d.		n.d.	n.d.
LOC_Os04g56720	5 or 7 DAP-specific PEGs	No		n.d.	PEG	PEG	PEG		PEG	PEG
LOC_Os05g08730	5 DAP-specific PEGs	No		n.d.	n.d.	n.d.	n.d.		n.d.	n.d.
LOC_Os05g08840	n.d.	No		n.d.	n.d.	n.d.	n.d.		n.d.	PEG
LOC_Os05g08840	Persistent PEG	No		n.d.	n.d.	n.d.	n.d.		n.d.	PEG
LOC_Os05g09620	3 DAP-specific PEGs	No		n.d.	n.d.	n.d.	n.d.		n.d.	n.d.
LOC_Os05g11140	n.d.	No		n.d.	n.d.	PEG	n.d.		n.d.	PEG
LOC_Os05g03630	Persistent PEG	No		n.d.	n.d.	PEG	PEG		n.d.	n.d.
LOC_Os05g12170	5 or 7 DAP-specific PEGs	Yes		n.d.	n.d.	n.d.	n.d.		n.d.	n.d.
LOC_Os05g12460	3 DAP-specific PEGs	No		n.d.	n.d.	n.d.	n.d.		n.d.	n.d.
LOC_Os05g12670	n.d.	No		n.d.	n.d.	PEG	n.d.		n.d.	n.d.
LOC_Os04g57640	Persistent PEG	No		n.d.	PEG	PEG	PEG		PEG	n.d.
LOC_Os05g16140	3 DAP-specific PEGs	No		n.d.	n.d.	n.d.	n.d.		n.d.	n.d.
LOC_Os05g23420	3 or 5 DAP-specific PEGs	No		n.d.	n.d.	n.d.	n.d.		n.d.	n.d.
LOC_Os05g01710	n.d.	No		n.d.	PEG	PEG	n.d.		n.d.	n.d.
LOC_Os05g04520	5 or 7 DAP-specific PEGs	No		n.d.	n.d.	PEG	PEG		n.d.	PEG
LOC_Os05g27920	3 DAP-specific PEGs	No		n.d.	n.d.	n.d.	n.d.		n.d.	n.d.
LOC_Os05g28180	n.d.	No		n.d.	n.d.	PEG	PEG		n.d.	PEG
LOC_Os05g01210	Persistent PEG	No		n.d.	PEG	PEG	PEG		PEG	n.d.
LOC_Os05g28200	5 DAP-specific PEGs	Yes		n.d.	n.d.	n.d.	n.d.		n.d.	n.d.
LOC_Os05g28440	Persistent PEG	No		n.d.	n.d.	n.d.	n.d.		n.d.	n.d.
LOC_Os05g28860	Persistent PEG	No		n.d.	n.d.	n.d.	n.d.		n.d.	n.d.
LOC_Os05g28870	5 or 7 DAP-specific PEGs	No		n.d.	n.d.	n.d.	n.d.		n.d.	n.d.
LOC_Os05g30870	3 DAP-specific PEGs	No		n.d.	n.d.	n.d.	n.d.		n.d.	n.d.
LOC_Os05g31254	3 DAP-specific PEGs	No		n.d.	n.d.	n.d.	n.d.		n.d.	n.d.
LOC_Os05g04330	n.d.	No		n.d.	PEG	PEG	PEG		PEG	PEG
LOC_Os05g07720	Persistent PEG	No		n.d.	n.d.	PEG	n.d.		n.d.	n.d.
LOC_Os04g42250	n.d.	No		PEG	PEG	PEG	PEG		PEG	PEG
LOC_Os05g11140	Persistent PEG	No		n.d.	n.d.	PEG	n.d.		n.d.	PEG
LOC_Os05g32880	3 DAP-specific PEGs	No		n.d.	n.d.	n.d.	n.d.		n.d.	n.d.
LOC_Os05g33550	n.d.	No		n.d.	n.d.	PEG	n.d.		n.d.	n.d.
LOC_Os05g33550	3 DAP-specific PEGs	No		n.d.	n.d.	PEG	n.d.		n.d.	n.d.
LOC_Os05g34510	n.d.	No		n.d.	n.d.	n.d.	PEG		n.d.	n.d.
LOC_Os05g34510	Persistent PEG	No		n.d.	n.d.	n.d.	PEG		n.d.	n.d.
LOC_Os05g34540	n.d.	No		n.d.	n.d.	n.d.	PEG		n.d.	n.d.
LOC_Os05g34540	3 DAP-specific PEGs	No		n.d.	n.d.	n.d.	PEG		n.d.	n.d.
LOC_Os05g34550	3 DAP-specific PEGs	No		n.d.	n.d.	n.d.	n.d.		n.d.	n.d.
LOC_Os05g38640	5 or 7 DAP-specific PEGs	Yes		n.d.	n.d.	n.d.	n.d.		n.d.	n.d.
LOC_Os05g40810	7 DAP-specific PEGs	Yes		n.d.	n.d.	n.d.	n.d.		n.d.	n.d.
LOC_Os05g41200	5 DAP-specific PEGs	Yes		n.d.	n.d.	n.d.	n.d.		n.d.	n.d.
LOC_Os05g24000	n.d.	No		n.d.	PEG	PEG	n.d.		PEG	n.d.
LOC_Os05g12670	5 or 7 DAP-specific PEGs	No		n.d.	n.d.	PEG	n.d.		n.d.	n.d.
LOC_Os05g01710	Persistent PEG	No		n.d.	PEG	PEG	n.d.		n.d.	n.d.
LOC_Os05g05790	n.d.	No		PEG	n.d.	n.d.	PEG		n.d.	n.d.
LOC_Os05g41790	n.d.	No		n.d.	n.d.	PEG	n.d.		PEG	n.d.
LOC_Os05g28180	Persistent PEG	No		n.d.	n.d.	PEG	PEG		n.d.	PEG
LOC_Os05g31380	n.d.	No		n.d.	PEG	PEG	PEG		PEG	PEG
LOC_Os05g04330	Persistent PEG	No		n.d.	PEG	PEG	PEG		PEG	PEG
LOC_Os05g43560	n.d.	No		n.d.	n.d.	PEG	n.d.		n.d.	n.d.
LOC_Os04g42250	Persistent PEG	No		PEG	PEG	PEG	PEG		PEG	PEG
LOC_Os05g43570	n.d.	No		n.d.	n.d.	n.d.	n.d.		PEG	PEG
LOC_Os05g43570	Persistent PEG	No		n.d.	n.d.	n.d.	n.d.		PEG	PEG
LOC_Os05g45060	3 DAP-specific PEGs	No		n.d.	n.d.	n.d.	n.d.		n.d.	n.d.
LOC_Os05g45830	3 DAP-specific PEGs	No		n.d.	n.d.	n.d.	n.d.		n.d.	n.d.
LOC_Os05g45930	n.d.	No		n.d.	n.d.	PEG	n.d.		n.d.	PEG
LOC_Os05g24000	Persistent PEG	No		n.d.	PEG	PEG	n.d.		PEG	n.d.
LOC_Os05g46490	5 DAP-specific PEGs	No		n.d.	n.d.	n.d.	n.d.		n.d.	n.d.
LOC_Os05g48280	5 or 7 DAP-specific PEGs	No		n.d.	n.d.	n.d.	MEG		n.d.	n.d.
LOC_Os05g05790	5 or 7 DAP-specific PEGs	No		PEG	n.d.	n.d.	PEG		n.d.	n.d.
LOC_Os05g48560	n.d.	No		PEG	n.d.	PEG	PEG		n.d.	PEG
LOC_Os05g48590	5 or 7 DAP-specific PEGs	Yes		n.d.	n.d.	n.d.	n.d.		n.d.	n.d.
LOC_Os05g48970	n.d.	No		n.d.	n.d.	PEG	n.d.		n.d.	n.d.
LOC_Os05g05780	Persistent PEG	No		PEG	n.d.	PEG	PEG		n.d.	PEG
LOC_Os05g48980	n.d.	No		n.d.	n.d.	PEG	PEG		PEG	PEG
LOC_Os05g41790	Persistent PEG	No		n.d.	n.d.	PEG	n.d.		PEG	n.d.
LOC_Os05g49120	3 or 5 DAP-specific PEGs	No		n.d.	n.d.	n.d.	n.d.		n.d.	n.d.
LOC_Os05g50960	Persistent PEG	No		n.d.	n.d.	n.d.	n.d.		n.d.	n.d.
LOC_Os05g32570	n.d.	No		n.d.	PEG	PEG	PEG		PEG	n.d.
LOC_Os05g31380	Persistent PEG	No		n.d.	PEG	PEG	PEG		PEG	PEG
LOC_Os05g41210	n.d.	No		n.d.	PEG	n.d.	n.d.		PEG	n.d.
LOC_Os05g41210	Persistent PEG	No		n.d.	PEG	n.d.	n.d.		PEG	n.d.
LOC_Os06g01200	3 DAP-specific PEGs	No		n.d.	n.d.	n.d.	n.d.		n.d.	n.d.
LOC_Os06g01680	n.d.	No		n.d.	n.d.	PEG	PEG		n.d.	n.d.
LOC_Os05g43560	5 DAP-specific PEGs	No		n.d.	n.d.	PEG	n.d.		n.d.	n.d.
LOC_Os05g43480	n.d.	No		n.d.	PEG	PEG	PEG		PEG	PEG
LOC_Os05g45930	5 or 7 DAP-specific PEGs	No		n.d.	n.d.	PEG	n.d.		n.d.	PEG
LOC_Os06g03770	3 or 7 DAP-specific PEGs	No		n.d.	n.d.	n.d.	n.d.		n.d.	n.d.
LOC_Os06g03860	n.d.	No		n.d.	n.d.	n.d.	PEG		n.d.	n.d.
LOC_Os06g03860	7 DAP-specific PEGs	No		n.d.	n.d.	n.d.	PEG		n.d.	n.d.
LOC_Os06g04920	n.d.	No		n.d.	n.d.	n.d.	n.d.		n.d.	PEG
LOC_Os06g04920	Persistent PEG	No		n.d.	n.d.	n.d.	n.d.		n.d.	PEG
LOC_Os06g04930	n.d.	Yes		n.d.	n.d.	n.d.	PEG		PEG	n.d.
LOC_Os06g04930	Persistent PEG	Yes		n.d.	n.d.	n.d.	PEG		PEG	n.d.
LOC_Os06g04940	5 DAP-specific PEGs	Yes		n.d.	n.d.	n.d.	n.d.		n.d.	n.d.
LOC_Os06g06090	3 DAP-specific PEGs	No		n.d.	n.d.	n.d.	n.d.		n.d.	n.d.
LOC_Os05g48970	5 or 7 DAP-specific PEGs	No		n.d.	n.d.	PEG	n.d.		n.d.	n.d.
LOC_Os06g06870	n.d.	No		PEG	n.d.	PEG	PEG		n.d.	PEG
LOC_Os06g07700	Persistent PEG	No		n.d.	n.d.	n.d.	n.d.		n.d.	n.d.
LOC_Os05g48980	Persistent PEG	No		n.d.	n.d.	PEG	PEG		PEG	PEG
LOC_Os05g50970	n.d.	No		n.d.	PEG	n.d.	PEG		PEG	PEG
LOC_Os06g10480	5 DAP-specific PEGs	No		n.d.	n.d.	n.d.	n.d.		n.d.	n.d.
LOC_Os06g11190	n.d.	Yes		n.d.	n.d.	PEG	n.d.		n.d.	n.d.
LOC_Os05g32570	5 DAP-specific PEGs	No		n.d.	PEG	PEG	PEG		PEG	n.d.
LOC_Os06g11620	n.d.	No		n.d.	n.d.	PEG	PEG		n.d.	PEG
LOC_Os06g01680	Persistent PEG	No		n.d.	n.d.	PEG	PEG		n.d.	n.d.
LOC_Os06g12260	n.d.	No		n.d.	n.d.	n.d.	n.d.		PEG	n.d.
LOC_Os06g12260	3 or 7 DAP-specific PEGs	No		n.d.	n.d.	n.d.	n.d.		PEG	n.d.
LOC_Os06g12280	5 or 7 DAP-specific PEGs	Yes		n.d.	n.d.	n.d.	n.d.		n.d.	n.d.
LOC_Os06g12590	n.d.	No		n.d.	n.d.	PEG	n.d.		n.d.	n.d.
LOC_Os05g43480	Persistent PEG	No		n.d.	PEG	PEG	PEG		PEG	PEG
LOC_Os06g12680	n.d.	No		n.d.	n.d.	PEG	PEG		n.d.	n.d.
LOC_Os05g48560	Persistent PEG	No		PEG	n.d.	PEG	PEG		n.d.	PEG
LOC_Os06g14440	n.d.	No		n.d.	n.d.	PEG	n.d.		PEG	n.d.
LOC_Os06g06870	Persistent PEG	No		PEG	n.d.	PEG	PEG		n.d.	PEG
LOC_Os06g19650	n.d.	No		n.d.	n.d.	PEG	n.d.		PEG	n.d.
LOC_Os06g11620	Persistent PEG	No		n.d.	n.d.	PEG	PEG		n.d.	PEG
LOC_Os06g19660	n.d.	No		n.d.	n.d.	n.d.	n.d.		PEG	n.d.
LOC_Os06g19660	5 or 7 DAP-specific PEGs	No		n.d.	n.d.	n.d.	n.d.		PEG	n.d.
LOC_Os06g21600	n.d.	No		n.d.	n.d.	PEG	n.d.		n.d.	n.d.
LOC_Os06g12590	Persistent PEG	No		n.d.	n.d.	PEG	n.d.		n.d.	n.d.
LOC_Os06g21900	n.d.	No		n.d.	n.d.	PEG	PEG		n.d.	PEG
LOC_Os06g12680	3 or 5 DAP-specific PEGs	No		n.d.	n.d.	PEG	PEG		n.d.	n.d.
LOC_Os06g22100	n.d.	No		n.d.	n.d.	PEG	n.d.		n.d.	n.d.
LOC_Os05g50970	Persistent PEG	No		n.d.	PEG	n.d.	PEG		PEG	PEG
LOC_Os05g51400	n.d.	No		n.d.	PEG	n.d.	PEG		PEG	PEG
LOC_Os06g27680	n.d.	Yes		n.d.	n.d.	PEG	n.d.		n.d.	n.d.
LOC_Os06g28820	Persistent PEG	No		n.d.	n.d.	n.d.	n.d.		n.d.	n.d.
LOC_Os05g51400	Persistent PEG	No		n.d.	PEG	n.d.	PEG		PEG	PEG
LOC_Os06g02028	n.d.	No		n.d.	PEG	PEG	PEG		PEG	PEG
LOC_Os06g35030	5 DAP-specific PEGs	No		n.d.	n.d.	n.d.	n.d.		n.d.	n.d.
LOC_Os06g35160	n.d.	No		n.d.	n.d.	PEG	n.d.		n.d.	n.d.
LOC_Os06g14440	5 or 7 DAP-specific PEGs	No		n.d.	n.d.	PEG	n.d.		PEG	n.d.
LOC_Os06g19650	5 or 7 DAP-specific PEGs	No		n.d.	n.d.	PEG	n.d.		PEG	n.d.
LOC_Os06g08740	n.d.	No		PEG	PEG	PEG	PEG		PEG	n.d.
LOC_Os06g37160	7 DAP-specific PEGs	No		n.d.	n.d.	n.d.	n.d.		n.d.	n.d.
LOC_Os06g37640	7 DAP-specific PEGs	No		n.d.	n.d.	n.d.	n.d.		n.d.	n.d.
LOC_Os06g37660	7 DAP-specific PEGs	No		n.d.	n.d.	n.d.	n.d.		n.d.	n.d.
LOC_Os06g39760	n.d.	No		n.d.	n.d.	n.d.	PEG		PEG	n.d.
LOC_Os06g21600	Persistent PEG	No		n.d.	n.d.	PEG	n.d.		n.d.	n.d.
LOC_Os06g23460	n.d.	No		PEG	PEG	PEG	n.d.		PEG	n.d.
LOC_Os06g30060	n.d.	No		n.d.	PEG	PEG	PEG		PEG	PEG
LOC_Os06g42910	n.d.	No		PEG	n.d.	n.d.	n.d.		n.d.	n.d.
LOC_Os06g42910	3 DAP-specific PEGs	No		PEG	n.d.	n.d.	n.d.		n.d.	n.d.
LOC_Os06g21900	5 or 7 DAP-specific PEGs	No		n.d.	n.d.	PEG	PEG		n.d.	PEG
LOC_Os06g45000	n.d.	No		n.d.	n.d.	n.d.	PEG		n.d.	n.d.
LOC_Os06g45000	Persistent PEG	No		n.d.	n.d.	n.d.	PEG		n.d.	n.d.
LOC_Os06g47290	n.d.	No		n.d.	n.d.	PEG	PEG		n.d.	n.d.
LOC_Os06g35160	Persistent PEG	No		n.d.	n.d.	PEG	n.d.		n.d.	n.d.
LOC_Os06g47294	n.d.	Yes		n.d.	n.d.	PEG	n.d.		n.d.	n.d.
LOC_Os06g02028	Persistent PEG	No		n.d.	PEG	PEG	PEG		PEG	PEG
LOC_Os06g47830	3 DAP-specific PEGs	Yes		n.d.	n.d.	n.d.	n.d.		n.d.	n.d.
LOC_Os07g01460	3 DAP-specific PEGs	No		n.d.	n.d.	n.d.	n.d.		n.d.	n.d.
LOC_Os07g01940	7 DAP-specific PEGs	No		n.d.	n.d.	n.d.	n.d.		n.d.	n.d.
LOC_Os07g02280	5 DAP-specific PEGs	No		n.d.	n.d.	n.d.	n.d.		n.d.	n.d.
LOC_Os07g02290	3 DAP-specific PEGs	No		n.d.	n.d.	n.d.	n.d.		n.d.	n.d.
LOC_Os07g04220	3 or 7 DAP-specific PEGs	No		n.d.	n.d.	n.d.	n.d.		n.d.	n.d.
LOC_Os07g04330	n.d.	No		n.d.	n.d.	PEG	n.d.		n.d.	n.d.
LOC_Os07g04350	n.d.	No		n.d.	n.d.	PEG	n.d.		n.d.	n.d.
LOC_Os07g06610	n.d.	No		n.d.	n.d.	PEG	n.d.		n.d.	n.d.
LOC_Os06g08740	Persistent PEG	No		PEG	PEG	PEG	PEG		PEG	n.d.
LOC_Os07g06980	n.d.	No		n.d.	n.d.	n.d.	PEG		n.d.	n.d.
LOC_Os07g06980	Persistent PEG	No		n.d.	n.d.	n.d.	PEG		n.d.	n.d.
LOC_Os06g35530	n.d.	No		n.d.	PEG	PEG	PEG		PEG	n.d.
LOC_Os06g30060	Persistent PEG	No		n.d.	PEG	PEG	PEG		PEG	PEG
LOC_Os06g47290	Persistent PEG	No		n.d.	n.d.	PEG	PEG		n.d.	n.d.
LOC_Os06g40490	n.d.	No		PEG	PEG	PEG	PEG		PEG	PEG
LOC_Os07g12630	n.d.	No		n.d.	n.d.	n.d.	PEG		PEG	n.d.
LOC_Os07g12630	3 or 7 DAP-specific PEGs	No		n.d.	n.d.	n.d.	PEG		PEG	n.d.
LOC_Os07g17210	n.d.	No		n.d.	n.d.	PEG	n.d.		PEG	n.d.
LOC_Os07g06610	Persistent PEG	No		n.d.	n.d.	PEG	n.d.		n.d.	n.d.
LOC_Os07g17360	n.d.	No		n.d.	n.d.	PEG	n.d.		PEG	n.d.
LOC_Os06g35530	Persistent PEG	No		n.d.	PEG	PEG	PEG		PEG	n.d.
LOC_Os06g23460	Persistent PEG	No		PEG	PEG	PEG	n.d.		PEG	n.d.
LOC_Os06g42990	n.d.	No		PEG	PEG	PEG	PEG		PEG	PEG
LOC_Os07g17520	n.d.	No		n.d.	n.d.	n.d.	n.d.		n.d.	PEG
LOC_Os07g17520	5 DAP-specific PEGs	No		n.d.	n.d.	n.d.	n.d.		n.d.	PEG
LOC_Os07g17560	n.d.	No		n.d.	n.d.	PEG	n.d.		n.d.	n.d.
LOC_Os07g18610	3 DAP-specific PEGs	No		n.d.	n.d.	n.d.	n.d.		n.d.	n.d.
LOC_Os07g18670	3 DAP-specific PEGs	No		n.d.	n.d.	n.d.	n.d.		n.d.	n.d.
LOC_Os07g18710	n.d.	No		n.d.	n.d.	PEG	n.d.		n.d.	n.d.
LOC_Os07g18720	n.d.	No		n.d.	n.d.	PEG	PEG		n.d.	PEG
LOC_Os07g17210	Persistent PEG	No		n.d.	n.d.	PEG	n.d.		PEG	n.d.
LOC_Os07g27110	n.d.	No		n.d.	n.d.	PEG	PEG		n.d.	PEG
LOC_Os07g17360	7 DAP-specific PEGs	No		n.d.	n.d.	PEG	n.d.		PEG	n.d.
LOC_Os07g27150	n.d.	No		n.d.	n.d.	n.d.	n.d.		PEG	n.d.
LOC_Os07g27150	5 DAP-specific PEGs	No		n.d.	n.d.	n.d.	n.d.		PEG	n.d.
LOC_Os06g40490	Persistent PEG	No		PEG	PEG	PEG	PEG		PEG	PEG
LOC_Os07g12490	n.d.	No		PEG	PEG	PEG	PEG		PEG	PEG
LOC_Os07g27430	3 DAP-specific PEGs	No		n.d.	n.d.	n.d.	n.d.		n.d.	n.d.
LOC_Os07g27450	Persistent PEG	Yes		n.d.	n.d.	n.d.	n.d.		n.d.	n.d.
LOC_Os07g32412	n.d.	No		n.d.	n.d.	n.d.	PEG		n.d.	n.d.
LOC_Os07g32412	3 or 7 DAP-specific PEGs	No		n.d.	n.d.	n.d.	PEG		n.d.	n.d.
LOC_Os07g32450	7 DAP-specific PEGs	No		n.d.	n.d.	n.d.	n.d.		n.d.	n.d.
LOC_Os07g32774	n.d.	No		n.d.	n.d.	PEG	n.d.		n.d.	n.d.
LOC_Os07g18720	Persistent PEG	No		n.d.	n.d.	PEG	PEG		n.d.	PEG
LOC_Os07g38080	n.d.	No		n.d.	n.d.	n.d.	PEG		n.d.	n.d.
LOC_Os07g38080	7 DAP-specific PEGs	No		n.d.	n.d.	n.d.	PEG		n.d.	n.d.
LOC_Os07g39400	3 DAP-specific PEGs	No		n.d.	n.d.	n.d.	n.d.		n.d.	n.d.
LOC_Os07g40040	n.d.	Yes		n.d.	n.d.	PEG	n.d.		n.d.	n.d.
LOC_Os07g12510	n.d.	No		n.d.	PEG	n.d.	n.d.		n.d.	n.d.
LOC_Os07g41160	n.d.	No		PEG	n.d.	PEG	PEG		n.d.	n.d.
LOC_Os07g41240	3 DAP-specific PEGs	No		n.d.	n.d.	n.d.	n.d.		n.d.	n.d.
LOC_Os07g42180	3 DAP-specific PEGs	No		n.d.	n.d.	n.d.	n.d.		n.d.	n.d.
LOC_Os07g42390	Persistent MEG	No		n.d.	n.d.	PEG	n.d.		MEG	n.d.
LOC_Os07g42760	n.d.	No		n.d.	n.d.	n.d.	PEG		n.d.	n.d.
LOC_Os07g42760	3 DAP-specific PEGs	No		n.d.	n.d.	n.d.	PEG		n.d.	n.d.
LOC_Os07g12510	7 DAP-specific PEGs	No		n.d.	PEG	n.d.	n.d.		n.d.	n.d.
LOC_Os07g27110	Persistent PEG	No		n.d.	n.d.	PEG	PEG		n.d.	PEG
LOC_Os07g43160	Persistent PEG	No		n.d.	n.d.	n.d.	n.d.		n.d.	n.d.
LOC_Os07g44840	n.d.	No		n.d.	n.d.	n.d.	PEG		n.d.	n.d.
LOC_Os07g45064	3 or 5 DAP-specific PEGs	No		n.d.	n.d.	n.d.	n.d.		n.d.	n.d.
LOC_Os07g45070	n.d.	No		n.d.	n.d.	PEG	n.d.		n.d.	n.d.
LOC_Os06g42990	3 or 5 DAP-specific PEGs	No		PEG	PEG	PEG	PEG		PEG	PEG
LOC_Os07g45400	n.d.	No		n.d.	n.d.	PEG	n.d.		PEG	PEG
LOC_Os07g32774	Persistent PEG	No		n.d.	n.d.	PEG	n.d.		n.d.	n.d.
LOC_Os07g48160	5 or 7 DAP-specific PEGs	Yes		n.d.	n.d.	n.d.	n.d.		n.d.	n.d.
LOC_Os07g48170	n.d.	No		n.d.	n.d.	PEG	n.d.		PEG	PEG
LOC_Os07g12490	Persistent PEG	No		PEG	PEG	PEG	PEG		PEG	PEG
LOC_Os07g48180	5 or 7 DAP-specific PEGs	Yes		n.d.	n.d.	n.d.	n.d.		n.d.	n.d.
LOC_Os07g48200	n.d.	No		n.d.	n.d.	n.d.	PEG		n.d.	n.d.
LOC_Os07g48229	7 DAP-specific PEGs	No		n.d.	n.d.	n.d.	n.d.		n.d.	n.d.
LOC_Os07g48260	n.d.	No		n.d.	n.d.	n.d.	n.d.		n.d.	PEG
LOC_Os07g48260	3 DAP-specific PEGs	No		n.d.	n.d.	n.d.	n.d.		n.d.	PEG
LOC_Os07g49460	5 DAP-specific PEGs	No		n.d.	n.d.	n.d.	n.d.		n.d.	n.d.
LOC_Os07g17460	n.d.	No		PEG	PEG	PEG	PEG		PEG	PEG
LOC_Os07g45070	Persistent PEG	No		n.d.	n.d.	PEG	n.d.		n.d.	n.d.
LOC_Os07g45400	Persistent PEG	No		n.d.	n.d.	PEG	n.d.		PEG	PEG
LOC_Os07g27300	n.d.	No		PEG	PEG	PEG	PEG		PEG	n.d.
LOC_Os08g01680	n.d.	No		n.d.	n.d.	PEG	n.d.		n.d.	n.d.
LOC_Os07g48170	Persistent PEG	No		n.d.	n.d.	PEG	n.d.		PEG	PEG
LOC_Os08g01690	n.d.	No		n.d.	n.d.	PEG	n.d.		n.d.	n.d.
LOC_Os08g01900	7 DAP-specific PEGs	No		n.d.	n.d.	n.d.	n.d.		n.d.	n.d.
LOC_Os08g02690	n.d.	No		n.d.	n.d.	n.d.	PEG		n.d.	n.d.
LOC_Os08g06420	3 or 5 DAP-specific PEGs	No		n.d.	n.d.	n.d.	n.d.		n.d.	n.d.
LOC_Os08g08000	n.d.	No		n.d.	n.d.	PEG	PEG		n.d.	PEG
LOC_Os07g17460	Persistent PEG	No		PEG	PEG	PEG	PEG		PEG	PEG
LOC_Os08g09570	3 DAP-specific PEGs	No		n.d.	n.d.	n.d.	n.d.		n.d.	n.d.
LOC_Os08g12750	5 or 7 DAP-specific PEGs	No		n.d.	n.d.	n.d.	n.d.		n.d.	n.d.
LOC_Os08g13110	Persistent PEG	No		n.d.	n.d.	n.d.	n.d.		n.d.	n.d.
LOC_Os08g13130	3 DAP-specific PEGs	No		n.d.	n.d.	n.d.	n.d.		n.d.	n.d.
LOC_Os08g13350	n.d.	No		n.d.	n.d.	PEG	PEG		PEG	PEG
LOC_Os07g41160	3 or 5 DAP-specific PEGs	No		PEG	n.d.	PEG	PEG		n.d.	n.d.
LOC_Os08g24400	n.d.	No		n.d.	n.d.	PEG	PEG		n.d.	PEG
LOC_Os08g01680	3 or 5 DAP-specific PEGs	No		n.d.	n.d.	PEG	n.d.		n.d.	n.d.
LOC_Os08g08000	Persistent PEG	No		n.d.	n.d.	PEG	PEG		n.d.	PEG
LOC_Os08g01054	n.d.	No		PEG	PEG	PEG	PEG		PEG	PEG
LOC_Os08g24946	7 DAP-specific PEGs	No		n.d.	n.d.	n.d.	n.d.		n.d.	n.d.
LOC_Os08g25640	n.d.	No		n.d.	n.d.	n.d.	PEG		n.d.	n.d.
LOC_Os08g13350	Persistent PEG	No		n.d.	n.d.	PEG	PEG		PEG	PEG
LOC_Os08g27240	n.d.	No		PEG	n.d.	PEG	PEG		n.d.	PEG
LOC_Os08g27860	n.d.	No		n.d.	n.d.	PEG	n.d.		n.d.	n.d.
LOC_Os08g24400	Persistent PEG	No		n.d.	n.d.	PEG	PEG		n.d.	PEG
LOC_Os08g29520	5 or 7 DAP-specific PEGs	No		n.d.	n.d.	n.d.	n.d.		n.d.	n.d.
LOC_Os08g33390	5 DAP-specific PEGs	No		n.d.	n.d.	n.d.	n.d.		n.d.	n.d.
LOC_Os08g35000	5 DAP-specific PEGs	Yes		n.d.	n.d.	n.d.	n.d.		n.d.	n.d.
LOC_Os08g35050	n.d.	Yes		n.d.	n.d.	PEG	PEG		n.d.	PEG
LOC_Os07g27300	Persistent PEG	No		PEG	PEG	PEG	PEG		PEG	n.d.
LOC_Os08g40620	n.d.	No		n.d.	n.d.	PEG	PEG		PEG	n.d.
LOC_Os08g01054	Persistent PEG	No		PEG	PEG	PEG	PEG		PEG	PEG
LOC_Os08g40820	Persistent PEG	No		n.d.	n.d.	n.d.	n.d.		n.d.	n.d.
LOC_Os08g41030	n.d.	Yes		n.d.	n.d.	n.d.	PEG		n.d.	n.d.
LOC_Os08g24420	n.d.	No		PEG	PEG	PEG	PEG		PEG	PEG
LOC_Os08g27860	Persistent PEG	No		n.d.	n.d.	PEG	n.d.		n.d.	n.d.
LOC_Os08g40620	Persistent PEG	No		n.d.	n.d.	PEG	PEG		PEG	n.d.
LOC_Os08g41700	n.d.	No		n.d.	PEG	PEG	PEG		PEG	PEG
LOC_Os08g41790	n.d.	No		n.d.	n.d.	PEG	PEG		PEG	n.d.
LOC_Os08g24420	Persistent PEG	No		PEG	PEG	PEG	PEG		PEG	PEG
LOC_Os08g42640	Persistent PEG	No		n.d.	n.d.	n.d.	n.d.		n.d.	n.d.
LOC_Os08g42980	n.d.	No		n.d.	n.d.	PEG	PEG		PEG	PEG
LOC_Os08g27240	Persistent PEG	No		PEG	n.d.	PEG	PEG		n.d.	PEG
LOC_Os08g43380	n.d.	No		n.d.	n.d.	n.d.	PEG		PEG	n.d.
LOC_Os08g43380	3 DAP-specific PEGs	No		n.d.	n.d.	n.d.	PEG		PEG	n.d.
LOC_Os08g41790	Persistent PEG	No		n.d.	n.d.	PEG	PEG		PEG	n.d.
LOC_Os08g44860	n.d.	No		PEG	n.d.	PEG	PEG		n.d.	n.d.
LOC_Os08g45130	n.d.	No		n.d.	n.d.	PEG	PEG		n.d.	n.d.
LOC_Os08g42980	Persistent PEG	No		n.d.	n.d.	PEG	PEG		PEG	PEG
LOC_Os09g02780	3 DAP-specific PEGs	No		n.d.	n.d.	n.d.	n.d.		n.d.	n.d.
LOC_Os09g02790	3 DAP-specific PEGs	No		n.d.	n.d.	n.d.	n.d.		n.d.	n.d.
LOC_Os09g03080	3 DAP-specific PEGs	No		n.d.	n.d.	n.d.	n.d.		n.d.	n.d.
LOC_Os08g41700	Persistent PEG	No		n.d.	PEG	PEG	PEG		PEG	PEG
LOC_Os09g03090	n.d.	No		PEG	n.d.	n.d.	PEG		PEG	PEG
LOC_Os09g03630	3 DAP-specific PEGs	No		n.d.	n.d.	n.d.	n.d.		n.d.	n.d.
LOC_Os09g06230	7 DAP-specific PEGs	No		n.d.	n.d.	n.d.	n.d.		n.d.	n.d.
LOC_Os09g03090	Persistent PEG	No		PEG	n.d.	n.d.	PEG		PEG	PEG
LOC_Os09g11760	n.d.	No		n.d.	n.d.	n.d.	PEG		n.d.	n.d.
LOC_Os09g11760	5 or 7 DAP-specific PEGs	No		n.d.	n.d.	n.d.	PEG		n.d.	n.d.
LOC_Os08g41710	n.d.	No		PEG	PEG	PEG	PEG		PEG	PEG
LOC_Os08g45130	Persistent PEG	No		n.d.	n.d.	PEG	PEG		n.d.	n.d.
LOC_Os09g16520	n.d.	Yes		n.d.	n.d.	PEG	n.d.		n.d.	n.d.
LOC_Os08g44860	5 DAP-specific PEGs	No		PEG	n.d.	PEG	PEG		n.d.	n.d.
LOC_Os09g20010	n.d.	No		n.d.	n.d.	PEG	PEG		PEG	n.d.
LOC_Os08g41710	Persistent PEG	No		PEG	PEG	PEG	PEG		PEG	PEG
LOC_Os09g20340	Persistent PEG	No		n.d.	n.d.	n.d.	n.d.		n.d.	n.d.
LOC_Os09g11160	n.d.	No		PEG	n.d.	n.d.	n.d.		n.d.	n.d.
LOC_Os09g14680	n.d.	No		n.d.	PEG	PEG	n.d.		n.d.	n.d.
LOC_Os09g23690	Persistent PEG	No		n.d.	n.d.	n.d.	n.d.		n.d.	n.d.
LOC_Os09g23720	n.d.	No		n.d.	n.d.	PEG	n.d.		n.d.	n.d.
LOC_Os09g20010	Persistent PEG	No		n.d.	n.d.	PEG	PEG		PEG	n.d.
LOC_Os09g23720	5 DAP-specific PEGs	No		n.d.	n.d.	PEG	n.d.		n.d.	n.d.
LOC_Os09g20650	n.d.	No		PEG	PEG	PEG	PEG		PEG	PEG
LOC_Os09g29050	3 DAP-specific PEGs	No		n.d.	n.d.	n.d.	n.d.		n.d.	n.d.
LOC_Os09g32540	3 or 5 DAP-specific PEGs	Yes		n.d.	n.d.	n.d.	n.d.		n.d.	n.d.
LOC_Os09g32750	Persistent PEG	No		n.d.	n.d.	n.d.	n.d.		n.d.	n.d.
LOC_Os09g34950	Persistent PEG	No		n.d.	n.d.	n.d.	n.d.		n.d.	n.d.
LOC_Os09g35830	7 DAP-specific PEGs	Yes		n.d.	n.d.	n.d.	n.d.		n.d.	n.d.
LOC_Os09g35850	Persistent PEG	No		n.d.	n.d.	n.d.	n.d.		n.d.	n.d.
LOC_Os09g38268	3 DAP-specific PEGs	No		n.d.	n.d.	n.d.	n.d.		n.d.	n.d.
LOC_Os09g38400	n.d.	No		n.d.	n.d.	n.d.	n.d.		PEG	n.d.
LOC_Os09g14680	Persistent PEG	No		n.d.	PEG	PEG	n.d.		n.d.	n.d.
LOC_Os09g28940	n.d.	No		PEG	PEG	PEG	n.d.		PEG	PEG
LOC_Os10g04600	7 DAP-specific PEGs	No		n.d.	n.d.	n.d.	n.d.		n.d.	n.d.
LOC_Os10g01480	n.d.	No		n.d.	PEG	PEG	PEG		PEG	PEG
LOC_Os09g20650	Persistent PEG	No		PEG	PEG	PEG	PEG		PEG	PEG
LOC_Os10g04860	3 DAP-specific PEGs	No		n.d.	n.d.	n.d.	n.d.		n.d.	n.d.
LOC_Os10g04610	n.d.	No		n.d.	PEG	n.d.	PEG		n.d.	n.d.
LOC_Os10g04890	n.d.	No		PEG	n.d.	PEG	PEG		PEG	PEG
LOC_Os10g04610	7 DAP-specific PEGs	No		n.d.	PEG	n.d.	PEG		n.d.	n.d.
LOC_Os10g01480	Persistent PEG	No		n.d.	PEG	PEG	PEG		PEG	PEG
LOC_Os09g28940	Persistent PEG	No		PEG	PEG	PEG	n.d.		PEG	PEG
LOC_Os10g04900	n.d.	No		n.d.	PEG	PEG	PEG		PEG	PEG
LOC_Os10g05500	n.d.	No		n.d.	n.d.	PEG	PEG		n.d.	PEG
LOC_Os10g04890	Persistent PEG	No		PEG	n.d.	PEG	PEG		PEG	PEG
LOC_Os10g05500	Persistent PEG	No		n.d.	n.d.	PEG	PEG		n.d.	PEG
LOC_Os10g05520	n.d.	No		PEG	n.d.	PEG	n.d.		PEG	PEG
LOC_Os10g05530	n.d.	No		n.d.	n.d.	n.d.	PEG		n.d.	n.d.
LOC_Os10g05530	7 DAP-specific PEGs	No		n.d.	n.d.	n.d.	PEG		n.d.	n.d.
LOC_Os10g05540	3 DAP-specific PEGs	No		n.d.	n.d.	n.d.	n.d.		n.d.	n.d.
LOC_Os10g05800	3 or 7 DAP-specific PEGs	No		n.d.	n.d.	n.d.	n.d.		n.d.	n.d.
LOC_Os10g11034	5 DAP-specific PEGs	No		n.d.	n.d.	n.d.	n.d.		n.d.	n.d.
LOC_Os10g11260	n.d.	No		n.d.	n.d.	PEG	PEG		n.d.	n.d.
LOC_Os10g04900	5 or 7 DAP-specific PEGs	No		n.d.	PEG	PEG	PEG		PEG	PEG
LOC_Os10g19860	3 DAP-specific PEGs	No		n.d.	n.d.	n.d.	n.d.		n.d.	n.d.
LOC_Os10g20960	3 DAP-specific PEGs	No		n.d.	n.d.	n.d.	n.d.		n.d.	n.d.
LOC_Os10g21810	5 DAP-specific PEGs	No		n.d.	n.d.	n.d.	n.d.		n.d.	n.d.
LOC_Os10g26520	3 or 7 DAP-specific PEGs	No		n.d.	n.d.	n.d.	n.d.		n.d.	n.d.
LOC_Os10g28360	7 DAP-specific PEGs	No		n.d.	n.d.	n.d.	n.d.		n.d.	n.d.
LOC_Os10g29549	n.d.	No		n.d.	n.d.	n.d.	PEG		PEG	n.d.
LOC_Os10g29549	3 DAP-specific MEGs	No		n.d.	n.d.	n.d.	PEG		PEG	n.d.
LOC_Os10g29549	7 DAP-specific PEGs	No		n.d.	n.d.	n.d.	PEG		PEG	n.d.
LOC_Os10g33930	3 or 7 DAP-specific PEGs	No		n.d.	n.d.	n.d.	n.d.		n.d.	n.d.
LOC_Os10g11260	Persistent PEG	No		n.d.	n.d.	PEG	PEG		n.d.	n.d.
LOC_Os10g35220	n.d.	No		n.d.	n.d.	PEG	n.d.		n.d.	n.d.
LOC_Os10g05520	Persistent PEG	No		PEG	n.d.	PEG	n.d.		PEG	PEG
LOC_Os10g36710	n.d.	No		n.d.	n.d.	PEG	PEG		PEG	PEG
LOC_Os10g35220	Persistent PEG	No		n.d.	n.d.	PEG	n.d.		n.d.	n.d.
LOC_Os10g04980	n.d.	No		PEG	PEG	PEG	PEG		PEG	PEG
LOC_Os10g36710	Persistent PEG	No		n.d.	n.d.	PEG	PEG		PEG	PEG
LOC_Os10g37540	n.d.	No		n.d.	PEG	PEG	n.d.		n.d.	PEG
LOC_Os10g04980	Persistent PEG	No		PEG	PEG	PEG	PEG		PEG	PEG
LOC_Os10g41360	n.d.	No		n.d.	n.d.	PEG	PEG		PEG	PEG
LOC_Os10g41370	n.d.	No		n.d.	n.d.	PEG	PEG		PEG	n.d.
LOC_Os10g37540	Persistent PEG	No		n.d.	PEG	PEG	n.d.		n.d.	PEG
LOC_Os10g39780	n.d.	No		PEG	PEG	PEG	PEG		PEG	PEG
LOC_Os10g41370	5 DAP-specific PEGs	No		n.d.	n.d.	PEG	PEG		PEG	n.d.
LOC_Os10g42700	n.d.	Yes		n.d.	n.d.	PEG	n.d.		n.d.	n.d.
LOC_Os11g03900	3 DAP-specific PEGs	No		n.d.	n.d.	n.d.	n.d.		n.d.	n.d.
LOC_Os11g05010	n.d.	No		n.d.	n.d.	PEG	n.d.		n.d.	n.d.
LOC_Os10g39780	Persistent PEG	No		PEG	PEG	PEG	PEG		PEG	PEG
LOC_Os11g06070	3 DAP-specific PEGs	No		n.d.	n.d.	n.d.	n.d.		n.d.	n.d.
LOC_Os11g06580	n.d.	No		n.d.	n.d.	PEG	PEG		n.d.	n.d.
LOC_Os11g05010	Persistent PEG	No		n.d.	n.d.	PEG	n.d.		n.d.	n.d.
LOC_Os11g07910	n.d.	No		PEG	PEG	PEG	PEG		PEG	PEG
LOC_Os11g06580	Persistent PEG	No		n.d.	n.d.	PEG	PEG		n.d.	n.d.
LOC_Os11g08410	3 DAP-specific PEGs	No		n.d.	n.d.	n.d.	n.d.		n.d.	n.d.
LOC_Os11g09160	7 DAP-specific PEGs	No		n.d.	n.d.	n.d.	n.d.		n.d.	n.d.
LOC_Os11g09329	n.d.	No		PEG	n.d.	n.d.	n.d.		n.d.	n.d.
LOC_Os11g09329	3 or 7 DAP-specific PEGs	No		PEG	n.d.	n.d.	n.d.		n.d.	n.d.
LOC_Os11g10060	3 DAP-specific PEGs	No		n.d.	n.d.	n.d.	n.d.		n.d.	n.d.
LOC_Os11g10070	3 DAP-specific PEGs	No		n.d.	n.d.	n.d.	n.d.		n.d.	n.d.
LOC_Os11g13694	n.d.	No		n.d.	n.d.	PEG	n.d.		n.d.	n.d.
LOC_Os11g07910	Persistent PEG	No		PEG	PEG	PEG	PEG		PEG	PEG
LOC_Os11g14300	n.d.	No		n.d.	n.d.	n.d.	PEG		n.d.	n.d.
LOC_Os11g14300	7 DAP-specific PEGs	No		n.d.	n.d.	n.d.	PEG		n.d.	n.d.
LOC_Os11g18170	3 DAP-specific PEGs	No		n.d.	n.d.	n.d.	n.d.		n.d.	n.d.
LOC_Os11g30790	7 DAP-specific PEGs	No		n.d.	n.d.	n.d.	n.d.		n.d.	n.d.
LOC_Os11g31330	n.d.	Yes		n.d.	n.d.	PEG	PEG		n.d.	PEG
LOC_Os11g13694	5 or 7 DAP-specific PEGs	No		n.d.	n.d.	PEG	n.d.		n.d.	n.d.
LOC_Os11g31340	n.d.	No		n.d.	n.d.	PEG	PEG		n.d.	PEG
LOC_Os11g31340	Persistent PEG	No		n.d.	n.d.	PEG	PEG		n.d.	PEG
LOC_Os11g31360	n.d.	No		n.d.	n.d.	PEG	PEG		n.d.	PEG
LOC_Os11g31360	Persistent PEG	No		n.d.	n.d.	PEG	PEG		n.d.	PEG
LOC_Os11g31380	n.d.	No		n.d.	n.d.	PEG	PEG		n.d.	PEG
LOC_Os11g31380	Persistent PEG	No		n.d.	n.d.	PEG	PEG		n.d.	PEG
LOC_Os11g31500	5 DAP-specific PEGs	No		n.d.	n.d.	n.d.	n.d.		n.d.	n.d.
LOC_Os11g34190	n.d.	No		n.d.	n.d.	n.d.	PEG		n.d.	n.d.
LOC_Os11g34190	Persistent PEG	No		n.d.	n.d.	n.d.	PEG		n.d.	n.d.
LOC_Os11g36470	Persistent PEG	No		n.d.	n.d.	n.d.	n.d.		n.d.	n.d.
LOC_Os11g37230	n.d.	No		n.d.	n.d.	n.d.	n.d.		PEG	n.d.
LOC_Os11g37230	3 DAP-specific PEGs	No		n.d.	n.d.	n.d.	n.d.		PEG	n.d.
LOC_Os11g37520	n.d.	No		n.d.	PEG	PEG	PEG		PEG	n.d.
LOC_Os11g37520	Persistent PEG	No		n.d.	PEG	PEG	PEG		PEG	n.d.
LOC_Os11g37890	n.d.	No		n.d.	PEG	PEG	n.d.		PEG	n.d.
LOC_Os11g37890	Persistent PEG	No		n.d.	PEG	PEG	n.d.		PEG	n.d.
LOC_Os11g38900	n.d.	No		n.d.	PEG	PEG	PEG		PEG	PEG
LOC_Os11g38900	Persistent PEG	No		n.d.	PEG	PEG	PEG		PEG	PEG
LOC_Os11g38980	n.d.	No		n.d.	PEG	PEG	PEG		PEG	PEG
LOC_Os11g38980	Persistent PEG	No		n.d.	PEG	PEG	PEG		PEG	PEG
LOC_Os11g45590	n.d.	No		n.d.	n.d.	n.d.	PEG		n.d.	n.d.
LOC_Os11g45590	5 or 7 DAP-specific PEGs	No		n.d.	n.d.	n.d.	PEG		n.d.	n.d.
LOC_Os12g02130	3 DAP-specific PEGs	No		n.d.	n.d.	n.d.	n.d.		n.d.	n.d.
LOC_Os12g02280	3 DAP-specific PEGs	No		n.d.	n.d.	n.d.	n.d.		n.d.	n.d.
LOC_Os12g02440	n.d.	No		n.d.	PEG	PEG	n.d.		n.d.	PEG
LOC_Os12g02440	Persistent PEG	No		n.d.	PEG	PEG	n.d.		n.d.	PEG
LOC_Os12g05040	n.d.	No		PEG	n.d.	PEG	PEG		n.d.	PEG
LOC_Os12g05040	Persistent PEG	No		PEG	n.d.	PEG	PEG		n.d.	PEG
LOC_Os12g06180	Persistent PEG	No		n.d.	n.d.	n.d.	n.d.		n.d.	n.d.
LOC_Os12g06190	n.d.	No		n.d.	n.d.	PEG	n.d.		n.d.	n.d.
LOC_Os12g06190	5 DAP-specific PEGs	No		n.d.	n.d.	PEG	n.d.		n.d.	n.d.
LOC_Os12g06630	n.d.	No		n.d.	n.d.	n.d.	PEG		n.d.	n.d.
LOC_Os12g06630	3 or 5 DAP-specific PEGs	No		n.d.	n.d.	n.d.	PEG		n.d.	n.d.
LOC_Os12g06640	n.d.	No		n.d.	n.d.	n.d.	PEG		n.d.	n.d.
LOC_Os12g07120	n.d.	No		n.d.	n.d.	PEG	PEG		n.d.	n.d.
LOC_Os12g07120	Persistent PEG	No		n.d.	n.d.	PEG	PEG		n.d.	n.d.
LOC_Os12g08720	n.d.	Yes		n.d.	n.d.	PEG	PEG		n.d.	n.d.
LOC_Os12g08780	n.d.	No		PEG	PEG	PEG	PEG		PEG	n.d.
LOC_Os12g08780	Persistent PEG	No		PEG	PEG	PEG	PEG		PEG	n.d.
LOC_Os12g08810	n.d.	No		n.d.	n.d.	n.d.	n.d.		PEG	n.d.
LOC_Os12g08810	3 DAP-specific PEGs	No		n.d.	n.d.	n.d.	n.d.		PEG	n.d.
LOC_Os12g18810	3 or 7 DAP-specific PEGs	No		n.d.	n.d.	n.d.	n.d.		n.d.	n.d.
LOC_Os12g18860	n.d.	No		n.d.	n.d.	PEG	n.d.		PEG	n.d.
LOC_Os12g18860	3 DAP-specific PEGs	No		n.d.	n.d.	PEG	n.d.		PEG	n.d.
LOC_Os12g19290	n.d.	No		n.d.	n.d.	PEG	n.d.		n.d.	n.d.
LOC_Os12g19290	Persistent PEG	No		n.d.	n.d.	PEG	n.d.		n.d.	n.d.
LOC_Os12g31350	n.d.	No		PEG	PEG	PEG	PEG		PEG	PEG
LOC_Os12g31350	Persistent PEG	No		PEG	PEG	PEG	PEG		PEG	PEG
LOC_Os12g32050	3 DAP-specific PEGs	No		n.d.	n.d.	n.d.	n.d.		n.d.	n.d.
LOC_Os12g32060	n.d.	No		n.d.	n.d.	PEG	n.d.		n.d.	n.d.
LOC_Os12g32060	Persistent PEG	No		n.d.	n.d.	PEG	n.d.		n.d.	n.d.
LOC_Os12g32080	n.d.	No		n.d.	PEG	PEG	n.d.		n.d.	PEG
LOC_Os12g32080	Persistent PEG	No		n.d.	PEG	PEG	n.d.		n.d.	PEG
LOC_Os12g32150	n.d.	No		PEG	PEG	PEG	PEG		PEG	PEG
LOC_Os12g32150	Persistent PEG	No		PEG	PEG	PEG	PEG		PEG	PEG
LOC_Os12g32170	n.d.	No		PEG	n.d.	n.d.	PEG		n.d.	PEG
LOC_Os12g32170	Persistent PEG	No		PEG	n.d.	n.d.	PEG		n.d.	PEG
LOC_Os12g32180	n.d.	No		n.d.	PEG	PEG	PEG		PEG	PEG
LOC_Os12g32180	Persistent PEG	No		n.d.	PEG	PEG	PEG		PEG	PEG
LOC_Os12g32250	Persistent PEG	No		n.d.	n.d.	n.d.	n.d.		n.d.	n.d.
LOC_Os12g32630	7 DAP-specific PEGs	No		n.d.	n.d.	n.d.	n.d.		n.d.	n.d.
LOC_Os12g36180	7 DAP-specific PEGs	No		n.d.	n.d.	n.d.	n.d.		n.d.	n.d.
LOC_Os12g36720	7 DAP-specific PEGs	No		n.d.	n.d.	n.d.	n.d.		n.d.	n.d.
LOC_Os12g36810	n.d.	Yes		n.d.	n.d.	PEG	n.d.		n.d.	n.d.
LOC_Os12g36950	n.d.	No		PEG	n.d.	PEG	n.d.		n.d.	n.d.
LOC_Os12g36950	Persistent PEG	No		PEG	n.d.	PEG	n.d.		n.d.	n.d.
LOC_Os12g37860	n.d.	No		PEG	n.d.	PEG	PEG		PEG	PEG
LOC_Os12g37860	Persistent PEG	No		PEG	n.d.	PEG	PEG		PEG	PEG
LOC_Os12g38580	3 or 5 DAP-specific PEGs	No		n.d.	n.d.	n.d.	n.d.		n.d.	n.d.
LOC_Os12g38590	n.d.	No		n.d.	MEG	MEG	PEG		MEG	n.d.
LOC_Os12g38590	n.d.	No		n.d.	MEG	MEG	PEG		MEG	n.d.
LOC_Os12g38590	Persistent PEG	No		n.d.	MEG	MEG	PEG		MEG	n.d.
LOC_Os12g39420	n.d.	No		n.d.	n.d.	PEG	PEG		n.d.	PEG
LOC_Os12g39420	Persistent PEG	No		n.d.	n.d.	PEG	PEG		n.d.	PEG
LOC_Os12g39640	n.d.	Yes		n.d.	n.d.	n.d.	PEG		n.d.	n.d.
LOC_Os12g39660	3 DAP-specific PEGs	No		n.d.	n.d.	n.d.	n.d.		n.d.	n.d.
LOC_Os12g40190	Persistent PEG	No		n.d.	n.d.	n.d.	n.d.		n.d.	n.d.
LOC_Os12g40510	n.d.	No		n.d.	n.d.	PEG	PEG		n.d.	n.d.
LOC_Os12g40510	Persistent PEG	No		n.d.	n.d.	PEG	PEG		n.d.	n.d.
LOC_Os12g40520	n.d.	No		PEG	PEG	PEG	PEG		PEG	PEG
LOC_Os12g40520	Persistent PEG	No		PEG	PEG	PEG	PEG		PEG	PEG
LOC_Os12g41956	3 or 5 DAP-specific PEGs	Yes		n.d.	n.d.	n.d.	n.d.		n.d.	n.d.
LOC_Os12g42300	n.d.	No		n.d.	n.d.	PEG	n.d.		n.d.	n.d.
LOC_Os12g42300	7 DAP-specific PEGs	No		n.d.	n.d.	PEG	n.d.		n.d.	n.d.
LOC_Os12g42310	n.d.	No		n.d.	PEG	PEG	PEG		PEG	PEG
LOC_Os12g42310	Persistent PEG	No		n.d.	PEG	PEG	PEG		PEG	PEG
