# Supplementary material for: Multi-layered epigenetic control of persistent and stage-specific imprinted genes in rice endosperm
Source: Research Square preprint supplement (doi:10.21203/rs.3.rs-2403620/v1), 2023-01-11
Supplement: Supplementary file 13 [file Supplementary Data 5.xlsx]

## Sheet: CG DMRs in Nip-Kas
Supplementary Data 5. List of differential methylated regions between parental alleles in F1 endosperm.
chromosome	start	end	Comparison between parental allele
			Maternal - Paternal allele	difference of methylation levels
1	196300	196900	hypo-methylation	-0.773906
1	207300	207800	hypo-methylation	-0.920033
1	239600	240200	hypo-methylation	-0.64376
1	414400	414900	hypo-methylation	-0.706141
1	424600	425600	hypo-methylation	-0.840894
1	428700	429100	hypo-methylation	-0.775275
1	438800	439100	hypo-methylation	-0.428243
1	462500	462800	hypo-methylation	-0.429391
1	464400	464800	hypo-methylation	-0.43775
1	532900	533500	hypo-methylation	-0.715996
1	550100	550500	hypo-methylation	-0.729042
1	575900	576100	hypo-methylation	-0.355187
1	587800	588500	hypo-methylation	-0.664784
1	846400	846800	hypo-methylation	-0.956715
1	1044900	1045200	hypo-methylation	-0.631791
1	1065100	1065400	hypo-methylation	-0.399062
1	1103100	1103500	hypo-methylation	-0.71033
1	1177800	1178300	hypo-methylation	-0.6846
1	1542000	1542200	hypo-methylation	-0.469842
1	1547000	1547500	hypo-methylation	-0.366243
1	1548600	1549100	hypo-methylation	-0.409593
1	1607800	1608100	hypo-methylation	-0.504406
1	1648200	1648400	hypo-methylation	-0.631506
1	1662300	1662800	hypo-methylation	-0.780988
1	1704200	1704900	hypo-methylation	-0.375462
1	1732600	1733100	hypo-methylation	-0.357535
1	1734200	1734700	hypo-methylation	-0.627459
1	1735400	1736000	hypo-methylation	-0.639304
1	1752200	1752800	hypo-methylation	-0.489707
1	1784100	1784500	hypo-methylation	-0.303741
1	1796700	1797400	hypo-methylation	-0.820354
1	1800000	1800600	hypo-methylation	-0.704746
1	1845600	1846100	hypo-methylation	-0.801858
1	1850900	1851400	hypo-methylation	-0.708943
1	1853000	1853500	hypo-methylation	-0.548125
1	1896600	1897100	hypo-methylation	-0.597792
1	1911300	1912100	hypo-methylation	-0.755543
1	1936700	1936800	hypo-methylation	-0.45982
1	1950800	1951500	hypo-methylation	-0.464551
1	2000800	2001200	hyper-methylation	0.445544
1	2001400	2001900	hypo-methylation	-0.739726
1	2040600	2041000	hypo-methylation	-0.547521
1	2049600	2050200	hypo-methylation	-0.5775
1	2070500	2070800	hypo-methylation	-0.412204
1	2132600	2133600	hypo-methylation	-0.839989
1	2148900	2149400	hypo-methylation	-0.764392
1	2150100	2150400	hypo-methylation	-0.367132
1	2151600	2152300	hypo-methylation	-0.858286
1	2161500	2161700	hypo-methylation	-0.756256
1	2161800	2162000	hypo-methylation	-0.657875
1	2163200	2163800	hypo-methylation	-0.664509
1	2165300	2165500	hypo-methylation	-0.516199
1	2176700	2177100	hypo-methylation	-0.619587
1	2223200	2223500	hypo-methylation	-0.432037
1	2225300	2225600	hypo-methylation	-0.491567
1	2225800	2226400	hypo-methylation	-0.80499
1	2249300	2249900	hypo-methylation	-0.329066
1	2249300	2249900	hypo-methylation	-0.350017
1	2249300	2249900	hyper-methylation	0.301633
1	2352500	2352900	hypo-methylation	-0.690356
1	2405400	2405800	hypo-methylation	-0.510804
1	2575800	2576300	hypo-methylation	-0.720023
1	2620100	2620400	hypo-methylation	-0.518487
1	2634600	2634900	hypo-methylation	-0.756263
1	2635700	2636300	hypo-methylation	-0.94799
1	2636500	2637200	hypo-methylation	-0.926396
1	2640700	2641200	hypo-methylation	-0.460275
1	2647400	2647800	hypo-methylation	-0.271767
1	2654300	2654900	hypo-methylation	-0.605478
1	2675400	2675900	hypo-methylation	-0.795384
1	2695600	2696100	hypo-methylation	-0.770892
1	2701800	2702200	hypo-methylation	-0.6306
1	2709900	2710200	hypo-methylation	-0.429598
1	2742400	2742700	hypo-methylation	-0.393398
1	2760300	2760700	hypo-methylation	-0.325667
1	2839100	2839700	hypo-methylation	-0.788363
1	2868000	2868500	hypo-methylation	-0.716711
1	2869000	2869700	hypo-methylation	-0.636094
1	2869900	2870400	hypo-methylation	-0.841007
1	2879400	2879500	hypo-methylation	-0.831101
1	2896400	2896900	hypo-methylation	-0.56214
1	2898600	2898900	hypo-methylation	-0.523218
1	2905100	2905400	hypo-methylation	-0.765467
1	2925200	2926000	hypo-methylation	-0.59394
1	2926400	2926900	hypo-methylation	-0.321225
1	2929000	2929600	hypo-methylation	-0.399267
1	2930400	2930700	hypo-methylation	-0.50649
1	2969500	2969600	hypo-methylation	-0.565183
1	2981600	2982000	hypo-methylation	-0.479231
1	3042900	3043400	hypo-methylation	-0.904692
1	3053500	3053900	hypo-methylation	-0.475313
1	3106100	3106700	hypo-methylation	-0.756881
1	3122200	3122700	hypo-methylation	-0.500692
1	3472200	3472700	hypo-methylation	-0.426619
1	3482700	3483000	hypo-methylation	-0.329175
1	3495400	3495800	hypo-methylation	-0.377295
1	3512600	3513100	hypo-methylation	-0.313133
1	3560900	3561100	hypo-methylation	-0.353291
1	3630900	3631400	hypo-methylation	-0.774919
1	3693000	3693300	hypo-methylation	-0.308532
1	3693400	3693700	hypo-methylation	-0.426645
1	3701100	3701400	hypo-methylation	-0.717053
1	3702000	3702400	hypo-methylation	-0.8522
1	3703300	3703600	hypo-methylation	-0.388012
1	3786300	3787000	hypo-methylation	-0.924275
1	3825300	3825800	hypo-methylation	-0.959994
1	3856600	3857000	hypo-methylation	-0.374591
1	3861100	3861400	hypo-methylation	-0.715393
1	3899200	3899300	hypo-methylation	-0.328846
1	4016600	4017200	hypo-methylation	-0.823365
1	4019400	4020100	hypo-methylation	-0.402425
1	4023900	4024200	hypo-methylation	-0.375611
1	4070300	4070400	hypo-methylation	-0.802554
1	4072900	4073200	hypo-methylation	-0.302592
1	4073800	4074300	hypo-methylation	-0.592452
1	4084400	4085700	hypo-methylation	-0.595819
1	4086400	4087100	hypo-methylation	-0.699002
1	4087200	4087700	hypo-methylation	-0.501104
1	4097300	4097500	hypo-methylation	-0.742536
1	4124200	4124900	hypo-methylation	-0.871308
1	4128600	4129100	hypo-methylation	-0.76444
1	4130800	4131000	hypo-methylation	-0.614082
1	4134400	4134700	hypo-methylation	-0.796466
1	4134900	4135200	hypo-methylation	-0.958413
1	4141400	4142100	hypo-methylation	-0.935752
1	4155200	4155700	hypo-methylation	-0.386989
1	4156600	4156900	hypo-methylation	-0.500506
1	4183000	4183400	hyper-methylation	0.36965
1	4211400	4212300	hypo-methylation	-0.847255
1	4218400	4218700	hypo-methylation	-0.388487
1	4220300	4220800	hypo-methylation	-0.432837
1	4221000	4221200	hypo-methylation	-0.390578
1	4223100	4223600	hypo-methylation	-0.575632
1	4226900	4227500	hypo-methylation	-0.656553
1	4228700	4229300	hypo-methylation	-0.661737
1	4232100	4232400	hypo-methylation	-0.431782
1	4238000	4238300	hypo-methylation	-0.392606
1	4252200	4252900	hypo-methylation	-0.535774
1	4252200	4252900	hyper-methylation	0.394892
1	4255300	4255500	hypo-methylation	-0.474731
1	4258300	4259000	hypo-methylation	-0.534125
1	4259700	4260300	hypo-methylation	-0.659735
1	4261100	4261400	hypo-methylation	-0.79129
1	4262700	4262800	hypo-methylation	-0.345119
1	4263000	4263200	hypo-methylation	-0.384944
1	4268000	4268600	hypo-methylation	-0.948551
1	4270400	4271200	hypo-methylation	-0.93059
1	4277600	4278000	hypo-methylation	-0.286713
1	4296600	4296900	hypo-methylation	-0.450111
1	4297000	4297600	hypo-methylation	-0.502555
1	4304900	4305300	hypo-methylation	-0.446376
1	4306100	4306600	hypo-methylation	-0.775499
1	4310800	4311300	hypo-methylation	-0.447042
1	4314300	4314700	hypo-methylation	-0.907766
1	4315800	4316300	hypo-methylation	-0.635174
1	4319000	4319400	hypo-methylation	-0.867878
1	4324600	4324800	hypo-methylation	-0.416496
1	4336900	4337500	hypo-methylation	-0.693937
1	4339100	4339900	hypo-methylation	-0.429217
1	4344400	4344700	hypo-methylation	-0.368884
1	4378800	4379200	hypo-methylation	-0.492475
1	4389400	4389800	hypo-methylation	-0.592537
1	4443300	4443600	hypo-methylation	-0.486364
1	4498800	4499400	hypo-methylation	-0.854672
1	4500500	4501000	hypo-methylation	-0.9747
1	4533200	4533700	hypo-methylation	-0.443616
1	4569100	4569600	hypo-methylation	-0.354854
1	4573700	4573800	hypo-methylation	-0.36106
1	4574000	4574200	hypo-methylation	-0.409397
1	4589100	4589300	hypo-methylation	-0.540968
1	4590100	4590600	hypo-methylation	-0.560744
1	4634900	4635300	hypo-methylation	-0.44005
1	4645200	4645700	hypo-methylation	-0.796694
1	4650700	4651100	hypo-methylation	-0.341372
1	4674500	4674900	hypo-methylation	-0.771867
1	4677200	4677600	hypo-methylation	-0.935887
1	4682900	4683500	hypo-methylation	-0.920983
1	4695700	4696300	hypo-methylation	-0.478629
1	4702700	4703200	hypo-methylation	-0.72158
1	4703500	4704000	hypo-methylation	-0.535947
1	4711600	4712000	hypo-methylation	-0.72255
1	4712600	4712900	hypo-methylation	-0.60525
1	4719500	4719600	hypo-methylation	-0.380846
1	4719800	4720000	hypo-methylation	-0.396196
1	4738000	4738300	hypo-methylation	-0.591886
1	4746300	4746900	hypo-methylation	-0.673388
1	4772200	4772700	hypo-methylation	-0.94392
1	4799700	4800100	hypo-methylation	-0.562612
1	4810300	4810700	hypo-methylation	-0.595109
1	4849800	4850600	hypo-methylation	-0.477506
1	4849800	4850600	hypo-methylation	-0.602636
1	4849800	4850600	hypo-methylation	-0.622281
1	4849800	4850600	hypo-methylation	-0.747411
1	4870800	4871100	hypo-methylation	-0.425552
1	4874500	4874700	hypo-methylation	-0.359475
1	4920300	4920600	hypo-methylation	-0.34386
1	5005700	5006200	hypo-methylation	-0.796575
1	5006400	5006900	hypo-methylation	-0.691525
1	5023300	5023700	hypo-methylation	-0.887879
1	5024600	5025100	hypo-methylation	-0.664125
1	5044800	5045900	hypo-methylation	-0.508552
1	5092600	5093100	hypo-methylation	-0.734208
1	5139500	5140100	hypo-methylation	-0.691031
1	5145700	5146000	hypo-methylation	-0.50287
1	5162000	5162200	hypo-methylation	-0.375456
1	5168900	5169400	hypo-methylation	-0.59065
1	5187900	5188400	hypo-methylation	-0.368479
1	5189800	5190400	hypo-methylation	-0.468979
1	5194900	5195400	hypo-methylation	-0.431717
1	5196600	5197600	hypo-methylation	-0.572307
1	5207700	5208000	hypo-methylation	-0.442089
1	5211800	5212200	hypo-methylation	-0.852609
1	5213400	5213900	hypo-methylation	-0.377042
1	5267000	5267300	hypo-methylation	-0.608781
1	5342900	5343400	hypo-methylation	-0.503323
1	5377400	5377800	hypo-methylation	-0.468313
1	5394900	5395400	hypo-methylation	-0.4798
1	5431900	5432200	hypo-methylation	-0.411809
1	5436300	5436700	hypo-methylation	-0.396759
1	5500800	5501300	hypo-methylation	-0.438271
1	5515700	5517900	hypo-methylation	-0.911272
1	5521500	5521900	hypo-methylation	-0.42748
1	5522300	5522900	hypo-methylation	-0.410416
1	5526900	5527500	hypo-methylation	-0.909663
1	5527600	5527700	hypo-methylation	-0.745734
1	5531300	5532500	hypo-methylation	-0.875387
1	5534000	5534200	hypo-methylation	-0.492102
1	5535800	5536200	hypo-methylation	-0.614314
1	5536700	5536900	hypo-methylation	-0.721103
1	5537300	5537800	hypo-methylation	-0.656539
1	5545300	5546000	hypo-methylation	-0.871885
1	5547900	5548400	hypo-methylation	-0.650875
1	5549100	5549400	hypo-methylation	-0.645841
1	5552300	5552500	hypo-methylation	-0.592927
1	5576200	5576700	hypo-methylation	-0.864634
1	5577400	5578200	hypo-methylation	-0.852244
1	5578300	5578500	hypo-methylation	-0.815894
1	5586800	5587500	hypo-methylation	-0.727151
1	5588100	5588400	hypo-methylation	-0.590176
1	5588600	5589000	hypo-methylation	-0.725985
1	5589300	5589800	hypo-methylation	-0.882417
1	5600200	5600700	hypo-methylation	-0.653203
1	5601100	5602200	hypo-methylation	-0.686074
1	5604800	5605300	hypo-methylation	-0.767583
1	5605700	5606200	hypo-methylation	-0.745208
1	5625200	5625600	hypo-methylation	-0.440085
1	5626800	5627700	hypo-methylation	-0.820012
1	5627800	5628400	hypo-methylation	-0.764989
1	5631900	5632300	hypo-methylation	-0.491586
1	5633600	5634000	hypo-methylation	-0.674673
1	5635900	5636300	hypo-methylation	-0.469135
1	5636400	5636600	hypo-methylation	-0.549281
1	5644500	5645000	hypo-methylation	-0.43841
1	5649200	5649300	hypo-methylation	-0.318381
1	5654300	5654800	hypo-methylation	-0.30915
1	5656600	5657100	hypo-methylation	-0.528593
1	5661900	5662700	hypo-methylation	-0.599388
1	5675000	5675500	hypo-methylation	-0.783691
1	5685200	5685500	hypo-methylation	-0.276475
1	5691100	5691600	hypo-methylation	-0.748269
1	5693400	5693900	hypo-methylation	-0.56808
1	5852800	5853300	hypo-methylation	-0.809752
1	5853900	5854200	hypo-methylation	-0.740109
1	5858300	5859000	hypo-methylation	-0.535625
1	5859900	5860100	hypo-methylation	-0.419375
1	5919300	5919600	hypo-methylation	-0.494605
1	5956500	5957000	hypo-methylation	-0.558442
1	5970600	5971000	hypo-methylation	-0.308291
1	5972900	5973300	hypo-methylation	-0.395977
1	6144600	6145100	hypo-methylation	-0.671799
1	6169500	6170000	hypo-methylation	-0.354341
1	6190000	6190800	hypo-methylation	-0.599378
1	6191100	6191600	hypo-methylation	-0.582298
1	6194700	6195400	hypo-methylation	-0.6188
1	6215000	6215500	hypo-methylation	-0.766459
1	6229100	6229300	hypo-methylation	-0.2601
1	6237700	6238500	hypo-methylation	-0.340771
1	6245200	6245700	hypo-methylation	-0.543597
1	6285300	6286100	hypo-methylation	-0.440225
1	6295300	6295600	hypo-methylation	-0.456651
1	6323600	6324000	hypo-methylation	-0.468761
1	6332300	6333100	hypo-methylation	-0.77724
1	6334400	6334500	hypo-methylation	-0.709248
1	6334600	6334800	hypo-methylation	-0.59126
1	6341600	6341900	hyper-methylation	0.499125
1	6359200	6359800	hypo-methylation	-0.817649
1	6438900	6439700	hypo-methylation	-0.816628
1	6441400	6441800	hypo-methylation	-0.688593
1	6456900	6457200	hypo-methylation	-0.606038
1	6458200	6458700	hypo-methylation	-0.564051
1	6468000	6468600	hypo-methylation	-0.609229
1	6488800	6489400	hypo-methylation	-0.750819
1	6498000	6498100	hypo-methylation	-0.411064
1	6513100	6513300	hypo-methylation	-0.328025
1	6540000	6540300	hypo-methylation	-0.353875
1	6562400	6563000	hypo-methylation	-0.653683
1	6574800	6575300	hypo-methylation	-0.543423
1	6575700	6576200	hypo-methylation	-0.696667
1	6579900	6580400	hypo-methylation	-0.743579
1	6580900	6581300	hypo-methylation	-0.543346
1	6647300	6647400	hypo-methylation	-0.394346
1	6651100	6651600	hypo-methylation	-0.565492
1	6652100	6652300	hypo-methylation	-0.338359
1	6664500	6665000	hypo-methylation	-0.848233
1	6804400	6804700	hypo-methylation	-0.334684
1	6844100	6844200	hypo-methylation	-0.499748
1	6848700	6849100	hypo-methylation	-0.420466
1	6862400	6862800	hypo-methylation	-0.363454
1	6865600	6866100	hypo-methylation	-0.86029
1	6870900	6871200	hypo-methylation	-0.642034
1	6877300	6877500	hypo-methylation	-0.36445
1	6884800	6885500	hypo-methylation	-0.328106
1	6886300	6886900	hypo-methylation	-0.612281
1	6886300	6886900	hypo-methylation	-0.655631
1	6886300	6886900	hyper-methylation	0.623025
1	6897100	6897600	hypo-methylation	-0.384371
1	6915400	6915800	hypo-methylation	-0.564371
1	6916400	6916900	hypo-methylation	-0.807686
1	6965400	6965700	hypo-methylation	-0.610364
1	6968800	6969200	hypo-methylation	-0.858625
1	6980300	6980800	hypo-methylation	-0.712657
1	7013200	7013500	hypo-methylation	-0.250816
1	7018900	7019100	hypo-methylation	-0.358382
1	7019300	7019400	hypo-methylation	-0.33925
1	7034500	7035300	hypo-methylation	-0.716423
1	7052100	7052400	hypo-methylation	-0.428057
1	7062500	7063000	hypo-methylation	-0.551638
1	7090300	7091400	hypo-methylation	-0.577019
1	7137700	7138200	hypo-methylation	-0.487827
1	7140700	7141400	hypo-methylation	-0.659844
1	7147900	7148400	hypo-methylation	-0.814935
1	7153800	7154800	hypo-methylation	-0.7317
1	7156000	7156400	hypo-methylation	-0.381301
1	7165800	7166000	hypo-methylation	-0.649908
1	7169200	7170200	hypo-methylation	-0.814996
1	7171800	7172300	hypo-methylation	-0.847657
1	7172600	7173100	hypo-methylation	-0.843015
1	7177800	7178000	hypo-methylation	-0.446937
1	7186100	7186500	hypo-methylation	-0.443729
1	7198100	7198600	hypo-methylation	-0.825521
1	7207100	7207400	hypo-methylation	-0.287712
1	7219900	7220200	hypo-methylation	-0.363422
1	7234100	7234300	hypo-methylation	-0.339213
1	7237000	7237300	hypo-methylation	-0.272844
1	7247400	7247900	hypo-methylation	-0.494292
1	7248500	7248600	hypo-methylation	-0.411652
1	7252800	7253100	hypo-methylation	-0.6901
1	7255400	7255600	hypo-methylation	-0.6981
1	7287100	7287300	hypo-methylation	-0.348
1	7295900	7296400	hypo-methylation	-0.816418
1	7311000	7311500	hypo-methylation	-0.649088
1	7311800	7312200	hypo-methylation	-0.469772
1	7312600	7313000	hypo-methylation	-0.40795
1	7312600	7313000	hypo-methylation	-0.43916
1	7313500	7314200	hypo-methylation	-0.446446
1	7313500	7314200	hypo-methylation	-0.477656
1	7314600	7314800	hypo-methylation	-0.484959
1	7317400	7317700	hypo-methylation	-0.411548
1	7355300	7355600	hypo-methylation	-0.465009
1	7357600	7358100	hypo-methylation	-0.544815
1	7360700	7360900	hypo-methylation	-0.329758
1	7366700	7367000	hypo-methylation	-0.701067
1	7396000	7396400	hypo-methylation	-0.384136
1	7413400	7413900	hypo-methylation	-0.484895
1	7444200	7444800	hypo-methylation	-0.599309
1	7445500	7445900	hypo-methylation	-0.372631
1	7447100	7447600	hypo-methylation	-0.697696
1	7448400	7449100	hypo-methylation	-0.854929
1	7454400	7454900	hypo-methylation	-0.827323
1	7455200	7455500	hypo-methylation	-0.819165
1	7461100	7461200	hypo-methylation	-0.695194
1	7462900	7463500	hypo-methylation	-0.839981
1	7469200	7469800	hypo-methylation	-0.735734
1	7484500	7484900	hypo-methylation	-0.847573
1	7498700	7499200	hypo-methylation	-0.895798
1	7501000	7502000	hypo-methylation	-0.900795
1	7505600	7506200	hypo-methylation	-0.745928
1	7515100	7515400	hypo-methylation	-0.436389
1	7535500	7536000	hypo-methylation	-0.700608
1	7543600	7544000	hypo-methylation	-0.824248
1	7553000	7553200	hypo-methylation	-0.338454
1	7554500	7555200	hypo-methylation	-0.534406
1	7564700	7565200	hypo-methylation	-0.410367
1	7565300	7565500	hypo-methylation	-0.398033
1	7568600	7569100	hypo-methylation	-0.552407
1	7570100	7570200	hypo-methylation	-0.565797
1	7574700	7574800	hypo-methylation	-0.642613
1	7575300	7576400	hypo-methylation	-0.677649
1	7584400	7585000	hypo-methylation	-0.594671
1	7585800	7586200	hypo-methylation	-0.377915
1	7593900	7594300	hypo-methylation	-0.673918
1	7600100	7600700	hypo-methylation	-0.549071
1	7600800	7601300	hypo-methylation	-0.617842
1	7601500	7602000	hypo-methylation	-0.747891
1	7609200	7609800	hypo-methylation	-0.745706
1	7615500	7615800	hypo-methylation	-0.836593
1	7616000	7616900	hypo-methylation	-0.688937
1	7617500	7618000	hypo-methylation	-0.585215
1	7618800	7619000	hypo-methylation	-0.383841
1	7624700	7625200	hypo-methylation	-0.666442
1	7626200	7626500	hypo-methylation	-0.524061
1	7629800	7630300	hypo-methylation	-0.622464
1	7654500	7655000	hypo-methylation	-0.628673
1	7671400	7672100	hypo-methylation	-0.64689
1	7698500	7699500	hypo-methylation	-0.77896
1	7699900	7700300	hypo-methylation	-0.46715
1	7712900	7713600	hypo-methylation	-0.767164
1	7713900	7714400	hypo-methylation	-0.861509
1	7719300	7719800	hypo-methylation	-0.864179
1	7738200	7738700	hypo-methylation	-0.617439
1	7768800	7769100	hypo-methylation	-0.260279
1	7798400	7798900	hypo-methylation	-0.353083
1	7800300	7801200	hypo-methylation	-0.640904
1	7811400	7813900	hypo-methylation	-0.767563
1	7815000	7815500	hypo-methylation	-0.377991
1	7818700	7819200	hypo-methylation	-0.424923
1	7822500	7822700	hypo-methylation	-0.366554
1	7839900	7840100	hypo-methylation	-0.800463
1	7843500	7843900	hypo-methylation	-0.319666
1	7844600	7845100	hypo-methylation	-0.543917
1	7853600	7854200	hypo-methylation	-0.541771
1	7858900	7859300	hypo-methylation	-0.726542
1	7887700	7888200	hypo-methylation	-0.712975
1	7888700	7890000	hypo-methylation	-0.645276
1	7890500	7891300	hypo-methylation	-0.731361
1	7907100	7907500	hypo-methylation	-0.419393
1	7914700	7915000	hypo-methylation	-0.736884
1	7915100	7915200	hypo-methylation	-0.664676
1	7923500	7923700	hypo-methylation	-0.368565
1	7979000	7979600	hypo-methylation	-0.600664
1	7983000	7983300	hypo-methylation	-0.325167
1	7983500	7984100	hypo-methylation	-0.53993
1	8060000	8060500	hypo-methylation	-0.803057
1	8067100	8067500	hypo-methylation	-0.731912
1	8117700	8118200	hypo-methylation	-0.648066
1	8118400	8119400	hypo-methylation	-0.727721
1	8120300	8120700	hypo-methylation	-0.789448
1	8123200	8123300	hypo-methylation	-0.345475
1	8136200	8136400	hypo-methylation	-0.375802
1	8149500	8150000	hypo-methylation	-0.845938
1	8157400	8157700	hypo-methylation	-0.361
1	8169900	8170200	hypo-methylation	-0.346866
1	8170900	8171300	hypo-methylation	-0.338938
1	8179000	8179300	hypo-methylation	-0.449829
1	8183100	8183700	hypo-methylation	-0.435385
1	8195000	8196000	hypo-methylation	-0.601244
1	8195000	8196000	hypo-methylation	-0.608394
1	8204600	8205300	hypo-methylation	-0.519821
1	8270900	8271300	hypo-methylation	-0.514475
1	8297300	8297400	hypo-methylation	-0.361198
1	8298500	8299000	hypo-methylation	-0.823241
1	8301400	8301700	hypo-methylation	-0.385234
1	8309600	8310000	hypo-methylation	-0.352268
1	8335300	8336300	hypo-methylation	-0.632551
1	8341900	8342300	hypo-methylation	-0.321837
1	8345900	8346300	hypo-methylation	-0.463803
1	8348700	8349200	hypo-methylation	-0.348625
1	8351200	8351700	hypo-methylation	-0.491675
1	8373400	8373700	hypo-methylation	-0.935858
1	8374200	8374600	hypo-methylation	-0.614923
1	8377400	8378200	hypo-methylation	-0.784037
1	8378600	8379000	hypo-methylation	-0.688992
1	8383200	8383600	hypo-methylation	-0.456741
1	8386500	8386800	hypo-methylation	-0.334275
1	8416200	8416700	hypo-methylation	-0.950929
1	8417300	8417700	hypo-methylation	-0.98578
1	8420200	8420700	hypo-methylation	-0.769333
1	8431100	8431600	hypo-methylation	-0.451025
1	8579500	8580000	hypo-methylation	-0.432744
1	8580600	8581200	hypo-methylation	-0.663777
1	8599900	8600400	hypo-methylation	-0.465721
1	8601400	8602000	hypo-methylation	-0.812338
1	8602800	8603300	hypo-methylation	-0.605687
1	8603600	8604000	hypo-methylation	-0.7747
1	8612600	8613100	hypo-methylation	-0.808305
1	8627000	8627600	hypo-methylation	-0.50307
1	8629900	8630400	hypo-methylation	-0.93424
1	8631100	8631600	hypo-methylation	-0.76615
1	8634000	8634600	hypo-methylation	-0.860832
1	8635400	8636000	hypo-methylation	-0.813404
1	8662400	8662900	hypo-methylation	-0.982325
1	8675900	8676500	hypo-methylation	-0.344657
1	8679600	8680100	hypo-methylation	-0.574996
1	8686400	8686900	hypo-methylation	-0.705775
1	8694200	8694300	hypo-methylation	-0.344083
1	8705900	8706600	hypo-methylation	-0.554103
1	8707200	8707700	hypo-methylation	-0.708217
1	8756600	8757000	hypo-methylation	-0.498905
1	8760700	8761200	hypo-methylation	-0.746258
1	8762000	8762500	hypo-methylation	-0.960114
1	8764900	8765200	hypo-methylation	-0.568941
1	8765800	8766300	hypo-methylation	-0.496034
1	8787600	8788000	hypo-methylation	-0.485615
1	8791400	8791600	hypo-methylation	-0.450856
1	8795300	8795900	hypo-methylation	-0.553335
1	8830200	8830500	hypo-methylation	-0.608341
1	8852300	8853100	hypo-methylation	-0.577327
1	8853700	8854300	hypo-methylation	-0.518146
1	8878300	8878800	hypo-methylation	-0.61336
1	9147500	9147800	hypo-methylation	-0.342475
1	9222500	9223100	hypo-methylation	-0.896273
1	9398200	9398400	hypo-methylation	-0.857603
1	9400600	9401100	hypo-methylation	-0.344653
1	9400600	9401100	hypo-methylation	-0.386578
1	9400600	9401100	hypo-methylation	-0.398852
1	9400600	9401100	hypo-methylation	-0.440777
1	9401600	9402100	hypo-methylation	-0.667992
1	9407600	9408000	hypo-methylation	-0.384147
1	9408300	9408800	hypo-methylation	-0.34962
1	9418400	9418600	hypo-methylation	-0.358067
1	9422800	9423100	hypo-methylation	-0.383513
1	9425700	9426100	hypo-methylation	-0.608613
1	9434400	9434800	hypo-methylation	-0.900694
1	9457500	9458100	hypo-methylation	-0.74701
1	9472500	9473100	hypo-methylation	-0.763199
1	9479000	9479500	hypo-methylation	-0.777459
1	9480000	9480200	hypo-methylation	-0.404525
1	9483900	9484200	hypo-methylation	-0.653029
1	9485600	9485900	hypo-methylation	-0.583775
1	9486600	9487400	hypo-methylation	-0.842283
1	9487800	9488300	hypo-methylation	-0.70462
1	9493400	9493600	hypo-methylation	-0.427296
1	9494300	9494600	hypo-methylation	-0.43933
1	9518200	9519000	hypo-methylation	-0.845212
1	9550500	9550900	hypo-methylation	-0.509104
1	9550500	9550900	hypo-methylation	-0.613854
1	9551100	9551300	hypo-methylation	-0.491754
1	9551100	9551300	hypo-methylation	-0.596504
1	9553500	9554000	hypo-methylation	-0.899828
1	9554200	9555200	hypo-methylation	-0.915653
1	9561400	9561700	hypo-methylation	-0.328191
1	9570400	9571600	hypo-methylation	-0.811164
1	9572600	9573100	hypo-methylation	-0.547161
1	9586700	9587000	hypo-methylation	-0.473375
1	9598700	9599300	hypo-methylation	-0.489918
1	9608700	9608900	hypo-methylation	-0.419567
1	9627000	9628200	hypo-methylation	-0.725295
1	9628600	9629000	hypo-methylation	-0.843743
1	9633200	9633600	hypo-methylation	-0.651037
1	9641200	9641700	hypo-methylation	-0.93562
1	9642400	9642900	hypo-methylation	-0.352492
1	9645900	9646400	hypo-methylation	-0.354075
1	9649700	9650100	hypo-methylation	-0.33104
1	9658900	9659400	hypo-methylation	-0.434471
1	9658900	9659400	hyper-methylation	0.3406
1	9662000	9662400	hypo-methylation	-0.744606
1	9663000	9665000	hypo-methylation	-0.755153
1	9671200	9671900	hypo-methylation	-0.633435
1	9672900	9673000	hypo-methylation	-0.908931
1	9676700	9677100	hypo-methylation	-0.680474
1	9677300	9678200	hypo-methylation	-0.740371
1	9686700	9687100	hypo-methylation	-0.962666
1	9717400	9717700	hypo-methylation	-0.4155
1	9725900	9726500	hypo-methylation	-0.740567
1	9732600	9733100	hypo-methylation	-0.665315
1	9763500	9764100	hypo-methylation	-0.648401
1	9764200	9765000	hypo-methylation	-0.491348
1	9766400	9766800	hypo-methylation	-0.520071
1	9769200	9769500	hypo-methylation	-0.2895
1	9774200	9775300	hypo-methylation	-0.690759
1	9775500	9775800	hypo-methylation	-0.380858
1	9776700	9777300	hypo-methylation	-0.570144
1	9779700	9779900	hypo-methylation	-0.40055
1	9783500	9783800	hypo-methylation	-0.544538
1	9784500	9785100	hypo-methylation	-0.71237
1	9798600	9799000	hypo-methylation	-0.48425
1	9802100	9802600	hypo-methylation	-0.873319
1	9802700	9803100	hypo-methylation	-0.931978
1	9807000	9807900	hypo-methylation	-0.680854
1	9811100	9811500	hypo-methylation	-0.239258
1	9820300	9820700	hypo-methylation	-0.919612
1	9829500	9831000	hypo-methylation	-0.493558
1	9852800	9853100	hypo-methylation	-0.286652
1	9855800	9856400	hypo-methylation	-0.666448
1	9856700	9856900	hypo-methylation	-0.485797
1	9870800	9871300	hypo-methylation	-0.547407
1	9871500	9871900	hypo-methylation	-0.483252
1	9875500	9875800	hypo-methylation	-0.69705
1	9877100	9878100	hypo-methylation	-0.773629
1	9879200	9879700	hypo-methylation	-0.761463
1	9880400	9881000	hypo-methylation	-0.959156
1	9881600	9882000	hypo-methylation	-0.721593
1	9887300	9887700	hypo-methylation	-0.450454
1	9895000	9895200	hypo-methylation	-0.628142
1	9895600	9895900	hypo-methylation	-0.245404
1	9898000	9898500	hypo-methylation	-0.733499
1	9907500	9908100	hypo-methylation	-0.51991
1	9911700	9912200	hypo-methylation	-0.346314
1	9917600	9918300	hypo-methylation	-0.680501
1	9923600	9924000	hypo-methylation	-0.57089
1	9930500	9931400	hypo-methylation	-0.747609
1	9933900	9934400	hypo-methylation	-0.943225
1	9975700	9976200	hypo-methylation	-0.475799
1	9988500	9989000	hypo-methylation	-0.56947
1	10007000	10007500	hypo-methylation	-0.7897
1	10018900	10019300	hypo-methylation	-0.587889
1	10027800	10028300	hypo-methylation	-0.660319
1	10044800	10045700	hypo-methylation	-0.511432
1	10055600	10056500	hypo-methylation	-0.671714
1	10064400	10065200	hypo-methylation	-0.744163
1	10104700	10105300	hypo-methylation	-0.720964
1	10106100	10106500	hypo-methylation	-0.65125
1	10107800	10108100	hypo-methylation	-0.352321
1	10128900	10129400	hypo-methylation	-0.821125
1	10130500	10130800	hypo-methylation	-0.476237
1	10146800	10147200	hypo-methylation	-0.526772
1	10192500	10192700	hypo-methylation	-0.529672
1	10192900	10193400	hypo-methylation	-0.386875
1	10223700	10224200	hypo-methylation	-0.446798
1	10224400	10225300	hypo-methylation	-0.574784
1	10227200	10228300	hypo-methylation	-0.931778
1	10238800	10239200	hypo-methylation	-0.388209
1	10284800	10285400	hypo-methylation	-0.801627
1	10285600	10285800	hypo-methylation	-0.483148
1	10286900	10287300	hypo-methylation	-0.330179
1	10290700	10291000	hypo-methylation	-0.617578
1	10292700	10293100	hypo-methylation	-0.813306
1	10317700	10318300	hypo-methylation	-0.639682
1	10329400	10330000	hypo-methylation	-0.307503
1	10330200	10330300	hypo-methylation	-0.35872
1	10335700	10336200	hypo-methylation	-0.365636
1	10343800	10344300	hypo-methylation	-0.438515
1	10350500	10350700	hypo-methylation	-0.903277
1	10350800	10351000	hypo-methylation	-0.746126
1	10356100	10356500	hypo-methylation	-0.568633
1	10361200	10361600	hypo-methylation	-0.615067
1	10363000	10363400	hypo-methylation	-0.828879
1	10364000	10364500	hypo-methylation	-0.704867
1	10364700	10365000	hypo-methylation	-0.489287
1	10371400	10373700	hypo-methylation	-0.736644
1	10375900	10376500	hypo-methylation	-0.414733
1	10375900	10376500	hypo-methylation	-0.432737
1	10401200	10401700	hypo-methylation	-0.490605
1	10468500	10469000	hypo-methylation	-0.505213
1	10475000	10475900	hypo-methylation	-0.59678
1	10476300	10477100	hypo-methylation	-0.528146
1	10477700	10478000	hypo-methylation	-0.319462
1	10479800	10480300	hypo-methylation	-0.309762
1	10484800	10485400	hypo-methylation	-0.734287
1	10491300	10491700	hypo-methylation	-0.395791
1	10506000	10506700	hypo-methylation	-0.726981
1	10537300	10537700	hypo-methylation	-0.370563
1	10551300	10551700	hypo-methylation	-0.577624
1	10566900	10567400	hypo-methylation	-0.859667
1	10578300	10578600	hypo-methylation	-0.739556
1	10583000	10583600	hypo-methylation	-0.685834
1	10588900	10589500	hypo-methylation	-0.531443
1	10602900	10603500	hypo-methylation	-0.431985
1	10612500	10613000	hypo-methylation	-0.457361
1	10616700	10618100	hypo-methylation	-0.800135
1	10619500	10619800	hypo-methylation	-0.466533
1	10622300	10622600	hypo-methylation	-0.405768
1	10629400	10630200	hypo-methylation	-0.918819
1	10661200	10661700	hypo-methylation	-0.624375
1	10669900	10670300	hypo-methylation	-0.407258
1	10715000	10715400	hypo-methylation	-0.392358
1	10814800	10815100	hypo-methylation	-0.391221
1	10835300	10835800	hypo-methylation	-0.73255
1	10837600	10837700	hypo-methylation	-0.404465
1	10838000	10838300	hypo-methylation	-0.385509
1	10841000	10841600	hypo-methylation	-0.308775
1	10850000	10850100	hypo-methylation	-0.282641
1	10886900	10887300	hypo-methylation	-0.69555
1	10906600	10907300	hypo-methylation	-0.47356
1	10916200	10917500	hypo-methylation	-0.755967
1	10925200	10925700	hypo-methylation	-0.684378
1	10937800	10938100	hypo-methylation	-0.417641
1	10938200	10938500	hypo-methylation	-0.493125
1	10940100	10940400	hypo-methylation	-0.480143
1	10947800	10947900	hypo-methylation	-0.28485
1	10957800	10958200	hypo-methylation	-0.496627
1	10957800	10958200	hypo-methylation	-0.553427
1	10959100	10959500	hypo-methylation	-0.820213
1	10963600	10964100	hypo-methylation	-0.572342
1	10967100	10967600	hypo-methylation	-0.841684
1	10990100	10990200	hypo-methylation	-0.757671
1	10990500	10990800	hypo-methylation	-0.881657
1	10994000	10995000	hypo-methylation	-0.849773
1	11014700	11015100	hypo-methylation	-0.497197
1	11019700	11020200	hypo-methylation	-0.564712
1	11022800	11023000	hypo-methylation	-0.569298
1	11030900	11032100	hypo-methylation	-0.849449
1	11034000	11034500	hypo-methylation	-0.9773
1	11037600	11038100	hypo-methylation	-0.668696
1	11039100	11039400	hypo-methylation	-0.374781
1	11042600	11042900	hypo-methylation	-0.325502
1	11043500	11044200	hypo-methylation	-0.787287
1	11044400	11044700	hypo-methylation	-0.564991
1	11051100	11051600	hypo-methylation	-0.684875
1	11052000	11052200	hypo-methylation	-0.332146
1	11053800	11054500	hypo-methylation	-0.531721
1	11209800	11210200	hypo-methylation	-0.368729
1	11464900	11465200	hypo-methylation	-0.467985
1	11474200	11474900	hypo-methylation	-0.628739
1	11476200	11476800	hypo-methylation	-0.687114
1	11514200	11514700	hypo-methylation	-0.588665
1	11517900	11518500	hypo-methylation	-0.47201
1	11530300	11530700	hypo-methylation	-0.701304
1	11542400	11542700	hypo-methylation	-0.4784
1	11546600	11547300	hypo-methylation	-0.713213
1	11547700	11548000	hypo-methylation	-0.291712
1	11547700	11548000	hypo-methylation	-0.360662
1	11547700	11548000	hyper-methylation	0.240937
1	11572300	11573400	hypo-methylation	-0.558002
1	11596700	11597200	hypo-methylation	-0.445813
1	11615300	11615900	hypo-methylation	-0.449597
1	11626900	11627400	hypo-methylation	-0.66105
1	11628500	11628800	hypo-methylation	-0.784168
1	11628900	11629400	hypo-methylation	-0.731251
1	11635000	11635600	hypo-methylation	-0.942422
1	11644200	11644700	hypo-methylation	-0.353241
1	11701600	11702000	hypo-methylation	-0.319065
1	11709300	11709700	hypo-methylation	-0.7076
1	11727300	11727800	hypo-methylation	-0.438823
1	11748200	11748300	hypo-methylation	-0.327929
1	11753500	11753800	hypo-methylation	-0.439233
1	11769800	11770200	hypo-methylation	-0.595525
1	11773500	11773800	hypo-methylation	-0.498804
1	11775200	11775400	hypo-methylation	-0.349816
1	11781100	11781600	hypo-methylation	-0.41419
1	11805700	11806200	hypo-methylation	-0.851271
1	11824700	11825100	hypo-methylation	-0.648467
1	11825200	11825800	hypo-methylation	-0.647504
1	11827800	11828400	hypo-methylation	-0.514239
1	11829000	11829800	hypo-methylation	-0.741201
1	11849500	11850000	hypo-methylation	-0.586109
1	11854600	11855000	hypo-methylation	-0.617417
1	11861000	11861500	hypo-methylation	-0.494262
1	11863100	11863600	hypo-methylation	-0.548095
1	11866600	11866800	hypo-methylation	-0.340745
1	11896800	11897300	hypo-methylation	-0.419942
1	11909400	11909900	hypo-methylation	-0.744492
1	11911800	11912400	hypo-methylation	-0.572442
1	11914300	11914600	hypo-methylation	-0.403153
1	11940200	11940300	hypo-methylation	-0.587077
1	11957200	11958100	hypo-methylation	-0.46112
1	11960300	11960900	hypo-methylation	-0.789352
1	11961300	11961800	hypo-methylation	-0.816912
1	11962000	11962500	hypo-methylation	-0.929462
1	11972500	11972800	hypo-methylation	-0.381434
1	11975000	11975900	hypo-methylation	-0.856059
1	11994500	11995200	hypo-methylation	-0.695622
1	11995400	11995700	hypo-methylation	-0.299737
1	12063400	12063800	hyper-methylation	0.409062
1	12070300	12070900	hypo-methylation	-0.671769
1	12071000	12071200	hypo-methylation	-0.519769
1	12071700	12072400	hypo-methylation	-0.663704
1	12072800	12073200	hypo-methylation	-0.607684
1	12076900	12077300	hypo-methylation	-0.426548
1	12077800	12078300	hypo-methylation	-0.605933
1	12079500	12079800	hyper-methylation	0.562225
1	12080000	12080500	hypo-methylation	-0.638305
1	12113700	12114000	hypo-methylation	-0.560926
1	12114100	12114600	hypo-methylation	-0.575918
1	12125400	12125600	hypo-methylation	-0.37968
1	12127900	12129200	hypo-methylation	-0.882559
1	12132000	12132500	hypo-methylation	-0.524176
1	12149000	12149600	hypo-methylation	-0.590148
1	12152600	12153500	hypo-methylation	-0.600874
1	12154900	12155700	hypo-methylation	-0.586201
1	12159100	12160100	hypo-methylation	-0.794733
1	12162300	12162800	hypo-methylation	-0.769406
1	12163000	12163800	hypo-methylation	-0.644514
1	12164200	12164800	hypo-methylation	-0.47692
1	12172400	12172900	hypo-methylation	-0.343836
1	12211100	12211900	hypo-methylation	-0.738218
1	12212400	12212800	hypo-methylation	-0.260467
1	12219800	12220000	hypo-methylation	-0.575623
1	12220200	12220300	hypo-methylation	-0.533667
1	12223500	12223600	hypo-methylation	-0.606546
1	12227900	12228000	hypo-methylation	-0.351309
1	12230000	12230400	hypo-methylation	-0.538925
1	12233000	12234000	hypo-methylation	-0.6952
1	12234100	12234800	hypo-methylation	-0.740384
1	12247100	12247500	hypo-methylation	-0.370182
1	12263700	12264600	hypo-methylation	-0.883154
1	12284600	12285100	hypo-methylation	-0.75515
1	12289000	12289500	hypo-methylation	-0.550104
1	12296700	12297000	hypo-methylation	-0.44237
1	12314400	12315200	hypo-methylation	-0.603793
1	12337100	12337500	hypo-methylation	-0.557197
1	12337600	12338100	hypo-methylation	-0.405747
1	12339200	12339600	hypo-methylation	-0.480621
1	12339900	12340700	hypo-methylation	-0.827096
1	12341100	12341600	hypo-methylation	-0.483025
1	12343100	12343400	hypo-methylation	-0.49238
1	12349100	12349600	hypo-methylation	-0.60485
1	12356400	12356700	hypo-methylation	-0.297365
1	12362900	12363500	hypo-methylation	-0.73793
1	12369000	12369300	hypo-methylation	-0.285925
1	12370600	12370900	hypo-methylation	-0.336021
1	12393200	12393800	hypo-methylation	-0.957776
1	12398300	12399400	hypo-methylation	-0.775003
1	12405200	12405500	hypo-methylation	-0.469689
1	12504000	12504500	hypo-methylation	-0.432816
1	12548300	12548600	hypo-methylation	-0.710908
1	12571100	12571600	hypo-methylation	-0.809959
1	12585200	12585700	hypo-methylation	-0.589603
1	12586100	12586200	hypo-methylation	-0.56706
1	12586600	12587000	hypo-methylation	-0.87365
1	12587700	12588100	hypo-methylation	-0.718601
1	12588500	12588800	hypo-methylation	-0.657784
1	12612200	12612800	hypo-methylation	-0.82913
1	12647500	12648000	hypo-methylation	-0.819708
1	12666300	12666800	hypo-methylation	-0.636113
1	12670600	12671200	hypo-methylation	-0.690956
1	12673800	12674400	hypo-methylation	-0.589728
1	12673800	12674400	hypo-methylation	-0.6393
1	12676700	12677100	hypo-methylation	-0.325373
1	12691400	12691900	hypo-methylation	-0.447408
1	12693400	12694000	hypo-methylation	-0.367163
1	12708300	12708700	hypo-methylation	-0.412937
1	12711400	12712400	hypo-methylation	-0.672181
1	12738000	12738500	hypo-methylation	-0.698047
1	12751000	12751500	hypo-methylation	-0.565538
1	12755800	12756700	hypo-methylation	-0.382622
1	12755800	12756700	hypo-methylation	-0.396105
1	12755800	12756700	hypo-methylation	-0.429739
1	12755800	12756700	hypo-methylation	-0.443222
1	12767500	12768000	hypo-methylation	-0.569807
1	12803400	12803700	hypo-methylation	-0.607996
1	12805700	12806100	hypo-methylation	-0.696447
1	12854900	12855200	hypo-methylation	-0.545843
1	12859900	12860200	hypo-methylation	-0.504047
1	12877100	12877600	hypo-methylation	-0.858033
1	12878800	12879000	hypo-methylation	-0.474376
1	12879100	12879600	hypo-methylation	-0.605836
1	12880900	12881300	hypo-methylation	-0.375761
1	12883900	12884500	hypo-methylation	-0.619903
1	12893300	12893600	hypo-methylation	-0.445416
1	12906200	12906500	hypo-methylation	-0.52725
1	12906900	12907300	hypo-methylation	-0.394513
1	12907500	12908000	hypo-methylation	-0.623779
1	12920000	12920500	hypo-methylation	-0.496908
1	12931600	12932200	hypo-methylation	-0.518389
1	12934500	12934600	hypo-methylation	-0.622317
1	12935300	12935600	hypo-methylation	-0.446409
1	12937500	12937700	hypo-methylation	-0.477021
1	12984500	12984800	hypo-methylation	-0.531896
1	13134900	13135200	hypo-methylation	-0.670478
1	13151500	13152200	hypo-methylation	-0.579545
1	13203100	13203900	hypo-methylation	-0.557856
1	13209700	13210000	hypo-methylation	-0.316366
1	13210600	13210700	hypo-methylation	-0.457169
1	13210800	13211700	hypo-methylation	-0.486325
1	13214900	13215400	hypo-methylation	-0.770456
1	13216000	13216600	hypo-methylation	-0.636412
1	13218300	13218800	hypo-methylation	-0.883159
1	13236300	13236800	hypo-methylation	-0.673218
1	13242200	13242400	hypo-methylation	-0.369673
1	13249500	13249900	hypo-methylation	-0.463871
1	13262500	13263800	hypo-methylation	-0.889858
1	13264000	13264700	hypo-methylation	-0.912227
1	13271300	13271800	hypo-methylation	-0.5133
1	13279600	13280100	hypo-methylation	-0.949317
1	13283200	13283300	hypo-methylation	-0.436408
1	13283400	13283900	hypo-methylation	-0.445425
1	13285100	13286100	hypo-methylation	-0.767886
1	13288000	13288100	hypo-methylation	-0.75205
1	13289200	13289600	hypo-methylation	-0.514045
1	13290200	13290700	hypo-methylation	-0.936543
1	13297900	13298400	hypo-methylation	-0.815862
1	13298600	13298900	hypo-methylation	-0.73243
1	13306300	13307100	hypo-methylation	-0.840259
1	13307800	13308100	hypo-methylation	-0.3558
1	13308600	13309600	hypo-methylation	-0.577048
1	13334100	13334500	hypo-methylation	-0.375385
1	13339500	13339900	hypo-methylation	-0.340223
1	13344600	13344900	hypo-methylation	-0.328642
1	13351200	13351700	hypo-methylation	-0.382217
1	13357900	13358500	hypo-methylation	-0.582928
1	13379200	13379500	hypo-methylation	-0.30194
1	13386900	13387000	hypo-methylation	-0.632321
1	13387800	13389300	hypo-methylation	-0.833759
1	13441500	13442000	hypo-methylation	-0.903736
1	13455600	13456000	hypo-methylation	-0.689011
1	13484100	13484600	hypo-methylation	-0.612996
1	13484800	13485700	hypo-methylation	-0.703657
1	13511500	13511800	hyper-methylation	0.621117
1	13514200	13514800	hypo-methylation	-0.778263
1	13518000	13518600	hypo-methylation	-0.540374
1	13528500	13529200	hypo-methylation	-0.548391
1	13550400	13550500	hypo-methylation	-0.590549
1	13550700	13551200	hypo-methylation	-0.788309
1	13570000	13570500	hypo-methylation	-0.560477
1	13785400	13785700	hypo-methylation	-0.953894
1	13786800	13787300	hypo-methylation	-0.451454
1	13788400	13788800	hypo-methylation	-0.929318
1	13789100	13789900	hypo-methylation	-0.889169
1	13790100	13790500	hypo-methylation	-0.407725
1	13802700	13803000	hypo-methylation	-0.442721
1	13821100	13821600	hypo-methylation	-0.563185
1	13893400	13894100	hypo-methylation	-0.732997
1	13895500	13896100	hypo-methylation	-0.666531
1	13930600	13931200	hypo-methylation	-0.715542
1	13943700	13944100	hypo-methylation	-0.497325
1	13985500	13985800	hypo-methylation	-0.405054
1	13993300	13993900	hypo-methylation	-0.619549
1	14011200	14012300	hypo-methylation	-0.698913
1	14014900	14015400	hypo-methylation	-0.833994
1	14015900	14016300	hypo-methylation	-0.851916
1	14032000	14032700	hypo-methylation	-0.520204
1	14033100	14033600	hypo-methylation	-0.614197
1	14034200	14034600	hypo-methylation	-0.719519
1	14050600	14051000	hypo-methylation	-0.8053
1	14056500	14057000	hypo-methylation	-0.541415
1	14057100	14058400	hypo-methylation	-0.703276
1	14067400	14068300	hypo-methylation	-0.472419
1	14155700	14156200	hypo-methylation	-0.47625
1	14157400	14158000	hypo-methylation	-0.616108
1	14164400	14164700	hypo-methylation	-0.562338
1	14166100	14166700	hypo-methylation	-0.763569
1	14227700	14228200	hypo-methylation	-0.735559
1	14264900	14265200	hypo-methylation	-0.547233
1	14306300	14307200	hypo-methylation	-0.669287
1	14309200	14309500	hypo-methylation	-0.684488
1	14314500	14314900	hypo-methylation	-0.607544
1	14333300	14333700	hypo-methylation	-0.619011
1	14334100	14334800	hypo-methylation	-0.710928
1	14358600	14359200	hypo-methylation	-0.707302
1	14360000	14360300	hypo-methylation	-0.44505
1	14361400	14361700	hypo-methylation	-0.604865
1	14362000	14362100	hypo-methylation	-0.728631
1	14362200	14362500	hypo-methylation	-0.761462
1	14381400	14381800	hypo-methylation	-0.649517
1	14383000	14383300	hypo-methylation	-0.434917
1	14396900	14397200	hypo-methylation	-0.879274
1	14401300	14401700	hypo-methylation	-0.604863
1	14405200	14405600	hypo-methylation	-0.341541
1	14412300	14412800	hypo-methylation	-0.587331
1	14414800	14415100	hypo-methylation	-0.550718
1	14417600	14417800	hypo-methylation	-0.467693
1	14418000	14418700	hypo-methylation	-0.671526
1	14419600	14419900	hypo-methylation	-0.473226
1	14420100	14421700	hypo-methylation	-0.745371
1	14422000	14422900	hypo-methylation	-0.741375
1	14423100	14423900	hypo-methylation	-0.854862
1	14424100	14426600	hypo-methylation	-0.879322
1	14426900	14427800	hypo-methylation	-0.834524
1	14428200	14429000	hypo-methylation	-0.843452
1	14429500	14430100	hypo-methylation	-0.934638
1	14430700	14431300	hypo-methylation	-0.791142
1	14431600	14432900	hypo-methylation	-0.84463
1	14433900	14434700	hypo-methylation	-0.654268
1	14435200	14435700	hypo-methylation	-0.483437
1	14440000	14440200	hypo-methylation	-0.491691
1	14440800	14441300	hypo-methylation	-0.659552
1	14447900	14448400	hypo-methylation	-0.848829
1	14448900	14449400	hypo-methylation	-0.729568
1	14455800	14456300	hypo-methylation	-0.601725
1	14461800	14462400	hypo-methylation	-0.57212
1	14464600	14465600	hypo-methylation	-0.822442
1	14487600	14488000	hypo-methylation	-0.496938
1	14488200	14488600	hypo-methylation	-0.605585
1	14506900	14507400	hypo-methylation	-0.405698
1	14510700	14510800	hypo-methylation	-0.635927
1	14511100	14511200	hypo-methylation	-0.599885
1	14549200	14549700	hypo-methylation	-0.603724
1	14608100	14608500	hypo-methylation	-0.371293
1	14628600	14629200	hypo-methylation	-0.7452
1	14635400	14635900	hypo-methylation	-0.899269
1	14636900	14637200	hypo-methylation	-0.484082
1	14637600	14638100	hypo-methylation	-0.806656
1	14674100	14674800	hypo-methylation	-0.795502
1	14749200	14749900	hypo-methylation	-0.733064
1	14751400	14751700	hypo-methylation	-0.262071
1	14790400	14790500	hypo-methylation	-0.625492
1	14792400	14792500	hypo-methylation	-0.699944
1	14808800	14809100	hypo-methylation	-0.407367
1	14811300	14811700	hypo-methylation	-0.802783
1	14821300	14821600	hypo-methylation	-0.286168
1	14857000	14857500	hypo-methylation	-0.753516
1	14904500	14905000	hypo-methylation	-0.826267
1	14927900	14928200	hypo-methylation	-0.581995
1	14938200	14938700	hypo-methylation	-0.464843
1	14938200	14938700	hypo-methylation	-0.475895
1	14945800	14946100	hypo-methylation	-0.694225
1	15013700	15014200	hypo-methylation	-0.772203
1	15014300	15014500	hypo-methylation	-0.818598
1	15020300	15020600	hypo-methylation	-0.445569
1	15026500	15026900	hypo-methylation	-0.425223
1	15032100	15032700	hypo-methylation	-0.834148
1	15057800	15058900	hypo-methylation	-0.719499
1	15072200	15072500	hypo-methylation	-0.947043
1	15072900	15073800	hypo-methylation	-0.519586
1	15074700	15074800	hypo-methylation	-0.498755
1	15075400	15075900	hypo-methylation	-0.714671
1	15085000	15085300	hypo-methylation	-0.333859
1	15097400	15097800	hypo-methylation	-0.752925
1	15098800	15099100	hypo-methylation	-0.427516
1	15125400	15125700	hypo-methylation	-0.414417
1	15142700	15142800	hypo-methylation	-0.556637
1	15142900	15143500	hypo-methylation	-0.617856
1	15145000	15146000	hypo-methylation	-0.945993
1	15188700	15189200	hypo-methylation	-0.751554
1	15189400	15189900	hypo-methylation	-0.563548
1	15190200	15190700	hypo-methylation	-0.544312
1	15359000	15359500	hypo-methylation	-0.655591
1	15383900	15384400	hypo-methylation	-0.969858
1	15408100	15408400	hypo-methylation	-0.474696
1	15425300	15425700	hypo-methylation	-0.467426
1	15482300	15483000	hypo-methylation	-0.958353
1	15483100	15483400	hypo-methylation	-0.960801
1	15484500	15485300	hypo-methylation	-0.864762
1	15486500	15487000	hypo-methylation	-0.857277
1	15511800	15512200	hypo-methylation	-0.692891
1	15516200	15516500	hypo-methylation	-0.279175
1	15516200	15516500	hypo-methylation	-0.286075
1	15575000	15575300	hypo-methylation	-0.877884
1	15575900	15576200	hypo-methylation	-0.619449
1	15618600	15619200	hyper-methylation	0.64665
1	15646100	15646500	hypo-methylation	-0.839704
1	15778500	15778800	hypo-methylation	-0.716366
1	15817300	15817700	hypo-methylation	-0.71429
1	15817800	15818300	hypo-methylation	-0.870096
1	15818700	15819100	hypo-methylation	-0.945866
1	15819800	15820300	hypo-methylation	-0.922526
1	15849300	15849800	hypo-methylation	-0.830348
1	15850000	15851500	hypo-methylation	-0.82396
1	15852100	15852700	hypo-methylation	-0.42879
1	15935600	15937500	hypo-methylation	-0.784654
1	15941300	15941700	hypo-methylation	-0.4733
1	15968100	15968300	hypo-methylation	-0.378059
1	15979000	15979700	hypo-methylation	-0.69974
1	16050500	16050900	hypo-methylation	-0.439213
1	16061300	16061700	hypo-methylation	-0.398921
1	16069900	16070900	hypo-methylation	-0.710218
1	16098100	16098400	hypo-methylation	-0.315654
1	16099500	16100500	hypo-methylation	-0.742408
1	16113000	16113500	hypo-methylation	-0.884484
1	16113900	16114000	hypo-methylation	-0.844193
1	16118600	16119100	hypo-methylation	-0.536996
1	16118600	16119100	hypo-methylation	-0.574327
1	16119300	16119500	hypo-methylation	-0.647357
1	16119300	16119500	hypo-methylation	-0.684688
1	16129500	16129700	hypo-methylation	-0.518525
1	16134300	16134800	hypo-methylation	-0.455875
1	16140800	16141600	hypo-methylation	-0.889549
1	16141900	16142200	hypo-methylation	-0.910356
1	16142900	16143000	hypo-methylation	-0.67006
1	16143200	16143900	hypo-methylation	-0.70798
1	16148700	16149100	hypo-methylation	-0.557748
1	16149500	16150400	hypo-methylation	-0.852363
1	16175900	16176100	hypo-methylation	-0.349346
1	16200000	16200500	hypo-methylation	-0.596083
1	16200000	16200500	hypo-methylation	-0.611766
1	16301500	16301800	hypo-methylation	-0.302287
1	16302900	16303100	hypo-methylation	-0.715167
1	16334000	16334100	hypo-methylation	-0.298638
1	16347200	16347700	hypo-methylation	-0.729593
1	16349600	16350100	hypo-methylation	-0.964441
1	16378800	16379300	hypo-methylation	-0.806825
1	16387800	16388000	hypo-methylation	-0.36355
1	16456500	16457000	hypo-methylation	-0.475365
1	16474200	16474800	hypo-methylation	-0.723177
1	16507800	16508700	hypo-methylation	-0.686875
1	16509800	16511000	hypo-methylation	-0.670429
1	16539200	16539700	hypo-methylation	-0.822032
1	16614300	16615000	hypo-methylation	-0.703165
1	16637300	16637600	hypo-methylation	-0.443554
1	16660600	16661500	hypo-methylation	-0.858245
1	16663000	16663500	hypo-methylation	-0.783484
1	16681400	16682500	hypo-methylation	-0.777043
1	16690500	16691000	hypo-methylation	-0.474607
1	16703000	16703500	hypo-methylation	-0.687947
1	16714200	16714400	hypo-methylation	-0.388591
1	16717900	16718000	hypo-methylation	-0.476942
1	17001900	17002200	hypo-methylation	-0.32735
1	17011800	17012300	hypo-methylation	-0.55626
1	17045300	17045700	hypo-methylation	-0.488129
1	17071500	17072400	hypo-methylation	-0.688379
1	17076300	17076800	hypo-methylation	-0.41227
1	17111200	17111800	hypo-methylation	-0.578464
1	17218800	17219500	hypo-methylation	-0.356646
1	17218800	17219500	hypo-methylation	-0.357846
1	17268700	17269100	hypo-methylation	-0.987362
1	17269400	17269900	hypo-methylation	-0.924633
1	17270400	17270600	hypo-methylation	-0.9377
1	17297000	17297500	hypo-methylation	-0.410658
1	17305500	17305900	hypo-methylation	-0.535386
1	17322300	17322600	hypo-methylation	-0.9623
1	17334000	17334200	hypo-methylation	-0.759371
1	17334800	17335500	hypo-methylation	-0.432219
1	17348500	17348900	hypo-methylation	-0.527909
1	17355100	17355600	hypo-methylation	-0.736069
1	17381100	17381300	hypo-methylation	-0.662675
1	17383300	17383800	hypo-methylation	-0.716
1	17385700	17386200	hypo-methylation	-0.453207
1	17386900	17387400	hypo-methylation	-0.447935
1	17390200	17390700	hypo-methylation	-0.649889
1	17393000	17393100	hypo-methylation	-0.702975
1	17393200	17393500	hypo-methylation	-0.798
1	17407300	17407500	hypo-methylation	-0.312053
1	17408500	17408700	hypo-methylation	-0.912691
1	17411200	17412000	hypo-methylation	-0.82092
1	17414200	17414700	hypo-methylation	-0.944515
1	17416200	17416700	hypo-methylation	-0.665583
1	17421900	17422200	hypo-methylation	-0.60221
1	17435600	17436100	hypo-methylation	-0.553975
1	17446400	17447000	hypo-methylation	-0.647765
1	17447100	17447700	hypo-methylation	-0.647493
1	17447800	17448400	hypo-methylation	-0.639638
1	17449600	17450100	hypo-methylation	-0.612513
1	17470100	17470600	hypo-methylation	-0.524637
1	17484000	17484500	hypo-methylation	-0.527308
1	17494600	17495900	hypo-methylation	-0.705794
1	17497100	17498600	hypo-methylation	-0.611585
1	17509100	17509700	hypo-methylation	-0.738098
1	17514600	17514900	hypo-methylation	-0.616413
1	17589600	17590100	hypo-methylation	-0.692869
1	17590400	17591000	hypo-methylation	-0.668894
1	17591300	17592000	hypo-methylation	-0.913001
1	17593800	17594400	hypo-methylation	-0.670172
1	17594700	17595300	hypo-methylation	-0.558468
1	17603500	17603800	hypo-methylation	-0.239508
1	17608500	17609000	hypo-methylation	-0.562958
1	17610900	17611400	hypo-methylation	-0.511672
1	17619200	17619700	hypo-methylation	-0.468492
1	17627700	17628000	hypo-methylation	-0.3327
1	17677200	17677700	hypo-methylation	-0.767525
1	17685500	17685900	hypo-methylation	-0.354048
1	17686200	17686700	hypo-methylation	-0.580618
1	17687600	17688400	hypo-methylation	-0.811616
1	17688800	17689300	hypo-methylation	-0.851786
1	17694200	17695300	hypo-methylation	-0.647397
1	17695700	17696200	hypo-methylation	-0.61386
1	17736700	17737200	hypo-methylation	-0.550034
1	17747400	17747500	hypo-methylation	-0.29665
1	17760000	17760700	hypo-methylation	-0.807815
1	17769400	17770100	hypo-methylation	-0.712594
1	17794300	17794400	hypo-methylation	-0.661617
1	17795200	17796100	hypo-methylation	-0.793933
1	17838200	17838600	hypo-methylation	-0.587318
1	17856100	17856600	hypo-methylation	-0.628337
1	17857500	17857900	hypo-methylation	-0.363026
1	17865400	17865900	hypo-methylation	-0.712104
1	17866100	17866600	hypo-methylation	-0.767983
1	17885000	17886100	hypo-methylation	-0.806089
1	17885000	17886100	hyper-methylation	0.68154
1	17912800	17913100	hypo-methylation	-0.359801
1	17928900	17929700	hypo-methylation	-0.463995
1	17957400	17957900	hypo-methylation	-0.675231
1	17958000	17958100	hypo-methylation	-0.520363
1	17958500	17959000	hypo-methylation	-0.580829
1	17973600	17973900	hypo-methylation	-0.667562
1	18003300	18003700	hypo-methylation	-0.344759
1	18023500	18024000	hypo-methylation	-0.9345
1	18032100	18032600	hypo-methylation	-0.462726
1	18036900	18037300	hypo-methylation	-0.688216
1	18038500	18039000	hypo-methylation	-0.698038
1	18040100	18041200	hypo-methylation	-0.60062
1	18058300	18058400	hypo-methylation	-0.414781
1	18059300	18059900	hypo-methylation	-0.735951
1	18064700	18065200	hypo-methylation	-0.72225
1	18068800	18069100	hypo-methylation	-0.664108
1	18093600	18094700	hypo-methylation	-0.951902
1	18098300	18098400	hypo-methylation	-0.4989
1	18099500	18099900	hypo-methylation	-0.747864
1	18100100	18100300	hypo-methylation	-0.489824
1	18105200	18105600	hypo-methylation	-0.939083
1	18108400	18108900	hypo-methylation	-0.953192
1	18113300	18114000	hypo-methylation	-0.660732
1	18129800	18130200	hypo-methylation	-0.425544
1	18132500	18132800	hypo-methylation	-0.463
1	18136200	18136500	hypo-methylation	-0.790533
1	18144300	18144800	hypo-methylation	-0.58465
1	18150100	18150600	hypo-methylation	-0.686028
1	18206800	18207400	hypo-methylation	-0.753305
1	18223300	18223800	hypo-methylation	-0.772496
1	18225200	18225700	hypo-methylation	-0.453677
1	18226000	18226200	hypo-methylation	-0.499258
1	18266000	18266400	hypo-methylation	-0.532334
1	18297400	18297700	hypo-methylation	-0.256609
1	18302500	18302900	hypo-methylation	-0.299175
1	18350300	18350800	hypo-methylation	-0.491577
1	18351400	18351800	hypo-methylation	-0.62635
1	18352400	18352900	hypo-methylation	-0.921758
1	18355500	18355600	hypo-methylation	-0.414145
1	18357600	18358000	hypo-methylation	-0.67905
1	18365600	18366200	hypo-methylation	-0.916359
1	18368700	18368800	hypo-methylation	-0.514069
1	18369200	18369700	hypo-methylation	-0.497063
1	18374700	18375300	hypo-methylation	-0.796733
1	18376800	18377400	hypo-methylation	-0.875563
1	18400500	18400900	hypo-methylation	-0.839767
1	18411800	18412900	hypo-methylation	-0.675133
1	18464900	18465500	hypo-methylation	-0.67789
1	18465600	18466100	hypo-methylation	-0.685776
1	18480200	18480800	hypo-methylation	-0.729968
1	18482000	18482500	hypo-methylation	-0.407467
1	18482900	18483100	hypo-methylation	-0.353806
1	18527400	18527900	hypo-methylation	-0.562389
1	18534900	18535300	hypo-methylation	-0.552679
1	18536800	18537200	hypo-methylation	-0.500483
1	18603500	18604000	hypo-methylation	-0.551033
1	18621700	18622100	hypo-methylation	-0.551471
1	18627900	18628100	hypo-methylation	-0.651042
1	18658800	18659100	hypo-methylation	-0.451542
1	18674600	18675300	hypo-methylation	-0.855272
1	18682600	18683600	hypo-methylation	-0.746371
1	18713800	18714200	hypo-methylation	-0.322511
1	18717300	18717600	hypo-methylation	-0.742049
1	18745800	18746300	hypo-methylation	-0.870678
1	18958500	18958800	hypo-methylation	-0.3383
1	19076900	19077400	hypo-methylation	-0.483475
1	19207300	19207400	hypo-methylation	-0.352796
1	19209700	19209900	hypo-methylation	-0.37255
1	19249200	19249600	hypo-methylation	-0.316384
1	19252100	19252500	hypo-methylation	-0.401859
1	19253900	19254500	hypo-methylation	-0.956131
1	20436700	20436900	hypo-methylation	-0.318163
1	20470000	20470400	hypo-methylation	-0.594821
1	20489800	20490200	hypo-methylation	-0.417994
1	20497700	20497900	hypo-methylation	-0.487623
1	20504100	20504800	hypo-methylation	-0.586811
1	20509000	20509200	hypo-methylation	-0.646499
1	20509300	20509400	hypo-methylation	-0.764827
1	20509700	20510400	hypo-methylation	-0.867183
1	20512000	20512500	hypo-methylation	-0.686486
1	20513200	20513700	hypo-methylation	-0.883282
1	20517300	20517700	hypo-methylation	-0.602145
1	20572400	20572800	hypo-methylation	-0.812595
1	20577000	20577400	hypo-methylation	-0.496108
1	20589900	20590400	hypo-methylation	-0.922306
1	20590700	20591300	hypo-methylation	-0.880464
1	20591700	20592100	hypo-methylation	-0.388984
1	20592900	20593400	hypo-methylation	-0.8893
1	20634500	20634800	hypo-methylation	-0.297996
1	20650000	20650400	hypo-methylation	-0.548225
1	20711200	20711700	hypo-methylation	-0.666054
1	20906900	20907400	hypo-methylation	-0.523998
1	20908900	20909400	hypo-methylation	-0.448448
1	20911100	20911500	hypo-methylation	-0.723941
1	20916200	20916700	hypo-methylation	-0.636975
1	20946000	20946200	hypo-methylation	-0.470542
1	20958600	20958800	hypo-methylation	-0.369475
1	20960200	20961400	hypo-methylation	-0.674934
1	20989300	20989800	hypo-methylation	-0.90124
1	21026800	21027100	hypo-methylation	-0.373179
1	21055700	21056200	hypo-methylation	-0.556547
1	21059300	21059700	hypo-methylation	-0.718177
1	21118300	21118800	hypo-methylation	-0.98136
1	21197900	21198300	hypo-methylation	-0.353459
1	21223300	21224200	hypo-methylation	-0.504364
1	21226300	21226400	hypo-methylation	-0.455725
1	21282900	21283400	hypo-methylation	-0.674342
1	21346200	21346400	hypo-methylation	-0.382544
1	21718100	21718500	hypo-methylation	-0.529187
1	21718900	21719400	hypo-methylation	-0.545806
1	21742200	21742600	hypo-methylation	-0.412413
1	21792000	21792500	hypo-methylation	-0.543392
1	21795000	21795600	hypo-methylation	-0.700546
1	21839400	21839900	hypo-methylation	-0.454817
1	21875800	21876300	hypo-methylation	-0.501084
1	21876400	21876800	hypo-methylation	-0.796775
1	21877200	21877500	hypo-methylation	-0.671761
1	21877800	21878300	hypo-methylation	-0.76642
1	21889400	21889600	hypo-methylation	-0.3256
1	21890200	21890800	hypo-methylation	-0.478799
1	21906900	21907400	hypo-methylation	-0.495263
1	21907500	21907700	hypo-methylation	-0.472907
1	21930400	21930500	hypo-methylation	-0.536684
1	21931300	21931600	hypo-methylation	-0.419949
1	21966900	21967300	hypo-methylation	-0.399212
1	21986000	21986400	hypo-methylation	-0.519663
1	21999100	21999600	hypo-methylation	-0.655025
1	22010300	22010800	hypo-methylation	-0.742106
1	22011200	22011700	hypo-methylation	-0.907131
1	22012400	22012900	hypo-methylation	-0.778116
1	22013800	22013900	hypo-methylation	-0.436962
1	22015200	22015700	hypo-methylation	-0.890031
1	22020400	22020900	hypo-methylation	-0.462564
1	22023500	22024200	hypo-methylation	-0.944245
1	22024700	22025100	hypo-methylation	-0.493773
1	22025500	22026400	hypo-methylation	-0.790793
1	22037700	22038100	hypo-methylation	-0.507023
1	22081900	22082000	hypo-methylation	-0.327817
1	22082900	22083400	hypo-methylation	-0.639192
1	22108400	22108900	hypo-methylation	-0.461991
1	22112300	22112800	hypo-methylation	-0.370198
1	22115200	22115500	hypo-methylation	-0.572331
1	22119300	22119800	hypo-methylation	-0.628831
1	22125000	22125500	hypo-methylation	-0.413512
1	22130700	22131100	hypo-methylation	-0.447118
1	22134400	22134800	hypo-methylation	-0.449473
1	22135300	22135600	hypo-methylation	-0.464417
1	22145400	22145700	hypo-methylation	-0.476183
1	22188500	22188800	hypo-methylation	-0.443546
1	22194300	22194900	hypo-methylation	-0.638587
1	22200500	22200700	hypo-methylation	-0.249379
1	22208300	22208800	hypo-methylation	-0.452523
1	22216700	22217000	hypo-methylation	-0.286366
1	22241500	22241900	hypo-methylation	-0.356421
1	22245600	22246000	hypo-methylation	-0.590514
1	22250900	22251200	hypo-methylation	-0.279193
1	22283400	22283700	hypo-methylation	-0.543969
1	22285400	22286800	hypo-methylation	-0.622467
1	22286900	22287500	hypo-methylation	-0.597436
1	22290700	22291100	hypo-methylation	-0.6392
1	22313000	22313400	hypo-methylation	-0.262966
1	22327800	22328500	hypo-methylation	-0.666883
1	22343200	22343500	hypo-methylation	-0.433629
1	22347700	22348100	hypo-methylation	-0.449019
1	22353700	22354200	hypo-methylation	-0.758857
1	22354400	22355300	hypo-methylation	-0.672912
1	22355500	22356000	hypo-methylation	-0.706144
1	22383000	22383500	hypo-methylation	-0.446462
1	22457400	22457700	hypo-methylation	-0.702323
1	22458900	22459600	hypo-methylation	-0.784779
1	22461000	22461100	hypo-methylation	-0.724724
1	22462400	22462900	hypo-methylation	-0.921809
1	22469000	22469300	hypo-methylation	-0.758525
1	22474700	22475200	hypo-methylation	-0.784858
1	22475500	22476400	hypo-methylation	-0.683644
1	22482200	22482700	hypo-methylation	-0.351114
1	22487700	22488200	hypo-methylation	-0.417218
1	22493400	22494100	hypo-methylation	-0.886497
1	22497000	22497200	hypo-methylation	-0.609464
1	22523900	22524200	hypo-methylation	-0.436761
1	22543200	22543500	hypo-methylation	-0.729471
1	22600100	22600700	hypo-methylation	-0.494771
1	22607700	22608400	hypo-methylation	-0.434984
1	22614100	22614700	hypo-methylation	-0.498844
1	22621300	22621600	hypo-methylation	-0.49413
1	22625600	22626300	hypo-methylation	-0.3088
1	22625600	22626300	hypo-methylation	-0.353325
1	22625600	22626300	hyper-methylation	0.30355
1	22625600	22626300	hyper-methylation	0.312987
1	22648400	22648700	hypo-methylation	-0.535637
1	22653800	22654000	hypo-methylation	-0.290838
1	22655400	22655700	hypo-methylation	-0.349108
1	22662700	22662800	hypo-methylation	-0.382104
1	22662700	22662800	hypo-methylation	-0.443592
1	22663000	22664000	hypo-methylation	-0.451512
1	22663000	22664000	hypo-methylation	-0.513
1	22668700	22669100	hypo-methylation	-0.391139
1	22670300	22670800	hypo-methylation	-0.497301
1	22694500	22694800	hypo-methylation	-0.4579
1	22726600	22727100	hypo-methylation	-0.337621
1	22726600	22727100	hypo-methylation	-0.338654
1	22727300	22727700	hypo-methylation	-0.362362
1	22727300	22727700	hypo-methylation	-0.363396
1	22730500	22731000	hypo-methylation	-0.623725
1	22738500	22738600	hypo-methylation	-0.319361
1	22743200	22743500	hypo-methylation	-0.715294
1	22744400	22745000	hypo-methylation	-0.818196
1	22773500	22774000	hypo-methylation	-0.673772
1	22774500	22775000	hypo-methylation	-0.744781
1	22786800	22787300	hypo-methylation	-0.676299
1	22795300	22795400	hypo-methylation	-0.802885
1	22796000	22796400	hypo-methylation	-0.920946
1	22797100	22797500	hypo-methylation	-0.659096
1	22797600	22797700	hypo-methylation	-0.769853
1	22798100	22798400	hypo-methylation	-0.797394
1	22806700	22807300	hypo-methylation	-0.713799
1	22810900	22811400	hypo-methylation	-0.649229
1	22814700	22815200	hypo-methylation	-0.595981
1	22815900	22817400	hypo-methylation	-0.717401
1	22819000	22819700	hypo-methylation	-0.66333
1	22821400	22821700	hypo-methylation	-0.276175
1	22829000	22829600	hypo-methylation	-0.63316
1	22837000	22837900	hypo-methylation	-0.501605
1	22838600	22839900	hypo-methylation	-0.794719
1	22840000	22840500	hypo-methylation	-0.768329
1	22840700	22840800	hypo-methylation	-0.644187
1	22852800	22853300	hypo-methylation	-0.561816
1	22860600	22861000	hypo-methylation	-0.571808
1	22877700	22878100	hypo-methylation	-0.44226
1	22878300	22878800	hypo-methylation	-0.577713
1	22883000	22884100	hypo-methylation	-0.476799
1	22884200	22884400	hypo-methylation	-0.461913
1	22890100	22890600	hypo-methylation	-0.521929
1	22899400	22899600	hypo-methylation	-0.262157
1	22900300	22900700	hypo-methylation	-0.703109
1	22906500	22906600	hypo-methylation	-0.383335
1	22913000	22913300	hypo-methylation	-0.531481
1	22914000	22914100	hypo-methylation	-0.554
1	22920600	22920900	hypo-methylation	-0.740275
1	22923900	22925300	hypo-methylation	-0.685029
1	22927900	22928400	hypo-methylation	-0.69161
1	22933000	22933400	hypo-methylation	-0.73517
1	22935400	22935900	hypo-methylation	-0.750904
1	22936200	22936800	hypo-methylation	-0.450968
1	22937000	22937500	hypo-methylation	-0.564263
1	22942600	22943400	hypo-methylation	-0.91253
1	22944300	22944900	hypo-methylation	-0.847104
1	22959300	22960000	hypo-methylation	-0.536434
1	22962400	22963000	hypo-methylation	-0.633369
1	22963400	22963900	hypo-methylation	-0.706593
1	22964500	22965100	hypo-methylation	-0.608998
1	22970000	22970300	hypo-methylation	-0.270125
1	22970000	22970300	hypo-methylation	-0.317617
1	22972200	22972900	hypo-methylation	-0.517042
1	22998500	22998900	hypo-methylation	-0.671717
1	23003100	23003400	hypo-methylation	-0.722583
1	23093100	23093500	hypo-methylation	-0.87444
1	23169500	23169800	hypo-methylation	-0.359458
1	23187300	23187600	hypo-methylation	-0.540879
1	23188200	23188900	hypo-methylation	-0.446736
1	23189900	23190200	hypo-methylation	-0.46698
1	23190900	23191400	hypo-methylation	-0.956925
1	23198000	23198500	hypo-methylation	-0.564933
1	23205700	23205800	hypo-methylation	-0.675944
1	23229600	23229800	hypo-methylation	-0.414112
1	23231600	23231900	hypo-methylation	-0.415686
1	23232800	23233100	hypo-methylation	-0.9351
1	23241100	23241600	hypo-methylation	-0.610925
1	23294200	23294900	hypo-methylation	-0.687595
1	23346500	23347000	hypo-methylation	-0.752385
1	23384300	23384500	hypo-methylation	-0.577279
1	23385200	23385500	hypo-methylation	-0.432737
1	23392000	23392500	hypo-methylation	-0.901696
1	23400100	23400500	hypo-methylation	-0.354163
1	23402100	23402500	hypo-methylation	-0.669629
1	23404200	23404600	hypo-methylation	-0.654676
1	23405300	23405800	hypo-methylation	-0.323858
1	23411900	23412200	hypo-methylation	-0.51076
1	23412900	23413500	hypo-methylation	-0.611842
1	23413600	23414800	hypo-methylation	-0.729892
1	23416000	23416500	hypo-methylation	-0.45495
1	23427200	23427400	hypo-methylation	-0.468863
1	23439300	23439900	hypo-methylation	-0.842052
1	23440000	23440500	hypo-methylation	-0.7485
1	23513900	23514200	hypo-methylation	-0.504467
1	23559500	23560000	hypo-methylation	-0.435362
1	23568400	23569400	hypo-methylation	-0.587377
1	23570700	23571200	hypo-methylation	-0.950785
1	23586700	23587000	hypo-methylation	-0.262612
1	23617300	23617500	hypo-methylation	-0.440862
1	23620100	23620400	hypo-methylation	-0.412075
1	23625600	23626000	hypo-methylation	-0.445712
1	23646600	23646900	hypo-methylation	-0.726638
1	23659900	23660400	hypo-methylation	-0.755375
1	23663900	23664400	hypo-methylation	-0.62144
1	23666500	23666800	hypo-methylation	-0.508236
1	23670300	23670600	hypo-methylation	-0.400956
1	23671100	23671400	hypo-methylation	-0.512867
1	23671600	23672100	hypo-methylation	-0.560273
1	23673100	23673500	hypo-methylation	-0.359491
1	23677800	23678600	hypo-methylation	-0.479326
1	23681000	23681100	hypo-methylation	-0.474902
1	23681300	23681800	hypo-methylation	-0.543106
1	23690000	23690500	hypo-methylation	-0.605825
1	23716300	23716600	hypo-methylation	-0.291913
1	23721800	23722100	hypo-methylation	-0.610845
1	23736400	23737100	hypo-methylation	-0.784616
1	23743800	23744100	hypo-methylation	-0.281859
1	23746300	23746600	hypo-methylation	-0.39802
1	23755000	23755500	hypo-methylation	-0.546246
1	23755600	23755900	hypo-methylation	-0.601405
1	23766400	23767000	hypo-methylation	-0.498478
1	23766400	23767000	hypo-methylation	-0.505691
1	23766400	23767000	hypo-methylation	-0.508532
1	23766400	23767000	hypo-methylation	-0.515745
1	23817100	23817500	hypo-methylation	-0.935388
1	23823300	23823700	hypo-methylation	-0.460927
1	23834400	23835200	hypo-methylation	-0.477399
1	23836400	23836900	hypo-methylation	-0.574492
1	23868900	23869300	hypo-methylation	-0.611825
1	23878000	23878500	hypo-methylation	-0.43015
1	23884700	23885000	hypo-methylation	-0.298136
1	23893100	23893500	hypo-methylation	-0.623456
1	23915000	23915500	hypo-methylation	-0.533763
1	23928800	23929200	hypo-methylation	-0.667635
1	23944100	23944600	hypo-methylation	-0.85885
1	23945300	23945700	hypo-methylation	-0.897175
1	23948200	23948700	hypo-methylation	-0.786976
1	23950300	23950800	hypo-methylation	-0.463194
1	23951100	23952100	hypo-methylation	-0.895896
1	23952400	23952900	hypo-methylation	-0.940113
1	23953300	23953900	hypo-methylation	-0.935059
1	23954000	23954500	hypo-methylation	-0.874559
1	23955700	23956300	hypo-methylation	-0.601571
1	23957500	23959200	hypo-methylation	-0.912389
1	23960300	23961000	hypo-methylation	-0.921875
1	23961800	23962600	hypo-methylation	-0.924227
1	23962700	23964100	hypo-methylation	-0.869317
1	23965400	23966000	hypo-methylation	-0.926959
1	23966900	23967100	hypo-methylation	-0.419769
1	23967400	23967900	hypo-methylation	-0.491521
1	24004800	24005500	hypo-methylation	-0.556515
1	24037000	24037300	hypo-methylation	-0.556783
1	24095900	24096900	hypo-methylation	-0.657078
1	24106100	24106600	hypo-methylation	-0.496491
1	24117400	24117800	hypo-methylation	-0.403145
1	24129900	24130100	hypo-methylation	-0.414833
1	24135700	24136300	hypo-methylation	-0.697952
1	24164000	24164400	hypo-methylation	-0.617775
1	24186500	24187000	hypo-methylation	-0.593684
1	24212100	24212300	hypo-methylation	-0.372012
1	24215800	24216100	hypo-methylation	-0.2405
1	24219700	24219800	hypo-methylation	-0.327896
1	24219900	24220200	hypo-methylation	-0.284133
1	24233900	24234400	hypo-methylation	-0.723534
1	24235100	24235500	hypo-methylation	-0.762266
1	24235900	24236900	hypo-methylation	-0.776549
1	24254400	24254900	hypo-methylation	-0.490339
1	24267700	24268200	hypo-methylation	-0.468603
1	24275700	24276400	hypo-methylation	-0.582666
1	24286500	24286600	hypo-methylation	-0.819581
1	24287100	24287900	hypo-methylation	-0.915123
1	24289500	24290000	hypo-methylation	-0.850101
1	24290500	24291800	hypo-methylation	-0.795399
1	24292000	24292300	hypo-methylation	-0.705083
1	24293600	24294000	hypo-methylation	-0.393311
1	24304100	24304600	hypo-methylation	-0.410826
1	24305000	24305900	hypo-methylation	-0.376943
1	24308800	24309000	hypo-methylation	-0.699269
1	24314700	24315100	hypo-methylation	-0.730133
1	24318900	24319900	hypo-methylation	-0.754834
1	24318900	24319900	hypo-methylation	-0.761628
1	24318900	24319900	hypo-methylation	-0.794817
1	24318900	24319900	hypo-methylation	-0.801611
1	24330800	24331100	hypo-methylation	-0.389659
1	24346100	24346300	hypo-methylation	-0.854005
1	24359400	24359600	hypo-methylation	-0.842087
1	24372800	24373200	hypo-methylation	-0.838996
1	24375100	24375600	hypo-methylation	-0.507788
1	24376700	24377000	hypo-methylation	-0.734101
1	24377100	24377700	hypo-methylation	-0.818914
1	24383700	24384000	hyper-methylation	0.389725
1	24403500	24403700	hypo-methylation	-0.399632
1	24439700	24439900	hypo-methylation	-0.482133
1	24459200	24459900	hypo-methylation	-0.736571
1	24460000	24460500	hypo-methylation	-0.759196
1	24463100	24463400	hypo-methylation	-0.669517
1	24466800	24467900	hypo-methylation	-0.636641
1	24472300	24472800	hypo-methylation	-0.677908
1	24476400	24476800	hypo-methylation	-0.878954
1	24478400	24479700	hypo-methylation	-0.91918
1	24507500	24508000	hypo-methylation	-0.498285
1	24508800	24509100	hypo-methylation	-0.389809
1	24524300	24524600	hypo-methylation	-0.310717
1	24527900	24528400	hypo-methylation	-0.788316
1	24540900	24541400	hypo-methylation	-0.942012
1	24541600	24542100	hypo-methylation	-0.972408
1	24548800	24549200	hypo-methylation	-0.479911
1	24564000	24564400	hypo-methylation	-0.927017
1	24565900	24566400	hypo-methylation	-0.979937
1	24567400	24567900	hypo-methylation	-0.701061
1	24577100	24577300	hyper-methylation	0.312675
1	24589100	24589800	hypo-methylation	-0.569934
1	24591900	24592300	hypo-methylation	-0.65545
1	24599200	24599700	hypo-methylation	-0.944189
1	24620700	24621200	hypo-methylation	-0.675173
1	24632800	24633300	hypo-methylation	-0.871758
1	24636400	24636900	hypo-methylation	-0.541779
1	24637000	24637400	hypo-methylation	-0.9484
1	24639400	24639800	hypo-methylation	-0.683404
1	24642700	24642800	hypo-methylation	-0.309075
1	24643500	24644200	hypo-methylation	-0.559947
1	24692300	24692800	hypo-methylation	-0.962314
1	24693100	24693600	hypo-methylation	-0.76619
1	24693700	24694400	hypo-methylation	-0.883268
1	24695000	24695500	hypo-methylation	-0.830099
1	24702900	24703400	hypo-methylation	-0.521483
1	24714700	24715000	hypo-methylation	-0.48835
1	24717200	24717700	hypo-methylation	-0.502612
1	24726900	24727100	hypo-methylation	-0.543875
1	24732100	24732500	hypo-methylation	-0.591298
1	24760800	24761000	hypo-methylation	-0.670896
1	24761100	24761500	hypo-methylation	-0.568237
1	24781300	24781900	hypo-methylation	-0.425855
1	24800700	24801300	hypo-methylation	-0.677531
1	24806600	24807000	hypo-methylation	-0.572825
1	24810300	24810700	hypo-methylation	-0.9006
1	24815700	24816500	hypo-methylation	-0.508255
1	24826800	24827400	hypo-methylation	-0.911833
1	24836800	24837000	hypo-methylation	-0.925312
1	24873600	24874000	hypo-methylation	-0.644408
1	24891200	24891600	hypo-methylation	-0.74464
1	24899900	24900200	hypo-methylation	-0.3065
1	24922200	24922900	hypo-methylation	-0.36395
1	24943900	24944100	hypo-methylation	-0.752375
1	24948900	24949100	hypo-methylation	-0.489413
1	24956800	24957000	hypo-methylation	-0.397311
1	24965700	24966200	hypo-methylation	-0.509558
1	24976200	24976700	hypo-methylation	-0.496064
1	24983800	24983900	hypo-methylation	-0.555063
1	24985000	24985500	hypo-methylation	-0.457692
1	25015300	25015800	hypo-methylation	-0.80544
1	25017400	25017900	hypo-methylation	-0.590134
1	25018300	25018600	hypo-methylation	-0.551056
1	25019900	25020400	hypo-methylation	-0.869221
1	25028400	25029000	hypo-methylation	-0.489939
1	25036600	25037200	hypo-methylation	-0.573951
1	25037300	25037600	hypo-methylation	-0.510151
1	25054300	25054500	hypo-methylation	-0.599529
1	25065100	25065400	hypo-methylation	-0.370309
1	25079700	25080400	hypo-methylation	-0.719804
1	25088200	25088500	hypo-methylation	-0.394641
1	25088700	25089200	hypo-methylation	-0.559312
1	25137100	25137500	hypo-methylation	-0.469025
1	25142200	25142700	hypo-methylation	-0.44386
1	25144100	25144300	hypo-methylation	-0.363503
1	25154800	25155400	hypo-methylation	-0.406955
1	25184500	25184800	hypo-methylation	-0.2204
1	25228700	25229000	hypo-methylation	-0.452387
1	25229900	25230400	hypo-methylation	-0.78089
1	25524900	25525400	hypo-methylation	-0.527238
1	25527600	25528200	hypo-methylation	-0.978549
1	25673500	25673600	hypo-methylation	-0.3366
1	25739000	25739400	hypo-methylation	-0.446004
1	25744500	25744800	hypo-methylation	-0.319525
1	25770300	25770400	hypo-methylation	-0.474346
1	25854500	25855000	hypo-methylation	-0.67486
1	25856300	25856600	hypo-methylation	-0.600989
1	25871800	25872400	hypo-methylation	-0.557571
1	25877200	25877800	hypo-methylation	-0.735055
1	25947800	25948200	hypo-methylation	-0.343021
1	25951100	25951600	hypo-methylation	-0.43245
1	25953600	25953800	hypo-methylation	-0.711121
1	25964500	25965100	hypo-methylation	-0.774738
1	25973000	25973200	hypo-methylation	-0.505398
1	25993800	25994000	hypo-methylation	-0.408462
1	25994100	25994500	hypo-methylation	-0.357337
1	25999800	26000300	hypo-methylation	-0.651736
1	26030000	26030300	hypo-methylation	-0.463091
1	26035600	26036100	hypo-methylation	-0.559408
1	26049700	26050200	hypo-methylation	-0.632167
1	26051000	26051600	hypo-methylation	-0.381912
1	26052800	26053300	hypo-methylation	-0.766417
1	26056200	26056500	hypo-methylation	-0.582617
1	26066100	26066600	hypo-methylation	-0.873604
1	26067500	26068200	hypo-methylation	-0.87635
1	26085400	26086700	hypo-methylation	-0.673208
1	26178000	26178600	hypo-methylation	-0.622909
1	26195200	26195800	hypo-methylation	-0.568291
1	26195200	26195800	hypo-methylation	-0.615766
1	26197000	26197300	hypo-methylation	-0.665013
1	26219200	26219300	hypo-methylation	-0.291025
1	26233900	26234500	hypo-methylation	-0.780118
1	26237000	26237400	hypo-methylation	-0.534342
1	26240200	26240300	hypo-methylation	-0.6092
1	26244800	26245300	hypo-methylation	-0.633234
1	26248800	26249300	hypo-methylation	-0.582137
1	26267100	26267600	hypo-methylation	-0.935525
1	26282500	26283200	hypo-methylation	-0.942252
1	26303200	26303800	hypo-methylation	-0.455435
1	26304500	26305000	hypo-methylation	-0.36387
1	26314500	26315200	hypo-methylation	-0.385002
1	26316600	26317100	hypo-methylation	-0.545083
1	26317300	26317600	hypo-methylation	-0.410095
1	26320200	26320500	hypo-methylation	-0.385713
1	26324500	26325200	hypo-methylation	-0.60728
1	26371400	26371700	hypo-methylation	-0.270646
1	26374200	26374800	hypo-methylation	-0.730669
1	26404100	26404500	hypo-methylation	-0.4527
1	26437800	26438300	hypo-methylation	-0.469317
1	26440700	26441400	hypo-methylation	-0.663199
1	26441500	26442000	hypo-methylation	-0.541727
1	26442300	26442900	hypo-methylation	-0.586703
1	26444000	26444600	hypo-methylation	-0.642003
1	26444000	26444600	hypo-methylation	-0.72335
1	26468500	26469000	hypo-methylation	-0.547225
1	26475100	26475400	hypo-methylation	-0.257675
1	26540800	26541300	hypo-methylation	-0.375487
1	26585600	26585900	hypo-methylation	-0.963908
1	26711000	26711800	hypo-methylation	-0.404308
1	26723300	26723800	hypo-methylation	-0.819524
1	26727600	26728000	hypo-methylation	-0.545727
1	26738400	26738900	hypo-methylation	-0.818726
1	26739500	26739800	hypo-methylation	-0.667245
1	26741800	26742500	hypo-methylation	-0.711608
1	26756800	26757200	hypo-methylation	-0.365502
1	26773800	26774000	hypo-methylation	-0.432754
1	26774100	26774300	hypo-methylation	-0.413979
1	26783300	26783600	hypo-methylation	-0.412275
1	26797900	26798200	hypo-methylation	-0.502426
1	26807100	26807500	hypo-methylation	-0.417683
1	26809200	26809800	hypo-methylation	-0.664398
1	26810100	26810800	hypo-methylation	-0.666502
1	26816600	26817100	hypo-methylation	-0.396215
1	26820800	26821100	hypo-methylation	-0.294791
1	26832900	26833500	hypo-methylation	-0.542206
1	26833600	26834100	hypo-methylation	-0.561943
1	26847400	26847700	hypo-methylation	-0.588137
1	26887600	26888000	hypo-methylation	-0.366374
1	26905900	26906300	hypo-methylation	-0.369269
1	26909100	26909200	hypo-methylation	-0.540825
1	26909900	26910100	hypo-methylation	-0.73431
1	26910200	26911200	hypo-methylation	-0.841401
1	26914300	26914900	hypo-methylation	-0.938602
1	26915400	26916800	hypo-methylation	-0.791713
1	26917300	26917900	hypo-methylation	-0.603418
1	26924800	26925000	hypo-methylation	-0.744666
1	26928800	26929300	hypo-methylation	-0.624434
1	26929600	26930000	hypo-methylation	-0.423962
1	26930200	26930700	hypo-methylation	-0.477554
1	26937500	26938100	hypo-methylation	-0.809764
1	26940200	26940800	hypo-methylation	-0.789219
1	26969400	26969900	hypo-methylation	-0.635932
1	26970000	26970600	hypo-methylation	-0.568345
1	27009400	27009900	hypo-methylation	-0.744152
1	27024300	27024800	hypo-methylation	-0.446373
1	27043200	27043500	hypo-methylation	-0.45945
1	27060500	27060700	hypo-methylation	-0.493916
1	27094500	27094900	hypo-methylation	-0.350333
1	27116600	27117100	hypo-methylation	-0.93967
1	27125200	27125700	hypo-methylation	-0.365492
1	27134400	27134800	hypo-methylation	-0.80693
1	27135200	27135800	hypo-methylation	-0.752218
1	27137800	27139100	hypo-methylation	-0.776304
1	27143800	27144800	hypo-methylation	-0.86258
1	27170600	27171200	hypo-methylation	-0.746269
1	27204300	27205200	hypo-methylation	-0.705689
1	27205400	27205700	hypo-methylation	-0.613035
1	27213400	27213800	hypo-methylation	-0.431975
1	27216100	27216700	hypo-methylation	-0.379453
1	27225000	27225300	hypo-methylation	-0.44768
1	27230900	27231400	hypo-methylation	-0.459659
1	27246600	27247000	hypo-methylation	-0.444654
1	27258800	27259200	hypo-methylation	-0.453935
1	27262600	27262900	hypo-methylation	-0.617333
1	27265100	27265700	hypo-methylation	-0.63685
1	27277100	27277700	hypo-methylation	-0.546669
1	27293700	27293800	hypo-methylation	-0.633077
1	27293900	27294200	hypo-methylation	-0.784636
1	27294500	27295200	hypo-methylation	-0.74964
1	27297200	27297700	hypo-methylation	-0.758165
1	27297800	27298400	hypo-methylation	-0.800381
1	27310200	27310500	hypo-methylation	-0.910829
1	27310800	27311200	hypo-methylation	-0.462825
1	27313300	27313800	hypo-methylation	-0.918559
1	27313900	27314600	hypo-methylation	-0.565265
1	27315400	27315700	hypo-methylation	-0.305431
1	27335100	27335400	hypo-methylation	-0.3475
1	27416600	27417000	hypo-methylation	-0.485833
1	27520600	27520800	hypo-methylation	-0.435188
1	27538500	27538800	hypo-methylation	-0.34895
1	27542700	27543200	hypo-methylation	-0.563725
1	27548400	27548800	hypo-methylation	-0.346768
1	27564100	27564600	hypo-methylation	-0.573399
1	27571600	27571700	hypo-methylation	-0.692719
1	27578500	27578900	hypo-methylation	-0.395703
1	27584600	27585000	hypo-methylation	-0.800933
1	27586800	27587500	hypo-methylation	-0.948504
1	27588200	27588700	hypo-methylation	-0.994675
1	27599800	27599900	hypo-methylation	-0.4485
1	27616100	27616800	hypo-methylation	-0.711963
1	27620000	27620500	hypo-methylation	-0.334315
1	27629400	27629500	hypo-methylation	-0.464662
1	27638000	27638500	hypo-methylation	-0.570975
1	27646700	27647300	hypo-methylation	-0.673582
1	27648800	27649300	hypo-methylation	-0.598167
1	27654000	27655500	hypo-methylation	-0.88637
1	27663500	27664000	hypo-methylation	-0.510184
1	27664800	27665400	hypo-methylation	-0.549819
1	27669800	27670400	hypo-methylation	-0.95722
1	27671900	27672200	hypo-methylation	-0.429479
1	27672600	27673000	hypo-methylation	-0.744425
1	27683200	27683700	hypo-methylation	-0.84535
1	27687700	27688200	hypo-methylation	-0.470749
1	27695700	27696200	hypo-methylation	-0.668273
1	27702500	27704300	hypo-methylation	-0.893126
1	27709300	27709900	hypo-methylation	-0.537068
1	27719400	27720400	hypo-methylation	-0.534162
1	27721600	27721900	hypo-methylation	-0.314025
1	27739900	27740200	hypo-methylation	-0.603086
1	27740400	27740700	hypo-methylation	-0.576886
1	27741100	27742100	hypo-methylation	-0.808114
1	27760000	27760100	hypo-methylation	-0.944655
1	27815700	27816200	hypo-methylation	-0.423725
1	27843700	27844200	hypo-methylation	-0.51324
1	27845500	27846200	hypo-methylation	-0.78536
1	27847000	27847700	hypo-methylation	-0.580102
1	27857900	27858600	hypo-methylation	-0.891605
1	27860300	27862100	hypo-methylation	-0.76833
1	27881700	27881900	hypo-methylation	-0.264817
1	27911000	27911600	hypo-methylation	-0.829881
1	27912100	27912900	hypo-methylation	-0.848538
1	27913500	27913800	hypo-methylation	-0.607352
1	27914200	27914700	hypo-methylation	-0.791567
1	27921300	27921800	hypo-methylation	-0.593351
1	27922900	27923700	hypo-methylation	-0.866233
1	27928800	27929300	hypo-methylation	-0.621642
1	27944400	27944800	hypo-methylation	-0.803783
1	27972500	27973000	hypo-methylation	-0.542971
1	28048900	28049800	hypo-methylation	-0.593539
1	28048900	28049800	hypo-methylation	-0.628839
1	28048900	28049800	hypo-methylation	-0.655305
1	28048900	28049800	hypo-methylation	-0.690605
1	28054000	28054200	hypo-methylation	-0.315978
1	28055800	28056200	hypo-methylation	-0.443004
1	28057000	28057500	hypo-methylation	-0.58365
1	28072800	28073100	hypo-methylation	-0.798642
1	28073300	28073900	hypo-methylation	-0.418146
1	28105100	28105500	hypo-methylation	-0.504821
1	28110000	28110300	hypo-methylation	-0.364463
1	28125900	28126300	hypo-methylation	-0.352317
1	28134500	28135300	hypo-methylation	-0.483627
1	28135800	28136300	hypo-methylation	-0.488973
1	28155200	28155700	hypo-methylation	-0.530823
1	28177700	28178500	hypo-methylation	-0.747007
1	28179000	28179800	hypo-methylation	-0.654423
1	28180900	28181600	hypo-methylation	-0.616009
1	28182800	28183300	hypo-methylation	-0.567991
1	28191500	28192000	hypo-methylation	-0.73769
1	28200000	28200900	hypo-methylation	-0.542633
1	28201200	28201700	hypo-methylation	-0.509383
1	28202600	28202900	hypo-methylation	-0.371233
1	28203000	28203100	hypo-methylation	-0.380134
1	28204400	28204800	hypo-methylation	-0.784687
1	28205400	28205900	hypo-methylation	-0.659548
1	28206100	28206400	hypo-methylation	-0.618803
1	28212000	28212700	hypo-methylation	-0.723463
1	28213500	28214000	hypo-methylation	-0.551702
1	28222000	28222500	hypo-methylation	-0.80375
1	28268800	28269200	hypo-methylation	-0.898784
1	28276800	28277300	hypo-methylation	-0.555281
1	28344000	28344100	hypo-methylation	-0.312281
1	28344300	28344400	hypo-methylation	-0.334623
1	28359000	28359800	hypo-methylation	-0.676837
1	28362200	28362700	hypo-methylation	-0.646907
1	28397400	28398200	hypo-methylation	-0.909231
1	28400800	28401900	hypo-methylation	-0.577396
1	28434700	28435000	hypo-methylation	-0.432925
1	28441100	28441600	hypo-methylation	-0.498526
1	28442800	28443600	hypo-methylation	-0.499451
1	28444100	28444400	hypo-methylation	-0.405866
1	28459100	28459600	hypo-methylation	-0.659486
1	28461100	28461700	hypo-methylation	-0.488618
1	28463300	28463900	hypo-methylation	-0.577179
1	28464200	28464600	hypo-methylation	-0.927309
1	28471200	28471500	hypo-methylation	-0.269008
1	28490800	28490900	hypo-methylation	-0.414521
1	28575500	28575800	hypo-methylation	-0.284779
1	28578600	28579600	hypo-methylation	-0.548053
1	28580100	28580600	hypo-methylation	-0.694022
1	28588000	28588200	hypo-methylation	-0.406914
1	28598300	28598900	hypo-methylation	-0.742393
1	28598300	28598900	hypo-methylation	-0.753246
1	28599500	28599800	hypo-methylation	-0.744431
1	28599500	28599800	hypo-methylation	-0.755283
1	28600000	28600600	hypo-methylation	-0.740878
1	28600000	28600600	hypo-methylation	-0.751731
1	28600700	28601200	hypo-methylation	-0.665234
1	28600700	28601200	hypo-methylation	-0.676086
1	28602600	28602900	hypo-methylation	-0.409342
1	28631400	28631800	hypo-methylation	-0.412841
1	28634200	28634400	hypo-methylation	-0.342697
1	28661200	28661700	hypo-methylation	-0.625004
1	28663100	28663300	hypo-methylation	-0.274907
1	28681500	28681700	hypo-methylation	-0.315475
1	28765400	28765800	hypo-methylation	-0.413318
1	28772100	28772500	hypo-methylation	-0.880446
1	28772900	28773300	hypo-methylation	-0.840019
1	28774100	28774600	hypo-methylation	-0.919809
1	28802900	28803100	hypo-methylation	-0.484393
1	28819500	28819700	hypo-methylation	-0.361533
1	28820200	28820800	hypo-methylation	-0.730324
1	28847300	28847900	hypo-methylation	-0.498363
1	28897500	28897900	hypo-methylation	-0.742263
1	28898700	28899200	hypo-methylation	-0.362042
1	28907200	28908100	hypo-methylation	-0.662952
1	28932700	28933100	hypo-methylation	-0.306118
1	28944700	28945000	hypo-methylation	-0.450887
1	28946000	28946600	hypo-methylation	-0.816738
1	28957200	28957400	hypo-methylation	-0.51994
1	28959500	28960000	hypo-methylation	-0.424918
1	28960200	28960600	hypo-methylation	-0.413554
1	28961100	28961800	hypo-methylation	-0.427534
1	28973500	28973800	hypo-methylation	-0.662146
1	28983800	28984100	hypo-methylation	-0.450981
1	29047500	29047800	hypo-methylation	-0.495916
1	29054900	29055400	hypo-methylation	-0.345226
1	29061100	29061500	hypo-methylation	-0.372613
1	29077400	29078100	hypo-methylation	-0.664335
1	29113800	29114100	hypo-methylation	-0.557239
1	29115000	29116700	hypo-methylation	-0.581867
1	29120200	29120700	hypo-methylation	-0.604775
1	29140900	29141800	hypo-methylation	-0.545327
1	29141900	29142000	hypo-methylation	-0.478474
1	29163600	29164100	hypo-methylation	-0.876596
1	29164300	29164600	hypo-methylation	-0.491084
1	29201800	29202400	hypo-methylation	-0.736399
1	29210500	29211000	hypo-methylation	-0.890751
1	29211800	29212000	hypo-methylation	-0.778095
1	29215500	29215800	hypo-methylation	-0.526204
1	29237200	29237700	hypo-methylation	-0.625219
1	29238900	29239500	hypo-methylation	-0.726865
1	29265700	29265900	hypo-methylation	-0.422455
1	29266000	29266500	hypo-methylation	-0.513587
1	29274800	29275000	hypo-methylation	-0.449681
1	29276000	29276200	hypo-methylation	-0.479724
1	29276700	29277300	hypo-methylation	-0.546314
1	29277900	29278600	hypo-methylation	-0.56393
1	29284800	29285200	hypo-methylation	-0.553554
1	29303200	29303700	hypo-methylation	-0.84055
1	29313200	29314000	hypo-methylation	-0.572005
1	29313200	29314000	hyper-methylation	0.368787
1	29320600	29320900	hypo-methylation	-0.82325
1	29340700	29341600	hypo-methylation	-0.491831
1	29340700	29341600	hypo-methylation	-0.501963
1	29340700	29341600	hyper-methylation	0.2771
1	29362300	29362700	hypo-methylation	-0.424808
1	29393100	29393600	hypo-methylation	-0.400502
1	29395200	29395700	hypo-methylation	-0.600625
1	29396100	29396600	hypo-methylation	-0.478584
1	29402100	29402500	hypo-methylation	-0.780429
1	29403100	29403900	hypo-methylation	-0.874489
1	29404700	29405200	hypo-methylation	-0.517762
1	29413500	29414100	hypo-methylation	-0.762838
1	29488600	29489100	hypo-methylation	-0.387292
1	29498800	29499200	hypo-methylation	-0.397908
1	29537400	29538000	hypo-methylation	-0.887415
1	29540600	29541400	hypo-methylation	-0.835593
1	29573800	29574300	hypo-methylation	-0.857796
1	29591200	29591800	hypo-methylation	-0.831001
1	29641000	29641500	hypo-methylation	-0.612425
1	29666800	29667400	hypo-methylation	-0.849079
1	29668000	29668500	hypo-methylation	-0.56956
1	29670600	29670900	hypo-methylation	-0.765502
1	29671300	29672300	hypo-methylation	-0.842884
1	29673800	29674100	hypo-methylation	-0.44135
1	29681400	29681900	hypo-methylation	-0.684323
1	29737400	29737800	hypo-methylation	-0.6465
1	29742900	29743400	hypo-methylation	-0.647142
1	29757500	29758000	hypo-methylation	-0.48027
1	29758900	29759200	hypo-methylation	-0.418425
1	29764600	29765100	hypo-methylation	-0.881506
1	29765600	29766200	hypo-methylation	-0.932252
1	29826100	29826400	hypo-methylation	-0.394837
1	29833100	29833600	hypo-methylation	-0.752546
1	29847700	29848200	hypo-methylation	-0.446727
1	29879600	29879900	hypo-methylation	-0.456169
1	29892600	29892700	hypo-methylation	-0.387531
1	29905100	29905300	hypo-methylation	-0.33315
1	29908000	29908400	hypo-methylation	-0.324925
1	29913000	29913400	hypo-methylation	-0.548075
1	29928500	29928900	hypo-methylation	-0.507227
1	29933800	29934500	hypo-methylation	-0.406752
1	29940500	29940800	hypo-methylation	-0.263516
1	29943400	29943700	hypo-methylation	-0.315932
1	29945600	29946000	hypo-methylation	-0.349858
1	29977600	29978200	hypo-methylation	-0.722885
1	29981400	29982800	hypo-methylation	-0.525747
1	29984800	29985200	hypo-methylation	-0.478152
1	29985600	29985900	hypo-methylation	-0.309779
1	30024400	30024900	hypo-methylation	-0.425941
1	30038300	30038600	hypo-methylation	-0.538617
1	30072900	30073500	hypo-methylation	-0.720112
1	30149200	30149400	hypo-methylation	-0.373119
1	30150800	30151100	hypo-methylation	-0.443704
1	30150800	30151100	hypo-methylation	-0.589879
1	30161100	30161500	hypo-methylation	-0.350768
1	30161600	30162000	hypo-methylation	-0.378255
1	30168200	30168700	hypo-methylation	-0.935183
1	30181700	30182200	hypo-methylation	-0.867656
1	30185700	30186500	hypo-methylation	-0.415362
1	30198600	30199500	hypo-methylation	-0.669866
1	30199600	30200100	hypo-methylation	-0.476825
1	30201400	30201900	hypo-methylation	-0.493758
1	30204800	30205300	hypo-methylation	-0.727496
1	30205600	30206100	hypo-methylation	-0.537551
1	30266000	30266600	hypo-methylation	-0.499631
1	30270300	30270400	hypo-methylation	-0.571129
1	30292600	30293100	hypo-methylation	-0.408655
1	30337300	30337600	hypo-methylation	-0.437782
1	30394100	30394600	hypo-methylation	-0.970217
1	30397400	30397800	hypo-methylation	-0.569452
1	30410100	30410400	hypo-methylation	-0.371477
1	30488800	30489600	hypo-methylation	-0.851133
1	30523200	30523500	hypo-methylation	-0.371473
1	30524600	30525100	hypo-methylation	-0.373839
1	30529700	30530500	hypo-methylation	-0.625596
1	30537800	30538500	hypo-methylation	-0.75272
1	30539800	30540300	hypo-methylation	-0.952621
1	30550300	30550800	hypo-methylation	-0.798482
1	30644800	30645300	hypo-methylation	-0.483629
1	30645400	30646000	hypo-methylation	-0.570995
1	30651200	30651300	hypo-methylation	-0.536909
1	30651400	30651700	hypo-methylation	-0.481092
1	30654600	30654800	hypo-methylation	-0.319125
1	30726200	30726600	hypo-methylation	-0.428082
1	30732900	30733300	hypo-methylation	-0.370333
1	30791800	30792500	hypo-methylation	-0.611876
1	30792600	30793200	hypo-methylation	-0.565285
1	30808700	30809400	hypo-methylation	-0.630927
1	30809900	30810800	hypo-methylation	-0.489127
1	30809900	30810800	hypo-methylation	-0.512849
1	30811800	30812100	hypo-methylation	-0.380659
1	30812200	30812600	hypo-methylation	-0.345846
1	30816700	30816900	hypo-methylation	-0.274541
1	30817700	30818000	hypo-methylation	-0.31185
1	30826800	30827300	hypo-methylation	-0.556388
1	30827700	30827900	hypo-methylation	-0.450071
1	30859800	30860200	hypo-methylation	-0.642946
1	30860500	30860900	hypo-methylation	-0.423106
1	30861100	30861300	hypo-methylation	-0.257969
1	30878000	30878400	hypo-methylation	-0.437458
1	30943200	30943500	hypo-methylation	-0.5115
1	30943600	30944100	hypo-methylation	-0.351135
1	30946200	30946600	hypo-methylation	-0.505012
1	30984300	30984400	hypo-methylation	-0.448819
1	31045200	31045500	hypo-methylation	-0.269271
1	31060000	31060600	hypo-methylation	-0.690591
[truncated: 20,540 more rows]

## Sheet: CHG DMRs in Nip-Kas
Supplementary Data 5. List of differential methylated regions between parental alleles in F1 endosperm.
chromosome	start	end	Comparison between parental allele
			Maternal - Paternal allele	difference of methylation levels
1	426000	426500	hyper-methylation	0.344367
1	1103200	1103400	hypo-methylation	-0.452687
1	1896800	1897100	hypo-methylation	-0.290829
1	2152300	2152400	hypo-methylation	-0.326708
1	2676000	2676500	hypo-methylation	-0.406744
1	2677000	2677400	hypo-methylation	-0.451738
1	2868000	2868500	hypo-methylation	-0.426506
1	2869000	2869600	hypo-methylation	-0.333944
1	2870000	2870500	hypo-methylation	-0.37932
1	3786400	3786900	hypo-methylation	-0.409517
1	4087200	4087600	hypo-methylation	-0.304889
1	4088100	4088400	hypo-methylation	-0.302427
1	4141400	4141900	hypo-methylation	-0.396645
1	4182400	4182800	hyper-methylation	0.2576
1	4232300	4232500	hypo-methylation	-0.336793
1	4261300	4261600	hypo-methylation	-0.46527
1	4319000	4319200	hypo-methylation	-0.367158
1	5531800	5531900	hypo-methylation	-0.261352
1	5545100	5545700	hypo-methylation	-0.46264
1	5582500	5582800	hyper-methylation	0.270022
1	5587000	5587500	hypo-methylation	-0.351608
1	5588500	5588800	hypo-methylation	-0.35766
1	5600200	5600600	hypo-methylation	-0.555529
1	5628000	5628100	hypo-methylation	-0.267034
1	6198200	6198300	hypo-methylation	-0.428146
1	6332600	6333100	hypo-methylation	-0.371418
1	6439000	6439800	hypo-methylation	-0.430982
1	6634400	6634700	hyper-methylation	0.283582
1	7153900	7154300	hypo-methylation	-0.306981
1	7161700	7162300	hyper-methylation	0.413144
1	7163200	7163600	hyper-methylation	0.338985
1	7164800	7165000	hyper-methylation	0.231912
1	7444700	7445000	hypo-methylation	-0.296142
1	7469300	7469600	hypo-methylation	-0.250344
1	7499500	7499800	hypo-methylation	-0.434679
1	7500900	7501600	hypo-methylation	-0.545921
1	7505500	7506100	hypo-methylation	-0.515214
1	7616400	7616700	hypo-methylation	-0.289183
1	7800700	7801000	hypo-methylation	-0.277096
1	8601600	8601800	hypo-methylation	-0.358075
1	8636200	8636400	hyper-methylation	0.343896
1	8877000	8877200	hyper-methylation	0.275813
1	9485700	9486200	hypo-methylation	-0.397395
1	9554300	9554700	hypo-methylation	-0.41169
1	9599100	9599300	hypo-methylation	-0.310488
1	9627000	9627800	hypo-methylation	-0.420191
1	9663100	9663700	hypo-methylation	-0.353057
1	9763600	9764000	hypo-methylation	-0.391095
1	9774400	9774700	hypo-methylation	-0.339965
1	9825500	9825800	hypo-methylation	-0.292362
1	9830500	9830800	hypo-methylation	-0.418024
1	9877400	9878000	hypo-methylation	-0.365639
1	9907600	9908000	hypo-methylation	-0.279208
1	9911800	9912000	hypo-methylation	-0.231362
1	9924600	9925000	hypo-methylation	-0.477538
1	10062400	10062800	hypo-methylation	-0.273069
1	10064300	10065300	hypo-methylation	-0.469415
1	10104400	10104900	hypo-methylation	-0.434133
1	10105000	10105300	hypo-methylation	-0.380389
1	10130400	10130800	hypo-methylation	-0.34345
1	10193100	10193200	hypo-methylation	-0.361469
1	10227500	10227900	hypo-methylation	-0.35126
1	10290600	10291000	hypo-methylation	-0.289888
1	10318100	10318200	hypo-methylation	-0.311485
1	10475100	10475400	hypo-methylation	-0.244967
1	10476500	10476700	hypo-methylation	-0.237966
1	10506100	10506600	hypo-methylation	-0.419198
1	10629700	10630300	hypo-methylation	-0.444102
1	10994000	10994900	hypo-methylation	-0.346419
1	11016200	11016600	hypo-methylation	-0.296791
1	11190600	11190800	hyper-methylation	0.325027
1	11476200	11476300	hypo-methylation	-0.292196
1	11652600	11652800	hyper-methylation	0.234333
1	11861000	11861300	hypo-methylation	-0.338417
1	11957300	11958100	hypo-methylation	-0.362588
1	12125700	12125900	hypo-methylation	-0.410116
1	12211300	12211800	hypo-methylation	-0.35255
1	12263900	12264500	hypo-methylation	-0.561098
1	12284600	12285000	hypo-methylation	-0.52065
1	12339000	12339100	hypo-methylation	-0.372513
1	12339200	12339600	hypo-methylation	-0.380238
1	12340100	12340400	hypo-methylation	-0.325943
1	12398800	12399100	hypo-methylation	-0.304655
1	12673900	12674100	hypo-methylation	-0.257058
1	12674300	12674400	hypo-methylation	-0.252008
1	12906300	12906700	hypo-methylation	-0.312277
1	12907500	12908100	hypo-methylation	-0.404111
1	13132000	13132100	hypo-methylation	-0.27545
1	13135000	13135300	hypo-methylation	-0.330828
1	13262600	13263600	hypo-methylation	-0.40801
1	13264000	13264600	hypo-methylation	-0.420023
1	13306300	13306500	hypo-methylation	-0.290137
1	13339600	13339700	hypo-methylation	-0.363706
1	13513200	13513300	hypo-methylation	-0.350374
1	13513400	13513700	hypo-methylation	-0.370974
1	13789100	13789300	hypo-methylation	-0.275125
1	14011600	14012000	hypo-methylation	-0.385781
1	14057800	14058400	hypo-methylation	-0.466706
1	14164400	14164700	hypo-methylation	-0.278256
1	14418300	14418700	hypo-methylation	-0.275252
1	14419500	14419800	hypo-methylation	-0.266106
1	14420200	14421400	hypo-methylation	-0.304883
1	14421700	14423100	hypo-methylation	-0.327072
1	14424700	14425200	hypo-methylation	-0.312423
1	14425500	14425600	hypo-methylation	-0.288346
1	14425700	14426000	hypo-methylation	-0.305984
1	14426200	14426400	hypo-methylation	-0.30452
1	14426500	14427200	hypo-methylation	-0.317188
1	14427300	14427900	hypo-methylation	-0.34584
1	14429300	14430000	hypo-methylation	-0.354256
1	14511200	14511700	hyper-methylation	0.2508
1	15058000	15058300	hypo-methylation	-0.3451
1	15145000	15145600	hypo-methylation	-0.418593
1	15575800	15576100	hypo-methylation	-0.248075
1	15576200	15576400	hypo-methylation	-0.294269
1	16140500	16140800	hypo-methylation	-0.285116
1	16141800	16142300	hypo-methylation	-0.490967
1	16143600	16144000	hypo-methylation	-0.408027
1	16149200	16149300	hypo-methylation	-0.282817
1	16149500	16149600	hypo-methylation	-0.338206
1	16332000	16332400	hyper-methylation	0.31045
1	17393000	17393500	hypo-methylation	-0.437153
1	17484200	17484400	hypo-methylation	-0.287329
1	17495600	17495800	hypo-methylation	-0.346068
1	17497000	17497500	hypo-methylation	-0.282919
1	17589700	17590100	hypo-methylation	-0.345739
1	17590700	17591000	hypo-methylation	-0.352105
1	17591300	17591600	hypo-methylation	-0.337977
1	17592300	17592500	hypo-methylation	-0.329008
1	17611000	17611300	hypo-methylation	-0.300938
1	17687700	17688200	hypo-methylation	-0.371885
1	17695800	17696000	hypo-methylation	-0.44001
1	17795500	17795800	hypo-methylation	-0.486484
1	17865600	17865700	hypo-methylation	-0.444887
1	17958300	17958900	hypo-methylation	-0.33514
1	18041000	18041200	hypo-methylation	-0.44651
1	18064800	18065200	hypo-methylation	-0.492946
1	18099500	18100000	hypo-methylation	-0.447472
1	18100700	18100800	hypo-methylation	-0.411492
1	18297300	18297700	hypo-methylation	-0.349739
1	20504100	20504800	hypo-methylation	-0.46482
1	20911000	20911100	hypo-methylation	-0.244241
1	21875900	21876200	hypo-methylation	-0.25251
1	21876400	21876700	hypo-methylation	-0.267104
1	22145500	22145600	hypo-methylation	-0.476105
1	22246600	22246900	hyper-methylation	0.353971
1	22328100	22328400	hypo-methylation	-0.329491
1	22459200	22459600	hypo-methylation	-0.400736
1	22493500	22493700	hypo-methylation	-0.493327
1	22774500	22775000	hypo-methylation	-0.440771
1	22912200	22912900	hypo-methylation	-0.360116
1	22913000	22913200	hypo-methylation	-0.291633
1	22944300	22944500	hypo-methylation	-0.339844
1	23188100	23188600	hypo-methylation	-0.428295
1	23367200	23367500	hypo-methylation	-0.547334
1	23419000	23419300	hypo-methylation	-0.28831
1	23439500	23440400	hypo-methylation	-0.358581
1	23621300	23621700	hypo-methylation	-0.466708
1	23690000	23690500	hypo-methylation	-0.360402
1	23835000	23835200	hypo-methylation	-0.303075
1	23916800	23917100	hypo-methylation	-0.325408
1	23951500	23951900	hypo-methylation	-0.387985
1	23952500	23952800	hypo-methylation	-0.372018
1	23956100	23956700	hypo-methylation	-0.43503
1	23957100	23957400	hypo-methylation	-0.290758
1	24005300	24005400	hypo-methylation	-0.251944
1	24096200	24096700	hypo-methylation	-0.400968
1	24106200	24106500	hypo-methylation	-0.2887
1	24186500	24186800	hypo-methylation	-0.421575
1	24291100	24291700	hypo-methylation	-0.36346
1	24291800	24292300	hypo-methylation	-0.391653
1	24308800	24309300	hypo-methylation	-0.444901
1	24375200	24375500	hypo-methylation	-0.344463
1	24460100	24460200	hypo-methylation	-0.31145
1	24478700	24479700	hypo-methylation	-0.515989
1	24589700	24590000	hypo-methylation	-0.394578
1	24591800	24592300	hypo-methylation	-0.289392
1	24956800	24957200	hypo-methylation	-0.347232
1	24976400	24976600	hypo-methylation	-0.357183
1	25036900	25037100	hypo-methylation	-0.298712
1	25400000	25400300	hypo-methylation	-0.434771
1	25777400	25777500	hypo-methylation	-0.345391
1	26066100	26066900	hypo-methylation	-0.831858
1	26441600	26441900	hypo-methylation	-0.389022
1	26444000	26444300	hypo-methylation	-0.315625
1	26742100	26742400	hypo-methylation	-0.300381
1	26810200	26810300	hypo-methylation	-0.324663
1	26905900	26906400	hypo-methylation	-0.366609
1	26909900	26910500	hypo-methylation	-0.43757
1	26910800	26911200	hypo-methylation	-0.417759
1	26929600	26930000	hypo-methylation	-0.365571
1	27225000	27225400	hypo-methylation	-0.336141
1	27314400	27314600	hypo-methylation	-0.256142
1	27654400	27654900	hypo-methylation	-0.448974
1	27655000	27655400	hypo-methylation	-0.446682
1	27703000	27703500	hypo-methylation	-0.323952
1	27843700	27844200	hypo-methylation	-0.379415
1	27860700	27860900	hypo-methylation	-0.271062
1	28178000	28178400	hypo-methylation	-0.35477
1	28178900	28179700	hypo-methylation	-0.34351
1	28597300	28597500	hypo-methylation	-0.316043
1	29303100	29303400	hypo-methylation	-0.274093
1	30410100	30410300	hypo-methylation	-0.378059
1	30518900	30519300	hypo-methylation	-0.413452
1	30645400	30645600	hypo-methylation	-0.352623
1	30859800	30860000	hypo-methylation	-0.389491
1	31117700	31118100	hypo-methylation	-0.462477
1	31183500	31183800	hypo-methylation	-0.325585
1	31281000	31281600	hypo-methylation	-0.424138
1	31305600	31306200	hypo-methylation	-0.357766
1	31306300	31306900	hypo-methylation	-0.355898
1	31344000	31344300	hypo-methylation	-0.366348
1	31345100	31345200	hypo-methylation	-0.344275
1	31347900	31348400	hypo-methylation	-0.419623
1	31549700	31550100	hypo-methylation	-0.40791
1	32024800	32024900	hypo-methylation	-0.420056
1	32085500	32085900	hypo-methylation	-0.302708
1	32240700	32241100	hypo-methylation	-0.381916
1	32459800	32460200	hypo-methylation	-0.410145
1	32936500	32936800	hypo-methylation	-0.340875
1	33158600	33159000	hypo-methylation	-0.398568
1	33729800	33730000	hypo-methylation	-0.360625
1	34118900	34119200	hypo-methylation	-0.337704
1	34373800	34374100	hypo-methylation	-0.400976
1	34375200	34375400	hypo-methylation	-0.409625
1	34447100	34447500	hypo-methylation	-0.504266
1	34848300	34848500	hypo-methylation	-0.288071
1	34974600	34975200	hypo-methylation	-0.305381
1	35133900	35134200	hypo-methylation	-0.316748
1	35365500	35365800	hypo-methylation	-0.322192
1	35422300	35422700	hypo-methylation	-0.337166
1	36052200	36052500	hypo-methylation	-0.41255
1	36154100	36154400	hypo-methylation	-0.424454
1	36262300	36262600	hypo-methylation	-0.393852
1	36262900	36263400	hyper-methylation	0.347684
1	36324000	36324500	hypo-methylation	-0.475417
1	36347600	36347900	hypo-methylation	-0.415779
1	36471300	36471600	hypo-methylation	-0.342194
1	36523400	36523600	hypo-methylation	-0.343483
1	36523700	36523900	hyper-methylation	0.268275
1	36700900	36701200	hyper-methylation	0.261954
1	36739500	36740000	hypo-methylation	-0.585171
1	36862100	36862600	hypo-methylation	-0.35715
1	36968900	36969300	hypo-methylation	-0.407248
1	37014900	37015200	hypo-methylation	-0.538158
1	37401600	37402100	hypo-methylation	-0.341172
1	37594700	37595000	hypo-methylation	-0.288428
1	38194500	38194600	hyper-methylation	0.25815
1	38294700	38295200	hypo-methylation	-0.368766
1	38335400	38336900	hypo-methylation	-0.556833
1	38951800	38952300	hypo-methylation	-0.574671
1	38966900	38967100	hypo-methylation	-0.468023
1	39113600	39113900	hypo-methylation	-0.347775
1	39559300	39559600	hypo-methylation	-0.273334
1	39623200	39623600	hypo-methylation	-0.459278
1	39838000	39838300	hypo-methylation	-0.368977
1	40079500	40080100	hypo-methylation	-0.514707
1	40080400	40080800	hypo-methylation	-0.427952
1	40174100	40174700	hypo-methylation	-0.375178
1	40360100	40360400	hypo-methylation	-0.455242
1	40542400	40542600	hypo-methylation	-0.342967
1	40542800	40542900	hypo-methylation	-0.368984
1	40543200	40543300	hypo-methylation	-0.394728
1	40543800	40544500	hypo-methylation	-0.36686
1	40546600	40547600	hypo-methylation	-0.561193
1	40548400	40548900	hypo-methylation	-0.51491
1	40549500	40550000	hypo-methylation	-0.689152
1	40550500	40551000	hypo-methylation	-0.744852
1	41762000	41762300	hypo-methylation	-0.398869
1	42040600	42041100	hypo-methylation	-0.373383
1	42475600	42475800	hypo-methylation	-0.33862
1	42569700	42570500	hypo-methylation	-0.366165
1	42571000	42572500	hypo-methylation	-0.329717
1	43095800	43096100	hypo-methylation	-0.292371
2	342100	342500	hypo-methylation	-0.424683
2	1537600	1537900	hypo-methylation	-0.379386
2	2144700	2145200	hypo-methylation	-0.533582
2	2490100	2490600	hypo-methylation	-0.350923
2	2672200	2672300	hypo-methylation	-0.418351
2	3251000	3251100	hypo-methylation	-0.424964
2	3347800	3348100	hypo-methylation	-0.280859
2	3876600	3876700	hyper-methylation	0.255185
2	3982400	3982500	hyper-methylation	0.293538
2	3983700	3984300	hypo-methylation	-0.345924
2	3984400	3984700	hypo-methylation	-0.343717
2	4770700	4770900	hypo-methylation	-0.284454
2	4874600	4874700	hypo-methylation	-0.252808
2	4879400	4879700	hypo-methylation	-0.503548
2	4960700	4961200	hypo-methylation	-0.429654
2	5075900	5076300	hypo-methylation	-0.344325
2	5135000	5137400	hypo-methylation	-0.609479
2	5296400	5297000	hypo-methylation	-0.380816
2	5703100	5703700	hypo-methylation	-0.464647
2	5743300	5744000	hypo-methylation	-0.54628
2	6170800	6171100	hypo-methylation	-0.280644
2	6240800	6241100	hyper-methylation	0.286725
2	6593000	6593600	hypo-methylation	-0.454252
2	6631500	6631700	hypo-methylation	-0.37446
2	6762000	6762300	hypo-methylation	-0.271859
2	6773000	6774000	hypo-methylation	-0.400508
2	6774700	6775300	hypo-methylation	-0.436564
2	6776000	6776500	hypo-methylation	-0.352018
2	7182300	7182400	hyper-methylation	0.252629
2	7441100	7441500	hypo-methylation	-0.327658
2	7489600	7489800	hypo-methylation	-0.329708
2	7741200	7741400	hyper-methylation	0.304981
2	7778400	7779000	hypo-methylation	-0.39259
2	8175700	8176100	hyper-methylation	0.393854
2	8407500	8407900	hypo-methylation	-0.307025
2	8433500	8433800	hypo-methylation	-0.307976
2	8434600	8435100	hypo-methylation	-0.372028
2	8484400	8484700	hyper-methylation	0.296166
2	8756600	8757000	hypo-methylation	-0.4203
2	8759100	8759400	hypo-methylation	-0.330542
2	9007900	9008300	hypo-methylation	-0.594238
2	9009900	9010200	hypo-methylation	-0.338104
2	9010400	9010800	hypo-methylation	-0.366495
2	9081000	9081200	hypo-methylation	-0.304772
2	9435000	9435200	hypo-methylation	-0.277294
2	9469600	9470000	hypo-methylation	-0.370231
2	9543000	9543900	hypo-methylation	-0.46511
2	9865700	9866100	hyper-methylation	0.308629
2	9874800	9875000	hypo-methylation	-0.425679
2	10061800	10062200	hypo-methylation	-0.290223
2	10104700	10105000	hypo-methylation	-0.289837
2	10128300	10128700	hypo-methylation	-0.268987
2	10137700	10137900	hypo-methylation	-0.268883
2	10170700	10170900	hypo-methylation	-0.282057
2	10789700	10790000	hypo-methylation	-0.352565
2	10851100	10851700	hypo-methylation	-0.375127
2	11111300	11111700	hypo-methylation	-0.454008
2	11114800	11115200	hypo-methylation	-0.2961
2	11194500	11195000	hypo-methylation	-0.535173
2	11195200	11195800	hypo-methylation	-0.372665
2	11397200	11397400	hypo-methylation	-0.266325
2	11405200	11405400	hypo-methylation	-0.315607
2	11688000	11688200	hypo-methylation	-0.255533
2	11688300	11688400	hypo-methylation	-0.299542
2	11690500	11691000	hypo-methylation	-0.388867
2	11691900	11692400	hypo-methylation	-0.337947
2	12035400	12035800	hypo-methylation	-0.433277
2	12035900	12036300	hypo-methylation	-0.329619
2	12036700	12036800	hypo-methylation	-0.381943
2	12048000	12048100	hypo-methylation	-0.299489
2	12146200	12146500	hypo-methylation	-0.346625
2	12211900	12212200	hypo-methylation	-0.409207
2	12228100	12228200	hypo-methylation	-0.240432
2	12269400	12269800	hypo-methylation	-0.266745
2	12354400	12354600	hypo-methylation	-0.337462
2	12354800	12355100	hypo-methylation	-0.347537
2	12355300	12355500	hypo-methylation	-0.368955
2	12361400	12361700	hypo-methylation	-0.347627
2	12396800	12397100	hypo-methylation	-0.297121
2	12423300	12423600	hypo-methylation	-0.297419
2	12424900	12425100	hypo-methylation	-0.329987
2	12425400	12425600	hypo-methylation	-0.301909
2	12425900	12426700	hypo-methylation	-0.320763
2	12537400	12537700	hypo-methylation	-0.330884
2	12538100	12538300	hypo-methylation	-0.258338
2	12541100	12541300	hypo-methylation	-0.270925
2	12605700	12605900	hypo-methylation	-0.378447
2	12606300	12606400	hypo-methylation	-0.376429
2	12607500	12608000	hypo-methylation	-0.390801
2	12627600	12627900	hypo-methylation	-0.393096
2	12628300	12628500	hypo-methylation	-0.4051
2	12673600	12674000	hypo-methylation	-0.314733
2	12730300	12730400	hypo-methylation	-0.265487
2	12934900	12935200	hypo-methylation	-0.303163
2	12964700	12965200	hypo-methylation	-0.324365
2	13058200	13058600	hypo-methylation	-0.318292
2	13143300	13143500	hypo-methylation	-0.542831
2	13196000	13196200	hypo-methylation	-0.54593
2	13319400	13319600	hypo-methylation	-0.494904
2	13376400	13376500	hyper-methylation	0.341367
2	13551800	13552000	hypo-methylation	-0.273553
2	13923200	13923400	hypo-methylation	-0.307759
2	13987600	13987800	hypo-methylation	-0.467886
2	14005500	14005800	hypo-methylation	-0.384169
2	14184600	14184700	hyper-methylation	0.339623
2	14341800	14342300	hypo-methylation	-0.391466
2	14342500	14343800	hypo-methylation	-0.372546
2	14344100	14344800	hypo-methylation	-0.363414
2	14345000	14345500	hypo-methylation	-0.398394
2	14345700	14346000	hypo-methylation	-0.39088
2	14353800	14354100	hyper-methylation	0.277568
2	14546600	14546700	hypo-methylation	-0.35602
2	14593800	14593900	hyper-methylation	0.323134
2	14694600	14694900	hyper-methylation	0.324775
2	14727800	14728300	hypo-methylation	-0.395046
2	14741700	14742600	hypo-methylation	-0.382804
2	14742800	14742900	hypo-methylation	-0.359189
2	14753200	14753500	hypo-methylation	-0.294329
2	14857900	14858400	hypo-methylation	-0.362171
2	14871400	14871900	hypo-methylation	-0.414034
2	14883700	14883800	hyper-methylation	0.241396
2	14977200	14977400	hypo-methylation	-0.328665
2	14991600	14992100	hypo-methylation	-0.460232
2	14992400	14992700	hypo-methylation	-0.414022
2	15046700	15047000	hypo-methylation	-0.297971
2	15130000	15130700	hypo-methylation	-0.346849
2	15130900	15131100	hypo-methylation	-0.338047
2	15135900	15136100	hypo-methylation	-0.332957
2	15395900	15396200	hypo-methylation	-0.260394
2	15463500	15463800	hypo-methylation	-0.281592
2	15492900	15493100	hypo-methylation	-0.51845
2	15537400	15537800	hypo-methylation	-0.363308
2	15575700	15576100	hypo-methylation	-0.367833
2	15622600	15623400	hypo-methylation	-0.346681
2	15656300	15656500	hypo-methylation	-0.348383
2	15680600	15680900	hypo-methylation	-0.237746
2	15712400	15713000	hypo-methylation	-0.363248
2	15780800	15780900	hypo-methylation	-0.35321
2	15835100	15835400	hypo-methylation	-0.719475
2	15923800	15924200	hypo-methylation	-0.311111
2	15980500	15981200	hypo-methylation	-0.528288
2	16181400	16181600	hypo-methylation	-0.310843
2	16188600	16188900	hypo-methylation	-0.315433
2	16220700	16221000	hypo-methylation	-0.378084
2	16272000	16272600	hypo-methylation	-0.365445
2	16326000	16326300	hypo-methylation	-0.420346
2	16498700	16499200	hypo-methylation	-0.476403
2	16502700	16503200	hypo-methylation	-0.486209
2	16624500	16624900	hypo-methylation	-0.309475
2	16843700	16843800	hyper-methylation	0.367491
2	16915900	16916400	hypo-methylation	-0.407148
2	16959900	16961900	hypo-methylation	-0.473844
2	16962000	16962200	hypo-methylation	-0.456822
2	17351400	17351800	hyper-methylation	0.337105
2	17354100	17354400	hyper-methylation	0.315853
2	17460800	17461000	hypo-methylation	-0.379042
2	17508600	17509100	hypo-methylation	-0.427456
2	18076000	18076300	hypo-methylation	-0.311396
2	18469000	18469100	hyper-methylation	0.322465
2	18486200	18486600	hypo-methylation	-0.515567
2	18549100	18550000	hypo-methylation	-0.41837
2	18552400	18552700	hypo-methylation	-0.370468
2	18552800	18553000	hypo-methylation	-0.39253
2	18618900	18619100	hyper-methylation	0.279292
2	18899700	18900000	hypo-methylation	-0.43355
2	19874400	19874900	hypo-methylation	-0.49015
2	20373900	20374000	hyper-methylation	0.275
2	20585300	20585700	hypo-methylation	-0.296771
2	20591300	20591700	hypo-methylation	-0.330698
2	20598700	20598900	hypo-methylation	-0.340674
2	20655800	20655900	hypo-methylation	-0.414385
2	20799700	20800000	hypo-methylation	-0.339202
2	21072800	21073300	hypo-methylation	-0.45229
2	21224100	21224500	hypo-methylation	-0.309225
2	21331700	21332000	hypo-methylation	-0.334453
2	21477900	21478400	hypo-methylation	-0.371825
2	21565300	21565400	hypo-methylation	-0.272598
2	21576700	21577100	hypo-methylation	-0.316887
2	21583400	21583700	hypo-methylation	-0.26418
2	21840300	21840500	hyper-methylation	0.2669
2	21915800	21916100	hypo-methylation	-0.406668
2	21939800	21939900	hyper-methylation	0.268
2	22054400	22054500	hypo-methylation	-0.306241
2	22134000	22134200	hyper-methylation	0.363067
2	22232500	22232700	hypo-methylation	-0.318281
2	22374700	22375000	hypo-methylation	-0.39156
2	22507900	22508400	hypo-methylation	-0.290042
2	22597600	22598100	hypo-methylation	-0.568407
2	23110800	23111400	hypo-methylation	-0.446078
2	23233200	23233400	hypo-methylation	-0.361336
2	23670400	23670600	hypo-methylation	-0.290496
2	23674100	23674300	hypo-methylation	-0.327607
2	23674600	23674800	hypo-methylation	-0.314381
2	23787400	23788100	hypo-methylation	-0.457803
2	23848200	23848500	hypo-methylation	-0.343675
2	23919400	23919700	hypo-methylation	-0.505421
2	23921200	23922100	hypo-methylation	-0.377096
2	23924900	23925700	hypo-methylation	-0.502193
2	23926300	23926800	hypo-methylation	-0.728908
2	23933500	23934000	hypo-methylation	-0.639996
2	24123400	24123500	hypo-methylation	-0.550152
2	24123800	24124000	hypo-methylation	-0.470044
2	24129900	24130200	hyper-methylation	0.259391
2	24147100	24147600	hypo-methylation	-0.39141
2	24860300	24860600	hypo-methylation	-0.251354
2	25114200	25114400	hypo-methylation	-0.253004
2	25507200	25507600	hyper-methylation	0.294625
2	25519200	25519600	hypo-methylation	-0.336903
2	25657100	25657200	hyper-methylation	0.289658
2	25692300	25692900	hypo-methylation	-0.551166
2	25748200	25748400	hypo-methylation	-0.296993
2	25822500	25822800	hypo-methylation	-0.697688
2	25888700	25889500	hypo-methylation	-0.451369
2	26214100	26215100	hypo-methylation	-0.450906
2	26417500	26418000	hypo-methylation	-0.306503
2	26783200	26783700	hypo-methylation	-0.348228
2	27057700	27057900	hypo-methylation	-0.3501
2	27112800	27113300	hypo-methylation	-0.352296
2	27252300	27252600	hypo-methylation	-0.25761
2	27309900	27310400	hypo-methylation	-0.384827
2	27357500	27358000	hypo-methylation	-0.46324
2	27450000	27450300	hypo-methylation	-0.338554
2	27478400	27479200	hypo-methylation	-0.643606
2	27554300	27554600	hypo-methylation	-0.360117
2	30077900	30078400	hypo-methylation	-0.302978
2	30592600	30592800	hypo-methylation	-0.543046
2	30648700	30649100	hypo-methylation	-0.381164
2	30649200	30649600	hypo-methylation	-0.372101
2	31133600	31133900	hypo-methylation	-0.275908
2	31134100	31134200	hypo-methylation	-0.29342
2	31135800	31135900	hypo-methylation	-0.274453
2	31136800	31137100	hypo-methylation	-0.309937
2	31293700	31294000	hypo-methylation	-0.545239
2	31295000	31295300	hypo-methylation	-0.480458
2	31375200	31375500	hypo-methylation	-0.394108
2	31547100	31547200	hypo-methylation	-0.370543
2	31547700	31547900	hypo-methylation	-0.348037
2	31658400	31658700	hypo-methylation	-0.415992
2	32091900	32092400	hypo-methylation	-0.317222
2	32334700	32335100	hypo-methylation	-0.295016
2	33048500	33048700	hypo-methylation	-0.353144
2	33052900	33053400	hypo-methylation	-0.6216
2	33157300	33157600	hypo-methylation	-0.564708
2	33160500	33160900	hypo-methylation	-0.344318
2	33399200	33399600	hypo-methylation	-0.415672
2	33417600	33418100	hypo-methylation	-0.362521
2	33418500	33419000	hypo-methylation	-0.389154
2	33419200	33419700	hypo-methylation	-0.385198
2	33552600	33552700	hypo-methylation	-0.408616
2	33698800	33699300	hypo-methylation	-0.466908
2	33699400	33700000	hypo-methylation	-0.456896
2	33730600	33731100	hypo-methylation	-0.316929
2	33815400	33815600	hypo-methylation	-0.440272
2	33820700	33820900	hypo-methylation	-0.34946
2	33982100	33982500	hypo-methylation	-0.371576
2	34166100	34166500	hypo-methylation	-0.346548
2	34324300	34324800	hypo-methylation	-0.321771
2	34643500	34643800	hypo-methylation	-0.375412
2	35049900	35050100	hypo-methylation	-0.282425
2	35292900	35293200	hypo-methylation	-0.434207
3	588400	588700	hypo-methylation	-0.316245
3	631500	632000	hypo-methylation	-0.323766
3	963700	963800	hypo-methylation	-0.257452
3	1274600	1275000	hypo-methylation	-0.589466
3	1275100	1275600	hypo-methylation	-0.554899
3	1277200	1278200	hypo-methylation	-0.641402
3	1281000	1281400	hypo-methylation	-0.7145
3	1281500	1282700	hypo-methylation	-0.643979
3	1283500	1284000	hypo-methylation	-0.267623
3	1284400	1284600	hypo-methylation	-0.269415
3	1285200	1285700	hypo-methylation	-0.384092
3	1286800	1287000	hypo-methylation	-0.361458
3	1287100	1287500	hypo-methylation	-0.321819
3	1289800	1290500	hypo-methylation	-0.56911
3	1290600	1291000	hypo-methylation	-0.494655
3	1291200	1291700	hypo-methylation	-0.368596
3	1292300	1292800	hypo-methylation	-0.384175
3	1294200	1294800	hypo-methylation	-0.524347
3	1641000	1641500	hypo-methylation	-0.376316
3	2365000	2365400	hypo-methylation	-0.424054
3	2668100	2668200	hypo-methylation	-0.297725
3	2716500	2716900	hypo-methylation	-0.343326
3	2972900	2973800	hypo-methylation	-0.530995
3	3614100	3614300	hypo-methylation	-0.465162
3	4078700	4079400	hypo-methylation	-0.476087
3	4213300	4213800	hypo-methylation	-0.413405
3	4455600	4456100	hypo-methylation	-0.443246
3	4456200	4456300	hypo-methylation	-0.401177
3	4466900	4467400	hypo-methylation	-0.345708
3	4468600	4469100	hypo-methylation	-0.391773
3	4714500	4714900	hypo-methylation	-0.536994
3	5044200	5044700	hypo-methylation	-0.414013
3	5238000	5238400	hyper-methylation	0.270319
3	5427000	5427200	hypo-methylation	-0.313371
3	5577700	5578200	hypo-methylation	-0.410354
3	5630800	5631200	hypo-methylation	-0.302808
3	5791000	5791400	hypo-methylation	-0.42798
3	5793900	5794200	hypo-methylation	-0.26915
3	5905800	5906300	hypo-methylation	-0.319435
3	5940600	5941100	hypo-methylation	-0.537261
3	6510600	6510700	hypo-methylation	-0.358954
3	6819500	6819700	hypo-methylation	-0.338786
3	7073800	7074200	hypo-methylation	-0.363741
3	7255300	7255800	hypo-methylation	-0.414648
3	7696000	7696300	hypo-methylation	-0.382142
3	7781200	7781500	hypo-methylation	-0.441978
3	7835400	7835900	hypo-methylation	-0.343086
3	7943000	7943300	hypo-methylation	-0.364684
3	7943400	7943900	hypo-methylation	-0.372275
3	8839500	8840000	hypo-methylation	-0.448159
3	8968100	8968400	hypo-methylation	-0.408396
3	9137600	9138000	hypo-methylation	-0.2229
3	9283500	9284200	hypo-methylation	-0.30996
3	9300900	9301100	hypo-methylation	-0.36815
3	9433700	9434200	hypo-methylation	-0.423592
3	9462100	9462400	hypo-methylation	-0.27794
3	9464700	9465200	hypo-methylation	-0.356873
3	9471200	9471500	hypo-methylation	-0.329026
3	9511600	9511900	hypo-methylation	-0.358297
3	9643800	9644200	hypo-methylation	-0.389692
3	9774800	9775000	hypo-methylation	-0.344027
3	9943200	9943700	hypo-methylation	-0.338677
3	10061000	10061500	hypo-methylation	-0.2786
3	10409000	10409300	hypo-methylation	-0.280289
3	11016800	11017000	hypo-methylation	-0.2663
3	11019400	11019700	hypo-methylation	-0.404312
3	11100200	11100400	hypo-methylation	-0.31923
3	11190000	11190300	hypo-methylation	-0.39278
3	11191500	11191600	hypo-methylation	-0.273296
3	11198000	11198300	hypo-methylation	-0.464302
3	11364000	11364300	hypo-methylation	-0.283331
3	11364400	11364500	hypo-methylation	-0.290882
3	11560800	11560900	hypo-methylation	-0.322675
3	11561000	11561400	hypo-methylation	-0.3281
3	11593800	11594400	hypo-methylation	-0.504888
3	11783400	11783700	hypo-methylation	-0.28395
3	11826700	11827100	hypo-methylation	-0.300527
3	12158900	12159100	hypo-methylation	-0.430607
3	12324600	12324800	hyper-methylation	0.340244
3	12338900	12339600	hypo-methylation	-0.450895
3	12339700	12340000	hypo-methylation	-0.402807
3	12505000	12505700	hypo-methylation	-0.576295
3	12507300	12507900	hypo-methylation	-0.284799
3	12540800	12541100	hypo-methylation	-0.622467
3	12634300	12634600	hypo-methylation	-0.333018
3	12710400	12710600	hypo-methylation	-0.311535
3	13147400	13147600	hypo-methylation	-0.268725
3	13151600	13152000	hypo-methylation	-0.298565
3	13225800	13226300	hypo-methylation	-0.411339
3	13234200	13234600	hypo-methylation	-0.365629
3	13235000	13235900	hypo-methylation	-0.49231
3	13648900	13649900	hypo-methylation	-0.58424
3	13657700	13658100	hypo-methylation	-0.380615
3	13829800	13830100	hypo-methylation	-0.325575
3	13907500	13908000	hypo-methylation	-0.42592
3	13908600	13909000	hypo-methylation	-0.312529
3	13925800	13926200	hypo-methylation	-0.42876
3	13972500	13972700	hypo-methylation	-0.272038
3	14005100	14005500	hypo-methylation	-0.455632
3	14022500	14022700	hyper-methylation	0.300198
3	14310900	14311200	hypo-methylation	-0.303523
3	14540700	14541200	hypo-methylation	-0.496007
3	14652600	14653100	hypo-methylation	-0.368345
3	14897400	14898100	hypo-methylation	-0.407607
3	14933400	14933900	hypo-methylation	-0.377246
3	15024200	15024500	hypo-methylation	-0.326361
3	15047200	15047700	hypo-methylation	-0.309713
3	15135000	15135300	hypo-methylation	-0.332554
3	15148200	15148400	hyper-methylation	0.302472
3	15407600	15407900	hypo-methylation	-0.309102
3	15409200	15409700	hypo-methylation	-0.479853
3	15625100	15625800	hypo-methylation	-0.461853
3	15742800	15743100	hypo-methylation	-0.345121
3	15953600	15953900	hypo-methylation	-0.365948
3	15979600	15980100	hypo-methylation	-0.461047
3	16019900	16020200	hypo-methylation	-0.42949
3	16021700	16022300	hypo-methylation	-0.396194
3	16413100	16413500	hypo-methylation	-0.428136
3	16417000	16417500	hypo-methylation	-0.317143
3	16489800	16490000	hyper-methylation	0.284704
3	16511900	16512100	hyper-methylation	0.285359
3	17168700	17169000	hypo-methylation	-0.283806
3	17296400	17297300	hypo-methylation	-0.383881
3	17301100	17301400	hypo-methylation	-0.359494
3	17389200	17389600	hypo-methylation	-0.34175
3	17431200	17431500	hypo-methylation	-0.310791
3	17432000	17432600	hypo-methylation	-0.43076
3	17711400	17711800	hypo-methylation	-0.38454
3	17723700	17724000	hypo-methylation	-0.38068
3	17866200	17867200	hypo-methylation	-0.335944
3	17868500	17869000	hypo-methylation	-0.297032
3	17970800	17971200	hypo-methylation	-0.284764
3	18006300	18006600	hypo-methylation	-0.402556
3	18007800	18008200	hypo-methylation	-0.28045
3	18010200	18010600	hypo-methylation	-0.354913
3	18012100	18012600	hypo-methylation	-0.393271
3	18030700	18031100	hypo-methylation	-0.448484
3	18031200	18031700	hypo-methylation	-0.45308
3	18077700	18078000	hypo-methylation	-0.3226
3	18078400	18078700	hypo-methylation	-0.343379
3	18083100	18083300	hypo-methylation	-0.30293
3	18144800	18145200	hypo-methylation	-0.370919
3	18179000	18179200	hypo-methylation	-0.337334
3	18221400	18221800	hypo-methylation	-0.295651
3	18275700	18275800	hyper-methylation	0.339828
3	18467400	18467800	hypo-methylation	-0.35292
3	18683100	18683300	hypo-methylation	-0.323669
3	18689700	18689800	hypo-methylation	-0.293482
3	18689900	18690100	hypo-methylation	-0.325486
3	18691400	18691600	hypo-methylation	-0.340892
3	18885900	18886300	hypo-methylation	-0.545578
3	19049900	19050000	hyper-methylation	0.32243
3	19094300	19094400	hyper-methylation	0.327448
3	19193800	19194200	hypo-methylation	-0.326415
3	19527400	19527900	hypo-methylation	-0.454296
3	19700500	19700600	hypo-methylation	-0.287932
3	19719000	19719400	hypo-methylation	-0.357885
3	19903200	19903400	hypo-methylation	-0.291663
3	20128400	20128700	hypo-methylation	-0.253763
3	20202400	20202600	hyper-methylation	0.28675
3	20387900	20388300	hypo-methylation	-0.544918
3	20402100	20402400	hypo-methylation	-0.356658
3	20429300	20429600	hypo-methylation	-0.313831
3	20547300	20547600	hypo-methylation	-0.413011
3	20695600	20696000	hypo-methylation	-0.337994
3	20698800	20699200	hypo-methylation	-0.33959
3	20706600	20706900	hypo-methylation	-0.330314
3	20708600	20708900	hypo-methylation	-0.414229
3	20709900	20710200	hypo-methylation	-0.2379
3	20753600	20753700	hyper-methylation	0.251242
3	20903200	20904200	hypo-methylation	-0.526281
3	20905200	20905300	hypo-methylation	-0.261023
3	20957100	20957500	hypo-methylation	-0.3386
3	20963600	20964000	hypo-methylation	-0.296689
3	21021500	21022000	hypo-methylation	-0.418144
3	21100800	21101700	hypo-methylation	-0.366596
3	21114500	21115100	hypo-methylation	-0.364248
3	21186800	21187100	hypo-methylation	-0.32605
3	21211600	21212000	hypo-methylation	-0.463635
3	21428500	21429000	hypo-methylation	-0.467344
3	21430100	21430600	hypo-methylation	-0.434951
3	21629200	21629400	hypo-methylation	-0.398643
3	21680900	21681400	hypo-methylation	-0.458845
3	21753400	21753700	hypo-methylation	-0.391505
3	21754000	21754400	hypo-methylation	-0.470552
3	22231100	22231600	hypo-methylation	-0.403369
3	22269900	22270100	hypo-methylation	-0.297954
3	22304200	22304400	hypo-methylation	-0.329025
3	22487100	22487300	hypo-methylation	-0.344056
3	22593100	22593200	hypo-methylation	-0.298843
3	22623500	22623700	hypo-methylation	-0.339225
3	22684200	22684500	hypo-methylation	-0.274686
3	22747300	22747800	hypo-methylation	-0.370233
3	22747900	22748500	hypo-methylation	-0.39719
3	23005000	23005800	hypo-methylation	-0.399888
3	23006100	23006700	hypo-methylation	-0.396518
3	23114700	23115300	hypo-methylation	-0.418077
3	23126300	23126700	hypo-methylation	-0.446308
3	23677400	23677600	hypo-methylation	-0.328429
3	23795400	23795900	hypo-methylation	-0.701819
3	23808700	23809000	hypo-methylation	-0.477031
3	23809100	23809400	hypo-methylation	-0.418106
3	23854100	23854500	hypo-methylation	-0.305346
3	23920900	23921300	hypo-methylation	-0.312308
3	23923900	23924400	hypo-methylation	-0.393056
3	24010700	24011000	hypo-methylation	-0.437787
3	24182500	24182800	hypo-methylation	-0.289648
3	24182900	24183000	hypo-methylation	-0.318944
3	24183500	24183700	hypo-methylation	-0.373966
3	24184300	24184800	hypo-methylation	-0.454395
3	24185200	24185400	hypo-methylation	-0.383993
3	24186200	24186500	hypo-methylation	-0.27074
3	24283000	24283300	hypo-methylation	-0.343325
3	24462200	24462700	hypo-methylation	-0.329273
3	24588100	24588300	hypo-methylation	-0.37363
3	24589500	24589800	hyper-methylation	0.317047
3	24609400	24609800	hypo-methylation	-0.368531
3	25053500	25053900	hypo-methylation	-0.446611
3	25097700	25098000	hypo-methylation	-0.374885
3	26616200	26616300	hypo-methylation	-0.291409
3	26693300	26693500	hypo-methylation	-0.278309
3	26860100	26860700	hypo-methylation	-0.374294
3	26975900	26976200	hypo-methylation	-0.322033
3	27295500	27295800	hypo-methylation	-0.368463
3	27369900	27370100	hypo-methylation	-0.391883
3	27370200	27370400	hypo-methylation	-0.408408
3	28002700	28003000	hypo-methylation	-0.378153
3	28413500	28413800	hypo-methylation	-0.278881
3	28418400	28418800	hypo-methylation	-0.338879
3	29083400	29083600	hypo-methylation	-0.266071
3	29247000	29247300	hypo-methylation	-0.342863
3	29551700	29552100	hypo-methylation	-0.401643
3	29671400	29671600	hypo-methylation	-0.269055
3	29722400	29723200	hypo-methylation	-0.529494
3	29752100	29752900	hypo-methylation	-0.464967
3	29753000	29753200	hypo-methylation	-0.468731
3	29813900	29814300	hypo-methylation	-0.316995
3	30066900	30067200	hypo-methylation	-0.371671
3	30174200	30174500	hypo-methylation	-0.321821
3	30242800	30243100	hypo-methylation	-0.361152
3	30512500	30513000	hypo-methylation	-0.282122
3	31957600	31957900	hypo-methylation	-0.261842
3	32713000	32713400	hypo-methylation	-0.336403
3	32916600	32916900	hypo-methylation	-0.380288
3	33151800	33152400	hypo-methylation	-0.327234
3	33238300	33239800	hypo-methylation	-0.393081
3	33299800	33299900	hypo-methylation	-0.264343
3	34492000	34492200	hypo-methylation	-0.39801
3	35535900	35536400	hypo-methylation	-0.556694
3	35537800	35538200	hypo-methylation	-0.522817
3	35578000	35578100	hypo-methylation	-0.279679
3	35838600	35838900	hypo-methylation	-0.336642
3	36008500	36009000	hypo-methylation	-0.54395
3	36228100	36228400	hypo-methylation	-0.54104
4	70400	70700	hypo-methylation	-0.257383
4	712000	712500	hypo-methylation	-0.579898
4	1020000	1020500	hypo-methylation	-0.548315
4	1856800	1857100	hypo-methylation	-0.363694
4	2032200	2032600	hypo-methylation	-0.394149
4	3564300	3564600	hypo-methylation	-0.326412
4	4267700	4267800	hyper-methylation	0.272529
4	5494400	5494500	hypo-methylation	-0.274811
4	5495900	5496300	hypo-methylation	-0.319755
4	5564200	5564300	hyper-methylation	0.266483
4	5575300	5575500	hyper-methylation	0.300249
4	5978100	5978400	hypo-methylation	-0.330083
4	6101500	6102300	hypo-methylation	-0.380846
4	6271800	6272100	hypo-methylation	-0.265175
4	6368700	6368900	hyper-methylation	0.315666
4	6696800	6697100	hypo-methylation	-0.476117
4	6836600	6837100	hypo-methylation	-0.284204
4	7293300	7293500	hyper-methylation	0.31745
4	7501700	7502200	hypo-methylation	-0.355762
4	7502400	7502900	hypo-methylation	-0.502519
4	8505100	8505400	hypo-methylation	-0.3223
4	8595000	8595300	hypo-methylation	-0.290274
4	8595400	8595500	hypo-methylation	-0.282999
4	8768100	8769300	hypo-methylation	-0.476558
4	8879000	8879300	hyper-methylation	0.269975
4	8884400	8884800	hypo-methylation	-0.278122
4	9406500	9406600	hyper-methylation	0.264027
4	9680500	9681000	hypo-methylation	-0.352318
4	9879500	9879700	hyper-methylation	0.264369
4	9880000	9880200	hyper-methylation	0.238911
4	9917100	9917700	hypo-methylation	-0.300245
4	9957900	9959200	hypo-methylation	-0.422249
4	10688800	10689300	hypo-methylation	-0.368688
4	10698500	10698900	hypo-methylation	-0.444467
4	10762100	10762500	hypo-methylation	-0.311211
4	10783600	10783900	hyper-methylation	0.285393
4	11085400	11085700	hypo-methylation	-0.293227
4	11329300	11329400	hypo-methylation	-0.342983
4	11331800	11332300	hypo-methylation	-0.37841
4	11333000	11333600	hypo-methylation	-0.414289
4	11395400	11395900	hypo-methylation	-0.301139
4	11474900	11475100	hypo-methylation	-0.33709
4	11544700	11545200	hypo-methylation	-0.340429
4	11652100	11652200	hypo-methylation	-0.447541
4	11653900	11656000	hypo-methylation	-0.503999
4	11656500	11656800	hypo-methylation	-0.327533
4	11658100	11658300	hypo-methylation	-0.352191
4	12054100	12054300	hypo-methylation	-0.259883
4	12133000	12133600	hypo-methylation	-0.395427
4	12599600	12600200	hypo-methylation	-0.319276
4	13226100	13226400	hypo-methylation	-0.244402
4	13233400	13233600	hypo-methylation	-0.435893
4	13625300	13625700	hypo-methylation	-0.385614
4	13801600	13801800	hypo-methylation	-0.341054
4	13831300	13831700	hypo-methylation	-0.494007
4	13947300	13947600	hypo-methylation	-0.464896
4	14075500	14075900	hypo-methylation	-0.355229
4	14076400	14076500	hypo-methylation	-0.366579
4	14138900	14139800	hypo-methylation	-0.48353
4	14525200	14525700	hypo-methylation	-0.53904
4	15076200	15076400	hyper-methylation	0.291087
4	16462600	16462700	hypo-methylation	-0.406118
4	16492500	16492800	hypo-methylation	-0.458314
4	18630500	18630600	hypo-methylation	-0.331087
4	18673300	18673800	hypo-methylation	-0.353592
4	18674000	18674200	hypo-methylation	-0.272292
4	18674700	18674900	hypo-methylation	-0.238454
4	18697300	18697800	hypo-methylation	-0.283836
4	18766300	18766500	hypo-methylation	-0.334265
4	18898000	18898500	hypo-methylation	-0.314868
4	19205100	19205300	hypo-methylation	-0.369013
4	19276500	19276700	hypo-methylation	-0.27786
4	19536600	19537000	hypo-methylation	-0.398089
4	19773500	19773700	hypo-methylation	-0.339996
4	19932100	19932700	hypo-methylation	-0.425855
4	20187200	20187400	hypo-methylation	-0.300733
4	20187500	20187800	hypo-methylation	-0.320087
4	20363200	20363400	hypo-methylation	-0.350892
4	20761600	20762100	hypo-methylation	-0.524219
4	20762600	20763800	hypo-methylation	-0.509706
4	20860600	20861100	hypo-methylation	-0.288832
4	20952900	20953400	hypo-methylation	-0.46389
4	21569000	21569100	hyper-methylation	0.30553
4	21868300	21868600	hypo-methylation	-0.405206
4	22050300	22050600	hypo-methylation	-0.250419
4	22242700	22242900	hypo-methylation	-0.323217
4	22420000	22420700	hypo-methylation	-0.380784
4	22421500	22421700	hypo-methylation	-0.529275
4	22886500	22886900	hypo-methylation	-0.464599
4	23524100	23524500	hypo-methylation	-0.374673
4	23524700	23525600	hypo-methylation	-0.378041
4	23547600	23547700	hypo-methylation	-0.42895
4	23549900	23550200	hypo-methylation	-0.325712
4	23561400	23562200	hypo-methylation	-0.438179
4	23563600	23563900	hypo-methylation	-0.40266
4	23839600	23840200	hypo-methylation	-0.352903
4	24523000	24523100	hypo-methylation	-0.29264
4	24574600	24575000	hypo-methylation	-0.405542
4	24575100	24575400	hypo-methylation	-0.415104
4	24575700	24576200	hypo-methylation	-0.466174
4	24576300	24576900	hypo-methylation	-0.420739
4	24577500	24578000	hypo-methylation	-0.361564
4	24579500	24579800	hypo-methylation	-0.388127
4	24833000	24833400	hypo-methylation	-0.438891
4	25029000	25029200	hypo-methylation	-0.305741
4	25047100	25047500	hypo-methylation	-0.456392
4	25047700	25048000	hypo-methylation	-0.249254
4	25117900	25118100	hypo-methylation	-0.360116
4	26280800	26280900	hypo-methylation	-0.321491
4	26281700	26282100	hypo-methylation	-0.296246
4	26312900	26313300	hypo-methylation	-0.329759
4	27178200	27178800	hyper-methylation	0.393593
4	27248000	27248100	hypo-methylation	-0.396596
4	27248600	27248900	hypo-methylation	-0.359568
4	27380100	27380300	hypo-methylation	-0.238519
4	27481200	27481600	hypo-methylation	-0.340357
4	27501400	27501700	hypo-methylation	-0.450745
4	27623400	27623900	hypo-methylation	-0.398948
4	27624400	27624900	hypo-methylation	-0.515984
4	27862500	27862800	hypo-methylation	-0.31609
4	28340200	28340600	hypo-methylation	-0.453089
4	28378800	28379100	hypo-methylation	-0.343012
4	31838800	31839200	hypo-methylation	-0.376479
4	32609100	32609600	hypo-methylation	-0.310198
4	32814000	32814900	hypo-methylation	-0.471884
4	33005200	33005600	hypo-methylation	-0.41677
4	33230500	33231100	hypo-methylation	-0.469112
4	33438900	33439400	hypo-methylation	-0.477319
4	34015200	34015600	hypo-methylation	-0.381875
4	34737100	34737300	hypo-methylation	-0.2678
4	34973800	34974100	hypo-methylation	-0.319725
4	35175500	35176000	hypo-methylation	-0.534867
4	35492700	35493300	hypo-methylation	-0.530601
5	50700	51100	hypo-methylation	-0.36022
5	89800	90300	hypo-methylation	-0.404647
5	134800	135000	hypo-methylation	-0.411354
5	152600	152900	hypo-methylation	-0.297175
5	461200	461600	hypo-methylation	-0.335302
5	469800	470100	hypo-methylation	-0.288162
5	886800	887300	hypo-methylation	-0.450805
5	1139100	1139700	hypo-methylation	-0.406525
5	1170200	1170700	hypo-methylation	-0.584106
5	1191400	1192200	hypo-methylation	-0.565659
5	1513200	1513800	hypo-methylation	-0.474366
5	1566300	1566800	hypo-methylation	-0.313941
5	1649700	1650100	hypo-methylation	-0.402201
5	1650200	1650400	hypo-methylation	-0.346769
5	1967900	1968200	hypo-methylation	-0.424643
5	1968900	1970100	hypo-methylation	-0.41608
5	2054200	2054500	hypo-methylation	-0.30582
5	2105200	2105700	hypo-methylation	-0.351633
5	2343300	2343800	hypo-methylation	-0.319231
5	2670800	2671000	hypo-methylation	-0.290521
5	2679600	2679900	hypo-methylation	-0.318634
5	2841100	2841800	hypo-methylation	-0.44185
5	2844900	2845300	hypo-methylation	-0.370525
5	3516800	3517100	hypo-methylation	-0.328583
5	3781600	3781800	hypo-methylation	-0.485803
5	4323400	4324100	hypo-methylation	-0.483306
5	4553700	4554200	hypo-methylation	-0.397514
5	4747700	4747800	hypo-methylation	-0.354087
5	5436600	5437000	hypo-methylation	-0.394731
5	5962100	5962500	hypo-methylation	-0.350693
5	6088700	6089100	hypo-methylation	-0.469083
5	6321000	6321200	hypo-methylation	-0.297067
5	6747400	6747900	hypo-methylation	-0.337638
5	6758000	6758200	hypo-methylation	-0.428266
5	6992200	6992400	hypo-methylation	-0.326458
5	7111400	7111800	hypo-methylation	-0.34466
5	7248200	7248700	hypo-methylation	-0.310913
5	7395200	7395400	hypo-methylation	-0.443841
5	7467600	7467900	hypo-methylation	-0.331602
5	7471300	7471700	hypo-methylation	-0.285912
5	7471800	7472100	hypo-methylation	-0.279724
5	7472300	7472900	hypo-methylation	-0.439862
5	7506100	7506200	hyper-methylation	0.269832
5	7773700	7774000	hypo-methylation	-0.326118
5	8401200	8401500	hypo-methylation	-0.275037
5	8989700	8990100	hypo-methylation	-0.238406
5	9693100	9693400	hypo-methylation	-0.333759
5	13581100	13581300	hyper-methylation	0.341162
5	13593700	13594100	hypo-methylation	-0.323063
5	13829300	13829800	hypo-methylation	-0.421475
5	13882200	13882800	hypo-methylation	-0.363768
5	14088500	14088800	hypo-methylation	-0.292021
5	14169400	14169800	hypo-methylation	-0.346764
5	14236100	14236400	hyper-methylation	0.311298
5	14273900	14274100	hypo-methylation	-0.408842
5	14473000	14473200	hyper-methylation	0.264618
5	14608100	14608400	hypo-methylation	-0.391917
5	14835400	14835700	hypo-methylation	-0.300598
5	15011000	15011200	hypo-methylation	-0.265937
5	15013800	15014100	hypo-methylation	-0.275122
5	15138400	15139100	hypo-methylation	-0.38536
5	15139200	15139300	hypo-methylation	-0.385223
5	15139500	15139700	hypo-methylation	-0.374087
5	15140300	15140500	hypo-methylation	-0.349229
5	15140600	15140700	hypo-methylation	-0.346606
5	15141500	15141600	hypo-methylation	-0.341971
5	15184000	15184300	hypo-methylation	-0.250648
5	15185600	15186100	hypo-methylation	-0.371058
5	15186700	15187400	hypo-methylation	-0.339047
5	15588300	15588600	hypo-methylation	-0.343732
5	15590000	15590500	hypo-methylation	-0.526139
5	15743300	15743600	hypo-methylation	-0.343468
5	15749400	15749500	hypo-methylation	-0.277467
5	15882200	15882500	hypo-methylation	-0.276617
5	15929900	15930100	hypo-methylation	-0.363082
5	16000700	16001000	hypo-methylation	-0.364935
5	16007200	16007500	hypo-methylation	-0.343302
5	16266100	16266200	hypo-methylation	-0.277359
5	16274500	16275100	hypo-methylation	-0.520368
5	16283500	16283600	hypo-methylation	-0.380817
5	16286200	16286400	hypo-methylation	-0.265018
5	16347700	16348100	hypo-methylation	-0.465901
5	16373100	16373300	hypo-methylation	-0.29455
5	16395000	16395100	hyper-methylation	0.243553
5	16565600	16565800	hypo-methylation	-0.296813
5	16596400	16596900	hypo-methylation	-0.413019
5	16626200	16626700	hypo-methylation	-0.464576
5	16654800	16655400	hypo-methylation	-0.366142
5	16660600	16660800	hypo-methylation	-0.363762
5	16661600	16662100	hypo-methylation	-0.362916
5	16684500	16684900	hypo-methylation	-0.254965
5	16695300	16695800	hypo-methylation	-0.33467
5	16695900	16696000	hypo-methylation	-0.366034
5	16790800	16791000	hypo-methylation	-0.26705
5	17097800	17097900	hypo-methylation	-0.342925
5	17217400	17217900	hypo-methylation	-0.390191
5	17351800	17352100	hypo-methylation	-0.332975
5	17352500	17352800	hypo-methylation	-0.341969
5	17433800	17434200	hypo-methylation	-0.373816
5	17438100	17438400	hypo-methylation	-0.306062
5	17440700	17441100	hypo-methylation	-0.337811
5	17458600	17458800	hypo-methylation	-0.266852
5	17494900	17495300	hypo-methylation	-0.383236
5	17868000	17868500	hypo-methylation	-0.481113
5	17874300	17874500	hypo-methylation	-0.416246
5	17920900	17921100	hypo-methylation	-0.405907
5	17921200	17921800	hypo-methylation	-0.397732
5	17937000	17937500	hypo-methylation	-0.281452
5	17973100	17973400	hypo-methylation	-0.391346
5	18024800	18025200	hypo-methylation	-0.316975
5	18089100	18089400	hypo-methylation	-0.297906
5	18203000	18203400	hypo-methylation	-0.278958
5	18243500	18244100	hypo-methylation	-0.30728
5	18269200	18269500	hypo-methylation	-0.389263
5	18737200	18737700	hypo-methylation	-0.327053
5	18889000	18889300	hypo-methylation	-0.318969
5	18890900	18891300	hypo-methylation	-0.232797
5	18947000	18947300	hypo-methylation	-0.30347
5	18971700	18972200	hypo-methylation	-0.367933
5	19070000	19070500	hypo-methylation	-0.477016
5	19080500	19080800	hypo-methylation	-0.283771
5	19246200	19246500	hypo-methylation	-0.339489
5	19253900	19254200	hypo-methylation	-0.389725
5	19386200	19386500	hypo-methylation	-0.435631
5	19387100	19387300	hypo-methylation	-0.307502
5	19956000	19956300	hypo-methylation	-0.308226
5	19974600	19975100	hypo-methylation	-0.483448
5	19981400	19981900	hypo-methylation	-0.398491
5	19982300	19983100	hypo-methylation	-0.462799
5	20056000	20056400	hyper-methylation	0.311534
5	20170100	20170600	hypo-methylation	-0.381304
5	20301300	20301800	hypo-methylation	-0.492371
5	20381800	20381900	hypo-methylation	-0.267296
5	20389500	20389600	hypo-methylation	-0.2915
5	20458900	20459500	hypo-methylation	-0.435585
5	20524800	20525000	hypo-methylation	-0.317022
5	20674900	20675200	hypo-methylation	-0.3496
5	20675400	20676400	hypo-methylation	-0.38171
5	20700300	20700800	hypo-methylation	-0.305277
5	20718700	20719100	hypo-methylation	-0.343903
5	20765700	20766500	hypo-methylation	-0.379428
5	20962300	20962600	hypo-methylation	-0.394782
5	21222800	21223300	hypo-methylation	-0.377798
5	21272900	21273300	hypo-methylation	-0.280837
5	21646700	21647200	hypo-methylation	-0.368208
5	21649900	21650000	hypo-methylation	-0.324597
5	21689300	21689600	hypo-methylation	-0.371047
5	21689800	21689900	hypo-methylation	-0.422544
5	21763300	21763700	hypo-methylation	-0.359733
5	21912200	21912600	hypo-methylation	-0.470241
5	22392900	22393000	hypo-methylation	-0.360223
5	22472500	22473000	hypo-methylation	-0.49152
5	22552800	22553000	hypo-methylation	-0.310543
5	22606800	22606900	hypo-methylation	-0.336888
5	22786600	22787100	hypo-methylation	-0.456966
5	23914200	23914300	hypo-methylation	-0.415865
5	23915200	23915400	hypo-methylation	-0.312146
5	23915800	23916100	hypo-methylation	-0.298121
5	23974400	23974800	hypo-methylation	-0.326792
5	24006700	24007100	hypo-methylation	-0.374341
5	25002100	25002600	hypo-methylation	-0.343606
5	25016200	25016600	hypo-methylation	-0.306793
5	25153600	25153700	hyper-methylation	0.286589
5	25170200	25170700	hypo-methylation	-0.382111
5	25175700	25176300	hypo-methylation	-0.438564
5	25354800	25355100	hypo-methylation	-0.264875
5	25443700	25444200	hypo-methylation	-0.369049
5	25713000	25713600	hypo-methylation	-0.678212
5	25818800	25819100	hypo-methylation	-0.48671
5	26583500	26584000	hypo-methylation	-0.531505
5	26713800	26714000	hypo-methylation	-0.430842
5	26767800	26768100	hypo-methylation	-0.341421
5	26873000	26873500	hypo-methylation	-0.427422
5	27024000	27024200	hypo-methylation	-0.3364
5	27673300	27673900	hypo-methylation	-0.48657
5	27721200	27721700	hypo-methylation	-0.363706
5	27771600	27772300	hypo-methylation	-0.36344
5	28015400	28015600	hyper-methylation	0.311733
5	28218700	28219000	hypo-methylation	-0.286138
5	28219400	28219600	hypo-methylation	-0.256323
5	28643000	28643400	hypo-methylation	-0.310037
5	28643500	28643600	hypo-methylation	-0.371362
5	28764000	28764500	hypo-methylation	-0.334193
5	29486000	29486500	hypo-methylation	-0.342846
5	29568900	29569200	hypo-methylation	-0.401475
5	29569600	29570000	hypo-methylation	-0.502061
5	29576200	29576800	hypo-methylation	-0.414358
5	29578200	29578500	hypo-methylation	-0.319225
6	175200	175600	hypo-methylation	-0.466041
6	175700	175900	hypo-methylation	-0.446579
6	193100	193400	hypo-methylation	-0.370571
6	224900	225100	hypo-methylation	-0.279754
6	469200	469500	hypo-methylation	-0.397445
6	2239800	2239900	hypo-methylation	-0.399736
6	2240200	2240300	hypo-methylation	-0.467147
6	2339200	2339700	hypo-methylation	-0.467196
6	3073300	3073800	hypo-methylation	-0.362623
6	3279600	3280100	hypo-methylation	-0.360957
6	3584300	3584700	hypo-methylation	-0.27521
6	4185700	4185800	hypo-methylation	-0.295598
6	5368900	5369200	hypo-methylation	-0.357468
6	5777500	5778200	hypo-methylation	-0.522726
6	5976500	5976800	hypo-methylation	-0.338464
6	6057300	6057900	hypo-methylation	-0.407575
6	6145500	6146000	hypo-methylation	-0.466102
6	8338900	8339400	hypo-methylation	-0.398671
6	9023800	9024200	hyper-methylation	0.320088
6	9333000	9333100	hypo-methylation	-0.344413
6	11179200	11179400	hyper-methylation	0.253767
6	11190100	11190300	hypo-methylation	-0.290683
6	11218700	11219200	hypo-methylation	-0.488183
6	11290100	11290600	hypo-methylation	-0.315234
6	11291200	11291400	hypo-methylation	-0.279467
6	11481100	11481200	hypo-methylation	-0.37372
6	11619700	11619900	hypo-methylation	-0.313563
6	11642100	11642600	hypo-methylation	-0.497034
6	11673900	11674400	hypo-methylation	-0.500233
6	11733600	11733900	hyper-methylation	0.321675
6	11996700	11996900	hypo-methylation	-0.332475
6	12137300	12137800	hypo-methylation	-0.446519
6	12206800	12207100	hyper-methylation	0.295856
6	12317400	12317600	hypo-methylation	-0.267663
6	12351400	12352200	hypo-methylation	-0.475766
6	12432700	12433700	hypo-methylation	-0.378046
6	12775500	12776000	hypo-methylation	-0.353042
6	12840300	12840600	hypo-methylation	-0.315279
6	12926400	12926800	hypo-methylation	-0.414136
6	12927700	12928200	hypo-methylation	-0.326328
6	12928300	12928400	hypo-methylation	-0.3473
6	12993000	12993300	hypo-methylation	-0.319247
6	12993400	12993600	hypo-methylation	-0.338722
6	12993700	12993800	hypo-methylation	-0.326322
6	13065700	13066200	hypo-methylation	-0.33584
6	13066300	13066600	hypo-methylation	-0.301907
6	13067100	13067500	hypo-methylation	-0.311957
6	13118200	13118700	hypo-methylation	-0.390016
6	13122900	13123100	hypo-methylation	-0.322036
6	13199200	13199800	hypo-methylation	-0.435254
6	13199900	13200200	hypo-methylation	-0.349004
6	13215600	13215900	hypo-methylation	-0.425668
6	13319000	13319300	hypo-methylation	-0.451229
6	13339000	13339500	hypo-methylation	-0.571924
6	13340300	13340900	hypo-methylation	-0.29244
6	13396200	13396500	hypo-methylation	-0.311308
6	13419600	13420000	hypo-methylation	-0.557204
6	13434400	13434600	hypo-methylation	-0.352251
6	13442400	13442700	hypo-methylation	-0.63945
6	13486800	13487300	hypo-methylation	-0.354954
6	13487400	13487700	hypo-methylation	-0.363487
6	13489700	13490000	hypo-methylation	-0.413943
6	13528500	13528700	hypo-methylation	-0.257769
6	13587400	13587800	hypo-methylation	-0.463791
6	13644600	13645100	hypo-methylation	-0.365437
6	13699400	13699700	hypo-methylation	-0.241914
6	13814900	13815400	hypo-methylation	-0.294185
6	13817000	13817600	hypo-methylation	-0.417331
6	13912500	13912900	hypo-methylation	-0.445291
6	13913000	13913800	hypo-methylation	-0.436562
6	13951900	13952400	hypo-methylation	-0.423903
6	14158400	14158700	hyper-methylation	0.226108
6	14345800	14346300	hypo-methylation	-0.369175
6	14366600	14367100	hypo-methylation	-0.412535
6	14501200	14501400	hypo-methylation	-0.34761
6	14933100	14933400	hypo-methylation	-0.288475
6	14934900	14935300	hypo-methylation	-0.405476
6	14948700	14949000	hypo-methylation	-0.357827
6	14949100	14949200	hypo-methylation	-0.299619
6	15002400	15002500	hypo-methylation	-0.358704
6	15150000	15150600	hypo-methylation	-0.491848
6	15150000	15150600	hypo-methylation	-0.50371
6	15152400	15152800	hypo-methylation	-0.399127
6	15290200	15290400	hyper-methylation	0.280741
6	15385000	15385200	hypo-methylation	-0.374838
6	15501200	15501500	hypo-methylation	-0.329743
6	15604300	15604700	hypo-methylation	-0.26888
6	15700200	15700400	hypo-methylation	-0.337124
6	15749100	15749600	hypo-methylation	-0.360187
6	15750000	15751400	hypo-methylation	-0.399906
6	15767400	15768000	hypo-methylation	-0.515134
6	15776000	15776200	hypo-methylation	-0.378341
6	15882400	15882700	hypo-methylation	-0.345058
6	15995700	15995800	hypo-methylation	-0.296559
6	15996000	15996400	hypo-methylation	-0.327506
6	16034000	16034900	hypo-methylation	-0.419743
6	16052600	16053200	hypo-methylation	-0.301087
6	16054000	16054300	hypo-methylation	-0.288252
6	16055400	16055700	hypo-methylation	-0.288736
6	16200500	16201000	hypo-methylation	-0.306678
6	16260800	16261000	hyper-methylation	0.265175
6	16332500	16333400	hypo-methylation	-0.372949
6	16418500	16419100	hypo-methylation	-0.500464
6	16470200	16470600	hypo-methylation	-0.399213
6	16482200	16482500	hypo-methylation	-0.373323
6	16482600	16483100	hypo-methylation	-0.399823
6	16576700	16577200	hypo-methylation	-0.305075
6	16814000	16814400	hypo-methylation	-0.395264
6	16867100	16867400	hypo-methylation	-0.339271
6	16961200	16961300	hypo-methylation	-0.371573
6	17077100	17077200	hypo-methylation	-0.332564
6	17271700	17272300	hypo-methylation	-0.456263
6	17371200	17371500	hypo-methylation	-0.262068
6	17389800	17390000	hypo-methylation	-0.336448
6	17441300	17441400	hyper-methylation	0.25165
6	17465300	17465800	hypo-methylation	-0.324572
6	17470600	17471500	hypo-methylation	-0.412145
6	17547500	17547800	hypo-methylation	-0.307391
6	17549600	17550000	hypo-methylation	-0.311362
6	17802200	17802500	hypo-methylation	-0.410959
6	17802600	17802800	hypo-methylation	-0.470735
6	17829600	17830100	hypo-methylation	-0.308424
6	17971200	17971600	hypo-methylation	-0.411358
6	18139300	18139400	hypo-methylation	-0.396116
6	18139500	18139600	hypo-methylation	-0.423608
6	18967500	18968500	hypo-methylation	-0.451016
6	19191500	19191700	hypo-methylation	-0.31204
6	19314200	19314700	hypo-methylation	-0.437765
6	19323600	19323800	hypo-methylation	-0.417127
6	19399600	19400100	hypo-methylation	-0.482056
6	19590800	19591100	hypo-methylation	-0.358816
6	19609900	19610200	hypo-methylation	-0.316598
6	19916900	19917000	hypo-methylation	-0.39781
6	20043100	20043400	hypo-methylation	-0.472608
6	20043600	20044000	hypo-methylation	-0.370296
6	20054100	20054500	hypo-methylation	-0.332012
6	20055000	20055500	hypo-methylation	-0.301948
6	20057800	20058200	hypo-methylation	-0.38418
6	20140600	20140900	hypo-methylation	-0.332525
6	20149700	20150100	hypo-methylation	-0.379321
6	20150200	20150900	hypo-methylation	-0.390946
6	20166700	20166800	hypo-methylation	-0.540037
6	20168500	20168900	hypo-methylation	-0.490599
6	20234400	20234700	hypo-methylation	-0.401021
6	20384900	20385200	hypo-methylation	-0.256519
6	20461200	20461600	hypo-methylation	-0.280129
6	20788400	20788600	hyper-methylation	0.246953
6	21206400	21206800	hypo-methylation	-0.543625
6	21235900	21236200	hypo-methylation	-0.316893
6	21352100	21352600	hypo-methylation	-0.494067
6	22305200	22305600	hypo-methylation	-0.329168
6	22324900	22325000	hypo-methylation	-0.285571
6	22673500	22673700	hypo-methylation	-0.333338
6	23069400	23069900	hypo-methylation	-0.351728
6	23102400	23102900	hypo-methylation	-0.426917
6	23103000	23103600	hypo-methylation	-0.534271
6	23341500	23342400	hypo-methylation	-0.399373
6	23384500	23384800	hypo-methylation	-0.410804
6	23504600	23505200	hypo-methylation	-0.433852
6	23829200	23829500	hypo-methylation	-0.331655
6	23935200	23935600	hypo-methylation	-0.489975
6	24126500	24126600	hypo-methylation	-0.326462
6	24376600	24377000	hypo-methylation	-0.336475
6	24540000	24540300	hypo-methylation	-0.343643
6	24812200	24812700	hypo-methylation	-0.45604
6	24813000	24813400	hypo-methylation	-0.379184
6	24915300	24915800	hypo-methylation	-0.414467
6	25035700	25036200	hypo-methylation	-0.457952
6	25230200	25230500	hypo-methylation	-0.341075
6	25682400	25683100	hypo-methylation	-0.465745
6	25683500	25683900	hypo-methylation	-0.366287
6	25715000	25715300	hypo-methylation	-0.42695
6	25716900	25717100	hypo-methylation	-0.348962
6	25750700	25750800	hypo-methylation	-0.349442
6	25916000	25916300	hypo-methylation	-0.426293
6	26095900	26096400	hypo-methylation	-0.450176
6	26153300	26153700	hypo-methylation	-0.470559
6	26495500	26495700	hypo-methylation	-0.466768
6	26792900	26793300	hypo-methylation	-0.48636
6	26861100	26861300	hypo-methylation	-0.398613
6	27057500	27057700	hypo-methylation	-0.276781
6	27846800	27846900	hypo-methylation	-0.335502
6	28070600	28070900	hypo-methylation	-0.354108
6	28976700	28976900	hypo-methylation	-0.367965
6	29817500	29818000	hypo-methylation	-0.436183
6	29818600	29818700	hypo-methylation	-0.359837
6	30135800	30136100	hypo-methylation	-0.528347
6	30956900	30957500	hypo-methylation	-0.374945
6	31232700	31233200	hypo-methylation	-0.329455
7	266700	266800	hypo-methylation	-0.315644
7	267000	267200	hypo-methylation	-0.312311
7	3306900	3307400	hypo-methylation	-0.407724
7	3358200	3358400	hypo-methylation	-0.244316
7	3370600	3371100	hypo-methylation	-0.334935
7	3595300	3595400	hypo-methylation	-0.370366
7	4592700	4593100	hypo-methylation	-0.32232
7	4707500	4707900	hyper-methylation	0.402094
7	4713300	4713900	hypo-methylation	-0.49649
7	4715300	4715800	hypo-methylation	-0.4805
7	5184400	5185100	hypo-methylation	-0.378598
7	5429500	5429800	hypo-methylation	-0.436267
7	5786500	5786800	hypo-methylation	-0.293451
7	6028700	6029400	hypo-methylation	-0.421451
7	6030200	6030800	hypo-methylation	-0.445049
7	6775100	6775200	hypo-methylation	-0.442971
7	6775100	6775200	hypo-methylation	-0.489112
7	6808300	6809200	hypo-methylation	-0.477718
7	6836600	6837200	hypo-methylation	-0.442613
7	6887700	6888000	hypo-methylation	-0.282221
7	6888300	6888700	hypo-methylation	-0.3706
7	7210100	7210600	hypo-methylation	-0.61025
7	7559900	7560200	hyper-methylation	0.278709
7	7563500	7563800	hypo-methylation	-0.297538
7	7577300	7577500	hypo-methylation	-0.368488
7	7658100	7658300	hypo-methylation	-0.292315
7	7779300	7779600	hypo-methylation	-0.329912
7	7833700	7834000	hypo-methylation	-0.389867
7	8286600	8286900	hypo-methylation	-0.336444
7	8325400	8325700	hypo-methylation	-0.478935
7	8490600	8490900	hypo-methylation	-0.351344
7	8513300	8514300	hypo-methylation	-0.513559
7	8997400	8997900	hypo-methylation	-0.460431
7	8999400	8999700	hypo-methylation	-0.41065
7	9000000	9000700	hypo-methylation	-0.342346
7	9823800	9823900	hyper-methylation	0.266206
7	10094500	10095500	hypo-methylation	-0.461977
7	10095600	10095700	hypo-methylation	-0.461529
7	10095900	10096500	hypo-methylation	-0.500928
7	10096800	10096900	hypo-methylation	-0.436959
7	10097000	10097300	hypo-methylation	-0.407428
7	10215400	10215900	hypo-methylation	-0.459067
7	10253900	10254300	hypo-methylation	-0.591304
7	10269400	10269900	hypo-methylation	-0.374908
7	10272700	10273200	hypo-methylation	-0.345544
7	10280100	10280700	hypo-methylation	-0.432341
7	10289300	10289400	hypo-methylation	-0.538017
7	10555600	10555800	hyper-methylation	0.255858
7	11038000	11038300	hypo-methylation	-0.295839
7	11276200	11276500	hypo-methylation	-0.31773
7	11276600	11276800	hypo-methylation	-0.292355
7	11277300	11277800	hypo-methylation	-0.431609
7	11354700	11355200	hypo-methylation	-0.574964
7	11364800	11365100	hypo-methylation	-0.436362
7	11494500	11495100	hypo-methylation	-0.398639
7	11518900	11519200	hypo-methylation	-0.401991
7	11563900	11564400	hyper-methylation	0.398496
7	11565000	11565400	hyper-methylation	0.311362
7	11844900	11845600	hypo-methylation	-0.460338
7	12015400	12015500	hyper-methylation	0.240133
7	12364900	12365300	hypo-methylation	-0.279834
7	12368500	12368800	hypo-methylation	-0.251559
7	12423200	12423500	hypo-methylation	-0.418693
7	12699100	12699300	hypo-methylation	-0.346754
7	12735200	12735500	hypo-methylation	-0.320153
7	13043500	13043600	hypo-methylation	-0.274711
7	13146800	13147300	hypo-methylation	-0.297555
7	13398200	13398300	hypo-methylation	-0.359611
7	13441300	13441600	hypo-methylation	-0.521842
7	13503300	13503900	hypo-methylation	-0.443893
7	13511900	13512200	hypo-methylation	-0.343367
7	13747700	13748000	hypo-methylation	-0.289496
7	13748200	13748900	hypo-methylation	-0.357175
7	14515300	14515600	hypo-methylation	-0.412525
7	14515800	14516200	hypo-methylation	-0.36303
7	14560300	14560800	hypo-methylation	-0.335673
7	14772700	14773000	hypo-methylation	-0.339421
7	15243500	15243900	hypo-methylation	-0.329581
7	15244800	15245000	hypo-methylation	-0.279863
7	15628500	15629100	hypo-methylation	-0.477213
7	15749600	15750000	hypo-methylation	-0.36985
7	15794900	15795300	hypo-methylation	-0.377667
7	15874300	15874600	hypo-methylation	-0.48389
7	16312000	16312200	hyper-methylation	0.263504
7	16330900	16331200	hypo-methylation	-0.276275
7	16475600	16475700	hyper-methylation	0.273053
7	16500500	16500700	hypo-methylation	-0.369236
7	16659100	16659700	hypo-methylation	-0.396755
7	16795100	16795300	hypo-methylation	-0.33594
7	16806900	16807300	hypo-methylation	-0.287769
7	16813100	16813300	hypo-methylation	-0.272096
7	16853800	16854100	hyper-methylation	0.349534
7	16867400	16867900	hypo-methylation	-0.32931
7	16868000	16868500	hypo-methylation	-0.301772
7	16869600	16870100	hypo-methylation	-0.339017
7	16891100	16891700	hypo-methylation	-0.386004
7	16910800	16911000	hyper-methylation	0.285466
7	16947200	16947700	hypo-methylation	-0.442198
7	17121500	17122400	hypo-methylation	-0.348695
7	17185700	17185900	hypo-methylation	-0.331067
7	17394800	17394900	hyper-methylation	0.306933
7	17683200	17683300	hypo-methylation	-0.373846
7	18104800	18104900	hypo-methylation	-0.287714
7	18258500	18259000	hypo-methylation	-0.37253
7	18259500	18260000	hypo-methylation	-0.408986
7	18547400	18547600	hypo-methylation	-0.338165
7	18583800	18583900	hypo-methylation	-0.270205
7	18584400	18584500	hypo-methylation	-0.320313
7	18585900	18586600	hypo-methylation	-0.442141
7	18604200	18604500	hypo-methylation	-0.403149
7	18604600	18605100	hypo-methylation	-0.392107
7	18679900	18680400	hypo-methylation	-0.404478
7	19095200	19095700	hypo-methylation	-0.349862
7	19239600	19239900	hypo-methylation	-0.414756
7	19241100	19241600	hypo-methylation	-0.425322
7	19271100	19271800	hypo-methylation	-0.43533
7	19555000	19555400	hypo-methylation	-0.324856
7	19597800	19598200	hypo-methylation	-0.39501
7	19602000	19602300	hypo-methylation	-0.298308
7	19606100	19606600	hypo-methylation	-0.616004
7	19697700	19698100	hypo-methylation	-0.505825
7	19909900	19910500	hypo-methylation	-0.489424
7	19934700	19935100	hypo-methylation	-0.277232
7	20719000	20719300	hypo-methylation	-0.316129
7	20754400	20754600	hypo-methylation	-0.344484
7	20913400	20913600	hypo-methylation	-0.3049
7	20914000	20914200	hypo-methylation	-0.325478
7	20955100	20955300	hyper-methylation	0.274575
7	21229100	21229500	hypo-methylation	-0.412237
7	21243700	21243900	hyper-methylation	0.294525
7	21313400	21313800	hypo-methylation	-0.501173
7	21752800	21753300	hypo-methylation	-0.459892
7	21794500	21794600	hyper-methylation	0.32034
7	21836300	21836600	hyper-methylation	0.336425
7	21869300	21869500	hypo-methylation	-0.342546
7	21997700	21998500	hypo-methylation	-0.342573
7	22243200	22243300	hypo-methylation	-0.419953
7	22314400	22314900	hypo-methylation	-0.553138
7	22403500	22403800	hypo-methylation	-0.272562
7	22419000	22419500	hypo-methylation	-0.338309
7	22552200	22552600	hypo-methylation	-0.309073
7	22664900	22665200	hypo-methylation	-0.274741
7	22699100	22699700	hypo-methylation	-0.438508
7	22722200	22722900	hypo-methylation	-0.32692
7	22811500	22812200	hypo-methylation	-0.384185
7	23104900	23105600	hypo-methylation	-0.513586
7	23367900	23368000	hypo-methylation	-0.434775
7	23605400	23605500	hypo-methylation	-0.353605
7	23690200	23690500	hypo-methylation	-0.306091
7	23845600	23846100	hypo-methylation	-0.374462
7	23909900	23910300	hypo-methylation	-0.419556
7	23982200	23983400	hypo-methylation	-0.591217
7	24025900	24026100	hypo-methylation	-0.640409
7	24197300	24197600	hypo-methylation	-0.419446
7	24197800	24198300	hypo-methylation	-0.388701
7	24199800	24200600	hypo-methylation	-0.389497
7	24343000	24343600	hypo-methylation	-0.448344
7	24488900	24489200	hypo-methylation	-0.266129
7	24578800	24579200	hypo-methylation	-0.297545
7	24907300	24907600	hypo-methylation	-0.380719
7	25003000	25003700	hypo-methylation	-0.374271
7	25044600	25044900	hypo-methylation	-0.441584
7	25124000	25124500	hypo-methylation	-0.408332
7	25218000	25218400	hypo-methylation	-0.572385
7	25218700	25219200	hypo-methylation	-0.483262
7	25219500	25220000	hypo-methylation	-0.683875
7	25220200	25220700	hypo-methylation	-0.738325
7	25221700	25222200	hypo-methylation	-0.352558
7	25239100	25239600	hypo-methylation	-0.708843
7	25457400	25457700	hypo-methylation	-0.238342
7	25523700	25524200	hypo-methylation	-0.490547
7	25712400	25712700	hypo-methylation	-0.325389
7	25784600	25784900	hypo-methylation	-0.339313
7	25968200	25968700	hypo-methylation	-0.384803
7	26108500	26108700	hyper-methylation	0.276942
7	27848700	27848800	hypo-methylation	-0.448396
7	27913000	27913700	hypo-methylation	-0.386161
7	29246000	29246300	hypo-methylation	-0.318445
7	29488800	29489100	hypo-methylation	-0.544207
7	29494900	29495000	hypo-methylation	-0.3529
7	29668200	29668600	hypo-methylation	-0.502609
7	29670400	29671400	hypo-methylation	-0.574588
8	15700	15800	hypo-methylation	-0.335508
8	34300	34500	hypo-methylation	-0.306975
8	35000	35700	hypo-methylation	-0.483915
8	293200	293500	hypo-methylation	-0.343233
8	293700	293800	hypo-methylation	-0.48105
8	638500	639100	hypo-methylation	-0.588067
8	1659600	1659800	hypo-methylation	-0.347488
8	2130300	2130600	hypo-methylation	-0.304783
8	2286800	2287100	hypo-methylation	-0.362692
8	3657600	3657700	hypo-methylation	-0.293909
8	3688300	3688800	hypo-methylation	-0.520196
8	3891800	3891900	hypo-methylation	-0.319734
8	4332800	4333100	hypo-methylation	-0.334757
8	4378500	4379100	hypo-methylation	-0.446081
8	4382700	4383200	hypo-methylation	-0.385142
8	4502700	4502800	hypo-methylation	-0.341417
8	4541400	4541600	hypo-methylation	-0.344892
8	4542400	4542700	hypo-methylation	-0.467858
8	4542800	4542900	hypo-methylation	-0.378233
8	4598100	4599400	hypo-methylation	-0.447105
8	4944400	4944800	hypo-methylation	-0.36921
8	4944900	4945000	hypo-methylation	-0.34151
8	5117600	5117900	hypo-methylation	-0.3856
8	5415200	5415400	hypo-methylation	-0.29399
8	5720100	5720200	hypo-methylation	-0.241073
8	5855800	5856100	hypo-methylation	-0.354448
8	5860000	5860400	hypo-methylation	-0.419331
8	6568500	6568600	hyper-methylation	0.315841
8	7330900	7331400	hypo-methylation	-0.395624
8	7859300	7859600	hypo-methylation	-0.594512
8	8014500	8015200	hypo-methylation	-0.558796
8	8531700	8532100	hypo-methylation	-0.439564
8	8532700	8533100	hypo-methylation	-0.295087
8	8727500	8727700	hyper-methylation	0.330888
8	8946800	8947000	hypo-methylation	-0.399437
8	8947100	8947600	hypo-methylation	-0.413498
8	9076900	9077200	hypo-methylation	-0.383553
8	9079700	9080000	hypo-methylation	-0.406088
8	9080500	9080600	hypo-methylation	-0.393022
8	9375500	9375700	hypo-methylation	-0.31779
8	9376600	9376900	hypo-methylation	-0.288333
8	10090000	10090400	hypo-methylation	-0.38296
8	10096200	10096700	hypo-methylation	-0.531268
8	10150300	10150800	hypo-methylation	-0.549383
8	10252600	10252900	hypo-methylation	-0.505397
8	10253100	10253400	hypo-methylation	-0.486888
8	10254100	10254600	hypo-methylation	-0.373779
8	10254800	10255100	hypo-methylation	-0.33028
8	10359900	10360000	hyper-methylation	0.296463
8	10415300	10415400	hypo-methylation	-0.345996
8	10441000	10441100	hypo-methylation	-0.421881
8	10495800	10497300	hypo-methylation	-0.390238
8	10497500	10497800	hypo-methylation	-0.420138
8	10627300	10627700	hypo-methylation	-0.342797
8	10741700	10741800	hypo-methylation	-0.29186
8	10743500	10744000	hypo-methylation	-0.349156
8	10746400	10746600	hyper-methylation	0.281922
8	10746700	10747000	hyper-methylation	0.311279
8	10749000	10749200	hyper-methylation	0.270888
8	10786900	10787300	hypo-methylation	-0.314545
8	10913200	10913600	hyper-methylation	0.295485
8	10956300	10956400	hypo-methylation	-0.272016
8	11279400	11280000	hypo-methylation	-0.57646
8	11421700	11422200	hypo-methylation	-0.44084
8	11425000	11425500	hypo-methylation	-0.404077
8	11427300	11427700	hypo-methylation	-0.305685
8	11428500	11428800	hypo-methylation	-0.294862
8	11433000	11433300	hyper-methylation	0.253659
8	11484600	11485000	hypo-methylation	-0.325355
8	11556900	11557300	hypo-methylation	-0.410725
8	11557500	11557900	hypo-methylation	-0.4622
8	11792100	11792400	hypo-methylation	-0.269375
8	12307200	12307400	hypo-methylation	-0.39305
8	12326700	12327200	hypo-methylation	-0.380501
8	12802800	12803000	hyper-methylation	0.276207
8	12839700	12840300	hypo-methylation	-0.31923
8	12882900	12883200	hypo-methylation	-0.365819
8	13025500	13025600	hypo-methylation	-0.34
8	13025700	13026000	hypo-methylation	-0.3934
8	13358000	13358800	hypo-methylation	-0.429987
8	13508200	13508800	hyper-methylation	0.376683
8	13520500	13520700	hyper-methylation	0.276334
8	13852700	13852900	hypo-methylation	-0.28791
8	13911700	13912100	hypo-methylation	-0.408468
8	13928800	13929300	hypo-methylation	-0.281053
8	13990500	13990800	hypo-methylation	-0.316415
8	14046800	14047300	hypo-methylation	-0.53991
8	14162500	14162900	hypo-methylation	-0.373363
8	14283200	14283600	hypo-methylation	-0.414506
8	15068900	15069000	hypo-methylation	-0.370823
8	15075000	15075600	hypo-methylation	-0.459858
8	15086800	15087100	hypo-methylation	-0.499225
8	15110800	15111200	hypo-methylation	-0.376301
8	15390300	15390600	hypo-methylation	-0.355612
8	15676300	15676500	hypo-methylation	-0.307496
8	16452500	16452800	hypo-methylation	-0.26079
8	16490100	16490400	hypo-methylation	-0.291922
8	16987700	16988200	hypo-methylation	-0.467214
8	16992300	16992400	hypo-methylation	-0.330708
8	17072900	17073200	hypo-methylation	-0.290221
8	17534400	17534700	hypo-methylation	-0.307233
8	17678600	17678700	hypo-methylation	-0.33295
8	17839300	17839700	hypo-methylation	-0.402211
8	17998200	17998600	hypo-methylation	-0.355245
8	18175000	18175300	hypo-methylation	-0.331484
8	18214400	18214900	hypo-methylation	-0.292691
8	18756300	18756800	hypo-methylation	-0.346761
8	18764700	18764800	hypo-methylation	-0.432725
8	19139100	19139500	hypo-methylation	-0.551044
8	19218400	19218900	hypo-methylation	-0.460737
8	19280400	19280700	hypo-methylation	-0.34538
8	19330200	19330500	hypo-methylation	-0.312717
8	19463200	19463600	hypo-methylation	-0.37895
8	19669900	19670200	hypo-methylation	-0.345913
8	19680100	19680600	hypo-methylation	-0.519035
8	20024500	20025000	hypo-methylation	-0.401465
8	20406700	20406900	hypo-methylation	-0.373254
8	20413300	20413700	hypo-methylation	-0.431898
8	20426200	20426400	hypo-methylation	-0.411371
8	20570700	20570800	hypo-methylation	-0.43624
8	20796300	20796800	hypo-methylation	-0.346879
8	20900200	20900300	hypo-methylation	-0.350459
8	21069500	21069700	hypo-methylation	-0.30395
8	21075500	21076000	hypo-methylation	-0.359577
8	21141800	21141900	hyper-methylation	0.303465
8	21179900	21180100	hypo-methylation	-0.318534
8	21405400	21406300	hypo-methylation	-0.386032
8	21417900	21418400	hypo-methylation	-0.330356
8	21425500	21425900	hypo-methylation	-0.39578
8	21465200	21465500	hypo-methylation	-0.392809
8	21596800	21598100	hypo-methylation	-0.288912
8	21753800	21753900	hypo-methylation	-0.277137
8	21975300	21975400	hypo-methylation	-0.260093
8	22109900	22110200	hypo-methylation	-0.325416
8	22174800	22175100	hypo-methylation	-0.405175
8	22189300	22189500	hypo-methylation	-0.2434
8	22294000	22294300	hypo-methylation	-0.255675
8	22499000	22499600	hypo-methylation	-0.39015
8	22544700	22545000	hypo-methylation	-0.299833
8	22545900	22547100	hypo-methylation	-0.451366
8	22608200	22608900	hypo-methylation	-0.32242
8	22628000	22628400	hypo-methylation	-0.495625
8	22638900	22639400	hypo-methylation	-0.442323
8	22644400	22644700	hypo-methylation	-0.2428
8	22653400	22653500	hypo-methylation	-0.344484
8	22653800	22654100	hypo-methylation	-0.340497
8	22718200	22718400	hypo-methylation	-0.32081
8	22719700	22720000	hypo-methylation	-0.487525
8	22832000	22832300	hypo-methylation	-0.315378
8	22963900	22964200	hypo-methylation	-0.377995
8	23059700	23060200	hypo-methylation	-0.420198
8	23115300	23115800	hypo-methylation	-0.450632
8	23256800	23257400	hypo-methylation	-0.454539
8	23297500	23297900	hypo-methylation	-0.448656
8	23333300	23333600	hypo-methylation	-0.307538
8	23473000	23473300	hypo-methylation	-0.568547
8	23479600	23480000	hypo-methylation	-0.305725
8	23480500	23481100	hypo-methylation	-0.305551
8	23481200	23481700	hypo-methylation	-0.333456
8	23482300	23482600	hypo-methylation	-0.323979
8	23482800	23483000	hypo-methylation	-0.324273
8	23483500	23483800	hypo-methylation	-0.32407
8	23483900	23484200	hypo-methylation	-0.350591
8	23606100	23606400	hypo-methylation	-0.316366
8	25425700	25426200	hypo-methylation	-0.3486
8	25637000	25637300	hyper-methylation	0.340724
8	25637400	25637500	hyper-methylation	0.352686
8	27040100	27040500	hypo-methylation	-0.393879
8	27575300	27575600	hypo-methylation	-0.394315
8	27744600	27744800	hypo-methylation	-0.372175
8	27806800	27807100	hypo-methylation	-0.374785
8	27807800	27808000	hypo-methylation	-0.374982
8	27808400	27808700	hypo-methylation	-0.344218
8	27809000	27810000	hypo-methylation	-0.392224
8	27810100	27810500	hypo-methylation	-0.420255
8	27936600	27936800	hypo-methylation	-0.407479
8	27950100	27950600	hypo-methylation	-0.354177
8	27951500	27951900	hypo-methylation	-0.305764
8	28260300	28260700	hypo-methylation	-0.362364
8	28261000	28261500	hypo-methylation	-0.328309
8	28261700	28262000	hypo-methylation	-0.34187
8	28285200	28285800	hypo-methylation	-0.448102
8	28309800	28310200	hypo-methylation	-0.353043
8	28310700	28311200	hypo-methylation	-0.528943
9	846600	847000	hypo-methylation	-0.333214
9	919400	919600	hypo-methylation	-0.329218
9	949200	949500	hypo-methylation	-0.276936
9	977300	977600	hypo-methylation	-0.325916
9	1001400	1002500	hypo-methylation	-0.353827
9	1050300	1050600	hypo-methylation	-0.302821
9	1051600	1051900	hypo-methylation	-0.304448
9	1075700	1075800	hypo-methylation	-0.418067
9	1201100	1201600	hyper-methylation	0.383197
9	1202000	1202200	hyper-methylation	0.374406
9	1202300	1204200	hyper-methylation	0.418651
9	1206000	1206600	hyper-methylation	0.405628
9	1207800	1208300	hyper-methylation	0.419416
9	1241600	1242400	hypo-methylation	-0.36562
9	1260600	1261600	hypo-methylation	-0.390092
9	1274800	1275600	hypo-methylation	-0.437358
9	1322900	1323100	hypo-methylation	-0.346967
9	1360000	1360500	hypo-methylation	-0.388993
9	1360600	1360700	hypo-methylation	-0.323725
9	1373500	1373600	hyper-methylation	0.252213
9	1462200	1462500	hypo-methylation	-0.415805
9	1470800	1471100	hypo-methylation	-0.324167
9	1803000	1803100	hypo-methylation	-0.306129
9	1811600	1811900	hypo-methylation	-0.39461
9	1910300	1910700	hypo-methylation	-0.354437
9	1926600	1926700	hypo-methylation	-0.280316
9	2000900	2001000	hyper-methylation	0.276879
9	2068700	2069000	hypo-methylation	-0.407153
9	2070400	2070700	hypo-methylation	-0.295162
9	2191100	2191700	hypo-methylation	-0.342542
9	2362700	2363400	hypo-methylation	-0.443383
9	2500300	2500900	hypo-methylation	-0.363458
9	2590300	2590600	hypo-methylation	-0.252891
9	2989600	2990000	hypo-methylation	-0.37532
9	3054800	3055200	hypo-methylation	-0.47395
9	3066800	3067300	hypo-methylation	-0.323862
9	3070800	3071000	hypo-methylation	-0.287146
9	3202400	3202700	hypo-methylation	-0.393948
9	3306600	3306900	hypo-methylation	-0.314168
9	3380500	3380700	hypo-methylation	-0.27421
9	3399600	3400000	hypo-methylation	-0.302542
9	3474900	3475200	hypo-methylation	-0.336512
9	3499500	3499900	hypo-methylation	-0.333518
9	3530500	3530900	hypo-methylation	-0.274502
9	3731600	3731900	hypo-methylation	-0.326159
9	3896100	3896300	hypo-methylation	-0.361694
9	3948800	3949100	hypo-methylation	-0.330809
9	4053800	4053900	hypo-methylation	-0.332925
9	4167100	4167600	hypo-methylation	-0.41615
9	4218000	4218200	hypo-methylation	-0.436896
9	4289400	4289800	hypo-methylation	-0.352698
9	4290000	4290100	hypo-methylation	-0.365893
9	4290600	4291100	hypo-methylation	-0.474294
9	4291400	4291900	hypo-methylation	-0.407672
9	4292000	4292100	hypo-methylation	-0.38971
9	4292500	4292600	hypo-methylation	-0.287884
9	4298300	4298500	hyper-methylation	0.401309
9	4346200	4346500	hypo-methylation	-0.336358
9	4482200	4482500	hypo-methylation	-0.335734
9	4576600	4577200	hypo-methylation	-0.464202
9	5003900	5004500	hypo-methylation	-0.427344
9	5310300	5310400	hypo-methylation	-0.330496
9	5453100	5453500	hyper-methylation	0.273371
9	5947800	5948200	hypo-methylation	-0.256545
9	6030100	6030400	hypo-methylation	-0.382452
9	6179100	6179500	hypo-methylation	-0.278469
9	6219800	6220400	hypo-methylation	-0.300907
9	6220800	6221100	hypo-methylation	-0.277637
9	6221700	6221900	hypo-methylation	-0.307038
9	7081700	7081900	hypo-methylation	-0.349852
9	7082000	7082200	hypo-methylation	-0.351065
9	9202900	9203400	hypo-methylation	-0.320615
9	9203500	9203600	hypo-methylation	-0.328394
9	9275400	9275500	hyper-methylation	0.317304
9	9322800	9323100	hypo-methylation	-0.402402
9	9749600	9750100	hypo-methylation	-0.41989
9	10343500	10343700	hypo-methylation	-0.33219
9	10831500	10831700	hypo-methylation	-0.303811
9	10831800	10832500	hypo-methylation	-0.302581
9	10921200	10921600	hypo-methylation	-0.428532
9	11248000	11248300	hypo-methylation	-0.404284
9	12176000	12176300	hypo-methylation	-0.352816
9	12181000	12181600	hypo-methylation	-0.369383
9	12182800	12183000	hypo-methylation	-0.379983
9	12406900	12407100	hypo-methylation	-0.31215
9	12527600	12528000	hypo-methylation	-0.439009
9	12912800	12913100	hypo-methylation	-0.294694
9	12983000	12983300	hypo-methylation	-0.379119
9	13642000	13642200	hypo-methylation	-0.332668
9	14120500	14120900	hypo-methylation	-0.295864
9	14404100	14404300	hypo-methylation	-0.291488
9	14662600	14662800	hypo-methylation	-0.268325
9	14668700	14669000	hypo-methylation	-0.362622
9	14853200	14853400	hypo-methylation	-0.394462
9	14926900	14927800	hypo-methylation	-0.403446
9	14964100	14964300	hypo-methylation	-0.26645
9	14969400	14969500	hypo-methylation	-0.3178
9	14969600	14969700	hypo-methylation	-0.310233
9	15426900	15427100	hypo-methylation	-0.312445
9	15993800	15994100	hyper-methylation	0.293625
9	16258600	16258800	hypo-methylation	-0.460264
9	16416300	16416500	hypo-methylation	-0.29359
9	16448400	16448700	hypo-methylation	-0.28045
9	16745900	16746200	hypo-methylation	-0.38982
9	16780200	16780700	hypo-methylation	-0.467796
9	16997100	16997500	hypo-methylation	-0.315512
9	17097400	17097800	hypo-methylation	-0.367142
9	17218900	17219100	hypo-methylation	-0.294133
9	17336600	17336900	hypo-methylation	-0.33068
9	17337100	17337200	hypo-methylation	-0.310755
9	17464500	17464800	hyper-methylation	0.29052
9	17552300	17552500	hyper-methylation	0.298425
9	17655200	17655900	hypo-methylation	-0.38209
9	17657400	17658000	hypo-methylation	-0.452987
9	17658300	17658900	hypo-methylation	-0.361786
9	17839800	17840100	hypo-methylation	-0.418241
9	17986300	17986700	hypo-methylation	-0.298801
9	17987500	17987700	hypo-methylation	-0.433581
9	18426300	18426500	hypo-methylation	-0.36305
9	19156000	19157000	hypo-methylation	-0.408214
9	19305600	19306400	hypo-methylation	-0.333308
9	19452000	19452500	hypo-methylation	-0.44353
9	19453200	19453300	hypo-methylation	-0.408909
9	19453400	19453900	hypo-methylation	-0.440894
9	19537700	19538100	hypo-methylation	-0.268379
9	19569200	19569600	hypo-methylation	-0.298712
9	19820500	19821000	hypo-methylation	-0.628969
9	20106500	20107000	hypo-methylation	-0.316643
9	20325500	20325900	hypo-methylation	-0.277093
9	20366500	20367000	hypo-methylation	-0.414528
9	20397000	20397500	hypo-methylation	-0.322979
9	20941500	20942100	hypo-methylation	-0.488553
9	21042500	21043500	hypo-methylation	-0.457947
9	21327900	21328400	hypo-methylation	-0.447811
9	21468400	21468900	hypo-methylation	-0.609114
9	22120200	22121200	hypo-methylation	-0.583514
9	22681700	22682100	hypo-methylation	-0.430073
9	22809000	22809100	hypo-methylation	-0.328892
10	66300	66600	hypo-methylation	-0.293496
10	309600	309800	hypo-methylation	-0.31434
10	310800	311100	hypo-methylation	-0.290432
10	416900	417000	hypo-methylation	-0.434613
10	495700	495800	hyper-methylation	0.359646
10	516400	516800	hypo-methylation	-0.295717
10	585500	585800	hypo-methylation	-0.258883
10	795200	795300	hyper-methylation	0.267746
10	1013300	1013700	hypo-methylation	-0.362895
10	1528100	1528300	hypo-methylation	-0.287883
10	1740600	1741000	hypo-methylation	-0.403689
10	1778300	1778600	hypo-methylation	-0.359913
10	1864200	1864700	hypo-methylation	-0.503602
10	2191000	2191200	hypo-methylation	-0.581566
10	2448900	2449500	hyper-methylation	0.314222
10	2734500	2735000	hypo-methylation	-0.263524
10	2964900	2965200	hypo-methylation	-0.347642
10	3045600	3045800	hyper-methylation	0.285748
10	3442000	3442300	hypo-methylation	-0.357529
10	4031900	4032500	hypo-methylation	-0.416023
10	4513700	4514200	hypo-methylation	-0.342577
10	4736800	4737200	hypo-methylation	-0.538243
10	5339000	5339200	hypo-methylation	-0.330115
10	5768500	5769000	hypo-methylation	-0.302262
10	6028300	6028700	hypo-methylation	-0.36052
10	6157800	6158200	hypo-methylation	-0.308885
10	6254900	6255400	hypo-methylation	-0.395749
10	6262400	6262500	hypo-methylation	-0.33801
10	6262600	6263000	hypo-methylation	-0.340985
10	6292800	6293100	hypo-methylation	-0.347696
10	6862100	6862400	hypo-methylation	-0.390675
10	6863600	6864100	hypo-methylation	-0.332483
10	6943300	6943500	hypo-methylation	-0.318897
10	6945500	6946100	hypo-methylation	-0.391462
10	7117800	7117900	hypo-methylation	-0.2655
10	7292700	7292800	hyper-methylation	0.257079
10	7409700	7410200	hypo-methylation	-0.412294
10	7484900	7485400	hyper-methylation	0.275958
10	7536600	7537100	hypo-methylation	-0.427975
10	7538000	7538200	hypo-methylation	-0.450025
10	7635400	7635900	hypo-methylation	-0.410894
10	7683800	7684600	hypo-methylation	-0.436253
10	7985400	7986100	hypo-methylation	-0.396574
10	7986300	7986800	hypo-methylation	-0.404682
10	8377200	8377500	hypo-methylation	-0.295664
10	8464900	8465100	hypo-methylation	-0.256596
10	8468900	8469100	hypo-methylation	-0.435883
10	8503100	8503500	hypo-methylation	-0.414945
10	8525800	8526300	hypo-methylation	-0.29048
10	8594600	8594900	hypo-methylation	-0.397158
10	8798600	8798800	hypo-methylation	-0.329234
10	8934800	8935400	hypo-methylation	-0.385447
10	8966100	8966300	hypo-methylation	-0.33214
10	8966700	8966900	hypo-methylation	-0.293998
10	8977700	8977800	hyper-methylation	0.324779
10	8978000	8978100	hyper-methylation	0.293979
10	8989500	8989600	hypo-methylation	-0.304953
10	9057100	9057400	hypo-methylation	-0.245883
10	9060000	9061100	hypo-methylation	-0.494436
10	9061500	9061700	hypo-methylation	-0.390997
10	9081900	9082700	hypo-methylation	-0.561655
10	9151900	9152700	hypo-methylation	-0.354862
10	9153600	9154000	hypo-methylation	-0.353362
10	9154500	9155100	hypo-methylation	-0.367093
10	9233300	9233600	hypo-methylation	-0.275381
10	9263100	9263600	hypo-methylation	-0.347492
10	9344700	9345100	hypo-methylation	-0.268471
10	9360000	9360500	hypo-methylation	-0.355491
10	9398100	9398300	hyper-methylation	0.302254
10	9624300	9624400	hypo-methylation	-0.289358
10	9750900	9751600	hypo-methylation	-0.367916
10	9940100	9940300	hyper-methylation	0.29155
10	9979900	9980000	hypo-methylation	-0.330114
10	9980300	9980700	hypo-methylation	-0.308652
10	10185300	10185500	hypo-methylation	-0.30055
10	10279600	10279700	hyper-methylation	0.25125
10	10318500	10318900	hypo-methylation	-0.417913
10	10343700	10344000	hypo-methylation	-0.379756
10	10356400	10356800	hypo-methylation	-0.3952
10	10376900	10377300	hypo-methylation	-0.302603
10	10377500	10377900	hypo-methylation	-0.28317
10	10378300	10378600	hypo-methylation	-0.423416
10	10379800	10379900	hypo-methylation	-0.343934
10	10380000	10380300	hypo-methylation	-0.2992
10	10948400	10949400	hypo-methylation	-0.371927
10	10998100	10998400	hypo-methylation	-0.360568
10	11083800	11084000	hypo-methylation	-0.350521
10	11209900	11210200	hypo-methylation	-0.347758
10	11213500	11213600	hypo-methylation	-0.259184
10	11249900	11250300	hypo-methylation	-0.333367
10	11586300	11586700	hypo-methylation	-0.467523
10	11873200	11873700	hypo-methylation	-0.377258
10	11977100	11977500	hypo-methylation	-0.328188
10	12415500	12415600	hyper-methylation	0.243943
10	12766700	12766800	hypo-methylation	-0.315707
10	12985300	12985600	hyper-methylation	0.265459
10	13115700	13116300	hypo-methylation	-0.409832
10	13116500	13116600	hypo-methylation	-0.394154
10	13158600	13159000	hypo-methylation	-0.321956
10	13272300	13272500	hypo-methylation	-0.453021
10	13707200	13707300	hypo-methylation	-0.391154
10	13792600	13793000	hypo-methylation	-0.421594
10	13831300	13831800	hypo-methylation	-0.355764
10	14439600	14439800	hyper-methylation	0.296659
10	14511300	14511800	hypo-methylation	-0.397523
10	14772800	14772900	hyper-methylation	0.268731
10	14827500	14827800	hypo-methylation	-0.325345
10	14989000	14989200	hypo-methylation	-0.300555
10	15192100	15192400	hypo-methylation	-0.374588
10	15331400	15331800	hypo-methylation	-0.498452
10	15571000	15571400	hypo-methylation	-0.490265
10	15578700	15579100	hypo-methylation	-0.366485
10	15653900	15654300	hypo-methylation	-0.427275
10	15654800	15655300	hypo-methylation	-0.374024
10	15804300	15804600	hypo-methylation	-0.56718
10	16132400	16132600	hypo-methylation	-0.275992
10	16138600	16138700	hypo-methylation	-0.505062
10	16142900	16143500	hypo-methylation	-0.757672
10	16144000	16144800	hypo-methylation	-0.736485
10	16145100	16145500	hypo-methylation	-0.6502
10	16145700	16146200	hypo-methylation	-0.555408
10	16146700	16147400	hypo-methylation	-0.551346
10	16172800	16173200	hypo-methylation	-0.290681
10	16494200	16494400	hypo-methylation	-0.384107
10	16531200	16531500	hypo-methylation	-0.347645
10	16673900	16674100	hypo-methylation	-0.367025
10	16864800	16865200	hyper-methylation	0.263533
10	17147300	17147700	hypo-methylation	-0.30855
10	17403900	17404400	hypo-methylation	-0.350399
10	17738400	17738600	hypo-methylation	-0.251175
10	17754000	17754400	hypo-methylation	-0.314428
10	17754700	17755100	hypo-methylation	-0.315747
10	17964700	17965200	hypo-methylation	-0.312486
10	18109400	18109700	hypo-methylation	-0.343302
10	18470400	18470700	hypo-methylation	-0.371028
10	18830500	18830900	hyper-methylation	0.335616
10	19370000	19370400	hypo-methylation	-0.334033
10	19373500	19373700	hypo-methylation	-0.26795
10	19674800	19674900	hypo-methylation	-0.355786
10	20097200	20097900	hypo-methylation	-0.361533
10	20153300	20153900	hypo-methylation	-0.396062
10	20225300	20225800	hypo-methylation	-0.365013
10	20226100	20226200	hypo-methylation	-0.415191
10	21135400	21135600	hypo-methylation	-0.27697
10	21532700	21533000	hypo-methylation	-0.457573
10	21533500	21534200	hypo-methylation	-0.525383
10	22795300	22795600	hypo-methylation	-0.335769
10	22852600	22853000	hypo-methylation	-0.299621
10	22948300	22948700	hypo-methylation	-0.431179
10	23109300	23109900	hypo-methylation	-0.34074
10	23154200	23154600	hypo-methylation	-0.404838
10	23154900	23155200	hypo-methylation	-0.420893
10	23155900	23156100	hypo-methylation	-0.314017
11	987000	987300	hyper-methylation	0.249634
11	1025000	1025500	hypo-methylation	-0.442941
11	1037800	1038300	hypo-methylation	-0.335096
11	1040500	1041400	hypo-methylation	-0.353062
11	1043200	1043600	hypo-methylation	-0.364741
11	1043800	1044300	hypo-methylation	-0.367202
11	1334500	1334800	hypo-methylation	-0.297763
11	1470400	1471000	hypo-methylation	-0.398641
11	1477900	1478400	hypo-methylation	-0.391323
11	1482400	1482600	hypo-methylation	-0.381506
11	1688500	1688900	hypo-methylation	-0.306717
11	1714000	1714300	hypo-methylation	-0.350587
11	1857600	1858100	hypo-methylation	-0.318396
11	2018400	2018700	hypo-methylation	-0.313625
11	2152600	2153100	hypo-methylation	-0.439037
11	2209800	2210000	hypo-methylation	-0.521319
11	2262500	2262900	hypo-methylation	-0.538925
11	2263100	2263600	hypo-methylation	-0.611804
11	2461200	2461600	hypo-methylation	-0.318258
11	2496800	2497200	hypo-methylation	-0.339569
11	2523300	2523800	hypo-methylation	-0.382714
11	2959500	2960000	hypo-methylation	-0.429249
11	3263100	3263500	hyper-methylation	0.287247
11	3274800	3275000	hypo-methylation	-0.376243
11	4019500	4020100	hypo-methylation	-0.34093
11	4581600	4581700	hyper-methylation	0.249325
11	4684000	4684500	hypo-methylation	-0.420381
11	5569200	5569600	hypo-methylation	-0.305492
11	5684700	5684900	hypo-methylation	-0.324421
11	5685400	5685800	hypo-methylation	-0.449029
11	6158000	6158300	hypo-methylation	-0.302063
11	6345000	6345200	hypo-methylation	-0.262605
11	6475000	6475500	hypo-methylation	-0.309038
11	8575500	8576000	hypo-methylation	-0.372153
11	8580000	8580800	hypo-methylation	-0.357626
11	8581400	8581500	hyper-methylation	0.235771
11	9010900	9011600	hypo-methylation	-0.47558
11	10067400	10067900	hypo-methylation	-0.403467
11	10082600	10083100	hypo-methylation	-0.318945
11	10083400	10083700	hypo-methylation	-0.329208
11	10093900	10094400	hypo-methylation	-0.343775
11	10337300	10337700	hypo-methylation	-0.299806
[truncated: 224 more rows]

## Sheet: CHH DMRs in Nip-Kas
Supplementary Data 5. List of differential methylated regions between parental alleles in F1 endosperm.
chromosome	start	end	Comparison between parental allele
			Maternal - Paternal allele	difference of methylation levels
1	5585800	5587200	hyper-methylation	0.174966
1	5587300	5587500	hyper-methylation	0.190914
1	5587600	5588600	hyper-methylation	0.191587
1	5601400	5601500	hyper-methylation	0.116338
1	5601800	5602000	hyper-methylation	0.118125
1	5605900	5606500	hyper-methylation	0.225724
1	7173200	7173600	hyper-methylation	0.15189
1	8600600	8600700	hyper-methylation	0.130928
1	22377600	22377800	hyper-methylation	0.12585
1	26930200	26930600	hyper-methylation	0.204372
2	918100	918400	hyper-methylation	0.188873
2	9900600	9900900	hyper-methylation	0.146516
2	18353400	18353700	hyper-methylation	0.165921
2	27251400	27252100	hyper-methylation	0.197557
2	27253000	27253300	hyper-methylation	0.157625
2	29870000	29870300	hyper-methylation	0.215467
3	20591600	20592000	hyper-methylation	0.326267
3	32612800	32613200	hyper-methylation	0.158745
4	1750600	1751300	hyper-methylation	0.222487
4	20432000	20432200	hyper-methylation	0.144375
4	25130700	25131100	hyper-methylation	0.169335
5	7115800	7116000	hyper-methylation	0.127233
5	13580900	13581400	hyper-methylation	0.158828
5	16685100	16685600	hyper-methylation	0.1633
5	19073700	19073900	hyper-methylation	0.142738
5	19707900	19708100	hyper-methylation	0.15345
5	20310800	20311400	hyper-methylation	0.221743
5	28639100	28639500	hyper-methylation	0.150459
6	8339300	8339700	hyper-methylation	0.190707
6	12527100	12527200	hyper-methylation	0.149263
6	15650900	15651200	hyper-methylation	0.163733
7	8054300	8054600	hyper-methylation	0.118181
7	27877400	27877800	hyper-methylation	0.178396
8	4201800	4202000	hyper-methylation	0.149402
8	4202400	4203000	hyper-methylation	0.165939
8	4380300	4380700	hyper-methylation	0.150708
8	8504900	8505100	hyper-methylation	0.165729
8	16997900	16998400	hyper-methylation	0.155825
8	19283800	19283900	hyper-methylation	0.137883
8	27437400	27438000	hyper-methylation	0.253056
8	27951000	27951500	hyper-methylation	0.167358
9	19228600	19230500	hyper-methylation	0.211538
9	19305100	19306100	hyper-methylation	0.15102
9	19306400	19307700	hyper-methylation	0.158045
9	20549100	20549300	hyper-methylation	0.310812
9	22071200	22071500	hyper-methylation	0.152768
10	14689900	14690100	hyper-methylation	0.19235
10	20153900	20154200	hyper-methylation	0.157733
11	10886300	10886500	hyper-methylation	0.199713
12	10183100	10183300	hyper-methylation	0.152008
12	13174000	13174100	hyper-methylation	0.176625

## Sheet: CG DMRs in Nip-9311
Supplementary Data 5. List of differential methylated regions between parental alleles in F1 endosperm.
chromosome	start	end	Comparison between parental allele
			Maternal - Paternal allele	difference of methylation levels
1	35000	35500	hypo-methylation	-0.308758
1	38200	38600	hypo-methylation	-0.954333
1	185700	186200	hypo-methylation	-0.578542
1	196400	196700	hypo-methylation	-0.71414
1	197100	197600	hypo-methylation	-0.905611
1	207300	207800	hypo-methylation	-0.975375
1	213000	213700	hypo-methylation	-0.618419
1	219300	220000	hypo-methylation	-0.353257
1	221700	222300	hypo-methylation	-0.696717
1	225800	226000	hypo-methylation	-0.575913
1	230100	230400	hypo-methylation	-0.274514
1	239600	240100	hypo-methylation	-0.685779
1	248100	248400	hypo-methylation	-0.504238
1	252300	252800	hypo-methylation	-0.628802
1	254300	254600	hypo-methylation	-0.905933
1	255300	255900	hypo-methylation	-0.841828
1	262100	262400	hypo-methylation	-0.518975
1	264400	264800	hypo-methylation	-0.859529
1	290300	290500	hypo-methylation	-0.676477
1	290600	290900	hypo-methylation	-0.695867
1	291200	291700	hypo-methylation	-0.883458
1	295600	295800	hypo-methylation	-0.258325
1	307100	308000	hypo-methylation	-0.674164
1	314400	314700	hypo-methylation	-0.502342
1	315600	316000	hypo-methylation	-0.782062
1	325700	327300	hypo-methylation	-0.726718
1	325700	327300	hypo-methylation	-0.779365
1	335000	335500	hypo-methylation	-0.710935
1	336600	337300	hypo-methylation	-0.490407
1	339400	339700	hypo-methylation	-0.561696
1	340300	340700	hypo-methylation	-0.639262
1	387000	388100	hypo-methylation	-0.862925
1	390800	391100	hypo-methylation	-0.554512
1	391300	391800	hypo-methylation	-0.532252
1	392800	393100	hypo-methylation	-0.794565
1	414400	414900	hypo-methylation	-0.620013
1	415100	415500	hypo-methylation	-0.574936
1	423400	423800	hypo-methylation	-0.863963
1	423900	424200	hypo-methylation	-0.895539
1	424600	425700	hypo-methylation	-0.793212
1	426700	428600	hypo-methylation	-0.784118
1	428700	429100	hypo-methylation	-0.6569
1	434300	434700	hypo-methylation	-0.471575
1	462300	462800	hypo-methylation	-0.468641
1	464200	464500	hypo-methylation	-0.436346
1	532900	533500	hypo-methylation	-0.735169
1	550200	550500	hypo-methylation	-0.532914
1	556100	556200	hypo-methylation	-0.815268
1	564500	565100	hypo-methylation	-0.766235
1	565900	566500	hypo-methylation	-0.863702
1	570700	571300	hypo-methylation	-0.83682
1	572800	573000	hypo-methylation	-0.311373
1	590900	591600	hypo-methylation	-0.601589
1	625600	626000	hypo-methylation	-0.343708
1	640400	640700	hypo-methylation	-0.370235
1	717600	718100	hypo-methylation	-0.466104
1	807200	808200	hypo-methylation	-0.927231
1	846300	846900	hypo-methylation	-0.794118
1	926400	926700	hypo-methylation	-0.526425
1	929500	929900	hypo-methylation	-0.341562
1	1004800	1005300	hypo-methylation	-0.564027
1	1005500	1006300	hypo-methylation	-0.338046
1	1005500	1006300	hyper-methylation	0.354971
1	1017200	1017600	hypo-methylation	-0.487644
1	1034000	1034300	hypo-methylation	-0.399465
1	1036800	1037400	hypo-methylation	-0.423014
1	1040400	1040900	hypo-methylation	-0.658767
1	1078400	1078700	hypo-methylation	-0.2655
1	1086400	1086700	hypo-methylation	-0.407587
1	1094200	1094500	hypo-methylation	-0.31685
1	1101400	1101900	hypo-methylation	-0.742132
1	1102300	1103000	hypo-methylation	-0.750871
1	1105300	1105800	hypo-methylation	-0.587624
1	1121500	1122400	hypo-methylation	-0.553219
1	1128100	1128400	hypo-methylation	-0.529326
1	1150800	1151300	hypo-methylation	-0.632921
1	1166700	1166900	hypo-methylation	-0.328687
1	1173000	1173600	hypo-methylation	-0.740379
1	1177800	1178300	hypo-methylation	-0.618975
1	1184000	1184600	hypo-methylation	-0.308391
1	1490800	1491300	hypo-methylation	-0.594808
1	1542700	1543300	hypo-methylation	-0.668559
1	1544800	1545200	hypo-methylation	-0.617546
1	1545900	1546000	hypo-methylation	-0.414725
1	1547000	1547500	hypo-methylation	-0.548266
1	1606400	1606800	hypo-methylation	-0.697987
1	1608000	1608200	hypo-methylation	-0.46941
1	1617600	1618100	hypo-methylation	-0.831554
1	1618400	1619300	hypo-methylation	-0.734347
1	1629000	1629500	hypo-methylation	-0.48855
1	1647900	1648700	hypo-methylation	-0.69063
1	1651300	1651600	hypo-methylation	-0.390671
1	1655500	1656000	hypo-methylation	-0.721067
1	1659500	1660000	hypo-methylation	-0.473255
1	1661000	1661500	hypo-methylation	-0.329408
1	1662300	1663300	hypo-methylation	-0.833784
1	1692500	1693000	hypo-methylation	-0.451285
1	1704000	1704800	hypo-methylation	-0.435256
1	1722500	1723600	hypo-methylation	-0.4771
1	1732700	1732800	hypo-methylation	-0.53025
1	1733000	1733300	hypo-methylation	-0.532512
1	1734200	1735100	hypo-methylation	-0.675216
1	1735400	1736200	hypo-methylation	-0.762283
1	1752200	1752700	hypo-methylation	-0.588748
1	1752800	1753100	hypo-methylation	-0.611498
1	1754900	1755700	hypo-methylation	-0.69111
1	1759400	1759700	hypo-methylation	-0.395043
1	1761300	1761700	hypo-methylation	-0.396118
1	1774100	1774500	hypo-methylation	-0.53786
1	1779700	1780300	hypo-methylation	-0.476494
1	1792000	1792200	hypo-methylation	-0.380375
1	1796300	1797400	hypo-methylation	-0.731823
1	1800000	1800600	hypo-methylation	-0.825596
1	1809600	1810000	hypo-methylation	-0.40345
1	1811100	1811400	hypo-methylation	-0.756975
1	1813700	1814600	hypo-methylation	-0.868813
1	1845200	1845500	hypo-methylation	-0.821097
1	1845800	1846300	hypo-methylation	-0.72524
1	1850700	1851400	hypo-methylation	-0.663935
1	1852100	1852500	hypo-methylation	-0.927523
1	1853000	1853500	hypo-methylation	-0.559186
1	1877900	1878200	hypo-methylation	-0.564329
1	1878400	1878900	hypo-methylation	-0.639763
1	1887400	1887700	hypo-methylation	-0.420162
1	1889400	1889900	hypo-methylation	-0.598653
1	1894900	1895300	hypo-methylation	-0.478888
1	1896600	1897100	hypo-methylation	-0.601752
1	1897300	1897600	hypo-methylation	-0.521652
1	1911300	1912600	hypo-methylation	-0.777759
1	1936600	1936800	hypo-methylation	-0.463612
1	1936900	1937300	hypo-methylation	-0.527949
1	1950700	1951600	hypo-methylation	-0.490936
1	1958600	1959700	hypo-methylation	-0.540103
1	1958600	1959700	hyper-methylation	0.532795
1	1985700	1986600	hypo-methylation	-0.616429
1	2040400	2041100	hypo-methylation	-0.594385
1	2049600	2050200	hypo-methylation	-0.558887
1	2063000	2063400	hypo-methylation	-0.667796
1	2066100	2066400	hypo-methylation	-0.422369
1	2070500	2071100	hypo-methylation	-0.508412
1	2076200	2076600	hypo-methylation	-0.410271
1	2084400	2084700	hyper-methylation	0.543608
1	2093600	2094100	hypo-methylation	-0.3995
1	2103500	2104100	hypo-methylation	-0.455782
1	2115800	2116200	hypo-methylation	-0.550798
1	2132500	2133500	hypo-methylation	-0.718436
1	2146200	2146600	hypo-methylation	-0.597488
1	2146900	2147400	hypo-methylation	-0.703081
1	2148700	2149400	hypo-methylation	-0.718787
1	2150000	2150400	hypo-methylation	-0.409122
1	2151500	2152200	hypo-methylation	-0.864416
1	2156600	2156900	hypo-methylation	-0.360781
1	2161300	2162100	hypo-methylation	-0.803847
1	2163200	2164200	hypo-methylation	-0.614829
1	2170800	2171400	hypo-methylation	-0.591925
1	2174000	2174200	hypo-methylation	-0.316819
1	2176000	2176300	hypo-methylation	-0.493645
1	2176600	2177100	hypo-methylation	-0.461937
1	2208600	2208800	hypo-methylation	-0.342387
1	2210500	2211000	hypo-methylation	-0.729089
1	2221700	2222200	hypo-methylation	-0.898008
1	2223100	2223500	hypo-methylation	-0.507494
1	2223800	2223900	hypo-methylation	-0.473148
1	2225200	2225900	hypo-methylation	-0.725499
1	2247000	2247400	hypo-methylation	-0.556848
1	2247500	2248100	hypo-methylation	-0.553027
1	2249000	2249100	hypo-methylation	-0.260633
1	2249300	2249600	hypo-methylation	-0.275696
1	2253400	2253900	hypo-methylation	-0.819815
1	2262800	2263100	hypo-methylation	-0.61622
1	2267800	2268200	hypo-methylation	-0.83065
1	2277000	2277300	hypo-methylation	-0.606838
1	2277000	2277300	hypo-methylation	-0.683091
1	2277400	2277500	hypo-methylation	-0.420112
1	2277400	2277500	hypo-methylation	-0.496367
1	2277800	2278100	hypo-methylation	-0.298393
1	2277800	2278100	hypo-methylation	-0.374648
1	2291700	2292200	hypo-methylation	-0.510034
1	2316600	2317000	hypo-methylation	-0.435902
1	2330600	2330800	hypo-methylation	-0.462318
1	2343400	2343800	hypo-methylation	-0.351965
1	2351700	2352200	hypo-methylation	-0.910116
1	2353800	2354300	hypo-methylation	-0.666433
1	2360600	2361100	hypo-methylation	-0.627954
1	2361200	2362000	hypo-methylation	-0.707793
1	2362100	2362400	hypo-methylation	-0.752765
1	2373000	2373200	hypo-methylation	-0.255837
1	2385600	2385900	hypo-methylation	-0.469375
1	2403700	2404300	hypo-methylation	-0.844774
1	2404400	2405100	hypo-methylation	-0.835118
1	2405400	2406000	hypo-methylation	-0.787739
1	2418800	2419200	hypo-methylation	-0.626536
1	2419700	2420300	hypo-methylation	-0.770241
1	2425000	2425100	hypo-methylation	-0.472203
1	2425300	2425900	hypo-methylation	-0.564416
1	2533800	2534100	hypo-methylation	-0.268182
1	2534300	2534500	hypo-methylation	-0.295482
1	2538200	2538700	hypo-methylation	-0.513288
1	2544000	2544400	hypo-methylation	-0.415659
1	2546700	2547400	hypo-methylation	-0.727784
1	2551400	2551700	hypo-methylation	-0.314825
1	2555700	2555900	hypo-methylation	-0.727276
1	2556400	2556600	hypo-methylation	-0.595233
1	2558900	2559400	hypo-methylation	-0.560277
1	2559600	2560100	hypo-methylation	-0.739658
1	2595700	2596500	hypo-methylation	-0.716867
1	2598100	2599000	hypo-methylation	-0.798673
1	2600400	2600500	hypo-methylation	-0.671091
1	2600600	2600900	hypo-methylation	-0.5036
1	2617300	2617700	hypo-methylation	-0.782309
1	2617900	2618600	hypo-methylation	-0.620025
1	2620700	2621800	hypo-methylation	-0.579989
1	2622100	2622500	hypo-methylation	-0.772881
1	2634000	2634500	hypo-methylation	-0.774496
1	2634800	2635300	hypo-methylation	-0.675191
1	2635500	2636800	hypo-methylation	-0.892934
1	2637000	2637500	hypo-methylation	-0.788075
1	2640700	2641200	hypo-methylation	-0.63595
1	2647500	2647800	hypo-methylation	-0.238992
1	2649300	2649500	hypo-methylation	-0.445073
1	2649600	2649900	hypo-methylation	-0.473442
1	2653800	2654000	hypo-methylation	-0.746493
1	2654500	2655100	hypo-methylation	-0.50965
1	2667700	2668300	hypo-methylation	-0.843341
1	2695600	2696100	hypo-methylation	-0.853633
1	2701500	2702300	hypo-methylation	-0.386926
1	2711800	2712100	hypo-methylation	-0.402958
1	2724600	2725200	hypo-methylation	-0.635896
1	2740600	2741200	hypo-methylation	-0.68657
1	2742300	2742800	hypo-methylation	-0.566354
1	2743300	2743600	hypo-methylation	-0.453819
1	2743900	2744700	hypo-methylation	-0.783315
1	2751400	2752000	hypo-methylation	-0.575842
1	2772000	2772700	hypo-methylation	-0.734392
1	2792700	2793200	hypo-methylation	-0.717264
1	2793400	2793800	hypo-methylation	-0.766894
1	2797800	2798200	hypo-methylation	-0.379721
1	2839100	2839700	hypo-methylation	-0.791556
1	2841200	2841700	hypo-methylation	-0.792221
1	2850200	2850700	hypo-methylation	-0.514333
1	2867700	2868700	hypo-methylation	-0.551416
1	2869200	2870000	hypo-methylation	-0.612221
1	2870100	2870400	hypo-methylation	-0.69778
1	2896200	2896900	hypo-methylation	-0.510937
1	2898300	2898900	hypo-methylation	-0.444659
1	2900500	2901000	hypo-methylation	-0.408392
1	2904900	2906100	hypo-methylation	-0.623889
1	2923300	2923900	hypo-methylation	-0.687462
1	2925000	2925900	hypo-methylation	-0.726603
1	2929400	2929500	hypo-methylation	-0.508189
1	2930400	2930700	hypo-methylation	-0.462471
1	2967300	2967800	hypo-methylation	-0.618007
1	2969500	2969900	hypo-methylation	-0.605061
1	2970100	2970400	hypo-methylation	-0.516003
1	2988200	2988400	hypo-methylation	-0.437062
1	3042900	3043200	hypo-methylation	-0.855406
1	3045200	3045600	hypo-methylation	-0.602133
1	3048300	3048700	hypo-methylation	-0.922383
1	3049300	3049700	hypo-methylation	-0.734177
1	3050000	3050500	hypo-methylation	-0.845977
1	3050800	3051100	hypo-methylation	-0.884583
1	3051200	3051300	hypo-methylation	-0.808064
1	3087400	3087700	hypo-methylation	-0.959775
1	3088400	3088800	hypo-methylation	-0.949133
1	3089100	3090000	hypo-methylation	-0.860378
1	3096600	3096900	hyper-methylation	0.3644
1	3097000	3097400	hypo-methylation	-0.409944
1	3101400	3101900	hypo-methylation	-0.597984
1	3106100	3106700	hypo-methylation	-0.827282
1	3111100	3111500	hypo-methylation	-0.549384
1	3111600	3112100	hypo-methylation	-0.698762
1	3112900	3113400	hypo-methylation	-0.430271
1	3150800	3151300	hypo-methylation	-0.744096
1	3183200	3183700	hypo-methylation	-0.629011
1	3183800	3184100	hypo-methylation	-0.534786
1	3220200	3220400	hypo-methylation	-0.393236
1	3221400	3221700	hypo-methylation	-0.451896
1	3250200	3250300	hypo-methylation	-0.328746
1	3260900	3261100	hypo-methylation	-0.375544
1	3308300	3308600	hypo-methylation	-0.642934
1	3309600	3309900	hypo-methylation	-0.344247
1	3314500	3315200	hypo-methylation	-0.469429
1	3319600	3320200	hypo-methylation	-0.684446
1	3326600	3327600	hypo-methylation	-0.674594
1	3330400	3331300	hypo-methylation	-0.654779
1	3333500	3334400	hypo-methylation	-0.688182
1	3336800	3337600	hypo-methylation	-0.702797
1	3341600	3342000	hypo-methylation	-0.459862
1	3345800	3346000	hypo-methylation	-0.387165
1	3347700	3348700	hypo-methylation	-0.707653
1	3348900	3349200	hypo-methylation	-0.652042
1	3353200	3353700	hypo-methylation	-0.446723
1	3357800	3358900	hypo-methylation	-0.874915
1	3365800	3366300	hypo-methylation	-0.536202
1	3368700	3369000	hypo-methylation	-0.40401
1	3369600	3369800	hypo-methylation	-0.368459
1	3379800	3380300	hypo-methylation	-0.607967
1	3382200	3382800	hypo-methylation	-0.767848
1	3386100	3386600	hypo-methylation	-0.609263
1	3392500	3393000	hypo-methylation	-0.708027
1	3393300	3393800	hypo-methylation	-0.551163
1	3406900	3407400	hypo-methylation	-0.419384
1	3409200	3409600	hypo-methylation	-0.388979
1	3453000	3453800	hypo-methylation	-0.652729
1	3472400	3472700	hypo-methylation	-0.531702
1	3482700	3482900	hypo-methylation	-0.31414
1	3495300	3495900	hypo-methylation	-0.608728
1	3502100	3502700	hypo-methylation	-0.819389
1	3507800	3508700	hypo-methylation	-0.686103
1	3512600	3513100	hypo-methylation	-0.32165
1	3523400	3523800	hypo-methylation	-0.470631
1	3525900	3527100	hypo-methylation	-0.91698
1	3529000	3529600	hypo-methylation	-0.693083
1	3535000	3535200	hypo-methylation	-0.338771
1	3537300	3537600	hypo-methylation	-0.4971
1	3544000	3544100	hyper-methylation	0.305525
1	3544000	3544100	hyper-methylation	0.3448
1	3544500	3545100	hypo-methylation	-0.397196
1	3571000	3571500	hypo-methylation	-0.870092
1	3572000	3572300	hypo-methylation	-0.49825
1	3572900	3573300	hypo-methylation	-0.910717
1	3599800	3599900	hypo-methylation	-0.2908
1	3629400	3629800	hypo-methylation	-0.373066
1	3630800	3631400	hypo-methylation	-0.668324
1	3657700	3658000	hypo-methylation	-0.364627
1	3667000	3668100	hypo-methylation	-0.58141
1	3668500	3668900	hypo-methylation	-0.456075
1	3669700	3670200	hypo-methylation	-0.65083
1	3671400	3671700	hypo-methylation	-0.518073
1	3691700	3692200	hypo-methylation	-0.447855
1	3693000	3693500	hypo-methylation	-0.450152
1	3700200	3700600	hypo-methylation	-0.684063
1	3701100	3702400	hypo-methylation	-0.802629
1	3703400	3703800	hypo-methylation	-0.45875
1	3714500	3714800	hypo-methylation	-0.57035
1	3717200	3718000	hypo-methylation	-0.873489
1	3719100	3719300	hypo-methylation	-0.308362
1	3721500	3721900	hypo-methylation	-0.605838
1	3737100	3737500	hypo-methylation	-0.414073
1	3739800	3740300	hypo-methylation	-0.835949
1	3741300	3741400	hypo-methylation	-0.531809
1	3747000	3747700	hypo-methylation	-0.390142
1	3747000	3747700	hyper-methylation	0.363204
1	3747000	3747700	hyper-methylation	0.386479
1	3786500	3786700	hypo-methylation	-0.871779
1	3807700	3808000	hypo-methylation	-0.41765
1	3807700	3808000	hypo-methylation	-0.446634
1	3808100	3808500	hyper-methylation	0.46903
1	3825300	3825800	hypo-methylation	-0.936689
1	3828200	3828800	hypo-methylation	-0.765419
1	3854100	3854400	hypo-methylation	-0.477054
1	3856500	3857100	hypo-methylation	-0.496005
1	3873100	3873600	hypo-methylation	-0.494884
1	3930000	3930800	hypo-methylation	-0.499912
1	3931900	3932200	hypo-methylation	-0.408397
1	3956200	3956700	hypo-methylation	-0.677657
1	3956800	3957600	hypo-methylation	-0.705955
1	3970400	3970600	hypo-methylation	-0.265625
1	3974900	3975600	hypo-methylation	-0.673628
1	3979100	3979600	hypo-methylation	-0.624432
1	3987600	3987900	hypo-methylation	-0.430231
1	3989400	3989700	hypo-methylation	-0.907317
1	3990700	3991500	hypo-methylation	-0.508418
1	3990700	3991500	hypo-methylation	-0.556102
1	3990700	3991500	hypo-methylation	-0.573315
1	3990700	3991500	hypo-methylation	-0.621
1	3991900	3992000	hypo-methylation	-0.458417
1	3991900	3992000	hypo-methylation	-0.506101
1	3991900	3992000	hypo-methylation	-0.523314
1	3991900	3992000	hypo-methylation	-0.570998
1	4007600	4007900	hypo-methylation	-0.458796
1	4011300	4011600	hypo-methylation	-0.264342
1	4016700	4017300	hypo-methylation	-0.885661
1	4018800	4020100	hypo-methylation	-0.618183
1	4032400	4032500	hypo-methylation	-0.381617
1	4073800	4074500	hypo-methylation	-0.695628
1	4084700	4085800	hypo-methylation	-0.659714
1	4086600	4087100	hypo-methylation	-0.615606
1	4087200	4087700	hypo-methylation	-0.5777
1	4092200	4093200	hypo-methylation	-0.543735
1	4097000	4097700	hypo-methylation	-0.737214
1	4116600	4116700	hypo-methylation	-0.502047
1	4117200	4117700	hypo-methylation	-0.695567
1	4119600	4120100	hypo-methylation	-0.670065
1	4124000	4124900	hypo-methylation	-0.732035
1	4128100	4128500	hypo-methylation	-0.723523
1	4128600	4129100	hypo-methylation	-0.836089
1	4133100	4133600	hypo-methylation	-0.961283
1	4134400	4134700	hypo-methylation	-0.7739
1	4134900	4135300	hypo-methylation	-0.950904
1	4141400	4142300	hypo-methylation	-0.836203
1	4155300	4155700	hypo-methylation	-0.39545
1	4157400	4157800	hypo-methylation	-0.438529
1	4159600	4160100	hypo-methylation	-0.428812
1	4211400	4211900	hypo-methylation	-0.859222
1	4220300	4220800	hypo-methylation	-0.427773
1	4220300	4220800	hypo-methylation	-0.484673
1	4221000	4221300	hypo-methylation	-0.393598
1	4221000	4221300	hypo-methylation	-0.450498
1	4226800	4227600	hypo-methylation	-0.570496
1	4228800	4230000	hypo-methylation	-0.745294
1	4232100	4232500	hypo-methylation	-0.446
1	4238000	4238500	hypo-methylation	-0.430219
1	4243300	4243700	hypo-methylation	-0.3991
1	4252200	4252900	hypo-methylation	-0.6422
1	4252200	4252900	hyper-methylation	0.377571
1	4255700	4256100	hypo-methylation	-0.432797
1	4258300	4259000	hypo-methylation	-0.46095
1	4259700	4260300	hypo-methylation	-0.62697
1	4260800	4261800	hypo-methylation	-0.830896
1	4262800	4263300	hypo-methylation	-0.39101
1	4264700	4265100	hypo-methylation	-0.349192
1	4268000	4268600	hypo-methylation	-0.917444
1	4270300	4271300	hypo-methylation	-0.897417
1	4271600	4271800	hypo-methylation	-0.621926
1	4297000	4297600	hypo-methylation	-0.537096
1	4305000	4305300	hypo-methylation	-0.377625
1	4305500	4306700	hypo-methylation	-0.742315
1	4310800	4311300	hypo-methylation	-0.52325
1	4314300	4314500	hypo-methylation	-0.67544
1	4314600	4315100	hypo-methylation	-0.836766
1	4315800	4316400	hypo-methylation	-0.654925
1	4318900	4319300	hypo-methylation	-0.894881
1	4325100	4325400	hypo-methylation	-0.456213
1	4336900	4337500	hypo-methylation	-0.703699
1	4339300	4339900	hypo-methylation	-0.593888
1	4344300	4344700	hypo-methylation	-0.3428
1	4349600	4349900	hypo-methylation	-0.468154
1	4352600	4353100	hypo-methylation	-0.385798
1	4368300	4368700	hypo-methylation	-0.478792
1	4372000	4372800	hypo-methylation	-0.820107
1	4372000	4372800	hyper-methylation	0.623042
1	4374800	4375100	hypo-methylation	-0.526135
1	4378800	4379300	hypo-methylation	-0.462225
1	4413600	4413900	hypo-methylation	-0.617727
1	4420700	4420800	hypo-methylation	-0.264479
1	4424000	4424500	hypo-methylation	-0.551667
1	4435700	4436100	hypo-methylation	-0.433075
1	4440200	4440500	hypo-methylation	-0.45145
1	4443300	4443800	hypo-methylation	-0.527162
1	4443900	4444100	hypo-methylation	-0.405438
1	4446300	4447600	hypo-methylation	-0.738398
1	4498800	4499900	hypo-methylation	-0.91759
1	4500000	4500400	hypo-methylation	-0.958869
1	4500500	4501200	hypo-methylation	-0.939606
1	4502500	4503000	hypo-methylation	-0.821257
1	4503100	4503700	hypo-methylation	-0.722932
1	4507200	4507800	hypo-methylation	-0.408875
1	4507200	4507800	hyper-methylation	0.492025
1	4518500	4518900	hypo-methylation	-0.347254
1	4533300	4533700	hypo-methylation	-0.566184
1	4573700	4574400	hypo-methylation	-0.298125
1	4573700	4574400	hypo-methylation	-0.332838
1	4589200	4589600	hypo-methylation	-0.653987
1	4590100	4590700	hypo-methylation	-0.560316
1	4597500	4597600	hypo-methylation	-0.381621
1	4612200	4612300	hypo-methylation	-0.310818
1	4616800	4616900	hypo-methylation	-0.272469
1	4618500	4618800	hypo-methylation	-0.311769
1	4622800	4623300	hypo-methylation	-0.460354
1	4629800	4630100	hypo-methylation	-0.575749
1	4634100	4634400	hypo-methylation	-0.259575
1	4634800	4635300	hypo-methylation	-0.425077
1	4637500	4637800	hypo-methylation	-0.373818
1	4645200	4645800	hypo-methylation	-0.81589
1	4650700	4651200	hypo-methylation	-0.335881
1	4674500	4674900	hypo-methylation	-0.662791
1	4676400	4676500	hypo-methylation	-0.86808
1	4676600	4677600	hypo-methylation	-0.854876
1	4682700	4683500	hypo-methylation	-0.934902
1	4695700	4696200	hypo-methylation	-0.644448
1	4702600	4703300	hypo-methylation	-0.694544
1	4703500	4703700	hypo-methylation	-0.772579
1	4711600	4712000	hypo-methylation	-0.76255
1	4712700	4713000	hypo-methylation	-0.631596
1	4719500	4720100	hypo-methylation	-0.524225
1	4738000	4738400	hypo-methylation	-0.498858
1	4745200	4745400	hypo-methylation	-0.403378
1	4746300	4746800	hypo-methylation	-0.750684
1	4747500	4747700	hypo-methylation	-0.500296
1	4756600	4757100	hypo-methylation	-0.579475
1	4770600	4771000	hypo-methylation	-0.543678
1	4772300	4772800	hypo-methylation	-0.935502
1	4790900	4791300	hypo-methylation	-0.847933
1	4799700	4800100	hypo-methylation	-0.459044
1	4807000	4807600	hypo-methylation	-0.564455
1	4810700	4811200	hypo-methylation	-0.654443
1	4849800	4851600	hypo-methylation	-0.682101
1	4853400	4853700	hypo-methylation	-0.483807
1	4876400	4876900	hypo-methylation	-0.571191
1	4920300	4920800	hypo-methylation	-0.364716
1	4930300	4930800	hypo-methylation	-0.367335
1	4960600	4961100	hypo-methylation	-0.427361
1	4969800	4970200	hypo-methylation	-0.259879
1	5005700	5006900	hypo-methylation	-0.780336
1	5023200	5023700	hypo-methylation	-0.79946
1	5024200	5024700	hypo-methylation	-0.70478
1	5044800	5045800	hypo-methylation	-0.693326
1	5047800	5048100	hyper-methylation	0.375988
1	5061600	5062000	hypo-methylation	-0.735298
1	5063000	5063500	hypo-methylation	-0.804187
1	5063700	5064200	hypo-methylation	-0.616928
1	5082000	5082400	hypo-methylation	-0.372638
1	5084300	5084700	hypo-methylation	-0.409231
1	5092300	5093100	hypo-methylation	-0.853598
1	5095400	5095600	hypo-methylation	-0.462491
1	5096000	5096300	hypo-methylation	-0.496125
1	5096900	5097400	hypo-methylation	-0.532949
1	5139500	5140200	hypo-methylation	-0.789055
1	5166200	5166400	hypo-methylation	-0.3733
1	5168900	5169600	hypo-methylation	-0.623386
1	5174100	5174700	hypo-methylation	-0.512549
1	5189900	5190400	hypo-methylation	-0.596713
1	5193500	5194200	hypo-methylation	-0.392809
1	5194600	5195400	hypo-methylation	-0.483642
1	5195900	5196500	hypo-methylation	-0.359527
1	5197000	5198200	hypo-methylation	-0.499045
1	5205300	5205800	hypo-methylation	-0.619568
1	5207400	5207700	hypo-methylation	-0.480327
1	5211700	5212200	hypo-methylation	-0.716647
1	5212400	5212800	hypo-methylation	-0.432631
1	5214400	5215100	hypo-methylation	-0.803895
1	5217000	5218500	hypo-methylation	-0.799631
1	5219500	5220200	hypo-methylation	-0.735418
1	5232600	5233000	hypo-methylation	-0.429886
1	5235600	5236000	hypo-methylation	-0.339546
1	5257400	5257900	hypo-methylation	-0.876588
1	5259100	5259600	hypo-methylation	-0.584466
1	5266700	5267400	hypo-methylation	-0.603502
1	5291700	5292100	hypo-methylation	-0.789554
1	5298500	5298800	hypo-methylation	-0.577272
1	5300900	5301400	hypo-methylation	-0.385637
1	5306600	5306900	hypo-methylation	-0.374092
1	5310100	5310300	hypo-methylation	-0.731675
1	5313500	5314000	hypo-methylation	-0.869206
1	5316700	5317300	hypo-methylation	-0.785629
1	5317500	5317800	hypo-methylation	-0.830709
1	5319900	5320500	hypo-methylation	-0.8523
1	5320900	5321500	hypo-methylation	-0.838469
1	5334500	5334700	hypo-methylation	-0.323712
1	5342800	5343500	hypo-methylation	-0.680507
1	5372300	5372600	hypo-methylation	-0.308802
1	5375400	5375900	hypo-methylation	-0.572309
1	5377200	5377900	hypo-methylation	-0.522755
1	5388400	5388800	hypo-methylation	-0.420252
1	5395000	5395400	hypo-methylation	-0.421915
1	5415300	5416100	hypo-methylation	-0.630433
1	5431900	5432400	hypo-methylation	-0.377712
1	5448500	5448800	hypo-methylation	-0.417334
1	5452900	5453400	hypo-methylation	-0.462952
1	5496000	5496300	hypo-methylation	-0.595955
1	5500800	5501300	hypo-methylation	-0.477442
1	5514700	5515000	hypo-methylation	-0.564442
1	5515700	5518000	hypo-methylation	-0.894611
1	5518700	5519700	hypo-methylation	-0.83784
1	5522500	5523000	hypo-methylation	-0.382931
1	5525600	5526100	hypo-methylation	-0.502072
1	5526700	5527700	hypo-methylation	-0.756294
1	5531300	5532500	hypo-methylation	-0.884754
1	5534700	5534800	hypo-methylation	-0.298588
1	5535600	5536300	hypo-methylation	-0.624286
1	5537300	5537700	hypo-methylation	-0.626209
1	5542700	5543100	hypo-methylation	-0.724842
1	5544700	5546000	hypo-methylation	-0.903263
1	5548000	5548400	hypo-methylation	-0.722718
1	5548500	5549400	hypo-methylation	-0.80181
1	5552000	5552500	hypo-methylation	-0.565811
1	5552900	5553300	hypo-methylation	-0.547006
1	5574700	5575200	hypo-methylation	-0.505763
1	5577600	5579400	hypo-methylation	-0.786955
1	5585500	5586500	hypo-methylation	-0.771369
1	5586800	5587900	hypo-methylation	-0.762125
1	5588600	5589100	hypo-methylation	-0.714659
1	5589300	5590400	hypo-methylation	-0.737784
1	5590600	5591100	hypo-methylation	-0.522765
1	5599600	5602200	hypo-methylation	-0.712128
1	5604700	5606900	hypo-methylation	-0.743758
1	5608500	5609300	hypo-methylation	-0.503872
1	5625200	5625600	hypo-methylation	-0.507095
1	5626100	5626600	hypo-methylation	-0.804099
1	5626800	5628800	hypo-methylation	-0.786867
1	5630400	5630600	hypo-methylation	-0.387025
1	5631900	5632400	hypo-methylation	-0.48791
1	5633600	5634100	hypo-methylation	-0.760583
1	5635900	5636300	hypo-methylation	-0.544282
1	5636400	5636600	hypo-methylation	-0.620136
1	5644500	5644800	hypo-methylation	-0.446863
1	5656300	5657200	hypo-methylation	-0.493925
1	5660800	5661000	hypo-methylation	-0.366235
1	5662300	5662400	hypo-methylation	-0.824056
1	5675000	5675500	hypo-methylation	-0.765708
1	5677000	5677400	hypo-methylation	-0.3017
1	5691800	5692300	hypo-methylation	-0.438327
1	5693400	5693900	hypo-methylation	-0.606548
1	5831400	5831900	hypo-methylation	-0.867533
1	5835000	5835500	hypo-methylation	-0.410938
1	5836800	5837300	hypo-methylation	-0.956175
1	5843700	5844100	hypo-methylation	-0.464287
1	5851100	5851600	hypo-methylation	-0.497861
1	5851900	5852200	hypo-methylation	-0.675747
1	5852500	5854400	hypo-methylation	-0.86552
1	5855100	5855400	hypo-methylation	-0.3109
1	5858200	5859000	hypo-methylation	-0.66488
1	5859100	5860300	hypo-methylation	-0.55571
1	5868800	5869000	hypo-methylation	-0.332625
1	5941400	5941800	hypo-methylation	-0.400562
1	5942800	5943200	hypo-methylation	-0.418234
1	5949500	5950100	hypo-methylation	-0.54264
1	5950700	5951200	hypo-methylation	-0.927849
1	5956500	5957000	hypo-methylation	-0.523608
1	5966300	5967100	hypo-methylation	-0.363453
1	5970500	5970900	hypo-methylation	-0.353617
1	5973000	5973300	hypo-methylation	-0.443987
1	5973400	5973800	hypo-methylation	-0.408138
1	5978000	5978600	hypo-methylation	-0.475961
1	5990300	5990800	hypo-methylation	-0.731
1	6015200	6015500	hypo-methylation	-0.450346
1	6110700	6111200	hypo-methylation	-0.966335
1	6144600	6145400	hypo-methylation	-0.746857
1	6146100	6146600	hypo-methylation	-0.522409
1	6149000	6149500	hypo-methylation	-0.3912
1	6169600	6169900	hypo-methylation	-0.37235
1	6190100	6190900	hypo-methylation	-0.679685
1	6194700	6195400	hypo-methylation	-0.567701
1	6197900	6198400	hypo-methylation	-0.542304
1	6198600	6199100	hypo-methylation	-0.601196
1	6214800	6215500	hypo-methylation	-0.582782
1	6238000	6238300	hypo-methylation	-0.345361
1	6241400	6241500	hypo-methylation	-0.261788
1	6276300	6276500	hypo-methylation	-0.445009
1	6285300	6285800	hypo-methylation	-0.495079
1	6287300	6287600	hypo-methylation	-0.37105
1	6295400	6295800	hypo-methylation	-0.410326
1	6323500	6324000	hypo-methylation	-0.561906
1	6330600	6331300	hypo-methylation	-0.892497
1	6332400	6333600	hypo-methylation	-0.80557
1	6334000	6334800	hypo-methylation	-0.752706
1	6337200	6337300	hypo-methylation	-0.452618
1	6338600	6339400	hypo-methylation	-0.402554
1	6355700	6356100	hypo-methylation	-0.395906
1	6356400	6356900	hypo-methylation	-0.478181
1	6357000	6357500	hypo-methylation	-0.450997
1	6357900	6358400	hypo-methylation	-0.536855
1	6359200	6359800	hypo-methylation	-0.766536
1	6381100	6381300	hypo-methylation	-0.3274
1	6386400	6386800	hypo-methylation	-0.315219
1	6439000	6440500	hypo-methylation	-0.846533
1	6441500	6442400	hypo-methylation	-0.842697
1	6443700	6444100	hypo-methylation	-0.372496
1	6452400	6452800	hypo-methylation	-0.444437
1	6456800	6457200	hypo-methylation	-0.405584
1	6457700	6459100	hypo-methylation	-0.536049
1	6468100	6468800	hypo-methylation	-0.601223
1	6476200	6476600	hypo-methylation	-0.505906
1	6488000	6488500	hypo-methylation	-0.591638
1	6488800	6489400	hypo-methylation	-0.834769
1	6497200	6497600	hypo-methylation	-0.397025
1	6498300	6498800	hypo-methylation	-0.474675
1	6499700	6500000	hypo-methylation	-0.603009
1	6508200	6508400	hypo-methylation	-0.526449
1	6510100	6510600	hypo-methylation	-0.911811
1	6521600	6522300	hypo-methylation	-0.714387
1	6523100	6523300	hypo-methylation	-0.517108
1	6543100	6543400	hypo-methylation	-0.485409
1	6545100	6546000	hypo-methylation	-0.649493
1	6562400	6562900	hypo-methylation	-0.465766
1	6563000	6563300	hypo-methylation	-0.383795
1	6565300	6565700	hypo-methylation	-0.529471
1	6566500	6566900	hypo-methylation	-0.57149
1	6571800	6572200	hypo-methylation	-0.629475
1	6574700	6575400	hypo-methylation	-0.674729
1	6575700	6576200	hypo-methylation	-0.734352
1	6578900	6579600	hypo-methylation	-0.804349
1	6580100	6580400	hypo-methylation	-0.556023
1	6580800	6581300	hypo-methylation	-0.542809
1	6631100	6631200	hypo-methylation	-0.45213
1	6647200	6647400	hypo-methylation	-0.380529
1	6664500	6665000	hypo-methylation	-0.835254
1	6665200	6665600	hypo-methylation	-0.578075
1	6685200	6685700	hypo-methylation	-0.853022
1	6691700	6692300	hypo-methylation	-0.652442
1	6705300	6705900	hypo-methylation	-0.430044
1	6706700	6707700	hypo-methylation	-0.785708
1	6721600	6722100	hypo-methylation	-0.567786
1	6777400	6778000	hypo-methylation	-0.621679
1	6783700	6785000	hypo-methylation	-0.656004
1	6785100	6785600	hypo-methylation	-0.830122
1	6805400	6805800	hypo-methylation	-0.485685
1	6811600	6812100	hypo-methylation	-0.425185
1	6836400	6836500	hypo-methylation	-0.467779
1	6848600	6849000	hypo-methylation	-0.496787
1	6850500	6851100	hypo-methylation	-0.407822
1	6851500	6852000	hypo-methylation	-0.503883
1	6865600	6866100	hypo-methylation	-0.901728
1	6869200	6869800	hypo-methylation	-0.788319
1	6869900	6871400	hypo-methylation	-0.80001
1	6872600	6873200	hypo-methylation	-0.724869
1	6886000	6886900	hypo-methylation	-0.524747
1	6886000	6886900	hypo-methylation	-0.583518
1	6915400	6916000	hypo-methylation	-0.754123
1	6916500	6917100	hypo-methylation	-0.913554
1	6917300	6917600	hypo-methylation	-0.667633
1	6942600	6943200	hypo-methylation	-0.748952
1	6965400	6965700	hypo-methylation	-0.536682
1	6966100	6966400	hypo-methylation	-0.588731
1	6966900	6967500	hypo-methylation	-0.864068
1	6968700	6969200	hypo-methylation	-0.69196
1	6980300	6980800	hypo-methylation	-0.753192
1	6981600	6982000	hypo-methylation	-0.793559
1	6982700	6983200	hypo-methylation	-0.735089
1	6987600	6987900	hypo-methylation	-0.364888
1	6993900	6994200	hypo-methylation	-0.379841
1	7008700	7008800	hypo-methylation	-0.303279
1	7013000	7013300	hypo-methylation	-0.265834
1	7018100	7018900	hypo-methylation	-0.385885
1	7026100	7026500	hypo-methylation	-0.596545
1	7027100	7027400	hypo-methylation	-0.43125
1	7027800	7028900	hypo-methylation	-0.860911
1	7034500	7035000	hypo-methylation	-0.781786
1	7039400	7039700	hypo-methylation	-0.616237
1	7052200	7052500	hypo-methylation	-0.435554
1	7054200	7054400	hypo-methylation	-0.340083
1	7054500	7054700	hypo-methylation	-0.405583
1	7062400	7063300	hypo-methylation	-0.703678
1	7073500	7074000	hypo-methylation	-0.576862
1	7074600	7075000	hypo-methylation	-0.541816
1	7090300	7091200	hypo-methylation	-0.609117
1	7103300	7103500	hypo-methylation	-0.341913
1	7103600	7103900	hypo-methylation	-0.304712
1	7105200	7105700	hypo-methylation	-0.309983
1	7116900	7117500	hypo-methylation	-0.381352
1	7119800	7120200	hyper-methylation	0.380988
1	7135100	7135700	hypo-methylation	-0.32205
1	7135100	7135700	hyper-methylation	0.332863
1	7137700	7138200	hypo-methylation	-0.573604
1	7138900	7139400	hypo-methylation	-0.419668
1	7140700	7141300	hypo-methylation	-0.5969
1	7143500	7144100	hypo-methylation	-0.609226
1	7145600	7145900	hypo-methylation	-0.465721
1	7147800	7148400	hypo-methylation	-0.800194
1	7153800	7155000	hypo-methylation	-0.761033
1	7156800	7157100	hypo-methylation	-0.396848
1	7165900	7166500	hypo-methylation	-0.76696
1	7168700	7169600	hypo-methylation	-0.911804
1	7169700	7169800	hypo-methylation	-0.907556
1	7170600	7171100	hypo-methylation	-0.914231
1	7171200	7172100	hypo-methylation	-0.878406
1	7172600	7173600	hypo-methylation	-0.77978
1	7177900	7178300	hypo-methylation	-0.378212
1	7180700	7181200	hypo-methylation	-0.642908
1	7198100	7198700	hypo-methylation	-0.846795
1	7203000	7203700	hypo-methylation	-0.612498
1	7218000	7218300	hypo-methylation	-0.271566
1	7219800	7220300	hypo-methylation	-0.379127
1	7226200	7226700	hypo-methylation	-0.5102
1	7228800	7230100	hypo-methylation	-0.559878
1	7234100	7234300	hypo-methylation	-0.387158
1	7242400	7243000	hypo-methylation	-0.893444
1	7244000	7244800	hypo-methylation	-0.747695
1	7247400	7247900	hypo-methylation	-0.567387
1	7249100	7249400	hypo-methylation	-0.543346
1	7251400	7251900	hypo-methylation	-0.415959
1	7255100	7255800	hypo-methylation	-0.641595
1	7279300	7279600	hypo-methylation	-0.489475
1	7283300	7283800	hypo-methylation	-0.576031
1	7285000	7285600	hypo-methylation	-0.850019
1	7295800	7296400	hypo-methylation	-0.68198
1	7310900	7311500	hypo-methylation	-0.683171
1	7313500	7314200	hypo-methylation	-0.543972
1	7314600	7314800	hypo-methylation	-0.439932
1	7317300	7317900	hypo-methylation	-0.462834
1	7318000	7318300	hypo-methylation	-0.34263
1	7326100	7326400	hypo-methylation	-0.282199
1	7331600	7331800	hypo-methylation	-0.467575
1	7339600	7339800	hypo-methylation	-0.385747
1	7339900	7340200	hypo-methylation	-0.38881
1	7349200	7349500	hypo-methylation	-0.6306
1	7355300	7355600	hypo-methylation	-0.5394
1	7357900	7358100	hypo-methylation	-0.632275
1	7360600	7361100	hypo-methylation	-0.422696
1	7366600	7367200	hypo-methylation	-0.680806
1	7392200	7392700	hypo-methylation	-0.543139
1	7395900	7396400	hypo-methylation	-0.391375
1	7412700	7413200	hypo-methylation	-0.463815
1	7423200	7423800	hypo-methylation	-0.798188
1	7426800	7427000	hypo-methylation	-0.350811
1	7435900	7437300	hypo-methylation	-0.518168
1	7435900	7437300	hypo-methylation	-0.550124
1	7442200	7442400	hypo-methylation	-0.536519
1	7443600	7443900	hypo-methylation	-0.473061
1	7444300	7444800	hypo-methylation	-0.592216
1	7445500	7446000	hypo-methylation	-0.445559
1	7448500	7449100	hypo-methylation	-0.818334
1	7452100	7452800	hypo-methylation	-0.706692
1	7454100	7455500	hypo-methylation	-0.806153
1	7455800	7456200	hypo-methylation	-0.638168
1	7460700	7461400	hypo-methylation	-0.557279
1	7462900	7463500	hypo-methylation	-0.838078
1	7466700	7467100	hypo-methylation	-0.448245
1	7469100	7469800	hypo-methylation	-0.707734
1	7483300	7483700	hypo-methylation	-0.57198
1	7485000	7485600	hypo-methylation	-0.671386
1	7486600	7486900	hypo-methylation	-0.265412
1	7487300	7487600	hypo-methylation	-0.523084
1	7487700	7488100	hypo-methylation	-0.298471
1	7498600	7500100	hypo-methylation	-0.90447
1	7500700	7501900	hypo-methylation	-0.915971
1	7505000	7505800	hypo-methylation	-0.793393
1	7515100	7515400	hypo-methylation	-0.493181
1	7523700	7524000	hypo-methylation	-0.643589
1	7534300	7535300	hypo-methylation	-0.660803
1	7535500	7536000	hypo-methylation	-0.761161
1	7536400	7536700	hypo-methylation	-0.396946
1	7540400	7540500	hypo-methylation	-0.262856
1	7541900	7542200	hypo-methylation	-0.597625
1	7543000	7544500	hypo-methylation	-0.847352
1	7544900	7546100	hypo-methylation	-0.939804
1	7546200	7546700	hypo-methylation	-0.861255
1	7548000	7548500	hypo-methylation	-0.779777
1	7552900	7553200	hypo-methylation	-0.334183
1	7564600	7565500	hypo-methylation	-0.378699
1	7568400	7568900	hypo-methylation	-0.576324
1	7569900	7570200	hypo-methylation	-0.631533
1	7570600	7571100	hypo-methylation	-0.461252
1	7574600	7575100	hypo-methylation	-0.782015
1	7575400	7575900	hypo-methylation	-0.782918
1	7581800	7582300	hypo-methylation	-0.770193
1	7584400	7585000	hypo-methylation	-0.742464
1	7585800	7586200	hypo-methylation	-0.395817
1	7586800	7587300	hypo-methylation	-0.632575
1	7593900	7594300	hypo-methylation	-0.789983
1	7600100	7601300	hypo-methylation	-0.572117
1	7601500	7602000	hypo-methylation	-0.726017
1	7609200	7610000	hypo-methylation	-0.634346
1	7614900	7615200	hypo-methylation	-0.545616
1	7615500	7616900	hypo-methylation	-0.722082
1	7617600	7618000	hypo-methylation	-0.653806
1	7618600	7619000	hypo-methylation	-0.437738
1	7624700	7625200	hypo-methylation	-0.560827
1	7626100	7626600	hypo-methylation	-0.431469
1	7629800	7630200	hypo-methylation	-0.633911
1	7653800	7654200	hypo-methylation	-0.496942
1	7654500	7655300	hypo-methylation	-0.739953
1	7655500	7656000	hypo-methylation	-0.624142
1	7671400	7672400	hypo-methylation	-0.735275
1	7682700	7683200	hypo-methylation	-0.680733
1	7686300	7686600	hypo-methylation	-0.458604
1	7696700	7697200	hypo-methylation	-0.414199
1	7698700	7699700	hypo-methylation	-0.774919
1	7699800	7700300	hypo-methylation	-0.521375
1	7705000	7705300	hypo-methylation	-0.321604
1	7709100	7709400	hypo-methylation	-0.593746
1	7712800	7713600	hypo-methylation	-0.793973
1	7714100	7714600	hypo-methylation	-0.9192
1	7715100	7715500	hypo-methylation	-0.673016
1	7715700	7716400	hypo-methylation	-0.933521
1	7719300	7720000	hypo-methylation	-0.867827
1	7720700	7721000	hypo-methylation	-0.711232
1	7738200	7738800	hypo-methylation	-0.590453
1	7768600	7769000	hypo-methylation	-0.311438
1	7798200	7799200	hypo-methylation	-0.46092
1	7798200	7799200	hyper-methylation	0.370426
1	7800300	7801300	hypo-methylation	-0.731875
1	7811400	7813900	hypo-methylation	-0.776881
1	7815000	7815500	hypo-methylation	-0.452079
1	7818700	7819200	hypo-methylation	-0.584537
1	7822500	7822700	hypo-methylation	-0.341246
1	7839900	7840800	hypo-methylation	-0.830418
1	7843700	7844000	hypo-methylation	-0.282413
1	7844600	7845100	hypo-methylation	-0.598848
1	7846000	7846100	hypo-methylation	-0.28405
1	7853500	7854000	hypo-methylation	-0.535984
1	7859200	7859300	hypo-methylation	-0.404296
1	7887700	7888100	hypo-methylation	-0.714375
1	7888700	7890000	hypo-methylation	-0.738237
1	7890500	7891300	hypo-methylation	-0.710348
1	7898100	7898500	hypo-methylation	-0.407729
1	7907100	7907600	hypo-methylation	-0.509522
1	7908200	7908900	hypo-methylation	-0.441981
1	7914500	7915100	hypo-methylation	-0.84265
1	7923400	7923700	hypo-methylation	-0.4734
1	7965700	7966100	hypo-methylation	-0.390942
1	7976800	7977200	hypo-methylation	-0.529882
1	7979300	7979600	hypo-methylation	-0.644334
1	7983000	7983300	hypo-methylation	-0.41375
1	7983500	7984100	hypo-methylation	-0.50939
1	8042900	8043400	hyper-methylation	0.39679
1	8060000	8060500	hypo-methylation	-0.810832
1	8067100	8068000	hypo-methylation	-0.786067
1	8074000	8074800	hypo-methylation	-0.677268
1	8090000	8090500	hypo-methylation	-0.568666
1	8112600	8113300	hypo-methylation	-0.594756
1	8119600	8119900	hypo-methylation	-0.680275
1	8120300	8120600	hypo-methylation	-0.50295
1	8120800	8120900	hypo-methylation	-0.577571
1	8121000	8121300	hypo-methylation	-0.514291
1	8135700	8136400	hypo-methylation	-0.498496
1	8135700	8136400	hypo-methylation	-0.513387
1	8143600	8144000	hypo-methylation	-0.500213
1	8149500	8150000	hypo-methylation	-0.861665
1	8155800	8156500	hypo-methylation	-0.391728
1	8181200	8181500	hypo-methylation	-0.353903
1	8183100	8183800	hypo-methylation	-0.551261
1	8183100	8183800	hyper-methylation	0.544787
1	8190400	8190600	hypo-methylation	-0.571174
1	8195000	8196000	hypo-methylation	-0.538725
1	8204600	8205300	hypo-methylation	-0.711115
1	8214000	8214500	hypo-methylation	-0.462442
1	8270200	8270700	hypo-methylation	-0.85337
1	8270900	8271300	hypo-methylation	-0.630881
1	8271800	8272500	hypo-methylation	-0.820221
1	8293700	8294000	hypo-methylation	-0.607191
1	8295700	8295900	hyper-methylation	0.294733
1	8297100	8297300	hypo-methylation	-0.303665
1	8298500	8299000	hypo-methylation	-0.805635
1	8309400	8310000	hypo-methylation	-0.408998
1	8335800	8336300	hypo-methylation	-0.572342
1	8337100	8337300	hypo-methylation	-0.337917
1	8341900	8342200	hypo-methylation	-0.304522
1	8345900	8346400	hypo-methylation	-0.431506
1	8347400	8347700	hypo-methylation	-0.379437
1	8348700	8349100	hypo-methylation	-0.430358
1	8351200	8351700	hypo-methylation	-0.464909
1	8368000	8368100	hypo-methylation	-0.524984
1	8374100	8374600	hypo-methylation	-0.783198
1	8375700	8375900	hypo-methylation	-0.236917
1	8377400	8378200	hypo-methylation	-0.82982
1	8378600	8379000	hypo-methylation	-0.666122
1	8382700	8383600	hypo-methylation	-0.498093
1	8390700	8391500	hypo-methylation	-0.412869
1	8390700	8391500	hyper-methylation	0.348616
1	8408900	8409600	hypo-methylation	-0.881406
1	8410400	8410600	hypo-methylation	-0.297924
1	8413300	8413700	hypo-methylation	-0.741952
1	8415900	8417200	hypo-methylation	-0.908436
1	8417300	8417900	hypo-methylation	-0.983988
1	8420200	8420700	hypo-methylation	-0.862392
1	8427000	8427300	hypo-methylation	-0.365888
1	8427500	8427800	hypo-methylation	-0.399188
1	8431100	8431600	hypo-methylation	-0.47111
1	8435800	8436100	hypo-methylation	-0.410557
1	8436300	8436600	hypo-methylation	-0.584599
1	8438600	8439100	hypo-methylation	-0.302979
1	8442300	8442900	hypo-methylation	-0.492098
1	8463600	8464100	hypo-methylation	-0.642628
1	8464800	8465600	hypo-methylation	-0.823173
1	8492200	8492600	hypo-methylation	-0.551558
1	8502500	8502700	hypo-methylation	-0.268006
1	8561000	8561300	hyper-methylation	0.457035
1	8561700	8562200	hypo-methylation	-0.472048
1	8570900	8571500	hyper-methylation	0.359925
1	8579500	8580100	hypo-methylation	-0.42764
1	8580600	8581400	hypo-methylation	-0.657501
1	8587400	8587500	hypo-methylation	-0.887216
1	8592000	8592200	hypo-methylation	-0.28865
1	8599900	8600300	hypo-methylation	-0.52591
1	8600400	8600600	hypo-methylation	-0.626691
1	8601200	8602000	hypo-methylation	-0.754915
1	8602100	8603300	hypo-methylation	-0.753775
1	8603600	8604000	hypo-methylation	-0.74655
1	8612600	8613800	hypo-methylation	-0.773316
1	8626700	8627000	hypo-methylation	-0.501138
1	8627100	8627600	hypo-methylation	-0.548805
1	8629900	8630500	hypo-methylation	-0.900344
1	8634000	8634800	hypo-methylation	-0.850861
1	8634900	8636000	hypo-methylation	-0.821901
1	8662900	8663600	hypo-methylation	-0.904288
1	8675600	8675800	hypo-methylation	-0.390637
1	8676000	8676200	hypo-methylation	-0.391831
1	8683900	8684500	hypo-methylation	-0.533585
1	8686400	8686800	hypo-methylation	-0.759238
1	8694200	8694600	hypo-methylation	-0.378912
1	8706000	8706600	hypo-methylation	-0.740344
1	8707200	8707700	hypo-methylation	-0.620314
1	8724200	8724400	hypo-methylation	-0.334542
1	8731200	8731700	hypo-methylation	-0.503929
1	8733300	8733800	hypo-methylation	-0.383298
1	8756500	8757100	hypo-methylation	-0.463109
1	8760700	8761200	hypo-methylation	-0.788204
1	8762100	8762700	hypo-methylation	-0.927695
1	8764900	8765200	hypo-methylation	-0.584555
1	8765800	8766300	hypo-methylation	-0.40489
1	8773600	8774400	hypo-methylation	-0.808739
1	8781700	8781900	hypo-methylation	-0.629275
1	8782300	8782800	hypo-methylation	-0.3523
1	8787600	8788200	hypo-methylation	-0.4443
1	8791400	8791800	hypo-methylation	-0.593292
1	8795300	8795900	hypo-methylation	-0.780606
1	8816100	8816800	hypo-methylation	-0.59746
1	8830200	8830900	hypo-methylation	-0.655158
1	8850800	8850900	hypo-methylation	-0.3169
1	8851600	8852100	hypo-methylation	-0.486956
1	8852300	8853100	hypo-methylation	-0.602206
1	8853700	8854300	hypo-methylation	-0.559163
1	8876400	8876700	hypo-methylation	-0.307525
1	8878300	8878800	hypo-methylation	-0.667671
1	8879200	8879600	hypo-methylation	-0.487231
1	9012200	9012900	hypo-methylation	-0.792718
1	9061300	9061600	hypo-methylation	-0.276998
1	9087400	9087900	hypo-methylation	-0.853833
1	9136000	9136500	hypo-methylation	-0.844059
1	9259900	9260300	hypo-methylation	-0.892706
1	9385700	9386200	hypo-methylation	-0.342878
1	9388800	9389100	hypo-methylation	-0.410058
1	9389200	9389400	hypo-methylation	-0.356854
1	9394700	9395400	hypo-methylation	-0.625904
1	9398300	9398700	hypo-methylation	-0.928679
1	9398900	9399200	hypo-methylation	-0.424075
1	9400600	9401200	hypo-methylation	-0.491032
1	9400600	9401200	hypo-methylation	-0.507273
1	9401600	9402100	hypo-methylation	-0.689653
1	9408200	9408900	hypo-methylation	-0.530419
1	9418500	9418800	hypo-methylation	-0.416117
1	9425700	9426100	hypo-methylation	-0.811569
1	9434200	9435100	hypo-methylation	-0.78954
1	9437500	9437900	hypo-methylation	-0.383373
1	9442700	9443200	hypo-methylation	-0.910333
1	9457400	9458100	hypo-methylation	-0.682224
1	9472500	9473100	hypo-methylation	-0.82053
1	9473300	9473800	hypo-methylation	-0.570135
1	9477200	9477500	hypo-methylation	-0.436821
1	9479200	9479700	hypo-methylation	-0.687179
1	9479900	9480700	hypo-methylation	-0.448115
1	9484500	9485000	hypo-methylation	-0.484052
1	9485400	9487300	hypo-methylation	-0.740153
1	9487800	9488300	hypo-methylation	-0.713361
1	9494300	9494800	hypo-methylation	-0.450377
1	9518200	9519000	hypo-methylation	-0.819948
1	9547000	9547200	hypo-methylation	-0.327775
1	9549700	9550300	hypo-methylation	-0.429244
1	9550800	9551000	hypo-methylation	-0.465201
1	9551100	9551300	hypo-methylation	-0.404663
1	9552600	9553000	hypo-methylation	-0.392284
1	9553500	9554000	hypo-methylation	-0.905272
1	9554200	9555200	hypo-methylation	-0.844463
1	9559200	9559500	hypo-methylation	-0.3326
1	9561300	9561500	hypo-methylation	-0.378792
1	9566200	9566700	hypo-methylation	-0.467878
1	9569800	9571600	hypo-methylation	-0.848777
1	9572700	9573100	hypo-methylation	-0.553203
1	9583800	9584200	hypo-methylation	-0.621846
1	9598700	9599500	hypo-methylation	-0.641876
1	9608600	9609100	hypo-methylation	-0.588183
1	9626900	9627000	hypo-methylation	-0.8075
1	9627400	9627600	hypo-methylation	-0.675542
1	9633100	9633500	hypo-methylation	-0.78445
1	9640700	9642000	hypo-methylation	-0.8924
1	9642400	9642700	hypo-methylation	-0.335191
1	9646000	9646300	hypo-methylation	-0.407448
1	9649600	9650000	hypo-methylation	-0.431085
1	9661900	9662500	hypo-methylation	-0.564222
1	9663000	9663600	hypo-methylation	-0.518189
1	9663800	9665000	hypo-methylation	-0.741257
1	9666400	9667500	hypo-methylation	-0.88622
1	9667800	9668200	hypo-methylation	-0.915179
1	9671400	9672300	hypo-methylation	-0.815766
1	9672500	9673000	hypo-methylation	-0.976056
1	9675800	9676900	hypo-methylation	-0.800401
1	9677400	9678200	hypo-methylation	-0.792075
1	9678300	9678900	hypo-methylation	-0.601365
1	9686600	9687700	hypo-methylation	-0.823012
1	9700600	9701000	hypo-methylation	-0.447616
1	9701400	9701900	hypo-methylation	-0.763625
1	9710100	9710900	hypo-methylation	-0.76149
1	9718300	9718400	hyper-methylation	0.405725
1	9718500	9718600	hyper-methylation	0.412125
1	9725900	9726600	hypo-methylation	-0.737836
1	9763500	9764800	hypo-methylation	-0.649444
1	9766100	9766900	hypo-methylation	-0.623933
1	9769300	9769600	hypo-methylation	-0.310579
1	9774100	9775200	hypo-methylation	-0.684248
1	9776700	9777300	hypo-methylation	-0.594877
1	9779700	9780000	hypo-methylation	-0.331173
1	9782600	9783000	hypo-methylation	-0.602427
1	9783200	9783700	hypo-methylation	-0.590958
1	9784500	9785100	hypo-methylation	-0.754687
1	9798600	9799000	hypo-methylation	-0.574825
1	9801900	9803200	hypo-methylation	-0.94074
1	9805900	9806400	hypo-methylation	-0.965558
1	9807000	9807900	hypo-methylation	-0.726579
1	9808300	9808800	hypo-methylation	-0.876589
1	9815000	9815300	hypo-methylation	-0.442576
1	9820300	9820700	hypo-methylation	-0.891487
1	9823400	9824000	hypo-methylation	-0.925704
1	9829300	9831100	hypo-methylation	-0.524506
1	9831900	9832500	hypo-methylation	-0.599338
1	9849600	9849800	hypo-methylation	-0.302594
1	9855700	9856400	hypo-methylation	-0.709166
1	9857800	9858600	hypo-methylation	-0.408864
1	9862600	9862800	hypo-methylation	-0.308708
1	9870800	9871300	hypo-methylation	-0.592135
1	9871400	9871900	hypo-methylation	-0.539427
1	9873200	9873600	hypo-methylation	-0.41559
1	9875300	9875800	hypo-methylation	-0.491214
1	9877200	9878000	hypo-methylation	-0.71712
1	9878900	9879800	hypo-methylation	-0.810471
1	9880000	9880100	hypo-methylation	-0.898438
1	9880200	9881000	hypo-methylation	-0.934679
1	9881600	9882000	hypo-methylation	-0.46785
1	9887200	9887700	hypo-methylation	-0.602267
1	9896200	9896900	hypo-methylation	-0.738401
1	9898000	9898700	hypo-methylation	-0.718317
1	9907600	9907900	hypo-methylation	-0.405032
1	9907600	9907900	hypo-methylation	-0.431128
1	9908200	9908500	hypo-methylation	-0.405686
1	9908200	9908500	hypo-methylation	-0.431782
1	9911700	9912300	hypo-methylation	-0.421753
1	9917600	9918200	hypo-methylation	-0.727908
1	9920000	9921000	hypo-methylation	-0.886513
1	9923700	9924000	hypo-methylation	-0.388638
1	9924400	9925100	hypo-methylation	-0.870472
1	9926000	9926300	hypo-methylation	-0.323022
1	9927200	9928100	hypo-methylation	-0.680109
1	9930600	9931400	hypo-methylation	-0.737268
1	9933900	9934400	hypo-methylation	-0.954025
1	9974400	9974500	hypo-methylation	-0.310808
1	9975100	9976400	hypo-methylation	-0.550218
1	9975100	9976400	hypo-methylation	-0.576609
1	9975100	9976400	hypo-methylation	-0.62077
1	9975100	9976400	hypo-methylation	-0.647161
1	9975100	9976400	hyper-methylation	0.443675
1	9978300	9978600	hypo-methylation	-0.370398
1	9978700	9979200	hypo-methylation	-0.391192
1	9988500	9988800	hypo-methylation	-0.530729
1	10015800	10016100	hypo-methylation	-0.336171
1	10018500	10019100	hypo-methylation	-0.48183
1	10045200	10045700	hypo-methylation	-0.461758
1	10054500	10055000	hypo-methylation	-0.296875
1	10055600	10056500	hypo-methylation	-0.681853
1	10104700	10105300	hypo-methylation	-0.786389
1	10106000	10106500	hypo-methylation	-0.723325
1	10107700	10108200	hypo-methylation	-0.348458
1	10126400	10126900	hypo-methylation	-0.40575
1	10128900	10129400	hypo-methylation	-0.829346
1	10130600	10130900	hypo-methylation	-0.500633
1	10134700	10135300	hypo-methylation	-0.75976
1	10146800	10147300	hypo-methylation	-0.485796
1	10158900	10159100	hypo-methylation	-0.31299
1	10160700	10160800	hypo-methylation	-0.300412
1	10163100	10163500	hypo-methylation	-0.712438
1	10192800	10193400	hypo-methylation	-0.456875
1	10199500	10200200	hypo-methylation	-0.437065
1	10223600	10225300	hypo-methylation	-0.668378
1	10227200	10227700	hypo-methylation	-0.899652
1	10227800	10228700	hypo-methylation	-0.888429
1	10230000	10230300	hypo-methylation	-0.551458
1	10238000	10238400	hypo-methylation	-0.653153
1	10238700	10239300	hypo-methylation	-0.557611
1	10242800	10244100	hypo-methylation	-0.693194
1	10266300	10266800	hypo-methylation	-0.900962
1	10284800	10285300	hypo-methylation	-0.862627
1	10286900	10287300	hyper-methylation	0.318675
1	10290600	10291000	hypo-methylation	-0.442698
1	10308200	10308400	hypo-methylation	-0.374271
1	10316800	10317300	hypo-methylation	-0.615887
1	10317600	10318300	hypo-methylation	-0.650064
1	10329400	10330200	hypo-methylation	-0.370762
1	10335300	10336200	hypo-methylation	-0.450508
1	10341500	10342100	hypo-methylation	-0.669989
1	10343700	10344300	hypo-methylation	-0.53225
1	10350400	10351200	hypo-methylation	-0.788812
1	10352800	10353700	hypo-methylation	-0.913577
1	10354400	10355700	hypo-methylation	-0.879551
1	10356000	10356500	hypo-methylation	-0.663765
1	10358400	10358600	hypo-methylation	-0.340765
1	10361200	10361900	hypo-methylation	-0.556385
1	10362300	10362600	hypo-methylation	-0.489092
1	10362900	10363400	hypo-methylation	-0.867733
1	10363500	10363900	hypo-methylation	-0.878963
1	10364000	10364500	hypo-methylation	-0.715777
1	10364700	10365100	hypo-methylation	-0.512844
1	10367700	10368000	hypo-methylation	-0.448862
1	10371800	10373700	hypo-methylation	-0.740731
1	10374200	10374700	hypo-methylation	-0.505432
1	10375900	10376400	hypo-methylation	-0.463236
1	10375900	10376400	hypo-methylation	-0.49372
1	10379700	10380200	hypo-methylation	-0.622165
1	10401000	10401700	hypo-methylation	-0.599237
1	10431500	10431600	hypo-methylation	-0.315191
1	10434700	10435000	hypo-methylation	-0.364317
1	10468500	10469000	hypo-methylation	-0.464602
1	10475100	10475900	hypo-methylation	-0.666717
1	10476300	10477500	hypo-methylation	-0.639623
1	10480000	10480300	hypo-methylation	-0.36974
1	10484400	10485100	hypo-methylation	-0.793543
1	10487200	10487500	hypo-methylation	-0.416175
1	10491500	10491800	hypo-methylation	-0.397967
1	10501000	10501600	hypo-methylation	-0.493239
1	10502900	10503400	hypo-methylation	-0.586083
1	10503800	10504300	hypo-methylation	-0.439365
1	10506100	10506600	hypo-methylation	-0.627498
1	10507100	10507500	hypo-methylation	-0.839298
1	10537000	10537800	hypo-methylation	-0.412183
1	10551200	10551700	hypo-methylation	-0.618464
1	10553300	10553700	hypo-methylation	-0.326543
1	10555500	10555800	hypo-methylation	-0.390996
1	10566600	10567400	hypo-methylation	-0.772497
1	10581900	10582000	hypo-methylation	-0.433819
1	10582700	10583500	hypo-methylation	-0.643021
1	10584800	10585100	hypo-methylation	-0.415631
1	10588900	10589500	hypo-methylation	-0.524085
1	10595200	10595400	hypo-methylation	-0.367267
1	10603000	10603500	hypo-methylation	-0.375904
1	10612400	10613000	hypo-methylation	-0.514707
1	10615700	10616000	hypo-methylation	-0.459267
1	10616300	10618900	hypo-methylation	-0.866627
1	10619500	10619800	hypo-methylation	-0.656208
1	10621900	10622600	hypo-methylation	-0.476424
1	10629400	10630200	hypo-methylation	-0.876737
1	10635300	10635500	hypo-methylation	-0.546566
1	10635700	10636300	hypo-methylation	-0.618831
1	10649200	10649900	hypo-methylation	-0.448896
1	10649200	10649900	hypo-methylation	-0.462254
1	10649200	10649900	hypo-methylation	-0.51357
1	10649200	10649900	hypo-methylation	-0.526929
1	10649200	10649900	hyper-methylation	0.5202
1	10652000	10652900	hypo-methylation	-0.60775
1	10661200	10661700	hypo-methylation	-0.685575
1	10662400	10662900	hypo-methylation	-0.547588
1	10669700	10670300	hypo-methylation	-0.503162
1	10672900	10673500	hypo-methylation	-0.619591
1	10710300	10710500	hypo-methylation	-0.543742
1	10715000	10715700	hypo-methylation	-0.484406
1	10716300	10716700	hypo-methylation	-0.601634
1	10751600	10752200	hypo-methylation	-0.512532
1	10753300	10753600	hypo-methylation	-0.391286
1	10764000	10764500	hypo-methylation	-0.364613
1	10823500	10823800	hypo-methylation	-0.495706
1	10826000	10826600	hypo-methylation	-0.7245
1	10835200	10835700	hypo-methylation	-0.557849
1	10838000	10838300	hypo-methylation	-0.531767
1	10841000	10841400	hypo-methylation	-0.361057
1	10870700	10870900	hypo-methylation	-0.382018
1	10886900	10887400	hypo-methylation	-0.585267
1	10888500	10888800	hypo-methylation	-0.330753
1	10906800	10907200	hypo-methylation	-0.580941
1	10916200	10917400	hypo-methylation	-0.717112
1	10918300	10918900	hyper-methylation	0.315837
1	10925200	10925800	hypo-methylation	-0.672979
1	10937500	10938700	hypo-methylation	-0.636107
1	10940200	10940700	hypo-methylation	-0.484829
1	10945500	10946100	hypo-methylation	-0.771094
1	10947600	10947900	hyper-methylation	0.2595
1	10959000	10959800	hypo-methylation	-0.770938
1	10963600	10964100	hypo-methylation	-0.634925
1	10967100	10967600	hypo-methylation	-0.881292
1	10981800	10982300	hypo-methylation	-0.80835
1	10990000	10991000	hypo-methylation	-0.78437
1	10992400	10993400	hypo-methylation	-0.927793
1	10994000	10995000	hypo-methylation	-0.851515
1	11014600	11015400	hypo-methylation	-0.479272
1	11016400	11016700	hypo-methylation	-0.302841
1	11018500	11019000	hypo-methylation	-0.39524
1	11019200	11019300	hypo-methylation	-0.459453
1	11019700	11020200	hypo-methylation	-0.755487
1	11020800	11021100	hypo-methylation	-0.590021
1	11021700	11022000	hypo-methylation	-0.312912
1	11022400	11023200	hypo-methylation	-0.515674
1	11023700	11024000	hypo-methylation	-0.458065
1	11030900	11032100	hypo-methylation	-0.87913
1	11032600	11033100	hypo-methylation	-0.956306
1	11034000	11035000	hypo-methylation	-0.932057
1	11035200	11035600	hypo-methylation	-0.876979
1	11037600	11038100	hypo-methylation	-0.733565
1	11039100	11039400	hypo-methylation	-0.385983
1	11042600	11042900	hypo-methylation	-0.2938
1	11043400	11044100	hypo-methylation	-0.823282
1	11048300	11048600	hypo-methylation	-0.317757
1	11051000	11051600	hypo-methylation	-0.609924
1	11051800	11052100	hypo-methylation	-0.517477
1	11053800	11054500	hypo-methylation	-0.61727
1	11069600	11070000	hypo-methylation	-0.399079
1	11157000	11157100	hypo-methylation	-0.333502
1	11171300	11171800	hypo-methylation	-0.662333
1	11186500	11187100	hypo-methylation	-0.722164
1	11193200	11193700	hypo-methylation	-0.7243
1	11230200	11230600	hypo-methylation	-0.647602
1	11268200	11268300	hypo-methylation	-0.300887
1	11278300	11279200	hypo-methylation	-0.7159
1	11340600	11341000	hypo-methylation	-0.512194
1	11421100	11421600	hypo-methylation	-0.502815
1	11423000	11423300	hypo-methylation	-0.486959
1	11437200	11437700	hypo-methylation	-0.821558
1	11471000	11471200	hypo-methylation	-0.360296
1	11472100	11472400	hypo-methylation	-0.340342
1	11472700	11473100	hypo-methylation	-0.399917
1	11473900	11475100	hypo-methylation	-0.650244
1	11476200	11476800	hypo-methylation	-0.588369
1	11499100	11499400	hypo-methylation	-0.506703
1	11505600	11505900	hypo-methylation	-0.254442
1	11513000	11513700	hypo-methylation	-0.60422
1	11513900	11514800	hypo-methylation	-0.705267
1	11530300	11530700	hypo-methylation	-0.87721
1	11539800	11540500	hypo-methylation	-0.739814
1	11546600	11547400	hypo-methylation	-0.764225
1	11548200	11548500	hypo-methylation	-0.284037
1	11572200	11572800	hypo-methylation	-0.52568
1	11572900	11573500	hypo-methylation	-0.464926
1	11582700	11583300	hypo-methylation	-0.4626
1	11587400	11588700	hypo-methylation	-0.648475
1	11588800	11589100	hyper-methylation	0.674544
1	11596400	11597200	hypo-methylation	-0.406698
1	11608900	11609400	hypo-methylation	-0.485675
1	11610300	11610800	hypo-methylation	-0.354143
1	11613700	11613900	hypo-methylation	-0.226325
1	11615300	11616000	hypo-methylation	-0.510184
1	11627000	11627400	hypo-methylation	-0.668847
1	11627900	11628300	hypo-methylation	-0.800744
1	11628600	11628800	hypo-methylation	-0.714907
1	11629000	11629400	hypo-methylation	-0.717067
1	11633000	11633400	hypo-methylation	-0.957458
1	11633600	11634100	hypo-methylation	-0.699788
1	11634900	11635900	hypo-methylation	-0.948786
1	11642900	11643400	hypo-methylation	-0.363548
1	11644200	11644700	hypo-methylation	-0.303025
1	11654600	11655200	hypo-methylation	-0.606425
1	11692000	11692500	hypo-methylation	-0.560142
1	11694900	11695500	hypo-methylation	-0.59012
1	11701600	11702000	hypo-methylation	-0.29593
1	11708000	11708100	hypo-methylation	-0.563659
1	11709300	11709700	hypo-methylation	-0.83765
1	11710100	11710900	hypo-methylation	-0.302583
1	11727200	11728300	hypo-methylation	-0.497381
1	11732100	11732600	hypo-methylation	-0.577697
1	11732100	11732600	hypo-methylation	-0.736368
1	11732900	11733400	hypo-methylation	-0.543383
1	11732900	11733400	hypo-methylation	-0.702054
1	11736400	11736900	hypo-methylation	-0.413443
1	11743600	11744200	hypo-methylation	-0.39452
1	11748200	11748700	hypo-methylation	-0.384008
1	11773100	11773800	hypo-methylation	-0.511869
1	11777600	11778300	hypo-methylation	-0.706591
1	11780900	11781600	hypo-methylation	-0.546148
1	11804400	11804700	hypo-methylation	-0.615887
1	11805100	11806200	hypo-methylation	-0.85041
1	11807300	11808000	hypo-methylation	-0.42961
1	11807300	11808000	hyper-methylation	0.424391
1	11824700	11825800	hypo-methylation	-0.6735
1	11827100	11827700	hypo-methylation	-0.75296
1	11827800	11828400	hypo-methylation	-0.705837
1	11829000	11829800	hypo-methylation	-0.72537
1	11831500	11831900	hypo-methylation	-0.386925
1	11849500	11850000	hypo-methylation	-0.639367
1	11854400	11855500	hypo-methylation	-0.623873
1	11863100	11863500	hypo-methylation	-0.498927
1	11866700	11866800	hypo-methylation	-0.397563
1	11867200	11867600	hypo-methylation	-0.453917
1	11874500	11874800	hypo-methylation	-0.347742
1	11874500	11874800	hypo-methylation	-0.350967
1	11884800	11885400	hypo-methylation	-0.594298
1	11896900	11897300	hypo-methylation	-0.424719
1	11908400	11909100	hypo-methylation	-0.873465
1	11909200	11910200	hypo-methylation	-0.785337
1	11911900	11912400	hypo-methylation	-0.586527
1	11914100	11914800	hypo-methylation	-0.543203
1	11915000	11915300	hypo-methylation	-0.527737
1	11940100	11940300	hypo-methylation	-0.432847
1	11940400	11940700	hypo-methylation	-0.332775
1	11952600	11952900	hypo-methylation	-0.354521
1	11953700	11954000	hypo-methylation	-0.307663
1	11954300	11954700	hypo-methylation	-0.460834
1	11957100	11958100	hypo-methylation	-0.597516
1	11960400	11961100	hypo-methylation	-0.874172
1	11961300	11961800	hypo-methylation	-0.921938
1	11962000	11962500	hypo-methylation	-0.900958
1	11963100	11963400	hypo-methylation	-0.925875
1	11971400	11971900	hypo-methylation	-0.324307
1	11972500	11972800	hypo-methylation	-0.395941
1	11975000	11975900	hypo-methylation	-0.878261
1	11988900	11989700	hypo-methylation	-0.926373
1	11994500	11995200	hypo-methylation	-0.652912
1	11995400	11995700	hypo-methylation	-0.404407
1	12060000	12060100	hypo-methylation	-0.40703
1	12070300	12071300	hypo-methylation	-0.663773
1	12071600	12072400	hypo-methylation	-0.650032
1	12073500	12074000	hypo-methylation	-0.695939
1	12076700	12077300	hypo-methylation	-0.488267
1	12077500	12078300	hypo-methylation	-0.637745
1	12089500	12090300	hypo-methylation	-0.82587
1	12109600	12109900	hypo-methylation	-0.44447
1	12119700	12120200	hypo-methylation	-0.590256
1	12125200	12125700	hypo-methylation	-0.493719
1	12125900	12126300	hypo-methylation	-0.500092
1	12127800	12129100	hypo-methylation	-0.809241
1	12131900	12132400	hypo-methylation	-0.619098
1	12143500	12143700	hypo-methylation	-0.322337
1	12143900	12144000	hypo-methylation	-0.272616
1	12146200	12146500	hypo-methylation	-0.583
1	12149100	12149700	hypo-methylation	-0.501409
1	12152400	12153100	hypo-methylation	-0.635231
1	12154900	12156000	hypo-methylation	-0.657147
1	12159100	12160200	hypo-methylation	-0.856828
1	12162300	12162900	hypo-methylation	-0.86275
1	12163300	12164700	hypo-methylation	-0.616187
1	12172600	12172900	hypo-methylation	-0.43045
1	12176900	12177500	hypo-methylation	-0.425917
1	12176900	12177500	hyper-methylation	0.2492
1	12186200	12187100	hypo-methylation	-0.498632
1	12193500	12194000	hypo-methylation	-0.618861
1	12201300	12201600	hypo-methylation	-0.498749
1	12206400	12206700	hypo-methylation	-0.636863
1	12206900	12208200	hypo-methylation	-0.681302
1	12211100	12211900	hypo-methylation	-0.782444
1	12212400	12212800	hypo-methylation	-0.342869
1	12219400	12220300	hypo-methylation	-0.543273
1	12223200	12223500	hypo-methylation	-0.684713
1	12227600	12228000	hypo-methylation	-0.371949
1	12229900	12230500	hypo-methylation	-0.598143
1	12230600	12231100	hypo-methylation	-0.479542
1	12234100	12234800	hypo-methylation	-0.798458
1	12247000	12247500	hypo-methylation	-0.35575
1	12263200	12264400	hypo-methylation	-0.897394
1	12283800	12285100	hypo-methylation	-0.82602
1	12296600	12296900	hypo-methylation	-0.368178
1	12299000	12299200	hypo-methylation	-0.39575
1	12300600	12300900	hypo-methylation	-0.31935
1	12314300	12315200	hypo-methylation	-0.65299
1	12322200	12322400	hyper-methylation	0.263825
1	12337100	12337500	hypo-methylation	-0.453941
1	12337600	12338100	hypo-methylation	-0.401056
1	12339100	12339600	hypo-methylation	-0.718612
1	12339800	12340700	hypo-methylation	-0.823222
1	12341100	12341600	hypo-methylation	-0.578491
1	12343100	12343600	hypo-methylation	-0.587021
1	12349200	12349600	hypo-methylation	-0.627408
1	12356400	12356900	hypo-methylation	-0.275385
1	12361000	12361200	hypo-methylation	-0.469894
1	12362800	12363700	hypo-methylation	-0.696503
1	12373800	12374300	hypo-methylation	-0.508975
1	12393100	12393800	hypo-methylation	-0.898351
1	12395100	12395400	hypo-methylation	-0.69499
1	12398300	12399200	hypo-methylation	-0.871506
1	12405100	12405700	hypo-methylation	-0.524037
1	12504000	12504600	hypo-methylation	-0.459556
1	12505000	12505400	hypo-methylation	-0.526039
1	12511800	12512300	hypo-methylation	-0.679308
1	12548300	12548600	hypo-methylation	-0.600954
1	12570300	12570600	hypo-methylation	-0.717755
1	12571000	12571600	hypo-methylation	-0.713533
1	12585300	12585700	hypo-methylation	-0.505208
1	12611800	12613000	hypo-methylation	-0.658527
1	12613100	12613800	hypo-methylation	-0.557283
1	12647600	12648200	hypo-methylation	-0.815241
1	12648700	12649000	hypo-methylation	-0.376796
1	12652100	12652600	hypo-methylation	-0.853387
1	12653700	12654200	hypo-methylation	-0.409704
1	12666300	12666900	hypo-methylation	-0.646786
1	12670700	12671000	hypo-methylation	-0.717742
1	12674300	12674800	hypo-methylation	-0.642045
1	12675000	12675200	hypo-methylation	-0.584381
1	12676800	12677200	hypo-methylation	-0.320471
1	12680100	12681300	hypo-methylation	-0.858836
1	12686800	12687300	hypo-methylation	-0.70226
1	12691300	12691900	hypo-methylation	-0.368764
1	12693600	12693900	hypo-methylation	-0.332626
1	12711100	12712500	hypo-methylation	-0.670649
1	12732900	12733500	hypo-methylation	-0.489571
1	12738000	12738500	hypo-methylation	-0.615692
1	12744000	12744500	hypo-methylation	-0.865803
1	12750200	12751500	hypo-methylation	-0.792285
1	12755900	12756700	hypo-methylation	-0.401436
1	12767000	12768000	hypo-methylation	-0.503069
1	12778300	12778700	hypo-methylation	-0.538669
1	12859800	12860200	hypo-methylation	-0.394379
1	12876900	12877900	hypo-methylation	-0.822253
1	12878800	12879100	hypo-methylation	-0.473342
1	12880900	12881300	hypo-methylation	-0.399633
1	12883400	12883700	hypo-methylation	-0.512658
1	12883900	12884500	hypo-methylation	-0.660652
1	12886000	12886100	hypo-methylation	-0.276809
1	12893000	12893300	hypo-methylation	-0.419172
1	12893400	12893900	hypo-methylation	-0.502136
1	12906800	12907300	hypo-methylation	-0.422747
1	12907500	12908200	hypo-methylation	-0.807778
1	12908400	12908900	hypo-methylation	-0.784573
1	12911600	12913400	hypo-methylation	-0.842664
1	12919700	12920500	hypo-methylation	-0.605817
1	12927200	12928200	hypo-methylation	-0.4792
1	12931700	12932200	hypo-methylation	-0.591491
1	12934400	12934900	hypo-methylation	-0.638281
1	12937500	12937800	hypo-methylation	-0.41735
1	12941900	12942100	hypo-methylation	-0.422366
1	12942400	12942600	hyper-methylation	0.2858
1	12976600	12976700	hypo-methylation	-0.272254
1	13123100	13123600	hypo-methylation	-0.658537
1	13134800	13135600	hypo-methylation	-0.621256
1	13143200	13143700	hypo-methylation	-0.711475
1	13151500	13152000	hypo-methylation	-0.36858
1	13199600	13200400	hypo-methylation	-0.634737
1	13203200	13203700	hypo-methylation	-0.451681
1	13206400	13207100	hypo-methylation	-0.758538
1	13207400	13207700	hypo-methylation	-0.44707
1	13209000	13209300	hypo-methylation	-0.461459
1	13210800	13211400	hypo-methylation	-0.541107
1	13211600	13211800	hypo-methylation	-0.482432
1	13214800	13215400	hypo-methylation	-0.776787
1	13216100	13216900	hypo-methylation	-0.666559
1	13217600	13218100	hypo-methylation	-0.863878
1	13218200	13219100	hypo-methylation	-0.857403
1	13236000	13237100	hypo-methylation	-0.540774
1	13242400	13242500	hypo-methylation	-0.362513
1	13243400	13243900	hypo-methylation	-0.642422
1	13249300	13250000	hypo-methylation	-0.738688
1	13253500	13254500	hypo-methylation	-0.446005
1	13262500	13263700	hypo-methylation	-0.915232
1	13263800	13264600	hypo-methylation	-0.926094
1	13266600	13267200	hypo-methylation	-0.39043
1	13268300	13269900	hypo-methylation	-0.675106
1	13270600	13271000	hypo-methylation	-0.597758
1	13271100	13271800	hypo-methylation	-0.67778
1	13279000	13279100	hypo-methylation	-0.709307
1	13279200	13280400	hypo-methylation	-0.874798
1	13282000	13282200	hypo-methylation	-0.513629
1	13282800	13283300	hypo-methylation	-0.341277
1	13285100	13286200	hypo-methylation	-0.868402
1	13287100	13287900	hypo-methylation	-0.63185
1	13288900	13289300	hypo-methylation	-0.552638
1	13289400	13289600	hypo-methylation	-0.678963
1	13289900	13291000	hypo-methylation	-0.847059
1	13297900	13298900	hypo-methylation	-0.810404
1	13306100	13307200	hypo-methylation	-0.893927
1	13307800	13308100	hypo-methylation	-0.480606
1	13308600	13309000	hypo-methylation	-0.587735
1	13309100	13309600	hypo-methylation	-0.667483
1	13315300	13315800	hypo-methylation	-0.623598
1	13322400	13322900	hypo-methylation	-0.562674
1	13332800	13333100	hypo-methylation	-0.389838
1	13334200	13334800	hypo-methylation	-0.410246
1	13339100	13339300	hypo-methylation	-0.356229
1	13347300	13347600	hypo-methylation	-0.325325
1	13351100	13351600	hypo-methylation	-0.368561
1	13354300	13354800	hypo-methylation	-0.724323
1	13357900	13358400	hypo-methylation	-0.471822
1	13362200	13362500	hypo-methylation	-0.271621
1	13379200	13379500	hypo-methylation	-0.391269
1	13379200	13379500	hypo-methylation	-0.460944
1	13379800	13380700	hypo-methylation	-0.663797
1	13379800	13380700	hypo-methylation	-0.733472
1	13384700	13385400	hypo-methylation	-0.403065
1	13385800	13386300	hypo-methylation	-0.386814
1	13387800	13389400	hypo-methylation	-0.773082
1	13406000	13406500	hypo-methylation	-0.676367
1	13440400	13440700	hypo-methylation	-0.508325
1	13441200	13442300	hypo-methylation	-0.810771
1	13455500	13456000	hypo-methylation	-0.698041
1	13484100	13485700	hypo-methylation	-0.714923
1	13509200	13509300	hypo-methylation	-0.27685
1	13513700	13515000	hypo-methylation	-0.86792
1	13517800	13518600	hypo-methylation	-0.598039
1	13520500	13520900	hypo-methylation	-0.382429
1	13528100	13529200	hypo-methylation	-0.726636
1	13550100	13550200	hypo-methylation	-0.316276
1	13550900	13551200	hypo-methylation	-0.549275
1	13552500	13553600	hypo-methylation	-0.506767
1	13552500	13553600	hypo-methylation	-0.513767
1	13552500	13553600	hypo-methylation	-0.521691
1	13552500	13553600	hypo-methylation	-0.528691
1	13552500	13553600	hyper-methylation	0.448842
1	13570000	13570500	hypo-methylation	-0.480571
1	13583200	13583700	hypo-methylation	-0.483108
1	13585300	13586300	hypo-methylation	-0.696236
1	13587600	13588000	hypo-methylation	-0.447051
1	13588400	13589100	hypo-methylation	-0.373754
1	13588400	13589100	hyper-methylation	0.348675
1	13608300	13608500	hypo-methylation	-0.628494
1	13609000	13610400	hypo-methylation	-0.523248
1	13609000	13610400	hypo-methylation	-0.562156
1	13609000	13610400	hypo-methylation	-0.567352
1	13609000	13610400	hypo-methylation	-0.60626
1	13610600	13610900	hypo-methylation	-0.41861
1	13610600	13610900	hypo-methylation	-0.430598
1	13611000	13611300	hypo-methylation	-0.411548
1	13611000	13611300	hypo-methylation	-0.423535
1	13638300	13638800	hypo-methylation	-0.553753
1	13640100	13640400	hypo-methylation	-0.316812
1	13641700	13642000	hypo-methylation	-0.435507
1	13642600	13642900	hypo-methylation	-0.459571
1	13651700	13652100	hypo-methylation	-0.429979
1	13652600	13653100	hypo-methylation	-0.394783
1	13761900	13762200	hypo-methylation	-0.383849
1	13766100	13767800	hypo-methylation	-0.756403
1	13768500	13769000	hypo-methylation	-0.38837
1	13782600	13783200	hypo-methylation	-0.658981
1	13785100	13785500	hypo-methylation	-0.661833
1	13785600	13786000	hypo-methylation	-0.839443
1	13786100	13787000	hypo-methylation	-0.837588
1	13788400	13789000	hypo-methylation	-0.936937
1	13789100	13790500	hypo-methylation	-0.814728
1	13791500	13792300	hypo-methylation	-0.555091
1	13800400	13800800	hypo-methylation	-0.429129
1	13814100	13814600	hypo-methylation	-0.347295
1	13837600	13838100	hypo-methylation	-0.547465
1	13853200	13853500	hypo-methylation	-0.467689
1	13886700	13886900	hypo-methylation	-0.403771
1	13887000	13887100	hypo-methylation	-0.361608
1	13893400	13894200	hypo-methylation	-0.844345
1	13894500	13896200	hypo-methylation	-0.821718
1	13901000	13901500	hypo-methylation	-0.684992
1	13922800	13923900	hypo-methylation	-0.601725
1	13922800	13923900	hyper-methylation	0.537963
1	13928000	13928400	hypo-methylation	-0.486746
1	13930600	13931100	hypo-methylation	-0.720291
1	13943700	13944100	hypo-methylation	-0.519105
1	13948600	13948900	hypo-methylation	-0.522433
1	13960400	13961300	hypo-methylation	-0.570612
1	13960400	13961300	hyper-methylation	0.5737
1	13993000	13993900	hypo-methylation	-0.616119
1	14011200	14012300	hypo-methylation	-0.738614
1	14014700	14015300	hypo-methylation	-0.818462
1	14015900	14016300	hypo-methylation	-0.864084
1	14017200	14017700	hypo-methylation	-0.899398
1	14029800	14030500	hypo-methylation	-0.418838
1	14031900	14032700	hypo-methylation	-0.590442
1	14033100	14033600	hypo-methylation	-0.660687
1	14033900	14034600	hypo-methylation	-0.816403
1	14037000	14037500	hypo-methylation	-0.468577
1	14049100	14049400	hypo-methylation	-0.691507
1	14049500	14050200	hypo-methylation	-0.801032
1	14052000	14053900	hypo-methylation	-0.774028
1	14055900	14056500	hypo-methylation	-0.580425
1	14056600	14058400	hypo-methylation	-0.655386
1	14058700	14059200	hypo-methylation	-0.906057
1	14066200	14066300	hypo-methylation	-0.301796
1	14067400	14067900	hypo-methylation	-0.431635
1	14068000	14068300	hypo-methylation	-0.361277
1	14071600	14071700	hypo-methylation	-0.495796
1	14074500	14075000	hypo-methylation	-0.469109
1	14076000	14076600	hypo-methylation	-0.585581
1	14078300	14078700	hypo-methylation	-0.4179
1	14098300	14099100	hypo-methylation	-0.562117
1	14098300	14099100	hypo-methylation	-0.622969
1	14098300	14099100	hypo-methylation	-0.670351
1	14098300	14099100	hypo-methylation	-0.731204
1	14106900	14107300	hypo-methylation	-0.551481
1	14108100	14108500	hypo-methylation	-0.537829
1	14110100	14110600	hypo-methylation	-0.620275
1	14148500	14148900	hypo-methylation	-0.646236
1	14148500	14148900	hypo-methylation	-0.690462
1	14149400	14150000	hypo-methylation	-0.500603
1	14149400	14150000	hypo-methylation	-0.544828
1	14155700	14156200	hypo-methylation	-0.377379
1	14157300	14158000	hypo-methylation	-0.655008
1	14159400	14160100	hypo-methylation	-0.662618
1	14164000	14164100	hypo-methylation	-0.807436
1	14164200	14165100	hypo-methylation	-0.786207
1	14165800	14166600	hypo-methylation	-0.675876
1	14190000	14191200	hypo-methylation	-0.617853
1	14192700	14192800	hypo-methylation	-0.483725
1	14192700	14192800	hypo-methylation	-0.494892
1	14192700	14192800	hypo-methylation	-0.531266
1	14192700	14192800	hypo-methylation	-0.542434
1	14193100	14193800	hypo-methylation	-0.608271
1	14193100	14193800	hypo-methylation	-0.619438
1	14193100	14193800	hypo-methylation	-0.655813
1	14193100	14193800	hypo-methylation	-0.66698
1	14211800	14212200	hypo-methylation	-0.388416
1	14219700	14220200	hypo-methylation	-0.91805
1	14220800	14221200	hypo-methylation	-0.893192
1	14222900	14223600	hypo-methylation	-0.666228
1	14225200	14225700	hypo-methylation	-0.706333
1	14226700	14228000	hypo-methylation	-0.849244
1	14231200	14231700	hypo-methylation	-0.910244
1	14232100	14232700	hypo-methylation	-0.938813
1	14247100	14247500	hypo-methylation	-0.517525
1	14249300	14249800	hypo-methylation	-0.778342
1	14252300	14252700	hypo-methylation	-0.381543
1	14254700	14255100	hypo-methylation	-0.893395
1	14255200	14255800	hypo-methylation	-0.568808
1	14255200	14255800	hyper-methylation	0.29575
1	14264900	14265300	hypo-methylation	-0.495795
1	14306500	14307700	hypo-methylation	-0.832815
1	14309000	14309500	hypo-methylation	-0.872322
1	14312700	14313100	hypo-methylation	-0.526614
1	14314400	14315400	hypo-methylation	-0.75075
1	14333300	14335000	hypo-methylation	-0.745304
1	14337500	14337600	hypo-methylation	-0.389991
1	14338800	14339600	hypo-methylation	-0.601232
1	14358500	14360100	hypo-methylation	-0.759903
1	14361600	14362500	hypo-methylation	-0.762986
1	14362700	14363100	hypo-methylation	-0.636699
1	14363800	14364300	hypo-methylation	-0.584292
1	14381300	14381800	hypo-methylation	-0.729182
1	14384700	14385200	hypo-methylation	-0.483442
1	14385800	14386400	hypo-methylation	-0.796167
1	14390900	14391200	hypo-methylation	-0.555311
1	14395700	14396300	hypo-methylation	-0.957156
1	14401200	14401900	hypo-methylation	-0.526837
1	14412300	14412900	hypo-methylation	-0.723708
1	14414300	14414700	hypo-methylation	-0.448263
1	14414800	14415100	hypo-methylation	-0.52765
1	14416300	14416900	hypo-methylation	-0.534299
1	14417400	14418600	hypo-methylation	-0.629051
1	14419100	14419600	hypo-methylation	-0.465881
1	14420100	14422900	hypo-methylation	-0.816469
1	14423000	14426900	hypo-methylation	-0.858621
1	14427000	14429000	hypo-methylation	-0.840567
1	14429600	14430100	hypo-methylation	-0.891517
1	14430700	14431300	hypo-methylation	-0.806846
1	14431600	14432700	hypo-methylation	-0.780301
1	14434300	14434900	hypo-methylation	-0.48358
1	14435100	14436200	hypo-methylation	-0.463793
1	14435100	14436200	hypo-methylation	-0.478075
1	14435100	14436200	hypo-methylation	-0.493785
1	14435100	14436200	hypo-methylation	-0.508066
1	14439900	14440400	hypo-methylation	-0.415351
1	14440800	14441300	hypo-methylation	-0.748008
1	14445700	14446200	hypo-methylation	-0.527705
1	14447900	14448400	hypo-methylation	-0.792539
1	14455500	14455700	hypo-methylation	-0.405728
1	14461800	14462200	hypo-methylation	-0.440426
1	14463800	14464300	hypo-methylation	-0.841502
1	14464600	14465600	hypo-methylation	-0.865047
1	14468100	14468500	hypo-methylation	-0.288679
1	14476800	14477300	hypo-methylation	-0.529516
1	14487600	14488000	hypo-methylation	-0.547473
1	14488100	14488600	hypo-methylation	-0.613163
1	14506800	14507300	hypo-methylation	-0.46688
1	14515300	14515800	hypo-methylation	-0.362942
1	14517000	14517300	hypo-methylation	-0.397796
1	14549200	14549700	hypo-methylation	-0.555682
1	14598000	14598700	hypo-methylation	-0.355546
1	14608100	14608600	hypo-methylation	-0.323313
1	14628600	14629200	hypo-methylation	-0.725628
1	14631100	14631300	hypo-methylation	-0.358633
1	14634400	14635000	hypo-methylation	-0.945337
1	14635200	14636700	hypo-methylation	-0.791027
1	14643900	14644300	hypo-methylation	-0.391877
1	14677000	14677500	hypo-methylation	-0.738532
1	14698400	14699100	hypo-methylation	-0.450279
1	14702300	14702400	hypo-methylation	-0.535644
1	14742400	14742800	hypo-methylation	-0.524112
1	14749100	14749500	hypo-methylation	-0.922338
1	14805800	14806700	hypo-methylation	-0.596846
1	14813000	14813100	hypo-methylation	-0.390791
1	14856600	14857500	hypo-methylation	-0.630219
1	14904300	14905000	hypo-methylation	-0.854855
1	14927600	14928400	hypo-methylation	-0.876631
1	14938100	14938300	hypo-methylation	-0.47631
1	14941100	14941400	hypo-methylation	-0.418713
1	14993000	14993400	hypo-methylation	-0.361325
1	15012400	15012500	hypo-methylation	-0.343223
1	15013700	15014500	hypo-methylation	-0.725587
1	15020100	15020600	hypo-methylation	-0.390598
1	15024700	15025200	hypo-methylation	-0.466139
1	15026400	15027100	hypo-methylation	-0.543044
1	15027600	15028700	hypo-methylation	-0.500379
1	15031900	15032400	hypo-methylation	-0.665344
1	15034000	15034500	hypo-methylation	-0.640203
1	15034900	15035200	hypo-methylation	-0.849418
1	15057800	15059000	hypo-methylation	-0.803956
1	15071500	15072600	hypo-methylation	-0.812411
1	15073300	15073800	hypo-methylation	-0.648541
1	15074900	15075900	hypo-methylation	-0.816385
1	15087100	15087600	hypo-methylation	-0.743272
1	15087100	15087600	hypo-methylation	-0.829567
1	15087700	15088900	hypo-methylation	-0.789299
1	15087700	15088900	hypo-methylation	-0.875594
1	15097400	15097800	hypo-methylation	-0.725075
1	15117300	15117900	hypo-methylation	-0.4422
1	15130200	15130500	hypo-methylation	-0.226467
1	15138500	15138900	hypo-methylation	-0.379977
1	15142500	15143600	hypo-methylation	-0.591514
1	15145000	15146000	hypo-methylation	-0.899317
1	15147000	15147300	hypo-methylation	-0.506081
1	15155700	15156000	hypo-methylation	-0.475009
1	15157200	15157700	hypo-methylation	-0.438279
1	15159400	15159900	hypo-methylation	-0.856604
1	15178000	15178400	hypo-methylation	-0.291038
1	15188400	15188900	hypo-methylation	-0.7074
1	15189400	15190000	hypo-methylation	-0.568098
1	15190200	15190700	hypo-methylation	-0.472496
1	15281800	15282500	hypo-methylation	-0.433505
1	15285100	15285500	hypo-methylation	-0.302216
1	15285600	15285800	hypo-methylation	-0.430477
1	15286900	15287400	hypo-methylation	-0.733847
1	15297000	15297900	hypo-methylation	-0.830263
1	15298000	15299000	hypo-methylation	-0.795387
1	15323700	15323800	hypo-methylation	-0.393232
1	15326400	15327500	hypo-methylation	-0.672717
1	15327800	15328400	hypo-methylation	-0.706696
1	15333700	15334200	hypo-methylation	-0.477666
1	15335400	15336300	hypo-methylation	-0.704444
1	15339000	15339400	hypo-methylation	-0.812016
1	15352300	15352600	hypo-methylation	-0.516719
1	15384100	15384800	hypo-methylation	-0.863387
1	15387500	15388800	hypo-methylation	-0.749491
1	15390000	15391100	hypo-methylation	-0.761169
1	15396600	15396800	hypo-methylation	-0.434027
1	15397100	15397700	hypo-methylation	-0.634524
1	15401500	15402000	hypo-methylation	-0.460167
1	15405100	15405400	hypo-methylation	-0.369314
1	15405700	15406700	hypo-methylation	-0.801141
1	15407000	15407500	hypo-methylation	-0.833932
1	15424500	15425800	hypo-methylation	-0.509828
1	15454500	15455400	hypo-methylation	-0.895091
1	15455700	15455900	hypo-methylation	-0.762775
1	15456500	15456800	hypo-methylation	-0.300909
1	15456900	15457200	hypo-methylation	-0.567387
1	15456900	15457200	hyper-methylation	0.558169
1	15482300	15484000	hypo-methylation	-0.886647
1	15484500	15485600	hypo-methylation	-0.912562
1	15486500	15487100	hypo-methylation	-0.937953
1	15489200	15489400	hypo-methylation	-0.358538
1	15490500	15490800	hypo-methylation	-0.337684
1	15511700	15512300	hypo-methylation	-0.527351
1	15561500	15561800	hypo-methylation	-0.363669
1	15562100	15562500	hypo-methylation	-0.346481
1	15575000	15575700	hypo-methylation	-0.821565
1	15575800	15576300	hypo-methylation	-0.710622
1	15646000	15646500	hypo-methylation	-0.693002
1	15694700	15694800	hypo-methylation	-0.428087
1	15778600	15779100	hypo-methylation	-0.493453
1	15809400	15810000	hypo-methylation	-0.80698
1	15810100	15810500	hypo-methylation	-0.835281
1	15815800	15816100	hypo-methylation	-0.714222
1	15816200	15816500	hypo-methylation	-0.670073
1	15817100	15817700	hypo-methylation	-0.899557
1	15817800	15818700	hypo-methylation	-0.845887
1	15819600	15820300	hypo-methylation	-0.857376
1	15820500	15821100	hypo-methylation	-0.880114
1	15850300	15851000	hypo-methylation	-0.903344
1	15935600	15936200	hypo-methylation	-0.815742
1	15936300	15937100	hypo-methylation	-0.880861
1	15937200	15937500	hypo-methylation	-0.902398
1	15941300	15941600	hypo-methylation	-0.498208
1	15976500	15977900	hypo-methylation	-0.775242
1	15978500	15979700	hypo-methylation	-0.694635
1	16049800	16050400	hypo-methylation	-0.458487
1	16050500	16051300	hypo-methylation	-0.510945
1	16064900	16065200	hypo-methylation	-0.547443
1	16069500	16070500	hypo-methylation	-0.910753
1	16070800	16071300	hypo-methylation	-0.614858
1	16099400	16100800	hypo-methylation	-0.72754
1	16112400	16113600	hypo-methylation	-0.692859
1	16118600	16119300	hypo-methylation	-0.663046
1	16119400	16120000	hypo-methylation	-0.701963
1	16120400	16120900	hypo-methylation	-0.443669
1	16122400	16122700	hypo-methylation	-0.648725
1	16140100	16140700	hypo-methylation	-0.876845
1	16140800	16144000	hypo-methylation	-0.861055
1	16144700	16145200	hypo-methylation	-0.536658
1	16149000	16149400	hypo-methylation	-0.735742
1	16149600	16150600	hypo-methylation	-0.810763
1	16155900	16156600	hypo-methylation	-0.389134
1	16156700	16157700	hypo-methylation	-0.76729
1	16184400	16184700	hypo-methylation	-0.558737
1	16185600	16186000	hypo-methylation	-0.350425
1	16202000	16202500	hypo-methylation	-0.694235
1	16229100	16229400	hypo-methylation	-0.294325
1	16233000	16233500	hypo-methylation	-0.899315
1	16294400	16295400	hypo-methylation	-0.60261
1	16301000	16301400	hypo-methylation	-0.380929
1	16306700	16307100	hypo-methylation	-0.367545
1	16338200	16338500	hypo-methylation	-0.342196
1	16349600	16350800	hypo-methylation	-0.851735
1	16365500	16365900	hypo-methylation	-0.662217
1	16367400	16367800	hypo-methylation	-0.287146
1	16370000	16370700	hypo-methylation	-0.870928
1	16371100	16371900	hypo-methylation	-0.768436
1	16377500	16378200	hypo-methylation	-0.546555
1	16378800	16379300	hypo-methylation	-0.665571
1	16384200	16384600	hypo-methylation	-0.594263
1	16393900	16394100	hypo-methylation	-0.511912
1	16396800	16397000	hypo-methylation	-0.461288
1	16397100	16397300	hypo-methylation	-0.419213
1	16448400	16448700	hypo-methylation	-0.284397
1	16449500	16450100	hypo-methylation	-0.693461
1	16456300	16456800	hypo-methylation	-0.737845
1	16470200	16470500	hypo-methylation	-0.532994
1	16474100	16475100	hypo-methylation	-0.676235
1	16494500	16494800	hypo-methylation	-0.297933
1	16501600	16502100	hypo-methylation	-0.751598
1	16502700	16503500	hypo-methylation	-0.525899
1	16502700	16503500	hyper-methylation	0.44793
1	16506100	16509200	hypo-methylation	-0.60034
1	16509700	16510800	hypo-methylation	-0.583935
1	16515200	16515500	hypo-methylation	-0.531434
1	16527900	16528200	hypo-methylation	-0.250679
1	16538700	16539500	hypo-methylation	-0.629309
1	16606800	16607100	hypo-methylation	-0.597133
1	16607200	16607900	hypo-methylation	-0.469287
1	16614400	16615000	hypo-methylation	-0.726791
1	16615300	16615600	hypo-methylation	-0.355496
1	16634500	16634900	hypo-methylation	-0.810059
1	16637200	16637500	hypo-methylation	-0.501637
1	16642500	16642900	hypo-methylation	-0.508889
1	16660600	16661700	hypo-methylation	-0.836146
1	16661800	16662000	hypo-methylation	-0.692287
1	16663000	16664000	hypo-methylation	-0.727062
1	16680800	16681900	hypo-methylation	-0.824149
1	16682100	16682700	hypo-methylation	-0.785934
1	16689900	16691200	hypo-methylation	-0.570148
1	16708800	16709200	hypo-methylation	-0.456912
1	16729000	16729500	hypo-methylation	-0.426283
1	16997900	16998200	hypo-methylation	-0.273138
1	17001800	17002600	hypo-methylation	-0.529374
1	17011800	17012300	hypo-methylation	-0.615333
1	17030700	17031400	hypo-methylation	-0.602444
1	17045300	17045700	hypo-methylation	-0.515208
1	17071800	17072000	hypo-methylation	-0.760541
1	17076400	17077300	hypo-methylation	-0.661239
1	17080200	17080500	hypo-methylation	-0.315575
1	17083600	17084300	hypo-methylation	-0.598028
1	17104600	17104900	hypo-methylation	-0.56467
1	17111100	17111800	hypo-methylation	-0.499779
1	17148100	17148500	hypo-methylation	-0.395922
1	17152700	17152800	hypo-methylation	-0.383158
1	17153600	17153900	hypo-methylation	-0.9354
1	17154100	17154400	hypo-methylation	-0.9166
1	17176400	17177000	hypo-methylation	-0.860137
1	17179000	17179700	hypo-methylation	-0.343867
1	17211000	17211400	hypo-methylation	-0.439663
1	17215600	17216100	hypo-methylation	-0.756607
1	17217100	17217600	hypo-methylation	-0.595174
1	17218400	17218600	hypo-methylation	-0.3448
1	17218400	17218600	hypo-methylation	-0.36513
1	17218700	17218800	hypo-methylation	-0.327154
1	17218700	17218800	hypo-methylation	-0.347484
1	17219600	17219800	hypo-methylation	-0.400637
1	17219600	17219800	hypo-methylation	-0.420968
1	17267000	17267500	hypo-methylation	-0.519001
1	17267600	17267900	hypo-methylation	-0.479451
1	17268600	17269200	hypo-methylation	-0.932181
1	17269400	17269900	hypo-methylation	-0.920875
1	17270200	17271600	hypo-methylation	-0.876972
1	17272100	17272800	hypo-methylation	-0.882249
1	17272900	17273700	hypo-methylation	-0.93365
1	17293700	17294300	hypo-methylation	-0.492391
1	17297000	17297600	hypo-methylation	-0.487273
1	17309100	17309500	hypo-methylation	-0.455317
1	17318800	17319300	hypo-methylation	-0.556324
1	17319800	17320600	hypo-methylation	-0.95029
1	17322100	17322700	hypo-methylation	-0.932489
1	17322800	17323300	hypo-methylation	-0.912621
1	17324400	17324900	hypo-methylation	-0.823385
1	17326800	17327100	hypo-methylation	-0.633124
1	17334000	17334600	hypo-methylation	-0.846342
1	17345000	17345500	hypo-methylation	-0.575935
1	17346800	17347300	hypo-methylation	-0.47443
1	17346800	17347300	hypo-methylation	-0.546036
1	17347500	17348200	hypo-methylation	-0.566758
1	17347500	17348200	hypo-methylation	-0.638365
1	17348500	17349000	hypo-methylation	-0.516687
1	17352400	17352900	hypo-methylation	-0.62572
1	17377700	17378100	hypo-methylation	-0.920755
1	17378800	17379200	hypo-methylation	-0.903904
1	17381200	17381300	hypo-methylation	-0.2859
1	17383300	17383800	hypo-methylation	-0.888084
1	17386900	17387400	hypo-methylation	-0.526583
1	17389800	17390800	hypo-methylation	-0.690576
1	17391400	17391700	hypo-methylation	-0.298158
1	17392600	17394000	hypo-methylation	-0.804563
1	17407200	17407700	hypo-methylation	-0.336175
1	17410200	17412000	hypo-methylation	-0.846309
1	17413700	17415400	hypo-methylation	-0.917809
1	17416200	17416700	hypo-methylation	-0.532454
1	17417500	17418200	hypo-methylation	-0.474159
1	17420100	17420400	hypo-methylation	-0.3221
1	17421900	17422400	hypo-methylation	-0.460415
1	17429500	17430200	hypo-methylation	-0.65481
1	17435600	17436100	hypo-methylation	-0.4631
1	17446100	17446400	hypo-methylation	-0.597688
1	17446500	17447000	hypo-methylation	-0.764427
1	17447100	17447600	hypo-methylation	-0.763693
1	17447800	17448600	hypo-methylation	-0.764458
1	17449700	17450300	hypo-methylation	-0.673533
1	17453800	17453900	hypo-methylation	-0.332857
1	17483400	17483700	hypo-methylation	-0.33486
1	17484000	17484600	hypo-methylation	-0.664419
1	17485300	17486300	hypo-methylation	-0.637647
1	17489100	17489500	hypo-methylation	-0.474915
1	17494800	17495900	hypo-methylation	-0.775603
1	17496000	17498700	hypo-methylation	-0.75522
1	17503300	17503700	hypo-methylation	-0.373725
1	17507300	17508200	hypo-methylation	-0.632424
1	17508700	17510100	hypo-methylation	-0.728444
1	17514300	17515000	hypo-methylation	-0.611529
1	17563400	17563900	hypo-methylation	-0.77423
1	17568000	17568500	hypo-methylation	-0.616988
1	17589400	17590100	hypo-methylation	-0.808541
1	17590300	17591900	hypo-methylation	-0.758725
1	17592300	17592800	hypo-methylation	-0.928325
1	17593100	17595100	hypo-methylation	-0.760646
1	17595200	17595500	hypo-methylation	-0.603579
1	17603300	17603800	hypo-methylation	-0.399256
1	17606600	17606800	hypo-methylation	-0.691911
1	17607200	17607700	hypo-methylation	-0.744759
1	17608400	17608900	hypo-methylation	-0.507671
1	17610900	17611900	hypo-methylation	-0.678353
1	17613100	17613600	hypo-methylation	-0.551562
1	17619200	17620200	hypo-methylation	-0.696476
1	17620700	17621200	hypo-methylation	-0.869364
1	17627500	17628100	hypo-methylation	-0.630051
1	17677200	17678300	hypo-methylation	-0.696745
1	17685600	17686700	hypo-methylation	-0.426821
1	17685600	17686700	hypo-methylation	-0.455354
1	17685600	17686700	hypo-methylation	-0.483646
[truncated: 37,971 more rows]

## Sheet: CHG DMRs in Nip-9311
Supplementary Data 5. List of differential methylated regions between parental alleles in F1 endosperm.
chromosome	start	end	Comparison between parental allele
			Maternal - Paternal allele	difference of methylation levels
1	326000	326700	hypo-methylation	-0.309799
1	335000	335500	hypo-methylation	-0.46626
1	426000	426500	hyper-methylation	0.27743
1	807400	807800	hypo-methylation	-0.33127
1	1542700	1543200	hypo-methylation	-0.300414
1	1595900	1596300	hypo-methylation	-0.319528
1	1596600	1596800	hypo-methylation	-0.22755
1	1796700	1797100	hypo-methylation	-0.277817
1	1912200	1912400	hypo-methylation	-0.316837
1	2152200	2152600	hypo-methylation	-0.309408
1	2161400	2162000	hypo-methylation	-0.392401
1	2176300	2176800	hypo-methylation	-0.286242
1	2419700	2420200	hypo-methylation	-0.666819
1	2537800	2538500	hypo-methylation	-0.363806
1	2545900	2546800	hypo-methylation	-0.438162
1	2555700	2556200	hypo-methylation	-0.348815
1	2556400	2556800	hypo-methylation	-0.397523
1	2598400	2599000	hypo-methylation	-0.379468
1	2649700	2649900	hypo-methylation	-0.351645
1	2677000	2677300	hypo-methylation	-0.461835
1	2868000	2868800	hypo-methylation	-0.413326
1	2869200	2869300	hypo-methylation	-0.357324
1	2869400	2869700	hypo-methylation	-0.331224
1	2870200	2870700	hypo-methylation	-0.415029
1	2969400	2969900	hypo-methylation	-0.364181
1	3391100	3391500	hypo-methylation	-0.393931
1	3526200	3526900	hypo-methylation	-0.332085
1	4018700	4019000	hypo-methylation	-0.345463
1	4086700	4087200	hypo-methylation	-0.310586
1	4088500	4089000	hypo-methylation	-0.294837
1	4089400	4089700	hypo-methylation	-0.283234
1	4141400	4141800	hypo-methylation	-0.43365
1	4182400	4182700	hyper-methylation	0.259958
1	4261200	4261800	hypo-methylation	-0.535225
1	4267900	4268200	hypo-methylation	-0.449528
1	4306100	4306400	hypo-methylation	-0.290657
1	4921800	4921900	hyper-methylation	0.314173
1	5006000	5006300	hypo-methylation	-0.28364
1	5092400	5092600	hypo-methylation	-0.297492
1	5197400	5197800	hypo-methylation	-0.295289
1	5217200	5218400	hypo-methylation	-0.46884
1	5516400	5516500	hypo-methylation	-0.244246
1	5516900	5517200	hypo-methylation	-0.314777
1	5517500	5518000	hypo-methylation	-0.296708
1	5532000	5532100	hypo-methylation	-0.262139
1	5545300	5545800	hypo-methylation	-0.46682
1	5586300	5586500	hyper-methylation	0.235042
1	5587100	5587500	hypo-methylation	-0.382022
1	5589900	5590500	hypo-methylation	-0.435661
1	5600000	5600500	hypo-methylation	-0.470647
1	5600600	5600800	hypo-methylation	-0.449005
1	5600900	5601200	hypo-methylation	-0.430079
1	5693400	5693700	hypo-methylation	-0.289115
1	5831500	5831900	hypo-methylation	-0.374866
1	6197700	6198800	hypo-methylation	-0.391023
1	6298400	6298900	hypo-methylation	-0.405809
1	6332500	6333100	hypo-methylation	-0.338182
1	6439000	6440400	hypo-methylation	-0.461313
1	6441600	6442000	hypo-methylation	-0.343438
1	6458000	6458300	hypo-methylation	-0.256815
1	6521700	6522200	hypo-methylation	-0.428724
1	6579100	6579500	hypo-methylation	-0.357352
1	6870000	6870900	hypo-methylation	-0.351753
1	6942700	6943200	hypo-methylation	-0.557036
1	6967000	6967500	hypo-methylation	-0.511786
1	7074000	7074200	hypo-methylation	-0.397091
1	7074700	7074900	hypo-methylation	-0.312792
1	7153900	7154200	hypo-methylation	-0.345079
1	7160700	7162400	hyper-methylation	0.42148
1	7170600	7171100	hypo-methylation	-0.387979
1	7171400	7171900	hypo-methylation	-0.288562
1	7229000	7230200	hypo-methylation	-0.495131
1	7242400	7242800	hypo-methylation	-0.357864
1	7244100	7244400	hypo-methylation	-0.373184
1	7357800	7358200	hypo-methylation	-0.40444
1	7397000	7397200	hypo-methylation	-0.340336
1	7448600	7448900	hypo-methylation	-0.244679
1	7454700	7454900	hypo-methylation	-0.263624
1	7466400	7466500	hypo-methylation	-0.30347
1	7469100	7469600	hypo-methylation	-0.356424
1	7484800	7484900	hypo-methylation	-0.461046
1	7485000	7485300	hypo-methylation	-0.396284
1	7499100	7500000	hypo-methylation	-0.50551
1	7500900	7501800	hypo-methylation	-0.528986
1	7505100	7505700	hypo-methylation	-0.42899
1	7534600	7534700	hypo-methylation	-0.294829
1	7545300	7546000	hypo-methylation	-0.31746
1	7616200	7616900	hypo-methylation	-0.307091
1	7715300	7715400	hyper-methylation	0.293861
1	7800700	7800900	hypo-methylation	-0.32408
1	7812000	7812100	hypo-methylation	-0.264302
1	7812300	7812600	hypo-methylation	-0.314553
1	7984000	7984100	hypo-methylation	-0.259969
1	8389600	8389800	hypo-methylation	-0.351998
1	8464200	8464300	hypo-methylation	-0.389186
1	8464800	8465100	hypo-methylation	-0.398488
1	8601600	8601900	hypo-methylation	-0.401494
1	8612600	8613700	hypo-methylation	-0.381429
1	8627000	8627400	hypo-methylation	-0.357
1	8773700	8774200	hypo-methylation	-0.345536
1	8814000	8814300	hypo-methylation	-0.251238
1	9087400	9087700	hypo-methylation	-0.251896
1	9256800	9257100	hypo-methylation	-0.254125
1	9437500	9437700	hypo-methylation	-0.330115
1	9457600	9458000	hypo-methylation	-0.341062
1	9484700	9484800	hypo-methylation	-0.306689
1	9485100	9485200	hypo-methylation	-0.328275
1	9485400	9486500	hypo-methylation	-0.336379
1	9486600	9487000	hypo-methylation	-0.340416
1	9554200	9554700	hypo-methylation	-0.356781
1	9570400	9570800	hypo-methylation	-0.309926
1	9598800	9599300	hypo-methylation	-0.236687
1	9640600	9642000	hypo-methylation	-0.393726
1	9663600	9664300	hypo-methylation	-0.359596
1	9676000	9676800	hypo-methylation	-0.505684
1	9710000	9710700	hypo-methylation	-0.434511
1	9763000	9763300	hypo-methylation	-0.342571
1	9763600	9764000	hypo-methylation	-0.370783
1	9774300	9774700	hypo-methylation	-0.309638
1	9824500	9824800	hypo-methylation	-0.378242
1	9830100	9831000	hypo-methylation	-0.340237
1	9857700	9858400	hypo-methylation	-0.333352
1	9877500	9877900	hypo-methylation	-0.308387
1	9907600	9907800	hypo-methylation	-0.275225
1	9924500	9925100	hypo-methylation	-0.394274
1	9927700	9927800	hypo-methylation	-0.354097
1	10062500	10063000	hypo-methylation	-0.313304
1	10064600	10064700	hypo-methylation	-0.503542
1	10104600	10105200	hypo-methylation	-0.363854
1	10192800	10193100	hypo-methylation	-0.339637
1	10223600	10224100	hypo-methylation	-0.246171
1	10227500	10228500	hypo-methylation	-0.341554
1	10242900	10243200	hypo-methylation	-0.286327
1	10290500	10290900	hypo-methylation	-0.32479
1	10318000	10318200	hypo-methylation	-0.3345
1	10352800	10353300	hypo-methylation	-0.452029
1	10480100	10480400	hypo-methylation	-0.351847
1	10501600	10501700	hypo-methylation	-0.296971
1	10503900	10504200	hypo-methylation	-0.2342
1	10506200	10506500	hypo-methylation	-0.41486
1	10507300	10507600	hypo-methylation	-0.443346
1	10617900	10618200	hypo-methylation	-0.281135
1	10629700	10630100	hypo-methylation	-0.40267
1	10715400	10715700	hypo-methylation	-0.290824
1	10716300	10716700	hypo-methylation	-0.338355
1	10994000	10994800	hypo-methylation	-0.378738
1	11018500	11018900	hypo-methylation	-0.337494
1	11019400	11020500	hypo-methylation	-0.30428
1	11021600	11021900	hypo-methylation	-0.305461
1	11034600	11034900	hyper-methylation	0.30585
1	11136200	11136300	hyper-methylation	0.252042
1	11193200	11193800	hypo-methylation	-0.513298
1	11474000	11474400	hypo-methylation	-0.299422
1	11476200	11476500	hypo-methylation	-0.320773
1	11513100	11513800	hypo-methylation	-0.353695
1	11514000	11514400	hypo-methylation	-0.515305
1	11539900	11540300	hypo-methylation	-0.348357
1	11707200	11707600	hypo-methylation	-0.261157
1	11707900	11708200	hypo-methylation	-0.269841
1	11781000	11781500	hypo-methylation	-0.321276
1	11824800	11825200	hypo-methylation	-0.283496
1	11827200	11827700	hypo-methylation	-0.378594
1	11957100	11957700	hypo-methylation	-0.324975
1	11973500	11973600	hypo-methylation	-0.27334
1	11994500	11994800	hypo-methylation	-0.291262
1	12061300	12061400	hyper-methylation	0.318825
1	12089500	12090200	hypo-methylation	-0.562385
1	12143200	12143500	hypo-methylation	-0.285062
1	12163800	12163900	hypo-methylation	-0.298318
1	12207000	12207100	hypo-methylation	-0.297183
1	12207600	12208000	hypo-methylation	-0.323415
1	12263400	12264100	hypo-methylation	-0.461825
1	12264200	12264500	hypo-methylation	-0.45245
1	12283500	12285100	hypo-methylation	-0.46041
1	12300300	12300600	hypo-methylation	-0.343388
1	12313900	12314200	hyper-methylation	0.2505
1	12339200	12339500	hypo-methylation	-0.35599
1	12339800	12340700	hypo-methylation	-0.473534
1	12398600	12398900	hypo-methylation	-0.3351
1	12413300	12413500	hyper-methylation	0.359201
1	12612700	12613000	hypo-methylation	-0.304428
1	12674300	12674400	hypo-methylation	-0.278781
1	12680200	12680900	hypo-methylation	-0.323044
1	12711300	12711500	hypo-methylation	-0.360303
1	12767400	12767600	hypo-methylation	-0.293579
1	12906200	12906700	hypo-methylation	-0.304411
1	12907100	12907200	hypo-methylation	-0.336319
1	12907500	12908200	hypo-methylation	-0.434852
1	12908500	12909000	hypo-methylation	-0.385865
1	12912000	12913500	hypo-methylation	-0.43962
1	13123100	13123600	hypo-methylation	-0.384455
1	13135000	13135600	hypo-methylation	-0.334346
1	13262800	13263600	hypo-methylation	-0.516264
1	13264000	13264500	hypo-methylation	-0.424794
1	13268500	13268800	hypo-methylation	-0.389887
1	13290200	13291000	hypo-methylation	-0.46951
1	13306200	13306600	hypo-methylation	-0.358945
1	13481900	13482000	hyper-methylation	0.301618
1	13482200	13482700	hyper-methylation	0.301976
1	13513200	13513700	hypo-methylation	-0.383127
1	13513800	13514300	hypo-methylation	-0.42598
1	13635300	13635400	hypo-methylation	-0.368571
1	13635500	13636000	hypo-methylation	-0.363288
1	13636300	13637300	hypo-methylation	-0.39502
1	13637800	13638000	hypo-methylation	-0.385688
1	13638200	13639000	hypo-methylation	-0.391567
1	13766100	13766400	hypo-methylation	-0.305601
1	13766800	13767000	hypo-methylation	-0.329851
1	13767500	13767800	hypo-methylation	-0.285326
1	13782700	13783000	hypo-methylation	-0.271062
1	13785600	13785900	hypo-methylation	-0.30352
1	13786200	13786600	hypo-methylation	-0.325458
1	13788800	13789600	hypo-methylation	-0.296469
1	13789700	13790100	hypo-methylation	-0.275734
1	13893800	13894400	hypo-methylation	-0.44069
1	13894500	13895800	hypo-methylation	-0.516898
1	14011600	14012100	hypo-methylation	-0.44664
1	14057600	14058400	hypo-methylation	-0.394911
1	14066200	14066400	hypo-methylation	-0.366131
1	14075900	14076400	hypo-methylation	-0.381025
1	14159500	14160000	hypo-methylation	-0.346442
1	14163500	14163900	hypo-methylation	-0.343317
1	14164200	14165200	hypo-methylation	-0.342461
1	14222200	14222500	hypo-methylation	-0.326692
1	14222700	14223100	hypo-methylation	-0.331226
1	14223200	14223300	hypo-methylation	-0.33465
1	14334200	14334500	hypo-methylation	-0.279979
1	14339300	14339600	hypo-methylation	-0.314234
1	14359300	14359800	hypo-methylation	-0.410751
1	14411700	14412100	hyper-methylation	0.330417
1	14418300	14418800	hypo-methylation	-0.297769
1	14419500	14420000	hypo-methylation	-0.278712
1	14420200	14420700	hypo-methylation	-0.265362
1	14420900	14421400	hypo-methylation	-0.269242
1	14421700	14423300	hypo-methylation	-0.362322
1	14423800	14424300	hypo-methylation	-0.281676
1	14424700	14425100	hypo-methylation	-0.28843
1	14425400	14426500	hypo-methylation	-0.29721
1	14427300	14428200	hypo-methylation	-0.318091
1	14429100	14430500	hypo-methylation	-0.33322
1	14511600	14512200	hyper-methylation	0.308416
1	14608700	14608900	hypo-methylation	-0.283869
1	14698600	14699100	hypo-methylation	-0.37131
1	14731400	14731500	hyper-methylation	0.264654
1	14927600	14927900	hypo-methylation	-0.248916
1	15014200	15014500	hypo-methylation	-0.336713
1	15014600	15014700	hypo-methylation	-0.348628
1	15014800	15015300	hypo-methylation	-0.375997
1	15034000	15034400	hypo-methylation	-0.360492
1	15035000	15035500	hypo-methylation	-0.392937
1	15057900	15058700	hypo-methylation	-0.422557
1	15142600	15143600	hypo-methylation	-0.290007
1	15144900	15145800	hypo-methylation	-0.392686
1	15298500	15298900	hypo-methylation	-0.291859
1	15384100	15384600	hypo-methylation	-0.336422
1	15387600	15388100	hypo-methylation	-0.335686
1	15397700	15397800	hypo-methylation	-0.28285
1	15398600	15398800	hypo-methylation	-0.4033
1	15574600	15575300	hypo-methylation	-0.317489
1	15575500	15575600	hypo-methylation	-0.300836
1	15818500	15818900	hypo-methylation	-0.281541
1	15819400	15820000	hypo-methylation	-0.28644
1	15820200	15820700	hypo-methylation	-0.280915
1	15850600	15850800	hypo-methylation	-0.241984
1	16069900	16070400	hypo-methylation	-0.332356
1	16140200	16140700	hypo-methylation	-0.308283
1	16141300	16142300	hypo-methylation	-0.454371
1	16142900	16143900	hypo-methylation	-0.36471
1	16144800	16145100	hypo-methylation	-0.353454
1	16149900	16150000	hypo-methylation	-0.261424
1	16157000	16157600	hypo-methylation	-0.501536
1	16228400	16228600	hypo-methylation	-0.28049
1	16306700	16306800	hypo-methylation	-0.28275
1	16345700	16345800	hypo-methylation	-0.299523
1	16345900	16346000	hypo-methylation	-0.273674
1	16349900	16350500	hypo-methylation	-0.497524
1	16396500	16396600	hypo-methylation	-0.3559
1	16396800	16397300	hypo-methylation	-0.362725
1	16587900	16588200	hypo-methylation	-0.348662
1	16634300	16634600	hypo-methylation	-0.3891
1	16690000	16690600	hypo-methylation	-0.46087
1	16690700	16691200	hypo-methylation	-0.422882
1	17011900	17012000	hypo-methylation	-0.415995
1	17083800	17084100	hypo-methylation	-0.3298
1	17176400	17176900	hypo-methylation	-0.523392
1	17184000	17184200	hyper-methylation	0.273392
1	17327000	17327200	hypo-methylation	-0.374049
1	17377300	17377600	hypo-methylation	-0.342925
1	17377700	17379100	hypo-methylation	-0.369455
1	17391300	17391800	hypo-methylation	-0.435783
1	17393000	17393100	hypo-methylation	-0.380571
1	17393300	17393900	hypo-methylation	-0.395612
1	17411200	17411700	hypo-methylation	-0.284945
1	17414300	17414800	hypo-methylation	-0.334619
1	17415700	17415900	hypo-methylation	-0.256097
1	17417800	17418200	hypo-methylation	-0.315305
1	17447800	17448500	hypo-methylation	-0.375231
1	17449700	17450300	hypo-methylation	-0.447073
1	17484200	17484500	hypo-methylation	-0.372567
1	17494000	17494100	hypo-methylation	-0.354746
1	17494800	17495300	hypo-methylation	-0.352643
1	17495800	17496100	hypo-methylation	-0.32119
1	17496300	17496800	hypo-methylation	-0.333761
1	17496900	17497000	hypo-methylation	-0.306129
1	17515400	17515700	hypo-methylation	-0.282025
1	17589500	17590000	hypo-methylation	-0.518408
1	17590300	17590900	hypo-methylation	-0.308266
1	17591000	17591200	hypo-methylation	-0.30646
1	17591300	17591600	hypo-methylation	-0.323616
1	17592200	17592700	hypo-methylation	-0.301526
1	17593600	17593900	hypo-methylation	-0.274786
1	17610800	17611300	hypo-methylation	-0.349784
1	17627900	17628200	hypo-methylation	-0.311135
1	17687700	17688200	hypo-methylation	-0.410413
1	17688900	17689200	hypo-methylation	-0.526517
1	17695500	17695900	hypo-methylation	-0.496643
1	17793900	17794600	hypo-methylation	-0.338124
1	17795200	17796000	hypo-methylation	-0.462661
1	17803500	17803600	hypo-methylation	-0.288696
1	17850100	17850200	hyper-methylation	0.309667
1	17899000	17899400	hypo-methylation	-0.347636
1	17899500	17900200	hypo-methylation	-0.301621
1	17958300	17958800	hypo-methylation	-0.350703
1	18031100	18031700	hypo-methylation	-0.317261
1	18038300	18038700	hypo-methylation	-0.316947
1	18040600	18041300	hypo-methylation	-0.607907
1	18065300	18065700	hypo-methylation	-0.448566
1	18065800	18066100	hypo-methylation	-0.358133
1	18069900	18070400	hypo-methylation	-0.314886
1	18099500	18100000	hypo-methylation	-0.418114
1	18100300	18101100	hypo-methylation	-0.359618
1	18133100	18133400	hypo-methylation	-0.328628
1	18146700	18146900	hypo-methylation	-0.414378
1	18223700	18223800	hypo-methylation	-0.265985
1	18357600	18357900	hypo-methylation	-0.328255
1	18358000	18358400	hypo-methylation	-0.338114
1	18445300	18446300	hypo-methylation	-0.496907
1	18682700	18683200	hypo-methylation	-0.375867
1	18714300	18714500	hypo-methylation	-0.301074
1	18714700	18714900	hypo-methylation	-0.331949
1	18745300	18745500	hypo-methylation	-0.295359
1	18798200	18798600	hyper-methylation	0.278073
1	18799400	18799500	hypo-methylation	-0.333094
1	18816200	18816800	hypo-methylation	-0.455895
1	18825100	18825300	hypo-methylation	-0.310387
1	18858300	18858900	hypo-methylation	-0.36659
1	18861200	18861500	hypo-methylation	-0.412385
1	18861700	18862500	hypo-methylation	-0.478959
1	18863500	18864300	hypo-methylation	-0.429652
1	18897900	18898200	hypo-methylation	-0.28596
1	18920600	18921000	hypo-methylation	-0.35199
1	18928800	18929200	hypo-methylation	-0.405925
1	18930800	18931100	hypo-methylation	-0.449329
1	18931200	18932400	hypo-methylation	-0.480641
1	18932700	18933500	hypo-methylation	-0.683564
1	19052300	19052400	hyper-methylation	0.263375
1	19074100	19074400	hypo-methylation	-0.483934
1	19100100	19100600	hypo-methylation	-0.426092
1	19101100	19101300	hypo-methylation	-0.331091
1	19148000	19148300	hypo-methylation	-0.333338
1	19173000	19173200	hyper-methylation	0.2664
1	19195800	19196300	hypo-methylation	-0.367127
1	19197900	19198700	hypo-methylation	-0.300609
1	19207900	19208400	hypo-methylation	-0.330083
1	19263600	19264000	hypo-methylation	-0.443366
1	19291200	19291400	hypo-methylation	-0.286809
1	19341500	19341800	hyper-methylation	0.303814
1	19363600	19363800	hypo-methylation	-0.262892
1	19374800	19375200	hypo-methylation	-0.387738
1	19464700	19464900	hyper-methylation	0.32665
1	19639100	19640100	hypo-methylation	-0.328819
1	19970900	19971400	hypo-methylation	-0.368281
1	20048800	20048900	hypo-methylation	-0.273787
1	20266400	20267000	hypo-methylation	-0.311528
1	20267100	20267800	hypo-methylation	-0.310032
1	20267900	20268100	hypo-methylation	-0.273472
1	20276900	20277200	hypo-methylation	-0.293855
1	20279100	20279400	hypo-methylation	-0.252046
1	20320000	20320400	hypo-methylation	-0.418629
1	20320600	20321100	hypo-methylation	-0.325759
1	20413000	20413300	hypo-methylation	-0.326321
1	20470100	20470300	hypo-methylation	-0.262412
1	20503900	20504700	hypo-methylation	-0.465087
1	20589800	20590000	hypo-methylation	-0.360642
1	20590200	20590700	hypo-methylation	-0.402492
1	20592800	20593900	hypo-methylation	-0.318401
1	20927700	20928000	hypo-methylation	-0.286675
1	20985300	20985500	hyper-methylation	0.27988
1	21008600	21009600	hypo-methylation	-0.375245
1	21010800	21011300	hypo-methylation	-0.353164
1	21018600	21018900	hypo-methylation	-0.266182
1	21118300	21118600	hypo-methylation	-0.592125
1	21876000	21876500	hypo-methylation	-0.300577
1	21877900	21878400	hypo-methylation	-0.418554
1	21916400	21917600	hypo-methylation	-0.524278
1	21930100	21930200	hypo-methylation	-0.2306
1	22011100	22011200	hypo-methylation	-0.308963
1	22011400	22011700	hypo-methylation	-0.319937
1	22012800	22013300	hypo-methylation	-0.362749
1	22015200	22015600	hypo-methylation	-0.435665
1	22027400	22028000	hypo-methylation	-0.38718
1	22145200	22145900	hypo-methylation	-0.472329
1	22245400	22245700	hypo-methylation	-0.339465
1	22291500	22292100	hypo-methylation	-0.408007
1	22399600	22400100	hypo-methylation	-0.275386
1	22459100	22459800	hypo-methylation	-0.381087
1	22493100	22493500	hypo-methylation	-0.473504
1	22532200	22532500	hyper-methylation	0.280843
1	22584500	22584800	hypo-methylation	-0.289765
1	22586900	22587100	hypo-methylation	-0.415275
1	22665400	22665900	hyper-methylation	0.25425
1	22692700	22693200	hypo-methylation	-0.286067
1	22774400	22775000	hypo-methylation	-0.468015
1	22787000	22787500	hypo-methylation	-0.409683
1	22798000	22798500	hypo-methylation	-0.330686
1	22814800	22815100	hypo-methylation	-0.331993
1	22816400	22816700	hypo-methylation	-0.265317
1	22873600	22874100	hypo-methylation	-0.32712
1	22878100	22878200	hypo-methylation	-0.297675
1	22883100	22883400	hypo-methylation	-0.296412
1	22942200	22943000	hypo-methylation	-0.30434
1	23188200	23188700	hypo-methylation	-0.36267
1	23338000	23338500	hypo-methylation	-0.296473
1	23346900	23347300	hypo-methylation	-0.563573
1	23439900	23440100	hypo-methylation	-0.429306
1	23547500	23547900	hypo-methylation	-0.395829
1	23621300	23621700	hypo-methylation	-0.428293
1	23673300	23673500	hypo-methylation	-0.262913
1	23690000	23690500	hypo-methylation	-0.36705
1	23916500	23916700	hypo-methylation	-0.278477
1	23918900	23919300	hypo-methylation	-0.35176
1	23928700	23928900	hypo-methylation	-0.268188
1	23951400	23952100	hypo-methylation	-0.397616
1	23952200	23952300	hypo-methylation	-0.376853
1	23954300	23954800	hypo-methylation	-0.286029
1	23955900	23956300	hypo-methylation	-0.349529
1	23956900	23957000	hypo-methylation	-0.35412
1	23957100	23957600	hypo-methylation	-0.334105
1	23964300	23964600	hypo-methylation	-0.348748
1	24061800	24061900	hyper-methylation	0.254418
1	24106300	24106600	hypo-methylation	-0.314165
1	24125400	24125800	hypo-methylation	-0.51825
1	24131000	24131600	hypo-methylation	-0.362268
1	24135500	24135800	hypo-methylation	-0.377915
1	24184100	24184400	hypo-methylation	-0.27525
1	24186600	24187000	hypo-methylation	-0.345525
1	24215900	24216300	hypo-methylation	-0.294266
1	24236000	24236300	hypo-methylation	-0.245541
1	24254600	24255100	hypo-methylation	-0.363079
1	24286800	24287100	hypo-methylation	-0.304619
1	24291000	24291600	hypo-methylation	-0.387206
1	24291700	24291800	hypo-methylation	-0.385668
1	24308900	24309300	hypo-methylation	-0.287591
1	24349700	24349900	hypo-methylation	-0.391887
1	24374900	24375600	hypo-methylation	-0.366456
1	24478600	24478900	hypo-methylation	-0.52729
1	24479100	24479800	hypo-methylation	-0.560029
1	24509000	24509300	hypo-methylation	-0.250808
1	24511100	24511600	hypo-methylation	-0.490911
1	24624000	24624400	hypo-methylation	-0.444491
1	24627800	24628300	hypo-methylation	-0.385504
1	24632900	24633300	hypo-methylation	-0.354137
1	24728100	24728600	hypo-methylation	-0.496476
1	24729100	24729600	hypo-methylation	-0.430433
1	24861000	24861300	hypo-methylation	-0.341419
1	24955700	24956300	hypo-methylation	-0.35995
1	24956700	24957200	hypo-methylation	-0.446519
1	25023500	25024000	hypo-methylation	-0.3629
1	25024200	25024600	hypo-methylation	-0.34472
1	25024900	25025200	hypo-methylation	-0.355696
1	25088800	25089100	hypo-methylation	-0.295482
1	25343700	25344300	hypo-methylation	-0.38741
1	25390000	25391400	hypo-methylation	-0.443788
1	25393700	25393800	hypo-methylation	-0.277548
1	25399200	25399400	hypo-methylation	-0.306331
1	25400000	25400300	hypo-methylation	-0.319176
1	25401000	25401100	hypo-methylation	-0.324508
1	25465200	25465500	hypo-methylation	-0.462857
1	25481300	25481600	hypo-methylation	-0.329076
1	25481700	25482300	hypo-methylation	-0.325447
1	25487100	25487500	hypo-methylation	-0.29825
1	25497200	25497800	hypo-methylation	-0.416257
1	25589600	25590100	hypo-methylation	-0.456528
1	25964700	25965000	hypo-methylation	-0.255094
1	26066100	26066600	hypo-methylation	-0.775542
1	26143900	26144100	hyper-methylation	0.27865
1	26171900	26172200	hypo-methylation	-0.488438
1	26172300	26172900	hypo-methylation	-0.470178
1	26178100	26178600	hypo-methylation	-0.487833
1	26255100	26255600	hypo-methylation	-0.568985
1	26280000	26280400	hypo-methylation	-0.473219
1	26317300	26317400	hypo-methylation	-0.294469
1	26362300	26362700	hypo-methylation	-0.371993
1	26399300	26399500	hypo-methylation	-0.430105
1	26399600	26399700	hypo-methylation	-0.428322
1	26441500	26442300	hypo-methylation	-0.474817
1	26442400	26442600	hypo-methylation	-0.366321
1	26444000	26444300	hypo-methylation	-0.303258
1	26586100	26586400	hypo-methylation	-0.303121
1	26731500	26731800	hypo-methylation	-0.373804
1	26810200	26810600	hypo-methylation	-0.297779
1	26846600	26846900	hypo-methylation	-0.290805
1	26847100	26847400	hypo-methylation	-0.380156
1	26883600	26883900	hyper-methylation	0.259721
1	26905900	26906700	hypo-methylation	-0.394736
1	26909900	26910600	hypo-methylation	-0.469044
1	26910700	26911000	hypo-methylation	-0.414231
1	26925100	26925500	hypo-methylation	-0.340446
1	26927000	26927300	hypo-methylation	-0.478047
1	26929400	26930000	hypo-methylation	-0.360904
1	27134600	27134800	hypo-methylation	-0.286774
1	27144100	27144600	hypo-methylation	-0.341056
1	27170200	27170500	hypo-methylation	-0.287392
1	27170600	27170900	hypo-methylation	-0.282891
1	27225000	27225400	hypo-methylation	-0.328223
1	27226900	27227900	hypo-methylation	-0.384498
1	27256300	27256600	hypo-methylation	-0.292527
1	27284700	27284900	hyper-methylation	0.262711
1	27314100	27314600	hypo-methylation	-0.306712
1	27548200	27548500	hypo-methylation	-0.358703
1	27647000	27647300	hypo-methylation	-0.257238
1	27654900	27655800	hypo-methylation	-0.383464
1	27672000	27672700	hypo-methylation	-0.40719
1	27740200	27740500	hypo-methylation	-0.365962
1	27774600	27774700	hypo-methylation	-0.32418
1	27843700	27844200	hypo-methylation	-0.425665
1	27858100	27858200	hypo-methylation	-0.264537
1	27860500	27861100	hypo-methylation	-0.283162
1	27872200	27872500	hypo-methylation	-0.372354
1	28178000	28178500	hypo-methylation	-0.344117
1	28178800	28179700	hypo-methylation	-0.39085
1	28194200	28194500	hypo-methylation	-0.2691
1	28276900	28277000	hypo-methylation	-0.3448
1	28363200	28363600	hypo-methylation	-0.298927
1	28422300	28422700	hypo-methylation	-0.319972
1	28441400	28441500	hypo-methylation	-0.314295
1	28463800	28464500	hypo-methylation	-0.438638
1	28471800	28472200	hypo-methylation	-0.263512
1	28570800	28571300	hypo-methylation	-0.436453
1	28661000	28661600	hypo-methylation	-0.407176
1	28907600	28908100	hypo-methylation	-0.27237
1	28913200	28913700	hypo-methylation	-0.268984
1	29047800	29048000	hypo-methylation	-0.321381
1	29048200	29048700	hypo-methylation	-0.325526
1	29061400	29061700	hypo-methylation	-0.272002
1	29077600	29077900	hypo-methylation	-0.309375
1	29210600	29210900	hypo-methylation	-0.4438
1	29216100	29216500	hypo-methylation	-0.354117
1	29228500	29229000	hypo-methylation	-0.42089
1	29274600	29275100	hypo-methylation	-0.359775
1	29303500	29303600	hypo-methylation	-0.291347
1	29402100	29402600	hypo-methylation	-0.361586
1	29404200	29404800	hypo-methylation	-0.315843
1	29454600	29455200	hypo-methylation	-0.592213
1	29580600	29580900	hypo-methylation	-0.310511
1	29586800	29587700	hypo-methylation	-0.352282
1	29728100	29728400	hypo-methylation	-0.377835
1	29908800	29908900	hypo-methylation	-0.251891
1	29914100	29914500	hypo-methylation	-0.455093
1	29982300	29982400	hypo-methylation	-0.243931
1	30204200	30204700	hypo-methylation	-0.39823
1	30246600	30246700	hypo-methylation	-0.299482
1	30409900	30410400	hypo-methylation	-0.335621
1	30511800	30512200	hypo-methylation	-0.268816
1	30518900	30519200	hypo-methylation	-0.303875
1	30554000	30555100	hypo-methylation	-0.520042
1	30644800	30645500	hypo-methylation	-0.361526
1	30859600	30859700	hypo-methylation	-0.39067
1	30859800	30860300	hypo-methylation	-0.393814
1	30944000	30944100	hypo-methylation	-0.295423
1	31117700	31118100	hypo-methylation	-0.434169
1	31183300	31184000	hypo-methylation	-0.393258
1	31184200	31184300	hypo-methylation	-0.354793
1	31256700	31257100	hypo-methylation	-0.288914
1	31280800	31281100	hypo-methylation	-0.390788
1	31281200	31281400	hypo-methylation	-0.434491
1	31305800	31306800	hypo-methylation	-0.436469
1	31341400	31341500	hypo-methylation	-0.291078
1	31341700	31341900	hypo-methylation	-0.308803
1	31343300	31343800	hypo-methylation	-0.349548
1	31344000	31344400	hypo-methylation	-0.314966
1	31345100	31345700	hypo-methylation	-0.372485
1	31347100	31347800	hypo-methylation	-0.502763
1	31347900	31348800	hypo-methylation	-0.509391
1	31348900	31349100	hypo-methylation	-0.505048
1	31429700	31430200	hypo-methylation	-0.454688
1	31435100	31435900	hypo-methylation	-0.389752
1	31436500	31437000	hypo-methylation	-0.369619
1	31549500	31550100	hypo-methylation	-0.521659
1	31589300	31589800	hypo-methylation	-0.423044
1	31690000	31691000	hypo-methylation	-0.367086
1	31696100	31696400	hypo-methylation	-0.320104
1	31806100	31806400	hypo-methylation	-0.296659
1	31882300	31882600	hypo-methylation	-0.296133
1	32024300	32024500	hypo-methylation	-0.35739
1	32024600	32024900	hypo-methylation	-0.434582
1	32052800	32053600	hypo-methylation	-0.325659
1	32085600	32085900	hypo-methylation	-0.292368
1	32086000	32086100	hypo-methylation	-0.284993
1	32182900	32183700	hypo-methylation	-0.328844
1	32198700	32199200	hypo-methylation	-0.284806
1	32240600	32241000	hypo-methylation	-0.421904
1	32459800	32460300	hypo-methylation	-0.367017
1	32496900	32497300	hypo-methylation	-0.418066
1	32551000	32551300	hypo-methylation	-0.548252
1	32551400	32551500	hypo-methylation	-0.550396
1	32605500	32606000	hypo-methylation	-0.498189
1	32607300	32607700	hypo-methylation	-0.372178
1	32689200	32689500	hypo-methylation	-0.417256
1	32691000	32691500	hypo-methylation	-0.46255
1	32691700	32691800	hypo-methylation	-0.426563
1	32750200	32750500	hypo-methylation	-0.270962
1	32766600	32767000	hypo-methylation	-0.332673
1	32785000	32785500	hypo-methylation	-0.286245
1	32936600	32937000	hypo-methylation	-0.295532
1	32937400	32937700	hypo-methylation	-0.28977
1	33158500	33159200	hypo-methylation	-0.395251
1	33160500	33160800	hypo-methylation	-0.262433
1	33160900	33161400	hypo-methylation	-0.308074
1	33166300	33167000	hypo-methylation	-0.425681
1	33292600	33292900	hypo-methylation	-0.268655
1	33404000	33404500	hypo-methylation	-0.28559
1	33508500	33508800	hypo-methylation	-0.362321
1	33729800	33730000	hypo-methylation	-0.39342
1	33754400	33754900	hypo-methylation	-0.395733
1	33760900	33761400	hypo-methylation	-0.311913
1	33833100	33833500	hypo-methylation	-0.303138
1	33946200	33946400	hyper-methylation	0.31698
1	33965600	33965900	hypo-methylation	-0.378051
1	33965600	33965900	hypo-methylation	-0.38822
1	34181600	34181800	hypo-methylation	-0.356857
1	34360800	34361200	hypo-methylation	-0.368275
1	34371100	34371300	hypo-methylation	-0.356955
1	34371400	34372400	hypo-methylation	-0.35228
1	34447100	34447500	hypo-methylation	-0.426538
1	34541100	34541400	hypo-methylation	-0.311075
1	34578200	34578500	hypo-methylation	-0.366135
1	34724000	34724200	hypo-methylation	-0.293129
1	34972000	34972300	hypo-methylation	-0.27457
1	34973000	34973300	hypo-methylation	-0.294727
1	34974600	34975200	hypo-methylation	-0.36333
1	35024100	35024200	hypo-methylation	-0.311939
1	35025000	35025500	hypo-methylation	-0.300725
1	35133900	35134200	hypo-methylation	-0.343641
1	35366900	35367800	hypo-methylation	-0.297631
1	35368600	35369000	hypo-methylation	-0.249265
1	35461900	35462200	hypo-methylation	-0.303872
1	35494000	35494300	hypo-methylation	-0.349712
1	35589200	35589700	hypo-methylation	-0.29301
1	35794500	35795000	hypo-methylation	-0.448917
1	35807500	35807700	hypo-methylation	-0.254752
1	35842400	35842900	hypo-methylation	-0.363394
1	35866000	35866100	hypo-methylation	-0.305441
1	35896100	35896600	hypo-methylation	-0.364759
1	35993400	35993700	hypo-methylation	-0.404079
1	36051800	36052600	hypo-methylation	-0.400929
1	36154100	36155000	hypo-methylation	-0.390842
1	36244100	36244300	hyper-methylation	0.2529
1	36277800	36278100	hypo-methylation	-0.36315
1	36340300	36340800	hypo-methylation	-0.573198
1	36349100	36349600	hypo-methylation	-0.352667
1	36351900	36352200	hypo-methylation	-0.275175
1	36425300	36425600	hypo-methylation	-0.262613
1	36471200	36471300	hypo-methylation	-0.338909
1	36739200	36740700	hypo-methylation	-0.535296
1	36801900	36802200	hypo-methylation	-0.308304
1	36862100	36862600	hypo-methylation	-0.374679
1	36875500	36875900	hypo-methylation	-0.575339
1	36933900	36934400	hypo-methylation	-0.495456
1	37014300	37014600	hypo-methylation	-0.483741
1	37014700	37015200	hypo-methylation	-0.485569
1	37159400	37159900	hypo-methylation	-0.409722
1	37288500	37288900	hypo-methylation	-0.27605
1	37337400	37337800	hypo-methylation	-0.397562
1	37401500	37402000	hypo-methylation	-0.334337
1	37542800	37543100	hypo-methylation	-0.294964
1	37593900	37594100	hypo-methylation	-0.300104
1	37794100	37794500	hypo-methylation	-0.395735
1	37862900	37863200	hypo-methylation	-0.305442
1	37863400	37863700	hypo-methylation	-0.315346
1	37960100	37960200	hypo-methylation	-0.232946
1	37992800	37993100	hypo-methylation	-0.370417
1	38294700	38295200	hypo-methylation	-0.313898
1	38335300	38337500	hypo-methylation	-0.60266
1	38337600	38338000	hypo-methylation	-0.566891
1	38343700	38343900	hypo-methylation	-0.31608
1	38381700	38382000	hypo-methylation	-0.266405
1	38419700	38420000	hyper-methylation	0.248138
1	38888300	38888500	hypo-methylation	-0.279521
1	38951600	38952100	hypo-methylation	-0.487404
1	38966700	38967000	hypo-methylation	-0.378644
1	39110300	39110500	hypo-methylation	-0.31919
1	39113900	39114000	hypo-methylation	-0.31106
1	39120700	39121300	hypo-methylation	-0.349924
1	39122500	39123000	hypo-methylation	-0.367624
1	39123200	39124100	hypo-methylation	-0.329802
1	39124300	39124600	hypo-methylation	-0.301245
1	39126500	39126700	hypo-methylation	-0.329769
1	39607000	39607500	hypo-methylation	-0.485801
1	39623100	39623600	hypo-methylation	-0.409689
1	39764700	39765000	hyper-methylation	0.241565
1	39805300	39805800	hypo-methylation	-0.446685
1	39842500	39842800	hypo-methylation	-0.368244
1	39842900	39843100	hypo-methylation	-0.420932
1	40173900	40174600	hypo-methylation	-0.320643
1	40345600	40345800	hypo-methylation	-0.355502
1	40345900	40346000	hypo-methylation	-0.423436
1	40346200	40347000	hypo-methylation	-0.484032
1	40347400	40347800	hypo-methylation	-0.560481
1	40348500	40349300	hypo-methylation	-0.572074
1	40349700	40350200	hypo-methylation	-0.420068
1	40350600	40351600	hypo-methylation	-0.67934
1	40351800	40353500	hypo-methylation	-0.593298
1	40356400	40356700	hypo-methylation	-0.587522
1	40357700	40358600	hypo-methylation	-0.474127
1	40359900	40360400	hypo-methylation	-0.574468
1	40361000	40361400	hypo-methylation	-0.526125
1	40437200	40437700	hypo-methylation	-0.470065
1	40500200	40500500	hypo-methylation	-0.269502
1	40542800	40542900	hypo-methylation	-0.390875
1	40543800	40544500	hypo-methylation	-0.357071
1	40544700	40544800	hypo-methylation	-0.386109
1	40545900	40546300	hypo-methylation	-0.55205
1	40546400	40547600	hypo-methylation	-0.594882
1	40548400	40548800	hypo-methylation	-0.45625
1	40550500	40551200	hypo-methylation	-0.704313
1	40887700	40888300	hypo-methylation	-0.348635
1	40896700	40897100	hypo-methylation	-0.418737
1	41073500	41073800	hypo-methylation	-0.359113
1	41122800	41123100	hypo-methylation	-0.321144
1	41705900	41706200	hypo-methylation	-0.3039
1	41761700	41762300	hypo-methylation	-0.400867
1	42040600	42041100	hypo-methylation	-0.296129
1	42056900	42057700	hypo-methylation	-0.42586
1	42208200	42208600	hypo-methylation	-0.312108
1	42229000	42229300	hyper-methylation	0.263733
1	42475000	42475500	hypo-methylation	-0.35185
1	42475600	42475800	hypo-methylation	-0.357684
1	42476700	42477300	hypo-methylation	-0.46078
1	42492700	42493200	hypo-methylation	-0.34376
1	42570000	42570500	hypo-methylation	-0.318314
1	42570900	42572400	hypo-methylation	-0.350553
1	42572700	42573200	hypo-methylation	-0.298372
1	42574000	42574400	hypo-methylation	-0.393537
1	42883400	42883800	hypo-methylation	-0.357712
1	43109000	43109500	hypo-methylation	-0.3566
1	43215900	43216300	hypo-methylation	-0.293293
2	170900	171300	hypo-methylation	-0.362742
2	225400	225900	hypo-methylation	-0.315573
2	461900	462300	hypo-methylation	-0.306412
2	468800	469400	hypo-methylation	-0.453022
2	517800	518400	hypo-methylation	-0.446618
2	519300	519600	hyper-methylation	0.264035
2	613500	613800	hypo-methylation	-0.285896
2	762900	763000	hypo-methylation	-0.306526
2	848000	848300	hypo-methylation	-0.302361
2	849100	849800	hypo-methylation	-0.348345
2	1007200	1007800	hypo-methylation	-0.450801
2	1537600	1538200	hypo-methylation	-0.381984
2	1966900	1967400	hypo-methylation	-0.476984
2	2134100	2134500	hyper-methylation	0.242075
2	2144700	2145200	hypo-methylation	-0.467011
2	2250500	2250800	hypo-methylation	-0.274218
2	2451300	2451600	hypo-methylation	-0.316844
2	2489900	2490500	hypo-methylation	-0.450485
2	2672100	2672400	hypo-methylation	-0.364587
2	3041300	3041500	hypo-methylation	-0.355243
2	3296200	3296600	hypo-methylation	-0.436364
2	3330500	3330800	hypo-methylation	-0.440937
2	3465700	3465900	hypo-methylation	-0.312366
2	3726000	3726500	hypo-methylation	-0.469062
2	3763900	3764100	hypo-methylation	-0.38795
2	3766100	3766300	hypo-methylation	-0.415216
2	3780400	3780800	hyper-methylation	0.277075
2	3789000	3789500	hyper-methylation	0.357225
2	3841300	3841400	hypo-methylation	-0.292863
2	3984200	3984300	hypo-methylation	-0.481051
2	3984400	3984800	hypo-methylation	-0.418234
2	4428300	4428700	hypo-methylation	-0.393674
2	4430500	4430600	hypo-methylation	-0.275
2	4595900	4596100	hypo-methylation	-0.28455
2	4766700	4767000	hypo-methylation	-0.36202
2	4770600	4770900	hypo-methylation	-0.375004
2	4874600	4874700	hypo-methylation	-0.301091
2	4878700	4878900	hypo-methylation	-0.324294
2	4879400	4879700	hypo-methylation	-0.43775
2	4881800	4882300	hypo-methylation	-0.329603
2	4932200	4932400	hypo-methylation	-0.351006
2	4960700	4961200	hypo-methylation	-0.465587
2	5076100	5076300	hypo-methylation	-0.332935
2	5108100	5108200	hyper-methylation	0.283131
2	5129800	5130000	hypo-methylation	-0.24255
2	5134900	5135000	hypo-methylation	-0.508161
2	5135200	5137800	hypo-methylation	-0.610348
2	5296400	5297000	hypo-methylation	-0.423764
2	5337800	5338100	hypo-methylation	-0.347993
2	5363100	5363400	hypo-methylation	-0.260989
2	5440200	5440500	hypo-methylation	-0.459855
2	5475800	5476600	hypo-methylation	-0.351125
2	5481800	5482600	hypo-methylation	-0.40179
2	5571900	5572400	hypo-methylation	-0.350177
2	5632000	5632400	hypo-methylation	-0.396896
2	5703100	5703700	hypo-methylation	-0.428112
2	5742900	5743000	hypo-methylation	-0.393952
2	5743300	5744300	hypo-methylation	-0.455158
2	5897700	5897800	hypo-methylation	-0.319196
2	5937400	5937700	hypo-methylation	-0.282339
2	5939800	5940300	hypo-methylation	-0.459087
2	6006100	6006500	hypo-methylation	-0.279609
2	6010800	6011100	hypo-methylation	-0.302181
2	6011300	6011500	hypo-methylation	-0.31143
2	6020600	6020800	hypo-methylation	-0.250969
2	6060900	6061600	hypo-methylation	-0.397135
2	6104600	6105600	hypo-methylation	-0.502722
2	6105900	6106300	hypo-methylation	-0.364731
2	6107700	6108100	hypo-methylation	-0.315612
2	6170800	6171200	hypo-methylation	-0.367493
2	6289300	6289900	hypo-methylation	-0.354174
2	6395700	6396100	hypo-methylation	-0.341268
2	6578300	6578800	hyper-methylation	0.359892
2	6595300	6595600	hypo-methylation	-0.385792
2	6615400	6616000	hypo-methylation	-0.416654
2	6689200	6689800	hypo-methylation	-0.391265
2	6691300	6691500	hypo-methylation	-0.366282
2	6721400	6721700	hypo-methylation	-0.297896
2	6767700	6768000	hypo-methylation	-0.364665
2	6772300	6772500	hypo-methylation	-0.392259
2	6772700	6773000	hypo-methylation	-0.40407
2	6773200	6776300	hypo-methylation	-0.44614
2	6776600	6778100	hypo-methylation	-0.339059
2	6906400	6906500	hyper-methylation	0.435496
2	6960200	6960800	hypo-methylation	-0.390899
2	6977600	6978000	hypo-methylation	-0.455325
2	6978700	6979300	hypo-methylation	-0.547261
2	7037000	7037600	hypo-methylation	-0.323263
2	7139500	7140000	hypo-methylation	-0.542901
2	7299900	7300000	hypo-methylation	-0.362242
2	7374300	7374500	hypo-methylation	-0.275415
2	7427300	7427400	hypo-methylation	-0.320093
2	7457600	7457700	hyper-methylation	0.376737
2	7473200	7474100	hypo-methylation	-0.389373
2	7489300	7489800	hypo-methylation	-0.352541
2	7490200	7490600	hypo-methylation	-0.407996
2	7524800	7525100	hypo-methylation	-0.288068
2	7608000	7608300	hypo-methylation	-0.239875
2	7635600	7635900	hypo-methylation	-0.38203
2	7637700	7637800	hypo-methylation	-0.283731
2	7642900	7643200	hypo-methylation	-0.380863
2	7683800	7684200	hypo-methylation	-0.300845
2	7742400	7742600	hyper-methylation	0.286863
2	7756400	7757100	hypo-methylation	-0.337349
2	7778300	7778400	hypo-methylation	-0.287208
2	7778500	7778800	hypo-methylation	-0.3045
2	7933300	7933500	hyper-methylation	0.267417
2	8003000	8003300	hypo-methylation	-0.330805
2	8193000	8193300	hypo-methylation	-0.289186
2	8267800	8268000	hypo-methylation	-0.262054
2	8344600	8344800	hypo-methylation	-0.283946
2	8345800	8346100	hypo-methylation	-0.274671
2	8346700	8347800	hypo-methylation	-0.308755
2	8348100	8348900	hypo-methylation	-0.508359
2	8352300	8352600	hypo-methylation	-0.435578
2	8402300	8402500	hypo-methylation	-0.287135
2	8402700	8403100	hypo-methylation	-0.344865
2	8406800	8407100	hypo-methylation	-0.305995
2	8407400	8407800	hypo-methylation	-0.288367
2	8433400	8433700	hypo-methylation	-0.280639
2	8433900	8434000	hypo-methylation	-0.367287
2	8434500	8435100	hypo-methylation	-0.3596
2	8607000	8607500	hypo-methylation	-0.334136
2	8756500	8757000	hypo-methylation	-0.450221
2	8759100	8759400	hypo-methylation	-0.331112
2	8807200	8807600	hypo-methylation	-0.297868
2	8909400	8909600	hypo-methylation	-0.338028
2	8924800	8925100	hypo-methylation	-0.3192
2	8992700	8993100	hypo-methylation	-0.303638
2	9007900	9008200	hypo-methylation	-0.525508
2	9008400	9008700	hypo-methylation	-0.384147
2	9009600	9010800	hypo-methylation	-0.438519
2	9041500	9041800	hypo-methylation	-0.3369
2	9049000	9049500	hypo-methylation	-0.428945
2	9399200	9399400	hypo-methylation	-0.33315
2	9469500	9470000	hypo-methylation	-0.358405
2	9522700	9523200	hypo-methylation	-0.463693
2	9542900	9544000	hypo-methylation	-0.434179
2	9873000	9873100	hypo-methylation	-0.42257
2	9874600	9875200	hypo-methylation	-0.380494
2	9901400	9901900	hypo-methylation	-0.41379
2	10061800	10062200	hypo-methylation	-0.313121
2	10128200	10128500	hypo-methylation	-0.278265
2	10128700	10129100	hypo-methylation	-0.28094
2	10137300	10137500	hypo-methylation	-0.366142
2	10137700	10138300	hypo-methylation	-0.363519
2	10170400	10170900	hypo-methylation	-0.391273
2	10172000	10172100	hyper-methylation	0.284325
2	10178700	10178900	hypo-methylation	-0.314655
2	10290800	10290900	hyper-methylation	0.2722
2	10291000	10291100	hyper-methylation	0.2437
2	10354800	10355500	hypo-methylation	-0.402141
2	10496000	10497000	hypo-methylation	-0.352973
2	10497800	10498100	hypo-methylation	-0.279415
2	10562800	10563200	hypo-methylation	-0.395971
2	10563500	10563800	hypo-methylation	-0.363958
2	10631100	10631600	hypo-methylation	-0.309759
2	10785600	10785800	hypo-methylation	-0.354749
2	10786100	10786300	hypo-methylation	-0.352098
2	10789500	10790100	hypo-methylation	-0.396577
2	10820600	10820900	hypo-methylation	-0.337153
2	10821500	10821700	hypo-methylation	-0.344155
2	10851100	10851500	hypo-methylation	-0.397227
2	10851600	10851800	hypo-methylation	-0.371634
2	10869600	10869900	hypo-methylation	-0.385441
2	11111000	11112000	hypo-methylation	-0.536998
2	11114900	11115200	hypo-methylation	-0.402358
2	11194000	11195100	hypo-methylation	-0.559589
2	11195200	11195800	hypo-methylation	-0.493722
2	11265500	11266100	hypo-methylation	-0.341897
2	11267000	11267700	hypo-methylation	-0.319439
2	11397100	11397600	hypo-methylation	-0.3296
2	11404700	11405500	hypo-methylation	-0.356376
2	11405600	11405900	hypo-methylation	-0.323836
2	11406300	11406400	hypo-methylation	-0.335222
2	11447900	11448100	hypo-methylation	-0.366966
2	11449700	11450200	hypo-methylation	-0.402008
2	11464000	11464400	hypo-methylation	-0.39642
2	11507600	11507800	hypo-methylation	-0.449993
2	11643100	11643400	hypo-methylation	-0.328494
2	11689800	11690100	hypo-methylation	-0.237805
2	11691900	11692500	hypo-methylation	-0.286757
2	11708500	11709100	hyper-methylation	0.305855
2	11867100	11867700	hypo-methylation	-0.306161
2	12035100	12036200	hypo-methylation	-0.428947
2	12036500	12036700	hypo-methylation	-0.42025
2	12041200	12042200	hypo-methylation	-0.369849
2	12047600	12048200	hypo-methylation	-0.317671
2	12066900	12067200	hypo-methylation	-0.315063
2	12068100	12068300	hypo-methylation	-0.320508
2	12068400	12068600	hypo-methylation	-0.316879
2	12098900	12099200	hypo-methylation	-0.273391
2	12100900	12101000	hypo-methylation	-0.332107
2	12101600	12102600	hypo-methylation	-0.360619
2	12211900	12212200	hypo-methylation	-0.341071
2	12230900	12231000	hyper-methylation	0.276662
2	12267400	12267700	hypo-methylation	-0.290499
2	12354900	12355900	hypo-methylation	-0.347676
2	12358000	12358100	hypo-methylation	-0.284863
2	12360900	12361700	hypo-methylation	-0.396315
2	12396100	12396500	hypo-methylation	-0.470985
2	12397000	12397400	hypo-methylation	-0.315556
2	12423300	12423500	hypo-methylation	-0.290863
2	12423800	12424000	hypo-methylation	-0.291205
2	12426200	12426400	hypo-methylation	-0.307099
2	12429000	12429200	hypo-methylation	-0.282033
2	12488900	12489000	hypo-methylation	-0.291586
2	12527200	12527300	hyper-methylation	0.275413
2	12537900	12538100	hypo-methylation	-0.337271
2	12541000	12541300	hypo-methylation	-0.292029
2	12568200	12568700	hypo-methylation	-0.347191
2	12604400	12605700	hypo-methylation	-0.460716
2	12605900	12606900	hypo-methylation	-0.387069
2	12607200	12608000	hypo-methylation	-0.395602
2	12626700	12627500	hypo-methylation	-0.443611
2	12627600	12628000	hypo-methylation	-0.383415
2	12628100	12628700	hypo-methylation	-0.393246
2	12668300	12668700	hypo-methylation	-0.311996
2	12673900	12674100	hypo-methylation	-0.300379
2	12674900	12675200	hypo-methylation	-0.341083
2	12675800	12676300	hypo-methylation	-0.319955
2	12719700	12720200	hypo-methylation	-0.370975
2	12730200	12730800	hypo-methylation	-0.312048
2	12854000	12854200	hypo-methylation	-0.287813
2	12934500	12934600	hypo-methylation	-0.40127
2	12934700	12935400	hypo-methylation	-0.399915
2	12964900	12965200	hypo-methylation	-0.358097
2	13005400	13006000	hypo-methylation	-0.503341
2	13017700	13018300	hypo-methylation	-0.405749
2	13026100	13026400	hypo-methylation	-0.320704
2	13053400	13053700	hypo-methylation	-0.310987
2	13133700	13133800	hypo-methylation	-0.296815
2	13143000	13143500	hypo-methylation	-0.491757
2	13191600	13192100	hypo-methylation	-0.355652
2	13192300	13192700	hypo-methylation	-0.268713
2	13196000	13196700	hypo-methylation	-0.502995
2	13267600	13267700	hyper-methylation	0.277985
2	13294200	13294400	hypo-methylation	-0.2437
2	13411100	13411300	hypo-methylation	-0.238967
2	13416300	13416500	hypo-methylation	-0.345158
2	13528200	13528400	hyper-methylation	0.295965
2	13607500	13607800	hypo-methylation	-0.322688
2	13767100	13767700	hypo-methylation	-0.3689
2	13877100	13877500	hypo-methylation	-0.348189
2	13883800	13884300	hypo-methylation	-0.306335
2	13987700	13988000	hypo-methylation	-0.476986
2	13994600	13995100	hypo-methylation	-0.412
2	14005600	14006000	hypo-methylation	-0.453918
2	14009600	14009700	hypo-methylation	-0.367825
2	14025300	14025600	hypo-methylation	-0.487544
2	14029200	14029500	hypo-methylation	-0.309619
2	14050000	14050500	hypo-methylation	-0.360538
2	14077300	14077600	hyper-methylation	0.257679
2	14340500	14340800	hypo-methylation	-0.2864
2	14341800	14343400	hypo-methylation	-0.393278
2	14343600	14344400	hypo-methylation	-0.341809
2	14344800	14345500	hypo-methylation	-0.352651
2	14345600	14347000	hypo-methylation	-0.367106
2	14353800	14354100	hyper-methylation	0.267035
2	14556200	14556300	hypo-methylation	-0.343039
2	14556400	14556700	hypo-methylation	-0.382456
2	14675100	14675300	hypo-methylation	-0.274732
2	14705800	14706000	hyper-methylation	0.247385
2	14713700	14714000	hypo-methylation	-0.34085
2	14714500	14714800	hypo-methylation	-0.32245
2	14716300	14716700	hypo-methylation	-0.298014
2	14716800	14717000	hypo-methylation	-0.294355
2	14727600	14728300	hypo-methylation	-0.391662
2	14741900	14742400	hypo-methylation	-0.322757
2	14742600	14742800	hypo-methylation	-0.313678
2	14748600	14749100	hypo-methylation	-0.320108
2	14751900	14752300	hypo-methylation	-0.297248
2	14753200	14753500	hypo-methylation	-0.3206
2	14772600	14773000	hyper-methylation	0.259226
2	14857900	14858400	hypo-methylation	-0.334595
2	14858500	14858900	hypo-methylation	-0.349988
2	14859000	14859400	hypo-methylation	-0.298922
2	14870000	14870100	hypo-methylation	-0.328607
2	14871400	14871900	hypo-methylation	-0.422606
2	14976700	14977400	hypo-methylation	-0.393944
2	14988700	14988900	hypo-methylation	-0.299412
2	14991900	14992200	hypo-methylation	-0.444827
2	14992300	14992800	hypo-methylation	-0.408536
2	14996300	14996600	hypo-methylation	-0.307749
2	14997800	14998500	hypo-methylation	-0.480366
2	15011600	15012100	hypo-methylation	-0.319821
2	15012300	15012800	hypo-methylation	-0.329727
2	15029600	15029700	hyper-methylation	0.269937
2	15040400	15040500	hypo-methylation	-0.243859
2	15058500	15058700	hypo-methylation	-0.31274
2	15066000	15066100	hyper-methylation	0.258336
2	15071300	15071600	hyper-methylation	0.260622
2	15108300	15108500	hypo-methylation	-0.253637
2	15128000	15128300	hypo-methylation	-0.316806
2	15128700	15129300	hypo-methylation	-0.383227
2	15129900	15130200	hypo-methylation	-0.331007
2	15130800	15131000	hypo-methylation	-0.345434
2	15151400	15152200	hypo-methylation	-0.302701
2	15215000	15215300	hypo-methylation	-0.323519
2	15215500	15216200	hypo-methylation	-0.345434
2	15295100	15295200	hyper-methylation	0.2462
2	15362400	15362800	hypo-methylation	-0.400797
2	15395800	15396100	hypo-methylation	-0.266841
2	15463900	15464100	hypo-methylation	-0.455077
2	15481700	15482000	hypo-methylation	-0.491994
2	15492700	15492900	hypo-methylation	-0.479531
2	15493000	15493100	hypo-methylation	-0.456265
2	15575700	15576100	hypo-methylation	-0.338933
2	15622300	15622500	hypo-methylation	-0.34885
2	15622600	15623400	hypo-methylation	-0.349052
2	15656100	15656600	hypo-methylation	-0.356189
2	15693000	15693500	hypo-methylation	-0.42605
2	15709500	15710100	hypo-methylation	-0.309851
2	15747000	15747200	hypo-methylation	-0.296743
2	15796300	15796600	hypo-methylation	-0.367487
2	15804000	15804400	hypo-methylation	-0.337589
2	15834100	15834400	hypo-methylation	-0.356287
2	15834800	15835300	hypo-methylation	-0.655631
2	15920200	15921100	hypo-methylation	-0.375561
2	15922700	15923000	hypo-methylation	-0.305793
2	15924800	15925100	hypo-methylation	-0.389144
2	15980500	15981400	hypo-methylation	-0.450336
2	16068800	16069100	hypo-methylation	-0.300442
2	16159900	16160000	hypo-methylation	-0.284206
2	16160100	16160400	hypo-methylation	-0.286285
2	16188500	16188900	hypo-methylation	-0.345472
2	16189200	16189700	hypo-methylation	-0.27843
2	16253000	16253300	hypo-methylation	-0.30529
2	16257800	16258300	hypo-methylation	-0.369729
2	16258500	16258800	hypo-methylation	-0.33322
2	16272100	16272600	hypo-methylation	-0.3427
2	16277500	16277800	hypo-methylation	-0.31445
2	16312600	16313100	hypo-methylation	-0.304076
2	16325800	16326500	hypo-methylation	-0.359078
2	16341300	16341700	hypo-methylation	-0.285
2	16404400	16405100	hypo-methylation	-0.28574
2	16415000	16415200	hypo-methylation	-0.283577
2	16443400	16444000	hypo-methylation	-0.35677
2	16498900	16499100	hypo-methylation	-0.416621
2	16502500	16503500	hypo-methylation	-0.483256
2	16535200	16535300	hypo-methylation	-0.338967
2	16546700	16546900	hypo-methylation	-0.299766
2	16561600	16561900	hypo-methylation	-0.323199
2	16562900	16563300	hypo-methylation	-0.273663
2	16567200	16567500	hypo-methylation	-0.251536
2	16615200	16615500	hypo-methylation	-0.262223
2	16624500	16624800	hypo-methylation	-0.301014
2	16624900	16625200	hypo-methylation	-0.347735
2	16634000	16634400	hypo-methylation	-0.446561
2	16634500	16634700	hypo-methylation	-0.444961
2	16689900	16690200	hypo-methylation	-0.242308
2	16841100	16841300	hyper-methylation	0.23387
2	16915800	16916200	hypo-methylation	-0.423548
2	16917000	16917300	hyper-methylation	0.284599
2	16960100	16962400	hypo-methylation	-0.473873
2	17116600	17116700	hypo-methylation	-0.456248
2	17116800	17117100	hypo-methylation	-0.358556
2	17149000	17149300	hypo-methylation	-0.288747
2	17164200	17164500	hypo-methylation	-0.269029
2	17170000	17170100	hypo-methylation	-0.302968
2	17171400	17172000	hypo-methylation	-0.367781
2	17172300	17172900	hypo-methylation	-0.309979
2	17214700	17215200	hypo-methylation	-0.338139
2	17266600	17267000	hypo-methylation	-0.245821
2	17337100	17337200	hypo-methylation	-0.421677
2	17350100	17350500	hypo-methylation	-0.349994
2	17351000	17352200	hyper-methylation	0.344817
2	17371200	17371700	hypo-methylation	-0.375391
2	17414300	17414900	hypo-methylation	-0.263665
2	17458400	17458600	hypo-methylation	-0.305557
2	17460800	17461100	hypo-methylation	-0.308045
2	17473900	17474300	hypo-methylation	-0.367497
2	17479800	17480500	hypo-methylation	-0.406857
2	17557600	17558300	hypo-methylation	-0.399027
2	17567400	17568100	hypo-methylation	-0.371812
2	18076000	18076100	hypo-methylation	-0.303716
2	18108900	18109200	hypo-methylation	-0.346387
2	18338000	18339200	hypo-methylation	-0.372426
2	18341900	18342400	hypo-methylation	-0.397405
2	18442900	18443100	hypo-methylation	-0.327708
2	18468900	18469300	hyper-methylation	0.312734
2	18477800	18478000	hypo-methylation	-0.254136
2	18485500	18485800	hypo-methylation	-0.32394
2	18486000	18486700	hypo-methylation	-0.388034
2	18530300	18530400	hypo-methylation	-0.494486
2	18548500	18550000	hypo-methylation	-0.381661
2	18551700	18552100	hypo-methylation	-0.329897
2	18552300	18552600	hypo-methylation	-0.332847
2	18557100	18557400	hypo-methylation	-0.282764
2	18603800	18604300	hypo-methylation	-0.258908
2	18628100	18628600	hypo-methylation	-0.286548
2	18642200	18642900	hypo-methylation	-0.308916
2	18728900	18729300	hypo-methylation	-0.394929
2	18833600	18834100	hypo-methylation	-0.379366
2	18836300	18836600	hypo-methylation	-0.292206
2	18855300	18855400	hypo-methylation	-0.268571
2	18866100	18866400	hypo-methylation	-0.250173
2	18900600	18901400	hypo-methylation	-0.382483
2	19026000	19026500	hypo-methylation	-0.4941
2	19032900	19033400	hyper-methylation	0.275424
2	19033800	19034000	hyper-methylation	0.368277
2	19045100	19047000	hypo-methylation	-0.376719
2	19048700	19049200	hypo-methylation	-0.35738
2	19107500	19108300	hypo-methylation	-0.378037
2	19320100	19320400	hypo-methylation	-0.26495
2	19334100	19334700	hypo-methylation	-0.503771
2	19348300	19348600	hypo-methylation	-0.272596
2	19424300	19424700	hypo-methylation	-0.352612
2	19436600	19436900	hypo-methylation	-0.316063
2	19459300	19459600	hypo-methylation	-0.279458
2	19465700	19466000	hypo-methylation	-0.272175
2	19616400	19616700	hypo-methylation	-0.336483
2	19642100	19642700	hypo-methylation	-0.372737
2	19815300	19815600	hypo-methylation	-0.31709
2	19833600	19833900	hypo-methylation	-0.290475
2	19937700	19938600	hypo-methylation	-0.36754
2	19938900	19939100	hypo-methylation	-0.259532
2	19941100	19941600	hypo-methylation	-0.300109
2	20024700	20024900	hypo-methylation	-0.347047
2	20037100	20037500	hypo-methylation	-0.274804
2	20102400	20102700	hypo-methylation	-0.342367
2	20103000	20103300	hypo-methylation	-0.370542
2	20130800	20131200	hypo-methylation	-0.393881
2	20146900	20147800	hypo-methylation	-0.451488
2	20373900	20374200	hyper-methylation	0.358494
2	20417200	20417600	hypo-methylation	-0.27056
2	20564100	20564400	hypo-methylation	-0.263883
2	20585600	20585700	hypo-methylation	-0.383556
2	20585900	20586000	hypo-methylation	-0.391106
2	20591300	20591600	hypo-methylation	-0.29406
2	20598300	20598800	hypo-methylation	-0.318566
2	20629800	20630200	hypo-methylation	-0.297202
2	20667500	20668000	hypo-methylation	-0.3467
2	20668100	20668200	hypo-methylation	-0.343575
2	20714100	20714600	hypo-methylation	-0.3288
2	20745100	20745500	hypo-methylation	-0.41865
2	20768100	20768600	hypo-methylation	-0.339406
2	20768900	20769600	hypo-methylation	-0.328148
2	20788400	20788700	hypo-methylation	-0.375685
2	20798600	20799400	hypo-methylation	-0.446785
2	20867700	20868000	hypo-methylation	-0.547816
2	20929100	20929600	hypo-methylation	-0.443217
2	20944800	20945100	hypo-methylation	-0.334921
2	21069800	21070300	hypo-methylation	-0.295669
2	21071200	21071300	hypo-methylation	-0.357729
2	21071400	21072100	hypo-methylation	-0.35842
2	21072600	21073400	hypo-methylation	-0.438719
2	21224200	21224600	hypo-methylation	-0.397213
2	21331700	21332100	hypo-methylation	-0.370858
2	21446300	21446600	hyper-methylation	0.349648
2	21452200	21452700	hypo-methylation	-0.5766
2	21478000	21478900	hypo-methylation	-0.461603
2	21482100	21482500	hypo-methylation	-0.247421
2	21505000	21505700	hypo-methylation	-0.419179
2	21542100	21542900	hypo-methylation	-0.352094
2	21575800	21576100	hypo-methylation	-0.320734
2	21594900	21595100	hypo-methylation	-0.314958
2	21644400	21644600	hyper-methylation	0.276093
2	21653800	21653900	hyper-methylation	0.369965
2	21657200	21657500	hypo-methylation	-0.389062
2	21714700	21714800	hypo-methylation	-0.299336
2	21715700	21715900	hypo-methylation	-0.260564
2	21756800	21757100	hypo-methylation	-0.276671
2	21758300	21758800	hyper-methylation	0.307846
2	21915700	21916200	hypo-methylation	-0.525292
2	21939600	21939900	hyper-methylation	0.266979
2	21960400	21960900	hypo-methylation	-0.459614
2	22138700	22139100	hypo-methylation	-0.353183
2	22224500	22224800	hyper-methylation	0.329557
2	22231700	22232200	hypo-methylation	-0.431474
2	22283100	22283200	hypo-methylation	-0.308715
2	22375400	22375700	hypo-methylation	-0.32466
2	22380100	22380600	hypo-methylation	-0.448496
2	22403900	22404400	hypo-methylation	-0.357637
2	22507900	22508100	hypo-methylation	-0.247063
2	22597700	22599000	hypo-methylation	-0.522571
2	22606500	22606900	hypo-methylation	-0.423808
2	22661100	22661200	hypo-methylation	-0.373062
2	23092400	23092700	hypo-methylation	-0.310713
2	23110500	23110900	hypo-methylation	-0.407781
2	23111300	23111500	hypo-methylation	-0.431036
2	23233200	23234000	hypo-methylation	-0.432728
2	23673400	23673800	hypo-methylation	-0.307864
2	23674000	23674300	hypo-methylation	-0.322164
2	23674500	23674600	hypo-methylation	-0.317288
2	23675900	23676200	hypo-methylation	-0.464091
2	23694600	23694700	hypo-methylation	-0.27103
2	23695300	23695600	hypo-methylation	-0.287179
2	23698300	23698500	hypo-methylation	-0.242655
2	23708600	23708800	hypo-methylation	-0.345802
2	23787400	23788100	hypo-methylation	-0.405374
2	23848300	23848400	hypo-methylation	-0.338502
2	23918700	23919000	hypo-methylation	-0.293183
2	23920500	23921700	hypo-methylation	-0.465911
2	23922000	23922300	hypo-methylation	-0.325093
2	23922400	23923200	hypo-methylation	-0.343826
2	23924700	23925800	hypo-methylation	-0.584408
2	23926300	23926800	hypo-methylation	-0.713443
2	23933500	23934000	hypo-methylation	-0.52385
2	23934500	23934900	hypo-methylation	-0.437775
2	24123800	24124200	hypo-methylation	-0.425301
2	24147100	24148100	hypo-methylation	-0.484487
2	24156800	24157200	hypo-methylation	-0.390767
2	24579900	24580400	hypo-methylation	-0.334842
2	24726300	24726600	hypo-methylation	-0.375075
2	24860400	24860700	hypo-methylation	-0.348175
2	24913300	24913700	hypo-methylation	-0.457171
2	25114000	25114300	hypo-methylation	-0.255568
2	25147600	25148300	hypo-methylation	-0.470236
2	25241400	25241800	hypo-methylation	-0.360524
2	25266000	25266200	hyper-methylation	0.263675
2	25519000	25519800	hypo-methylation	-0.338256
2	25544000	25544400	hypo-methylation	-0.404569
2	25544700	25545000	hypo-methylation	-0.241875
2	25575600	25576000	hypo-methylation	-0.346959
2	25692200	25693000	hypo-methylation	-0.541826
2	25748400	25748500	hypo-methylation	-0.28484
2	25821600	25822800	hypo-methylation	-0.558582
2	25847900	25848400	hypo-methylation	-0.383759
2	25961200	25961700	hypo-methylation	-0.288859
2	25985900	25987200	hypo-methylation	-0.411088
2	26110700	26111300	hypo-methylation	-0.519303
2	26214100	26215100	hypo-methylation	-0.43409
2	26361600	26361900	hypo-methylation	-0.281533
2	26363100	26363600	hypo-methylation	-0.320283
2	26518500	26518700	hypo-methylation	-0.320615
2	26685000	26685800	hypo-methylation	-0.293963
2	26685900	26686000	hypo-methylation	-0.292268
2	26686600	26687000	hypo-methylation	-0.290092
2	26687300	26687800	hypo-methylation	-0.404595
2	26783200	26783500	hypo-methylation	-0.300044
2	26927700	26928200	hypo-methylation	-0.418141
2	26945000	26945300	hyper-methylation	0.270317
2	26979900	26980300	hypo-methylation	-0.365663
2	26994200	26995000	hypo-methylation	-0.340359
2	27057600	27058000	hypo-methylation	-0.331554
2	27111400	27111800	hypo-methylation	-0.317519
2	27112900	27113300	hypo-methylation	-0.304167
2	27139600	27140100	hypo-methylation	-0.4096
2	27252200	27252800	hypo-methylation	-0.311798
2	27253900	27254500	hypo-methylation	-0.354002
2	27310100	27310400	hypo-methylation	-0.295385
2	27357400	27358300	hypo-methylation	-0.433953
2	27449200	27449600	hypo-methylation	-0.352745
2	27449700	27450200	hypo-methylation	-0.376872
2	27477500	27478000	hypo-methylation	-0.393605
2	27478500	27479500	hypo-methylation	-0.562947
2	27485300	27485700	hypo-methylation	-0.350988
2	27545900	27546400	hypo-methylation	-0.357358
2	27554100	27554800	hypo-methylation	-0.411566
2	27555300	27555700	hypo-methylation	-0.371691
2	27643500	27643900	hypo-methylation	-0.309615
2	27687200	27687600	hypo-methylation	-0.265929
2	27726000	27726500	hypo-methylation	-0.38041
2	27754600	27754900	hyper-methylation	0.304762
2	27913000	27913800	hypo-methylation	-0.342989
2	27921500	27922100	hypo-methylation	-0.349353
2	27923800	27924200	hypo-methylation	-0.302952
2	27924600	27924800	hypo-methylation	-0.28931
2	28075100	28075400	hypo-methylation	-0.270767
2	28078100	28078400	hypo-methylation	-0.29065
2	28120500	28120800	hypo-methylation	-0.390184
2	28171300	28171800	hypo-methylation	-0.381516
2	28241800	28242200	hypo-methylation	-0.343904
2	28257500	28257800	hypo-methylation	-0.289652
2	28311200	28311700	hypo-methylation	-0.274037
2	28320800	28321300	hypo-methylation	-0.381209
2	28354900	28355400	hypo-methylation	-0.268033
2	28531500	28531700	hypo-methylation	-0.299
2	28531900	28532500	hypo-methylation	-0.468108
2	28543900	28544200	hypo-methylation	-0.29479
2	28776400	28776900	hypo-methylation	-0.28103
2	28907700	28907800	hyper-methylation	0.32101
2	28950500	28950900	hypo-methylation	-0.300855
2	29032700	29032800	hypo-methylation	-0.287969
2	29033100	29033600	hypo-methylation	-0.324742
2	29102000	29102500	hypo-methylation	-0.360712
2	29312100	29312700	hypo-methylation	-0.372609
2	29323600	29324000	hypo-methylation	-0.334846
2	29339800	29340400	hypo-methylation	-0.384727
2	29416000	29416400	hypo-methylation	-0.300532
2	29462100	29462400	hypo-methylation	-0.341283
2	29778500	29779000	hypo-methylation	-0.346156
2	29781300	29781900	hypo-methylation	-0.465152
2	29782300	29782800	hypo-methylation	-0.381429
2	29820700	29821100	hypo-methylation	-0.305507
2	29931400	29931600	hypo-methylation	-0.324306
2	30076800	30077300	hypo-methylation	-0.294816
2	30285700	30286100	hypo-methylation	-0.384421
2	30492800	30493100	hyper-methylation	0.262146
2	30510500	30511000	hypo-methylation	-0.475089
2	30571100	30571400	hypo-methylation	-0.435858
2	30581400	30581900	hypo-methylation	-0.454074
2	30592700	30593100	hypo-methylation	-0.472119
2	30646500	30647000	hypo-methylation	-0.355146
2	30648400	30649700	hypo-methylation	-0.381736
2	31130000	31130500	hypo-methylation	-0.238042
2	31133600	31134000	hypo-methylation	-0.324
2	31134200	31134500	hypo-methylation	-0.310254
2	31134600	31134700	hypo-methylation	-0.360662
2	31240400	31241300	hypo-methylation	-0.372891
2	31293500	31294000	hypo-methylation	-0.539021
2	31294800	31295300	hypo-methylation	-0.454925
2	31295400	31295500	hypo-methylation	-0.405143
2	31596500	31596600	hypo-methylation	-0.284471
2	31658200	31658800	hypo-methylation	-0.383716
2	31790400	31791000	hypo-methylation	-0.322109
2	31801200	31801500	hypo-methylation	-0.404362
2	32036700	32036800	hypo-methylation	-0.344878
2	32036900	32037300	hypo-methylation	-0.33022
2	32334500	32335200	hypo-methylation	-0.35559
2	32336000	32336700	hypo-methylation	-0.341907
2	32382300	32383400	hypo-methylation	-0.488229
2	32582000	32582500	hypo-methylation	-0.438393
2	32782100	32782700	hypo-methylation	-0.379607
2	33048100	33048400	hypo-methylation	-0.319083
2	33048500	33048600	hypo-methylation	-0.448908
2	33157400	33157700	hypo-methylation	-0.50845
2	33160700	33160800	hypo-methylation	-0.366292
2	33177800	33178200	hypo-methylation	-0.33331
2	33189000	33189600	hypo-methylation	-0.357567
2	33398600	33399100	hypo-methylation	-0.305278
2	33417800	33418300	hypo-methylation	-0.342715
2	33418400	33419100	hypo-methylation	-0.339349
2	33419200	33419800	hypo-methylation	-0.354866
2	33420100	33421200	hypo-methylation	-0.374143
2	33422100	33422400	hypo-methylation	-0.225604
2	33484400	33484900	hypo-methylation	-0.368212
2	33487800	33488300	hypo-methylation	-0.356577
2	33488400	33488700	hypo-methylation	-0.322927
2	33520400	33520800	hypo-methylation	-0.309141
2	33552600	33553000	hypo-methylation	-0.367017
2	33615700	33616100	hypo-methylation	-0.375377
2	33616600	33616900	hypo-methylation	-0.474045
2	33698900	33700100	hypo-methylation	-0.484552
2	33784500	33784800	hypo-methylation	-0.295765
2	33815300	33815800	hypo-methylation	-0.412995
2	33824200	33824500	hypo-methylation	-0.225477
2	33982100	33982400	hypo-methylation	-0.310949
2	33986100	33986200	hypo-methylation	-0.516687
2	34066500	34066800	hypo-methylation	-0.30436
2	34162400	34162700	hypo-methylation	-0.308648
2	34166200	34166700	hypo-methylation	-0.278517
2	34324200	34324800	hypo-methylation	-0.345392
2	34344600	34345100	hypo-methylation	-0.396559
2	34643500	34643900	hypo-methylation	-0.409423
2	34682700	34682800	hypo-methylation	-0.307182
2	34682900	34683200	hypo-methylation	-0.315782
2	34692400	34692700	hypo-methylation	-0.356431
2	34952900	34953300	hypo-methylation	-0.469251
2	34973100	34973500	hypo-methylation	-0.322638
2	35025400	35025500	hypo-methylation	-0.276178
2	35185000	35185400	hypo-methylation	-0.294195
2	35419700	35420200	hypo-methylation	-0.345217
2	35818500	35819400	hypo-methylation	-0.480327
2	35893700	35894400	hypo-methylation	-0.398911
3	292100	292600	hypo-methylation	-0.394069
3	339100	339400	hypo-methylation	-0.312204
3	390900	391400	hypo-methylation	-0.342025
3	393100	393600	hypo-methylation	-0.293048
3	394100	394600	hypo-methylation	-0.43113
3	460200	460500	hypo-methylation	-0.311051
3	460600	460900	hypo-methylation	-0.312964
3	601900	602200	hypo-methylation	-0.246844
3	631500	631800	hypo-methylation	-0.305918
3	963400	964000	hypo-methylation	-0.319194
3	1273900	1274200	hypo-methylation	-0.470073
3	1274900	1275600	hypo-methylation	-0.595391
3	1276700	1278200	hypo-methylation	-0.657027
3	1280900	1281400	hypo-methylation	-0.691647
3	1281500	1282100	hypo-methylation	-0.60253
3	1283400	1284000	hypo-methylation	-0.398195
3	1284200	1284700	hypo-methylation	-0.292669
3	1285200	1287900	hypo-methylation	-0.367671
3	1288400	1288900	hypo-methylation	-0.320103
3	1289400	1291000	hypo-methylation	-0.519689
3	1292400	1292700	hypo-methylation	-0.379051
3	1293800	1294200	hypo-methylation	-0.420392
3	1294300	1294800	hypo-methylation	-0.454936
3	1294900	1295400	hypo-methylation	-0.516038
3	1639100	1639600	hypo-methylation	-0.297266
3	1641000	1641500	hypo-methylation	-0.302054
3	1728500	1729200	hypo-methylation	-0.397024
3	2044100	2044300	hyper-methylation	0.296308
3	2117900	2118200	hypo-methylation	-0.361778
3	2183000	2183400	hypo-methylation	-0.291909
3	2365000	2365500	hypo-methylation	-0.330875
3	2480700	2480800	hypo-methylation	-0.359401
3	2641700	2642400	hypo-methylation	-0.34112
3	2643200	2643700	hypo-methylation	-0.342025
3	2716100	2716500	hypo-methylation	-0.373371
3	2716600	2716900	hypo-methylation	-0.349659
3	2878100	2878500	hypo-methylation	-0.441268
3	2972800	2973500	hypo-methylation	-0.471367
3	2974400	2974900	hypo-methylation	-0.505546
3	3248400	3248900	hypo-methylation	-0.430208
3	3595700	3596000	hypo-methylation	-0.373686
3	3597300	3598000	hypo-methylation	-0.314695
3	3613900	3614600	hypo-methylation	-0.427627
3	3652000	3652400	hypo-methylation	-0.377629
3	3721800	3722200	hypo-methylation	-0.397906
3	3807000	3807700	hypo-methylation	-0.279283
3	3810800	3811300	hypo-methylation	-0.331907
3	4078700	4079500	hypo-methylation	-0.4819
3	4107600	4108200	hypo-methylation	-0.616446
3	4213300	4213800	hypo-methylation	-0.395395
3	4320400	4321200	hypo-methylation	-0.401082
3	4455300	4456100	hypo-methylation	-0.382416
3	4460300	4460700	hypo-methylation	-0.31396
3	4461200	4461500	hypo-methylation	-0.362759
3	4462500	4462800	hypo-methylation	-0.38576
3	4466900	4467400	hypo-methylation	-0.432419
3	4692700	4692900	hypo-methylation	-0.378853
3	4714100	4714200	hypo-methylation	-0.529274
3	4714400	4714500	hypo-methylation	-0.50623
3	4714600	4714900	hypo-methylation	-0.419026
3	4920100	4920200	hyper-methylation	0.3095
3	4981300	4981700	hypo-methylation	-0.271458
3	5004000	5004200	hypo-methylation	-0.286755
3	5007800	5008100	hypo-methylation	-0.341041
3	5010000	5010400	hypo-methylation	-0.323616
3	5187300	5187700	hypo-methylation	-0.289327
3	5192500	5192900	hypo-methylation	-0.500591
3	5255800	5256100	hyper-methylation	0.240651
3	5425000	5425500	hypo-methylation	-0.335866
3	5793700	5794200	hypo-methylation	-0.355538
3	5905900	5906300	hypo-methylation	-0.369973
3	5940600	5940900	hypo-methylation	-0.383404
3	6125400	6125600	hypo-methylation	-0.298662
3	6125800	6126500	hypo-methylation	-0.3398
3	6481500	6482000	hypo-methylation	-0.284956
3	6510200	6511000	hypo-methylation	-0.299766
3	6555600	6555900	hypo-methylation	-0.325218
3	6595800	6596200	hypo-methylation	-0.281965
3	6820400	6820900	hypo-methylation	-0.316419
3	6823900	6824100	hypo-methylation	-0.22884
3	6844600	6845300	hypo-methylation	-0.373571
3	6969200	6969500	hypo-methylation	-0.27518
3	6970100	6970600	hypo-methylation	-0.369413
3	6970900	6971100	hypo-methylation	-0.384437
3	7002700	7003100	hypo-methylation	-0.400311
3	7003300	7003400	hypo-methylation	-0.357808
3	7073300	7074300	hypo-methylation	-0.413519
3	7369800	7370300	hypo-methylation	-0.335477
3	7522700	7523000	hypo-methylation	-0.287804
3	7589700	7590000	hypo-methylation	-0.632081
3	7696200	7696300	hypo-methylation	-0.331906
3	7702500	7702800	hypo-methylation	-0.350163
3	7780400	7780700	hypo-methylation	-0.422047
3	7781200	7781600	hypo-methylation	-0.433348
3	7835300	7835500	hypo-methylation	-0.315928
3	7835700	7836000	hypo-methylation	-0.308485
3	7894200	7894400	hypo-methylation	-0.244856
3	7942100	7942800	hypo-methylation	-0.369611
3	7945200	7945700	hypo-methylation	-0.360606
3	7948600	7948900	hypo-methylation	-0.2947
3	7973200	7974100	hypo-methylation	-0.37739
3	8053100	8053400	hypo-methylation	-0.285917
3	8266000	8266200	hypo-methylation	-0.262298
3	8347500	8347800	hypo-methylation	-0.379021
3	8350500	8350700	hypo-methylation	-0.346267
3	8653700	8654000	hypo-methylation	-0.411092
3	8711400	8711800	hypo-methylation	-0.294525
3	8812200	8812600	hypo-methylation	-0.357592
3	8839500	8840100	hypo-methylation	-0.431407
3	8915800	8916200	hypo-methylation	-0.289646
3	9131700	9132300	hypo-methylation	-0.711016
3	9283900	9284100	hypo-methylation	-0.299529
3	9321800	9322200	hypo-methylation	-0.327174
3	9424000	9424800	hypo-methylation	-0.315384
3	9434200	9434700	hypo-methylation	-0.380655
3	9441400	9442300	hypo-methylation	-0.448539
3	9462100	9462400	hypo-methylation	-0.282456
3	9464600	9465400	hypo-methylation	-0.373785
3	9500500	9501000	hypo-methylation	-0.324053
3	9511900	9512100	hypo-methylation	-0.38413
3	9594900	9595100	hypo-methylation	-0.323869
3	9595300	9595600	hypo-methylation	-0.308211
3	9689500	9690100	hypo-methylation	-0.38015
3	9943100	9943800	hypo-methylation	-0.409809
3	9993700	9994300	hypo-methylation	-0.401387
3	10012900	10013900	hypo-methylation	-0.450693
3	10020100	10020900	hypo-methylation	-0.385676
3	10045600	10045900	hypo-methylation	-0.324676
3	10060800	10061300	hypo-methylation	-0.302276
3	10247400	10247600	hypo-methylation	-0.334437
3	10327700	10328000	hypo-methylation	-0.340356
3	10409000	10409100	hypo-methylation	-0.26247
3	10409300	10409700	hypo-methylation	-0.341938
3	10410800	10411100	hypo-methylation	-0.353036
3	10596300	10597000	hypo-methylation	-0.39624
3	10681500	10681700	hypo-methylation	-0.288482
3	10718500	10718900	hypo-methylation	-0.291415
3	10778000	10778200	hyper-methylation	0.290565
3	10937700	10938000	hypo-methylation	-0.373385
3	11016800	11017100	hypo-methylation	-0.246581
3	11018700	11019100	hypo-methylation	-0.367925
3	11019300	11019800	hypo-methylation	-0.379931
3	11045600	11045700	hypo-methylation	-0.376337
3	11046100	11046400	hypo-methylation	-0.338259
3	11100400	11100800	hypo-methylation	-0.285807
3	11138900	11139400	hypo-methylation	-0.464861
3	11190200	11190500	hypo-methylation	-0.435767
3	11191500	11191800	hypo-methylation	-0.31881
3	11198000	11198500	hypo-methylation	-0.520232
3	11323400	11323700	hypo-methylation	-0.27127
3	11363900	11364300	hypo-methylation	-0.301596
3	11435700	11436000	hypo-methylation	-0.292642
3	11482600	11482800	hyper-methylation	0.265107
3	11489100	11489500	hypo-methylation	-0.252054
3	11560200	11560400	hypo-methylation	-0.411006
3	11560700	11561100	hypo-methylation	-0.29509
3	11593600	11593700	hypo-methylation	-0.435685
3	11593800	11594400	hypo-methylation	-0.51791
3	11628600	11628800	hypo-methylation	-0.284633
3	11689600	11689800	hyper-methylation	0.230887
3	11826600	11826900	hypo-methylation	-0.289751
3	11830600	11830900	hypo-methylation	-0.318777
3	12013100	12013200	hypo-methylation	-0.358942
3	12040600	12041100	hypo-methylation	-0.356903
3	12158600	12159100	hypo-methylation	-0.37917
3	12337800	12338100	hypo-methylation	-0.394958
3	12338200	12340000	hypo-methylation	-0.44653
3	12501700	12501800	hypo-methylation	-0.378661
3	12504500	12504800	hypo-methylation	-0.438168
3	12505000	12506000	hypo-methylation	-0.492999
3	12506400	12507000	hypo-methylation	-0.454614
3	12507500	12507900	hypo-methylation	-0.289374
3	12512300	12512400	hypo-methylation	-0.319581
3	12540700	12541000	hypo-methylation	-0.593534
3	12633300	12633500	hypo-methylation	-0.258454
3	12737800	12738000	hypo-methylation	-0.254988
3	12968500	12969000	hypo-methylation	-0.598075
3	13147400	13147600	hypo-methylation	-0.265092
3	13179100	13179500	hypo-methylation	-0.304824
3	13225700	13226500	hypo-methylation	-0.455045
3	13234100	13234600	hypo-methylation	-0.378847
3	13235000	13236000	hypo-methylation	-0.540534
3	13288100	13288400	hypo-methylation	-0.27515
3	13315100	13315300	hypo-methylation	-0.447275
3	13375600	13375900	hyper-methylation	0.316283
3	13643000	13643300	hypo-methylation	-0.360866
3	13646100	13646900	hypo-methylation	-0.319646
3	13647400	13648200	hypo-methylation	-0.429666
3	13649000	13649900	hypo-methylation	-0.541561
3	13657400	13658100	hypo-methylation	-0.415404
3	13658300	13658500	hypo-methylation	-0.307469
3	13772000	13772100	hypo-methylation	-0.394641
3	13772200	13772700	hypo-methylation	-0.373892
3	13790100	13790400	hypo-methylation	-0.349291
3	13829800	13830100	hypo-methylation	-0.373675
3	13906900	13908100	hypo-methylation	-0.427028
3	14004200	14005600	hypo-methylation	-0.435364
3	14022700	14022900	hyper-methylation	0.313909
3	14309900	14310400	hypo-methylation	-0.320277
3	14347500	14347800	hypo-methylation	-0.321554
3	14540300	14541100	hypo-methylation	-0.41156
3	14541300	14541700	hypo-methylation	-0.364971
3	14628800	14628900	hyper-methylation	0.296467
3	14652800	14653500	hypo-methylation	-0.358264
3	14897600	14898100	hypo-methylation	-0.431991
3	14933600	14933800	hypo-methylation	-0.417841
3	14945900	14946400	hypo-methylation	-0.399232
3	15009300	15009800	hypo-methylation	-0.302627
3	15047100	15047700	hypo-methylation	-0.368903
3	15135000	15135300	hypo-methylation	-0.26885
3	15408300	15408800	hypo-methylation	-0.428107
3	15409000	15410000	hypo-methylation	-0.43511
3	15451600	15451900	hypo-methylation	-0.315952
3	15609600	15609900	hypo-methylation	-0.290258
3	15625100	15625900	hypo-methylation	-0.451456
3	15702700	15703300	hypo-methylation	-0.342436
3	15709500	15710000	hypo-methylation	-0.428187
3	15712500	15712900	hypo-methylation	-0.308465
3	15739300	15740000	hypo-methylation	-0.540691
3	15742200	15743300	hypo-methylation	-0.346413
3	15746000	15746500	hypo-methylation	-0.376952
3	15746600	15746800	hypo-methylation	-0.364802
3	15878100	15878700	hypo-methylation	-0.318939
3	15879100	15879400	hypo-methylation	-0.331019
3	15879800	15880100	hypo-methylation	-0.302069
3	15979500	15980100	hypo-methylation	-0.418149
3	16021800	16022200	hypo-methylation	-0.422814
3	16031000	16032100	hypo-methylation	-0.347695
3	16132000	16132600	hypo-methylation	-0.356256
3	16149800	16150900	hypo-methylation	-0.400774
3	16298400	16298900	hypo-methylation	-0.530007
3	16412500	16413000	hypo-methylation	-0.512992
3	16415200	16416000	hypo-methylation	-0.396913
3	16416100	16416500	hypo-methylation	-0.340288
3	16417100	16417800	hypo-methylation	-0.312858
3	16428200	16428500	hyper-methylation	0.25491
3	16444400	16444800	hypo-methylation	-0.336159
3	16561500	16561900	hypo-methylation	-0.298281
3	16579100	16579700	hypo-methylation	-0.380976
3	17037700	17037800	hyper-methylation	0.307542
3	17059200	17059500	hypo-methylation	-0.283716
3	17114400	17114700	hypo-methylation	-0.314632
3	17119100	17119500	hypo-methylation	-0.373903
3	17119700	17120000	hypo-methylation	-0.316503
3	17168500	17169100	hypo-methylation	-0.280433
3	17192500	17192700	hypo-methylation	-0.29802
3	17270500	17270800	hypo-methylation	-0.310775
3	17282500	17282600	hypo-methylation	-0.374221
3	17297000	17297400	hypo-methylation	-0.408419
3	17375800	17376200	hypo-methylation	-0.348432
3	17431700	17432600	hypo-methylation	-0.437052
3	17525000	17525300	hypo-methylation	-0.354113
3	17525500	17526000	hypo-methylation	-0.379598
3	17527300	17527700	hyper-methylation	0.251962
3	17557100	17557400	hypo-methylation	-0.308845
3	17572900	17573200	hypo-methylation	-0.434561
3	17643100	17643400	hypo-methylation	-0.357649
3	17691800	17692700	hypo-methylation	-0.327441
3	17695100	17695400	hypo-methylation	-0.549392
3	17695900	17696800	hypo-methylation	-0.368425
3	17698000	17699700	hypo-methylation	-0.39961
3	17710400	17710800	hypo-methylation	-0.292839
3	17711300	17711800	hypo-methylation	-0.386928
3	17713100	17713600	hypo-methylation	-0.420664
3	17723600	17724000	hypo-methylation	-0.432287
3	17726400	17726600	hypo-methylation	-0.3993
3	17770000	17770500	hypo-methylation	-0.357498
3	17858400	17858900	hypo-methylation	-0.2585
3	17859900	17860300	hypo-methylation	-0.305652
3	17860500	17861000	hypo-methylation	-0.318719
3	17861900	17862200	hypo-methylation	-0.417154
3	17864500	17865300	hypo-methylation	-0.45601
3	17866200	17867300	hypo-methylation	-0.475824
3	17868500	17869000	hypo-methylation	-0.330301
3	17870500	17871100	hypo-methylation	-0.37667
3	17881500	17882000	hypo-methylation	-0.340712
3	17896600	17896800	hypo-methylation	-0.330365
3	17899300	17899600	hypo-methylation	-0.386339
3	18005100	18005500	hypo-methylation	-0.290902
3	18005600	18005700	hypo-methylation	-0.28612
3	18009000	18009100	hypo-methylation	-0.303164
3	18009200	18009700	hypo-methylation	-0.330909
3	18010100	18010500	hypo-methylation	-0.370302
3	18012100	18012400	hypo-methylation	-0.272432
3	18013000	18013100	hypo-methylation	-0.381949
3	18030800	18031000	hypo-methylation	-0.458975
3	18031100	18031600	hypo-methylation	-0.373486
3	18061600	18062200	hyper-methylation	0.301347
3	18077400	18077600	hypo-methylation	-0.314556
3	18077800	18078000	hypo-methylation	-0.286191
3	18081300	18081400	hypo-methylation	-0.302473
3	18081500	18081600	hypo-methylation	-0.325898
3	18102400	18102500	hypo-methylation	-0.261589
3	18102600	18103300	hypo-methylation	-0.292055
3	18178800	18179300	hypo-methylation	-0.357737
3	18187000	18187200	hyper-methylation	0.272991
3	18217600	18218000	hypo-methylation	-0.354437
3	18220000	18220700	hypo-methylation	-0.322744
3	18221400	18221600	hypo-methylation	-0.287243
3	18232600	18232700	hypo-methylation	-0.258825
3	18274000	18274300	hyper-methylation	0.287516
3	18276700	18277000	hyper-methylation	0.282068
3	18278800	18279000	hypo-methylation	-0.2407
3	18279400	18279500	hypo-methylation	-0.242717
3	18280100	18280700	hypo-methylation	-0.384193
3	18283500	18283700	hypo-methylation	-0.322966
3	18467400	18467900	hypo-methylation	-0.374929
3	18545000	18545400	hypo-methylation	-0.29657
3	18547000	18547400	hypo-methylation	-0.309467
3	18558900	18559200	hypo-methylation	-0.270254
3	18560400	18560600	hypo-methylation	-0.246889
3	18560700	18560800	hypo-methylation	-0.266363
3	18560900	18561000	hypo-methylation	-0.285589
3	18561300	18561500	hypo-methylation	-0.294976
3	18561600	18561700	hypo-methylation	-0.335413
3	18689700	18689900	hypo-methylation	-0.262906
3	18690300	18690900	hypo-methylation	-0.280043
3	18691400	18691700	hypo-methylation	-0.305284
3	19009800	19010000	hyper-methylation	0.304196
3	19099000	19099100	hyper-methylation	0.306854
3	19193600	19194100	hypo-methylation	-0.351367
3	19204600	19204900	hypo-methylation	-0.592912
3	19224000	19224400	hypo-methylation	-0.305212
3	19451700	19451800	hyper-methylation	0.264996
3	19527400	19527900	hypo-methylation	-0.401728
3	19605600	19606100	hypo-methylation	-0.37308
3	19636200	19636300	hyper-methylation	0.284791
3	19664000	19664700	hypo-methylation	-0.362932
3	19699100	19699500	hypo-methylation	-0.256605
3	19717900	19718200	hypo-methylation	-0.341284
3	19719000	19719600	hypo-methylation	-0.462811
3	19722600	19723200	hypo-methylation	-0.347369
3	19791900	19792100	hyper-methylation	0.285779
3	19863700	19864000	hypo-methylation	-0.285971
3	19922400	19922500	hypo-methylation	-0.287687
3	19949300	19949600	hypo-methylation	-0.356071
3	20128100	20128200	hypo-methylation	-0.321238
3	20128300	20128900	hypo-methylation	-0.297684
3	20208800	20208900	hyper-methylation	0.337309
3	20301700	20301900	hyper-methylation	0.260549
3	20377300	20377400	hypo-methylation	-0.446964
3	20377600	20378100	hypo-methylation	-0.502386
3	20387600	20388300	hypo-methylation	-0.525226
3	20402100	20402800	hypo-methylation	-0.373757
3	20428300	20428400	hypo-methylation	-0.357086
3	20429000	20429400	hypo-methylation	-0.299075
3	20435700	20436300	hypo-methylation	-0.342257
3	20483800	20484200	hypo-methylation	-0.372631
3	20546400	20546800	hypo-methylation	-0.315466
3	20547000	20547500	hypo-methylation	-0.293373
3	20583500	20584000	hypo-methylation	-0.326271
3	20661500	20661800	hypo-methylation	-0.355557
3	20695400	20697400	hypo-methylation	-0.365586
3	20698900	20699200	hypo-methylation	-0.259113
3	20699900	20700000	hypo-methylation	-0.249603
3	20700700	20700900	hypo-methylation	-0.242453
3	20706600	20707000	hypo-methylation	-0.332995
3	20707100	20707400	hypo-methylation	-0.315053
3	20708300	20709100	hypo-methylation	-0.341492
3	20710100	20710400	hypo-methylation	-0.294612
3	20711400	20711700	hypo-methylation	-0.27801
3	20756800	20757300	hypo-methylation	-0.28756
3	20758500	20758900	hypo-methylation	-0.357738
3	20856500	20857000	hypo-methylation	-0.331765
3	20897700	20898000	hypo-methylation	-0.346259
3	20903200	20903700	hypo-methylation	-0.480323
3	20904200	20904800	hypo-methylation	-0.495908
3	20909400	20910000	hypo-methylation	-0.393239
3	20950400	20950600	hypo-methylation	-0.268051
3	20956400	20956700	hypo-methylation	-0.290091
3	20958600	20959000	hypo-methylation	-0.36429
3	20969200	20969500	hypo-methylation	-0.266615
3	20992100	20992400	hypo-methylation	-0.268085
3	21001200	21001500	hypo-methylation	-0.24285
3	21021500	21022100	hypo-methylation	-0.321676
3	21101200	21101700	hypo-methylation	-0.457993
3	21107900	21108400	hypo-methylation	-0.454958
3	21114400	21115000	hypo-methylation	-0.373167
3	21160800	21161000	hyper-methylation	0.275852
3	21163000	21163500	hypo-methylation	-0.364926
3	21171600	21172600	hypo-methylation	-0.37539
3	21174400	21174900	hypo-methylation	-0.336452
3	21186800	21187200	hypo-methylation	-0.300787
3	21211500	21212200	hypo-methylation	-0.441036
3	21293800	21294100	hypo-methylation	-0.307868
3	21314100	21314400	hypo-methylation	-0.420176
3	21344700	21344800	hypo-methylation	-0.289098
3	21362400	21362700	hypo-methylation	-0.373267
3	21429900	21430800	hypo-methylation	-0.319275
3	21430900	21431100	hypo-methylation	-0.328522
3	21439600	21439700	hypo-methylation	-0.311575
3	21456300	21456600	hypo-methylation	-0.311735
3	21617100	21617300	hypo-methylation	-0.3248
3	21629100	21629400	hypo-methylation	-0.372515
3	21641700	21642400	hypo-methylation	-0.393973
3	21680900	21681600	hypo-methylation	-0.402568
3	21741400	21741900	hyper-methylation	0.400308
3	21753900	21754400	hypo-methylation	-0.425418
3	21760000	21760700	hyper-methylation	0.397051
3	21895000	21895300	hyper-methylation	0.3741
3	21953000	21953300	hypo-methylation	-0.355549
3	22108200	22108600	hyper-methylation	0.25065
3	22108800	22109200	hypo-methylation	-0.333171
3	22108800	22109200	hypo-methylation	-0.343749
3	22230300	22230800	hypo-methylation	-0.321802
3	22231000	22231500	hypo-methylation	-0.339233
3	22249300	22249700	hypo-methylation	-0.343346
3	22302500	22303100	hypo-methylation	-0.372546
3	22304200	22304500	hypo-methylation	-0.292524
3	22353600	22353900	hyper-methylation	0.332913
3	22404100	22404200	hypo-methylation	-0.280587
3	22436700	22437100	hypo-methylation	-0.282079
3	22441400	22442200	hypo-methylation	-0.30365
3	22461700	22462100	hyper-methylation	0.35361
3	22483600	22484200	hypo-methylation	-0.428698
3	22486100	22486200	hypo-methylation	-0.315602
3	22486500	22486600	hypo-methylation	-0.30899
3	22486700	22487500	hypo-methylation	-0.345727
3	22590100	22590200	hypo-methylation	-0.308843
3	22593200	22593500	hypo-methylation	-0.295394
3	22684400	22684700	hypo-methylation	-0.252016
3	22747400	22747800	hypo-methylation	-0.403413
3	22747900	22748300	hypo-methylation	-0.428461
3	22748400	22749000	hypo-methylation	-0.431655
3	22804800	22805000	hypo-methylation	-0.359115
3	22871300	22872300	hypo-methylation	-0.524509
3	22872400	22873300	hypo-methylation	-0.570364
3	22972700	22973200	hypo-methylation	-0.365865
3	23000400	23001200	hypo-methylation	-0.294564
3	23005000	23005800	hypo-methylation	-0.401307
3	23006100	23006400	hypo-methylation	-0.401261
3	23006900	23007300	hypo-methylation	-0.268006
3	23007400	23007900	hypo-methylation	-0.293122
3	23046900	23047600	hypo-methylation	-0.421547
3	23072000	23072400	hypo-methylation	-0.402907
3	23083000	23083300	hypo-methylation	-0.312605
3	23085600	23085700	hypo-methylation	-0.410354
3	23114800	23115300	hypo-methylation	-0.359482
3	23115800	23116100	hypo-methylation	-0.365201
3	23163300	23163500	hypo-methylation	-0.358916
3	23201700	23202000	hypo-methylation	-0.30621
3	23202400	23202800	hypo-methylation	-0.331693
3	23215000	23215600	hypo-methylation	-0.313682
3	23217800	23218100	hypo-methylation	-0.306582
3	23218400	23218800	hypo-methylation	-0.305066
3	23245500	23245800	hypo-methylation	-0.287585
3	23273000	23273200	hypo-methylation	-0.367093
3	23389700	23389800	hypo-methylation	-0.264041
3	23444700	23445200	hypo-methylation	-0.412668
3	23453800	23453900	hyper-methylation	0.253955
3	23464800	23465600	hypo-methylation	-0.557089
3	23507000	23507200	hyper-methylation	0.2905
3	23631100	23631500	hypo-methylation	-0.312032
3	23654900	23655300	hypo-methylation	-0.368678
3	23681100	23681400	hypo-methylation	-0.293803
3	23692100	23692700	hypo-methylation	-0.379885
3	23794700	23795100	hypo-methylation	-0.467131
3	23808900	23809400	hypo-methylation	-0.519586
3	23854200	23854600	hypo-methylation	-0.420666
3	23903900	23904400	hypo-methylation	-0.283409
3	23916700	23917200	hypo-methylation	-0.310252
3	23923500	23924000	hypo-methylation	-0.495041
3	23924100	23924400	hypo-methylation	-0.418922
3	23939100	23939500	hypo-methylation	-0.433108
3	23944600	23945100	hypo-methylation	-0.281783
3	23949500	23949900	hypo-methylation	-0.35857
3	23950600	23950900	hypo-methylation	-0.32962
3	24010500	24010600	hypo-methylation	-0.301898
3	24010700	24010800	hypo-methylation	-0.302968
3	24181000	24181500	hypo-methylation	-0.431967
3	24182500	24183100	hypo-methylation	-0.341447
3	24183200	24183700	hypo-methylation	-0.371876
3	24184300	24185500	hypo-methylation	-0.399007
3	24261900	24262400	hypo-methylation	-0.345903
3	24262700	24262900	hypo-methylation	-0.370155
3	24282700	24283000	hypo-methylation	-0.311604
3	24321600	24321900	hyper-methylation	0.257275
3	24460900	24461500	hypo-methylation	-0.468703
3	24461700	24462700	hypo-methylation	-0.407001
3	24560600	24560900	hypo-methylation	-0.276535
3	24587900	24588400	hypo-methylation	-0.319458
3	24602600	24603100	hypo-methylation	-0.273451
3	24635300	24635400	hypo-methylation	-0.332622
3	24635500	24636500	hypo-methylation	-0.390746
3	24660000	24660400	hypo-methylation	-0.301922
3	24669800	24670200	hypo-methylation	-0.399068
3	24955000	24955800	hypo-methylation	-0.437723
3	24994600	24994800	hypo-methylation	-0.382025
3	25155100	25155200	hypo-methylation	-0.372213
3	25642900	25643400	hypo-methylation	-0.563404
3	26423200	26423500	hypo-methylation	-0.401233
3	26423600	26424200	hypo-methylation	-0.418408
3	26545100	26545500	hypo-methylation	-0.337491
3	26557600	26558000	hypo-methylation	-0.360417
3	26616800	26617100	hypo-methylation	-0.349892
3	26633800	26634300	hypo-methylation	-0.424
3	26724300	26724600	hypo-methylation	-0.288984
3	26724700	26725000	hypo-methylation	-0.289359
3	26732500	26732600	hypo-methylation	-0.363046
3	26745400	26745900	hypo-methylation	-0.308113
3	26828700	26829000	hypo-methylation	-0.297563
3	26852200	26852700	hypo-methylation	-0.355561
3	26860400	26860700	hypo-methylation	-0.335229
3	26961000	26961600	hypo-methylation	-0.424442
3	27041900	27042400	hypo-methylation	-0.373294
3	27088000	27088300	hypo-methylation	-0.269712
3	27142300	27142500	hypo-methylation	-0.332075
3	27148400	27148700	hypo-methylation	-0.283566
3	27295500	27296000	hypo-methylation	-0.370048
3	27369900	27370400	hypo-methylation	-0.434912
3	27370600	27371200	hypo-methylation	-0.49668
3	27389100	27389400	hypo-methylation	-0.278096
3	27407600	27407900	hypo-methylation	-0.296025
3	27701200	27701500	hypo-methylation	-0.372447
3	27701600	27701700	hypo-methylation	-0.342666
3	27727500	27727700	hypo-methylation	-0.256675
3	27875800	27876100	hypo-methylation	-0.338607
3	27876600	27876900	hypo-methylation	-0.301138
3	27923300	27923400	hyper-methylation	0.274216
3	27947600	27947700	hypo-methylation	-0.371479
3	27947800	27948100	hypo-methylation	-0.389454
3	27959000	27959400	hypo-methylation	-0.291774
3	28002600	28002900	hypo-methylation	-0.338392
3	28234700	28235200	hypo-methylation	-0.283872
3	28276500	28277100	hypo-methylation	-0.394617
3	28418500	28418600	hypo-methylation	-0.293891
3	28419100	28419400	hypo-methylation	-0.324292
3	29246400	29246800	hypo-methylation	-0.485622
3	29246900	29247400	hypo-methylation	-0.46333
3	29535000	29535300	hypo-methylation	-0.275987
3	29551600	29552200	hypo-methylation	-0.331012
3	29580000	29580700	hypo-methylation	-0.394547
3	29722100	29723400	hypo-methylation	-0.504089
3	29749100	29749400	hypo-methylation	-0.373571
3	29750400	29751300	hypo-methylation	-0.434414
3	29751800	29752900	hypo-methylation	-0.427831
3	29753100	29753500	hypo-methylation	-0.345731
3	29764900	29765100	hypo-methylation	-0.466521
3	29813800	29814100	hypo-methylation	-0.369995
3	29911700	29912100	hypo-methylation	-0.383806
3	29926700	29927200	hypo-methylation	-0.559908
3	30067000	30067700	hypo-methylation	-0.497539
3	30105500	30106000	hypo-methylation	-0.3324
3	30242600	30243200	hypo-methylation	-0.479875
3	30306300	30306800	hypo-methylation	-0.419131
3	30306900	30307300	hypo-methylation	-0.402607
3	30374900	30375200	hypo-methylation	-0.31541
3	30411200	30411300	hypo-methylation	-0.296007
3	30491100	30491400	hyper-methylation	0.254473
3	30512400	30512800	hypo-methylation	-0.293119
3	30544000	30544400	hypo-methylation	-0.369344
3	30964900	30965400	hypo-methylation	-0.501735
3	31157400	31157900	hypo-methylation	-0.485167
3	31873000	31873300	hypo-methylation	-0.243556
3	31938800	31939000	hypo-methylation	-0.322143
3	31958100	31958200	hypo-methylation	-0.298815
3	31996300	31996700	hypo-methylation	-0.39273
3	32001700	32001800	hypo-methylation	-0.354168
3	32010200	32010900	hypo-methylation	-0.466673
3	32104300	32104500	hypo-methylation	-0.224788
3	32119500	32120200	hypo-methylation	-0.360098
3	32120600	32121200	hypo-methylation	-0.325375
3	32247300	32247700	hypo-methylation	-0.359083
3	32621800	32622000	hypo-methylation	-0.362521
3	32712800	32713300	hypo-methylation	-0.35026
3	32916300	32916700	hypo-methylation	-0.293803
3	32936400	32936700	hypo-methylation	-0.37571
3	32977400	32977600	hypo-methylation	-0.283869
3	33078300	33078500	hypo-methylation	-0.3652
3	33150500	33151000	hypo-methylation	-0.423671
3	33151600	33154300	hypo-methylation	-0.399634
3	33160200	33160600	hypo-methylation	-0.353323
3	33225600	33226000	hypo-methylation	-0.384021
3	33238300	33239800	hypo-methylation	-0.488607
3	33294100	33294500	hypo-methylation	-0.599793
3	33294600	33294700	hypo-methylation	-0.594602
3	33300700	33301400	hypo-methylation	-0.339151
3	33323500	33323900	hypo-methylation	-0.343797
3	33328700	33329100	hypo-methylation	-0.337006
3	33329200	33329300	hypo-methylation	-0.31076
3	33935800	33936100	hypo-methylation	-0.236325
3	34092600	34092800	hypo-methylation	-0.357436
3	34107100	34107500	hypo-methylation	-0.282852
3	34569900	34570200	hypo-methylation	-0.263918
3	34660700	34661100	hypo-methylation	-0.273462
3	35077700	35078100	hypo-methylation	-0.396419
3	35302100	35302400	hypo-methylation	-0.425942
3	35526900	35527500	hypo-methylation	-0.650864
3	35535700	35536200	hypo-methylation	-0.360253
3	35575300	35576100	hypo-methylation	-0.327953
3	35603500	35604000	hypo-methylation	-0.386447
3	35604200	35604800	hypo-methylation	-0.35096
3	35838400	35838900	hypo-methylation	-0.269437
3	35839800	35840300	hypo-methylation	-0.355442
[truncated: 3,587 more rows]

## Sheet: CHH DMRs in Nip-9311
Supplementary Data 5. List of differential methylated regions between parental alleles in F1 endosperm.
chromosome	start	end	Comparison between parental allele
			Maternal - Paternal allele	difference of methylation levels
1	5586200	5586400	hyper-methylation	0.157317
1	5586500	5587100	hyper-methylation	0.157384
1	5587700	5587800	hyper-methylation	0.150859
1	5587900	5588000	hyper-methylation	0.162729
1	5588100	5588500	hyper-methylation	0.168538
1	5605300	5605600	hyper-methylation	0.12612
1	5606000	5606500	hyper-methylation	0.15033
1	8601000	8601100	hyper-methylation	0.136895
1	18136300	18136600	hyper-methylation	0.118837
1	26925300	26926600	hyper-methylation	0.187436
1	26927100	26927900	hyper-methylation	0.182507
1	26928400	26929500	hyper-methylation	0.185275
1	26930200	26931000	hyper-methylation	0.173872
2	18353400	18353700	hyper-methylation	0.166696
2	19233800	19234200	hyper-methylation	0.150582
2	27251000	27251300	hyper-methylation	0.154631
2	27251500	27252300	hyper-methylation	0.16266
2	33160400	33160500	hyper-methylation	0.1231
2	35817200	35817600	hyper-methylation	0.171421
3	20591800	20592100	hyper-methylation	0.226975
4	1750600	1751200	hyper-methylation	0.197493
4	4590400	4590800	hyper-methylation	0.152955
4	25130800	25131100	hyper-methylation	0.134637
4	29783900	29784700	hyper-methylation	0.157297
4	33718000	33718500	hyper-methylation	0.192933
5	547200	547600	hyper-methylation	0.147052
5	19707800	19708300	hyper-methylation	0.151589
5	20310900	20311300	hyper-methylation	0.199149
6	6214600	6216300	hyper-methylation	0.244912
6	8339300	8339700	hyper-methylation	0.147925
8	4035000	4035500	hyper-methylation	0.17905
8	27437500	27437900	hyper-methylation	0.155782
9	7168000	7168300	hyper-methylation	0.122675
9	14433300	14433500	hyper-methylation	0.1463
9	19228200	19228500	hyper-methylation	0.194109
9	19228600	19229800	hyper-methylation	0.19456
9	19230100	19230500	hyper-methylation	0.167309
9	19307400	19307700	hyper-methylation	0.122713
9	21248200	21248500	hyper-methylation	0.123023
9	21249500	21250000	hyper-methylation	0.174015
10	20153900	20154200	hyper-methylation	0.135272
11	4902600	4902800	hyper-methylation	0.145818
