# Supplementary material for: Multi-layered epigenetic control of persistent and stage-specific imprinted genes in rice endosperm
Source: Research Square preprint supplement (doi:10.21203/rs.3.rs-2403620/v1), 2023-01-11
Supplement: Supplementary file 16 [file Supplementary Data 6.xlsx]

## Sheet: Nip-Kas
Supplementary Data 6. List of the maternal enrichment regions for H3K27me3.
chromosome	start	end
1	425400	425700
1	427950	428100
1	564600	564750
1	570600	571050
1	574950	575250
1	575850	576000
1	576300	576450
1	1129200	1129350
1	1212750	1212900
1	1214250	1214400
1	1216500	1216650
1	1217550	1217700
1	1218300	1218600
1	1219200	1219800
1	1221900	1222050
1	1222350	1222500
1	1222800	1222950
1	1223250	1223400
1	1225200	1225350
1	1228950	1229100
1	1288500	1288650
1	1308750	1308900
1	1539000	1539150
1	1541700	1541850
1	1542750	1543050
1	1543350	1543500
1	1546650	1546950
1	1547550	1547850
1	1548150	1548600
1	1553250	1553550
1	1554000	1554150
1	1557900	1558200
1	1558650	1558800
1	1607400	1607550
1	1631250	1631550
1	1635150	1635300
1	2159250	2159400
1	2163000	2163450
1	2163750	2163900
1	2165700	2166000
1	2176050	2176500
1	2177250	2177400
1	2208300	2208450
1	2209050	2209500
1	2616600	2616750
1	2620650	2620800
1	2725650	2725800
1	3016500	3016800
1	3524250	3524400
1	3529950	3530100
1	3531150	3531300
1	3547200	3547350
1	3606600	3606750
1	4217924	4218074
1	4262924	4263074
1	4268024	4268174
1	4270424	4270724
1	4271024	4271174
1	4271474	4271774
1	4272074	4272524
1	4350074	4350224
1	4657124	4657424
1	4687724	4688024
1	4705274	4705724
1	4722224	4722674
1	5153174	5153324
1	5156774	5156924
1	5170574	5170874
1	5190074	5190374
1	5191874	5192024
1	5198024	5198324
1	5275424	5275874
1	5277224	5277374
1	5278424	5278724
1	5286524	5286674
1	5287274	5287424
1	5289074	5289374
1	5289674	5290274
1	5291474	5291924
1	5308874	5309024
1	5312024	5312624
1	5375474	5375774
1	5680874	5681024
1	5851424	5851724
1	5941274	5941424
1	5944574	5944724
1	5946674	5946824
1	5947274	5947424
1	5947874	5948774
1	5953124	5953424
1	5956274	5956574
1	6024524	6024674
1	6229124	6229424
1	6360224	6360374
1	6371024	6371174
1	6381974	6382274
1	6487424	6487724
1	6490274	6491024
1	6501674	6501824
1	6507674	6507824
1	6899774	6900074
1	6995324	6995474
1	7071074	7071224
1	7323074	7323224
1	7423124	7423274
1	7445174	7445474
1	7454924	7455074
1	7460024	7460324
1	7460624	7460924
1	7461374	7461824
1	7462274	7462574
1	7462874	7463474
1	7463774	7464074
1	7465424	7465574
1	7465874	7466174
1	7466474	7466624
1	7467224	7467824
1	7623524	7623674
1	7755374	7755524
1	7843724	7844174
1	8312098	8312398
1	9197698	9197848
1	9205048	9205198
1	9290248	9290398
1	9522148	9522298
1	9523048	9523198
1	9524248	9524698
1	9562048	9562198
1	9595348	9595498
1	9597598	9597748
1	9671548	9671698
1	9806998	9807448
1	10055248	10055398
1	10060948	10061248
1	10061998	10062598
1	10064398	10064848
1	10067398	10067848
1	10068748	10069348
1	10122148	10122448
1	10223998	10224148
1	10361848	10362298
1	10367848	10367998
1	10372048	10372198
1	10373398	10373548
1	10468348	10468498
1	10469998	10470148
1	10472098	10472398
1	10472998	10473448
1	10474348	10474498
1	10507648	10507798
1	10546048	10546198
1	10723198	10723348
1	10753198	10753348
1	10753798	10754098
1	10838098	10838248
1	11046748	11046898
1	11110648	11110798
1	11115898	11116048
1	11119798	11119948
1	11170948	11171098
1	11174398	11174698
1	11270548	11270698
1	11286448	11286598
1	11287348	11287948
1	11375398	11375548
1	11459848	11459998
1	12884022	12884172
1	12889422	12889572
1	13215822	13215972
1	13216872	13217172
1	13380822	13381122
1	13382922	13383072
1	13386072	13386672
1	13554222	13554372
1	13713822	13713972
1	13946322	13946622
1	13949922	13950072
1	13960722	13960872
1	13987272	13987422
1	14117172	14117322
1	14323422	14323722
1	14427522	14427672
1	14489472	14489622
1	14772072	14772222
1	14857122	14857272
1	14919222	14919522
1	14924172	14924322
1	14928072	14928222
1	14928822	14928972
1	14937672	14938272
1	14938572	14938722
1	14939172	14939772
1	14940822	14940972
1	14944572	14944872
1	15190722	15191022
1	15481122	15481872
1	15482322	15483222
1	15483522	15484122
1	15484422	15485022
1	15805722	15806022
1	15806622	15807072
1	15807372	15807822
1	15809322	15809772
1	15810222	15810672
1	15811722	15812172
1	15814422	15814722
1	15815622	15815922
1	15816672	15816822
1	15817122	15817722
1	15818322	15818472
1	15818922	15819072
1	15819672	15820572
1	15825072	15825372
1	15832722	15832872
1	15843672	15844122
1	15933372	15933522
1	15975822	15975972
1	15977772	15978222
1	15980772	15981072
1	15981372	15981522
1	15990672	15990822
1	16013472	16013622
1	16014822	16014972
1	16396272	16396422
1	17414546	17414696
1	18338246	18338546
1	18465146	18465296
1	18468596	18468746
1	18518096	18518396
1	18521996	18522146
1	18522896	18523346
1	18523946	18524246
1	18526046	18526346
1	20636470	20636620
1	20655370	20655670
1	20926870	20927020
1	21026770	21026920
1	21034120	21034420
1	21785320	21785470
1	21787120	21787270
1	21790870	21791170
1	21794620	21794920
1	21795370	21795520
1	22021120	22021270
1	22062520	22062820
1	22133770	22134070
1	22135120	22135420
1	22136470	22136620
1	22142470	22142620
1	22173520	22173670
1	22240270	22240420
1	22811620	22811920
1	22838170	22838470
1	22839520	22839820
1	22916770	22917070
1	22918120	22918570
1	22919170	22919620
1	22920820	22920970
1	22922170	22922320
1	23110270	23110420
1	23340370	23340520
1	23342320	23342470
1	23379670	23379820
1	23388820	23389270
1	23390020	23390320
1	23391670	23392420
1	23392720	23393020
1	23393320	23393620
1	23395270	23395420
1	23396020	23396170
1	23397070	23397220
1	23401720	23401870
1	23403220	23404570
1	23406370	23406520
1	23406970	23407120
1	23408620	23408770
1	23410120	23410270
1	23411320	23411920
1	23412370	23412520
1	23413420	23414770
1	23415520	23416420
1	23417320	23417470
1	23418970	23419270
1	23709820	23710120
1	23721220	23721520
1	23722570	23722720
1	23748370	23748520
1	23890720	23890870
1	23958070	23958370
1	24206770	24206920
1	24532120	24532420
1	24873744	24873894
1	24900444	24900594
1	25058694	25058844
1	25277694	25277994
1	26035494	26035794
1	26235894	26236194
1	26494494	26494644
1	26788944	26789094
1	26825244	26825394
1	26830944	26831394
1	26833044	26833194
1	27286344	27286494
1	27836844	27837144
1	27840144	27840294
1	28214544	28214694
1	28394244	28394694
1	28399494	28399644
1	28766468	28766768
1	28767818	28767968
1	28769168	28769318
1	28774118	28774568
1	28775018	28775168
1	28779068	28779218
1	29339168	29339318
1	29435618	29435918
1	29571368	29571518
1	29726768	29726918
1	30114968	30115118
1	30320318	30320468
1	30355718	30355868
1	30522368	30522518
1	30717218	30717518
1	31494368	31494518
1	31512218	31512668
1	31514018	31514168
1	31516718	31517018
1	31518068	31518368
1	31518818	31519118
1	31519418	31519568
1	32108168	32108318
1	32108618	32108918
1	32111768	32112068
1	32115818	32115968
1	32118068	32118218
1	32133518	32133818
1	32134118	32134418
1	32135168	32135318
1	32300168	32300768
1	32302568	32302868
1	32303318	32303468
1	32304218	32304668
1	32306468	32306768
1	32307668	32307818
1	32310818	32311118
1	32340218	32340368
1	32380118	32380268
1	32380718	32381618
1	32383268	32383418
1	32383718	32383868
1	32481968	32482268
1	32545418	32545568
1	32616218	32616368
1	32820368	32820668
1	32984542	32984692
1	32987242	32987692
1	33287692	33287842
1	33311092	33311242
1	33314542	33314992
1	33604642	33604792
1	33913342	33913492
1	34327792	34328242
1	34329142	34329292
1	34333492	34333792
1	34349542	34349842
1	34354942	34355542
1	34356142	34356442
1	34357642	34357792
1	34358842	34359742
1	34360192	34360792
1	34361992	34362142
1	34363642	34363942
1	34832692	34833142
1	34851592	34851742
1	34854892	34855042
1	34856392	34856542
1	35035492	35035642
1	35104192	35104342
1	35440792	35441092
1	35459692	35459992
1	35461342	35461492
1	35461792	35462092
1	35462992	35463892
1	35548192	35548342
1	35549692	35549992
1	35557642	35557792
1	35622142	35622442
1	35624542	35624992
1	35626342	35626792
1	35632642	35632792
1	35634142	35634292
1	35635042	35635192
1	35637892	35638192
1	35639242	35639392
1	35642242	35642692
1	35794492	35794642
1	36235642	36235942
1	36304342	36304642
1	36351742	36352042
1	36354892	36355192
1	36355792	36356092
1	36357142	36357292
1	36357892	36358192
1	36361042	36361342
1	36364192	36364492
1	36365242	36365542
1	37576266	37576416
1	38002116	38002416
1	38153166	38153316
1	38231016	38231166
1	38232966	38234466
1	38234916	38235816
1	38236716	38237016
1	38238066	38238216
1	38244366	38244516
1	38300766	38301516
1	38301966	38302116
1	38327616	38327916
1	38499066	38499216
1	38500266	38500566
1	38503116	38503266
1	38505516	38505666
1	38506866	38507166
1	38512716	38512866
1	38513616	38513766
1	38514516	38514816
1	38601366	38601516
1	39532716	39532866
1	39984216	39984366
1	40115916	40116216
1	40247466	40247616
1	40248066	40248516
1	40253616	40253766
1	40398516	40399266
1	40401366	40401516
1	40401816	40402566
1	40403166	40403316
1	40404666	40404966
1	40406016	40406166
1	40412166	40412766
1	40413066	40413516
1	40415616	40416066
1	40417416	40418016
1	40418766	40419216
1	40420416	40420566
1	40421166	40421316
1	40423566	40423866
1	40428066	40428516
1	40440816	40440966
1	40442016	40442316
1	40445916	40446216
1	40446516	40446666
1	40447266	40447416
1	40448316	40448616
1	40451166	40452666
1	40453116	40453566
1	40752966	40753116
1	40900416	40900566
1	41006466	41006616
1	41028366	41028666
1	41051990	41052140
1	41186540	41186690
1	41203190	41203490
1	41204390	41204840
1	41277890	41278040
1	41278340	41278490
1	41283440	41283890
1	41285540	41285690
1	41288990	41289290
1	41291090	41291240
1	41291540	41291690
1	41523590	41523890
1	41735390	41735540
1	41762090	41762390
1	41839340	41839490
1	41942240	41942390
1	41948090	41948240
1	41959490	41959790
1	42031790	42032090
1	42345740	42345890
1	42564140	42564440
1	42565640	42565790
1	42960140	42960290
1	42963140	42963290
2	478350	478650
2	1553400	1553550
2	2642250	2642550
2	2743050	2743500
2	2746500	2746800
2	2752500	2752650
2	2753250	2753400
2	2756100	2756250
2	2756700	2756850
2	2759700	2759850
2	3192750	3192900
2	3194100	3194400
2	3468450	3468600
2	3470700	3470850
2	3472050	3472200
2	3485250	3485400
2	3517500	3517650
2	3760050	3760200
2	3760950	3761100
2	3834450	3834600
2	3837000	3837300
2	3838200	3838650
2	4056750	4057350
2	4057800	4057950
2	4063800	4065000
2	4065900	4066200
2	4071300	4071450
2	4072050	4072200
2	4072500	4072950
2	4073400	4073550
2	4074750	4075050
2	4075800	4076550
2	4076850	4077150
2	4078050	4078350
2	4079700	4079850
2	4080450	4080900
2	4175324	4175624
2	4391324	4391474
2	4411574	4411874
2	4477724	4477874
2	4506374	4506524
2	4508774	4508924
2	4815224	4815374
2	4962674	4962824
2	5004974	5005424
2	5006024	5006174
2	5006624	5006774
2	5007074	5007224
2	5009924	5010074
2	5015924	5016224
2	5018774	5019074
2	5035424	5035574
2	5036174	5037224
2	5038124	5038424
2	5038724	5039174
2	5040224	5040374
2	5042024	5042324
2	5043824	5043974
2	5313974	5314124
2	6030674	6030974
2	6032774	6033074
2	6035324	6035474
2	6381824	6381974
2	6570974	6571124
2	6703574	6703724
2	6708524	6708674
2	6765074	6765374
2	6774074	6774224
2	6794024	6794174
2	6795674	6795824
2	6943424	6943724
2	7340024	7340174
2	7418174	7418774
2	7481474	7481624
2	7481924	7482074
2	7482824	7483124
2	7489424	7489724
2	7590224	7590524
2	7596374	7596524
2	7603274	7603424
2	7605974	7606124
2	7929974	7930124
2	8351998	8352148
2	8437798	8437948
2	8489848	8489998
2	8589148	8589448
2	8617348	8617648
2	8757598	8757898
2	8772598	8772748
2	8904148	8904298
2	8906098	8906248
2	8907898	8908048
2	8926648	8926798
2	9848098	9848398
2	9852148	9852298
2	9856198	9856498
2	9857998	9858298
2	9862498	9862648
2	9864598	9864748
2	9866398	9866548
2	9878248	9878548
2	10103098	10103548
2	10126198	10126348
2	10128748	10128898
2	10371148	10371298
2	10372048	10372198
2	10373098	10373398
2	10373698	10373998
2	10375948	10376248
2	10546348	10546498
2	10552198	10552498
2	10698298	10698748
2	10903498	10903648
2	11501098	11501248
2	11606848	11607148
2	11640298	11640448
2	11640898	11641198
2	11643598	11643748
2	11644048	11644198
2	11645398	11645698
2	11648248	11648398
2	11763298	11763448
2	11870848	11871148
2	12016648	12016798
2	12017248	12017398
2	12017998	12018148
2	12020398	12020848
2	12061198	12061498
2	12097498	12097648
2	12098398	12099148
2	12099448	12099598
2	12106048	12106348
2	12111748	12111898
2	12126448	12127048
2	12227698	12227998
2	12355572	12355872
2	12376122	12376422
2	12412572	12412872
2	12520422	12520572
2	12527172	12527322
2	12661722	12662772
2	12663222	12663372
2	12663972	12664422
2	12665322	12665772
2	12668922	12669072
2	12672222	12672372
2	12679872	12680022
2	12686322	12687072
2	12698022	12698172
2	12713622	12713922
2	12714372	12714672
2	12717972	12718572
2	12719922	12720372
2	12723972	12724722
2	12725772	12725922
2	12727272	12727422
2	12728022	12728322
2	12730122	12730722
2	12731172	12731322
2	12732072	12732222
2	12732672	12732972
2	12995022	12995322
2	13504122	13504722
2	13505622	13505772
2	13506522	13506822
2	14138922	14139222
2	14505522	14505672
2	14858022	14858322
2	15257022	15257322
2	15257772	15257922
2	15390672	15390822
2	15685122	15685422
2	15776622	15777072
2	16189422	16189722
2	16219872	16220022
2	16260672	16260972
2	16331622	16331922
2	16336722	16337172
2	16339572	16339872
2	16471796	16471946
2	16472696	16472996
2	17009546	17009696
2	17172446	17172596
2	17174546	17174696
2	17175596	17175896
2	17192846	17192996
2	17194496	17194796
2	17196446	17196596
2	17197796	17198246
2	17198696	17198846
2	17199296	17200796
2	17201396	17201546
2	17202596	17202896
2	17206496	17206796
2	17218196	17218496
2	17222546	17223146
2	17223596	17223746
2	17228846	17229146
2	17242796	17243246
2	17244596	17245196
2	17246396	17247146
2	17248646	17248796
2	17249246	17249396
2	17249696	17249996
2	17254196	17254496
2	17255546	17256146
2	17256746	17257946
2	17258696	17258846
2	17259896	17260796
2	17261396	17262296
2	17262596	17262896
2	17264546	17264696
2	17265146	17266046
2	17266796	17266946
2	17267996	17268296
2	17270846	17271146
2	17310896	17311046
2	17312246	17312546
2	17314046	17314496
2	17316296	17316446
2	17324546	17324696
2	17326196	17326496
2	17370146	17370296
2	18550796	18551246
2	18551996	18552146
2	18553346	18553496
2	19902296	19902596
2	19980446	19980596
2	19984796	19985096
2	19987796	19988246
2	20151596	20151896
2	20245946	20246396
2	20250896	20251196
2	20252846	20252996
2	20254046	20254196
2	20254796	20254946
2	20260196	20260346
2	20354246	20354546
2	20396546	20396696
2	20484746	20485046
2	20661520	20661820
2	20666920	20667070
2	20667520	20669320
2	20672920	20673520
2	21003370	21003520
2	21004870	21005470
2	21006220	21006520
2	21007270	21007420
2	21011470	21011770
2	21084520	21085270
2	21085870	21086170
2	21106120	21106270
2	21106570	21106720
2	21107470	21107620
2	21108520	21108670
2	21110170	21110320
2	21137470	21137620
2	21138970	21139270
2	21695320	21695470
2	21771670	21771820
2	21850870	21851620
2	21852520	21852670
2	21856420	21856570
2	21858220	21858370
2	21861520	21861670
2	22085920	22086070
2	22480420	22480570
2	22637620	22637770
2	22643920	22644070
2	22646320	22646470
2	22667770	22668070
2	22998520	22998670
2	23597020	23597320
2	23647870	23648170
2	23649070	23649220
2	23652970	23653120
2	23657620	23657770
2	23672170	23672320
2	23679820	23679970
2	23684470	23684770
2	23685370	23685520
2	23686120	23686570
2	23686870	23687320
2	23690770	23690920
2	23696170	23696470
2	23702770	23704120
2	23704420	23704570
2	23705170	23705320
2	23709370	23709520
2	23712820	23713120
2	24583270	24583420
2	24806244	24806544
2	24830844	24830994
2	24832794	24832944
2	24833544	24833694
2	24834444	24834594
2	24837594	24837744
2	24839094	24839244
2	24839544	24839844
2	24841044	24842244
2	24843744	24843894
2	24844644	24845094
2	24845844	24845994
2	25868394	25868694
2	25879644	25879794
2	25988394	25988544
2	26283594	26283894
2	26287194	26287344
2	26360694	26360994
2	26506644	26506794
2	27010194	27010494
2	27296844	27297144
2	27306444	27306594
2	27339744	27339894
2	27414594	27415044
2	27439344	27439494
2	27444894	27445344
2	27450894	27451644
2	27487194	27487344
2	29489318	29489618
2	29490368	29490518
2	29509418	29509568
2	29685368	29685518
2	29692418	29692718
2	29693318	29693468
2	29699468	29699618
2	29700068	29700518
2	29701718	29702018
2	29702468	29702768
2	29703218	29703518
2	29703968	29704418
2	29704868	29705018
2	29705468	29705618
2	29709818	29710118
2	30191768	30191918
2	30462518	30462968
2	30825368	30825668
2	30835118	30835418
2	31078868	31079168
2	31084568	31084718
2	31085168	31085318
2	31087568	31087718
2	31089068	31089218
2	31089518	31089668
2	31356068	31356218
2	31395218	31395668
2	31399418	31399568
2	31564868	31565168
2	31566368	31566818
2	31567118	31567568
2	31569218	31569518
2	31569818	31570268
2	31571468	31571618
2	31575068	31575368
2	31576718	31577168
2	31577768	31578218
2	31578968	31579118
2	31581668	31581968
2	31583168	31583468
2	31590518	31590818
2	31761668	31761968
2	31762418	31762868
2	31764218	31764518
2	31773668	31773968
2	32108318	32108468
2	32825842	32825992
2	32905192	32905342
2	33485542	33485842
2	33603592	33603742
2	33635842	33635992
2	33644392	33644692
2	33823042	33823342
2	33978292	33978442
2	34621492	34621792
2	34624942	34625092
2	34673092	34673242
2	34676542	34676692
2	34684792	34684942
2	34690042	34690192
2	34690942	34691242
2	34697542	34697842
2	34698892	34699042
2	34704592	34704742
2	34796992	34797142
2	34820392	34820542
2	35027092	35027242
2	35040292	35040442
2	35041792	35041942
2	35042242	35042692
2	35042992	35043742
2	35044042	35044192
2	35045242	35045392
2	35045842	35045992
2	35048392	35048542
2	35049442	35050192
2	35137042	35137192
2	35138392	35138842
2	35141842	35142142
2	35146642	35146942
3	670500	670650
3	1149750	1149900
3	1151850	1152000
3	1246800	1246950
3	1257750	1257900
3	1271850	1272150
3	1275150	1275750
3	1276650	1276800
3	1279050	1279200
3	1280700	1280850
3	1302600	1302750
3	1308450	1308600
3	1681350	1681500
3	1783950	1784100
3	2097150	2097300
3	2120100	2121000
3	4802174	4802474
3	4983824	4983974
3	5044424	5044724
3	5056424	5056574
3	6054074	6054524
3	6064874	6065024
3	6165824	6165974
3	6185324	6185474
3	6302624	6302774
3	6346424	6346874
3	6347774	6347924
3	6348224	6348524
3	6799274	6799424
3	6892724	6893024
3	7283024	7283474
3	7285724	7286024
3	7311074	7311224
3	7320824	7321124
3	7696574	7696874
3	7766474	7766624
3	7767074	7767224
3	7768874	7769174
3	7770674	7771124
3	7773374	7773524
3	7774124	7774274
3	7776224	7776374
3	7776824	7777124
3	7777724	7778774
3	7780874	7781174
3	7783874	7784174
3	7785074	7785374
3	7786724	7787024
3	7787474	7787924
3	7788224	7788374
3	7792274	7792424
3	7879124	7879424
3	7948424	7948574
3	7949024	7949174
3	7967924	7968074
3	8486098	8486248
3	8699548	8699698
3	9351748	9351898
3	9352948	9353398
3	9567448	9567598
3	9772198	9772498
3	10014748	10014898
3	10024048	10024198
3	10028848	10029148
3	10035598	10035748
3	10036798	10036948
3	10037698	10037998
3	10045048	10045498
3	10046548	10046848
3	10047148	10047448
3	10047898	10048198
3	10049398	10049548
3	10052398	10052698
3	10053598	10053898
3	10056298	10056448
3	10092598	10093048
3	10094248	10094398
3	10096498	10096648
3	10099348	10099798
3	10114048	10114198
3	10138948	10139248
3	10198648	10198798
3	10761598	10761748
3	10892848	10892998
3	11197948	11198398
3	11200798	11200948
3	11201998	11202298
3	11204698	11205148
3	11280448	11280748
3	11281198	11281348
3	11826598	11826898
3	12772722	12772872
3	12921672	12921822
3	12924222	12924522
3	13775622	13776072
3	13882722	13883172
3	13896672	13896822
3	13897272	13897422
3	13898172	13898472
3	13902672	13903122
3	14072622	14072772
3	14075922	14076072
3	14076672	14076822
3	14182272	14182572
3	14187522	14188272
3	14188572	14189472
3	14189922	14190072
3	14190672	14191122
3	14191422	14191722
3	14192922	14193072
3	14193372	14193672
3	14266872	14267022
3	14268522	14269722
3	14278722	14279922
3	14303622	14303922
3	14307372	14308422
3	14308722	14309472
3	14310372	14311272
3	14312322	14312472
3	14313522	14313822
3	14315022	14315172
3	14315472	14315622
3	14316222	14316672
3	14318922	14319822
3	14320572	14320872
3	14323272	14323722
3	14475822	14475972
3	14494122	14494422
3	14495322	14495472
3	14606322	14606772
3	14748072	14748522
3	14749422	14749722
3	14758572	14758722
3	14759172	14759622
3	14760072	14760222
3	15714672	15715122
3	15715422	15715572
3	15715872	15716022
3	15717972	15718422
3	15726972	15727272
3	15727722	15728022
3	15728472	15729072
3	15730422	15730722
3	15731022	15731172
3	15732972	15733572
3	15734022	15735072
3	15735372	15735972
3	15736272	15736872
3	15739422	15739572
3	15742872	15743022
3	15745122	15746022
3	15746322	15746772
3	15747072	15748272
3	15750522	15751122
3	15751572	15751722
3	15752472	15753072
3	15753672	15755172
3	15763872	15764022
3	15870372	15870522
3	15875622	15875772
3	15876672	15876822
3	15898122	15898272
3	15974622	15974922
3	16199772	16200072
3	16211322	16211622
3	16441946	16442096
3	16461896	16462046
3	16462346	16462496
3	16732796	16732946
3	16798496	16799096
3	16799396	16799546
3	16807196	16807346
3	16813346	16813646
3	17198846	17199296
3	17899646	17899946
3	17900246	17900396
3	17901596	17901746
3	17902646	17902946
3	17903696	17905496
3	17906396	17906846
3	17907746	17907896
3	17912846	17913146
3	17913746	17914046
3	18214346	18214646
3	18439946	18440096
3	18544646	18544796
3	18770246	18770396
3	19012646	19012796
3	19200896	19201196
3	19810046	19810196
3	20197346	20197496
3	20417996	20418146
3	20419496	20419646
3	20421746	20421896
3	20422496	20423396
3	20424746	20425046
3	20426246	20426396
3	20473796	20473946
3	20474546	20474696
3	20480546	20480846
3	20562070	20562220
3	20579770	20579920
3	20581420	20581570
3	20661370	20661670
3	20665870	20666020
3	20702770	20703370
3	20703970	20704270
3	20706370	20706670
3	20747020	20747170
3	20748520	20748670
3	20771170	20771470
3	20771770	20771920
3	20834170	20834320
3	20940370	20940520
3	21023320	21023470
3	21023770	21024520
3	21024970	21025120
3	21027970	21028120
3	21032020	21032320
3	21047170	21047320
3	21190870	21191170
3	21286720	21287020
3	21610120	21610270
3	21650770	21651070
3	21652720	21653020
3	21655570	21656170
3	21656770	21657520
3	21659170	21659620
3	21660220	21660370
3	21722320	21722470
3	22270870	22271020
3	22582870	22583020
3	22583470	22583620
3	22585420	22585870
3	22750120	22750270
3	22796620	22796770
3	22959070	22959220
3	23032720	23032870
3	23365420	23365570
3	23379370	23379520
3	23415820	23415970
3	23482570	23482720
3	23491270	23491570
3	23676820	23677270
3	23692720	23693020
3	23697970	23698120
3	23698570	23698870
3	23955220	23955370
3	23956270	23956420
3	23957320	23957620
3	23958820	23958970
3	23959270	23959420
3	23960020	23960170
3	23989720	23990020
3	23991070	23991370
3	23992720	23992870
3	24258070	24258820
3	24259420	24259720
3	24260020	24260320
3	24261820	24262120
3	24267070	24267220
3	24270220	24270970
3	24271420	24271870
3	24290320	24290620
3	24293770	24293920
3	24294370	24294520
3	24295570	24295870
3	24314320	24314620
3	24338620	24338770
3	24341770	24341920
3	24350470	24350920
3	24353170	24353470
3	24357820	24358720
3	24359320	24359470
3	24360820	24361570
3	24361870	24362320
3	24362620	24363520
3	24363970	24364420
3	24379420	24380170
3	24380620	24380920
3	24381220	24381370
3	24385570	24385720
3	24388270	24388870
3	24390370	24390670
3	24392170	24392620
3	24393370	24393520
3	24393820	24394570
3	24395170	24395320
3	24400120	24400870
3	24401170	24401470
3	24403570	24403870
3	24404320	24404470
3	24406270	24406570
3	24410320	24410470
3	24411220	24411820
3	24412570	24412870
3	24413170	24413620
3	24414370	24414970
3	24415270	24415720
3	24420070	24420670
3	24420970	24421120
3	24423370	24423520
3	24475120	24475270
3	24543370	24543520
3	24671094	24671244
3	24682794	24682944
3	24860994	24861144
3	24863844	24863994
3	24865344	24865494
3	25113744	25113894
3	25170744	25171044
3	25183494	25183794
3	25191444	25191594
3	25203894	25204044
3	25260594	25260744
3	25286844	25286994
3	25287594	25287894
3	25468944	25469094
3	25832394	25832544
3	26690694	26690844
3	26724444	26724594
3	26870844	26870994
3	26980494	26980794
3	26984244	26984394
3	26992194	26992494
3	26993544	26993844
3	27001794	27001944
3	27006294	27006594
3	27016044	27016194
3	27019644	27019794
3	27028194	27028644
3	27041694	27041844
3	27048144	27048444
3	27427044	27427194
3	27429294	27429444
3	27432894	27433194
3	27550494	27550794
3	27555594	27556194
3	27558744	27558894
3	27561294	27561594
3	27562794	27563094
3	27565344	27566394
3	27567144	27567294
3	27569394	27569544
3	27570294	27570444
3	27570744	27571344
3	27571644	27571794
3	27693894	27694044
3	27711444	27711744
3	27767544	27767694
3	27874494	27874794
3	28109694	28109844
3	28336794	28337094
3	28351794	28351944
3	28376694	28376844
3	28404144	28404894
3	28408344	28408494
3	28408794	28408944
3	28409244	28410144
3	28411944	28412244
3	28412694	28412994
3	28414044	28414794
3	28417944	28418094
3	28418394	28418694
3	28418994	28419294
3	28421094	28421244
3	28423344	28423644
3	28438494	28438794
3	28443744	28443894
3	28444944	28445244
3	28445694	28445844
3	28446294	28446444
3	29091818	29091968
3	29435318	29435468
3	29596118	29596268
3	29609918	29610218
3	29610518	29610818
3	29631968	29632418
3	29633018	29633168
3	29674568	29674718
3	29803268	29803418
3	29812268	29812418
3	30729368	30729818
3	30749018	30749168
3	30750518	30751118
3	30752618	30753368
3	30753668	30754568
3	30848468	30848618
3	31044968	31045118
3	31051568	31051718
3	31054868	31055168
3	31056218	31056368
3	31208318	31208768
3	31215218	31215368
3	31216418	31217018
3	31217768	31217918
3	31279118	31279418
3	31301618	31301918
3	31536218	31536518
3	31577918	31578068
3	31659668	31659968
3	31668218	31668368
3	32046068	32046218
3	32047118	32047268
3	32344268	32344418
3	32453768	32453918
3	32546918	32547068
3	33095092	33095242
3	33095692	33095842
3	33098842	33099442
3	33120292	33120442
3	33148942	33149242
3	33149542	33149842
3	33151942	33152092
3	33711742	33711892
3	33761092	33761242
3	33761992	33762292
3	33928792	33928942
3	33980992	33981142
3	33983842	33984142
3	33987892	33988342
3	34003642	34003792
3	34007092	34007242
3	34007692	34007992
3	34009342	34009492
3	34201792	34202242
3	34203292	34203592
3	34206292	34206442
3	34467742	34467892
3	34502992	34503742
3	34504942	34505242
3	34505842	34505992
3	34506742	34507192
3	35320792	35321542
3	35625592	35625742
3	35997742	35997892
3	35998792	35998942
3	35999242	35999542
3	36006142	36006592
3	36033892	36034192
3	36034642	36034792
3	36038542	36038992
3	36041842	36041992
3	36277642	36277792
3	36304042	36304342
3	36321892	36322192
3	36323392	36323842
3	36324442	36324892
3	36325492	36325942
3	36326392	36327442
3	36327742	36327892
3	36328192	36329092
3	36329542	36329842
3	36330292	36330592
3	36331792	36332242
3	36349342	36349642
4	517650	517800
4	519900	520500
4	523800	524250
4	957300	957450
4	1810800	1811100
4	1817250	1817550
4	1819950	1820100
4	1822200	1822350
4	1823550	1823850
4	1827600	1827750
4	1834950	1835100
4	1973400	1973700
4	1975500	1975650
4	1976100	1976550
4	1981200	1981500
4	1982850	1983000
4	1984200	1984500
4	2048400	2048550
4	2051250	2051400
4	2058150	2058300
4	2059050	2059350
4	2062050	2062200
4	2062650	2062800
4	2288850	2289150
4	2385750	2385900
4	2386350	2386500
4	2391000	2391300
4	2393700	2394450
4	2394750	2394900
4	2397450	2397750
4	2400000	2400150
4	2406000	2406300
4	2407950	2408100
4	2442150	2442450
4	2445600	2445750
4	2447400	2447700
4	2448000	2448300
4	2451900	2452050
4	2452350	2452500
4	2454900	2455650
4	2456100	2456550
4	2457450	2457600
4	2458200	2458500
4	2460150	2460300
4	2463000	2463450
4	2465250	2465400
4	2468100	2468250
4	2470350	2470500
4	2696250	2696550
4	2761500	2761650
4	2880450	2880600
4	3297300	3297600
4	3543000	3543300
4	3550050	3550200
4	3568800	3568950
4	3572550	3572700
4	3648450	3648750
4	3709350	3709650
4	4046100	4046250
4	4053750	4053900
4	4323524	4323674
4	4562324	4562474
4	4562924	4563374
4	4564124	4564274
4	4565324	4565624
4	4566974	4567424
4	4568624	4568774
4	4588574	4589024
4	4593074	4593224
4	4594124	4594424
4	4599224	4599524
4	4646774	4646924
4	4876274	4876424
4	5033174	5033324
4	5052374	5052674
4	5097824	5097974
4	5103824	5103974
4	5157224	5157374
4	5195174	5195324
4	5335274	5335724
4	5474924	5475224
4	5500424	5500574
4	5501774	5501924
4	5502674	5502824
4	5504174	5504324
4	5680574	5680874
4	5917574	5918024
4	5922224	5923274
4	5925824	5925974
4	5933774	5934374
4	5936324	5936474
4	5937074	5937224
4	5937524	5938274
4	5951924	5952374
4	5952824	5953124
4	5953874	5954324
4	5955524	5955974
4	5956724	5956874
4	5968724	5969174
4	5969474	5970524
4	5971724	5971874
4	5972324	5972474
4	5972924	5973374
4	5988374	5989274
4	5996024	5996174
4	5997974	5998124
4	5998424	5998574
4	6002474	6002924
4	6006374	6006674
4	6007424	6007724
4	6008174	6008324
4	6009374	6009524
4	6026924	6027374
4	6039674	6039974
4	6043874	6044024
4	6045374	6045524
4	6046274	6046724
4	6047324	6047774
4	6050924	6051824
4	6055124	6055274
4	6057224	6057374
4	6689174	6689324
4	7199774	7200074
4	7202774	7202924
4	7203524	7203974
4	7205624	7206074
4	7263074	7263224
4	8320498	8320648
4	9314998	9315148
4	10939198	10939348
4	11368498	11368648
4	11395348	11395648
4	11648998	11649148
4	11649598	11649748
4	11650948	11651098
4	11658148	11658298
4	12026698	12026998
4	12048898	12049048
4	12050848	12050998
4	12052498	12052648
4	12056848	12057148
4	12065248	12065398
4	12065848	12065998
4	12067198	12067498
4	12074098	12074248
4	12241198	12241348
4	12546072	12546372
4	12589722	12590172
4	12590922	12591222
4	12591972	12592122
4	12597522	12597822
4	12600822	12600972
4	12603672	12605922
4	12967122	12967272
4	12968622	12968772
4	12971922	12972522
4	12977172	12977322
4	12978072	12978222
4	12978672	12979572
4	12979872	12980322
4	12980622	12981072
4	12981372	12981972
4	12983622	12984222
4	12986322	12986472
4	12986772	12987072
4	12987372	12987822
4	12989172	12990222
4	12990522	12992772
4	12993672	12994272
4	12994872	12995022
4	12995322	12995472
4	12995772	12996522
4	12997122	12997272
4	12998772	12998922
4	12999372	12999822
4	13000272	13000422
4	13001322	13001622
4	13001922	13002072
4	13164672	13164822
4	13165722	13165872
4	13168122	13168572
4	13169172	13169472
4	13230672	13230822
4	13233822	13234122
4	13244172	13244322
4	13247172	13247472
4	13248072	13248222
4	13271772	13272222
4	13342272	13342722
4	13343622	13344072
4	13345572	13346172
4	13402272	13402722
4	13408122	13408422
4	13446522	13446672
4	13472322	13472622
4	13592922	13593222
4	13669272	13669422
4	13670022	13670172
4	13672122	13672272
4	13963722	13964022
4	14043522	14043672
4	14043972	14044272
4	14045322	14045472
4	14600022	14600172
4	14652522	14652672
4	14880972	14881122
4	14882472	14882622
4	15173472	15173622
4	15395772	15395922
4	15861672	15861972
4	15939522	15939672
4	15944022	15944322
4	15949122	15949272
4	15956022	15956472
4	15957222	15957372
4	15958122	15958272
4	15971472	15971622
4	15997722	15997872
4	16000722	16000872
4	16002372	16002522
4	16003572	16003722
4	16004022	16004322
4	16007172	16007922
4	16008522	16008672
4	16009722	16009872
4	16020672	16021272
4	16151472	16151772
4	16152072	16152372
4	16160472	16160772
4	16161072	16161222
4	16161672	16162122
4	16162422	16162722
4	16164072	16164222
4	16167372	16167822
4	16189872	16190022
4	16190622	16190922
4	16191522	16191822
4	16192422	16192572
4	16193022	16193172
4	16194222	16194522
4	16202772	16203072
4	16214772	16214922
4	16287372	16287822
4	16744046	16744196
4	16856696	16856846
4	16879346	16879646
4	16879946	16880246
4	16884596	16885196
4	16886846	16886996
4	16887446	16887596
4	16887896	16888196
4	16889096	16889396
4	16891796	16891946
4	16918346	16918646
4	16919096	16919246
4	16950296	16950596
4	16951346	16951496
4	16956446	16956746
4	16963196	16963346
4	16985396	16985546
4	16987796	16987946
4	16988546	16988696
4	16989146	16989296
4	16989896	16990046
4	16990946	16991846
4	16993796	16994096
4	16994696	16995446
4	16996046	16996346
4	16996946	16997246
4	16999646	16999796
4	17000246	17000696
4	17000996	17001896
4	17003396	17003546
4	17042546	17042696
4	17047646	17047946
4	17423696	17423996
4	17587646	17587796
4	18166346	18166496
4	18626096	18626246
4	18627146	18627596
4	18627896	18629096
4	18629396	18629846
4	18630146	18630596
4	18632396	18632546
4	18634046	18634496
4	18634946	18635096
4	18635396	18636446
4	18636896	18637196
4	18638096	18638396
4	18638846	18639146
4	18639596	18640796
4	18641546	18641696
4	18642896	18643196
4	18645596	18646046
4	18646946	18647096
4	18647396	18647546
4	18648596	18648746
4	18649046	18649196
4	18899696	18899846
4	18911396	18911696
4	18915596	18915746
4	18916646	18916946
4	18921746	18921896
4	18925196	18925346
4	19279646	19279796
4	19353146	19353446
4	19654046	19654346
4	19664846	19664996
4	19705196	19705496
4	19706846	19707296
4	19719146	19719596
4	19720946	19721096
4	19738046	19738196
4	19776746	19776896
4	19813496	19813646
4	19813946	19814096
4	19818896	19819046
4	19843496	19843646
4	19844546	19844846
4	19853396	19854296
4	19854896	19855946
4	19856996	19857146
4	19857896	19858346
4	19859546	19859846
4	19861196	19862396
4	19862696	19863446
4	19863746	19864046
4	19933796	19933946
4	19934246	19934696
4	19937846	19938146
4	20025296	20025446
4	20031146	20031446
4	20038046	20038346
4	20040296	20040746
4	20301746	20301896
4	20316746	20316896
4	20532670	20532820
4	20548420	20548570
4	20713420	20713570
4	20900020	20900170
4	21016120	21016270
4	21251920	21252070
4	21261520	21261820
4	21272170	21272320
4	22110970	22111120
4	22112920	22113070
4	22134670	22134820
4	22165270	22165570
4	22506370	22506670
4	22887370	22887670
4	22973170	22973320
4	23166670	23166970
4	23181370	23181520
4	23203570	23203720
4	23389870	23390020
4	24410770	24410920
4	24474670	24474970
4	24576070	24576220
4	24576670	24576970
4	24577270	24577570
4	24578170	24578470
4	24579520	24579670
4	24582370	24582670
4	24583270	24583420
4	24583720	24583870
4	24972294	24972444
4	24973194	24973644
4	24974094	24974394
4	24976494	24976794
4	24983094	24983394
4	24987294	24987744
4	24988644	24989244
4	24990744	24991344
4	24991644	24991944
4	24992244	24992394
4	24992844	24992994
4	24996294	24996594
4	24998544	24998844
4	24999594	25000044
4	25000494	25000644
4	25168494	25168794
4	25197444	25197744
4	25211094	25211844
4	25213944	25214094
4	25221594	25222044
4	25223394	25223694
4	25225644	25225794
4	25363044	25363344
4	25413444	25413594
4	25529244	25529394
4	25531044	25532094
4	25532394	25532544
4	25533294	25533594
4	25534944	25535094
4	26455494	26455644
4	26482344	26482944
4	26483394	26483544
4	26488194	26488944
4	26489244	26489394
4	26489844	26490144
4	26492094	26492394
4	26493144	26493294
4	26493894	26494194
4	26593644	26593794
4	27269244	27269544
4	27285144	27285294
4	27286494	27286644
4	27286944	27287844
4	27288744	27289194
4	27292794	27293094
4	27293394	27293544
4	27883644	27883794
4	27884694	27884844
4	27889044	27889194
4	27893394	27893544
4	27917244	27917694
4	29166368	29166518
4	29312768	29313068
4	29580968	29581118
4	30123218	30123368
4	30123818	30124568
4	30429818	30430268
4	31358618	31359068
4	31894868	31895018
4	32891092	32891542
4	34015342	34015492
4	34015942	34016092
4	34947142	34947442
4	35134642	35134792
5	162300	162600
5	163200	163350
5	163650	163800
5	165150	165300
5	167400	167550
5	167850	168150
5	168450	168900
5	170100	170400
5	523950	524100
5	1268100	1268250
5	1534200	1534350
5	1725300	1725450
5	1725750	1725900
5	1728000	1728300
5	1746300	1746600
5	1783350	1783500
5	1784100	1784250
5	1787250	1787400
5	1788450	1788750
5	1793100	1793250
5	1896150	1896300
5	1899900	1900350
5	1911450	1911750
5	1917450	1917600
5	1918950	1919100
5	1935300	1935450
5	1965300	1966050
5	1967250	1967700
5	1969200	1970250
5	1971150	1971300
5	1976400	1976550
5	1977150	1977450
5	1978500	1978650
5	1979850	1980450
5	1981050	1981200
5	2010600	2010900
5	2077800	2077950
5	2192100	2192400
5	2240400	2240850
5	2448300	2448450
5	2464800	2464950
5	2465250	2465400
5	2466750	2466900
5	2467200	2467350
5	2654100	2654400
5	2670750	2671050
5	2672700	2673000
5	2676600	2676750
5	2736300	2736450
5	2883900	2884350
5	2887350	2887650
5	2889600	2889750
5	2890350	2890500
5	2891400	2892750
5	2894400	2894850
5	2922450	2922750
5	3048300	3048600
5	3069000	3069150
5	3078900	3079050
5	3109950	3110100
5	3111000	3111150
5	3113100	3113550
5	3114000	3114150
5	3114450	3114600
5	3115800	3115950
5	3117450	3117750
5	3118650	3118800
5	3123150	3123300
5	3124800	3124950
5	3125250	3125550
5	3127650	3127800
5	3128250	3128550
5	3130650	3130800
5	3131100	3131250
5	3134100	3134250
5	3134550	3134850
5	3136650	3136800
5	3139200	3139500
5	3139800	3139950
5	3140700	3141300
5	3146550	3146700
5	3164850	3165000
5	3167550	3167850
5	3168900	3169500
5	3171750	3171900
5	3173100	3173250
5	3238200	3238350
5	3330300	3330450
5	3741600	3741750
5	3828300	3828450
5	3846300	3846450
5	3891750	3891900
5	3955500	3955650
5	4145624	4145774
5	5348624	5348924
5	5480774	5480924
5	5537924	5538074
5	5545424	5545724
5	5793524	5793824
5	5811374	5811524
5	5860274	5860574
5	6102524	6102974
5	6213224	6213374
5	6251174	6251474
5	6252524	6252974
5	6258974	6259124
5	6259574	6259724
5	6260624	6261074
5	6261974	6262124
5	6263624	6264074
5	6264974	6265124
5	6266474	6266624
5	6267374	6267524
5	6268424	6269024
5	6269324	6269474
5	6269924	6270224
5	6270674	6271274
5	6273674	6273824
5	6274574	6274874
5	6277574	6278024
5	6279074	6279824
5	6280274	6280574
5	6283724	6284174
5	6286874	6287024
5	6305324	6305474
5	6305924	6306224
5	6328874	6329174
5	6392624	6393074
5	6398174	6398324
5	6400274	6400424
5	6423374	6423824
5	6424874	6425174
5	6427424	6427574
5	6432824	6433424
5	6434624	6434774
5	6435524	6435674
5	6436724	6436874
5	6442874	6443024
5	6445124	6445274
5	6446624	6447224
5	6448424	6448574
5	6450224	6450674
5	6453824	6454124
5	6455624	6455774
5	6457424	6457574
5	6458024	6458324
5	6458624	6458924
5	6459374	6459524
5	6461624	6462074
5	6462374	6462524
5	6481274	6481574
5	6481874	6482024
5	6506924	6507074
5	6567674	6567824
5	6569324	6569474
5	6570374	6570674
5	6708824	6709124
5	6738974	6739124
5	6813524	6813824
5	6814724	6814874
5	6816974	6817274
5	6820574	6821174
5	6832424	6832724
5	6948824	6948974
5	6954374	6954674
5	6956624	6956774
5	6958424	6958724
5	6961724	6962024
5	6970124	6970424
5	6972974	6973274
5	6973574	6973874
5	6975224	6975674
5	6977474	6977624
5	6978524	6978824
5	6979274	6980324
5	6980924	6981074
5	6985874	6986174
5	6986474	6986624
5	6987224	6987374
5	6989024	6989474
5	6990824	6991124
5	6992474	6992624
5	6993074	6993524
5	6994424	6994874
5	6995474	6995924
5	6997574	6997874
5	6998174	6998324
5	6999674	6999974
5	7001774	7001924
5	7002974	7003424
5	7005074	7005224
5	7009124	7009424
5	7105274	7105574
5	7234874	7235174
5	7253324	7253624
5	7254074	7254224
5	7268624	7268924
5	7272674	7272824
5	7365824	7366124
5	7381274	7381424
5	7414874	7415024
5	7563524	7563974
5	7752824	7753124
5	7755374	7755524
5	8086574	8086724
5	8094974	8095124
5	8095424	8095724
5	8108174	8108624
5	8119874	8120174
5	8182724	8183024
5	8245198	8245648
5	8245948	8246698
5	8247898	8248198
5	8248798	8249098
5	8249398	8249548
5	8250898	8251048
5	8254198	8254498
5	8401648	8401948
5	8408848	8409148
5	8411848	8412298
5	8493898	8494198
5	9058348	9058498
5	9124498	9124648
5	9133198	9133498
5	9215698	9215848
5	9222598	9222898
5	9226498	9226798
5	9290698	9290998
5	9294598	9294898
5	9295498	9296398
[truncated: 2,832 more rows]

## Sheet: Nip-9311
Supplementary Data 6. List of the maternal enrichment regions for H3K27me3.
chromosome	start	end
1	563550	563700
1	564900	565050
1	566400	566850
1	567150	567750
1	568050	568200
1	569100	569250
1	570600	570750
1	571050	571200
1	573450	573900
1	574650	574800
1	575700	576000
1	576450	576600
1	1117950	1118100
1	1128150	1128300
1	1541209	1541659
1	1542559	1543159
1	1543459	1543759
1	1544509	1545409
1	1546759	1547209
1	1547809	1548559
1	1548859	1549309
1	1550359	1550809
1	1607359	1607659
1	1617709	1618009
1	1618759	1619959
1	1620859	1621009
1	1621309	1621609
1	1622659	1622809
1	1623559	1624009
1	1625059	1625809
1	1628659	1628959
1	1630309	1630609
1	1630909	1631509
1	1690609	1690909
1	2147659	2147809
1	2148559	2149159
1	2149759	2150359
1	2150659	2151409
1	2159659	2159959
1	2161159	2161309
1	2161759	2161909
1	2162209	2162509
1	2162959	2164459
1	2164909	2165359
1	2165809	2166259
1	2166559	2166859
1	2167159	2167309
1	2167609	2167759
1	2169109	2169409
1	2170759	2170909
1	2171959	2172109
1	2173009	2173159
1	2173759	2174059
1	2176459	2176759
1	2179159	2179309
1	2204209	2204509
1	2205259	2205409
1	2206609	2206909
1	2209309	2209759
1	2210209	2211259
1	2213209	2213359
1	2228509	2228809
1	2238559	2238709
1	2272459	2272609
1	2320759	2320909
1	2325259	2325559
1	2327509	2327809
1	2330209	2330509
1	2330809	2331109
1	2332009	2332159
1	2335009	2335159
1	2614309	2614609
1	2616259	2616709
1	2617309	2617609
1	2618509	2618659
1	2620009	2620309
1	2621209	2621659
1	2622109	2622559
1	2628409	2628709
1	2892518	2892668
1	3343118	3343268
1	3409268	3409568
1	3522968	3523268
1	3524018	3525218
1	3529118	3529268
1	3561068	3561218
1	3690818	3691118
1	3692168	3692318
1	3967418	3967568
1	4073168	4073318
1	4150268	4150568
1	4264077	4264227
1	4265727	4266027
1	4266327	4266477
1	4266777	4267077
1	4267377	4268277
1	4270377	4270677
1	4271127	4272477
1	4350477	4350627
1	4354227	4354377
1	4502727	4502877
1	4590477	4590627
1	4595277	4595427
1	4656627	4656777
1	4660677	4661427
1	4662477	4662927
1	4668927	4669227
1	4669977	4671027
1	4679127	4679277
1	4707777	4708377
1	4874877	4875027
1	4875327	4875477
1	4876827	4876977
1	4915977	4916127
1	4930077	4930227
1	5013027	5013177
1	5047227	5047527
1	5081877	5082177
1	5089677	5089827
1	5160477	5160627
1	5165877	5166177
1	5168577	5169477
1	5169927	5170227
1	5171127	5171427
1	5192427	5192727
1	5194227	5194377
1	5194677	5194827
1	5197527	5197827
1	5203527	5203677
1	5204127	5204577
1	5205027	5205327
1	5266377	5266527
1	5276427	5276577
1	5276877	5277027
1	5278527	5278677
1	5279427	5279577
1	5286327	5286777
1	5287827	5288277
1	5289027	5289777
1	5290227	5290377
1	5291577	5291727
1	5293077	5293377
1	5308527	5308827
1	5309877	5310327
1	5311527	5311977
1	5313477	5313627
1	5316777	5317377
1	5317827	5318127
1	5385627	5385777
1	5421477	5421627
1	5514477	5514627
1	5571777	5572227
1	5575527	5575827
1	5577627	5577777
1	5589886	5590036
1	5599786	5599936
1	5650186	5650636
1	5681986	5682136
1	5686636	5686786
1	5941636	5942236
1	5942836	5943736
1	5944936	5945986
1	5947186	5947336
1	5947786	5948686
1	5949736	5950336
1	5950786	5951236
1	5952136	5952286
1	5953186	5953486
1	5955736	5956186
1	5956936	5957086
1	5979736	5979886
1	6161386	6161536
1	6489736	6489886
1	6605536	6605836
1	6680236	6680386
1	6681736	6681886
1	6682186	6682336
1	6691786	6692086
1	6818236	6818386
1	6824086	6824386
1	6828136	6828286
1	6910036	6910336
1	6950086	6950236
1	6961036	6961186
1	6993545	6993845
1	7027145	7027295
1	7029995	7030445
1	7036145	7036295
1	7136645	7136795
1	7153895	7154045
1	7184795	7184945
1	7287545	7287695
1	7445945	7446245
1	7455995	7456145
1	7460945	7461545
1	7462295	7462745
1	7463045	7464545
1	7465595	7466195
1	7466645	7466945
1	7467545	7467845
1	7468145	7468295
1	7607795	7608245
1	7613945	7614095
1	7624895	7625045
1	7678295	7678445
1	7807295	7807445
1	7866545	7866695
1	8155145	8155295
1	8298845	8298995
1	8299745	8299895
1	8311595	8311745
1	8396604	8396904
1	8429004	8429304
1	9147354	9147654
1	9392754	9392904
1	9468054	9468204
1	9520704	9520854
1	9521304	9521604
1	9522504	9522804
1	9523254	9523704
1	9524304	9524604
1	9524904	9525204
1	9527304	9527904
1	9549204	9549504
1	9551304	9551454
1	9552204	9552354
1	9553554	9554154
1	9554454	9554754
1	9562254	9562554
1	9564054	9565104
1	9570204	9570654
1	9595404	9595704
1	9598254	9598404
1	9598854	9599004
1	9676104	9676254
1	9712854	9713154
1	9717804	9717954
1	9718254	9718554
1	9792463	9792613
1	10056163	10056313
1	10060963	10061113
1	10061713	10062313
1	10062613	10062913
1	10063513	10063963
1	10064713	10065463
1	10066363	10066663
1	10067263	10068163
1	10068463	10069213
1	10069663	10070113
1	10224913	10225363
1	10227763	10228063
1	10228363	10228663
1	10342813	10342963
1	10352863	10353313
1	10354513	10354813
1	10361863	10362013
1	10362913	10363063
1	10363513	10363813
1	10364113	10364563
1	10364863	10365013
1	10369213	10369363
1	10372063	10372963
1	10373563	10373713
1	10374163	10374613
1	10432963	10433113
1	10447063	10447213
1	10464463	10464913
1	10472263	10472413
1	10478113	10478263
1	10480513	10480663
1	10481713	10482013
1	10493113	10493263
1	10496413	10496713
1	10511863	10512013
1	10555663	10555813
1	10557463	10557763
1	10617613	10617913
1	10629613	10629763
1	10663963	10664263
1	10746163	10746313
1	10753963	10754113
1	10754413	10754563
1	10765213	10765363
1	10948063	10948213
1	11014363	11014513
1	11015413	11015563
1	11019163	11019313
1	11057413	11057563
1	11472272	11472872
1	11473772	11474222
1	11504522	11504972
1	11557922	11558222
1	11829122	11829272
1	12151772	12151922
1	12161522	12161672
1	12164072	12164222
1	12176972	12177122
1	12206522	12206672
1	12207422	12207572
1	12208472	12208622
1	12219872	12220022
1	12226022	12226172
1	12227522	12227822
1	12228122	12228272
1	12285122	12285272
1	12495422	12495572
1	12510722	12511022
1	12571581	12571731
1	12882831	12882981
1	12888981	12889131
1	13145181	13145481
1	13214781	13214931
1	13215231	13215381
1	13216431	13216581
1	13217631	13217781
1	13218381	13218531
1	13381431	13381581
1	13385481	13386231
1	13389081	13389231
1	13485531	13485831
1	13518081	13518231
1	13552581	13552731
1	13554081	13554531
1	13555131	13555281
1	13841631	13841781
1	13942281	13942431
1	13946331	13946481
1	14176840	14177140
1	14190490	14190640
1	14192590	14192740
1	14256940	14257240
1	14420890	14421040
1	14637640	14637940
1	14904340	14904490
1	14908990	14909290
1	14920990	14921290
1	14924440	14925340
1	14938690	14938990
1	14939440	14939740
1	14941240	14941690
1	14944390	14944540
1	15190990	15191140
1	15479399	15479699
1	15481949	15482099
1	15482699	15483449
1	15484049	15485249
1	15485849	15485999
1	15489149	15489299
1	15489899	15490199
1	15806099	15807149
1	15807749	15808049
1	15809099	15809249
1	15810149	15810299
1	15811049	15811199
1	15811499	15811649
1	15812399	15813749
1	15814199	15814349
1	15815849	15816149
1	15816749	15816899
1	15817199	15817349
1	15818699	15818849
1	15821249	15821999
1	15823049	15823199
1	15825149	15825449
1	15826049	15826349
1	15828749	15828899
1	15830099	15830249
1	15830699	15832499
1	15835199	15835349
1	15939899	15940199
1	15974999	15975149
1	15976049	15976199
1	15977999	15978149
1	15978599	15979649
1	15980399	15980699
1	16389749	16389899
1	16481399	16481699
1	16506899	16507049
1	16514699	16514849
1	17414208	17414508
1	17680308	17680458
1	17688408	17688558
1	17793708	17793858
1	17886858	17887008
1	17955858	17956158
1	17990358	17990508
1	18074658	18074958
1	18217717	18218017
1	18501517	18501667
1	18517267	18517417
1	18518017	18519067
1	18519517	18519667
1	18522217	18522517
1	18522817	18523267
1	18525367	18525817
1	18526267	18526717
1	18530767	18531067
1	18531817	18531967
1	18802267	18802417
1	18816667	18816817
1	18888517	18888667
1	18894967	18895117
1	18895567	18895867
1	18896617	18896767
1	19055317	19055467
1	19104817	19104967
1	19143517	19143817
1	19144867	19145017
1	19148017	19148167
1	19177567	19177867
1	19272067	19272217
1	19274617	19275367
1	19276717	19276867
1	19277167	19277467
1	19277917	19278067
1	19278367	19278817
1	19279567	19280017
1	19289317	19289767
1	19290217	19290517
1	19292167	19292617
1	19293217	19293817
1	19296667	19296817
1	19333867	19334017
1	19340017	19340167
1	20055776	20056226
1	20061026	20061176
1	20062226	20062376
1	20329226	20329376
1	20421476	20421626
1	20521676	20521976
1	20638226	20638376
1	20639426	20639576
1	20642126	20642276
1	20642876	20644526
1	20645126	20645576
1	20645876	20646476
1	20646776	20646926
1	20647226	20648276
1	20649476	20649626
1	20650376	20650676
1	20650976	20651876
1	20652476	20652626
1	20653076	20654276
1	20654726	20654876
1	20655326	20655926
1	20656376	20656526
1	20657576	20657876
1	20658626	20658926
1	20667626	20668076
1	20711126	20711426
1	20872076	20872226
1	20958435	20958735
1	21019485	21019785
1	21021285	21022785
1	21023835	21024135
1	21024435	21024585
1	21024885	21025185
1	21026535	21027885
1	21028185	21028335
1	21029835	21029985
1	21740985	21741285
1	21783435	21783585
1	21785085	21785235
1	21785535	21785685
1	21786435	21786735
1	21788535	21789135
1	21789585	21790335
1	21790935	21791235
1	21791685	21792135
1	21792585	21794085
1	21795135	21795285
1	21808335	21808485
1	21815835	21815985
1	21818985	21819135
1	21916635	21916935
1	21989085	21989835
1	21991185	21991485
1	22003785	22004085
1	22010835	22010985
1	22017735	22017885
1	22018185	22018335
1	22020135	22020285
1	22020585	22021185
1	22023285	22023435
1	22134285	22134435
1	22145235	22145535
1	22179885	22180185
1	22192335	22192485
1	22235235	22235385
1	22236435	22236885
1	22239735	22240185
1	22308435	22308735
1	22311435	22311735
1	22363594	22363894
1	22365244	22365394
1	22367494	22367794
1	22368094	22368244
1	22800694	22800844
1	22801294	22801594
1	22802944	22803094
1	22803694	22804294
1	22813294	22813594
1	22814044	22814194
1	22815244	22815544
1	22815844	22816144
1	22816444	22816744
1	22819444	22819594
1	22873594	22873894
1	22917094	22917394
1	22918144	22918594
1	22919194	22919944
1	22920394	22920994
1	22924294	22924744
1	23342194	23342344
1	23378344	23378794
1	23379544	23379844
1	23384344	23384944
1	23387644	23388394
1	23389144	23389444
1	23390494	23390794
1	23391844	23392144
1	23392744	23393044
1	23395444	23395894
1	23398294	23398594
1	23400244	23401444
1	23401744	23402344
1	23402944	23403394
1	23403694	23403844
1	23404744	23405044
1	23406094	23406394
1	23406994	23407294
1	23407744	23407894
1	23409694	23410444
1	23411344	23412094
1	23412544	23413144
1	23413894	23414044
1	23414494	23414794
1	23415244	23415394
1	23415994	23416294
1	23416894	23417044
1	23417344	23417794
1	23418544	23419594
1	23419894	23420044
1	23709694	23709844
1	23724544	23724694
1	23736994	23737294
1	23782103	23782253
1	24097403	24097553
1	24597053	24597203
1	24655853	24656303
1	24669653	24669803
1	24867953	24868253
1	24970703	24971003
1	25014653	25014953
1	25015253	25015553
1	25018553	25018703
1	25219362	25219662
1	25504812	25504962
1	25872012	25872462
1	25906662	25906812
1	26235912	26236062
1	26270862	26271162
1	26273862	26274012
1	26327562	26327712
1	26737621	26737771
1	26738971	26739271
1	26739721	26739871
1	26761321	26761621
1	26831521	26831671
1	26832271	26832871
1	26846821	26848321
1	27295771	27296071
1	27515371	27515521
1	27617521	27617821
1	27671971	27672121
1	27687871	27688171
1	27817321	27817771
1	27835621	27835771
1	28023830	28023980
1	28214180	28214480
1	28265030	28265180
1	28326830	28327130
1	28373930	28374080
1	28397780	28398080
1	28399580	28399880
1	28400180	28400330
1	28462580	28462730
1	28583330	28583630
1	28617980	28618130
1	28768280	28768580
1	28770080	28770230
1	28772030	28772180
1	28774130	28774430
1	28779680	28779980
1	29055680	29055980
1	29057330	29057480
1	29058380	29058830
1	29097080	29097230
1	29873439	29873589
1	29891439	29891589
1	29895039	29895489
1	30078189	30078489
1	30240039	30240189
1	30299889	30300039
1	30312489	30312789
1	30603339	30603489
1	30840298	30840448
1	31097248	31097398
1	31341748	31342048
1	31343098	31343548
1	31345948	31346248
1	31499698	31499848
1	31509748	31510048
1	31510798	31510948
1	31511998	31513348
1	31513648	31514248
1	31515148	31515448
1	31516648	31517098
1	31517698	31517848
1	31518148	31519798
1	31794898	31795048
1	31867198	31867348
1	31913698	31913848
1	31941598	31942198
1	31942498	31942948
1	31946398	31946548
1	31985848	31985998
1	32105548	32105848
1	32109598	32109748
1	32110648	32110798
1	32111698	32112148
1	32113948	32114098
1	32114698	32115148
1	32117398	32117548
1	32118898	32119048
1	32152307	32152607
1	32218307	32218457
1	32239157	32239307
1	32298857	32299157
1	32300057	32300207
1	32301107	32301407
1	32301707	32301857
1	32302457	32302757
1	32303207	32303657
1	32304557	32304707
1	32305757	32306357
1	32306657	32307707
1	32308007	32308307
1	32309207	32310107
1	32312957	32313107
1	32316557	32316857
1	32317907	32318207
1	32380607	32380757
1	32383457	32383907
1	32477057	32477357
1	32483807	32483957
1	32484407	32484557
1	32486507	32486657
1	32722007	32722307
1	32797457	32797607
1	32811257	32811407
1	32816357	32816657
1	32817857	32818157
1	32818607	32818907
1	32820857	32821007
1	33260507	33260657
1	33311507	33311657
1	33591816	33591966
1	33603966	33604116
1	33604416	33604566
1	33842766	33842916
1	33911016	33911166
1	34255416	34255566
1	34291716	34291866
1	34327416	34327866
1	34328616	34328766
1	34332066	34332666
1	34334466	34334616
1	34335066	34335216
1	34348866	34349016
1	34349466	34349766
1	34350216	34350366
1	34350816	34351566
1	34352316	34352616
1	34355016	34355466
1	34355766	34356066
1	34356516	34356666
1	34357866	34359966
1	34360866	34361016
1	34361316	34361466
1	34362366	34363266
1	34848066	34848216
1	34850616	34850766
1	34851066	34851216
1	34852116	34852266
1	34853916	34854216
1	34854816	34855116
1	34856166	34856466
1	35227825	35227975
1	35311225	35311375
1	35441125	35441275
1	35460625	35461975
1	35462425	35464675
1	35468125	35468275
1	35515675	35515825
1	35516125	35516575
1	35547925	35548075
1	35604025	35604175
1	35616475	35616625
1	35622325	35623675
1	35624725	35624875
1	35625325	35625925
1	35626975	35628775
1	35629225	35629375
1	35631025	35632825
1	35633125	35633275
1	35633725	35634325
1	35634775	35634925
1	35643175	35643925
1	35644225	35644675
1	35687725	35687875
1	35802175	35802325
1	36194575	36194725
1	36258775	36258925
1	36350684	36350984
1	36352634	36352934
1	36353834	36354134
1	36354734	36355334
1	36355634	36355934
1	36357134	36358184
1	36358784	36358934
1	36363884	36364034
1	36660734	36661334
1	36662984	36663134
1	36663434	36663584
1	37107134	37107284
1	37250234	37250384
1	37325984	37326134
1	37327784	37328234
1	37378484	37378634
1	37401284	37401434
1	37573334	37573784
1	37599584	37599884
1	37602734	37603034
1	37604234	37604534
1	37939443	37939593
1	37957293	37957593
1	38061993	38062143
1	38150043	38150193
1	38230143	38230443
1	38230743	38231343
1	38231943	38232093
1	38232993	38235843
1	38237193	38237343
1	38237943	38238093
1	38245893	38246043
1	38300793	38301543
1	38301843	38302293
1	38302593	38302893
1	38303793	38304093
1	38456643	38456793
1	38497143	38497293
1	38506893	38507043
1	38511843	38512143
1	38513643	38514243
1	38514543	38514843
1	38515593	38515743
1	38671443	38671593
1	38797893	38798043
1	38806293	38806593
1	38918793	38918943
1	39107002	39107302
1	39138802	39138952
1	39148402	39148552
1	39205252	39205702
1	39246652	39246802
1	39395752	39395902
1	39495502	39495802
1	39536302	39536602
1	39736102	39736252
1	39942052	39942202
1	40115752	40115902
1	40118452	40118752
1	40248502	40248652
1	40249102	40249252
1	40319452	40319602
1	40327552	40327702
1	40341502	40341952
1	40345702	40345852
1	40348552	40348702
1	40349152	40349452
1	40349752	40349902
1	40350202	40350502
1	40351552	40351702
1	40352002	40352152
1	40353502	40353652
1	40359352	40360402
1	40361302	40361752
1	40396402	40396852
1	40397452	40398202
1	40398502	40399402
1	40400002	40400302
1	40401202	40401502
1	40401802	40402252
1	40402702	40402852
1	40403152	40403602
1	40404352	40405102
1	40406002	40406152
1	40406452	40406752
1	40407352	40407802
1	40410052	40411552
1	40412152	40413352
1	40413652	40416202
1	40416802	40417252
1	40417552	40418302
1	40418902	40419352
1	40419952	40420402
1	40420852	40421302
1	40424602	40425202
1	40426252	40427302
1	40428052	40428352
1	40435402	40435552
1	40437352	40437652
1	40440202	40440502
1	40440802	40441102
1	40442002	40442902
1	40445602	40445752
1	40446052	40446502
1	40446802	40447402
1	40448452	40449352
1	40449802	40450552
1	40450852	40451302
1	40451902	40452352
1	40473202	40473352
1	40475452	40475602
1	40477252	40477552
1	40496152	40496302
1	40530161	40530311
1	40535711	40535861
1	40567061	40567211
1	40896161	40896311
1	40909811	40909961
1	40910261	40910411
1	41023661	41023961
1	41024261	41024411
1	41024861	41025011
1	41025761	41025911
1	41028311	41028911
1	41037011	41037311
1	41037611	41037761
1	41038061	41038811
1	41044811	41044961
1	41049461	41049611
1	41154611	41154911
1	41175011	41175161
1	41204561	41204711
1	41205911	41206061
1	41278211	41278511
1	41279711	41280011
1	41280761	41280911
1	41281361	41281511
1	41283011	41283611
1	41284211	41284961
1	41285561	41286011
1	41286761	41288711
1	41289461	41289761
1	41290211	41290361
1	41290961	41291711
1	41292611	41292911
1	41374361	41374511
1	41696711	41696861
1	41737211	41737511
1	41761511	41761811
1	42101670	42101820
1	42104670	42104820
1	42107670	42107820
1	42563670	42563970
1	42568620	42569070
1	42570870	42571320
1	42942120	42942270
1	42964920	42965220
1	42982470	42982620
1	43115820	43115970
2	169650	169800
2	302100	302250
2	304500	304650
2	334800	334950
2	341700	341850
2	463800	463950
2	846750	847050
2	1552159	1552309
2	1552759	1553059
2	1554259	1554559
2	1556209	1556509
2	2157559	2157859
2	2176459	2176609
2	2179009	2179159
2	2252659	2252959
2	2254009	2254309
2	2743009	2743309
2	2743909	2745559
2	2745859	2747959
2	2748709	2748859
2	2751859	2752159
2	2752609	2753509
2	2762059	2762209
2	2770609	2770759
2	3210818	3210968
2	3432668	3432968
2	3469568	3469868
2	3479618	3479918
2	3762818	3762968
2	3763868	3764168
2	3769718	3770468
2	3834818	3835118
2	3836768	3837068
2	3837368	3837518
2	3844868	3845018
2	3934118	3934268
2	3983168	3983318
2	3984518	3984668
2	4000868	4001168
2	4010468	4010768
2	4053368	4053518
2	4055768	4056368
2	4056668	4056818
2	4060868	4061318
2	4062818	4063268
2	4064468	4064618
2	4065668	4066568
2	4073168	4073618
2	4074518	4074818
2	4075418	4075718
2	4076018	4076468
2	4077068	4077368
2	4079318	4079768
2	4080068	4080668
2	4084568	4084718
2	4224927	4225377
2	4225827	4226427
2	4227777	4228077
2	4237977	4238127
2	4238427	4238577
2	4239027	4239477
2	4242777	4242927
2	4244277	4245027
2	4292877	4293027
2	4390377	4390527
2	4396077	4396227
2	4637577	4637727
2	4711227	4711527
2	4837227	4837377
2	4951227	4951677
2	4953327	4953477
2	4953927	4954077
2	4955427	4955577
2	4955877	4956027
2	4956927	4957527
2	4957977	4958127
2	4958577	4958877
2	4959927	4960227
2	4960827	4961427
2	4963077	4963227
2	4963677	4963977
2	4998477	4998777
2	4999827	4999977
2	5000727	5001027
2	5004027	5004627
2	5005077	5005527
2	5005977	5006127
2	5007027	5007177
2	5007477	5008827
2	5010177	5010327
2	5011077	5011227
2	5015577	5015877
2	5020377	5020527
2	5020827	5020977
2	5021727	5021877
2	5024577	5025027
2	5025327	5025627
2	5026527	5026677
2	5027577	5027727
2	5028027	5028177
2	5032227	5032827
2	5034927	5035827
2	5036277	5036577
2	5037177	5037927
2	5038827	5038977
2	5039277	5039577
2	5040777	5041077
2	5041527	5042577
2	5043627	5043777
2	5044077	5044227
2	5057577	5057727
2	5206227	5206377
2	5311077	5311227
2	5319777	5319927
2	5777986	5778136
2	5881336	5881486
2	5927536	5927836
2	6000436	6000586
2	6002386	6002686
2	6003286	6003586
2	6003886	6004186
2	6034786	6035236
2	6106936	6107086
2	6218086	6218236
2	6268936	6269086
2	6375436	6376036
2	6554386	6554686
2	6557686	6558136
2	6560086	6560236
2	6631336	6631636
2	6632386	6632536
2	6633886	6634036
2	6635686	6635986
2	6702136	6702436
2	6705436	6705586
2	6766036	6766336
2	6769186	6769636
2	6770086	6770386
2	6791536	6791686
2	6792136	6793036
2	6793336	6794086
2	6938086	6938236
2	7340795	7340945
2	7352645	7352795
2	7482395	7483145
2	7486745	7486895
2	7488395	7488845
2	7500245	7500395
2	7528445	7528595
2	7535045	7535195
2	7602695	7602845
2	7603895	7604045
2	7604495	7605245
2	7606145	7606295
2	7606745	7608095
2	7609745	7609895
2	7611395	7611695
2	8281745	8281895
2	8617554	8617704
2	8618454	8619054
2	8765304	8765454
2	8780904	8781054
2	8855004	8855154
2	8858454	8858604
2	8908554	8909004
2	8914854	8915004
2	8915454	8915604
2	8954154	8954454
2	9019104	9019404
2	9846463	9846613
2	9848263	9848413
2	9852013	9852463
2	9855463	9855763
2	9856063	9856963
2	9862213	9862513
2	9863263	9863413
2	9863863	9864163
2	9869263	9869563
2	9873163	9873313
2	9876163	9876463
2	9878413	9878713
2	9880513	9880663
2	10120513	10120663
2	10123213	10123363
2	10128463	10128613
2	10131163	10131313
2	10365013	10365163
2	10366813	10366963
2	10368313	10368463
2	10369963	10370113
2	10370413	10370713
2	10371013	10371463
2	10372213	10373413
2	10373713	10373863
2	10374163	10375063
2	10375363	10375963
2	10376263	10376413
2	10378213	10378513
2	10461313	10461613
2	10745713	10746013
2	10816063	10816213
2	11493272	11493422
2	11496722	11496872
2	11499422	11499572
2	11500022	11500172
2	11501822	11501972
2	11508272	11508722
2	11509172	11509322
2	11509622	11509922
2	11598872	11599022
2	11637872	11638322
2	11638622	11638772
2	11640872	11641172
2	11644322	11644622
2	11645072	11645222
2	11646122	11646422
2	11647922	11648372
2	11648672	11648822
2	11652272	11652422
2	12058022	12058172
2	12097172	12097322
2	12097772	12097922
2	12098372	12098672
2	12100472	12100622
2	12101222	12101522
2	12102272	12102422
2	12104522	12104822
2	12106172	12106322
2	12121622	12121922
2	12122972	12123422
2	12125972	12126272
2	12261722	12261872
2	12341072	12341222
2	12456122	12456272
2	12528572	12528722
2	12530222	12530372
2	12531272	12531422
2	12662181	12664731
2	12665331	12665481
2	12665781	12665931
2	12667431	12667731
2	12668031	12669231
2	12670731	12671331
2	12671931	12672081
2	12675681	12675831
2	12679731	12680181
2	12680931	12681231
2	12686631	12687081
2	12701331	12701781
2	12712431	12712581
2	12713481	12715431
2	12716031	12718431
2	12719781	12720381
2	12720831	12720981
2	12721281	12721431
2	12724131	12724281
2	12724581	12724731
2	12725331	12725931
2	12726381	12727731
2	12728181	12728631
2	12729981	12730581
2	12731031	12731331
2	12731781	12733431
2	12929331	12929481
2	12968781	12969081
2	12976131	12976281
2	13008231	13008531
2	13505481	13505631
2	14141740	14142190
2	14143090	14143240
2	14144290	14144590
2	14417140	14417290
2	14625490	14625940
2	14720740	14721190
2	14859190	14859490
2	14995390	14995540
2	14998390	14998540
2	15046690	15046840
2	15255790	15256090
2	15256390	15256840
2	15257140	15258040
2	15355090	15355240
2	15959249	15959549
2	15980849	15980999
2	16047449	16047899
2	16092599	16092749
2	16221899	16222499
2	16223399	16223549
2	16225049	16225949
2	16226399	16226849
2	16306799	16306949
2	16330049	16330349
2	16334249	16334549
2	16336799	16336949
2	16338449	16339049
2	16339649	16340249
2	16441049	16441199
2	16801308	16801458
2	16812258	16812408
2	16899708	16899858
2	16905708	16905858
2	17166408	17166558
2	17167008	17167158
2	17170008	17170158
2	17174058	17174208
2	17174508	17174808
2	17176008	17176158
2	17177058	17177358
2	17194758	17195208
2	17196558	17196708
2	17198058	17198358
2	17200008	17200308
2	17200908	17201358
2	17201658	17202108
2	17202558	17203008
2	17204658	17204808
2	17205858	17206158
2	17207208	17207508
2	17214258	17214408
2	17218158	17218758
2	17219058	17219358
2	17219808	17219958
2	17221608	17221908
2	17222958	17223108
2	17225358	17225508
2	17225808	17227308
2	17227908	17228058
2	17228358	17228658
2	17229258	17229558
2	17230008	17230308
2	17230608	17230758
2	17231508	17231958
2	17237808	17238408
2	17241258	17241408
2	17241708	17242308
2	17244708	17245008
2	17245608	17246208
2	17246508	17248008
2	17248308	17249508
2	17249808	17250108
2	17250708	17250858
2	17251158	17252058
2	17252358	17252508
2	17253708	17254008
2	17255358	17255958
2	17256708	17256858
2	17257158	17258808
2	17259108	17259258
2	17260158	17261058
2	17261808	17261958
2	17263308	17263608
2	17264508	17264658
2	17264958	17265558
2	17266308	17266908
2	17267208	17267358
2	17270808	17271558
2	17274408	17274558
2	17277108	17277258
2	17307708	17307858
2	17310258	17310408
2	17310708	17310858
2	17314008	17314308
2	17316708	17316858
2	17327958	17328108
2	17371158	17371458
2	17371908	17372208
2	17577408	17577558
2	18022908	18023208
2	18049908	18050208
2	18088458	18088608
2	18230017	18230167
2	18354817	18354967
2	18399067	18399367
2	18439867	18440167
2	18455767	18456067
2	18548317	18548467
2	18548767	18548917
2	18549817	18549967
2	18550867	18553267
2	18553567	18553717
2	18646117	18646267
2	18687967	18688117
2	18809467	18809617
2	18988867	18989167
2	19229617	19229767
2	19375417	19375567
2	19402717	19403167
2	19406467	19406767
2	19412467	19412617
2	19469467	19469617
2	19667426	19667576
2	19900826	19900976
2	19902926	19903226
2	19947176	19947326
2	19974026	19974176
2	19974926	19975076
2	19977326	19977476
2	19979726	19980326
2	19985126	19985276
2	19987376	19987526
2	19987976	19988126
2	20005826	20006126
2	20065526	20065676
2	20145926	20146076
2	20232626	20233076
2	20237726	20237876
2	20247026	20247626
2	20247926	20248076
2	20248376	20248526
2	20249276	20249426
2	20250926	20251676
2	20252576	20253626
2	20253926	20255576
2	20256026	20256176
2	20258726	20259176
2	20260526	20261126
2	20261576	20261726
2	20276726	20276876
2	20277626	20277926
2	20332526	20332826
2	20353826	20353976
2	20530676	20530976
2	20536226	20536376
2	20539526	20539676
2	20581526	20581676
2	20618126	20618276
2	20662826	20662976
2	20667476	20668826
2	20669126	20669276
2	20669726	20670026
2	20671076	20671376
2	20673476	20673926
2	20675576	20675726
2	21002835	21003135
2	21003585	21004335
2	21004785	21006585
2	21007185	21007485
2	21010785	21010935
2	21011385	21011685
2	21083235	21083535
2	21105585	21106185
2	21126585	21126735
2	21129735	21129885
2	21136635	21136785
2	21138135	21138585
2	21139785	21140235
2	21147885	21148185
2	21150285	21150585
2	21531585	21531735
2	21781335	21781635
2	21810285	21810435
2	21816885	21817185
2	21833235	21833385
2	21852135	21852585
2	21855135	21855435
2	21856185	21856485
2	21856935	21857385
2	21858135	21858285
2	21860985	21861285
2	21862635	21862785
2	21897285	21897435
2	21899535	21899835
2	21900435	21900735
2	22047585	22047735
2	22078785	22078935
2	22085535	22085985
2	22089885	22090035
2	22090335	22090485
2	22093335	22093635
2	22529344	22529494
2	22664494	22664644
2	22694194	22694494
2	22699444	22699594
2	23484094	23484244
2	23594944	23595094
2	23637694	23637844
2	23639644	23639794
2	23640094	23640244
2	23642494	23642944
2	23646844	23646994
2	23649694	23650294
2	23652694	23653594
2	23655244	23655694
2	23657794	23657944
2	23665594	23665744
2	23670094	23670244
2	23672194	23672344
2	23672644	23672794
2	23673244	23673544
2	23674594	23675344
2	23678344	23678644
2	23681644	23681794
2	23684494	23684644
2	23686144	23686294
2	23686594	23687644
2	23688244	23688544
2	23690194	23690944
2	23692894	23693344
2	23696344	23696644
2	23696944	23697094
2	23698144	23698294
2	23700394	23700694
2	23702194	23702644
2	23703244	23704144
2	23704744	23705044
2	23705344	23705494
2	23707744	23708344
2	23712694	23713144
2	23713894	23714194
2	23814803	23814953
2	23816003	23816153
2	24123803	24123953
2	24262253	24262403
2	24395903	24396053
2	24805703	24806153
2	24837353	24838703
2	24839153	24839303
2	24843803	24844103
2	24954203	24955103
2	24956303	24957803
2	24958103	24958403
2	24958703	24959303
2	24960503	24961403
2	24961703	24962153
2	24962903	24963503
2	24965303	24965453
2	24967553	24967853
2	24987803	24987953
2	25013003	25013153
2	25203012	25203312
2	25210962	25211112
2	25213512	25213662
2	25324212	25324362
2	25326762	25326912
2	25677012	25677162
2	25780812	25781112
2	25859412	25859712
2	25874112	25874262
2	25962162	25962462
2	25986162	25986912
2	25987512	25987662
2	25988412	25988712
2	25999062	25999362
2	26081712	26081862
2	26130762	26130912
2	26132862	26133012
2	26281062	26281212
2	26282412	26282562
2	26285712	26286762
2	26360412	26360712
2	26467512	26467812
2	26475462	26475762
2	26499762	26500062
2	26546971	26547121
2	26696821	26697121
2	26787121	26787271
2	26813821	26813971
2	27089521	27089821
2	27146521	27146671
2	27164071	27164221
2	27181021	27181171
2	27273421	27273571
2	27307621	27307771
2	27308221	27308371
2	27310471	27310921
2	27328621	27328771
2	27357121	27357571
2	27404671	27404821
2	27429271	27429871
2	27431071	27431371
2	27433321	27433471
2	27436621	27436771
2	27438871	27439021
2	27439321	27439771
2	27443971	27444271
2	27445171	27445471
2	27446671	27447121
2	27449521	27449671
2	27450721	27451021
2	27624421	27624571
2	27674821	27674971
2	27693871	27694171
2	27867421	27867571
2	27873271	27873421
2	27876121	27876271
2	27919621	27920221
2	27922471	27922621
2	27923521	27924121
2	27924421	27925321
2	27926821	27927121
2	27928171	27928321
2	27928921	27929221
2	27930271	27931021
2	27931771	27932071
2	27932330	27933080
2	27935930	27936230
2	27937130	27938030
2	27938480	27938630
2	27940730	27940880
2	27941930	27942230
2	27942530	27942830
2	27944030	27944180
2	27945080	27945380
2	27951980	27952130
2	27955130	27955430
2	27957530	27957680
2	28152380	28152680
2	28174880	28175180
2	28244030	28244180
2	28372280	28372430
2	28633580	28633730
2	28639430	28639880
2	28640630	28640930
2	28641380	28641830
2	28642430	28642730
2	28644980	28645280
2	28646630	28647680
2	28648730	28649180
2	28649930	28650080
2	28655630	28656080
2	28661030	28661180
2	28666280	28666880
2	28667180	28667330
2	28667780	28667930
2	28722830	28722980
2	28723580	28723730
2	28752680	28752830
2	28757630	28757930
2	28786880	28787480
2	28871780	28871930
2	29125430	29125580
2	29406189	29406339
2	29408739	29408889
2	29448789	29448939
2	29449539	29449689
2	29488989	29489289
2	29571639	29571939
2	29618439	29618739
2	29683089	29683239
2	29683539	29683689
2	29685339	29685789
2	29689239	29689389
2	29691339	29692089
2	29699439	29700489
2	29700789	29701089
2	29701389	29701539
2	29701989	29702289
2	29704689	29704839
2	29705289	29705889
2	29706489	29706639
2	29710539	29710689
2	29710989	29711139
2	29931789	29931939
2	30055689	30056139
2	30060639	30060939
2	30065139	30065439
2	30066939	30067239
2	30070089	30070239
2	30086589	30086739
2	30087039	30087189
2	30223239	30223389
2	30339639	30339789
2	30395589	30395739
2	30455439	30455739
2	30648789	30649089
2	30651939	30652089
2	30784498	30784648
2	30815398	30815548
2	30816748	30816898
2	30820348	30820648
2	30824698	30824848
2	31084498	31085398
2	31086148	31086448
2	31087348	31087798
2	31088398	31088548
2	31088848	31089448
2	31392598	31393348
2	31395898	31396048
2	31566148	31566448
2	31566748	31567348
2	31569148	31569748
2	31570348	31570798
2	31571548	31571698
2	31571998	31572148
2	31574698	31574998
2	31576498	31577998
2	31578598	31579048
2	31579348	31580098
2	31580998	31581598
2	31581898	31582348
2	31582648	31582948
2	31627948	31628248
2	31635148	31635298
2	31639648	31639948
2	31641598	31641748
2	31658848	31659148
2	31670098	31670398
2	31730548	31730698
2	31759798	31760698
2	31761898	31763098
2	31765498	31765948
2	31927198	31927348
2	32241857	32242007
2	32387657	32388557
2	32485907	32486057
2	32531507	32531657
2	32581907	32582507
2	32619857	32620007
2	32844857	32845007
2	32845907	32846057
2	32905007	32905457
2	33006107	33006257
2	33099407	33099707
2	33603816	33603966
2	33647016	33647316
2	33665166	33665466
2	33822666	33822816
2	33823116	33823266
2	33823566	33825216
2	33825666	33826266
2	33894366	33894516
2	33981816	33981966
2	34165866	34166166
2	34253616	34253766
2	34388616	34388766
2	34417416	34417566
2	34607916	34608066
2	34619166	34619316
2	34621416	34621716
2	34622916	34623066
2	34624716	34625166
2	34625916	34626366
2	34669266	34669416
2	34674066	34674216
2	34676616	34676916
2	34677216	34677366
2	34679466	34679616
2	34682616	34683366
2	34684266	34684866
2	34685916	34686066
2	34689666	34689816
2	34690416	34690566
2	34691466	34691766
2	34692216	34692816
2	34693716	34693866
2	34694166	34695066
2	34696566	34697316
2	34698366	34698516
2	34699416	34699566
2	34702266	34702416
2	34864866	34865016
2	34865466	34865616
2	34866216	34866366
2	34868316	34868616
2	34871016	34871166
2	34873866	34874016
2	34950175	34950325
2	34951975	34952725
2	34953025	34953175
2	35027125	35027275
2	35033875	35034025
2	35043325	35043625
2	35143075	35143675
2	35526925	35527075
2	35542375	35542525
2	35839675	35839825
2	35853025	35853475
2	35854825	35855725
3	105300	105600
3	392850	393000
3	1155000	1155150
3	1159500	1159650
3	1160100	1161000
3	1164000	1164300
3	1165050	1165350
3	1165650	1166100
3	1167450	1167600
3	1170300	1170450
3	1270200	1270350
3	1271550	1272150
3	1273950	1274250
3	1275300	1275450
3	1279350	1279650
3	1281900	1282050
3	1282800	1283100
3	1283850	1284150
3	1286250	1286400
3	1294950	1295100
3	1306350	1306500
3	1375950	1376100
3	1529959	1530109
3	1545409	1545559
3	1680109	1680259
3	1988659	1988809
3	2121559	2121709
3	2508409	2508709
3	2510959	2511709
3	2729659	2729959
3	2732659	2732809
3	2737009	2737159
3	2954918	2955068
3	3397268	3397418
3	3434768	3435068
3	3462068	3462218
3	3559418	3559568
3	3792218	3792518
3	4166618	4166768
3	4601127	4601277
3	4677327	4677927
3	4725327	4725477
3	4753377	4753827
3	4781577	4781727
3	4806477	4806627
3	4896177	4896477
3	5012727	5012877
3	5051577	5052027
3	5055027	5055177
3	5138127	5138577
3	5188227	5188377
3	5191977	5192127
3	5351127	5351277
3	5365077	5365377
3	5720536	5720686
3	5939986	5940136
3	5940586	5940736
3	6062686	6062986
3	6063586	6063886
3	6070936	6071086
3	6073486	6073636
3	6108436	6108586
3	6726886	6727036
3	6732586	6732736
3	6735136	6735286
3	6736336	6736486
3	6967936	6968086
3	7285595	7285745
3	7286195	7286495
3	7318745	7318895
3	7343495	7343795
3	7447595	7447745
3	7519145	7519295
3	7764395	7764545
3	7769645	7772495
3	7773695	7773995
3	7774295	7774445
3	7775495	7776695
3	7776995	7778945
3	7780295	7781645
3	7784645	7784945
3	7786145	7786895
3	7787495	7788095
3	7788545	7788845
3	7789595	7789745
3	7791245	7791545
3	7793045	7793195
3	7794095	7794245
3	7794545	7794845
3	7798595	7799045
3	7973045	7973345
3	8773254	8773404
3	9190254	9190404
3	9337704	9338004
3	9345504	9346104
3	9348354	9348504
3	9428754	9429204
3	9553704	9553854
3	9833863	9834163
3	10006513	10006663
3	10006963	10007563
3	10008313	10008763
3	10014013	10014163
3	10033063	10033213
3	10034263	10034413
3	10036063	10036513
3	10036963	10037713
3	10038163	10038613
3	10041463	10041763
3	10044913	10045663
3	10046263	10046713
3	10047463	10047613
3	10048213	10048363
3	10048663	10048813
3	10049113	10049263
3	10050613	10050913
3	10053163	10053463
3	10057363	10057663
3	10060063	10060213
3	10086013	10086163
3	10090513	10090813
3	10091563	10091863
3	10092313	10093063
3	10093513	10094413
3	10095013	10095163
3	10095913	10096663
3	10098463	10098913
3	10099513	10099963
3	10329463	10329763
3	10426813	10426963
3	10717663	10717813
3	10766113	10766563
3	10792663	10792813
3	10809313	10809613
3	10907263	10907413
3	11092813	11093113
3	11196122	11196272
3	11198372	11198522
3	11200772	11202272
3	11203022	11204222
3	11204822	11204972
3	11205722	11205872
3	11209022	11209172
3	11281622	11281922
3	11318222	11318372
3	11338622	11338772
3	11441972	11442122
3	11494472	11494772
3	11821022	11821322
3	11826872	11827022
3	12036572	12036722
3	12040022	12040322
3	12040922	12041372
3	12042872	12043172
3	12044222	12044372
3	12110072	12110222
3	12167522	12167672
3	12632181	12632331
3	12633081	12633381
3	12737331	12737481
3	13643631	13643781
3	13647081	13647231
3	13659381	13659531
3	13662981	13663131
3	13895781	13895931
3	13897131	13897281
3	13897581	13897881
3	13903281	13903581
3	13904631	13904931
3	13906581	13906881
3	13910331	13910481
3	13939131	13939281
3	14008840	14008990
3	14038540	14038690
3	14039740	14039890
3	14041390	14041540
3	14044090	14044240
3	14044840	14044990
3	14049040	14049190
3	14056690	14056840
3	14058340	14058640
3	14059690	14060290
3	14060590	14060740
3	14069740	14069890
3	14155390	14155690
3	14169490	14169640
3	14187940	14188540
3	14188840	14189740
3	14191540	14191690
3	14192590	14193190
3	14221990	14222440
3	14228290	14228440
3	14230240	14230390
3	14230690	14230990
3	14264290	14264440
3	14264890	14265490
3	14267290	14269390
3	14269840	14270590
3	14270890	14271490
3	14271940	14272540
3	14277040	14277340
3	14278390	14278540
3	14279590	14280340
3	14280640	14280790
3	14281390	14281690
3	14281990	14282590
3	14282890	14283040
3	14283340	14284540
3	14285140	14285290
3	14285890	14286040
3	14293540	14293990
3	14301640	14301940
3	14302540	14302840
3	14304040	14304190
3	14304640	14305540
3	14305840	14307190
3	14307790	14308090
3	14308390	14309140
3	14309440	14309740
3	14310340	14312590
3	14312890	14313490
3	14314540	14315740
3	14316340	14316940
3	14317540	14317690
3	14318440	14318590
3	14318890	14319040
3	14319340	14319640
3	14323990	14324140
3	14344390	14344540
3	14359540	14359690
3	14487340	14487490
3	14490490	14490790
3	14492290	14492440
3	14540290	14540440
3	14588440	14588590
3	14592040	14592490
3	14623390	14623540
3	14624890	14625040
3	14786290	14786440
3	15144790	15144940
3	15376499	15376799
3	15390449	15390599
3	15439649	15439949
3	15571349	15571499
3	15649649	15649949
3	15696899	15697049
3	15714599	15714749
3	15717299	15717449
3	15718799	15718949
3	15719399	15719549
3	15720149	15720299
3	15722849	15723899
3	15726299	15726749
3	15727499	15728699
3	15728999	15729299
3	15729749	15729899
3	15730349	15730499
3	15731099	15731399
3	15732149	15732599
3	15732899	15733349
3	15733799	15734099
3	15734399	15735149
3	15735749	15735899
3	15736499	15736949
3	15737849	15738149
3	15738599	15740399
3	15741299	15741449
3	15741749	15742049
3	15743249	15743399
3	15744449	15745049
3	15745649	15745799
3	15746099	15746549
3	15746849	15748799
3	15750149	15750299
3	15751199	15751349
3	15751649	15751799
3	15752099	15752249
3	15752549	15752999
3	15754349	15754649
3	15754949	15755099
3	15761999	15763049
3	15763799	15764099
3	15764849	15764999
3	15776099	15776249
3	15874949	15875099
3	15876749	15877199
3	15878699	15879149
3	15879449	15880499
3	15881099	15881249
3	15923099	15923249
3	15931649	15931949
3	15973799	15973949
3	15977399	15977549
3	16175399	16175549
3	16366199	16366349
3	16447649	16447799
3	16462199	16462349
3	16476899	16477049
3	16556999	16557149
3	16560149	16560299
3	16635749	16635899
3	17577258	17577408
3	17821158	17821308
3	17867658	17867808
3	17897658	17897808
3	17898558	17899008
3	17899758	17899908
3	17901558	17902158
3	17902458	17903958
3	17904258	17904858
3	17905308	17905608
3	17905908	17906658
3	17912358	17912508
3	17912958	17913558
3	17914008	17914158
3	18091308	18092358
3	18097308	18097908
3	18098508	18098808
3	18102258	18102558
3	18130758	18130908
3	18440317	18440467
3	18536317	18536467
3	18544267	18544417
3	18930817	18930967
3	19005667	19005817
3	19200667	19201117
3	19250617	19250767
3	19252417	19252567
3	20232476	20232626
3	20301476	20301776
3	20302676	20303126
3	20369726	20370026
3	20418926	20419076
3	20419826	20419976
3	20420276	20420576
3	20421326	20422526
3	20422976	20423276
3	20424326	20424776
3	20426426	20426576
3	20427326	20427776
3	20475026	20475326
3	20584976	20585126
3	20654726	20654876
3	20656376	20658326
3	20658926	20659376
3	20660126	20660426
3	20661326	20661776
[truncated: 6,162 more rows]
