# Supplementary material for: Multi-layered epigenetic control of persistent and stage-specific imprinted genes in rice endosperm
Source: Research Square preprint supplement (doi:10.21203/rs.3.rs-2403620/v1), 2023-01-11
Supplement: Supplementary file 19 [file Supplementary Data 7.xlsx]

## Sheet: clusterd imprinted genes
Supplementary Data 7. List of clustered imprinted genes and their epigenetic marks.
cluster	locus name	imprint class		Epigenetic marks				MSU annotaion
				CG DMRS	CHG DMRS	H3K27me3 bias
MEG cluster 1	LOC_Os05g26690	5 DAP-specific		n.d.	n.d.	n.d.		PROLM15 - Prolamin precursor, putative, expressed
MEG cluster 1	LOC_Os05g26720	5 DAP-specific		n.d.	n.d.	n.d.		PROLM16 - Prolamin precursor, expressed
MEG cluster 1	LOC_Os05g26750	5 and 7 DAP overlapped		n.d.	n.d.	n.d.		PROLM17 - Prolamin precursor, expressed
MEG cluster 1	LOC_Os05g26770	5 and 7 DAP overlapped		n.d.	n.d.	n.d.		PROLM18 - Prolamin precursor, expressed
PEG cluster 1	LOC_Os01g69850	Persistent		Maternal demethylation	Maternal demethylation	Maternal bias		OsMADS65 - MADS-box family gene with MIKC* type-box, expressed
PEG cluster 1	LOC_Os01g69910	7 DAP-specific		n.d.	n.d.	Maternal bias		calmodulin-binding transcription activator, putative, expressed
PEG cluster 1	LOC_Os01g69920	3 DAP-specific		Maternal demethylation	n.d.	Maternal bias		histidine kinase, putative, expressed
PEG cluster 1	LOC_Os01g69930	Persistent		Maternal demethylation	n.d.	Maternal bias		dnaJ domain containing protein, expressed
PEG cluster 1	LOC_Os01g69940	Persistent		Maternal demethylation	n.d.	Maternal bias		OsFBX32 - F-box domain containing protein, expressed
PEG cluster 1	LOC_Os02g29040	7 DAP-specific		Maternal demethylation	n.d.	Maternal bias		ankyrin repeat domain containing protein, putative, expressed
PEG cluster 1	LOC_Os02g29110	Persistent		n.d.	n.d.	n.d.		ankyrin repeat family protein, putative, expressed
PEG cluster 1	LOC_Os02g29130	3 and 7 DAP overlapped		Maternal demethylation	n.d.	Maternal bias		transposon protein, putative, unclassified, expressed
PEG cluster 1	LOC_Os02g29140	Persistent		Maternal demethylation	n.d.	Maternal bias		ankyrin, putative, expressed
PEG cluster 1	LOC_Os02g29150	3 and 5 DAP overlapped		n.d.	n.d.	Maternal bias		OsFBO11 - F-box and other domain containing protein, expressed
PEG cluster 2	LOC_Os03g60120	3 and 5 DAP overlapped		Maternal demethylation	n.d.	n.d.		AP2 domain containing protein, expressed
PEG cluster 2	LOC_Os03g60130	Persistent		n.d.	n.d.	Maternal bias		transcription elongation factor protein, putative, expressed
PEG cluster 2	LOC_Os03g60140	5 DAP-specific		Maternal demethylation	n.d.	Maternal bias		U-box domain-containing protein, putative, expressed
PEG cluster 2	LOC_Os03g60150	Persistent		Maternal demethylation	n.d.	Maternal bias		protein kinase domain containing protein, expressed
PEG cluster 3	LOC_Os07g48160	5 and 7 DAP overlapped		n.d.	n.d.	Maternal bias		alpha-galactosidase precursor, putative, expressed
PEG cluster 3	LOC_Os07g48170	Persistent		Maternal demethylation	n.d.	Maternal bias		nucleotidyltransferase, putative, expressed
PEG cluster 3	LOC_Os07g48180	5 and 7 DAP overlapped		Maternal demethylation	n.d.	Maternal bias		bZIP transcription factor domain containing protein, expressed
PEG cluster 3	LOC_Os07g48229	7 DAP-specific		n.d.	n.d.	n.d.		vacuolar-sorting receptor precursor, putative, expressed
PEG cluster 3	LOC_Os07g48260	3 DAP-specific		n.d.	n.d.	Maternal bias		WRKY47, expressed
PEG cluster 4	LOC_Os10g04860	3 DAP-specific		n.d.	n.d.	n.d.		aldehyde oxidase, putative, expressed
PEG cluster 4	LOC_Os10g04890	Persistent		n.d.	n.d.	Maternal bias		expressed protein
PEG cluster 4	LOC_Os10g04900	5 and 7 DAP overlapped		n.d.	n.d.	Maternal bias		OsFBX364 - F-box domain containing protein, expressed
PEG cluster 4	LOC_Os10g04980	Persistent		n.d.	n.d.	Maternal bias		OsFBX365 - F-box domain containing protein, expressed
PEG cluster 5	LOC_Os10g05500	Persistent		n.d.	n.d.	n.d.		OsFBX370 - F-box domain containing protein, expressed
PEG cluster 5	LOC_Os10g05520	Persistent		Maternal demethylation	Maternal demethylation	Maternal bias		OsFBX371 - F-box domain containing protein, expressed
PEG cluster 5	LOC_Os10g05530	7 DAP-specific		Maternal demethylation	n.d.	Maternal bias		OsFBX372 - F-box domain containing protein, expressed
PEG cluster 5	LOC_Os10g05540	3 DAP-specific		Maternal demethylation	n.d.	Maternal bias		OsFBX373 - F-box domain containing protein, expressed
PEG cluster 6	LOC_Os11g31330	Persistent		Maternal demethylation	n.d.	Maternal bias		no apical meristem protein, putative, expressed
PEG cluster 6	LOC_Os11g31340	Persistent		Maternal demethylation	n.d.	Maternal bias		no apical meristem protein, putative, expressed
PEG cluster 6	LOC_Os11g31360	Persistent		Maternal demethylation	n.d.	Maternal bias		no apical meristem protein, putative, expressed
PEG cluster 6	LOC_Os11g31380	Persistent		Maternal demethylation	n.d.	Maternal bias		no apical meristem protein, putative, expressed
PEG cluster 7	LOC_Os12g32050	3 DAP-specific		n.d.	n.d.	n.d.		expressed protein
PEG cluster 7	LOC_Os12g32060	Persistent		n.d.	n.d.	n.d.		expressed protein
PEG cluster 7	LOC_Os12g32080	Persistent		n.d.	n.d.	n.d.		expressed protein
PEG cluster 7	LOC_Os12g32150	Persistent		n.d.	n.d.	Maternal bias		expressed protein
PEG cluster 7	LOC_Os12g32170	Persistent		n.d.	n.d.	Maternal bias		expressed protein
PEG cluster 7	LOC_Os12g32180	Persistent		Maternal demethylation	n.d.	Maternal bias		cornichon protein, putative, expressed
